# Supplementary material for: Integration of Human Protein Sequence and Protein-Protein Interaction Data by Graph Autoencoder to Identify Novel Protein-Abnormal Phenotype Associations
Source: Cells. 2022 Aug 10;11(16):2485. doi: 10.3390/cells11162485 (PMC9406402; doi:10.3390/cells11162485)
Supplement: Supplementary file 1 [file cells-11-02485-s001.zip]

Archive with 7 entries (7 files):
- Supplementary Figure S1.pdf
- Supplementary Table S1.xlsx
- Supplementary Table S2.xlsx
- Supplementary Table S3.xlsx
- Supplementary Table S4.xlsx
- Supplementary Table S5.xlsx
- Supplementary Table S6.xlsx
