# Supplementary material for: Integration of Human Protein Sequence and Protein-Protein Interaction Data by Graph Autoencoder to Identify Novel Protein-Abnormal Phenotype Associations
Source: Cells. 2022 Aug 10;11(16):2485. doi: 10.3390/cells11162485 (PMC9406402; doi:10.3390/cells11162485)
Supplement: Supplementary file 1 [file cells-11-02485-s001.zip › Supplementary Table S1.xlsx]

## Sheet: Table S1A
Supplementary Table S1A. Gold standard dataset.
Human Phenotype Ontology (HPO) were downloaded from https://hpo.jax.org (June 2019). This dataset was expanded using true path rule, that is, if a gene is annotated with a HPO term T, we consider that this gene is also inherently annotated with all the ancestors of T. Finally, 496,202 gene-phenotype associations were obtained with an average of 126 HPO annotations per gene.
Entrez Gene ID	Gene Name	HPO Term ID	HPO Term Name
16	AARS1 AARS	HP:0000002	Abnormality of body height
18	ABAT GABAT	HP:0000002	Abnormality of body height
25	ABL1 ABL JTK7	HP:0000002	Abnormality of body height
54	ACP5	HP:0000002	Abnormality of body height
58	ACTA1 ACTA	HP:0000002	Abnormality of body height
59	ACTA2 ACTSA ACTVS GIG46	HP:0000002	Abnormality of body height
60	ACTB	HP:0000002	Abnormality of body height
71	ACTG1 ACTG	HP:0000002	Abnormality of body height
103	ADAR ADAR1 DSRAD G1P1 IFI4	HP:0000002	Abnormality of body height
175	AGA	HP:0000002	Abnormality of body height
176	ACAN AGC1 CSPG1 MSK16	HP:0000002	Abnormality of body height
178	AGL GDE	HP:0000002	Abnormality of body height
197	AHSG FETUA PRO2743	HP:0000002	Abnormality of body height
207	AKT1 PKB RAC	HP:0000002	Abnormality of body height
224	ALDH3A2 ALDH10 FALDH	HP:0000002	Abnormality of body height
226	ALDOA ALDA	HP:0000002	Abnormality of body height
242	ALOX12B	HP:0000002	Abnormality of body height
249	ALPL	HP:0000002	Abnormality of body height
271	AMPD2	HP:0000002	Abnormality of body height
286	ANK1 ANK	HP:0000002	Abnormality of body height
355	FAS APT1 FAS1 TNFRSF6	HP:0000002	Abnormality of body height
359	AQP2	HP:0000002	Abnormality of body height
372	ARCN1 COPD	HP:0000002	Abnormality of body height
411	ARSB	HP:0000002	Abnormality of body height
412	STS ARSC1	HP:0000002	Abnormality of body height
415	ARSL ARSE	HP:0000002	Abnormality of body height
421	ARVCF	HP:0000002	Abnormality of body height
427	ASAH1 ASAH HSD-33 HSD33	HP:0000002	Abnormality of body height
435	ASL	HP:0000002	Abnormality of body height
472	ATM	HP:0000002	Abnormality of body height
473	RERE ARG ARP ATN1L KIAA0458	HP:0000002	Abnormality of body height
513	ATP5F1D ATP5D	HP:0000002	Abnormality of body height
523	ATP6V1A ATP6A1 ATP6V1A1 VPP2	HP:0000002	Abnormality of body height
526	ATP6V1B2 ATP6B2 VPP3	HP:0000002	Abnormality of body height
529	ATP6V1E1 ATP6E ATP6E2	HP:0000002	Abnormality of body height
538	ATP7A MC1 MNK	HP:0000002	Abnormality of body height
545	ATR FRP1	HP:0000002	Abnormality of body height
546	ATRX RAD54L XH2	HP:0000002	Abnormality of body height
547	KIF1A ATSV C2orf20	HP:0000002	Abnormality of body height
554	AVPR2 ADHR DIR DIR3 V2R	HP:0000002	Abnormality of body height
579	NKX3-2 BAPX1 NKX3B	HP:0000002	Abnormality of body height
582	BBS1 BBS2L2	HP:0000002	Abnormality of body height
583	BBS2	HP:0000002	Abnormality of body height
585	BBS4	HP:0000002	Abnormality of body height
595	CCND1 BCL1 PRAD1	HP:0000002	Abnormality of body height
613	BCR BCR1 D22S11	HP:0000002	Abnormality of body height
627	BDNF	HP:0000002	Abnormality of body height
633	BGN SLRR1A	HP:0000002	Abnormality of body height
641	BLM RECQ2 RECQL3	HP:0000002	Abnormality of body height
649	BMP1 PCOLC	HP:0000002	Abnormality of body height
650	BMP2 BMP2A	HP:0000002	Abnormality of body height
657	BMPR1A ACVRLK3 ALK3	HP:0000002	Abnormality of body height
658	BMPR1B	HP:0000002	Abnormality of body height
672	BRCA1 RNF53	HP:0000002	Abnormality of body height
673	BRAF BRAF1 RAFB1	HP:0000002	Abnormality of body height
675	BRCA2 FACD FANCD1	HP:0000002	Abnormality of body height
695	BTK AGMX1 ATK BPK	HP:0000002	Abnormality of body height
699	BUB1 BUB1L	HP:0000002	Abnormality of body height
701	BUB1B BUBR1 MAD3L SSK1	HP:0000002	Abnormality of body height
716	C1S	HP:0000002	Abnormality of body height
755	CFAP410 C21orf2 LRRC76	HP:0000002	Abnormality of body height
760	CA2	HP:0000002	Abnormality of body height
767	CA8 CALS	HP:0000002	Abnormality of body height
773	CACNA1A CACH4 CACN3 CACNL1A4	HP:0000002	Abnormality of body height
841	CASP8 MCH5	HP:0000002	Abnormality of body height
846	CASR GPRC2A PCAR1	HP:0000002	Abnormality of body height
857	CAV1 CAV	HP:0000002	Abnormality of body height
860	RUNX2 AML3 CBFA1 OSF2 PEBP2A	HP:0000002	Abnormality of body height
867	CBL CBL2 RNF55	HP:0000002	Abnormality of body height
871	SERPINH1 CBP1 CBP2 HSP47 SERPINH2 PIG14	HP:0000002	Abnormality of body height
990	CDC6 CDC18L	HP:0000002	Abnormality of body height
1001	CDH3 CDHP	HP:0000002	Abnormality of body height
1021	CDK6 CDKN6	HP:0000002	Abnormality of body height
1028	CDKN1C KIP2	HP:0000002	Abnormality of body height
1041	CDSN	HP:0000002	Abnormality of body height
1062	CENPE	HP:0000002	Abnormality of body height
1108	CHD4	HP:0000002	Abnormality of body height
1139	CHRNA7 NACHRA7	HP:0000002	Abnormality of body height
1146	CHRNG ACHRG	HP:0000002	Abnormality of body height
1184	CLCN5 CLCK2	HP:0000002	Abnormality of body height
1186	CLCN7	HP:0000002	Abnormality of body height
1213	CLTC CLH17 CLTCL2 KIAA0034	HP:0000002	Abnormality of body height
1277	COL1A1	HP:0000002	Abnormality of body height
1278	COL1A2	HP:0000002	Abnormality of body height
1280	COL2A1	HP:0000002	Abnormality of body height
1281	COL3A1	HP:0000002	Abnormality of body height
1289	COL5A1	HP:0000002	Abnormality of body height
1290	COL5A2	HP:0000002	Abnormality of body height
1291	COL6A1	HP:0000002	Abnormality of body height
1292	COL6A2	HP:0000002	Abnormality of body height
1293	COL6A3	HP:0000002	Abnormality of body height
1297	COL9A1	HP:0000002	Abnormality of body height
1298	COL9A2	HP:0000002	Abnormality of body height
1299	COL9A3	HP:0000002	Abnormality of body height
1300	COL10A1	HP:0000002	Abnormality of body height
1301	COL11A1 COLL6	HP:0000002	Abnormality of body height
1302	COL11A2	HP:0000002	Abnormality of body height
1311	COMP	HP:0000002	Abnormality of body height
1312	COMT	HP:0000002	Abnormality of body height
1349	COX7B	HP:0000002	Abnormality of body height
1387	CREBBP CBP	HP:0000002	Abnormality of body height
1399	CRKL	HP:0000002	Abnormality of body height
1482	NKX2-5 CSX NKX2.5 NKX2E	HP:0000002	Abnormality of body height
1487	CTBP1 CTBP	HP:0000002	Abnormality of body height
1497	CTNS	HP:0000002	Abnormality of body height
1499	CTNNB1 CTNNB OK/SW-cl.35 PRO2286	HP:0000002	Abnormality of body height
1501	CTNND2 NPRAP	HP:0000002	Abnormality of body height
1513	CTSK CTSO CTSO2	HP:0000002	Abnormality of body height
1523	CUX1 CUTL1	HP:0000002	Abnormality of body height
1528	CYB5A CYB5	HP:0000002	Abnormality of body height
1584	CYP11B1 S11BH	HP:0000002	Abnormality of body height
1586	CYP17A1 CYP17 S17AH	HP:0000002	Abnormality of body height
1588	CYP19A1 ARO1 CYAR CYP19	HP:0000002	Abnormality of body height
1594	CYP27B1 CYP1ALPHA CYP27B	HP:0000002	Abnormality of body height
1643	DDB2	HP:0000002	Abnormality of body height
1650	DDOST KIAA0115 OST48 OK/SW-cl.45	HP:0000002	Abnormality of body height
1717	DHCR7 D7SR	HP:0000002	Abnormality of body height
1718	DHCR24 KIAA0018	HP:0000002	Abnormality of body height
1729	DIAPH1 DIAP1	HP:0000002	Abnormality of body height
1736	DKC1 NOLA4	HP:0000002	Abnormality of body height
1749	DLX5	HP:0000002	Abnormality of body height
1758	DMP1	HP:0000002	Abnormality of body height
1759	DNM1 DNM	HP:0000002	Abnormality of body height
1763	DNA2 DNA2L KIAA0083	HP:0000002	Abnormality of body height
1788	DNMT3A	HP:0000002	Abnormality of body height
1789	DNMT3B	HP:0000002	Abnormality of body height
1795	DOCK3 KIAA0299 MOCA	HP:0000002	Abnormality of body height
1801	DPH1 DPH2L DPH2L1 OVCA1	HP:0000002	Abnormality of body height
1804	DPP6	HP:0000002	Abnormality of body height
1836	SLC26A2 DTD DTDST	HP:0000002	Abnormality of body height
1848	DUSP6 MKP3 PYST1	HP:0000002	Abnormality of body height
1855	DVL1	HP:0000002	Abnormality of body height
1857	DVL3 KIAA0208	HP:0000002	Abnormality of body height
1859	DYRK1A DYRK MNB MNBH	HP:0000002	Abnormality of body height
1889	ECE1	HP:0000002	Abnormality of body height
1890	TYMP ECGF1	HP:0000002	Abnormality of body height
1908	EDN3	HP:0000002	Abnormality of body height
1910	EDNRB ETRB	HP:0000002	Abnormality of body height
1911	PHC1 EDR1 PH1	HP:0000002	Abnormality of body height
1917	EEF1A2 EEF1AL STN	HP:0000002	Abnormality of body height
1947	EFNB1 EFL3 EPLG2 LERK2	HP:0000002	Abnormality of body height
1962	EHHADH ECHD	HP:0000002	Abnormality of body height
1968	EIF2S3 EIF2G	HP:0000002	Abnormality of body height
2006	ELN	HP:0000002	Abnormality of body height
2033	EP300 P300	HP:0000002	Abnormality of body height
2058	EPRS1 EPRS GLNS PARS QARS QPRS PIG32	HP:0000002	Abnormality of body height
2067	ERCC1	HP:0000002	Abnormality of body height
2068	ERCC2 XPD XPDC	HP:0000002	Abnormality of body height
2071	ERCC3 XPB XPBC	HP:0000002	Abnormality of body height
2072	ERCC4 ERCC11 XPF	HP:0000002	Abnormality of body height
2073	ERCC5 ERCM2 XPG XPGC	HP:0000002	Abnormality of body height
2074	ERCC6	HP:0000002	Abnormality of body height
2074	ERCC6	HP:0000002	Abnormality of body height
2077	ERF	HP:0000002	Abnormality of body height
2099	ESR1 ESR NR3A1	HP:0000002	Abnormality of body height
2121	EVC	HP:0000002	Abnormality of body height
2131	EXT1	HP:0000002	Abnormality of body height
2132	EXT2	HP:0000002	Abnormality of body height
2137	EXTL3 EXTL1L EXTR1 KIAA0519	HP:0000002	Abnormality of body height
2138	EYA1	HP:0000002	Abnormality of body height
2146	EZH2 KMT6	HP:0000002	Abnormality of body height
2175	FANCA FAA FACA FANCH	HP:0000002	Abnormality of body height
2176	FANCC FAC FACC	HP:0000002	Abnormality of body height
2177	FANCD2 FACD	HP:0000002	Abnormality of body height
2178	FANCE FACE	HP:0000002	Abnormality of body height
2186	BPTF FAC1 FALZ	HP:0000002	Abnormality of body height
2187	FANCB	HP:0000002	Abnormality of body height
2188	FANCF	HP:0000002	Abnormality of body height
2189	FANCG XRCC9	HP:0000002	Abnormality of body height
2200	FBN1 FBN	HP:0000002	Abnormality of body height
2201	FBN2	HP:0000002	Abnormality of body height
2239	GPC4 UNQ474/PRO937	HP:0000002	Abnormality of body height
2245	FGD1 FGDY ZFYVE3	HP:0000002	Abnormality of body height
2248	FGF3 INT2	HP:0000002	Abnormality of body height
2253	FGF8 AIGF	HP:0000002	Abnormality of body height
2257	FGF12 FGF12B FHF1	HP:0000002	Abnormality of body height
2260	FGFR1 BFGFR CEK FGFBR FLG FLT2 HBGFR	HP:0000002	Abnormality of body height
2261	FGFR3 JTK4	HP:0000002	Abnormality of body height
2263	FGFR2 BEK KGFR KSAM	HP:0000002	Abnormality of body height
2301	FOXE3 FKHL12 FREAC8	HP:0000002	Abnormality of body height
2304	FOXE1 FKHL15 FOXE2 TITF2 TTF2	HP:0000002	Abnormality of body height
2313	FLI1	HP:0000002	Abnormality of body height
2314	FLII FLIL	HP:0000002	Abnormality of body height
2316	FLNA FLN FLN1	HP:0000002	Abnormality of body height
2317	FLNB FLN1L FLN3 TABP TAP	HP:0000002	Abnormality of body height
2332	FMR1	HP:0000002	Abnormality of body height
2334	AFF2 FMR2 OX19	HP:0000002	Abnormality of body height
2475	MTOR FRAP FRAP1 FRAP2 RAFT1 RAPT1	HP:0000002	Abnormality of body height
2492	FSHR LGR1	HP:0000002	Abnormality of body height
2516	NR5A1 AD4BP FTZF1 SF1	HP:0000002	Abnormality of body height
2517	FUCA1 Nbla10230	HP:0000002	Abnormality of body height
2530	FUT8	HP:0000002	Abnormality of body height
2531	KDSR FVT1 SDR35C1	HP:0000002	Abnormality of body height
2535	FZD2	HP:0000002	Abnormality of body height
2538	G6PC1 G6PC G6PT	HP:0000002	Abnormality of body height
2542	SLC37A4 G6PT G6PT1 PRO0685 TRG19	HP:0000002	Abnormality of body height
2561	GABRB2	HP:0000002	Abnormality of body height
2563	GABRD	HP:0000002	Abnormality of body height
2588	GALNS	HP:0000002	Abnormality of body height
2619	GAS1	HP:0000002	Abnormality of body height
2623	GATA1 ERYF1 GF1	HP:0000002	Abnormality of body height
2626	GATA4	HP:0000002	Abnormality of body height
2629	GBA GC GLUC	HP:0000002	Abnormality of body height
2668	GDNF	HP:0000002	Abnormality of body height
2688	GH1	HP:0000002	Abnormality of body height
2690	GHR	HP:0000002	Abnormality of body height
2693	GHSR	HP:0000002	Abnormality of body height
2697	GJA1 GJAL	HP:0000002	Abnormality of body height
2706	GJB2	HP:0000002	Abnormality of body height
2707	GJB3 CX31	HP:0000002	Abnormality of body height
2710	GK	HP:0000002	Abnormality of body height
2717	GLA	HP:0000002	Abnormality of body height
2719	GPC3 OCI5	HP:0000002	Abnormality of body height
2720	GLB1 ELNR1	HP:0000002	Abnormality of body height
2733	GLE1 GLE1L	HP:0000002	Abnormality of body height
2735	GLI1 GLI	HP:0000002	Abnormality of body height
2736	GLI2 THP	HP:0000002	Abnormality of body height
2737	GLI3	HP:0000002	Abnormality of body height
2760	GM2A	HP:0000002	Abnormality of body height
2778	GNAS GNAS1	HP:0000002	Abnormality of body height
2796	GNRH1 GNRH GRH LHRH	HP:0000002	Abnormality of body height
2798	GNRHR GRHR	HP:0000002	Abnormality of body height
2812	GP1BB	HP:0000002	Abnormality of body height
2819	GPD1	HP:0000002	Abnormality of body height
2892	GRIA3 GLUR3 GLURC	HP:0000002	Abnormality of body height
2893	GRIA4 GLUR4	HP:0000002	Abnormality of body height
2906	GRIN2D GluN2D NMDAR2D	HP:0000002	Abnormality of body height
2911	GRM1 GPRC1A MGLUR1	HP:0000002	Abnormality of body height
2961	GTF2E2 TF2E2	HP:0000002	Abnormality of body height
2969	GTF2I BAP135 WBSCR6	HP:0000002	Abnormality of body height
2972	BRF1 BRF GTF3B TAF3B2 TAF3C	HP:0000002	Abnormality of body height
2990	GUSB	HP:0000002	Abnormality of body height
2998	GYS2	HP:0000002	Abnormality of body height
3033	HADH HAD HAD1 HADHSC SCHAD	HP:0000002	Abnormality of body height
3052	HCCS CCHL	HP:0000002	Abnormality of body height
3054	HCFC1 HCF1 HFC1	HP:0000002	Abnormality of body height
3070	HELLS PASG SMARCA6 Nbla10143	HP:0000002	Abnormality of body height
3149	HMGB3 HMG2A HMG4	HP:0000002	Abnormality of body height
3172	HNF4A HNF4 NR2A1 TCF14	HP:0000002	Abnormality of body height
3178	HNRNPA1 HNRPA1	HP:0000002	Abnormality of body height
3181	HNRNPA2B1 HNRPA2B1	HP:0000002	Abnormality of body height
3188	HNRNPH2 FTP3 HNRPH2	HP:0000002	Abnormality of body height
3192	HNRNPU C1orf199 HNRPU SAFA U21.1	HP:0000002	Abnormality of body height
3239	HOXD13 HOX4I	HP:0000002	Abnormality of body height
3248	HPGD PGDH1 SDR36C1	HP:0000002	Abnormality of body height
3251	HPRT1 HPRT	HP:0000002	Abnormality of body height
3265	HRAS HRAS1	HP:0000002	Abnormality of body height
3291	HSD11B2 HSD11K SDR9C3	HP:0000002	Abnormality of body height
3295	HSD17B4 EDH17B4 SDR8C1	HP:0000002	Abnormality of body height
3313	HSPA9 GRP75 HSPA9B mt-HSP70	HP:0000002	Abnormality of body height
3339	HSPG2	HP:0000002	Abnormality of body height
3373	HYAL1 LUCA1	HP:0000002	Abnormality of body height
3417	IDH1 PICD	HP:0000002	Abnormality of body height
3418	IDH2	HP:0000002	Abnormality of body height
3423	IDS SIDS	HP:0000002	Abnormality of body height
3425	IDUA	HP:0000002	Abnormality of body height
3476	IGBP1 IBP1	HP:0000002	Abnormality of body height
3479	IGF1 IBP1	HP:0000002	Abnormality of body height
3480	IGF1R	HP:0000002	Abnormality of body height
3481	IGF2 PP1446	HP:0000002	Abnormality of body height
3549	IHH	HP:0000002	Abnormality of body height
3636	INPPL1 SHIP2	HP:0000002	Abnormality of body height
3643	INSR	HP:0000002	Abnormality of body height
3679	ITGA7 UNQ406/PRO768	HP:0000002	Abnormality of body height
3694	ITGB6	HP:0000002	Abnormality of body height
3730	ANOS1 ADMLX KAL KAL1 KALIG1	HP:0000002	Abnormality of body height
3737	KCNA2	HP:0000002	Abnormality of body height
3739	KCNA4 KCNA4L	HP:0000002	Abnormality of body height
3745	KCNB1	HP:0000002	Abnormality of body height
3748	KCNC3	HP:0000002	Abnormality of body height
3758	KCNJ1 ROMK1	HP:0000002	Abnormality of body height
3766	KCNJ10	HP:0000002	Abnormality of body height
3784	KCNQ1 KCNA8 KCNA9 KVLQT1	HP:0000002	Abnormality of body height
3814	KISS1 PP5098	HP:0000002	Abnormality of body height
3832	KIF11 EG5 KNSL1 TRIP5	HP:0000002	Abnormality of body height
3835	KIF22 KID KNSL4	HP:0000002	Abnormality of body height
3845	KRAS KRAS2 RASK2	HP:0000002	Abnormality of body height
3897	L1CAM CAML1 MIC5	HP:0000002	Abnormality of body height
3930	LBR	HP:0000002	Abnormality of body height
3954	LETM1	HP:0000002	Abnormality of body height
3955	LFNG	HP:0000002	Abnormality of body height
3973	LHCGR LCGR LGR2 LHRHR	HP:0000002	Abnormality of body height
3975	LHX1 LIM-1 LIM1	HP:0000002	Abnormality of body height
3977	LIFR	HP:0000002	Abnormality of body height
3981	LIG4	HP:0000002	Abnormality of body height
3984	LIMK1 LIMK	HP:0000002	Abnormality of body height
4000	LMNA LMN1	HP:0000002	Abnormality of body height
4010	LMX1B	HP:0000002	Abnormality of body height
4015	LOX	HP:0000002	Abnormality of body height
4038	LRP4 KIAA0816 LRP10 MEGF7	HP:0000002	Abnormality of body height
4041	LRP5 LR3 LRP7	HP:0000002	Abnormality of body height
4053	LTBP2 C14orf141 LTBP3	HP:0000002	Abnormality of body height
4054	LTBP3	HP:0000002	Abnormality of body height
4088	SMAD3 MADH3	HP:0000002	Abnormality of body height
4089	SMAD4 DPC4 MADH4	HP:0000002	Abnormality of body height
4094	MAF	HP:0000002	Abnormality of body height
4144	MAT2A AMS2 MATA2	HP:0000002	Abnormality of body height
4148	MATN3	HP:0000002	Abnormality of body height
4158	MC2R ACTHR	HP:0000002	Abnormality of body height
4204	MECP2	HP:0000002	Abnormality of body height
4212	MEIS2 MRG1	HP:0000002	Abnormality of body height
4247	MGAT2	HP:0000002	Abnormality of body height
4297	KMT2A ALL1 CXXC7 HRX HTRX MLL MLL1 TRX1	HP:0000002	Abnormality of body height
4313	MMP2 CLG4A	HP:0000002	Abnormality of body height
4318	MMP9 CLG4B	HP:0000002	Abnormality of body height
4322	MMP13	HP:0000002	Abnormality of body height
4352	MPL TPOR	HP:0000002	Abnormality of body height
4358	MPV17	HP:0000002	Abnormality of body height
4361	MRE11 HNGS1 MRE11A	HP:0000002	Abnormality of body height
4508	MT-ATP6 ATP6 ATPASE6 MTATP6	HP:0000002	Abnormality of body height
4512	MT-CO1 COI COXI MTCO1	HP:0000002	Abnormality of body height
4513	MT-CO2 COII COX2 COXII MTCO2	HP:0000002	Abnormality of body height
4514	MT-CO3 COIII COXIII MTCO3	HP:0000002	Abnormality of body height
4534	MTM1 CG2	HP:0000002	Abnormality of body height
4535	MT-ND1 MTND1 NADH1 ND1	HP:0000002	Abnormality of body height
4538	MT-ND4 MTND4 NADH4 ND4	HP:0000002	Abnormality of body height
4540	MT-ND5 MTND5 NADH5 ND5	HP:0000002	Abnormality of body height
4541	MT-ND6 MTND6 NADH6 ND6	HP:0000002	Abnormality of body height
4591	TRIM37 KIAA0898 MUL POB1	HP:0000002	Abnormality of body height
4598	MVK	HP:0000002	Abnormality of body height
4621	MYH3	HP:0000002	Abnormality of body height
4625	MYH7 MYHCB	HP:0000002	Abnormality of body height
4626	MYH8	HP:0000002	Abnormality of body height
4629	MYH11 KIAA0866	HP:0000002	Abnormality of body height
4633	MYL2 MLC2	HP:0000002	Abnormality of body height
4638	MYLK MLCK MLCK1 MYLK1	HP:0000002	Abnormality of body height
4683	NBN NBS NBS1 P95	HP:0000002	Abnormality of body height
4692	NDN	HP:0000002	Abnormality of body height
4750	NEK1 KIAA1901	HP:0000002	Abnormality of body height
4758	NEU1 NANH	HP:0000002	Abnormality of body height
4763	NF1	HP:0000002	Abnormality of body height
4780	NFE2L2 NRF2	HP:0000002	Abnormality of body height
4784	NFIX	HP:0000002	Abnormality of body height
4838	NODAL	HP:0000002	Abnormality of body height
4841	NONO NRB54	HP:0000002	Abnormality of body height
4853	NOTCH2	HP:0000002	Abnormality of body height
4854	NOTCH3	HP:0000002	Abnormality of body height
4867	NPHP1 NPH1	HP:0000002	Abnormality of body height
4882	NPR2 ANPRB	HP:0000002	Abnormality of body height
4893	NRAS HRAS1	HP:0000002	Abnormality of body height
4902	NRTN	HP:0000002	Abnormality of body height
4915	NTRK2 TRKB	HP:0000002	Abnormality of body height
4920	ROR2 NTRKR2	HP:0000002	Abnormality of body height
4921	DDR2 NTRKR3 TKT TYRO10	HP:0000002	Abnormality of body height
4952	OCRL OCRL1	HP:0000002	Abnormality of body height
4967	OGDH	HP:0000002	Abnormality of body height
4982	TNFRSF11B OCIF OPG	HP:0000002	Abnormality of body height
4990	SIX6 OPTX2 SIX9	HP:0000002	Abnormality of body height
4998	ORC1 ORC1L PARC1	HP:0000002	Abnormality of body height
5000	ORC4 ORC4L	HP:0000002	Abnormality of body height
5015	OTX2	HP:0000002	Abnormality of body height
5034	P4HB ERBA2L PDI PDIA1 PO4DB	HP:0000002	Abnormality of body height
5048	PAFAH1B1 LIS1 MDCR MDS PAFAHA	HP:0000002	Abnormality of body height
5073	PARN DAN	HP:0000002	Abnormality of body height
5075	PAX1 HUP48	HP:0000002	Abnormality of body height
5080	PAX6 AN2	HP:0000002	Abnormality of body height
5095	PCCA	HP:0000002	Abnormality of body height
5096	PCCB	HP:0000002	Abnormality of body height
5111	PCNA	HP:0000002	Abnormality of body height
5116	PCNT KIAA0402 PCNT2	HP:0000002	Abnormality of body height
5130	PCYT1A CTPCT PCYT1	HP:0000002	Abnormality of body height
5139	PDE3A	HP:0000002	Abnormality of body height
5144	PDE4D DPDE3	HP:0000002	Abnormality of body height
5147	PDE6D PDED	HP:0000002	Abnormality of body height
5159	PDGFRB PDGFR PDGFR1	HP:0000002	Abnormality of body height
5167	ENPP1 M6S1 NPPS PC1 PDNP1	HP:0000002	Abnormality of body height
5172	SLC26A4 PDS	HP:0000002	Abnormality of body height
5189	PEX1	HP:0000002	Abnormality of body height
5190	PEX6 PXAAA1	HP:0000002	Abnormality of body height
5191	PEX7 PTS2R	HP:0000002	Abnormality of body height
5192	PEX10 RNF69	HP:0000002	Abnormality of body height
5193	PEX12 PAF3	HP:0000002	Abnormality of body height
5194	PEX13	HP:0000002	Abnormality of body height
5195	PEX14	HP:0000002	Abnormality of body height
5205	ATP8B1 ATPIC FIC1 PFIC	HP:0000002	Abnormality of body height
5236	PGM1	HP:0000002	Abnormality of body height
5251	PHEX PEX	HP:0000002	Abnormality of body height
5257	PHKB	HP:0000002	Abnormality of body height
5277	PIGA	HP:0000002	Abnormality of body height
5286	PIK3C2A	HP:0000002	Abnormality of body height
5290	PIK3CA	HP:0000002	Abnormality of body height
5295	PIK3R1 GRB1	HP:0000002	Abnormality of body height
5339	PLEC PLEC1	HP:0000002	Abnormality of body height
5351	PLOD1 LLH PLOD	HP:0000002	Abnormality of body height
5352	PLOD2	HP:0000002	Abnormality of body height
5354	PLP1 PLP	HP:0000002	Abnormality of body height
5426	POLE POLE1	HP:0000002	Abnormality of body height
5428	POLG MDP1 POLG1 POLGA	HP:0000002	Abnormality of body height
5447	POR CYPOR	HP:0000002	Abnormality of body height
5449	POU1F1 GHF1 PIT1	HP:0000002	Abnormality of body height
5476	CTSA PPGB	HP:0000002	Abnormality of body height
5479	PPIB CYPB	HP:0000002	Abnormality of body height
5500	PPP1CB	HP:0000002	Abnormality of body height
5530	PPP3CA CALNA CNA	HP:0000002	Abnormality of body height
5566	PRKACA PKACA	HP:0000002	Abnormality of body height
5573	PRKAR1A PKR1 PRKAR1 TSE1	HP:0000002	Abnormality of body height
5592	PRKG1 PRKG1B PRKGR1A PRKGR1B	HP:0000002	Abnormality of body height
5594	MAPK1 ERK2 PRKM1 PRKM2	HP:0000002	Abnormality of body height
5604	MAP2K1 MEK1 PRKMK1	HP:0000002	Abnormality of body height
5605	MAP2K2 MEK2 MKK2 PRKMK2	HP:0000002	Abnormality of body height
5611	DNAJC3 P58IPK PRKRI	HP:0000002	Abnormality of body height
5626	PROP1	HP:0000002	Abnormality of body height
5696	PSMB8 LMP7 PSMB5i RING10 Y2	HP:0000002	Abnormality of body height
5727	PTCH1 PTCH	HP:0000002	Abnormality of body height
5728	PTEN MMAC1 TEP1	HP:0000002	Abnormality of body height
5744	PTHLH PTHRP	HP:0000002	Abnormality of body height
5745	PTH1R PTHR PTHR1	HP:0000002	Abnormality of body height
5781	PTPN11 PTP2C SHPTP2	HP:0000002	Abnormality of body height
5824	PEX19 HK33 PXF OK/SW-cl.22	HP:0000002	Abnormality of body height
5828	PEX2 PAF1 PMP3 PMP35 PXMP3 RNF72	HP:0000002	Abnormality of body height
5830	PEX5 PXR1	HP:0000002	Abnormality of body height
5831	PYCR1	HP:0000002	Abnormality of body height
5832	ALDH18A1 GSAS P5CS PYCS	HP:0000002	Abnormality of body height
5836	PYGL	HP:0000002	Abnormality of body height
5885	RAD21 HR21 KIAA0078 NXP1 SCC1	HP:0000002	Abnormality of body height
5889	RAD51C RAD51L2	HP:0000002	Abnormality of body height
5894	RAF1 RAF	HP:0000002	Abnormality of body height
5906	RAP1A KREV1	HP:0000002	Abnormality of body height
5908	RAP1B OK/SW-cl.11	HP:0000002	Abnormality of body height
5922	RASA2 GAP1M RASGAP	HP:0000002	Abnormality of body height
5925	RB1	HP:0000002	Abnormality of body height
5932	RBBP8 CTIP	HP:0000002	Abnormality of body height
5977	DPF2 BAF45D REQ UBID4	HP:0000002	Abnormality of body height
5979	RET CDHF12 CDHR16 PTC RET51	HP:0000002	Abnormality of body height
5982	RFC2	HP:0000002	Abnormality of body height
6016	RIT1 RIBB RIT ROC1	HP:0000002	Abnormality of body height
6091	ROBO1 DUTT1	HP:0000002	Abnormality of body height
6125	RPL5 MSTP030	HP:0000002	Abnormality of body height
6134	RPL10 DXS648E QM	HP:0000002	Abnormality of body height
6135	RPL11	HP:0000002	Abnormality of body height
6138	RPL15 EC45 TCBAP0781	HP:0000002	Abnormality of body height
6141	RPL18	HP:0000002	Abnormality of body height
6154	RPL26	HP:0000002	Abnormality of body height
6155	RPL27	HP:0000002	Abnormality of body height
6165	RPL35A GIG33	HP:0000002	Abnormality of body height
6197	RPS6KA3 ISPK1 MAPKAPK1B RSK2	HP:0000002	Abnormality of body height
6201	RPS7	HP:0000002	Abnormality of body height
6204	RPS10	HP:0000002	Abnormality of body height
6210	RPS15A OK/SW-cl.82	HP:0000002	Abnormality of body height
6218	RPS17 RPS17L	HP:0000002	Abnormality of body height
6223	RPS19	HP:0000002	Abnormality of body height
6228	RPS23	HP:0000002	Abnormality of body height
6229	RPS24	HP:0000002	Abnormality of body height
6231	RPS26	HP:0000002	Abnormality of body height
6232	RPS27 MPS1	HP:0000002	Abnormality of body height
6234	RPS28	HP:0000002	Abnormality of body height
6235	RPS29	HP:0000002	Abnormality of body height
6237	RRAS	HP:0000002	Abnormality of body height
6239	RREB1 FINB	HP:0000002	Abnormality of body height
6299	SALL1 SAL1 ZNF794	HP:0000002	Abnormality of body height
6301	SARS1 SARS SERS	HP:0000002	Abnormality of body height
6307	MSMO1 DESP4 ERG25 SC4MOL	HP:0000002	Abnormality of body height
6328	SCN3A KIAA1356 NAC3	HP:0000002	Abnormality of body height
6329	SCN4A	HP:0000002	Abnormality of body height
6334	SCN8A MED	HP:0000002	Abnormality of body height
6389	SDHA SDH2 SDHF	HP:0000002	Abnormality of body height
6390	SDHB SDH SDH1	HP:0000002	Abnormality of body height
6391	SDHC CYB560 SDH3	HP:0000002	Abnormality of body height
6392	SDHD SDH4	HP:0000002	Abnormality of body height
6399	TRAPPC2 SEDL	HP:0000002	Abnormality of body height
6469	SHH	HP:0000002	Abnormality of body height
6473	SHOX PHOG	HP:0000002	Abnormality of body height
6491	STIL SIL	HP:0000002	Abnormality of body height
6492	SIM1 BHLHE14	HP:0000002	Abnormality of body height
6496	SIX3	HP:0000002	Abnormality of body height
6497	SKI	HP:0000002	Abnormality of body height
6506	SLC1A2 EAAT2 GLT1	HP:0000002	Abnormality of body height
6513	SLC2A1 GLUT1	HP:0000002	Abnormality of body height
6521	SLC4A1 AE1 DI EPB3	HP:0000002	Abnormality of body height
6528	SLC5A5 NIS	HP:0000002	Abnormality of body height
6535	SLC6A8	HP:0000002	Abnormality of body height
6548	SLC9A1 APNH1 NHE1	HP:0000002	Abnormality of body height
6557	SLC12A1 NKCC2	HP:0000002	Abnormality of body height
6569	SLC34A1 NPT2 SLC17A2	HP:0000002	Abnormality of body height
6595	SMARCA2 BAF190B BRM SNF2A SNF2L2	HP:0000002	Abnormality of body height
6597	SMARCA4 BAF190A BRG1 SNF2B SNF2L4	HP:0000002	Abnormality of body height
6598	SMARCB1 BAF47 INI1 SNF5L1	HP:0000002	Abnormality of body height
6601	SMARCC2 BAF170	HP:0000002	Abnormality of body height
6605	SMARCE1 BAF57	HP:0000002	Abnormality of body height
6609	SMPD1 ASM	HP:0000002	Abnormality of body height
6611	SMS	HP:0000002	Abnormality of body height
6628	SNRPB COD SNRPB1	HP:0000002	Abnormality of body height
6638	SNRPN HCERN3 SMN	HP:0000002	Abnormality of body height
6651	SON C21orf50 DBP5 KIAA1019 NREBP HSPC310 HSPC312	HP:0000002	Abnormality of body height
6654	SOS1	HP:0000002	Abnormality of body height
6655	SOS2	HP:0000002	Abnormality of body height
6657	SOX2	HP:0000002	Abnormality of body height
6658	SOX3	HP:0000002	Abnormality of body height
6662	SOX9	HP:0000002	Abnormality of body height
6664	SOX11	HP:0000002	Abnormality of body height
6678	SPARC ON	HP:0000002	Abnormality of body height
6729	SRP54	HP:0000002	Abnormality of body height
6770	STAR STARD1	HP:0000002	Abnormality of body height
6772	STAT1	HP:0000002	Abnormality of body height
6774	STAT3 APRF	HP:0000002	Abnormality of body height
6777	STAT5B	HP:0000002	Abnormality of body height
6786	STIM1 GOK	HP:0000002	Abnormality of body height
6812	STXBP1 UNC18A	HP:0000002	Abnormality of body height
6820	SULT2B1 HSST2	HP:0000002	Abnormality of body height
6866	TAC3 NKNB UNQ585/PRO1155	HP:0000002	Abnormality of body height
6870	TACR3 NK3R TAC3R	HP:0000002	Abnormality of body height
6878	TAF6 TAF2E TAFII70	HP:0000002	Abnormality of body height
6884	TAF13 TAF2K TAFII18	HP:0000002	Abnormality of body height
6885	MAP3K7 TAK1	HP:0000002	Abnormality of body height
6899	TBX1	HP:0000002	Abnormality of body height
6905	TBCE	HP:0000002	Abnormality of body height
6909	TBX2	HP:0000002	Abnormality of body height
6911	TBX6	HP:0000002	Abnormality of body height
6913	TBX15 TBX14	HP:0000002	Abnormality of body height
6926	TBX3	HP:0000002	Abnormality of body height
6928	HNF1B TCF2	HP:0000002	Abnormality of body height
6997	TDGF1 CRIPTO	HP:0000002	Abnormality of body height
7015	TERT EST2 TCS1 TRT	HP:0000002	Abnormality of body height
7020	TFAP2A AP2TF TFAP2	HP:0000002	Abnormality of body height
7038	TG	HP:0000002	Abnormality of body height
7042	TGFB2	HP:0000002	Abnormality of body height
7043	TGFB3	HP:0000002	Abnormality of body height
7046	TGFBR1 ALK5 SKR4	HP:0000002	Abnormality of body height
7048	TGFBR2	HP:0000002	Abnormality of body height
7050	TGIF1 TGIF	HP:0000002	Abnormality of body height
7051	TGM1 KTG	HP:0000002	Abnormality of body height
7080	NKX2-1 NKX2A TITF1 TTF1	HP:0000002	Abnormality of body height
7086	TKT	HP:0000002	Abnormality of body height
7136	TNNI2	HP:0000002	Abnormality of body height
7140	TNNT3	HP:0000002	Abnormality of body height
7156	TOP3A TOP3	HP:0000002	Abnormality of body height
7157	TP53 P53	HP:0000002	Abnormality of body height
7170	TPM3	HP:0000002	Abnormality of body height
7173	TPO	HP:0000002	Abnormality of body height
7200	TRH	HP:0000002	Abnormality of body height
7227	TRPS1	HP:0000002	Abnormality of body height
7253	TSHR LGR3	HP:0000002	Abnormality of body height
7273	TTN	HP:0000002	Abnormality of body height
7290	HIRA DGCR1 HIR TUPLE1	HP:0000002	Abnormality of body height
7291	TWIST1 BHLHA38 TWIST	HP:0000002	Abnormality of body height
7337	UBE3A E6AP EPVE6AP HPVE6A	HP:0000002	Abnormality of body height
7353	UFD1 UFD1L	HP:0000002	Abnormality of body height
7390	UROS	HP:0000002	Abnormality of body height
7403	KDM6A UTX	HP:0000002	Abnormality of body height
7415	VCP	HP:0000002	Abnormality of body height
7421	VDR NR1I1	HP:0000002	Abnormality of body height
7436	VLDLR	HP:0000002	Abnormality of body height
7461	CLIP2 CYLN2 KIAA0291 WBSCR3 WBSCR4 WSCR4	HP:0000002	Abnormality of body height
7468	NSD2 KIAA1090 MMSET TRX5 WHSC1	HP:0000002	Abnormality of body height
7469	NELFA WHSC2 P/OKcl.15	HP:0000002	Abnormality of body height
7471	WNT1 INT1	HP:0000002	Abnormality of body height
7474	WNT5A	HP:0000002	Abnormality of body height
7476	WNT7A	HP:0000002	Abnormality of body height
7486	WRN RECQ3 RECQL2	HP:0000002	Abnormality of body height
7490	WT1	HP:0000002	Abnormality of body height
7507	XPA XPAC	HP:0000002	Abnormality of body height
7508	XPC XPCC	HP:0000002	Abnormality of body height
7516	XRCC2	HP:0000002	Abnormality of body height
7518	XRCC4	HP:0000002	Abnormality of body height
7531	YWHAE	HP:0000002	Abnormality of body height
7532	YWHAG	HP:0000002	Abnormality of body height
7546	ZIC2	HP:0000002	Abnormality of body height
7681	MKRN3 D15S9 RNF63 ZNF127	HP:0000002	Abnormality of body height
7704	ZBTB16 PLZF ZNF145	HP:0000002	Abnormality of body height
7707	ZNF148 ZBP89	HP:0000002	Abnormality of body height
7737	RNF113A RNF113 ZNF183	HP:0000002	Abnormality of body height
7840	ALMS1 KIAA0328	HP:0000002	Abnormality of body height
7849	PAX8	HP:0000002	Abnormality of body height
7862	BRPF1 BR140	HP:0000002	Abnormality of body height
7965	AIMP2 JTV1 PRO0992	HP:0000002	Abnormality of body height
7994	KAT6A MOZ MYST3 RUNXBP2 ZNF220	HP:0000002	Abnormality of body height
8022	LHX3	HP:0000002	Abnormality of body height
8036	SHOC2 KIAA0862	HP:0000002	Abnormality of body height
8074	FGF23 HYPF UNQ3027/PRO9828	HP:0000002	Abnormality of body height
8076	MFAP5 MAGP2	HP:0000002	Abnormality of body height
8085	KMT2D ALR MLL2 MLL4	HP:0000002	Abnormality of body height
8086	AAAS ADRACALA GL003	HP:0000002	Abnormality of body height
8091	HMGA2 HMGIC	HP:0000002	Abnormality of body height
8120	AP3B2	HP:0000002	Abnormality of body height
8192	CLPP	HP:0000002	Abnormality of body height
8195	MKKS BBS6	HP:0000002	Abnormality of body height
8200	GDF5 BMP14 CDMP1	HP:0000002	Abnormality of body height
8214	DGCR6	HP:0000002	Abnormality of body height
8216	LZTR1 TCFL2	HP:0000002	Abnormality of body height
8220	ESS2 DGCR13 DGCR14 DGSH DGSI ES2	HP:0000002	Abnormality of body height
8239	USP9X DFFRX FAM USP9	HP:0000002	Abnormality of body height
8242	KDM5C DXS1272E JARID1C SMCX XE169	HP:0000002	Abnormality of body height
8243	SMC1A DXS423E KIAA0178 SB1.8 SMC1 SMC1L1	HP:0000002	Abnormality of body height
8260	NAA10 ARD1 ARD1A TE2	HP:0000002	Abnormality of body height
8270	LAGE3 DXS9879E ESO3 ITBA2	HP:0000002	Abnormality of body height
8289	ARID1A BAF250 BAF250A C1orf4 OSA1 SMARCF1	HP:0000002	Abnormality of body height
8318	CDC45 CDC45L CDC45L2 UNQ374/PRO710	HP:0000002	Abnormality of body height
8443	GNPAT DAPAT DHAPAT	HP:0000002	Abnormality of body height
8450	CUL4B KIAA0695	HP:0000002	Abnormality of body height
8481	OFD1 CXorf5	HP:0000002	Abnormality of body height
8493	PPM1D WIP1	HP:0000002	Abnormality of body height
8504	PEX3	HP:0000002	Abnormality of body height
8514	KCNAB2 KCNA2B KCNK2	HP:0000002	Abnormality of body height
8517	IKBKG FIP3 NEMO	HP:0000002	Abnormality of body height
8540	AGPS AAG5	HP:0000002	Abnormality of body height
8558	CDK10	HP:0000002	Abnormality of body height
8573	CASK LIN2	HP:0000002	Abnormality of body height
8622	PDE8B PIG22	HP:0000002	Abnormality of body height
8626	TP63 KET P63 P73H P73L TP73L	HP:0000002	Abnormality of body height
8647	ABCB11 BSEP	HP:0000002	Abnormality of body height
8675	STX16	HP:0000002	Abnormality of body height
8726	EED	HP:0000002	Abnormality of body height
8792	TNFRSF11A RANK	HP:0000002	Abnormality of body height
8799	PEX11B	HP:0000002	Abnormality of body height
8803	SUCLA2	HP:0000002	Abnormality of body height
8815	BANF1 BAF BCRG1	HP:0000002	Abnormality of body height
8820	HESX1 HANF	HP:0000002	Abnormality of body height
8822	FGF17 UNQ161/PRO187	HP:0000002	Abnormality of body height
8831	SYNGAP1 KIAA1938	HP:0000002	Abnormality of body height
8838	CCN6 WISP3 UNQ462/PRO790/PRO956	HP:0000002	Abnormality of body height
8867	SYNJ1 KIAA0910	HP:0000002	Abnormality of body height
8888	MCM3AP GANP KIAA0572 MAP80	HP:0000002	Abnormality of body height
8905	AP1S2 DC22	HP:0000002	Abnormality of body height
8924	HERC2	HP:0000002	Abnormality of body height
8925	HERC1	HP:0000002	Abnormality of body height
8928	FOXH1 FAST1 FAST2	HP:0000002	Abnormality of body height
8942	KYNU	HP:0000002	Abnormality of body height
9031	BAZ1B WBSC10 WBSCR10 WBSCR9 WSTF	HP:0000002	Abnormality of body height
9037	SEMA5A SEMAF	HP:0000002	Abnormality of body height
9049	AIP XAP2	HP:0000002	Abnormality of body height
9056	SLC7A7	HP:0000002	Abnormality of body height
9060	PAPSS2 ATPSK2	HP:0000002	Abnormality of body height
9126	SMC3 BAM BMH CSPG6 SMC3L1	HP:0000002	Abnormality of body height
9150	CTDP1 FCP1	HP:0000002	Abnormality of body height
9158	FIBP	HP:0000002	Abnormality of body height
9179	AP4M1 MUARP2	HP:0000002	Abnormality of body height
9184	BUB3	HP:0000002	Abnormality of body height
9200	HACD1 PTPLA	HP:0000002	Abnormality of body height
9210	BMP15 GDF9B	HP:0000002	Abnormality of body height
9215	LARGE1 KIAA0609 LARGE	HP:0000002	Abnormality of body height
9241	NOG	HP:0000002	Abnormality of body height
9276	COPB2	HP:0000002	Abnormality of body height
9319	TRIP13 PCH2	HP:0000002	Abnormality of body height
9321	TRIP11 CEV14	HP:0000002	Abnormality of body height
9342	SNAP29	HP:0000002	Abnormality of body height
9343	EFTUD2 KIAA0031 SNRP116	HP:0000002	Abnormality of body height
9361	LONP1 PRSS15	HP:0000002	Abnormality of body height
9382	COG1 KIAA1381 LDLB	HP:0000002	Abnormality of body height
9394	HS6ST1 HS6ST	HP:0000002	Abnormality of body height
9401	RECQL4 RECQ4	HP:0000002	Abnormality of body height
9409	PEX16	HP:0000002	Abnormality of body height
9419	CRIPT HSPC139	HP:0000002	Abnormality of body height
9427	ECEL1 XCE UNQ2431/PRO4991	HP:0000002	Abnormality of body height
9451	EIF2AK3 PEK PERK	HP:0000002	Abnormality of body height
9469	CHST3	HP:0000002	Abnormality of body height
9487	PIGL	HP:0000002	Abnormality of body height
9493	KIF23 KNSL5 MKLP1	HP:0000002	Abnormality of body height
9496	TBX4	HP:0000002	Abnormality of body height
9509	ADAMTS2 PCINP PCPNI	HP:0000002	Abnormality of body height
9569	GTF2IRD1 CREAM1 GTF3 MUSTRD1 RBAP2 WBSCR11 WBSCR12	HP:0000002	Abnormality of body height
9581	PREPL KIAA0436	HP:0000002	Abnormality of body height
9632	SEC24C KIAA0079	HP:0000002	Abnormality of body height
9652	TTC37 KIAA0372	HP:0000002	Abnormality of body height
9657	IQCB1 KIAA0036 NPHP5 OK/SW-cl.85	HP:0000002	Abnormality of body height
9662	CEP135 CEP4 KIAA0635	HP:0000002	Abnormality of body height
9698	PUM1 KIAA0099 PUMH1	HP:0000002	Abnormality of body height
9702	CEP57 KIAA0092 TSP57	HP:0000002	Abnormality of body height
9719	ADAMTSL2 KIAA0605	HP:0000002	Abnormality of body height
9723	SEMA3E KIAA0331 SEMAH	HP:0000002	Abnormality of body height
9742	IFT140 KIAA0590 WDTC2	HP:0000002	Abnormality of body height
9757	KMT2B HRX2 KIAA0304 MLL2 MLL4 TRX2 WBP7	HP:0000002	Abnormality of body height
9759	HDAC4 KIAA0288	HP:0000002	Abnormality of body height
9775	EIF4A3 DDX48 KIAA0111	HP:0000002	Abnormality of body height
9780	PIEZO1 FAM38A KIAA0233	HP:0000002	Abnormality of body height
9786	KIAA0586 TALPID3	HP:0000002	Abnormality of body height
9791	PTDSS1 KIAA0024 PSSA	HP:0000002	Abnormality of body height
9820	CUL7 KIAA0076	HP:0000002	Abnormality of body height
9837	GINS1 KIAA0186 PSF1	HP:0000002	Abnormality of body height
9839	ZEB2 KIAA0569 SIP1 ZFHX1B ZFX1B HRIHFB2411	HP:0000002	Abnormality of body height
9841	ZBTB24 KIAA0441 ZNF450	HP:0000002	Abnormality of body height
9851	KIAA0753 MNR OFIP	HP:0000002	Abnormality of body height
9871	SEC24D KIAA0755	HP:0000002	Abnormality of body height
9895	TECPR2 KIAA0297 KIAA0329	HP:0000002	Abnormality of body height
9896	FIG4 KIAA0274 SAC3	HP:0000002	Abnormality of body height
9897	WASHC5 KIAA0196	HP:0000002	Abnormality of body height
9915	ARNT2 BHLHE1 KIAA0307	HP:0000002	Abnormality of body height
9918	NCAPD2 CAPD2 CNAP1 KIAA0159	HP:0000002	Abnormality of body height
9928	KIF14 KIAA0042	HP:0000002	Abnormality of body height
9939	RBM8A RBM8 HSPC114 MDS014	HP:0000002	Abnormality of body height
9949	AMMECR1	HP:0000002	Abnormality of body height
9968	MED12 ARC240 CAGH45 HOPA KIAA0192 TNRC11 TRAP230	HP:0000002	Abnormality of body height
9993	DGCR2 IDD KIAA0163	HP:0000002	Abnormality of body height
10013	HDAC6 KIAA0901 JM21	HP:0000002	Abnormality of body height
10056	FARSB FARSLB FRSB HSPC173	HP:0000002	Abnormality of body height
10058	ABCB6 MTABC3 PRP UMAT	HP:0000002	Abnormality of body height
10082	GPC6 UNQ369/PRO705	HP:0000002	Abnormality of body height
10084	PQBP1 NPW38 JM26	HP:0000002	Abnormality of body height
10111	RAD50	HP:0000002	Abnormality of body height
10157	AASS	HP:0000002	Abnormality of body height
10225	CD96	HP:0000002	Abnormality of body height
10262	SF3B4 SAP49	HP:0000002	Abnormality of body height
10269	ZMPSTE24 FACE1 STE24	HP:0000002	Abnormality of body height
10283	CWC27 SDCCAG10 UNQ438/PRO871	HP:0000002	Abnormality of body height
10293	TRAIP RNF206 TRIP	HP:0000002	Abnormality of body height
10297	APC2 APCL	HP:0000002	Abnormality of body height
10324	KLHL41 KBTBD10 KRP1	HP:0000002	Abnormality of body height
10382	TUBB4A TUBB4 TUBB5	HP:0000002	Abnormality of body height
10436	EMG1 C2F	HP:0000002	Abnormality of body height
10459	MAD2L2 MAD2B REV7	HP:0000002	Abnormality of body height
10472	ZBTB18 RP58 TAZ1 ZNF238	HP:0000002	Abnormality of body height
10483	SEC23B	HP:0000002	Abnormality of body height
10484	SEC23A	HP:0000002	Abnormality of body height
10491	CRTAP CASP	HP:0000002	Abnormality of body height
10512	SEMA3C SEMAE	HP:0000002	Abnormality of body height
10516	FBLN5 DANCE UNQ184/PRO210	HP:0000002	Abnormality of body height
10522	DEAF1 SPN ZMYND5	HP:0000002	Abnormality of body height
10525	HYOU1 GRP170 ORP150	HP:0000002	Abnormality of body height
10535	RNASEH2A RNASEHI RNHIA	HP:0000002	Abnormality of body height
10555	AGPAT2	HP:0000002	Abnormality of body height
10560	SLC19A2 THT1 TRMA	HP:0000002	Abnormality of body height
10584	COLEC10 CLL1 UNQ366/PRO702	HP:0000002	Abnormality of body height
10586	MAB21L2	HP:0000002	Abnormality of body height
10588	MTHFS	HP:0000002	Abnormality of body height
10617	STAMBP AMSH	HP:0000002	Abnormality of body height
10661	KLF1 EKLF	HP:0000002	Abnormality of body height
10664	CTCF	HP:0000002	Abnormality of body height
10682	EBP	HP:0000002	Abnormality of body height
10683	DLL3	HP:0000002	Abnormality of body height
10717	AP4B1	HP:0000002	Abnormality of body height
10730	YME1L1 FTSH1 YME1L UNQ1868/PRO4304	HP:0000002	Abnormality of body height
10733	PLK4 SAK STK18	HP:0000002	Abnormality of body height
10735	STAG2 SA2	HP:0000002	Abnormality of body height
10736	SIX2	HP:0000002	Abnormality of body height
10743	RAI1 KIAA1820	HP:0000002	Abnormality of body height
10749	KIF1C KIAA0706	HP:0000002	Abnormality of body height
10785	WDR4	HP:0000002	Abnormality of body height
10801	SEPTIN9 KIAA0991 MSF SEPT9	HP:0000002	Abnormality of body height
10804	GJB6	HP:0000002	Abnormality of body height
10806	SDCCAG8 CCCAP NPHP10 HSPC085	HP:0000002	Abnormality of body height
10815	CPLX1	HP:0000002	Abnormality of body height
10847	SRCAP KIAA0309	HP:0000002	Abnormality of body height
10907	TXNL4A DIM1 TXNL4	HP:0000002	Abnormality of body height
10908	PNPLA6 NTE	HP:0000002	Abnormality of body height
10982	MAPRE2 RP1	HP:0000002	Abnormality of body height
11005	SPINK5	HP:0000002	Abnormality of body height
11011	TLK2	HP:0000002	Abnormality of body height
11020	IFT27 RABL4 RAYL	HP:0000002	Abnormality of body height
11113	CIT CRIK KIAA0949 STK21	HP:0000002	Abnormality of body height
11128	POLR3A	HP:0000002	Abnormality of body height
11154	AP4S1	HP:0000002	Abnormality of body height
11224	RPL35	HP:0000002	Abnormality of body height
11277	TREX1	HP:0000002	Abnormality of body height
11285	B4GALT7 XGALT1 UNQ748/PRO1478	HP:0000002	Abnormality of body height
22827	PUF60 FIR ROBPI SIAHBP1	HP:0000002	Abnormality of body height
22866	CNKSR2 CNK2 KIAA0902 KSR2	HP:0000002	Abnormality of body height
22897	CEP164 KIAA1052 NPHP15	HP:0000002	Abnormality of body height
22906	TRAK1 KIAA1042 OIP106	HP:0000002	Abnormality of body height
22930	RAB3GAP1 KIAA0066 RAB3GAP	HP:0000002	Abnormality of body height
22954	TRIM32 HT2A	HP:0000002	Abnormality of body height
22983	MAST1 KIAA0973 SAST	HP:0000002	Abnormality of body height
22995	CEP152 KIAA0912	HP:0000002	Abnormality of body height
23028	KDM1A AOF2 KDM1 KIAA0601 LSD1	HP:0000002	Abnormality of body height
23096	IQSEC2 KIAA0522	HP:0000002	Abnormality of body height
23111	SPART KIAA0610 SPG20 TAHCCP1	HP:0000002	Abnormality of body height
23118	TAB2 KIAA0733 MAP3K7IP2	HP:0000002	Abnormality of body height
23126	POGZ KIAA0461 SUHW5 ZNF280E ZNF635 Nbla00003	HP:0000002	Abnormality of body height
23141	ANKLE2 KIAA0692 LEM4	HP:0000002	Abnormality of body height
23169	SLC35D1 KIAA0260 UGTREL7	HP:0000002	Abnormality of body height
23203	PMPCA INPP5E KIAA0123 MPPA	HP:0000002	Abnormality of body height
23230	VPS13A CHAC KIAA0986	HP:0000002	Abnormality of body height
23247	KATNIP KIAA0556	HP:0000002	Abnormality of body height
23259	DDHD2 KIAA0725 SAMWD1	HP:0000002	Abnormality of body height
23310	NCAPD3 CAPD3 KIAA0056	HP:0000002	Abnormality of body height
23312	DMXL2 KIAA0856	HP:0000002	Abnormality of body height
23314	SATB2 KIAA1034	HP:0000002	Abnormality of body height
23325	WASHC4 KIAA1033	HP:0000002	Abnormality of body height
23334	SZT2 C1orf84 KIAA0467	HP:0000002	Abnormality of body height
23363	OBSL1 KIAA0657	HP:0000002	Abnormality of body height
23384	SPECC1L CYTSA KIAA0376	HP:0000002	Abnormality of body height
23387	SIK3 KIAA0999 QSK L19	HP:0000002	Abnormality of body height
23394	ADNP ADNP1 KIAA0784	HP:0000002	Abnormality of body height
23404	EXOSC2 RRP4	HP:0000002	Abnormality of body height
23405	DICER1 DICER HERNA KIAA0928	HP:0000002	Abnormality of body height
23417	MLYCD	HP:0000002	Abnormality of body height
23431	AP4E1	HP:0000002	Abnormality of body height
23432	GPR161	HP:0000002	Abnormality of body height
23483	TGDS	HP:0000002	Abnormality of body height
23498	HAAO	HP:0000002	Abnormality of body height
23499	MACF1 ABP620 ACF7 KIAA0465 KIAA1251	HP:0000002	Abnormality of body height
23512	SUZ12 CHET9 JJAZ1 KIAA0160	HP:0000002	Abnormality of body height
23514	SPIDR KIAA0146	HP:0000002	Abnormality of body height
23522	KAT6B KIAA0383 MORF MOZ2 MYST4	HP:0000002	Abnormality of body height
23530	NNT	HP:0000002	Abnormality of body height
23545	ATP6V0A2	HP:0000002	Abnormality of body height
23586	DDX58	HP:0000002	Abnormality of body height
23592	LEMD3 MAN1	HP:0000002	Abnormality of body height
23594	ORC6 ORC6L	HP:0000002	Abnormality of body height
23729	SHPK CARKL	HP:0000002	Abnormality of body height
23742	NPAP1 C15orf2	HP:0000002	Abnormality of body height
25778	DSTYK KIAA0472 RIP5 RIPK5 SGK496 HDCMD38P	HP:0000002	Abnormality of body height
25782	RAB3GAP2 KIAA0839	HP:0000002	Abnormality of body height
25836	NIPBL IDN3 SCC2	HP:0000002	Abnormality of body height
25839	COG4	HP:0000002	Abnormality of body height
25885	POLR1A	HP:0000002	Abnormality of body height
25886	POC1A WDR51A	HP:0000002	Abnormality of body height
25914	RTTN	HP:0000002	Abnormality of body height
25939	SAMHD1 MOP5	HP:0000002	Abnormality of body height
25942	SIN3A	HP:0000002	Abnormality of body height
25970	SH2B1 KIAA1299 SH2B	HP:0000002	Abnormality of body height
25977	NECAP1	HP:0000002	Abnormality of body height
26012	NSMF NELF	HP:0000002	Abnormality of body height
26053	AUTS2 KIAA0442	HP:0000002	Abnormality of body height
26123	TCTN3 C10orf61 TECT3 PSEC0041 UNQ1881/PRO4324	HP:0000002	Abnormality of body height
26128	KIFBP KBP KIAA1279 KIF1BP	HP:0000002	Abnormality of body height
26137	ZBTB20 DPZF ZNF288	HP:0000002	Abnormality of body height
26146	TRAF3IP1 IFT54 MIPT3	HP:0000002	Abnormality of body height
26154	ABCA12 ABC12	HP:0000002	Abnormality of body height
26160	IFT172 KIAA1179	HP:0000002	Abnormality of body height
26191	PTPN22 PTPN8	HP:0000002	Abnormality of body height
26227	PHGDH PGDH3	HP:0000002	Abnormality of body height
26229	B3GAT3	HP:0000002	Abnormality of body height
26277	TINF2 TIN2	HP:0000002	Abnormality of body height
26580	BSCL2	HP:0000002	Abnormality of body height
26608	TBL2 WBSCR13 UNQ563/PRO1125	HP:0000002	Abnormality of body height
26999	CYFIP2 KIAA1168 PIR121	HP:0000002	Abnormality of body height
27031	NPHP3 KIAA2000	HP:0000002	Abnormality of body height
27125	AFF4 AF5Q31 MCEF HSPC092	HP:0000002	Abnormality of body height
27130	INVS INV NPHP2	HP:0000002	Abnormality of body height
27152	INTU KIAA1284 PDZD6 PDZK6	HP:0000002	Abnormality of body height
27229	TUBGCP4 76P GCP4	HP:0000002	Abnormality of body height
27241	BBS9 PTHB1	HP:0000002	Abnormality of body height
27445	PCLO ACZ KIAA0559	HP:0000002	Abnormality of body height
28514	DLL1 UNQ146/PRO172	HP:0000002	Abnormality of body height
28952	CCDC22 CXorf37 JM1	HP:0000002	Abnormality of body height
28956	LAMTOR2 MAPBPIP ROBLD3 HSPC003	HP:0000002	Abnormality of body height
28962	OSTM1 GL HSPC019 UNQ6098/PRO21201	HP:0000002	Abnormality of body height
29072	SETD2 HIF1 HYPB KIAA1732 KMT3A SET2 HSPC069	HP:0000002	Abnormality of body height
29089	UBE2T HSPC150 PIG50	HP:0000002	Abnormality of body height
29123	ANKRD11 ANCO1	HP:0000002	Abnormality of body height
29893	PSMC3IP HOP2 TBPIP	HP:0000002	Abnormality of body height
29920	PYCR2	HP:0000002	Abnormality of body height
29926	GMPPA	HP:0000002	Abnormality of body height
29927	SEC61A1 SEC61A	HP:0000002	Abnormality of body height
29957	SLC25A24 APC1 MCSC1 SCAMC1	HP:0000002	Abnormality of body height
29980	DONSON C21orf60	HP:0000002	Abnormality of body height
30008	EFEMP2 FBLN4 UNQ200/PRO226	HP:0000002	Abnormality of body height
50485	SMARCAL1 HARP	HP:0000002	Abnormality of body height
50506	DUOX2 LNOX2 THOX2	HP:0000002	Abnormality of body height
50515	CHST11	HP:0000002	Abnormality of body height
50814	NSDHL H105E3	HP:0000002	Abnormality of body height
50937	CDON CDO	HP:0000002	Abnormality of body height
50940	PDE11A	HP:0000002	Abnormality of body height
50945	TBX22 TBOX22	HP:0000002	Abnormality of body height
50964	SOST UNQ2976/PRO7455/PRO7476	HP:0000002	Abnormality of body height
51002	TPRKB CGI-121 My019	HP:0000002	Abnormality of body height
51025	PAM16 MAGMAS TIM16 TIMM16 CGI-136	HP:0000002	Abnormality of body height
51053	GMNN	HP:0000002	Abnormality of body height
51057	WDPCP BBS15 C2orf86 FRITZ	HP:0000002	Abnormality of body height
51085	MLXIPL BHLHD14 MIO WBSCR14	HP:0000002	Abnormality of body height
51098	IFT52 C20orf9 NGD5 CGI-53	HP:0000002	Abnormality of body height
51099	ABHD5 NCIE2 CGI-58	HP:0000002	Abnormality of body height
51109	RDH11 ARSDR1 PSDR1 SDR7C1 CGI-82	HP:0000002	Abnormality of body height
51114	ZDHHC9 CXorf11 ZDHHC10 ZNF379 ZNF380 CGI-89 UNQ261/PRO298	HP:0000002	Abnormality of body height
51119	SBDS CGI-97	HP:0000002	Abnormality of body height
51132	RLIM RNF12	HP:0000002	Abnormality of body height
51199	NIN KIAA1565	HP:0000002	Abnormality of body height
51259	TMEM216 HSPC244	HP:0000002	Abnormality of body height
51339	DACT1 DPR1 HNG3	HP:0000002	Abnormality of body height
51360	MBTPS2 S2P	HP:0000002	Abnormality of body height
51506	UFC1 CGI-126 HSPC155	HP:0000002	Abnormality of body height
51574	LARP7 HDCMA18P	HP:0000002	Abnormality of body height
51594	NBAS NAG	HP:0000002	Abnormality of body height
51626	DYNC2LI1 D2LIC LIC3 CGI-60	HP:0000002	Abnormality of body height
51633	OTUD6B DUBA5 CGI-77	HP:0000002	Abnormality of body height
51651	PTRH2 BIT1 PTH2 CGI-147	HP:0000002	Abnormality of body height
51684	SUFU UNQ650/PRO1280	HP:0000002	Abnormality of body height
51715	RAB23 HSPC137	HP:0000002	Abnormality of body height
51741	WWOX FOR SDR41C1 WOX1	HP:0000002	Abnormality of body height
51750	RTEL1 C20orf41 KIAA1088 NHL	HP:0000002	Abnormality of body height
51761	ATP8A2 ATPIB	HP:0000002	Abnormality of body height
51763	INPP5K PPS SKIP	HP:0000002	Abnormality of body height
51776	MAP3K20 MLTK ZAK HCCS4	HP:0000002	Abnormality of body height
51816	ADA2 ADGF CECR1 IDGFL	HP:0000002	Abnormality of body height
53834	FGFRL1 FGFR5 FHFR UNQ480/PRO943	HP:0000002	Abnormality of body height
54361	WNT4 UNQ426/PRO864	HP:0000002	Abnormality of body height
54453	RIN2 RASSF4	HP:0000002	Abnormality of body height
54476	RNF216 TRIAD3 UBCE7IP1 ZIN	HP:0000002	Abnormality of body height
54487	DGCR8 C22orf12 DGCRK6 LP4941	HP:0000002	Abnormality of body height
54496	PRMT7 KIAA1933	HP:0000002	Abnormality of body height
54499	TMCO1 TMCC4 PNAS-10 PNAS-136 UNQ151/PRO177	HP:0000002	Abnormality of body height
54517	PUS7 KIAA1897	HP:0000002	Abnormality of body height
54539	NDUFB11 UNQ111/PRO1064	HP:0000002	Abnormality of body height
54551	MAGEL2 NDNL1	HP:0000002	Abnormality of body height
54585	LZTFL1	HP:0000002	Abnormality of body height
54757	FAM20A UNQ9388/PRO34279	HP:0000002	Abnormality of body height
54808	DYM	HP:0000002	Abnormality of body height
54809	SAMD9 C7orf5 DRIF1 KIAA2004 OEF1	HP:0000002	Abnormality of body height
54820	NDE1 NUDE	HP:0000002	Abnormality of body height
54880	BCOR KIAA1575	HP:0000002	Abnormality of body height
54888	NSUN2 SAKI TRM4	HP:0000002	Abnormality of body height
54903	MKS1	HP:0000002	Abnormality of body height
54928	BPNT2 IMPA3 IMPAD1	HP:0000002	Abnormality of body height
55033	FKBP14 FKBP22 UNQ322/PRO381	HP:0000002	Abnormality of body height
55081	IFT57 DERP8 ESRRBL1 HIPPI	HP:0000002	Abnormality of body height
55109	AGGF1 GPATC7 GPATCH7 VG5Q	HP:0000002	Abnormality of body height
55112	DYNC2I1 WDR60	HP:0000002	Abnormality of body height
55120	FANCL PHF9	HP:0000002	Abnormality of body height
55131	RBM28	HP:0000002	Abnormality of body height
55135	WRAP53 TCAB1 WDR79	HP:0000002	Abnormality of body height
55151	TMEM38B C9orf87	HP:0000002	Abnormality of body height
55154	MSTO1 LST005 SLTP005	HP:0000002	Abnormality of body height
55159	RFWD3 RNF201	HP:0000002	Abnormality of body height
55209	SETD5 KIAA1757	HP:0000002	Abnormality of body height
55212	BBS7 BBS2L1	HP:0000002	Abnormality of body height
55215	FANCI KIAA1794	HP:0000002	Abnormality of body height
55250	ELP2 STATIP1	HP:0000002	Abnormality of body height
55275	VPS53 PP13624	HP:0000002	Abnormality of body height
55315	SLC29A3 ENT3 UNQ717/PRO1380	HP:0000002	Abnormality of body height
55325	UFSP2 C4orf20	HP:0000002	Abnormality of body height
55331	ACER3 APHC PHCA	HP:0000002	Abnormality of body height
55343	SLC35C1 FUCT1	HP:0000002	Abnormality of body height
55505	NOP10 NOLA3	HP:0000002	Abnormality of body height
55599	RNPC3 KIAA1839 RBM40 RNP SNRNP65	HP:0000002	Abnormality of body height
55630	SLC39A4 ZIP4	HP:0000002	Abnormality of body height
55636	CHD7 KIAA1416	HP:0000002	Abnormality of body height
55644	OSGEP GCPL1	HP:0000002	Abnormality of body height
55651	NHP2 NOLA2 HSPC286	HP:0000002	Abnormality of body height
55670	PEX26	HP:0000002	Abnormality of body height
55697	VAC14 TAX1BP2 TRX	HP:0000002	Abnormality of body height
55699	IARS2	HP:0000002	Abnormality of body height
55703	POLR3B	HP:0000002	Abnormality of body height
55717	WDR11 BRWD2 KIAA1351 WDR15	HP:0000002	Abnormality of body height
55733	HHAT MART2 SKI1	HP:0000002	Abnormality of body height
55746	NUP133	HP:0000002	Abnormality of body height
55755	CDK5RAP2 CEP215 KIAA1633	HP:0000002	Abnormality of body height
55764	IFT122 SPG WDR10 WDR140	HP:0000002	Abnormality of body height
55773	TBC1D23 NS4ATP1	HP:0000002	Abnormality of body height
55777	MBD5 KIAA1461	HP:0000002	Abnormality of body height
55784	MCTP2	HP:0000002	Abnormality of body height
55835	CENPJ CPAP LAP LIP1	HP:0000002	Abnormality of body height
55858	TMEM165 TPARL	HP:0000002	Abnormality of body height
55869	HDAC8 HDACL1 CDA07	HP:0000002	Abnormality of body height
55906	ZC4H2 HCA127 KIAA1166	HP:0000002	Abnormality of body height
56246	MRAP C21orf61 FALP	HP:0000002	Abnormality of body height
56945	MRPS22 C3orf5 RPMS22 GK002	HP:0000002	Abnormality of body height
56975	FAM20C DMP4	HP:0000002	Abnormality of body height
57082	KNL1 CASC5 KIAA1570	HP:0000002	Abnormality of body height
57104	PNPLA2 ATGL FP17548	HP:0000002	Abnormality of body height
57122	NUP107	HP:0000002	Abnormality of body height
57167	SALL4 ZNF797	HP:0000002	Abnormality of body height
57187	THOC2 CXorf3	HP:0000002	Abnormality of body height
57477	SHROOM4 KIAA1202 SHAP	HP:0000002	Abnormality of body height
57492	ARID1B BAF250B DAN15 KIAA1235 OSA2	HP:0000002	Abnormality of body height
57531	HACE1 KIAA1320	HP:0000002	Abnormality of body height
57539	WDR35 IFT121 KIAA1336	HP:0000002	Abnormality of body height
57560	IFT80 KIAA1374 WDR56	HP:0000002	Abnormality of body height
57697	FANCM KIAA1596	HP:0000002	Abnormality of body height
57724	EPG5 KIAA1632	HP:0000002	Abnormality of body height
57728	WDR19 IFT144 KIAA1638	HP:0000002	Abnormality of body height
58484	NLRC4 CARD12 CLAN CLAN1 IPAF UNQ6189/PRO20215	HP:0000002	Abnormality of body height
59341	TRPV4 VRL2 VROAC	HP:0000002	Abnormality of body height
59344	ALOXE3	HP:0000002	Abnormality of body height
60675	PROK2 BV8	HP:0000002	Abnormality of body height
60681	FKBP10 FKBP65 PSEC0056	HP:0000002	Abnormality of body height
60684	TRAPPC11 C4orf41	HP:0000002	Abnormality of body height
63895	PIEZO2 C18orf30 C18orf58 FAM38B	HP:0000002	Abnormality of body height
63901	FAM111A KIAA1895	HP:0000002	Abnormality of body height
63976	PRDM16 KIAA1675 MEL1 PFM13	HP:0000002	Abnormality of body height
64093	SMOC1	HP:0000002	Abnormality of body height
64116	SLC39A8 BIGM103 ZIP8 PP3105	HP:0000002	Abnormality of body height
64131	XYLT1 XT1	HP:0000002	Abnormality of body height
64132	XYLT2 XT2 UNQ3058/PRO9878	HP:0000002	Abnormality of body height
64135	IFIH1 MDA5 RH116	HP:0000002	Abnormality of body height
64175	P3H1 GROS1 LEPRE1 PSEC0109	HP:0000002	Abnormality of body height
64220	STRA6 PP14296 UNQ3126/PRO10282/PRO19578	HP:0000002	Abnormality of body height
64324	NSD1 ARA267 KMT3B	HP:0000002	Abnormality of body height
64327	LMBR1 C7orf2 DIF14	HP:0000002	Abnormality of body height
64359	NXN NRX	HP:0000002	Abnormality of body height
64374	SIL1 UNQ545/PRO836	HP:0000002	Abnormality of body height
64412	GZF1 ZBTB23 ZNF336	HP:0000002	Abnormality of body height
64801	ARV1 HT035	HP:0000002	Abnormality of body height
64840	PORCN MG61 PORC PPN	HP:0000002	Abnormality of body height
65057	ACD PIP1 PTOP TINT1 TPP1	HP:0000002	Abnormality of body height
65109	UPF3B RENT3B UPF3X	HP:0000002	Abnormality of body height
65250	CPLANE1 C5orf42 JBTS17	HP:0000002	Abnormality of body height
65992	DDRGK1 C20orf116 UFBP1	HP:0000002	Abnormality of body height
79087	ALG12 PP14673	HP:0000002	Abnormality of body height
79158	GNPTAB GNPTA KIAA1208	HP:0000002	Abnormality of body height
79621	RNASEH2B DLEU8	HP:0000002	Abnormality of body height
79631	EFL1 EFTUD1 FAM42A	HP:0000002	Abnormality of body height
79641	ROGDI	HP:0000002	Abnormality of body height
79648	MCPH1	HP:0000002	Abnormality of body height
79650	USB1 C16orf57	HP:0000002	Abnormality of body height
79659	DYNC2H1 DHC1B DHC2 DNCH2 DYH1B KIAA1997	HP:0000002	Abnormality of body height
79718	TBL1XR1 IRA1 TBLR1	HP:0000002	Abnormality of body height
79728	PALB2 FANCN	HP:0000002	Abnormality of body height
79738	BBS10 C12orf58	HP:0000002	Abnormality of body height
79809	TTC21B IFT139 KIAA1992 Nbla10696	HP:0000002	Abnormality of body height
79827	CLMP ACAM ASAM UNQ318/PRO363	HP:0000002	Abnormality of body height
79848	CSPP1 CSPP	HP:0000002	Abnormality of body height
79876	UBA5 UBE1DC1	HP:0000002	Abnormality of body height
79902	NUP85 NUP75 PCNT1	HP:0000002	Abnormality of body height
79912	PYROXD1	HP:0000002	Abnormality of body height
79947	DHDDS HDS	HP:0000002	Abnormality of body height
79977	GRHL2 BOM TFCP2L3	HP:0000002	Abnormality of body height
79983	POF1B	HP:0000002	Abnormality of body height
80055	PGAP1 UNQ3024/PRO9822	HP:0000002	Abnormality of body height
80169	CTC1 C17orf68	HP:0000002	Abnormality of body height
80184	CEP290 BBS14 KIAA0373 NPHP6	HP:0000002	Abnormality of body height
80185	TTI2 C8orf41	HP:0000002	Abnormality of body height
80204	FBXO11 FBX11 PRMT9 VIT1 UG063H01	HP:0000002	Abnormality of body height
80254	CEP63	HP:0000002	Abnormality of body height
80816	ASXL3 KIAA1713	HP:0000002	Abnormality of body height
81620	CDT1	HP:0000002	Abnormality of body height
81794	ADAMTS10	HP:0000002	Abnormality of body height
81848	SPRY4	HP:0000002	Abnormality of body height
81887	LAS1L MSTP060	HP:0000002	Abnormality of body height
83452	RAB33B	HP:0000002	Abnormality of body height
83550	GPR101	HP:0000002	Abnormality of body height
83879	CDCA7 JPO1	HP:0000002	Abnormality of body height
83932	SPRTN C1orf124 DVC1 UNQ1880/PRO4323	HP:0000002	Abnormality of body height
83987	CCDC8	HP:0000002	Abnormality of body height
83990	BRIP1 BACH1 FANCJ	HP:0000002	Abnormality of body height
84068	SLC10A7 C4orf13 P7 PSEC0051	HP:0000002	Abnormality of body height
84100	ARL6 BBS3	HP:0000002	Abnormality of body height
84126	ATRIP AGS1	HP:0000002	Abnormality of body height
84153	RNASEH2C AYP1	HP:0000002	Abnormality of body height
84168	ANTXR1 ATR TEM8	HP:0000002	Abnormality of body height
84282	RNF135 L13	HP:0000002	Abnormality of body height
84295	PHF6 CENP-31 KIAA1823	HP:0000002	Abnormality of body height
84464	SLX4 BTBD12 KIAA1784 KIAA1987	HP:0000002	Abnormality of body height
84522	JAGN1	HP:0000002	Abnormality of body height
84529	CDIN1 C15orf41	HP:0000002	Abnormality of body height
84572	GNPTG C16orf27 GNPTAG CAB56184 LP2537	HP:0000002	Abnormality of body height
84627	ZNF469 KIAA1858	HP:0000002	Abnormality of body height
84634	KISS1R AXOR12 GPR54	HP:0000002	Abnormality of body height
84665	MYPN MYOP	HP:0000002	Abnormality of body height
84667	HES7 BHLHB37	HP:0000002	Abnormality of body height
84700	MYO18B	HP:0000002	Abnormality of body height
84876	ORAI1 CRACM1 TMEM142A	HP:0000002	Abnormality of body height
84879	MFSD2A MFSD2 NLS1 HMFN0656 PP9177 UNQ300/PRO341	HP:0000002	Abnormality of body height
84919	PPP1R15B	HP:0000002	Abnormality of body height
84942	WDR73 HSPC264	HP:0000002	Abnormality of body height
84976	DISP1 DISPA	HP:0000002	Abnormality of body height
85301	COL27A1 KIAA1870	HP:0000002	Abnormality of body height
85378	TUBGCP6 GCP6 KIAA1669	HP:0000002	Abnormality of body height
89884	LHX4	HP:0000002	Abnormality of body height
89891	DYNC2I2 WDR34	HP:0000002	Abnormality of body height
89910	UBE3B	HP:0000002	Abnormality of body height
89970	RSPRY1 KIAA1972 UNQ328/PRO444	HP:0000002	Abnormality of body height
90121	TSR2	HP:0000002	Abnormality of body height
90993	CREB3L1 OASIS PSEC0238	HP:0000002	Abnormality of body height
91147	TMEM67 MKS3	HP:0000002	Abnormality of body height
91252	SLC39A13 ZIP13	HP:0000002	Abnormality of body height
91647	ATPAF2 ATP12 LP3663	HP:0000002	Abnormality of body height
91869	RFT1	HP:0000002	Abnormality of body height
91949	COG7 UNQ3082/PRO10013	HP:0000002	Abnormality of body height
92002	CCNQ FAM58A	HP:0000002	Abnormality of body height
92335	STRADA LYK5 STRAD	HP:0000002	Abnormality of body height
92344	GORAB NTKLBP1 SCYL1BP1	HP:0000002	Abnormality of body height
92609	TIMM50 TIM50 PRO1512	HP:0000002	Abnormality of body height
92935	MARS2	HP:0000002	Abnormality of body height
93587	TRMT10A RG9MTD2	HP:0000002	Abnormality of body height
112858	TP53RK C20orf64 PRPK	HP:0000002	Abnormality of body height
114548	NLRP3 C1orf7 CIAS1 NALP3 PYPAF1	HP:0000002	Abnormality of body height
114803	MYSM1 KIAA1915	HP:0000002	Abnormality of body height
116150	NUS1 C6orf68 NGBR	HP:0000002	Abnormality of body height
118429	ANTXR2 CMG2	HP:0000002	Abnormality of body height
120227	CYP2R1	HP:0000002	Abnormality of body height
121214	SDR9C7 RDHS SDRO	HP:0000002	Abnormality of body height
121340	SP7 OSX	HP:0000002	Abnormality of body height
122553	TRAPPC6B	HP:0000002	Abnormality of body height
123016	TTC8 BBS8	HP:0000002	Abnormality of body height
123263	MTFMT FMT FMT1	HP:0000002	Abnormality of body height
124583	CANT1 SHAPY	HP:0000002	Abnormality of body height
124997	WDR81	HP:0000002	Abnormality of body height
126410	CYP4F22	HP:0000002	Abnormality of body height
126792	B3GALT6	HP:0000002	Abnormality of body height
127534	GJB4	HP:0000002	Abnormality of body height
128637	TBC1D20 C20orf140	HP:0000002	Abnormality of body height
128674	PROKR2 GPR73L1 PKR2	HP:0000002	Abnormality of body height
129563	DIS3L2 FAM6A	HP:0000002	Abnormality of body height
129880	BBS5	HP:0000002	Abnormality of body height
131669	UROC1	HP:0000002	Abnormality of body height
132884	EVC2 LBN	HP:0000002	Abnormality of body height
134218	DNAJC21 DNAJA5	HP:0000002	Abnormality of body height
134701	RIPPLY2 C6orf159	HP:0000002	Abnormality of body height
139285	AMER1 FAM123B WTX	HP:0000002	Abnormality of body height
142680	SLC34A3 NPT2C NPTIIC	HP:0000002	Abnormality of body height
144568	A2ML1 CPAMD9	HP:0000002	Abnormality of body height
145173	B3GLCT B3GALTL B3GTL	HP:0000002	Abnormality of body height
145258	GSC	HP:0000002	Abnormality of body height
145873	MESP2 BHLHC6 SCDO2	HP:0000002	Abnormality of body height
146206	CARMIL2 LRRC16C RLTPR	HP:0000002	Abnormality of body height
150468	CKAP2L	HP:0000002	Abnormality of body height
153241	CEP120 CCDC100	HP:0000002	Abnormality of body height
157570	ESCO2	HP:0000002	Abnormality of body height
157657	C8orf37 smalltalk	HP:0000002	Abnormality of body height
157680	VPS13B CHS1 COH1 KIAA0532	HP:0000002	Abnormality of body height
163786	SASS6 SAS6	HP:0000002	Abnormality of body height
165918	RNF168	HP:0000002	Abnormality of body height
166379	BBS12 C4orf24	HP:0000002	Abnormality of body height
168667	BMPER KIAA1965	HP:0000002	Abnormality of body height
170302	ARX	HP:0000002	Abnormality of body height
170691	ADAMTS17	HP:0000002	Abnormality of body height
171023	ASXL1 KIAA0978	HP:0000002	Abnormality of body height
196528	ARID2 BAF200 KIAA1557	HP:0000002	Abnormality of body height
197131	UBR1	HP:0000002	Abnormality of body height
201163	FLCN BHD	HP:0000002	Abnormality of body height
203068	TUBB TUBB5 OK/SW-cl.56	HP:0000002	Abnormality of body height
204219	CERS3 LASS3	HP:0000002	Abnormality of body height
221037	JMJD1C JHDM2C KIAA1380 TRIP8	HP:0000002	Abnormality of body height
223117	SEMA3D UNQ760/PRO1491	HP:0000002	Abnormality of body height
246329	STAC3	HP:0000002	Abnormality of body height
253738	EBF3 COE3	HP:0000002	Abnormality of body height
254394	MCM9 C6orf61 MCMDC1	HP:0000002	Abnormality of body height
255758	DYNLT2B TCTEX1D2	HP:0000002	Abnormality of body height
259232	NALCN VGCNL1	HP:0000002	Abnormality of body height
259266	ASPM MCPH5	HP:0000002	Abnormality of body height
261734	NPHP4 KIAA0673	HP:0000002	Abnormality of body height
284058	KANSL1 CENP-36 KIAA1267 MSL1V1 NSL1	HP:0000002	Abnormality of body height
284111	SLC13A5 NACT	HP:0000002	Abnormality of body height
284403	WDR62 C19orf14	HP:0000002	Abnormality of body height
285848	PNPLA1	HP:0000002	Abnormality of body height
286053	NSMCE2 C8orf36 MMS21	HP:0000002	Abnormality of body height
339983	NAT8L CML3	HP:0000002	Abnormality of body height
340024	SLC6A19 B0AT1	HP:0000002	Abnormality of body height
345895	RSPH4A RSHL3	HP:0000002	Abnormality of body height
347733	TUBB2B	HP:0000002	Abnormality of body height
348938	NIPAL4 ICHN NIPA4	HP:0000002	Abnormality of body height
348980	HCN1 BCNG1	HP:0000002	Abnormality of body height
374654	KIF7 UNQ340/PRO539	HP:0000002	Abnormality of body height
387733	IFITM5	HP:0000002	Abnormality of body height
389434	IYD C6orf71 DEHAL1	HP:0000002	Abnormality of body height
389827	MYMK TMEM226 TMEM8C	HP:0000002	Abnormality of body height
390594	KBTBD13	HP:0000002	Abnormality of body height
400916	CHCHD10 C22orf16	HP:0000002	Abnormality of body height
402381	SOHLH1 C9orf157 NOHLH TEB2	HP:0000002	Abnormality of body height
404672	GTF2H5 C6orf175 TTDA	HP:0000002	Abnormality of body height
405753	DUOXA2	HP:0000002	Abnormality of body height
643418	LIPN LIPL4	HP:0000002	Abnormality of body height
644096	SDHAF1 LYRM8	HP:0000002	Abnormality of body height
100144748	KLLN	HP:0000002	Abnormality of body height
72	ACTG2 ACTA3 ACTL3 ACTSG	HP:0000003	Multicystic kidney dysplasia
403	ARL3 ARFL3	HP:0000003	Multicystic kidney dysplasia
582	BBS1 BBS2L2	HP:0000003	Multicystic kidney dysplasia
583	BBS2	HP:0000003	Multicystic kidney dysplasia
585	BBS4	HP:0000003	Multicystic kidney dysplasia
699	BUB1 BUB1L	HP:0000003	Multicystic kidney dysplasia
701	BUB1B BUBR1 MAD3L SSK1	HP:0000003	Multicystic kidney dysplasia
1131	CHRM3	HP:0000003	Multicystic kidney dysplasia
1376	CPT2 CPT1	HP:0000003	Multicystic kidney dysplasia
1717	DHCR7 D7SR	HP:0000003	Multicystic kidney dysplasia
2138	EYA1	HP:0000003	Multicystic kidney dysplasia
2239	GPC4 UNQ474/PRO937	HP:0000003	Multicystic kidney dysplasia
2313	FLI1	HP:0000003	Multicystic kidney dysplasia
2719	GPC3 OCI5	HP:0000003	Multicystic kidney dysplasia
3172	HNF4A HNF4 NR2A1 TCF14	HP:0000003	Multicystic kidney dysplasia
3239	HOXD13 HOX4I	HP:0000003	Multicystic kidney dysplasia
3975	LHX1 LIM-1 LIM1	HP:0000003	Multicystic kidney dysplasia
4297	KMT2A ALL1 CXXC7 HRX HTRX MLL MLL1 TRX1	HP:0000003	Multicystic kidney dysplasia
4629	MYH11 KIAA0866	HP:0000003	Multicystic kidney dysplasia
4638	MYLK MLCK MLCK1 MYLK1	HP:0000003	Multicystic kidney dysplasia
4867	NPHP1 NPH1	HP:0000003	Multicystic kidney dysplasia
4920	ROR2 NTRKR2	HP:0000003	Multicystic kidney dysplasia
5076	PAX2	HP:0000003	Multicystic kidney dysplasia
5189	PEX1	HP:0000003	Multicystic kidney dysplasia
5190	PEX6 PXAAA1	HP:0000003	Multicystic kidney dysplasia
5192	PEX10 RNF69	HP:0000003	Multicystic kidney dysplasia
5193	PEX12 PAF3	HP:0000003	Multicystic kidney dysplasia
5194	PEX13	HP:0000003	Multicystic kidney dysplasia
5195	PEX14	HP:0000003	Multicystic kidney dysplasia
5824	PEX19 HK33 PXF OK/SW-cl.22	HP:0000003	Multicystic kidney dysplasia
5828	PEX2 PAF1 PMP3 PMP35 PXMP3 RNF72	HP:0000003	Multicystic kidney dysplasia
5830	PEX5 PXR1	HP:0000003	Multicystic kidney dysplasia
5885	RAD21 HR21 KIAA0078 NXP1 SCC1	HP:0000003	Multicystic kidney dysplasia
6299	SALL1 SAL1 ZNF794	HP:0000003	Multicystic kidney dysplasia
6495	SIX1	HP:0000003	Multicystic kidney dysplasia
6628	SNRPB COD SNRPB1	HP:0000003	Multicystic kidney dysplasia
6928	HNF1B TCF2	HP:0000003	Multicystic kidney dysplasia
7020	TFAP2A AP2TF TFAP2	HP:0000003	Multicystic kidney dysplasia
7428	VHL	HP:0000003	Multicystic kidney dysplasia
8195	MKKS BBS6	HP:0000003	Multicystic kidney dysplasia
8243	SMC1A DXS423E KIAA0178 SB1.8 SMC1 SMC1L1	HP:0000003	Multicystic kidney dysplasia
8481	OFD1 CXorf5	HP:0000003	Multicystic kidney dysplasia
8504	PEX3	HP:0000003	Multicystic kidney dysplasia
8799	PEX11B	HP:0000003	Multicystic kidney dysplasia
9096	TBX18	HP:0000003	Multicystic kidney dysplasia
9126	SMC3 BAM BMH CSPG6 SMC3L1	HP:0000003	Multicystic kidney dysplasia
9184	BUB3	HP:0000003	Multicystic kidney dysplasia
9319	TRIP13 PCH2	HP:0000003	Multicystic kidney dysplasia
9409	PEX16	HP:0000003	Multicystic kidney dysplasia
9702	CEP57 KIAA0092 TSP57	HP:0000003	Multicystic kidney dysplasia
9759	HDAC4 KIAA0288	HP:0000003	Multicystic kidney dysplasia
10225	CD96	HP:0000003	Multicystic kidney dysplasia
10806	SDCCAG8 CCCAP NPHP10 HSPC085	HP:0000003	Multicystic kidney dysplasia
11020	IFT27 RABL4 RAYL	HP:0000003	Multicystic kidney dysplasia
22954	TRIM32 HT2A	HP:0000003	Multicystic kidney dysplasia
23322	RPGRIP1L FTM KIAA1005 NPHP8	HP:0000003	Multicystic kidney dysplasia
23426	GRIP1	HP:0000003	Multicystic kidney dysplasia
23522	KAT6B KIAA0383 MORF MOZ2 MYST4	HP:0000003	Multicystic kidney dysplasia
23556	PIGN MCD4	HP:0000003	Multicystic kidney dysplasia
25802	LMOD1	HP:0000003	Multicystic kidney dysplasia
25836	NIPBL IDN3 SCC2	HP:0000003	Multicystic kidney dysplasia
26160	IFT172 KIAA1179	HP:0000003	Multicystic kidney dysplasia
27031	NPHP3 KIAA2000	HP:0000003	Multicystic kidney dysplasia
27077	B9D1 MKSR1	HP:0000003	Multicystic kidney dysplasia
27241	BBS9 PTHB1	HP:0000003	Multicystic kidney dysplasia
51057	WDPCP BBS15 C2orf86 FRITZ	HP:0000003	Multicystic kidney dysplasia
51259	TMEM216 HSPC244	HP:0000003	Multicystic kidney dysplasia
51360	MBTPS2 S2P	HP:0000003	Multicystic kidney dysplasia
54585	LZTFL1	HP:0000003	Multicystic kidney dysplasia
54903	MKS1	HP:0000003	Multicystic kidney dysplasia
55165	CEP55 C10orf3 URCC6	HP:0000003	Multicystic kidney dysplasia
55209	SETD5 KIAA1757	HP:0000003	Multicystic kidney dysplasia
55212	BBS7 BBS2L1	HP:0000003	Multicystic kidney dysplasia
55670	PEX26	HP:0000003	Multicystic kidney dysplasia
55784	MCTP2	HP:0000003	Multicystic kidney dysplasia
55869	HDAC8 HDACL1 CDA07	HP:0000003	Multicystic kidney dysplasia
56623	INPP5E	HP:0000003	Multicystic kidney dysplasia
57096	RPGRIP1	HP:0000003	Multicystic kidney dysplasia
57545	CC2D2A KIAA1345	HP:0000003	Multicystic kidney dysplasia
63895	PIEZO2 C18orf30 C18orf58 FAM38B	HP:0000003	Multicystic kidney dysplasia
64359	NXN NRX	HP:0000003	Multicystic kidney dysplasia
64840	PORCN MG61 PORC PPN	HP:0000003	Multicystic kidney dysplasia
79583	TMEM231 UNQ870/PRO1886	HP:0000003	Multicystic kidney dysplasia
79738	BBS10 C12orf58	HP:0000003	Multicystic kidney dysplasia
79848	CSPP1 CSPP	HP:0000003	Multicystic kidney dysplasia
79867	TCTN2 C12orf38 TECT2	HP:0000003	Multicystic kidney dysplasia
80000	GREB1L C18orf6 KIAA1772	HP:0000003	Multicystic kidney dysplasia
80144	FRAS1 KIAA1500	HP:0000003	Multicystic kidney dysplasia
80184	CEP290 BBS14 KIAA0373 NPHP6	HP:0000003	Multicystic kidney dysplasia
80776	B9D2 MKSR2	HP:0000003	Multicystic kidney dysplasia
84100	ARL6 BBS3	HP:0000003	Multicystic kidney dysplasia
84314	TMEM107 DC20 UNQ638/PRO1268	HP:0000003	Multicystic kidney dysplasia
91147	TMEM67 MKS3	HP:0000003	Multicystic kidney dysplasia
123016	TTC8 BBS8	HP:0000003	Multicystic kidney dysplasia
129880	BBS5	HP:0000003	Multicystic kidney dysplasia
139285	AMER1 FAM123B WTX	HP:0000003	Multicystic kidney dysplasia
145173	B3GLCT B3GALTL B3GTL	HP:0000003	Multicystic kidney dysplasia
147912	SIX5 DMAHP	HP:0000003	Multicystic kidney dysplasia
151188	ARL6IP6 PFAAP1	HP:0000003	Multicystic kidney dysplasia
157657	C8orf37 smalltalk	HP:0000003	Multicystic kidney dysplasia
166379	BBS12 C4orf24	HP:0000003	Multicystic kidney dysplasia
340419	RSPO2 UNQ9384/PRO34209	HP:0000003	Multicystic kidney dysplasia
341640	FREM2	HP:0000003	Multicystic kidney dysplasia
2	A2M CPAMD5 FWP007	HP:0000005	Mode of inheritance
16	AARS1 AARS	HP:0000005	Mode of inheritance
18	ABAT GABAT	HP:0000005	Mode of inheritance
19	ABCA1 ABC1 CERP	HP:0000005	Mode of inheritance
21	ABCA3 ABC3	HP:0000005	Mode of inheritance
22	ABCB7 ABC7	HP:0000005	Mode of inheritance
24	ABCA4 ABCR	HP:0000005	Mode of inheritance
25	ABL1 ABL JTK7	HP:0000005	Mode of inheritance
31	ACACA ACAC ACC1 ACCA	HP:0000005	Mode of inheritance
34	ACADM	HP:0000005	Mode of inheritance
35	ACADS	HP:0000005	Mode of inheritance
36	ACADSB	HP:0000005	Mode of inheritance
37	ACADVL VLCAD	HP:0000005	Mode of inheritance
38	ACAT1 ACAT MAT	HP:0000005	Mode of inheritance
39	ACAT2 ACTL	HP:0000005	Mode of inheritance
50	ACO2	HP:0000005	Mode of inheritance
51	ACOX1 ACOX	HP:0000005	Mode of inheritance
53	ACP2	HP:0000005	Mode of inheritance
54	ACP5	HP:0000005	Mode of inheritance
58	ACTA1 ACTA	HP:0000005	Mode of inheritance
59	ACTA2 ACTSA ACTVS GIG46	HP:0000005	Mode of inheritance
60	ACTB	HP:0000005	Mode of inheritance
70	ACTC1 ACTC	HP:0000005	Mode of inheritance
71	ACTG1 ACTG	HP:0000005	Mode of inheritance
72	ACTG2 ACTA3 ACTL3 ACTSG	HP:0000005	Mode of inheritance
81	ACTN4	HP:0000005	Mode of inheritance
87	ACTN1	HP:0000005	Mode of inheritance
88	ACTN2	HP:0000005	Mode of inheritance
90	ACVR1 ACVRLK2	HP:0000005	Mode of inheritance
93	ACVR2B	HP:0000005	Mode of inheritance
94	ACVRL1 ACVRLK1 ALK1	HP:0000005	Mode of inheritance
95	ACY1	HP:0000005	Mode of inheritance
100	ADA ADA1	HP:0000005	Mode of inheritance
102	ADAM10 KUZ MADM	HP:0000005	Mode of inheritance
103	ADAR ADAR1 DSRAD G1P1 IFI4	HP:0000005	Mode of inheritance
107	ADCY1	HP:0000005	Mode of inheritance
111	ADCY5	HP:0000005	Mode of inheritance
112	ADCY6 KIAA0422	HP:0000005	Mode of inheritance
120	ADD3 ADDL	HP:0000005	Mode of inheritance
132	ADK	HP:0000005	Mode of inheritance
151	ADRA2B ADRA2L1 ADRA2RL1	HP:0000005	Mode of inheritance
158	ADSL AMPS	HP:0000005	Mode of inheritance
165	AEBP1 ACLP	HP:0000005	Mode of inheritance
174	AFP HPAFP	HP:0000005	Mode of inheritance
175	AGA	HP:0000005	Mode of inheritance
176	ACAN AGC1 CSPG1 MSK16	HP:0000005	Mode of inheritance
178	AGL GDE	HP:0000005	Mode of inheritance
182	JAG1 JAGL1	HP:0000005	Mode of inheritance
183	AGT SERPINA8	HP:0000005	Mode of inheritance
185	AGTR1 AGTR1A AGTR1B AT2R1 AT2R1B	HP:0000005	Mode of inheritance
189	AGXT AGT1 SPAT	HP:0000005	Mode of inheritance
190	NR0B1 AHC DAX1	HP:0000005	Mode of inheritance
191	AHCY SAHH	HP:0000005	Mode of inheritance
196	AHR BHLHE76	HP:0000005	Mode of inheritance
197	AHSG FETUA PRO2743	HP:0000005	Mode of inheritance
203	AK1	HP:0000005	Mode of inheritance
204	AK2 ADK2	HP:0000005	Mode of inheritance
207	AKT1 PKB RAC	HP:0000005	Mode of inheritance
208	AKT2	HP:0000005	Mode of inheritance
210	ALAD	HP:0000005	Mode of inheritance
212	ALAS2 ALASE ASB	HP:0000005	Mode of inheritance
213	ALB GIG20 GIG42 PRO0903 PRO1708 PRO2044 PRO2619 PRO2675 UNQ696/PRO1341	HP:0000005	Mode of inheritance
215	ABCD1 ALD	HP:0000005	Mode of inheritance
217	ALDH2 ALDM	HP:0000005	Mode of inheritance
220	ALDH1A3 ALDH6	HP:0000005	Mode of inheritance
224	ALDH3A2 ALDH10 FALDH	HP:0000005	Mode of inheritance
226	ALDOA ALDA	HP:0000005	Mode of inheritance
229	ALDOB ALDB	HP:0000005	Mode of inheritance
242	ALOX12B	HP:0000005	Mode of inheritance
249	ALPL	HP:0000005	Mode of inheritance
257	ALX3	HP:0000005	Mode of inheritance
258	AMBN	HP:0000005	Mode of inheritance
265	AMELX AMG AMGX	HP:0000005	Mode of inheritance
268	AMH MIF	HP:0000005	Mode of inheritance
269	AMHR2 AMHR MISR2	HP:0000005	Mode of inheritance
270	AMPD1	HP:0000005	Mode of inheritance
271	AMPD2	HP:0000005	Mode of inheritance
274	BIN1 AMPHL	HP:0000005	Mode of inheritance
275	AMT GCST	HP:0000005	Mode of inheritance
283	ANG RNASE5	HP:0000005	Mode of inheritance
286	ANK1 ANK	HP:0000005	Mode of inheritance
287	ANK2 ANKB	HP:0000005	Mode of inheritance
288	ANK3	HP:0000005	Mode of inheritance
291	SLC25A4 AAC1 ANT1	HP:0000005	Mode of inheritance
311	ANXA11 ANX11	HP:0000005	Mode of inheritance
324	APC DP2.5	HP:0000005	Mode of inheritance
326	AIRE APECED	HP:0000005	Mode of inheritance
331	XIAP API3 BIRC4 IAP3	HP:0000005	Mode of inheritance
335	APOA1	HP:0000005	Mode of inheritance
338	APOB	HP:0000005	Mode of inheritance
344	APOC2 APC2	HP:0000005	Mode of inheritance
348	APOE	HP:0000005	Mode of inheritance
351	APP A4 AD1	HP:0000005	Mode of inheritance
353	APRT	HP:0000005	Mode of inheritance
355	FAS APT1 FAS1 TNFRSF6	HP:0000005	Mode of inheritance
356	FASLG APT1LG1 CD95L FASL TNFSF6	HP:0000005	Mode of inheritance
359	AQP2	HP:0000005	Mode of inheritance
362	AQP5	HP:0000005	Mode of inheritance
367	AR DHTR NR3C4	HP:0000005	Mode of inheritance
368	ABCC6 ARA MRP6	HP:0000005	Mode of inheritance
372	ARCN1 COPD	HP:0000005	Mode of inheritance
375	ARF1	HP:0000005	Mode of inheritance
383	ARG1	HP:0000005	Mode of inheritance
396	ARHGDIA GDIA1	HP:0000005	Mode of inheritance
401	PHOX2A ARIX PMX2A	HP:0000005	Mode of inheritance
403	ARL3 ARFL3	HP:0000005	Mode of inheritance
407	ARR3 ARRX CAR	HP:0000005	Mode of inheritance
410	ARSA	HP:0000005	Mode of inheritance
411	ARSB	HP:0000005	Mode of inheritance
412	STS ARSC1	HP:0000005	Mode of inheritance
415	ARSL ARSE	HP:0000005	Mode of inheritance
427	ASAH1 ASAH HSD-33 HSD33	HP:0000005	Mode of inheritance
429	ASCL1 ASH1 BHLHA46 HASH1	HP:0000005	Mode of inheritance
435	ASL	HP:0000005	Mode of inheritance
440	ASNS TS11	HP:0000005	Mode of inheritance
443	ASPA ACY2 ASP	HP:0000005	Mode of inheritance
444	ASPH BAH	HP:0000005	Mode of inheritance
445	ASS1 ASS	HP:0000005	Mode of inheritance
462	SERPINC1 AT3 PRO0309	HP:0000005	Mode of inheritance
463	ZFHX3 ATBF1 C16orf47	HP:0000005	Mode of inheritance
471	ATIC PURH OK/SW-cl.86	HP:0000005	Mode of inheritance
472	ATM	HP:0000005	Mode of inheritance
473	RERE ARG ARP ATN1L KIAA0458	HP:0000005	Mode of inheritance
476	ATP1A1	HP:0000005	Mode of inheritance
477	ATP1A2 KIAA0778	HP:0000005	Mode of inheritance
478	ATP1A3	HP:0000005	Mode of inheritance
486	FXYD2 ATP1C ATP1G1	HP:0000005	Mode of inheritance
487	ATP2A1	HP:0000005	Mode of inheritance
488	ATP2A2 ATP2B	HP:0000005	Mode of inheritance
492	ATP2B3	HP:0000005	Mode of inheritance
498	ATP5F1A ATP5A ATP5A1 ATP5AL2 ATPM	HP:0000005	Mode of inheritance
501	ALDH7A1 ATQ1	HP:0000005	Mode of inheritance
513	ATP5F1D ATP5D	HP:0000005	Mode of inheritance
514	ATP5F1E ATP5E	HP:0000005	Mode of inheritance
523	ATP6V1A ATP6A1 ATP6V1A1 VPP2	HP:0000005	Mode of inheritance
525	ATP6V1B1 ATP6B1 VATB VPP3	HP:0000005	Mode of inheritance
526	ATP6V1B2 ATP6B2 VPP3	HP:0000005	Mode of inheritance
529	ATP6V1E1 ATP6E ATP6E2	HP:0000005	Mode of inheritance
537	ATP6AP1 ATP6IP1 ATP6S1 VATPS1 XAP3	HP:0000005	Mode of inheritance
538	ATP7A MC1 MNK	HP:0000005	Mode of inheritance
540	ATP7B PWD WC1 WND	HP:0000005	Mode of inheritance
545	ATR FRP1	HP:0000005	Mode of inheritance
546	ATRX RAD54L XH2	HP:0000005	Mode of inheritance
547	KIF1A ATSV C2orf20	HP:0000005	Mode of inheritance
549	AUH	HP:0000005	Mode of inheritance
551	AVP ARVP VP	HP:0000005	Mode of inheritance
554	AVPR2 ADHR DIR DIR3 V2R	HP:0000005	Mode of inheritance
558	AXL UFO	HP:0000005	Mode of inheritance
567	B2M CDABP0092 HDCMA22P	HP:0000005	Mode of inheritance
570	BAAT	HP:0000005	Mode of inheritance
579	NKX3-2 BAPX1 NKX3B	HP:0000005	Mode of inheritance
582	BBS1 BBS2L2	HP:0000005	Mode of inheritance
583	BBS2	HP:0000005	Mode of inheritance
585	BBS4	HP:0000005	Mode of inheritance
593	BCKDHA	HP:0000005	Mode of inheritance
594	BCKDHB	HP:0000005	Mode of inheritance
611	OPN1SW BCP	HP:0000005	Mode of inheritance
613	BCR BCR1 D22S11	HP:0000005	Mode of inheritance
617	BCS1L BCS1	HP:0000005	Mode of inheritance
631	BFSP1	HP:0000005	Mode of inheritance
633	BGN SLRR1A	HP:0000005	Mode of inheritance
640	BLK	HP:0000005	Mode of inheritance
641	BLM RECQ2 RECQL3	HP:0000005	Mode of inheritance
644	BLVRA BLVR BVR	HP:0000005	Mode of inheritance
649	BMP1 PCOLC	HP:0000005	Mode of inheritance
650	BMP2 BMP2A	HP:0000005	Mode of inheritance
652	BMP4 BMP2B DVR4	HP:0000005	Mode of inheritance
657	BMPR1A ACVRLK3 ALK3	HP:0000005	Mode of inheritance
658	BMPR1B	HP:0000005	Mode of inheritance
659	BMPR2 PPH1	HP:0000005	Mode of inheritance
667	DST BP230 BP240 BPAG1 DMH DT KIAA0728	HP:0000005	Mode of inheritance
668	FOXL2	HP:0000005	Mode of inheritance
669	BPGM	HP:0000005	Mode of inheritance
672	BRCA1 RNF53	HP:0000005	Mode of inheritance
673	BRAF BRAF1 RAFB1	HP:0000005	Mode of inheritance
675	BRCA2 FACD FANCD1	HP:0000005	Mode of inheritance
676	BRDT	HP:0000005	Mode of inheritance
686	BTD	HP:0000005	Mode of inheritance
695	BTK AGMX1 ATK BPK	HP:0000005	Mode of inheritance
701	BUB1B BUBR1 MAD3L SSK1	HP:0000005	Mode of inheritance
708	C1QBP GC1QBP HABP1 SF2P32	HP:0000005	Mode of inheritance
710	SERPING1 C1IN C1NH	HP:0000005	Mode of inheritance
712	C1QA	HP:0000005	Mode of inheritance
714	C1QC C1QG	HP:0000005	Mode of inheritance
716	C1S	HP:0000005	Mode of inheritance
717	C2	HP:0000005	Mode of inheritance
718	C3 CPAMD1	HP:0000005	Mode of inheritance
726	CAPN5 NCL3	HP:0000005	Mode of inheritance
727	C5 CPAMD4	HP:0000005	Mode of inheritance
729	C6	HP:0000005	Mode of inheritance
730	C7	HP:0000005	Mode of inheritance
731	C8A	HP:0000005	Mode of inheritance
732	C8B	HP:0000005	Mode of inheritance
745	MYRF C11orf9 KIAA0954 MRF	HP:0000005	Mode of inheritance
755	CFAP410 C21orf2 LRRC76	HP:0000005	Mode of inheritance
760	CA2	HP:0000005	Mode of inheritance
762	CA4	HP:0000005	Mode of inheritance
763	CA5A CA5	HP:0000005	Mode of inheritance
767	CA8 CALS	HP:0000005	Mode of inheritance
771	CA12	HP:0000005	Mode of inheritance
773	CACNA1A CACH4 CACN3 CACNL1A4	HP:0000005	Mode of inheritance
774	CACNA1B CACH5 CACNL1A5	HP:0000005	Mode of inheritance
776	CACNA1D CACH3 CACN4 CACNL1A2 CCHL1A2	HP:0000005	Mode of inheritance
777	CACNA1E CACH6 CACNL1A6	HP:0000005	Mode of inheritance
778	CACNA1F CACNAF1	HP:0000005	Mode of inheritance
779	CACNA1S CACH1 CACN1 CACNL1A3	HP:0000005	Mode of inheritance
783	CACNB2 CACNLB2 MYSB	HP:0000005	Mode of inheritance
785	CACNB4 CACNLB4	HP:0000005	Mode of inheritance
788	SLC25A20 CAC CACT	HP:0000005	Mode of inheritance
790	CAD	HP:0000005	Mode of inheritance
801	CALM1 CALM CAM CAM1	HP:0000005	Mode of inheritance
811	CALR CRTC	HP:0000005	Mode of inheritance
815	CAMK2A CAMKA KIAA0968	HP:0000005	Mode of inheritance
816	CAMK2B CAM2 CAMK2 CAMKB	HP:0000005	Mode of inheritance
823	CAPN1 CANPL1 PIG30	HP:0000005	Mode of inheritance
825	CAPN3 CANP3 CANPL3 NCL1	HP:0000005	Mode of inheritance
831	CAST	HP:0000005	Mode of inheritance
841	CASP8 MCH5	HP:0000005	Mode of inheritance
843	CASP10 MCH4	HP:0000005	Mode of inheritance
844	CASQ1 CASQ	HP:0000005	Mode of inheritance
845	CASQ2	HP:0000005	Mode of inheritance
846	CASR GPRC2A PCAR1	HP:0000005	Mode of inheritance
847	CAT	HP:0000005	Mode of inheritance
857	CAV1 CAV	HP:0000005	Mode of inheritance
859	CAV3	HP:0000005	Mode of inheritance
860	RUNX2 AML3 CBFA1 OSF2 PEBP2A	HP:0000005	Mode of inheritance
865	CBFB	HP:0000005	Mode of inheritance
866	SERPINA6 CBG	HP:0000005	Mode of inheritance
867	CBL CBL2 RNF55	HP:0000005	Mode of inheritance
871	SERPINH1 CBP1 CBP2 HSP47 SERPINH2 PIG14	HP:0000005	Mode of inheritance
889	KRIT1 CCM1	HP:0000005	Mode of inheritance
894	CCND2	HP:0000005	Mode of inheritance
915	CD3D T3D	HP:0000005	Mode of inheritance
916	CD3E T3E	HP:0000005	Mode of inheritance
917	CD3G T3G	HP:0000005	Mode of inheritance
919	CD247 CD3Z T3Z TCRZ	HP:0000005	Mode of inheritance
925	CD8A MAL	HP:0000005	Mode of inheritance
930	CD19	HP:0000005	Mode of inheritance
931	MS4A1 CD20	HP:0000005	Mode of inheritance
939	CD27 TNFRSF7	HP:0000005	Mode of inheritance
948	CD36 GP3B GP4	HP:0000005	Mode of inheritance
950	SCARB2 CD36L2 LIMP2 LIMPII	HP:0000005	Mode of inheritance
953	ENTPD1 CD39	HP:0000005	Mode of inheritance
958	CD40 TNFRSF5	HP:0000005	Mode of inheritance
959	CD40LG CD40L TNFSF5 TRAP	HP:0000005	Mode of inheritance
966	CD59 MIC11 MIN1 MIN2 MIN3 MSK21	HP:0000005	Mode of inheritance
970	CD70 CD27L CD27LG TNFSF7	HP:0000005	Mode of inheritance
973	CD79A IGA MB1	HP:0000005	Mode of inheritance
974	CD79B B29 IGB	HP:0000005	Mode of inheritance
975	CD81 TAPA1 TSPAN28	HP:0000005	Mode of inheritance
977	CD151 TSPAN24	HP:0000005	Mode of inheritance
987	LRBA BGL CDC4L LBA	HP:0000005	Mode of inheritance
990	CDC6 CDC18L	HP:0000005	Mode of inheritance
998	CDC42	HP:0000005	Mode of inheritance
999	CDH1 CDHE UVO	HP:0000005	Mode of inheritance
1001	CDH3 CDHP	HP:0000005	Mode of inheritance
1009	CDH11	HP:0000005	Mode of inheritance
1013	CDH15 CDH14 CDH3	HP:0000005	Mode of inheritance
1020	CDK5 CDKN5	HP:0000005	Mode of inheritance
1021	CDK6 CDKN6	HP:0000005	Mode of inheritance
1027	CDKN1B KIP1	HP:0000005	Mode of inheritance
1028	CDKN1C KIP2	HP:0000005	Mode of inheritance
1029	CDKN2A CDKN2 MTS1	HP:0000005	Mode of inheritance
1041	CDSN	HP:0000005	Mode of inheritance
1050	CEBPA CEBP	HP:0000005	Mode of inheritance
1053	CEBPE	HP:0000005	Mode of inheritance
1056	CEL BAL	HP:0000005	Mode of inheritance
1062	CENPE	HP:0000005	Mode of inheritance
1063	CENPF	HP:0000005	Mode of inheritance
1071	CETP	HP:0000005	Mode of inheritance
1073	CFL2	HP:0000005	Mode of inheritance
1075	CTSC CPPI	HP:0000005	Mode of inheritance
1080	CFTR ABCC7	HP:0000005	Mode of inheritance
1103	CHAT	HP:0000005	Mode of inheritance
1105	CHD1	HP:0000005	Mode of inheritance
1106	CHD2	HP:0000005	Mode of inheritance
1107	CHD3	HP:0000005	Mode of inheritance
1108	CHD4	HP:0000005	Mode of inheritance
1120	CHKB CHETK CHKL	HP:0000005	Mode of inheritance
1121	CHM REP1 TCD	HP:0000005	Mode of inheritance
1123	CHN1 ARHGAP2 CHN	HP:0000005	Mode of inheritance
1130	LYST CHS CHS1	HP:0000005	Mode of inheritance
1131	CHRM3	HP:0000005	Mode of inheritance
1134	CHRNA1 ACHRA CHNRA	HP:0000005	Mode of inheritance
1135	CHRNA2	HP:0000005	Mode of inheritance
1137	CHRNA4 NACRA4	HP:0000005	Mode of inheritance
1139	CHRNA7 NACHRA7	HP:0000005	Mode of inheritance
1140	CHRNB1 ACHRB CHRNB	HP:0000005	Mode of inheritance
1141	CHRNB2	HP:0000005	Mode of inheritance
1144	CHRND ACHRD	HP:0000005	Mode of inheritance
1145	CHRNE ACHRE	HP:0000005	Mode of inheritance
1146	CHRNG ACHRG	HP:0000005	Mode of inheritance
1147	CHUK IKKA TCF16	HP:0000005	Mode of inheritance
1161	ERCC8 CKN1 CSA	HP:0000005	Mode of inheritance
1174	AP1S1 AP19 CLAPS1	HP:0000005	Mode of inheritance
1175	AP2S1 AP17 CLAPS2	HP:0000005	Mode of inheritance
1180	CLCN1 CLC1	HP:0000005	Mode of inheritance
1181	CLCN2	HP:0000005	Mode of inheritance
1183	CLCN4	HP:0000005	Mode of inheritance
1184	CLCN5 CLCK2	HP:0000005	Mode of inheritance
1186	CLCN7	HP:0000005	Mode of inheritance
1187	CLCNKA	HP:0000005	Mode of inheritance
1188	CLCNKB	HP:0000005	Mode of inheritance
1193	CLIC2	HP:0000005	Mode of inheritance
1200	TPP1 CLN2 GIG1 UNQ267/PRO304	HP:0000005	Mode of inheritance
1201	CLN3 BTS	HP:0000005	Mode of inheritance
1203	CLN5	HP:0000005	Mode of inheritance
1213	CLTC CLH17 CLTCL2 KIAA0034	HP:0000005	Mode of inheritance
1244	ABCC2 CMOAT CMOAT1 CMRP MRP2	HP:0000005	Mode of inheritance
1258	CNGB1 CNCG2 CNCG3L CNCG4 RCNC2	HP:0000005	Mode of inheritance
1259	CNGA1 CNCG CNCG1	HP:0000005	Mode of inheritance
1261	CNGA3 CNCG3	HP:0000005	Mode of inheritance
1272	CNTN1	HP:0000005	Mode of inheritance
1277	COL1A1	HP:0000005	Mode of inheritance
1278	COL1A2	HP:0000005	Mode of inheritance
1280	COL2A1	HP:0000005	Mode of inheritance
1281	COL3A1	HP:0000005	Mode of inheritance
1282	COL4A1	HP:0000005	Mode of inheritance
1284	COL4A2	HP:0000005	Mode of inheritance
1285	COL4A3	HP:0000005	Mode of inheritance
1286	COL4A4	HP:0000005	Mode of inheritance
1287	COL4A5	HP:0000005	Mode of inheritance
1288	COL4A6	HP:0000005	Mode of inheritance
1289	COL5A1	HP:0000005	Mode of inheritance
1291	COL6A1	HP:0000005	Mode of inheritance
1292	COL6A2	HP:0000005	Mode of inheritance
1293	COL6A3	HP:0000005	Mode of inheritance
1294	COL7A1	HP:0000005	Mode of inheritance
1296	COL8A2	HP:0000005	Mode of inheritance
1297	COL9A1	HP:0000005	Mode of inheritance
1298	COL9A2	HP:0000005	Mode of inheritance
1299	COL9A3	HP:0000005	Mode of inheritance
1300	COL10A1	HP:0000005	Mode of inheritance
1301	COL11A1 COLL6	HP:0000005	Mode of inheritance
1302	COL11A2	HP:0000005	Mode of inheritance
1303	COL12A1 COL12A1L	HP:0000005	Mode of inheritance
1305	COL13A1	HP:0000005	Mode of inheritance
1308	COL17A1 BP180 BPAG2	HP:0000005	Mode of inheritance
1311	COMP	HP:0000005	Mode of inheritance
1316	KLF6 BCD1 COPEB CPBP ST12	HP:0000005	Mode of inheritance
1326	MAP3K8 COT ESTF	HP:0000005	Mode of inheritance
1337	COX6A1 COX6AL	HP:0000005	Mode of inheritance
1340	COX6B1 COX6B	HP:0000005	Mode of inheritance
1349	COX7B	HP:0000005	Mode of inheritance
1351	COX8A COX8 COX8L	HP:0000005	Mode of inheritance
1352	COX10	HP:0000005	Mode of inheritance
1355	COX15	HP:0000005	Mode of inheritance
1356	CP	HP:0000005	Mode of inheritance
1369	CPN1 ACBP	HP:0000005	Mode of inheritance
1371	CPOX CPO CPX	HP:0000005	Mode of inheritance
1373	CPS1	HP:0000005	Mode of inheritance
1374	CPT1A CPT1	HP:0000005	Mode of inheritance
1376	CPT2 CPT1	HP:0000005	Mode of inheritance
1380	CR2 C3DR	HP:0000005	Mode of inheritance
1384	CRAT CAT1	HP:0000005	Mode of inheritance
1385	CREB1	HP:0000005	Mode of inheritance
1387	CREBBP CBP	HP:0000005	Mode of inheritance
1406	CRX CORD2	HP:0000005	Mode of inheritance
1409	CRYAA CRYA1 HSPB4	HP:0000005	Mode of inheritance
1410	CRYAB CRYA2 HSPB5	HP:0000005	Mode of inheritance
1411	CRYBA1 CRYB1	HP:0000005	Mode of inheritance
1412	CRYBA2	HP:0000005	Mode of inheritance
1413	CRYBA4	HP:0000005	Mode of inheritance
1414	CRYBB1	HP:0000005	Mode of inheritance
1415	CRYBB2 CRYB2 CRYB2A	HP:0000005	Mode of inheritance
1417	CRYBB3 CRYB3	HP:0000005	Mode of inheritance
1419	CRYGB CRYG2	HP:0000005	Mode of inheritance
1420	CRYGC CRYG3	HP:0000005	Mode of inheritance
1421	CRYGD CRYG4	HP:0000005	Mode of inheritance
1427	CRYGS CRYG8	HP:0000005	Mode of inheritance
1428	CRYM THBP	HP:0000005	Mode of inheritance
1436	CSF1R FMS	HP:0000005	Mode of inheritance
1438	CSF2RA CSF2R CSF2RY	HP:0000005	Mode of inheritance
1439	CSF2RB IL3RB IL5RB	HP:0000005	Mode of inheritance
1441	CSF3R GCSFR	HP:0000005	Mode of inheritance
1453	CSNK1D HCKID	HP:0000005	Mode of inheritance
1457	CSNK2A1 CK2A1	HP:0000005	Mode of inheritance
1462	VCAN CSPG2	HP:0000005	Mode of inheritance
1471	CST3	HP:0000005	Mode of inheritance
1475	CSTA STF1 STFA	HP:0000005	Mode of inheritance
1476	CSTB CST6 STFB	HP:0000005	Mode of inheritance
1482	NKX2-5 CSX NKX2.5 NKX2E	HP:0000005	Mode of inheritance
1487	CTBP1 CTBP	HP:0000005	Mode of inheritance
1491	CTH	HP:0000005	Mode of inheritance
1493	CTLA4 CD152	HP:0000005	Mode of inheritance
1495	CTNNA1	HP:0000005	Mode of inheritance
1496	CTNNA2 CAPR	HP:0000005	Mode of inheritance
1497	CTNS	HP:0000005	Mode of inheritance
1499	CTNNB1 CTNNB OK/SW-cl.35 PRO2286	HP:0000005	Mode of inheritance
1500	CTNND1 KIAA0384	HP:0000005	Mode of inheritance
1503	CTPS1 CTPS	HP:0000005	Mode of inheritance
1508	CTSB CPSB	HP:0000005	Mode of inheritance
1509	CTSD CPSD	HP:0000005	Mode of inheritance
1513	CTSK CTSO CTSO2	HP:0000005	Mode of inheritance
1523	CUX1 CUTL1	HP:0000005	Mode of inheritance
1528	CYB5A CYB5	HP:0000005	Mode of inheritance
1534	CYB561	HP:0000005	Mode of inheritance
1535	CYBA	HP:0000005	Mode of inheritance
1536	CYBB NOX2	HP:0000005	Mode of inheritance
1537	CYC1	HP:0000005	Mode of inheritance
1540	CYLD CYLD1 KIAA0849 HSPC057	HP:0000005	Mode of inheritance
1545	CYP1B1	HP:0000005	Mode of inheritance
1548	CYP2A6 CYP2A3	HP:0000005	Mode of inheritance
1557	CYP2C19	HP:0000005	Mode of inheritance
1559	CYP2C9 CYP2C10	HP:0000005	Mode of inheritance
1584	CYP11B1 S11BH	HP:0000005	Mode of inheritance
1585	CYP11B2	HP:0000005	Mode of inheritance
1586	CYP17A1 CYP17 S17AH	HP:0000005	Mode of inheritance
1588	CYP19A1 ARO1 CYAR CYP19	HP:0000005	Mode of inheritance
1589	CYP21A2 CYP21 CYP21B	HP:0000005	Mode of inheritance
1591	CYP24A1 CYP24	HP:0000005	Mode of inheritance
1593	CYP27A1 CYP27	HP:0000005	Mode of inheritance
1594	CYP27B1 CYP1ALPHA CYP27B	HP:0000005	Mode of inheritance
1600	DAB1	HP:0000005	Mode of inheritance
1604	CD55 CR DAF	HP:0000005	Mode of inheritance
1605	DAG1	HP:0000005	Mode of inheritance
1615	DARS1 DARS PIG40	HP:0000005	Mode of inheritance
1621	DBH	HP:0000005	Mode of inheritance
1629	DBT BCATE2	HP:0000005	Mode of inheritance
1630	DCC IGDCC1	HP:0000005	Mode of inheritance
1634	DCN SLRR1B	HP:0000005	Mode of inheritance
1636	ACE DCP DCP1	HP:0000005	Mode of inheritance
1639	DCTN1	HP:0000005	Mode of inheritance
1641	DCX DBCN LISX	HP:0000005	Mode of inheritance
1643	DDB2	HP:0000005	Mode of inheritance
1644	DDC AADC	HP:0000005	Mode of inheritance
1646	AKR1C2 DDH2	HP:0000005	Mode of inheritance
1650	DDOST KIAA0115 OST48 OK/SW-cl.45	HP:0000005	Mode of inheritance
1654	DDX3X DBX DDX3	HP:0000005	Mode of inheritance
1663	DDX11 CHL1 CHLR1 KRG2	HP:0000005	Mode of inheritance
1674	DES	HP:0000005	Mode of inheritance
1675	CFD DF PFD	HP:0000005	Mode of inheritance
1678	TIMM8A DDP DDP1 TIM8A	HP:0000005	Mode of inheritance
1687	GSDME DFNA5 ICERE1	HP:0000005	Mode of inheritance
1690	COCH COCH5B2 UNQ257/PRO294	HP:0000005	Mode of inheritance
1716	DGUOK DGK	HP:0000005	Mode of inheritance
1717	DHCR7 D7SR	HP:0000005	Mode of inheritance
1718	DHCR24 KIAA0018	HP:0000005	Mode of inheritance
1719	DHFR	HP:0000005	Mode of inheritance
1723	DHODH	HP:0000005	Mode of inheritance
1727	CYB5R3 DIA1	HP:0000005	Mode of inheritance
1729	DIAPH1 DIAP1	HP:0000005	Mode of inheritance
1730	DIAPH2 DIA	HP:0000005	Mode of inheritance
1736	DKC1 NOLA4	HP:0000005	Mode of inheritance
1737	DLAT DLTA	HP:0000005	Mode of inheritance
1738	DLD GCSL LAD PHE3	HP:0000005	Mode of inheritance
1741	DLG3 KIAA1232	HP:0000005	Mode of inheritance
1747	DLX3	HP:0000005	Mode of inheritance
1748	DLX4 BP1 DLX7 DLX8 DLX9	HP:0000005	Mode of inheritance
1749	DLX5	HP:0000005	Mode of inheritance
1756	DMD	HP:0000005	Mode of inheritance
1758	DMP1	HP:0000005	Mode of inheritance
1759	DNM1 DNM	HP:0000005	Mode of inheritance
1760	DMPK DM1PK MDPK	HP:0000005	Mode of inheritance
1763	DNA2 DNA2L KIAA0083	HP:0000005	Mode of inheritance
1767	DNAH5 DNAHC5 HL1 KIAA1603	HP:0000005	Mode of inheritance
1770	DNAH9 DNAH17L DNEL1 KIAA0357	HP:0000005	Mode of inheritance
1776	DNASE1L3 DHP2 DNAS1L3	HP:0000005	Mode of inheritance
1778	DYNC1H1 DHC1 DNCH1 DNCL DNECL DYHC KIAA0325	HP:0000005	Mode of inheritance
1785	DNM2 DYN2	HP:0000005	Mode of inheritance
1786	DNMT1 AIM CXXC9 DNMT	HP:0000005	Mode of inheritance
1788	DNMT3A	HP:0000005	Mode of inheritance
1789	DNMT3B	HP:0000005	Mode of inheritance
1794	DOCK2 KIAA0209	HP:0000005	Mode of inheritance
1795	DOCK3 KIAA0299 MOCA	HP:0000005	Mode of inheritance
1798	DPAGT1 DPAGT2	HP:0000005	Mode of inheritance
1801	DPH1 DPH2L DPH2L1 OVCA1	HP:0000005	Mode of inheritance
1804	DPP6	HP:0000005	Mode of inheritance
1806	DPYD	HP:0000005	Mode of inheritance
1807	DPYS	HP:0000005	Mode of inheritance
1811	SLC26A3 DRA	HP:0000005	Mode of inheritance
1822	ATN1 D12S755E DRPLA	HP:0000005	Mode of inheritance
1824	DSC2 CDHF2 DSC3	HP:0000005	Mode of inheritance
1825	DSC3 CDHF3 DSC4	HP:0000005	Mode of inheritance
1828	DSG1 CDHF4	HP:0000005	Mode of inheritance
1829	DSG2 CDHF5	HP:0000005	Mode of inheritance
1832	DSP	HP:0000005	Mode of inheritance
1834	DSPP	HP:0000005	Mode of inheritance
1836	SLC26A2 DTD DTDST	HP:0000005	Mode of inheritance
1837	DTNA DRP3	HP:0000005	Mode of inheritance
1848	DUSP6 MKP3 PYST1	HP:0000005	Mode of inheritance
1855	DVL1	HP:0000005	Mode of inheritance
1857	DVL3 KIAA0208	HP:0000005	Mode of inheritance
1859	DYRK1A DYRK MNB MNBH	HP:0000005	Mode of inheritance
1861	TOR1A DQ2 DYT1 TA TORA	HP:0000005	Mode of inheritance
1889	ECE1	HP:0000005	Mode of inheritance
1890	TYMP ECGF1	HP:0000005	Mode of inheritance
1892	ECHS1	HP:0000005	Mode of inheritance
1893	ECM1	HP:0000005	Mode of inheritance
1896	EDA ED1 EDA2	HP:0000005	Mode of inheritance
1906	EDN1	HP:0000005	Mode of inheritance
1908	EDN3	HP:0000005	Mode of inheritance
1909	EDNRA ETA ETRA	HP:0000005	Mode of inheritance
1910	EDNRB ETRB	HP:0000005	Mode of inheritance
1911	PHC1 EDR1 PH1	HP:0000005	Mode of inheritance
1917	EEF1A2 EEF1AL STN	HP:0000005	Mode of inheritance
1938	EEF2 EF2	HP:0000005	Mode of inheritance
1947	EFNB1 EFL3 EPLG2 LERK2	HP:0000005	Mode of inheritance
1950	EGF	HP:0000005	Mode of inheritance
1954	MEGF8 C19orf49 EGFL4 KIAA0817	HP:0000005	Mode of inheritance
1956	EGFR ERBB ERBB1 HER1	HP:0000005	Mode of inheritance
1959	EGR2 KROX20	HP:0000005	Mode of inheritance
1962	EHHADH ECHD	HP:0000005	Mode of inheritance
1967	EIF2B1 EIF2BA	HP:0000005	Mode of inheritance
1968	EIF2S3 EIF2G	HP:0000005	Mode of inheritance
1969	EPHA2 ECK	HP:0000005	Mode of inheritance
1991	ELANE ELA2	HP:0000005	Mode of inheritance
2006	ELN	HP:0000005	Mode of inheritance
2009	EML1 EMAP1 EMAPL EMAPL1	HP:0000005	Mode of inheritance
2010	EMD EDMD STA	HP:0000005	Mode of inheritance
2013	EMP2 XMP	HP:0000005	Mode of inheritance
2022	ENG END	HP:0000005	Mode of inheritance
2027	ENO3	HP:0000005	Mode of inheritance
2033	EP300 P300	HP:0000005	Mode of inheritance
2034	EPAS1 BHLHE73 HIF2A MOP2 PASD2	HP:0000005	Mode of inheritance
2035	EPB41 E41P	HP:0000005	Mode of inheritance
2036	EPB41L1 KIAA0338	HP:0000005	Mode of inheritance
2038	EPB42 E42P	HP:0000005	Mode of inheritance
2050	EPHB4 HTK MYK1 TYRO11	HP:0000005	Mode of inheritance
2052	EPHX1 EPHX EPOX	HP:0000005	Mode of inheritance
2055	CLN8 C8orf61	HP:0000005	Mode of inheritance
2056	EPO	HP:0000005	Mode of inheritance
2058	EPRS1 EPRS GLNS PARS QARS QPRS PIG32	HP:0000005	Mode of inheritance
2059	EPS8	HP:0000005	Mode of inheritance
2064	ERBB2 HER2 MLN19 NEU NGL	HP:0000005	Mode of inheritance
2065	ERBB3 HER3	HP:0000005	Mode of inheritance
2066	ERBB4 HER4	HP:0000005	Mode of inheritance
2067	ERCC1	HP:0000005	Mode of inheritance
2068	ERCC2 XPD XPDC	HP:0000005	Mode of inheritance
2070	EYA4	HP:0000005	Mode of inheritance
2071	ERCC3 XPB XPBC	HP:0000005	Mode of inheritance
2072	ERCC4 ERCC11 XPF	HP:0000005	Mode of inheritance
2073	ERCC5 ERCM2 XPG XPGC	HP:0000005	Mode of inheritance
2074	ERCC6	HP:0000005	Mode of inheritance
2074	ERCC6	HP:0000005	Mode of inheritance
2077	ERF	HP:0000005	Mode of inheritance
2099	ESR1 ESR NR3A1	HP:0000005	Mode of inheritance
2100	ESR2 ESTRB NR3A2	HP:0000005	Mode of inheritance
2103	ESRRB ERRB2 ESRL2 NR3B2	HP:0000005	Mode of inheritance
2108	ETFA	HP:0000005	Mode of inheritance
2109	ETFB FP585	HP:0000005	Mode of inheritance
2110	ETFDH	HP:0000005	Mode of inheritance
2120	ETV6 TEL TEL1	HP:0000005	Mode of inheritance
2121	EVC	HP:0000005	Mode of inheritance
2122	MECOM EVI1 MDS1 PRDM3	HP:0000005	Mode of inheritance
2130	EWSR1 EWS	HP:0000005	Mode of inheritance
2131	EXT1	HP:0000005	Mode of inheritance
2132	EXT2	HP:0000005	Mode of inheritance
2137	EXTL3 EXTL1L EXTR1 KIAA0519	HP:0000005	Mode of inheritance
2138	EYA1	HP:0000005	Mode of inheritance
2146	EZH2 KMT6	HP:0000005	Mode of inheritance
2147	F2	HP:0000005	Mode of inheritance
2153	F5	HP:0000005	Mode of inheritance
2155	F7	HP:0000005	Mode of inheritance
2157	F8 F8C	HP:0000005	Mode of inheritance
2158	F9	HP:0000005	Mode of inheritance
2159	F10	HP:0000005	Mode of inheritance
2160	F11	HP:0000005	Mode of inheritance
2161	F12	HP:0000005	Mode of inheritance
2162	F13A1 F13A	HP:0000005	Mode of inheritance
2165	F13B	HP:0000005	Mode of inheritance
2175	FANCA FAA FACA FANCH	HP:0000005	Mode of inheritance
2176	FANCC FAC FACC	HP:0000005	Mode of inheritance
2177	FANCD2 FACD	HP:0000005	Mode of inheritance
2178	FANCE FACE	HP:0000005	Mode of inheritance
2182	ACSL4 ACS4 FACL4 LACS4	HP:0000005	Mode of inheritance
2184	FAH	HP:0000005	Mode of inheritance
2186	BPTF FAC1 FALZ	HP:0000005	Mode of inheritance
2187	FANCB	HP:0000005	Mode of inheritance
2188	FANCF	HP:0000005	Mode of inheritance
2192	FBLN1 PP213	HP:0000005	Mode of inheritance
2196	FAT2 CDHF8 KIAA0811 MEGF1	HP:0000005	Mode of inheritance
2200	FBN1 FBN	HP:0000005	Mode of inheritance
2201	FBN2	HP:0000005	Mode of inheritance
2202	EFEMP1 FBLN3 FBNL	HP:0000005	Mode of inheritance
2203	FBP1 FBP	HP:0000005	Mode of inheritance
2214	FCGR3A CD16A FCG3 FCGR3 IGFR3	HP:0000005	Mode of inheritance
2218	FKTN FCMD	HP:0000005	Mode of inheritance
2224	FDPS FPS KIAA1293	HP:0000005	Mode of inheritance
2232	FDXR ADXR	HP:0000005	Mode of inheritance
2235	FECH	HP:0000005	Mode of inheritance
2239	GPC4 UNQ474/PRO937	HP:0000005	Mode of inheritance
2243	FGA	HP:0000005	Mode of inheritance
2244	FGB	HP:0000005	Mode of inheritance
2245	FGD1 FGDY ZFYVE3	HP:0000005	Mode of inheritance
2248	FGF3 INT2	HP:0000005	Mode of inheritance
2250	FGF5	HP:0000005	Mode of inheritance
2253	FGF8 AIGF	HP:0000005	Mode of inheritance
2254	FGF9	HP:0000005	Mode of inheritance
2255	FGF10	HP:0000005	Mode of inheritance
2257	FGF12 FGF12B FHF1	HP:0000005	Mode of inheritance
2259	FGF14 FHF4	HP:0000005	Mode of inheritance
2260	FGFR1 BFGFR CEK FGFBR FLG FLT2 HBGFR	HP:0000005	Mode of inheritance
2261	FGFR3 JTK4	HP:0000005	Mode of inheritance
2263	FGFR2 BEK KGFR KSAM	HP:0000005	Mode of inheritance
2266	FGG PRO2061	HP:0000005	Mode of inheritance
2271	FH	HP:0000005	Mode of inheritance
2273	FHL1 SLIM1	HP:0000005	Mode of inheritance
2290	FOXG1 FKH2 FKHL1 FKHL2 FKHL3 FKHL4 FOXG1A FOXG1B FOXG1C	HP:0000005	Mode of inheritance
2294	FOXF1 FKHL5 FREAC1	HP:0000005	Mode of inheritance
2296	FOXC1 FKHL7 FREAC3	HP:0000005	Mode of inheritance
2299	FOXI1 FKHL10 FREAC6	HP:0000005	Mode of inheritance
2301	FOXE3 FKHL12 FREAC8	HP:0000005	Mode of inheritance
2303	FOXC2 FKHL14 MFH1	HP:0000005	Mode of inheritance
2304	FOXE1 FKHL15 FOXE2 TITF2 TTF2	HP:0000005	Mode of inheritance
2308	FOXO1 FKHR FOXO1A	HP:0000005	Mode of inheritance
2312	FLG	HP:0000005	Mode of inheritance
2313	FLI1	HP:0000005	Mode of inheritance
2316	FLNA FLN FLN1	HP:0000005	Mode of inheritance
2317	FLNB FLN1L FLN3 TABP TAP	HP:0000005	Mode of inheritance
2318	FLNC ABPL FLN2	HP:0000005	Mode of inheritance
2322	FLT3 CD135 FLK2 STK1	HP:0000005	Mode of inheritance
2324	FLT4 VEGFR3	HP:0000005	Mode of inheritance
2328	FMO3	HP:0000005	Mode of inheritance
2332	FMR1	HP:0000005	Mode of inheritance
2334	AFF2 FMR2 OX19	HP:0000005	Mode of inheritance
2348	FOLR1 FOLR	HP:0000005	Mode of inheritance
2395	FXN FRDA X25	HP:0000005	Mode of inheritance
2475	MTOR FRAP FRAP1 FRAP2 RAFT1 RAPT1	HP:0000005	Mode of inheritance
2483	FRG1	HP:0000005	Mode of inheritance
2488	FSHB	HP:0000005	Mode of inheritance
2492	FSHR LGR1	HP:0000005	Mode of inheritance
2495	FTH1 FTH FTHL6 OK/SW-cl.84 PIG15	HP:0000005	Mode of inheritance
2512	FTL	HP:0000005	Mode of inheritance
2516	NR5A1 AD4BP FTZF1 SF1	HP:0000005	Mode of inheritance
2517	FUCA1 Nbla10230	HP:0000005	Mode of inheritance
2521	FUS TLS	HP:0000005	Mode of inheritance
2530	FUT8	HP:0000005	Mode of inheritance
2531	KDSR FVT1 SDR35C1	HP:0000005	Mode of inheritance
2533	FYB1 FYB SLAP130	HP:0000005	Mode of inheritance
2535	FZD2	HP:0000005	Mode of inheritance
2538	G6PC1 G6PC G6PT	HP:0000005	Mode of inheritance
2539	G6PD	HP:0000005	Mode of inheritance
2542	SLC37A4 G6PT G6PT1 PRO0685 TRG19	HP:0000005	Mode of inheritance
2548	GAA	HP:0000005	Mode of inheritance
2549	GAB1	HP:0000005	Mode of inheritance
2554	GABRA1	HP:0000005	Mode of inheritance
2560	GABRB1	HP:0000005	Mode of inheritance
2561	GABRB2	HP:0000005	Mode of inheritance
2562	GABRB3	HP:0000005	Mode of inheritance
2566	GABRG2	HP:0000005	Mode of inheritance
2571	GAD1 GAD GAD67	HP:0000005	Mode of inheritance
2581	GALC	HP:0000005	Mode of inheritance
2582	GALE	HP:0000005	Mode of inheritance
2583	B4GALNT1 GALGT SIAT2	HP:0000005	Mode of inheritance
2584	GALK1 GALK	HP:0000005	Mode of inheritance
2588	GALNS	HP:0000005	Mode of inheritance
2591	GALNT3	HP:0000005	Mode of inheritance
2592	GALT	HP:0000005	Mode of inheritance
2593	GAMT	HP:0000005	Mode of inheritance
2617	GARS1 GARS	HP:0000005	Mode of inheritance
2622	GAS8 DRC4 GAS11	HP:0000005	Mode of inheritance
2623	GATA1 ERYF1 GF1	HP:0000005	Mode of inheritance
2624	GATA2	HP:0000005	Mode of inheritance
2625	GATA3	HP:0000005	Mode of inheritance
2626	GATA4	HP:0000005	Mode of inheritance
2627	GATA6	HP:0000005	Mode of inheritance
2628	GATM AGAT	HP:0000005	Mode of inheritance
2629	GBA GC GLUC	HP:0000005	Mode of inheritance
2632	GBE1	HP:0000005	Mode of inheritance
2639	GCDH	HP:0000005	Mode of inheritance
2643	GCH1 DYT5 GCH	HP:0000005	Mode of inheritance
2645	GCK	HP:0000005	Mode of inheritance
2651	GCNT2 GCNT5 II NACGT1	HP:0000005	Mode of inheritance
2653	GCSH	HP:0000005	Mode of inheritance
2657	GDF1	HP:0000005	Mode of inheritance
2658	GDF2 BMP9	HP:0000005	Mode of inheritance
2660	MSTN GDF8	HP:0000005	Mode of inheritance
2661	GDF9	HP:0000005	Mode of inheritance
2664	GDI1 GDIL OPHN2 RABGDIA XAP4	HP:0000005	Mode of inheritance
2668	GDNF	HP:0000005	Mode of inheritance
2670	GFAP	HP:0000005	Mode of inheritance
2671	GFER ALR HERV1 HPO	HP:0000005	Mode of inheritance
2672	GFI1 ZNF163	HP:0000005	Mode of inheritance
2673	GFPT1 GFAT GFPT	HP:0000005	Mode of inheritance
2677	GGCX GC	HP:0000005	Mode of inheritance
2678	GGT1 GGT	HP:0000005	Mode of inheritance
2683	B4GALT1 GGTB2	HP:0000005	Mode of inheritance
2688	GH1	HP:0000005	Mode of inheritance
2690	GHR	HP:0000005	Mode of inheritance
2693	GHSR	HP:0000005	Mode of inheritance
2694	CBLIF GIF IFMH	HP:0000005	Mode of inheritance
2697	GJA1 GJAL	HP:0000005	Mode of inheritance
2700	GJA3	HP:0000005	Mode of inheritance
2702	GJA5	HP:0000005	Mode of inheritance
2703	GJA8	HP:0000005	Mode of inheritance
2705	GJB1 CX32	HP:0000005	Mode of inheritance
2706	GJB2	HP:0000005	Mode of inheritance
2707	GJB3 CX31	HP:0000005	Mode of inheritance
2710	GK	HP:0000005	Mode of inheritance
2717	GLA	HP:0000005	Mode of inheritance
2719	GPC3 OCI5	HP:0000005	Mode of inheritance
2720	GLB1 ELNR1	HP:0000005	Mode of inheritance
2729	GCLC GLCL GLCLC	HP:0000005	Mode of inheritance
2731	GLDC GCSP	HP:0000005	Mode of inheritance
2733	GLE1 GLE1L	HP:0000005	Mode of inheritance
2735	GLI1 GLI	HP:0000005	Mode of inheritance
2736	GLI2 THP	HP:0000005	Mode of inheritance
2737	GLI3	HP:0000005	Mode of inheritance
2741	GLRA1	HP:0000005	Mode of inheritance
2743	GLRB	HP:0000005	Mode of inheritance
2744	GLS GLS1 KIAA0838	HP:0000005	Mode of inheritance
2746	GLUD1 GLUD	HP:0000005	Mode of inheritance
2752	GLUL GLNS	HP:0000005	Mode of inheritance
2760	GM2A	HP:0000005	Mode of inheritance
2767	GNA11 GA11	HP:0000005	Mode of inheritance
2771	GNAI2 GNAI2B	HP:0000005	Mode of inheritance
2773	GNAI3	HP:0000005	Mode of inheritance
2774	GNAL	HP:0000005	Mode of inheritance
2775	GNAO1	HP:0000005	Mode of inheritance
2776	GNAQ GAQ	HP:0000005	Mode of inheritance
2778	GNAS GNAS1	HP:0000005	Mode of inheritance
2779	GNAT1 GNATR	HP:0000005	Mode of inheritance
2780	GNAT2 GNATC	HP:0000005	Mode of inheritance
2782	GNB1	HP:0000005	Mode of inheritance
2784	GNB3	HP:0000005	Mode of inheritance
2796	GNRH1 GNRH GRH LHRH	HP:0000005	Mode of inheritance
2798	GNRHR GRHR	HP:0000005	Mode of inheritance
2799	GNS	HP:0000005	Mode of inheritance
2811	GP1BA	HP:0000005	Mode of inheritance
2812	GP1BB	HP:0000005	Mode of inheritance
2815	GP9	HP:0000005	Mode of inheritance
2819	GPD1	HP:0000005	Mode of inheritance
2821	GPI	HP:0000005	Mode of inheritance
2892	GRIA3 GLUR3 GLURC	HP:0000005	Mode of inheritance
2893	GRIA4 GLUR4	HP:0000005	Mode of inheritance
2895	GRID2 GLURD2	HP:0000005	Mode of inheritance
2896	GRN	HP:0000005	Mode of inheritance
2898	GRIK2 GLUR6	HP:0000005	Mode of inheritance
2902	GRIN1 NMDAR1	HP:0000005	Mode of inheritance
2903	GRIN2A NMDAR2A	HP:0000005	Mode of inheritance
2904	GRIN2B NMDAR2B	HP:0000005	Mode of inheritance
2906	GRIN2D GluN2D NMDAR2D	HP:0000005	Mode of inheritance
2908	NR3C1 GRL	HP:0000005	Mode of inheritance
2911	GRM1 GPRC1A MGLUR1	HP:0000005	Mode of inheritance
2916	GRM6 GPRC1F MGLUR6	HP:0000005	Mode of inheritance
2934	GSN	HP:0000005	Mode of inheritance
2937	GSS	HP:0000005	Mode of inheritance
2956	MSH6 GTBP	HP:0000005	Mode of inheritance
2961	GTF2E2 TF2E2	HP:0000005	Mode of inheritance
2972	BRF1 BRF GTF3B TAF3B2 TAF3C	HP:0000005	Mode of inheritance
2979	GUCA1B GCAP2	HP:0000005	Mode of inheritance
2982	GUCY1A1 GUC1A3 GUCSA3 GUCY1A3	HP:0000005	Mode of inheritance
2984	GUCY2C GUC2C STAR	HP:0000005	Mode of inheritance
2990	GUSB	HP:0000005	Mode of inheritance
2992	GYG1 GYG	HP:0000005	Mode of inheritance
2997	GYS1 GYS	HP:0000005	Mode of inheritance
2998	GYS2	HP:0000005	Mode of inheritance
3000	GUCY2D CORD6 GUC1A4 GUC2D RETGC RETGC1	HP:0000005	Mode of inheritance
3008	H1-4 H1F4 HIST1H1E	HP:0000005	Mode of inheritance
3028	HSD17B10 ERAB HADH2 MRPP2 SCHAD SDR5C1 XH98G2	HP:0000005	Mode of inheritance
3030	HADHA HADH	HP:0000005	Mode of inheritance
3032	HADHB MSTP029	HP:0000005	Mode of inheritance
3033	HADH HAD HAD1 HADHSC SCHAD	HP:0000005	Mode of inheritance
3035	HARS1 HARS HRS	HP:0000005	Mode of inheritance
3043	HBB	HP:0000005	Mode of inheritance
3048	HBG2	HP:0000005	Mode of inheritance
3052	HCCS CCHL	HP:0000005	Mode of inheritance
3053	SERPIND1 HCF2	HP:0000005	Mode of inheritance
3054	HCFC1 HCF1 HFC1	HP:0000005	Mode of inheritance
3060	HCRT OX PPORX PPOX	HP:0000005	Mode of inheritance
[truncated: 494,205+ more rows]

## Sheet: Table S1B
Supplementary Table S1B. Independent test set.
Independent test set of 128,115 gene-phenotype associations that were newly included in the database between June 2019 and April 2021.
Entrez Gene ID	Gene Name	HPO Term ID	HPO Term Name
86	ACTL6A BAF53 BAF53A INO80K	HP:0000002	Abnormality of body height
104	ADARB1 ADAR2 DRADA2 RED1	HP:0000002	Abnormality of body height
128	ADH5 ADHX FDH	HP:0000002	Abnormality of body height
162	AP1B1 ADTB1 BAM22 CLAPB2	HP:0000002	Abnormality of body height
646	BNC1 BNC	HP:0000002	Abnormality of body height
774	CACNA1B CACH5 CACNL1A5	HP:0000002	Abnormality of body height
815	CAMK2A CAMKA KIAA0968	HP:0000002	Abnormality of body height
816	CAMK2B CAM2 CAMK2 CAMKB	HP:0000002	Abnormality of body height
818	CAMK2G CAMK CAMK-II CAMKG	HP:0000002	Abnormality of body height
833	CARS1 CARS	HP:0000002	Abnormality of body height
1013	CDH15 CDH14 CDH3	HP:0000002	Abnormality of body height
1026	CDKN1A CAP20 CDKN1 CIP1 MDA6 PIC1 SDI1 WAF1	HP:0000002	Abnormality of body height
1027	CDKN1B KIP1	HP:0000002	Abnormality of body height
1030	CDKN2B MTS2	HP:0000002	Abnormality of body height
1031	CDKN2C CDKN6	HP:0000002	Abnormality of body height
1327	COX4I1 COX4	HP:0000002	Abnormality of body height
1351	COX8A COX8 COX8L	HP:0000002	Abnormality of body height
1460	CSNK2B CK2N G5A	HP:0000002	Abnormality of body height
1656	DDX6 HLR2 RCK	HP:0000002	Abnormality of body height
1725	DHPS DS	HP:0000002	Abnormality of body height
1742	DLG4 PSD95	HP:0000002	Abnormality of body height
1778	DYNC1H1 DHC1 DNCH1 DNCL DNECL DYHC KIAA0325	HP:0000002	Abnormality of body height
1781	DYNC1I2 DNCI2 DNCIC2	HP:0000002	Abnormality of body height
2036	EPB41L1 KIAA0338	HP:0000002	Abnormality of body height
2193	FARSA FARS FARSL FARSLA	HP:0000002	Abnormality of body height
2290	FOXG1 FKH2 FKHL1 FKHL2 FKHL3 FKHL4 FOXG1A FOXG1B FOXG1C	HP:0000002	Abnormality of body height
2353	FOS G0S7	HP:0000002	Abnormality of body height
2555	GABRA2	HP:0000002	Abnormality of body height
2558	GABRA5	HP:0000002	Abnormality of body height
2566	GABRG2	HP:0000002	Abnormality of body height
2590	GALNT2	HP:0000002	Abnormality of body height
2617	GARS1 GARS	HP:0000002	Abnormality of body height
2628	GATM AGAT	HP:0000002	Abnormality of body height
2692	GHRHR	HP:0000002	Abnormality of body height
2806	GOT2 KYAT4	HP:0000002	Abnormality of body height
2902	GRIN1 NMDAR1	HP:0000002	Abnormality of body height
2903	GRIN2A NMDAR2A	HP:0000002	Abnormality of body height
2904	GRIN2B NMDAR2B	HP:0000002	Abnormality of body height
2917	GRM7 GPRC1G MGLUR7	HP:0000002	Abnormality of body height
3097	HIVEP2	HP:0000002	Abnormality of body height
3098	HK1	HP:0000002	Abnormality of body height
3119	HLA-DQB1 HLA-DQB	HP:0000002	Abnormality of body height
3170	FOXA2 HNF3B TCF3B	HP:0000002	Abnormality of body height
3190	HNRNPK HNRPK	HP:0000002	Abnormality of body height
3716	JAK1 JAK1A JAK1B	HP:0000002	Abnormality of body height
3756	KCNH1 EAG EAG1	HP:0000002	Abnormality of body height
3778	KCNMA1 KCNMA SLO	HP:0000002	Abnormality of body height
3953	LEPR DB OBR	HP:0000002	Abnormality of body height
4001	LMNB1 LMN2 LMNB	HP:0000002	Abnormality of body height
4047	LSS OSC	HP:0000002	Abnormality of body height
4125	MAN2B1 LAMAN MANB	HP:0000002	Abnormality of body height
4160	MC4R	HP:0000002	Abnormality of body height
4193	MDM2	HP:0000002	Abnormality of body height
4221	MEN1 SCG2	HP:0000002	Abnormality of body height
4613	MYCN BHLHE37 NMYC	HP:0000002	Abnormality of body height
4697	NDUFA4	HP:0000002	Abnormality of body height
4796	TONSL IKBR NFKBIL2	HP:0000002	Abnormality of body height
4869	NPM1 NPM	HP:0000002	Abnormality of body height
4948	OCA2 D15S12 P	HP:0000002	Abnormality of body height
5238	PGM3 AGM1	HP:0000002	Abnormality of body height
5256	PHKA2 PHKLA PYK	HP:0000002	Abnormality of body height
5261	PHKG2	HP:0000002	Abnormality of body height
5307	PITX1 BFT PTX1	HP:0000002	Abnormality of body height
5317	PKP1	HP:0000002	Abnormality of body height
5324	PLAG1	HP:0000002	Abnormality of body height
5422	POLA1 POLA	HP:0000002	Abnormality of body height
5468	PPARG NR1C3	HP:0000002	Abnormality of body height
5631	PRPS1	HP:0000002	Abnormality of body height
5718	PSMD12	HP:0000002	Abnormality of body height
6137	RPL13 BBC1 OK/SW-cl.46	HP:0000002	Abnormality of body height
6160	RPL31	HP:0000002	Abnormality of body height
6337	SCNN1A SCNN1	HP:0000002	Abnormality of body height
6338	SCNN1B	HP:0000002	Abnormality of body height
6340	SCNN1G	HP:0000002	Abnormality of body height
6418	SET	HP:0000002	Abnormality of body height
6499	SKIV2L DDX13 SKI2W SKIV2 W	HP:0000002	Abnormality of body height
6602	SMARCD1 BAF60A	HP:0000002	Abnormality of body height
6659	SOX4	HP:0000002	Abnormality of body height
6925	TCF4 BHLHB19 ITF2 SEF2	HP:0000002	Abnormality of body height
6942	TCF20 KIAA0292 SPBP	HP:0000002	Abnormality of body height
7025	NR2F1 EAR3 ERBAL3 TFCOUP1	HP:0000002	Abnormality of body height
7201	TRHR	HP:0000002	Abnormality of body height
7355	SLC35A2 UGALT UGT UGTL	HP:0000002	Abnormality of body height
7874	USP7 HAUSP	HP:0000002	Abnormality of body height
8087	FXR1	HP:0000002	Abnormality of body height
8295	TRRAP PAF400	HP:0000002	Abnormality of body height
8471	IRS4	HP:0000002	Abnormality of body height
8567	MADD DENN IG20 KIAA0358	HP:0000002	Abnormality of body height
8642	DCHS1 CDH19 CDH25 FIB1 KIAA1773 PCDH16	HP:0000002	Abnormality of body height
8720	MBTPS1 KIAA0091 S1P SKI1	HP:0000002	Abnormality of body height
8766	RAB11A RAB11	HP:0000002	Abnormality of body height
8788	DLK1 DLK	HP:0000002	Abnormality of body height
9024	BRSK2 C11orf7 PEN11B SADA STK29 HUSSY-12	HP:0000002	Abnormality of body height
9130	FAM50A DXS9928E HXC26 XAP5	HP:0000002	Abnormality of body height
9131	AIFM1 AIF PDCD8	HP:0000002	Abnormality of body height
9653	HS2ST1 HS2ST KIAA0448	HP:0000002	Abnormality of body height
9739	SETD1A KIAA0339 KMT2F SET1 SET1A	HP:0000002	Abnormality of body height
9894	TELO2 KIAA0683	HP:0000002	Abnormality of body height
9922	IQSEC1 ARFGEP100 BRAG2 KIAA0763	HP:0000002	Abnormality of body height
9969	MED13 ARC250 KIAA0593 THRAP1 TRAP240	HP:0000002	Abnormality of body height
10075	HUWE1 KIAA0312 KIAA1578 UREB1 HSPC272	HP:0000002	Abnormality of body height
10274	STAG1 SA1 SCC3	HP:0000002	Abnormality of body height
10312	TCIRG1 ATP6N1C ATP6V0A3	HP:0000002	Abnormality of body height
10369	CACNG2	HP:0000002	Abnormality of body height
10466	COG5 GOLTC1 GTC90	HP:0000002	Abnormality of body height
10651	MTX2	HP:0000002	Abnormality of body height
10765	KDM5B JARID1B PLU1 RBBP2H1	HP:0000002	Abnormality of body height
10771	ZMYND11 BRAM1 BS69	HP:0000002	Abnormality of body height
10940	POP1 KIAA0061	HP:0000002	Abnormality of body height
11014	KDELR2 ERD2.2	HP:0000002	Abnormality of body height
22800	RRAS2 TC21	HP:0000002	Abnormality of body height
22808	MRAS RRAS3	HP:0000002	Abnormality of body height
22854	NTNG1 KIAA0976 LMNT1 UNQ571/PRO1133	HP:0000002	Abnormality of body height
22856	CHSY1 CHSY CSS1 KIAA0990 UNQ756/PRO1487	HP:0000002	Abnormality of body height
22880	MORC2 KIAA0852 ZCWCC1	HP:0000002	Abnormality of body height
23001	WDFY3 KIAA0993	HP:0000002	Abnormality of body height
23019	CNOT1 CDC39 KIAA1007 NOT1 AD-005	HP:0000002	Abnormality of body height
23040	MYT1L KIAA1106	HP:0000002	Abnormality of body height
23097	CDK19 CDC2L6 CDK11 KIAA1028	HP:0000002	Abnormality of body height
23152	CIC KIAA0306	HP:0000002	Abnormality of body height
23162	MAPK8IP3 JIP3 KIAA1066	HP:0000002	Abnormality of body height
23184	MESD KIAA0081 MESDC2 MESDM UNQ1911/PRO4369	HP:0000002	Abnormality of body height
23233	EXOC6B KIAA0919 SEC15B SEC15L2	HP:0000002	Abnormality of body height
23291	FBXW11 BTRCP2 FBW1B FBXW1B KIAA0696	HP:0000002	Abnormality of body height
23389	MED13L KIAA1025 PROSIT240 THRAP2 TRAP240L	HP:0000002	Abnormality of body height
23395	LARS2 KIAA0028	HP:0000002	Abnormality of body height
23761	PISD	HP:0000002	Abnormality of body height
25871	NEPRO C3orf17	HP:0000002	Abnormality of body height
25973	PARS2	HP:0000002	Abnormality of body height
26100	WIPI2 CGI-50	HP:0000002	Abnormality of body height
26115	TANC2 KIAA1148 KIAA1636	HP:0000002	Abnormality of body height
26173	INTS1 KIAA1440 UNQ1821/PRO3434	HP:0000002	Abnormality of body height
26224	FBXL3 FBL3A FBXL3A	HP:0000002	Abnormality of body height
28958	COA3 CCDC56 MITRAC12 HSPC009	HP:0000002	Abnormality of body height
29081	METTL5 DC3 HSPC133	HP:0000002	Abnormality of body height
29895	MYLPF	HP:0000002	Abnormality of body height
29940	DSE SART2	HP:0000002	Abnormality of body height
51204	TACO1 CCDC44 PRO0477	HP:0000002	Abnormality of body height
51399	TRAPPC4 SBDN CGI-104 HSPC172 PTD009	HP:0000002	Abnormality of body height
51412	ACTL6B ACTL6 BAF53B	HP:0000002	Abnormality of body height
51780	KDM3B C5orf7 JHDM2B JMJD1B KIAA1082	HP:0000002	Abnormality of body height
54681	P4HTM PH4	HP:0000002	Abnormality of body height
54892	NCAPG2 LUZP5	HP:0000002	Abnormality of body height
54974	THG1L ICF45	HP:0000002	Abnormality of body height
55012	PPP2R3C C14orf10 G5PR	HP:0000002	Abnormality of body height
55037	PTCD3 MRPS39 TRG15	HP:0000002	Abnormality of body height
55152	DALRD3	HP:0000002	Abnormality of body height
55262	TRAPPC14 C7orf43 MAP11	HP:0000002	Abnormality of body height
55621	TRMT1	HP:0000002	Abnormality of body height
55627	SMPD4 KIAA1418 SKNY	HP:0000002	Abnormality of body height
55656	INTS8 C8orf52	HP:0000002	Abnormality of body height
55790	CSGALNACT1 CHGN GALNACT1 UNQ656/PRO1287	HP:0000002	Abnormality of body height
55870	ASH1L KIAA1420 KMT2H	HP:0000002	Abnormality of body height
55904	KMT2E MLL5	HP:0000002	Abnormality of body height
56479	KCNQ5	HP:0000002	Abnormality of body height
56992	KIF15 KLP2 KNSL7	HP:0000002	Abnormality of body height
57178	ZMIZ1 KIAA1224 RAI17 ZIMP10	HP:0000002	Abnormality of body height
57551	TAOK1 KIAA1361 MAP3K16 MARKK	HP:0000002	Abnormality of body height
57680	CHD8 HELSNF1 KIAA1564	HP:0000002	Abnormality of body height
58508	KMT2C HALR KIAA1506 MLL3	HP:0000002	Abnormality of body height
60561	RINT1	HP:0000002	Abnormality of body height
63035	BCORL1	HP:0000002	Abnormality of body height
64432	MRPS25 RPMS25	HP:0000002	Abnormality of body height
64682	ANAPC1 TSG24	HP:0000002	Abnormality of body height
79048	SECISBP2 SBP2	HP:0000002	Abnormality of body height
79184	BRCC3 BRCC36 C6.1A CXorf53	HP:0000002	Abnormality of body height
79415	CYBC1 C17orf62 EROS	HP:0000002	Abnormality of body height
79576	NKAP	HP:0000002	Abnormality of body height
79633	FAT4 CDHF14 FATJ Nbla00548	HP:0000002	Abnormality of body height
79813	EHMT1 EUHMTASE1 GLP KIAA1876 KMT1D	HP:0000002	Abnormality of body height
80036	TRPM3 KIAA1616 LTRPC3	HP:0000002	Abnormality of body height
80152	CENPT C16orf56 ICEN22	HP:0000002	Abnormality of body height
81704	DOCK8	HP:0000002	Abnormality of body height
83737	ITCH	HP:0000002	Abnormality of body height
84188	FAR1 MLSTD2 UNQ2423/PRO4981	HP:0000002	Abnormality of body height
84623	KIRREL3 KIAA1867 NEPH2 UNQ5923/PRO4502/PRO19814	HP:0000002	Abnormality of body height
84695	LOXL3 LOXL	HP:0000002	Abnormality of body height
91461	PKDCC SGK493 VLK	HP:0000002	Abnormality of body height
113189	CHST14 D4ST1 UNQ1925/PRO4400	HP:0000002	Abnormality of body height
116931	MED12L KIAA1635 TNRC11L TRALP TRALPUSH PRO0314	HP:0000002	Abnormality of body height
166929	SGMS2 SMS2	HP:0000002	Abnormality of body height
171568	POLR3H KIAA1665 RPC8	HP:0000002	Abnormality of body height
205717	USF3 KIAA2018	HP:0000002	Abnormality of body height
283489	CHAMP1 C13orf8 CAMP CHAMP KIAA1802 ZNF828	HP:0000002	Abnormality of body height
284119	CAVIN1 PTRF FKSG13	HP:0000002	Abnormality of body height
285175	UNC80 C2orf21 KIAA1843	HP:0000002	Abnormality of body height
317662	FAM149B1 KIAA0974	HP:0000002	Abnormality of body height
374969	SVBP CCDC23	HP:0000002	Abnormality of body height
388015	RTL1 MAR1 MART1 PEG11	HP:0000002	Abnormality of body height
3909	LAMA3 LAMNA	HP:0000003	Multicystic kidney dysplasia
3914	LAMB3 LAMNB1	HP:0000003	Multicystic kidney dysplasia
3918	LAMC2 LAMB2T LAMNB2	HP:0000003	Multicystic kidney dysplasia
8405	SPOP	HP:0000003	Multicystic kidney dysplasia
9158	FIBP	HP:0000003	Multicystic kidney dysplasia
9839	ZEB2 KIAA0569 SIP1 ZFHX1B ZFX1B HRIHFB2411	HP:0000003	Multicystic kidney dysplasia
20	ABCA2 ABC2 KIAA1062	HP:0000005	Mode of inheritance
104	ADARB1 ADAR2 DRADA2 RED1	HP:0000005	Mode of inheritance
109	ADCY3 KIAA0511	HP:0000005	Mode of inheritance
118	ADD1 ADDA	HP:0000005	Mode of inheritance
125	ADH1B ADH2	HP:0000005	Mode of inheritance
126	ADH1C ADH3	HP:0000005	Mode of inheritance
128	ADH5 ADHX FDH	HP:0000005	Mode of inheritance
154	ADRB2 ADRB2R B2AR	HP:0000005	Mode of inheritance
155	ADRB3 ADRB3R B3AR	HP:0000005	Mode of inheritance
162	AP1B1 ADTB1 BAM22 CLAPB2	HP:0000005	Mode of inheritance
181	AGRP AGRT ART	HP:0000005	Mode of inheritance
240	ALOX5 LOG5	HP:0000005	Mode of inheritance
241	ALOX5AP FLAP	HP:0000005	Mode of inheritance
308	ANXA5 ANX5 ENX2 PP4	HP:0000005	Mode of inheritance
336	APOA2	HP:0000005	Mode of inheritance
387	RHOA ARH12 ARHA RHO12	HP:0000005	Mode of inheritance
399	RHOH ARHH TTF	HP:0000005	Mode of inheritance
402	ARL2	HP:0000005	Mode of inheritance
491	ATP2B2 PMCA2	HP:0000005	Mode of inheritance
580	BARD1	HP:0000005	Mode of inheritance
581	BAX BCL2L4	HP:0000005	Mode of inheritance
587	BCAT2 BCATM BCT2 ECA40	HP:0000005	Mode of inheritance
590	BCHE CHE1	HP:0000005	Mode of inheritance
595	CCND1 BCL1 PRAD1	HP:0000005	Mode of inheritance
629	CFB BF BFD	HP:0000005	Mode of inheritance
646	BNC1 BNC	HP:0000005	Mode of inheritance
699	BUB1 BUB1L	HP:0000005	Mode of inheritance
738	VPS51 ANG2 C11orf2 C11orf3 FFR PP5382	HP:0000005	Mode of inheritance
799	CALCR	HP:0000005	Mode of inheritance
818	CAMK2G CAMK CAMK-II CAMKG	HP:0000005	Mode of inheritance
833	CARS1 CARS	HP:0000005	Mode of inheritance
899	CCNF FBX1 FBXO1	HP:0000005	Mode of inheritance
1000	CDH2 CDHN NCAD	HP:0000005	Mode of inheritance
1019	CDK4	HP:0000005	Mode of inheritance
1024	CDK8	HP:0000005	Mode of inheritance
1066	CES1 CES2 SES1	HP:0000005	Mode of inheritance
1109	AKR1C4 CHDR	HP:0000005	Mode of inheritance
1116	CHI3L1	HP:0000005	Mode of inheritance
1136	CHRNA3 NACHRA3	HP:0000005	Mode of inheritance
1173	AP2M1 CLAPM1 KIAA0109	HP:0000005	Mode of inheritance
1267	CNP	HP:0000005	Mode of inheritance
1290	COL5A2	HP:0000005	Mode of inheritance
1312	COMT	HP:0000005	Mode of inheritance
1314	COPA	HP:0000005	Mode of inheritance
1327	COX4I1 COX4	HP:0000005	Mode of inheritance
1339	COX6A2 COX6A COX6AH	HP:0000005	Mode of inheritance
1407	CRY1 PHLL1	HP:0000005	Mode of inheritance
1460	CSNK2B CK2N G5A	HP:0000005	Mode of inheritance
1468	SLC25A10 DIC	HP:0000005	Mode of inheritance
1474	CST6	HP:0000005	Mode of inheritance
1576	CYP3A4 CYP3A3	HP:0000005	Mode of inheritance
1577	CYP3A5	HP:0000005	Mode of inheritance
1638	DCT TYRP2	HP:0000005	Mode of inheritance
1656	DDX6 HLR2 RCK	HP:0000005	Mode of inheritance
1725	DHPS DS	HP:0000005	Mode of inheritance
1742	DLG4 PSD95	HP:0000005	Mode of inheritance
1743	DLST DLTS	HP:0000005	Mode of inheritance
1769	DNAH8	HP:0000005	Mode of inheritance
1773	DNASE1 DNL1 DRNI	HP:0000005	Mode of inheritance
1781	DYNC1I2 DNCI2 DNCIC2	HP:0000005	Mode of inheritance
1814	DRD3	HP:0000005	Mode of inheritance
1816	DRD5 DRD1B DRD1L2	HP:0000005	Mode of inheritance
1981	EIF4G1 EIF4F EIF4G EIF4GI	HP:0000005	Mode of inheritance
2048	EPHB2 DRT EPHT3 EPTH3 ERK HEK5 TYRO5	HP:0000005	Mode of inheritance
2053	EPHX2	HP:0000005	Mode of inheritance
2193	FARSA FARS FARSL FARSLA	HP:0000005	Mode of inheritance
2206	MS4A2 APY FCER1B IGER	HP:0000005	Mode of inheritance
2212	FCGR2A CD32 FCG2 FCGR2A1 IGFR2	HP:0000005	Mode of inheritance
2213	FCGR2B CD32 FCG2 IGFR2	HP:0000005	Mode of inheritance
2222	FDFT1	HP:0000005	Mode of inheritance
2302	FOXJ1 FKHL13 HFH4	HP:0000005	Mode of inheritance
2487	FRZB FIZ FRE FRP FRZB1 SFRP3	HP:0000005	Mode of inheritance
2555	GABRA2	HP:0000005	Mode of inheritance
2558	GABRA5	HP:0000005	Mode of inheritance
2563	GABRD	HP:0000005	Mode of inheritance
2590	GALNT2	HP:0000005	Mode of inheritance
2615	LRRC32 D11S833E	HP:0000005	Mode of inheritance
2692	GHRHR	HP:0000005	Mode of inheritance
2747	GLUD2 GLUDP1	HP:0000005	Mode of inheritance
2806	GOT2 KYAT4	HP:0000005	Mode of inheritance
2820	GPD2	HP:0000005	Mode of inheritance
2891	GRIA2 GLUR2	HP:0000005	Mode of inheritance
2917	GRM7 GPRC1G MGLUR7	HP:0000005	Mode of inheritance
2936	GSR GLUR GRD1	HP:0000005	Mode of inheritance
3026	HABP2 HGFAL PHBP	HP:0000005	Mode of inheritance
3067	HDC	HP:0000005	Mode of inheritance
3071	NCKAP1L HEM1	HP:0000005	Mode of inheritance
3078	CFHR1 CFHL CFHL1 CFHL1P CFHR1P FHR1 HFL1 HFL2	HP:0000005	Mode of inheritance
3119	HLA-DQB1 HLA-DQB	HP:0000005	Mode of inheritance
3135	HLA-G HLA-6.0 HLAG	HP:0000005	Mode of inheritance
3159	HMGA1 HMGIY	HP:0000005	Mode of inheritance
3161	HMMR IHABP RHAMM	HP:0000005	Mode of inheritance
3356	HTR2A HTR2	HP:0000005	Mode of inheritance
3417	IDH1 PICD	HP:0000005	Mode of inheritance
3419	IDH3A	HP:0000005	Mode of inheritance
3458	IFNG	HP:0000005	Mode of inheritance
3553	IL1B IL1F2	HP:0000005	Mode of inheritance
3560	IL2RB IL15RB	HP:0000005	Mode of inheritance
3566	IL4R IL4RA 582J2.1	HP:0000005	Mode of inheritance
3569	IL6 IFNB2	HP:0000005	Mode of inheritance
3570	IL6R	HP:0000005	Mode of inheritance
3572	IL6ST	HP:0000005	Mode of inheritance
3574	IL7	HP:0000005	Mode of inheritance
3596	IL13 NC30	HP:0000005	Mode of inheritance
3658	IREB2	HP:0000005	Mode of inheritance
3661	IRF3	HP:0000005	Mode of inheritance
3667	IRS1	HP:0000005	Mode of inheritance
3710	ITPR3	HP:0000005	Mode of inheritance
3716	JAK1 JAK1A JAK1B	HP:0000005	Mode of inheritance
3779	KCNMB1	HP:0000005	Mode of inheritance
3782	KCNN3 K3	HP:0000005	Mode of inheritance
3853	KRT6A K6A KRT6D	HP:0000005	Mode of inheritance
3953	LEPR DB OBR	HP:0000005	Mode of inheritance
4007	PRICKLE3 LMO6	HP:0000005	Mode of inheritance
4009	LMX1A	HP:0000005	Mode of inheritance
4016	LOXL1 LOXL	HP:0000005	Mode of inheritance
4081	MAB21L1 CAGR1 Nbla00126	HP:0000005	Mode of inheritance
4092	SMAD7 MADH7 MADH8	HP:0000005	Mode of inheritance
4131	MAP1B	HP:0000005	Mode of inheritance
4149	MAX BHLHD4	HP:0000005	Mode of inheritance
4153	MBL2 COLEC1 MBL	HP:0000005	Mode of inheritance
4157	MC1R MSHR	HP:0000005	Mode of inheritance
4160	MC4R	HP:0000005	Mode of inheritance
4163	MCC	HP:0000005	Mode of inheritance
4179	CD46 MCP MIC10	HP:0000005	Mode of inheritance
4190	MDH1 MDHA	HP:0000005	Mode of inheritance
4193	MDM2	HP:0000005	Mode of inheritance
4194	MDM4 MDMX	HP:0000005	Mode of inheritance
4205	MEF2A MEF2	HP:0000005	Mode of inheritance
4312	MMP1 CLG	HP:0000005	Mode of inheritance
4363	ABCC1 MRP MRP1	HP:0000005	Mode of inheritance
4486	MST1R PTK8 RON	HP:0000005	Mode of inheritance
4544	MTNR1B	HP:0000005	Mode of inheritance
4589	MUC7 MG2	HP:0000005	Mode of inheritance
4632	MYL1	HP:0000005	Mode of inheritance
4654	MYOD1 BHLHC1 MYF3 MYOD	HP:0000005	Mode of inheritance
4659	PPP1R12A MBS MYPT1	HP:0000005	Mode of inheritance
4677	NARS1 NARS NRS	HP:0000005	Mode of inheritance
4697	NDUFA4	HP:0000005	Mode of inheritance
4716	NDUFB10	HP:0000005	Mode of inheritance
4718	NDUFC2 HLC1	HP:0000005	Mode of inheritance
4796	TONSL IKBR NFKBIL2	HP:0000005	Mode of inheritance
4835	NQO2 NMOR2	HP:0000005	Mode of inheritance
4846	NOS3	HP:0000005	Mode of inheritance
4848	CNOT2 CDC36 NOT2 HSPC131 MSTP046	HP:0000005	Mode of inheritance
4849	CNOT3 KIAA0691 LENG2 NOT3	HP:0000005	Mode of inheritance
4858	NOVA2 ANOVA NOVA3	HP:0000005	Mode of inheritance
4927	NUP88	HP:0000005	Mode of inheritance
4953	ODC1	HP:0000005	Mode of inheritance
5133	PDCD1 PD1	HP:0000005	Mode of inheritance
5138	PDE2A	HP:0000005	Mode of inheritance
5188	GATB PET112 PET112L HSPC199	HP:0000005	Mode of inheritance
5245	PHB PHB1	HP:0000005	Mode of inheritance
5317	PKP1	HP:0000005	Mode of inheritance
5320	PLA2G2A PLA2B PLA2L RASF-A	HP:0000005	Mode of inheritance
5321	PLA2G4A CPLA2 PLA2G4	HP:0000005	Mode of inheritance
5331	PLCB3	HP:0000005	Mode of inheritance
5357	PLS1	HP:0000005	Mode of inheritance
5455	POU3F3 BRN1 OTF8	HP:0000005	Mode of inheritance
5567	PRKACB	HP:0000005	Mode of inheritance
5583	PRKCH PKCL PRKCL	HP:0000005	Mode of inheritance
5594	MAPK1 ERK2 PRKM1 PRKM2	HP:0000005	Mode of inheritance
5605	MAP2K2 MEK2 MKK2 PRKMK2	HP:0000005	Mode of inheritance
5610	EIF2AK2 PKR PRKR	HP:0000005	Mode of inheritance
5630	PRPH NEF4 PRPH1	HP:0000005	Mode of inheritance
5645	PRSS2 TRY2 TRYP2	HP:0000005	Mode of inheritance
5699	PSMB10 LMP10 MECL1	HP:0000005	Mode of inheritance
5732	PTGER2	HP:0000005	Mode of inheritance
5770	PTPN1 PTP1B	HP:0000005	Mode of inheritance
5782	PTPN12	HP:0000005	Mode of inheritance
5795	PTPRJ DEP1	HP:0000005	Mode of inheritance
5833	PCYT2	HP:0000005	Mode of inheritance
5880	RAC2	HP:0000005	Mode of inheritance
5881	RAC3	HP:0000005	Mode of inheritance
5903	RANBP2 NUP358	HP:0000005	Mode of inheritance
6096	RORB NR1F2 RZRB	HP:0000005	Mode of inheritance
6137	RPL13 BBC1 OK/SW-cl.46	HP:0000005	Mode of inheritance
6182	MRPL12 MRPL7 RPML12	HP:0000005	Mode of inheritance
6347	CCL2 MCP1 SCYA2	HP:0000005	Mode of inheritance
6356	CCL11 SCYA11	HP:0000005	Mode of inheritance
6472	SHMT2	HP:0000005	Mode of inheritance
6532	SLC6A4 HTT SERT	HP:0000005	Mode of inheritance
6558	SLC12A2 NKCC1	HP:0000005	Mode of inheritance
6602	SMARCD1 BAF60A	HP:0000005	Mode of inheritance
6652	SORD	HP:0000005	Mode of inheritance
6659	SOX4	HP:0000005	Mode of inheritance
6720	SREBF1 BHLHD1 SREBP1	HP:0000005	Mode of inheritance
6742	SSBP1 SSBP	HP:0000005	Mode of inheritance
6777	STAT5B	HP:0000005	Mode of inheritance
6790	AURKA AIK AIRK1 ARK1 AURA AYK1 BTAK IAK1 STK15 STK6	HP:0000005	Mode of inheritance
6840	SVIL	HP:0000005	Mode of inheritance
6844	VAMP2 SYB2	HP:0000005	Mode of inheritance
6854	SYN2	HP:0000005	Mode of inheritance
6897	TARS1 TARS	HP:0000005	Mode of inheritance
6907	TBL1X TBL1	HP:0000005	Mode of inheritance
6915	TBXA2R	HP:0000005	Mode of inheritance
6934	TCF7L2 TCF4	HP:0000005	Mode of inheritance
6942	TCF20 KIAA0292 SPBP	HP:0000005	Mode of inheritance
7056	THBD THRM	HP:0000005	Mode of inheritance
7097	TLR2 TIL4	HP:0000005	Mode of inheritance
7098	TLR3	HP:0000005	Mode of inheritance
7124	TNF TNFA TNFSF2	HP:0000005	Mode of inheritance
7140	TNNT3	HP:0000005	Mode of inheritance
7172	TPMT	HP:0000005	Mode of inheritance
7201	TRHR	HP:0000005	Mode of inheritance
7352	UCP3 SLC25A9	HP:0000005	Mode of inheritance
7358	UGDH	HP:0000005	Mode of inheritance
7360	UGP2 UGP1	HP:0000005	Mode of inheritance
7386	UQCRFS1	HP:0000005	Mode of inheritance
7453	WARS1 IFI53 WARS WRS	HP:0000005	Mode of inheritance
7517	XRCC3	HP:0000005	Mode of inheritance
7701	ZNF142 KIAA0236	HP:0000005	Mode of inheritance
7703	PCGF2 MEL18 RNF110 ZNF144	HP:0000005	Mode of inheritance
7874	USP7 HAUSP	HP:0000005	Mode of inheritance
8087	FXR1	HP:0000005	Mode of inheritance
8295	TRRAP PAF400	HP:0000005	Mode of inheritance
8402	SLC25A11 SLC20A4	HP:0000005	Mode of inheritance
8405	SPOP	HP:0000005	Mode of inheritance
8438	RAD54L RAD54A	HP:0000005	Mode of inheritance
8449	DHX16 DBP2 DDX16 KIAA0577 PRP2	HP:0000005	Mode of inheritance
8471	IRS4	HP:0000005	Mode of inheritance
8542	APOL1 APOL	HP:0000005	Mode of inheritance
8560	DEGS1 DES1 MLD MIG15	HP:0000005	Mode of inheritance
8567	MADD DENN IG20 KIAA0358	HP:0000005	Mode of inheritance
8572	PDLIM4 RIL	HP:0000005	Mode of inheritance
8632	DNAH17 DNAHL1 DNEL2	HP:0000005	Mode of inheritance
8660	IRS2	HP:0000005	Mode of inheritance
8720	MBTPS1 KIAA0091 S1P SKI1	HP:0000005	Mode of inheritance
8884	SLC5A6 SMVT	HP:0000005	Mode of inheritance
8936	WASF1 KIAA0269 SCAR1 WAVE1	HP:0000005	Mode of inheritance
9080	CLDN9	HP:0000005	Mode of inheritance
9091	PIGQ GPI1	HP:0000005	Mode of inheritance
9130	FAM50A DXS9928E HXC26 XAP5	HP:0000005	Mode of inheritance
9147	NEMF SDCCAG1	HP:0000005	Mode of inheritance
9254	CACNA2D2 KIAA0558	HP:0000005	Mode of inheritance
9365	KL	HP:0000005	Mode of inheritance
9371	KIF3B KIAA0359	HP:0000005	Mode of inheritance
9377	COX5A	HP:0000005	Mode of inheritance
9394	HS6ST1 HS6ST	HP:0000005	Mode of inheritance
9479	MAPK8IP1 IB1 JIP1 PRKM8IP	HP:0000005	Mode of inheritance
9488	PIGB	HP:0000005	Mode of inheritance
9562	MINPP1 MIPP UNQ900/PRO1917	HP:0000005	Mode of inheritance
9607	CARTPT CART	HP:0000005	Mode of inheritance
9653	HS2ST1 HS2ST KIAA0448	HP:0000005	Mode of inheritance
9672	SDC3 KIAA0468	HP:0000005	Mode of inheritance
9693	RAPGEF2 KIAA0313 NRAPGEP PDZGEF1	HP:0000005	Mode of inheritance
9699	RIMS2 KIAA0751 RAB3IP3 RIM2	HP:0000005	Mode of inheritance
9722	NOS1AP CAPON KIAA0464	HP:0000005	Mode of inheritance
9725	TMEM63A KIAA0489 KIAA0792	HP:0000005	Mode of inheritance
9739	SETD1A KIAA0339 KMT2F SET1 SET1A	HP:0000005	Mode of inheritance
9759	HDAC4 KIAA0288	HP:0000005	Mode of inheritance
9922	IQSEC1 ARFGEP100 BRAG2 KIAA0763	HP:0000005	Mode of inheritance
9948	WDR1	HP:0000005	Mode of inheritance
9969	MED13 ARC250 KIAA0593 THRAP1 TRAP240	HP:0000005	Mode of inheritance
10026	PIGK GPI8	HP:0000005	Mode of inheritance
10068	IL18BP	HP:0000005	Mode of inheritance
10075	HUWE1 KIAA0312 KIAA1578 UREB1 HSPC272	HP:0000005	Mode of inheritance
10125	RASGRP1 RASGRP	HP:0000005	Mode of inheritance
10137	RBM12 KIAA0765 HRIHFB2091	HP:0000005	Mode of inheritance
10203	CALCRL CGRPR	HP:0000005	Mode of inheritance
10220	GDF11 BMP11	HP:0000005	Mode of inheritance
10253	SPRY2	HP:0000005	Mode of inheritance
10299	MARCHF6 KIAA0597 MARCH6 RNF176 TEB4	HP:0000005	Mode of inheritance
10347	ABCA7	HP:0000005	Mode of inheritance
10371	SEMA3A SEMAD	HP:0000005	Mode of inheritance
10379	IRF9 ISGF3G	HP:0000005	Mode of inheritance
10388	SYCP2 SCP2	HP:0000005	Mode of inheritance
10501	SEMA6B SEMAN SEMAZ UNQ1907/PRO4353	HP:0000005	Mode of inheritance
10524	KAT5 HTATIP TIP60	HP:0000005	Mode of inheritance
10625	IVNS1ABP ARA3 FLARA3 KIAA0850 KLHL39 NS1 NS1BP HSPC068	HP:0000005	Mode of inheritance
10644	IGF2BP2 IMP2 VICKZ2	HP:0000005	Mode of inheritance
10651	MTX2	HP:0000005	Mode of inheritance
10677	AVIL	HP:0000005	Mode of inheritance
10716	TBR1	HP:0000005	Mode of inheritance
10750	GRAP	HP:0000005	Mode of inheritance
10755	GIPC1 C19orf3 GIPC RGS19IP1	HP:0000005	Mode of inheritance
10842	PPP1R17 C7orf16 GSBS	HP:0000005	Mode of inheritance
10844	TUBGCP2 GCP2	HP:0000005	Mode of inheritance
10878	CFHR3 CFHL3 FHR3	HP:0000005	Mode of inheritance
10943	MSL3 MSL3L1	HP:0000005	Mode of inheritance
11014	KDELR2 ERD2.2	HP:0000005	Mode of inheritance
11216	AKAP10	HP:0000005	Mode of inheritance
11224	RPL35	HP:0000005	Mode of inheritance
11261	CHP1 CHP	HP:0000005	Mode of inheritance
11281	POU6F2 RPF1	HP:0000005	Mode of inheritance
11330	CTRC CLCR	HP:0000005	Mode of inheritance
22800	RRAS2 TC21	HP:0000005	Mode of inheritance
22808	MRAS RRAS3	HP:0000005	Mode of inheritance
22871	NLGN1 KIAA1070	HP:0000005	Mode of inheritance
22872	SEC31A KIAA0905 SEC31L1 HSPC275 HSPC334	HP:0000005	Mode of inheritance
22873	DZIP1 DZIP DZIP2 KIAA0996	HP:0000005	Mode of inheritance
22884	WDR37 KIAA0982	HP:0000005	Mode of inheritance
22900	CARD8 KIAA0955 NDPP1	HP:0000005	Mode of inheritance
23019	CNOT1 CDC39 KIAA1007 NOT1 AD-005	HP:0000005	Mode of inheritance
23022	PALLD KIAA0992 CGI-151	HP:0000005	Mode of inheritance
23067	SETD1B KIAA1076 KMT2G SET1B	HP:0000005	Mode of inheritance
23097	CDK19 CDC2L6 CDK11 KIAA1028	HP:0000005	Mode of inheritance
23135	KDM6B JMJD3 KIAA0346	HP:0000005	Mode of inheritance
23155	CLCC1 KIAA0761 MCLC	HP:0000005	Mode of inheritance
23162	MAPK8IP3 JIP3 KIAA1066	HP:0000005	Mode of inheritance
23184	MESD KIAA0081 MESDC2 MESDM UNQ1911/PRO4369	HP:0000005	Mode of inheritance
23233	EXOC6B KIAA0919 SEC15B SEC15L2	HP:0000005	Mode of inheritance
23262	PPIP5K2 HISPPD1 KIAA0433 VIP2	HP:0000005	Mode of inheritance
23265	EXOC7 EXO70 KIAA1067	HP:0000005	Mode of inheritance
23268	DNMBP ARHGEF36 KIAA1010 TUBA	HP:0000005	Mode of inheritance
23291	FBXW11 BTRCP2 FBW1B FBXW1B KIAA0696	HP:0000005	Mode of inheritance
23446	SLC44A1 CD92 CDW92 CTL1	HP:0000005	Mode of inheritance
23511	NUP188 KIAA0169	HP:0000005	Mode of inheritance
23512	SUZ12 CHET9 JJAZ1 KIAA0160	HP:0000005	Mode of inheritance
23761	PISD	HP:0000005	Mode of inheritance
23780	APOL2	HP:0000005	Mode of inheritance
24145	PANX1 MRS1 UNQ2529/PRO6028	HP:0000005	Mode of inheritance
25788	RAD54B	HP:0000005	Mode of inheritance
25871	NEPRO C3orf17	HP:0000005	Mode of inheritance
25913	POT1	HP:0000005	Mode of inheritance
25930	PTPN23 KIAA1471	HP:0000005	Mode of inheritance
25973	PARS2	HP:0000005	Mode of inheritance
26007	TKFC DAK	HP:0000005	Mode of inheritance
26058	GIGYF2 KIAA0642 PERQ2 TNRC15	HP:0000005	Mode of inheritance
26060	APPL1 APPL DIP13A KIAA1428	HP:0000005	Mode of inheritance
26100	WIPI2 CGI-50	HP:0000005	Mode of inheritance
26115	TANC2 KIAA1148 KIAA1636	HP:0000005	Mode of inheritance
26173	INTS1 KIAA1440 UNQ1821/PRO3434	HP:0000005	Mode of inheritance
26191	PTPN22 PTPN8	HP:0000005	Mode of inheritance
26224	FBXL3 FBL3A FBXL3A	HP:0000005	Mode of inheritance
26511	CHIC2 BTL	HP:0000005	Mode of inheritance
26960	NBEA BCL8B KIAA1544 LYST2	HP:0000005	Mode of inheritance
27022	FOXD3 HFH2	HP:0000005	Mode of inheritance
27161	AGO2 EIF2C2	HP:0000005	Mode of inheritance
27327	TNRC6A CAGH26 KIAA1460 TNRC6	HP:0000005	Mode of inheritance
28514	DLL1 UNQ146/PRO172	HP:0000005	Mode of inheritance
28957	MRPS28 MRPS35 HSPC007	HP:0000005	Mode of inheritance
28958	COA3 CCDC56 MITRAC12 HSPC009	HP:0000005	Mode of inheritance
29081	METTL5 DC3 HSPC133	HP:0000005	Mode of inheritance
29894	CPSF1 CPSF160	HP:0000005	Mode of inheritance
29895	MYLPF	HP:0000005	Mode of inheritance
29928	TIMM22 TEX4 TIM22	HP:0000005	Mode of inheritance
29960	MRM2 FJH1 FTSJ2	HP:0000005	Mode of inheritance
29967	LRP12 ST7	HP:0000005	Mode of inheritance
50801	KCNK4 TRAAK	HP:0000005	Mode of inheritance
51075	TMX2 TXNDC14 CGI-31 My009 PIG26 PSEC0045 UNQ237/PRO270	HP:0000005	Mode of inheritance
51271	UBAP1 NAG20	HP:0000005	Mode of inheritance
51284	TLR7 UNQ248/PRO285	HP:0000005	Mode of inheritance
51317	PHF21A BHC80 KIAA1696 BM-006	HP:0000005	Mode of inheritance
51319	RSRC1 SRRP53 BM-011	HP:0000005	Mode of inheritance
51399	TRAPPC4 SBDN CGI-104 HSPC172 PTD009	HP:0000005	Mode of inheritance
51412	ACTL6B ACTL6 BAF53B	HP:0000005	Mode of inheritance
51428	DDX41 ABS	HP:0000005	Mode of inheritance
51603	EEF1AKNMT KIAA0859 METTL13 CGI-01	HP:0000005	Mode of inheritance
51649	MRPS23 CGI-138 HSPC329	HP:0000005	Mode of inheritance
51738	GHRL MTLRP UNQ524/PRO1066	HP:0000005	Mode of inheritance
51780	KDM3B C5orf7 JHDM2B JMJD1B KIAA1082	HP:0000005	Mode of inheritance
54209	TREM2	HP:0000005	Mode of inheritance
54413	NLGN3 KIAA1480 NL3	HP:0000005	Mode of inheritance
54538	ROBO4 UNQ421/PRO3674	HP:0000005	Mode of inheritance
54681	P4HTM PH4	HP:0000005	Mode of inheritance
54766	BTG4 PC3B	HP:0000005	Mode of inheritance
54796	BNC2	HP:0000005	Mode of inheritance
54822	TRPM7 CHAK1 LTRPC7	HP:0000005	Mode of inheritance
54829	ASPN PLAP1 SLRR1C UNQ215/PRO241	HP:0000005	Mode of inheritance
54834	GDAP2	HP:0000005	Mode of inheritance
54885	TBC1D8B	HP:0000005	Mode of inheritance
54892	NCAPG2 LUZP5	HP:0000005	Mode of inheritance
54970	TTC12	HP:0000005	Mode of inheritance
54974	THG1L ICF45	HP:0000005	Mode of inheritance
55012	PPP2R3C C14orf10 G5PR	HP:0000005	Mode of inheritance
55037	PTCD3 MRPS39 TRG15	HP:0000005	Mode of inheritance
55074	OXR1 Nbla00307	HP:0000005	Mode of inheritance
55152	DALRD3	HP:0000005	Mode of inheritance
55191	NADSYN1	HP:0000005	Mode of inheritance
55217	TMLHE TMLH	HP:0000005	Mode of inheritance
55270	NUDT15 MTH2	HP:0000005	Mode of inheritance
55278	QRSL1	HP:0000005	Mode of inheritance
55329	MNS1	HP:0000005	Mode of inheritance
55553	SOX6	HP:0000005	Mode of inheritance
55596	ZCCHC8	HP:0000005	Mode of inheritance
55617	TASP1 C20orf13	HP:0000005	Mode of inheritance
55627	SMPD4 KIAA1418 SKNY	HP:0000005	Mode of inheritance
55654	TMEM127	HP:0000005	Mode of inheritance
55656	INTS8 C8orf52	HP:0000005	Mode of inheritance
55681	SCYL2 CVAK104 KIAA1360	HP:0000005	Mode of inheritance
55689	YEATS2 KIAA1197	HP:0000005	Mode of inheritance
55733	HHAT MART2 SKI1	HP:0000005	Mode of inheritance
55737	VPS35 MEM3 TCCCTA00141	HP:0000005	Mode of inheritance
55765	INAVA C1orf106	HP:0000005	Mode of inheritance
55790	CSGALNACT1 CHGN GALNACT1 UNQ656/PRO1287	HP:0000005	Mode of inheritance
55811	ADCY10 SAC	HP:0000005	Mode of inheritance
55904	KMT2E MLL5	HP:0000005	Mode of inheritance
56244	BTNL2	HP:0000005	Mode of inheritance
56729	RETN FIZZ3 HXCP1 RSTN UNQ407/PRO1199	HP:0000005	Mode of inheritance
56910	STARD7 GTT1	HP:0000005	Mode of inheritance
56984	PSMG2 HCCA3 PAC2 TNFSF5IP1	HP:0000005	Mode of inheritance
57020	VPS35L C16orf62 101F10.2	HP:0000005	Mode of inheritance
57178	ZMIZ1 KIAA1224 RAI17 ZIMP10	HP:0000005	Mode of inheritance
57522	SRGAP1 ARHGAP13 KIAA1304	HP:0000005	Mode of inheritance
57589	RIC1 CIP150 KIAA1432	HP:0000005	Mode of inheritance
57591	MRTFA KIAA1438 MAL MKL1	HP:0000005	Mode of inheritance
57647	DHX37 DDX37 KIAA1517	HP:0000005	Mode of inheritance
57670	KIAA1549	HP:0000005	Mode of inheritance
57674	RNF213 ALO17 C17orf27 KIAA1554 KIAA1618 MYSTR	HP:0000005	Mode of inheritance
57680	CHD8 HELSNF1 KIAA1564	HP:0000005	Mode of inheritance
58494	JAM2 C21orf43 VEJAM UNQ219/PRO245	HP:0000005	Mode of inheritance
58499	ZNF462 KIAA1803	HP:0000005	Mode of inheritance
60468	BACH2	HP:0000005	Mode of inheritance
60561	RINT1	HP:0000005	Mode of inheritance
63035	BCORL1	HP:0000005	Mode of inheritance
63915	BLOC1S5 MUTED	HP:0000005	Mode of inheritance
64065	PERP KCP1 KRTCAP1 PIGPC1 THW	HP:0000005	Mode of inheritance
64208	POPDC3 POP3	HP:0000005	Mode of inheritance
64359	NXN NRX	HP:0000005	Mode of inheritance
64376	IKZF5 ZNFN1A5	HP:0000005	Mode of inheritance
64419	MTMR14 C3orf29	HP:0000005	Mode of inheritance
64432	MRPS25 RPMS25	HP:0000005	Mode of inheritance
64682	ANAPC1 TSG24	HP:0000005	Mode of inheritance
64834	ELOVL1 SSC1 CGI-88	HP:0000005	Mode of inheritance
64849	SLC13A3 NADC3 SDCT2	HP:0000005	Mode of inheritance
65078	RTN4R NOGOR UNQ330/PRO526	HP:0000005	Mode of inheritance
65260	COA7 C1orf163 RESA1 SELRC1	HP:0000005	Mode of inheritance
79140	CCDC28B	HP:0000005	Mode of inheritance
79415	CYBC1 C17orf62 EROS	HP:0000005	Mode of inheritance
79574	EPS8L3 EPS8R3	HP:0000005	Mode of inheritance
79576	NKAP	HP:0000005	Mode of inheritance
79625	NDNF C4orf31 UNQ2748/PRO6487	HP:0000005	Mode of inheritance
79703	TOP6BL C11orf80	HP:0000005	Mode of inheritance
79853	TM4SF20 UNQ518/PRO994	HP:0000005	Mode of inheritance
79925	SPEF2 KIAA1770 KPL2	HP:0000005	Mode of inheritance
79966	SCD5 ACOD4 SCD2 SCD4	HP:0000005	Mode of inheritance
80114	BICC1	HP:0000005	Mode of inheritance
80152	CENPT C16orf56 ICEN22	HP:0000005	Mode of inheritance
80199	FUZ FY	HP:0000005	Mode of inheritance
80216	ALPK1 KIAA1527 LAK	HP:0000005	Mode of inheritance
80832	APOL4	HP:0000005	Mode of inheritance
81622	UNC93B1 UNC93 UNC93B	HP:0000005	Mode of inheritance
83872	HMCN1 FIBL6	HP:0000005	Mode of inheritance
83894	TTC29	HP:0000005	Mode of inheritance
84071	ARMC2	HP:0000005	Mode of inheritance
84138	SLC7A6OS	HP:0000005	Mode of inheritance
84148	KAT8 MOF MYST1 PP7073	HP:0000005	Mode of inheritance
84172	POLR1B	HP:0000005	Mode of inheritance
84274	COQ5	HP:0000005	Mode of inheritance
84340	GFM2 EFG2 MSTP027	HP:0000005	Mode of inheritance
84628	NTNG2 KIAA1857 LMNT2 UNQ9381/PRO34206	HP:0000005	Mode of inheritance
84833	ATP5MK ATP5MD DAPIT HCVFTP2 USMG5 PD04912	HP:0000005	Mode of inheritance
84842	HPDL GLOXD1	HP:0000005	Mode of inheritance
84868	HAVCR2 TIM3 TIMD3	HP:0000005	Mode of inheritance
84957	RELT TNFRSF19L	HP:0000005	Mode of inheritance
85015	USP45	HP:0000005	Mode of inheritance
85366	MYLK2	HP:0000005	Mode of inheritance
89874	SLC25A21 ODC	HP:0000005	Mode of inheritance
90161	HS6ST2 PSEC0092	HP:0000005	Mode of inheritance
90416	CCDC32 C15orf57	HP:0000005	Mode of inheritance
90522	YIF1B PP4519 UNQ3073/PRO9905	HP:0000005	Mode of inheritance
91452	ACBD5 KIAA1996	HP:0000005	Mode of inheritance
91461	PKDCC SGK493 VLK	HP:0000005	Mode of inheritance
91801	ALKBH8 ABH8	HP:0000005	Mode of inheritance
93649	MYOCD MYCD	HP:0000005	Mode of inheritance
112609	MRAP2 C6orf117	HP:0000005	Mode of inheritance
114327	EFHC1	HP:0000005	Mode of inheritance
116931	MED12L KIAA1635 TNRC11L TRALP TRALPUSH PRO0314	HP:0000005	Mode of inheritance
117156	SCGB3A2 PNSP1 UGRP1 UNQ566/PRO1128	HP:0000005	Mode of inheritance
118491	CFAP70 TTC18	HP:0000005	Mode of inheritance
120892	LRRK2 PARK8	HP:0000005	Mode of inheritance
124842	TMEM132E	HP:0000005	Mode of inheritance
124976	SPNS2	HP:0000005	Mode of inheritance
125170	MIEF2 MID49 SMCR7	HP:0000005	Mode of inheritance
128486	FITM2 C20orf142 FIT2	HP:0000005	Mode of inheritance
128869	PIGU CDC91L1 PSEC0205 UNQ3055/PRO9875	HP:0000005	Mode of inheritance
130340	AP1S3	HP:0000005	Mode of inheritance
130589	GALM BLOCK25	HP:0000005	Mode of inheritance
130951	M1AP C2orf65 SPATA37	HP:0000005	Mode of inheritance
131405	TRIM71 LIN41	HP:0000005	Mode of inheritance
139411	PTCHD1	HP:0000005	Mode of inheritance
144245	ALG10B KCR1	HP:0000005	Mode of inheritance
144568	A2ML1 CPAMD9	HP:0000005	Mode of inheritance
144811	LACC1 C13orf31 FAMIN	HP:0000005	Mode of inheritance
146754	DNAH2 DNAHC2 DNHD3 KIAA1503	HP:0000005	Mode of inheritance
147138	TMC8 EVER2 EVIN2	HP:0000005	Mode of inheritance
148022	TICAM1 PRVTIRB TRIF	HP:0000005	Mode of inheritance
149371	EXOC8	HP:0000005	Mode of inheritance
150365	MEI1	HP:0000005	Mode of inheritance
151516	ASPRV1 SASP	HP:0000005	Mode of inheritance
152110	NEK10	HP:0000005	Mode of inheritance
159686	CFAP58 C10orf80 CCDC147	HP:0000005	Mode of inheritance
166929	SGMS2 SMS2	HP:0000005	Mode of inheritance
169026	SLC30A8 ZNT8	HP:0000005	Mode of inheritance
170825	GSX2 GSH2	HP:0000005	Mode of inheritance
199223	TTC21A STI2	HP:0000005	Mode of inheritance
200424	TET3 KIAA0401	HP:0000005	Mode of inheritance
200942	KLHDC8B FP17659	HP:0000005	Mode of inheritance
201134	CEP112 CCDC46	HP:0000005	Mode of inheritance
246176	GAS2L2 GAR17	HP:0000005	Mode of inheritance
253959	RALGAPA1 GARNL1 KIAA0884 TULIP1	HP:0000005	Mode of inheritance
255101	CFAP65 CCDC108	HP:0000005	Mode of inheritance
267012	DAOA G72	HP:0000005	Mode of inheritance
283459	GATC 15E1.2	HP:0000005	Mode of inheritance
283677	REC114 C15orf60	HP:0000005	Mode of inheritance
284184	NDUFAF8 C17orf89	HP:0000005	Mode of inheritance
284439	SLC25A42	HP:0000005	Mode of inheritance
285282	RABL3	HP:0000005	Mode of inheritance
285600	KIAA0825 C5orf36	HP:0000005	Mode of inheritance
317662	FAM149B1 KIAA0974	HP:0000005	Mode of inheritance
317761	SIX6OS1 C14orf39	HP:0000005	Mode of inheritance
338567	KCNK18 TRESK TRIK	HP:0000005	Mode of inheritance
341208	HEPHL1	HP:0000005	Mode of inheritance
345643	MCIDAS IDAS MCI MCIN	HP:0000005	Mode of inheritance
374969	SVBP CCDC23	HP:0000005	Mode of inheritance
375387	NRROS LRRC33 UNQ3030/PRO9833	HP:0000005	Mode of inheritance
387119	CEP85L C6orf204	HP:0000005	Mode of inheritance
645104	CLRN2	HP:0000005	Mode of inheritance
727897	MUC5B MUC5	HP:0000005	Mode of inheritance
100134444	KCNJ18	HP:0000005	Mode of inheritance
100303755	PET117 UNQ607/PRO1194	HP:0000005	Mode of inheritance
51	ACOX1 ACOX	HP:0000006	Autosomal dominant inheritance
126	ADH1C ADH3	HP:0000006	Autosomal dominant inheritance
154	ADRB2 ADRB2R B2AR	HP:0000006	Autosomal dominant inheritance
155	ADRB3 ADRB3R B3AR	HP:0000006	Autosomal dominant inheritance
181	AGRP AGRT ART	HP:0000006	Autosomal dominant inheritance
240	ALOX5 LOG5	HP:0000006	Autosomal dominant inheritance
308	ANXA5 ANX5 ENX2 PP4	HP:0000006	Autosomal dominant inheritance
336	APOA2	HP:0000006	Autosomal dominant inheritance
367	AR DHTR NR3C4	HP:0000006	Autosomal dominant inheritance
402	ARL2	HP:0000006	Autosomal dominant inheritance
472	ATM	HP:0000006	Autosomal dominant inheritance
580	BARD1	HP:0000006	Autosomal dominant inheritance
581	BAX BCL2L4	HP:0000006	Autosomal dominant inheritance
595	CCND1 BCL1 PRAD1	HP:0000006	Autosomal dominant inheritance
629	CFB BF BFD	HP:0000006	Autosomal dominant inheritance
646	BNC1 BNC	HP:0000006	Autosomal dominant inheritance
699	BUB1 BUB1L	HP:0000006	Autosomal dominant inheritance
718	C3 CPAMD1	HP:0000006	Autosomal dominant inheritance
799	CALCR	HP:0000006	Autosomal dominant inheritance
818	CAMK2G CAMK CAMK-II CAMKG	HP:0000006	Autosomal dominant inheritance
899	CCNF FBX1 FBXO1	HP:0000006	Autosomal dominant inheritance
1000	CDH2 CDHN NCAD	HP:0000006	Autosomal dominant inheritance
1019	CDK4	HP:0000006	Autosomal dominant inheritance
1024	CDK8	HP:0000006	Autosomal dominant inheritance
1066	CES1 CES2 SES1	HP:0000006	Autosomal dominant inheritance
1080	CFTR ABCC7	HP:0000006	Autosomal dominant inheritance
1116	CHI3L1	HP:0000006	Autosomal dominant inheritance
1173	AP2M1 CLAPM1 KIAA0109	HP:0000006	Autosomal dominant inheritance
1290	COL5A2	HP:0000006	Autosomal dominant inheritance
1312	COMT	HP:0000006	Autosomal dominant inheritance
1314	COPA	HP:0000006	Autosomal dominant inheritance
1407	CRY1 PHLL1	HP:0000006	Autosomal dominant inheritance
1460	CSNK2B CK2N G5A	HP:0000006	Autosomal dominant inheritance
1576	CYP3A4 CYP3A3	HP:0000006	Autosomal dominant inheritance
1656	DDX6 HLR2 RCK	HP:0000006	Autosomal dominant inheritance
1742	DLG4 PSD95	HP:0000006	Autosomal dominant inheritance
1743	DLST DLTS	HP:0000006	Autosomal dominant inheritance
1749	DLX5	HP:0000006	Autosomal dominant inheritance
1773	DNASE1 DNL1 DRNI	HP:0000006	Autosomal dominant inheritance
1814	DRD3	HP:0000006	Autosomal dominant inheritance
1816	DRD5 DRD1B DRD1L2	HP:0000006	Autosomal dominant inheritance
1981	EIF4G1 EIF4F EIF4G EIF4GI	HP:0000006	Autosomal dominant inheritance
2053	EPHX2	HP:0000006	Autosomal dominant inheritance
2065	ERBB3 HER3	HP:0000006	Autosomal dominant inheritance
2162	F13A1 F13A	HP:0000006	Autosomal dominant inheritance
2206	MS4A2 APY FCER1B IGER	HP:0000006	Autosomal dominant inheritance
2212	FCGR2A CD32 FCG2 FCGR2A1 IGFR2	HP:0000006	Autosomal dominant inheritance
2213	FCGR2B CD32 FCG2 IGFR2	HP:0000006	Autosomal dominant inheritance
2301	FOXE3 FKHL12 FREAC8	HP:0000006	Autosomal dominant inheritance
2302	FOXJ1 FKHL13 HFH4	HP:0000006	Autosomal dominant inheritance
2304	FOXE1 FKHL15 FOXE2 TITF2 TTF2	HP:0000006	Autosomal dominant inheritance
2555	GABRA2	HP:0000006	Autosomal dominant inheritance
2558	GABRA5	HP:0000006	Autosomal dominant inheritance
2563	GABRD	HP:0000006	Autosomal dominant inheritance
2628	GATM AGAT	HP:0000006	Autosomal dominant inheritance
2629	GBA GC GLUC	HP:0000006	Autosomal dominant inheritance
2747	GLUD2 GLUDP1	HP:0000006	Autosomal dominant inheritance
2820	GPD2	HP:0000006	Autosomal dominant inheritance
2891	GRIA2 GLUR2	HP:0000006	Autosomal dominant inheritance
3026	HABP2 HGFAL PHBP	HP:0000006	Autosomal dominant inheritance
3067	HDC	HP:0000006	Autosomal dominant inheritance
3077	HFE HLAH	HP:0000006	Autosomal dominant inheritance
3078	CFHR1 CFHL CFHL1 CFHL1P CFHR1P FHR1 HFL1 HFL2	HP:0000006	Autosomal dominant inheritance
3119	HLA-DQB1 HLA-DQB	HP:0000006	Autosomal dominant inheritance
3135	HLA-G HLA-6.0 HLAG	HP:0000006	Autosomal dominant inheritance
3159	HMGA1 HMGIY	HP:0000006	Autosomal dominant inheritance
3161	HMMR IHABP RHAMM	HP:0000006	Autosomal dominant inheritance
3176	HNMT	HP:0000006	Autosomal dominant inheritance
3356	HTR2A HTR2	HP:0000006	Autosomal dominant inheritance
3417	IDH1 PICD	HP:0000006	Autosomal dominant inheritance
3426	CFI IF	HP:0000006	Autosomal dominant inheritance
3458	IFNG	HP:0000006	Autosomal dominant inheritance
3553	IL1B IL1F2	HP:0000006	Autosomal dominant inheritance
3557	IL1RN IL1F3 IL1RA	HP:0000006	Autosomal dominant inheritance
3566	IL4R IL4RA 582J2.1	HP:0000006	Autosomal dominant inheritance
3569	IL6 IFNB2	HP:0000006	Autosomal dominant inheritance
3596	IL13 NC30	HP:0000006	Autosomal dominant inheritance
3661	IRF3	HP:0000006	Autosomal dominant inheritance
3667	IRS1	HP:0000006	Autosomal dominant inheritance
3716	JAK1 JAK1A JAK1B	HP:0000006	Autosomal dominant inheritance
3779	KCNMB1	HP:0000006	Autosomal dominant inheritance
3782	KCNN3 K3	HP:0000006	Autosomal dominant inheritance
3853	KRT6A K6A KRT6D	HP:0000006	Autosomal dominant inheritance
3990	LIPC HTGL	HP:0000006	Autosomal dominant inheritance
4009	LMX1A	HP:0000006	Autosomal dominant inheritance
4016	LOXL1 LOXL	HP:0000006	Autosomal dominant inheritance
4131	MAP1B	HP:0000006	Autosomal dominant inheritance
4149	MAX BHLHD4	HP:0000006	Autosomal dominant inheritance
4153	MBL2 COLEC1 MBL	HP:0000006	Autosomal dominant inheritance
4160	MC4R	HP:0000006	Autosomal dominant inheritance
4163	MCC	HP:0000006	Autosomal dominant inheritance
4179	CD46 MCP MIC10	HP:0000006	Autosomal dominant inheritance
4194	MDM4 MDMX	HP:0000006	Autosomal dominant inheritance
4205	MEF2A MEF2	HP:0000006	Autosomal dominant inheritance
4353	MPO	HP:0000006	Autosomal dominant inheritance
4363	ABCC1 MRP MRP1	HP:0000006	Autosomal dominant inheritance
4437	MSH3 DUC1 DUG	HP:0000006	Autosomal dominant inheritance
4486	MST1R PTK8 RON	HP:0000006	Autosomal dominant inheritance
4524	MTHFR	HP:0000006	Autosomal dominant inheritance
4544	MTNR1B	HP:0000006	Autosomal dominant inheritance
4547	MTTP MTP	HP:0000006	Autosomal dominant inheritance
4589	MUC7 MG2	HP:0000006	Autosomal dominant inheritance
4659	PPP1R12A MBS MYPT1	HP:0000006	Autosomal dominant inheritance
4677	NARS1 NARS NRS	HP:0000006	Autosomal dominant inheritance
4750	NEK1 KIAA1901	HP:0000006	Autosomal dominant inheritance
4835	NQO2 NMOR2	HP:0000006	Autosomal dominant inheritance
4846	NOS3	HP:0000006	Autosomal dominant inheritance
4848	CNOT2 CDC36 NOT2 HSPC131 MSTP046	HP:0000006	Autosomal dominant inheritance
4849	CNOT3 KIAA0691 LENG2 NOT3	HP:0000006	Autosomal dominant inheritance
4858	NOVA2 ANOVA NOVA3	HP:0000006	Autosomal dominant inheritance
4921	DDR2 NTRKR3 TKT TYRO10	HP:0000006	Autosomal dominant inheritance
4953	ODC1	HP:0000006	Autosomal dominant inheritance
5245	PHB PHB1	HP:0000006	Autosomal dominant inheritance
5320	PLA2G2A PLA2B PLA2L RASF-A	HP:0000006	Autosomal dominant inheritance
5357	PLS1	HP:0000006	Autosomal dominant inheritance
5426	POLE POLE1	HP:0000006	Autosomal dominant inheritance
5443	POMC	HP:0000006	Autosomal dominant inheritance
5455	POU3F3 BRN1 OTF8	HP:0000006	Autosomal dominant inheritance
5567	PRKACB	HP:0000006	Autosomal dominant inheritance
5594	MAPK1 ERK2 PRKM1 PRKM2	HP:0000006	Autosomal dominant inheritance
5605	MAP2K2 MEK2 MKK2 PRKMK2	HP:0000006	Autosomal dominant inheritance
5610	EIF2AK2 PKR PRKR	HP:0000006	Autosomal dominant inheritance
5625	PRODH PIG6 POX2 PRODH2	HP:0000006	Autosomal dominant inheritance
5630	PRPH NEF4 PRPH1	HP:0000006	Autosomal dominant inheritance
5645	PRSS2 TRY2 TRYP2	HP:0000006	Autosomal dominant inheritance
5770	PTPN1 PTP1B	HP:0000006	Autosomal dominant inheritance
5782	PTPN12	HP:0000006	Autosomal dominant inheritance
5795	PTPRJ DEP1	HP:0000006	Autosomal dominant inheritance
5880	RAC2	HP:0000006	Autosomal dominant inheritance
5881	RAC3	HP:0000006	Autosomal dominant inheritance
5903	RANBP2 NUP358	HP:0000006	Autosomal dominant inheritance
6096	RORB NR1F2 RZRB	HP:0000006	Autosomal dominant inheritance
6121	RPE65	HP:0000006	Autosomal dominant inheritance
6137	RPL13 BBC1 OK/SW-cl.46	HP:0000006	Autosomal dominant inheritance
6347	CCL2 MCP1 SCYA2	HP:0000006	Autosomal dominant inheritance
6356	CCL11 SCYA11	HP:0000006	Autosomal dominant inheritance
6514	SLC2A2 GLUT2	HP:0000006	Autosomal dominant inheritance
6532	SLC6A4 HTT SERT	HP:0000006	Autosomal dominant inheritance
6558	SLC12A2 NKCC1	HP:0000006	Autosomal dominant inheritance
6602	SMARCD1 BAF60A	HP:0000006	Autosomal dominant inheritance
6659	SOX4	HP:0000006	Autosomal dominant inheritance
6720	SREBF1 BHLHD1 SREBP1	HP:0000006	Autosomal dominant inheritance
6729	SRP54	HP:0000006	Autosomal dominant inheritance
6742	SSBP1 SSBP	HP:0000006	Autosomal dominant inheritance
6777	STAT5B	HP:0000006	Autosomal dominant inheritance
6790	AURKA AIK AIRK1 ARK1 AURA AYK1 BTAK IAK1 STK15 STK6	HP:0000006	Autosomal dominant inheritance
6844	VAMP2 SYB2	HP:0000006	Autosomal dominant inheritance
6854	SYN2	HP:0000006	Autosomal dominant inheritance
6862	TBXT T	HP:0000006	Autosomal dominant inheritance
6915	TBXA2R	HP:0000006	Autosomal dominant inheritance
6934	TCF7L2 TCF4	HP:0000006	Autosomal dominant inheritance
6942	TCF20 KIAA0292 SPBP	HP:0000006	Autosomal dominant inheritance
7056	THBD THRM	HP:0000006	Autosomal dominant inheritance
7097	TLR2 TIL4	HP:0000006	Autosomal dominant inheritance
7098	TLR3	HP:0000006	Autosomal dominant inheritance
7124	TNF TNFA TNFSF2	HP:0000006	Autosomal dominant inheritance
7140	TNNT3	HP:0000006	Autosomal dominant inheritance
7317	UBA1 A1S9T UBE1	HP:0000006	Autosomal dominant inheritance
7345	UCHL1	HP:0000006	Autosomal dominant inheritance
7352	UCP3 SLC25A9	HP:0000006	Autosomal dominant inheritance
7453	WARS1 IFI53 WARS WRS	HP:0000006	Autosomal dominant inheritance
7517	XRCC3	HP:0000006	Autosomal dominant inheritance
7703	PCGF2 MEL18 RNF110 ZNF144	HP:0000006	Autosomal dominant inheritance
7874	USP7 HAUSP	HP:0000006	Autosomal dominant inheritance
7941	PLA2G7 PAFAH	HP:0000006	Autosomal dominant inheritance
8295	TRRAP PAF400	HP:0000006	Autosomal dominant inheritance
8402	SLC25A11 SLC20A4	HP:0000006	Autosomal dominant inheritance
8405	SPOP	HP:0000006	Autosomal dominant inheritance
8438	RAD54L RAD54A	HP:0000006	Autosomal dominant inheritance
8449	DHX16 DBP2 DDX16 KIAA0577 PRP2	HP:0000006	Autosomal dominant inheritance
8456	FOXN1 RONU WHN	HP:0000006	Autosomal dominant inheritance
8572	PDLIM4 RIL	HP:0000006	Autosomal dominant inheritance
8660	IRS2	HP:0000006	Autosomal dominant inheritance
8737	RIPK1 RIP RIP1	HP:0000006	Autosomal dominant inheritance
8936	WASF1 KIAA0269 SCAR1 WAVE1	HP:0000006	Autosomal dominant inheritance
9371	KIF3B KIAA0359	HP:0000006	Autosomal dominant inheritance
9394	HS6ST1 HS6ST	HP:0000006	Autosomal dominant inheritance
9479	MAPK8IP1 IB1 JIP1 PRKM8IP	HP:0000006	Autosomal dominant inheritance
9562	MINPP1 MIPP UNQ900/PRO1917	HP:0000006	Autosomal dominant inheritance
9607	CARTPT CART	HP:0000006	Autosomal dominant inheritance
9672	SDC3 KIAA0468	HP:0000006	Autosomal dominant inheritance
9693	RAPGEF2 KIAA0313 NRAPGEP PDZGEF1	HP:0000006	Autosomal dominant inheritance
9725	TMEM63A KIAA0489 KIAA0792	HP:0000006	Autosomal dominant inheritance
9739	SETD1A KIAA0339 KMT2F SET1 SET1A	HP:0000006	Autosomal dominant inheritance
9759	HDAC4 KIAA0288	HP:0000006	Autosomal dominant inheritance
9969	MED13 ARC250 KIAA0593 THRAP1 TRAP240	HP:0000006	Autosomal dominant inheritance
10137	RBM12 KIAA0765 HRIHFB2091	HP:0000006	Autosomal dominant inheritance
10220	GDF11 BMP11	HP:0000006	Autosomal dominant inheritance
10253	SPRY2	HP:0000006	Autosomal dominant inheritance
10299	MARCHF6 KIAA0597 MARCH6 RNF176 TEB4	HP:0000006	Autosomal dominant inheritance
10347	ABCA7	HP:0000006	Autosomal dominant inheritance
10371	SEMA3A SEMAD	HP:0000006	Autosomal dominant inheritance
10501	SEMA6B SEMAN SEMAZ UNQ1907/PRO4353	HP:0000006	Autosomal dominant inheritance
10524	KAT5 HTATIP TIP60	HP:0000006	Autosomal dominant inheritance
10625	IVNS1ABP ARA3 FLARA3 KIAA0850 KLHL39 NS1 NS1BP HSPC068	HP:0000006	Autosomal dominant inheritance
10644	IGF2BP2 IMP2 VICKZ2	HP:0000006	Autosomal dominant inheritance
10716	TBR1	HP:0000006	Autosomal dominant inheritance
10755	GIPC1 C19orf3 GIPC RGS19IP1	HP:0000006	Autosomal dominant inheritance
10842	PPP1R17 C7orf16 GSBS	HP:0000006	Autosomal dominant inheritance
10878	CFHR3 CFHL3 FHR3	HP:0000006	Autosomal dominant inheritance
11216	AKAP10	HP:0000006	Autosomal dominant inheritance
11224	RPL35	HP:0000006	Autosomal dominant inheritance
11235	PDCD10 CCM3 TFAR15	HP:0000006	Autosomal dominant inheritance
11281	POU6F2 RPF1	HP:0000006	Autosomal dominant inheritance
11330	CTRC CLCR	HP:0000006	Autosomal dominant inheritance
22800	RRAS2 TC21	HP:0000006	Autosomal dominant inheritance
22808	MRAS RRAS3	HP:0000006	Autosomal dominant inheritance
22858	CILK1 ICK KIAA0936	HP:0000006	Autosomal dominant inheritance
22871	NLGN1 KIAA1070	HP:0000006	Autosomal dominant inheritance
22873	DZIP1 DZIP DZIP2 KIAA0996	HP:0000006	Autosomal dominant inheritance
22884	WDR37 KIAA0982	HP:0000006	Autosomal dominant inheritance
22900	CARD8 KIAA0955 NDPP1	HP:0000006	Autosomal dominant inheritance
23019	CNOT1 CDC39 KIAA1007 NOT1 AD-005	HP:0000006	Autosomal dominant inheritance
23022	PALLD KIAA0992 CGI-151	HP:0000006	Autosomal dominant inheritance
23067	SETD1B KIAA1076 KMT2G SET1B	HP:0000006	Autosomal dominant inheritance
23097	CDK19 CDC2L6 CDK11 KIAA1028	HP:0000006	Autosomal dominant inheritance
23135	KDM6B JMJD3 KIAA0346	HP:0000006	Autosomal dominant inheritance
23162	MAPK8IP3 JIP3 KIAA1066	HP:0000006	Autosomal dominant inheritance
23291	FBXW11 BTRCP2 FBW1B FBXW1B KIAA0696	HP:0000006	Autosomal dominant inheritance
23512	SUZ12 CHET9 JJAZ1 KIAA0160	HP:0000006	Autosomal dominant inheritance
23780	APOL2	HP:0000006	Autosomal dominant inheritance
24145	PANX1 MRS1 UNQ2529/PRO6028	HP:0000006	Autosomal dominant inheritance
25788	RAD54B	HP:0000006	Autosomal dominant inheritance
25913	POT1	HP:0000006	Autosomal dominant inheritance
26058	GIGYF2 KIAA0642 PERQ2 TNRC15	HP:0000006	Autosomal dominant inheritance
26060	APPL1 APPL DIP13A KIAA1428	HP:0000006	Autosomal dominant inheritance
26115	TANC2 KIAA1148 KIAA1636	HP:0000006	Autosomal dominant inheritance
26191	PTPN22 PTPN8	HP:0000006	Autosomal dominant inheritance
26511	CHIC2 BTL	HP:0000006	Autosomal dominant inheritance
26960	NBEA BCL8B KIAA1544 LYST2	HP:0000006	Autosomal dominant inheritance
27022	FOXD3 HFH2	HP:0000006	Autosomal dominant inheritance
27161	AGO2 EIF2C2	HP:0000006	Autosomal dominant inheritance
27235	COQ2 CL640	HP:0000006	Autosomal dominant inheritance
27327	TNRC6A CAGH26 KIAA1460 TNRC6	HP:0000006	Autosomal dominant inheritance
27429	HTRA2 OMI PRSS25	HP:0000006	Autosomal dominant inheritance
28514	DLL1 UNQ146/PRO172	HP:0000006	Autosomal dominant inheritance
29894	CPSF1 CPSF160	HP:0000006	Autosomal dominant inheritance
29895	MYLPF	HP:0000006	Autosomal dominant inheritance
29967	LRP12 ST7	HP:0000006	Autosomal dominant inheritance
50801	KCNK4 TRAAK	HP:0000006	Autosomal dominant inheritance
51271	UBAP1 NAG20	HP:0000006	Autosomal dominant inheritance
51317	PHF21A BHC80 KIAA1696 BM-006	HP:0000006	Autosomal dominant inheritance
51412	ACTL6B ACTL6 BAF53B	HP:0000006	Autosomal dominant inheritance
51428	DDX41 ABS	HP:0000006	Autosomal dominant inheritance
51603	EEF1AKNMT KIAA0859 METTL13 CGI-01	HP:0000006	Autosomal dominant inheritance
51738	GHRL MTLRP UNQ524/PRO1066	HP:0000006	Autosomal dominant inheritance
51780	KDM3B C5orf7 JHDM2B JMJD1B KIAA1082	HP:0000006	Autosomal dominant inheritance
54538	ROBO4 UNQ421/PRO3674	HP:0000006	Autosomal dominant inheritance
54796	BNC2	HP:0000006	Autosomal dominant inheritance
54822	TRPM7 CHAK1 LTRPC7	HP:0000006	Autosomal dominant inheritance
54829	ASPN PLAP1 SLRR1C UNQ215/PRO241	HP:0000006	Autosomal dominant inheritance
55012	PPP2R3C C14orf10 G5PR	HP:0000006	Autosomal dominant inheritance
55270	NUDT15 MTH2	HP:0000006	Autosomal dominant inheritance
55553	SOX6	HP:0000006	Autosomal dominant inheritance
55596	ZCCHC8	HP:0000006	Autosomal dominant inheritance
55654	TMEM127	HP:0000006	Autosomal dominant inheritance
55689	YEATS2 KIAA1197	HP:0000006	Autosomal dominant inheritance
55737	VPS35 MEM3 TCCCTA00141	HP:0000006	Autosomal dominant inheritance
55765	INAVA C1orf106	HP:0000006	Autosomal dominant inheritance
55811	ADCY10 SAC	HP:0000006	Autosomal dominant inheritance
55904	KMT2E MLL5	HP:0000006	Autosomal dominant inheritance
56244	BTNL2	HP:0000006	Autosomal dominant inheritance
56729	RETN FIZZ3 HXCP1 RSTN UNQ407/PRO1199	HP:0000006	Autosomal dominant inheritance
56910	STARD7 GTT1	HP:0000006	Autosomal dominant inheritance
57178	ZMIZ1 KIAA1224 RAI17 ZIMP10	HP:0000006	Autosomal dominant inheritance
57468	SLC12A5 KCC2 KIAA1176	HP:0000006	Autosomal dominant inheritance
57522	SRGAP1 ARHGAP13 KIAA1304	HP:0000006	Autosomal dominant inheritance
57647	DHX37 DDX37 KIAA1517	HP:0000006	Autosomal dominant inheritance
57674	RNF213 ALO17 C17orf27 KIAA1554 KIAA1618 MYSTR	HP:0000006	Autosomal dominant inheritance
57680	CHD8 HELSNF1 KIAA1564	HP:0000006	Autosomal dominant inheritance
58499	ZNF462 KIAA1803	HP:0000006	Autosomal dominant inheritance
60468	BACH2	HP:0000006	Autosomal dominant inheritance
64065	PERP KCP1 KRTCAP1 PIGPC1 THW	HP:0000006	Autosomal dominant inheritance
64072	CDH23 KIAA1774 KIAA1812 UNQ1894/PRO4340	HP:0000006	Autosomal dominant inheritance
64376	IKZF5 ZNFN1A5	HP:0000006	Autosomal dominant inheritance
64419	MTMR14 C3orf29	HP:0000006	Autosomal dominant inheritance
64834	ELOVL1 SSC1 CGI-88	HP:0000006	Autosomal dominant inheritance
65078	RTN4R NOGOR UNQ330/PRO526	HP:0000006	Autosomal dominant inheritance
79574	EPS8L3 EPS8R3	HP:0000006	Autosomal dominant inheritance
79625	NDNF C4orf31 UNQ2748/PRO6487	HP:0000006	Autosomal dominant inheritance
79728	PALB2 FANCN	HP:0000006	Autosomal dominant inheritance
79853	TM4SF20 UNQ518/PRO994	HP:0000006	Autosomal dominant inheritance
79966	SCD5 ACOD4 SCD2 SCD4	HP:0000006	Autosomal dominant inheritance
80114	BICC1	HP:0000006	Autosomal dominant inheritance
80199	FUZ FY	HP:0000006	Autosomal dominant inheritance
80216	ALPK1 KIAA1527 LAK	HP:0000006	Autosomal dominant inheritance
80217	CFAP43 C10orf79 WDR96	HP:0000006	Autosomal dominant inheritance
80781	COL18A1	HP:0000006	Autosomal dominant inheritance
80832	APOL4	HP:0000006	Autosomal dominant inheritance
83636	C19orf12	HP:0000006	Autosomal dominant inheritance
83872	HMCN1 FIBL6	HP:0000006	Autosomal dominant inheritance
83990	BRIP1 BACH1 FANCJ	HP:0000006	Autosomal dominant inheritance
84148	KAT8 MOF MYST1 PP7073	HP:0000006	Autosomal dominant inheritance
84168	ANTXR1 ATR TEM8	HP:0000006	Autosomal dominant inheritance
84172	POLR1B	HP:0000006	Autosomal dominant inheritance
84823	LMNB2 LMN2	HP:0000006	Autosomal dominant inheritance
85366	MYLK2	HP:0000006	Autosomal dominant inheritance
93649	MYOCD MYCD	HP:0000006	Autosomal dominant inheritance
112609	MRAP2 C6orf117	HP:0000006	Autosomal dominant inheritance
114327	EFHC1	HP:0000006	Autosomal dominant inheritance
116931	MED12L KIAA1635 TNRC11L TRALP TRALPUSH PRO0314	HP:0000006	Autosomal dominant inheritance
117156	SCGB3A2 PNSP1 UGRP1 UNQ566/PRO1128	HP:0000006	Autosomal dominant inheritance
120892	LRRK2 PARK8	HP:0000006	Autosomal dominant inheritance
130340	AP1S3	HP:0000006	Autosomal dominant inheritance
131405	TRIM71 LIN41	HP:0000006	Autosomal dominant inheritance
144245	ALG10B KCR1	HP:0000006	Autosomal dominant inheritance
144568	A2ML1 CPAMD9	HP:0000006	Autosomal dominant inheritance
148022	TICAM1 PRVTIRB TRIF	HP:0000006	Autosomal dominant inheritance
151516	ASPRV1 SASP	HP:0000006	Autosomal dominant inheritance
161582	DNAAF4 DYX1C1 EKN1	HP:0000006	Autosomal dominant inheritance
166929	SGMS2 SMS2	HP:0000006	Autosomal dominant inheritance
169026	SLC30A8 ZNT8	HP:0000006	Autosomal dominant inheritance
200424	TET3 KIAA0401	HP:0000006	Autosomal dominant inheritance
267012	DAOA G72	HP:0000006	Autosomal dominant inheritance
285282	RABL3	HP:0000006	Autosomal dominant inheritance
338567	KCNK18 TRESK TRIK	HP:0000006	Autosomal dominant inheritance
387119	CEP85L C6orf204	HP:0000006	Autosomal dominant inheritance
727897	MUC5B MUC5	HP:0000006	Autosomal dominant inheritance
100134444	KCNJ18	HP:0000006	Autosomal dominant inheritance
20	ABCA2 ABC2 KIAA1062	HP:0000007	Autosomal recessive inheritance
104	ADARB1 ADAR2 DRADA2 RED1	HP:0000007	Autosomal recessive inheritance
109	ADCY3 KIAA0511	HP:0000007	Autosomal recessive inheritance
154	ADRB2 ADRB2R B2AR	HP:0000007	Autosomal recessive inheritance
155	ADRB3 ADRB3R B3AR	HP:0000007	Autosomal recessive inheritance
162	AP1B1 ADTB1 BAM22 CLAPB2	HP:0000007	Autosomal recessive inheritance
181	AGRP AGRT ART	HP:0000007	Autosomal recessive inheritance
286	ANK1 ANK	HP:0000007	Autosomal recessive inheritance
336	APOA2	HP:0000007	Autosomal recessive inheritance
399	RHOH ARHH TTF	HP:0000007	Autosomal recessive inheritance
491	ATP2B2 PMCA2	HP:0000007	Autosomal recessive inheritance
587	BCAT2 BCATM BCT2 ECA40	HP:0000007	Autosomal recessive inheritance
590	BCHE CHE1	HP:0000007	Autosomal recessive inheritance
629	CFB BF BFD	HP:0000007	Autosomal recessive inheritance
650	BMP2 BMP2A	HP:0000007	Autosomal recessive inheritance
738	VPS51 ANG2 C11orf2 C11orf3 FFR PP5382	HP:0000007	Autosomal recessive inheritance
774	CACNA1B CACH5 CACNL1A5	HP:0000007	Autosomal recessive inheritance
833	CARS1 CARS	HP:0000007	Autosomal recessive inheritance
1109	AKR1C4 CHDR	HP:0000007	Autosomal recessive inheritance
1136	CHRNA3 NACHRA3	HP:0000007	Autosomal recessive inheritance
1267	CNP	HP:0000007	Autosomal recessive inheritance
1303	COL12A1 COL12A1L	HP:0000007	Autosomal recessive inheritance
1327	COX4I1 COX4	HP:0000007	Autosomal recessive inheritance
1339	COX6A2 COX6A COX6AH	HP:0000007	Autosomal recessive inheritance
1371	CPOX CPO CPX	HP:0000007	Autosomal recessive inheritance
1436	CSF1R FMS	HP:0000007	Autosomal recessive inheritance
1468	SLC25A10 DIC	HP:0000007	Autosomal recessive inheritance
1474	CST6	HP:0000007	Autosomal recessive inheritance
1638	DCT TYRP2	HP:0000007	Autosomal recessive inheritance
1639	DCTN1	HP:0000007	Autosomal recessive inheritance
1725	DHPS DS	HP:0000007	Autosomal recessive inheritance
1769	DNAH8	HP:0000007	Autosomal recessive inheritance
1781	DYNC1I2 DNCI2 DNCIC2	HP:0000007	Autosomal recessive inheritance
1861	TOR1A DQ2 DYT1 TA TORA	HP:0000007	Autosomal recessive inheritance
2048	EPHB2 DRT EPHT3 EPTH3 ERK HEK5 TYRO5	HP:0000007	Autosomal recessive inheritance
2053	EPHX2	HP:0000007	Autosomal recessive inheritance
2193	FARSA FARS FARSL FARSLA	HP:0000007	Autosomal recessive inheritance
2212	FCGR2A CD32 FCG2 FCGR2A1 IGFR2	HP:0000007	Autosomal recessive inheritance
2222	FDFT1	HP:0000007	Autosomal recessive inheritance
2312	FLG	HP:0000007	Autosomal recessive inheritance
2590	GALNT2	HP:0000007	Autosomal recessive inheritance
2615	LRRC32 D11S833E	HP:0000007	Autosomal recessive inheritance
2692	GHRHR	HP:0000007	Autosomal recessive inheritance
2806	GOT2 KYAT4	HP:0000007	Autosomal recessive inheritance
2917	GRM7 GPRC1G MGLUR7	HP:0000007	Autosomal recessive inheritance
2936	GSR GLUR GRD1	HP:0000007	Autosomal recessive inheritance
3071	NCKAP1L HEM1	HP:0000007	Autosomal recessive inheritance
3078	CFHR1 CFHL CFHL1 CFHL1P CFHR1P FHR1 HFL1 HFL2	HP:0000007	Autosomal recessive inheritance
3119	HLA-DQB1 HLA-DQB	HP:0000007	Autosomal recessive inheritance
3419	IDH3A	HP:0000007	Autosomal recessive inheritance
3458	IFNG	HP:0000007	Autosomal recessive inheritance
3560	IL2RB IL15RB	HP:0000007	Autosomal recessive inheritance
3570	IL6R	HP:0000007	Autosomal recessive inheritance
3572	IL6ST	HP:0000007	Autosomal recessive inheritance
3574	IL7	HP:0000007	Autosomal recessive inheritance
3658	IREB2	HP:0000007	Autosomal recessive inheritance
3717	JAK2	HP:0000007	Autosomal recessive inheritance
3949	LDLR	HP:0000007	Autosomal recessive inheritance
3953	LEPR DB OBR	HP:0000007	Autosomal recessive inheritance
4010	LMX1B	HP:0000007	Autosomal recessive inheritance
4023	LPL LIPD	HP:0000007	Autosomal recessive inheritance
4081	MAB21L1 CAGR1 Nbla00126	HP:0000007	Autosomal recessive inheritance
4157	MC1R MSHR	HP:0000007	Autosomal recessive inheritance
4160	MC4R	HP:0000007	Autosomal recessive inheritance
4179	CD46 MCP MIC10	HP:0000007	Autosomal recessive inheritance
4190	MDH1 MDHA	HP:0000007	Autosomal recessive inheritance
4193	MDM2	HP:0000007	Autosomal recessive inheritance
4312	MMP1 CLG	HP:0000007	Autosomal recessive inheritance
4607	MYBPC3	HP:0000007	Autosomal recessive inheritance
4615	MYD88	HP:0000007	Autosomal recessive inheritance
4621	MYH3	HP:0000007	Autosomal recessive inheritance
4632	MYL1	HP:0000007	Autosomal recessive inheritance
4654	MYOD1 BHLHC1 MYF3 MYOD	HP:0000007	Autosomal recessive inheritance
4677	NARS1 NARS NRS	HP:0000007	Autosomal recessive inheritance
4697	NDUFA4	HP:0000007	Autosomal recessive inheritance
4716	NDUFB10	HP:0000007	Autosomal recessive inheritance
4718	NDUFC2 HLC1	HP:0000007	Autosomal recessive inheritance
4744	NEFH KIAA0845 NFH	HP:0000007	Autosomal recessive inheritance
4796	TONSL IKBR NFKBIL2	HP:0000007	Autosomal recessive inheritance
4927	NUP88	HP:0000007	Autosomal recessive inheritance
5078	PAX4	HP:0000007	Autosomal recessive inheritance
5138	PDE2A	HP:0000007	Autosomal recessive inheritance
5188	GATB PET112 PET112L HSPC199	HP:0000007	Autosomal recessive inheritance
5317	PKP1	HP:0000007	Autosomal recessive inheritance
5321	PLA2G4A CPLA2 PLA2G4	HP:0000007	Autosomal recessive inheritance
5331	PLCB3	HP:0000007	Autosomal recessive inheritance
5630	PRPH NEF4 PRPH1	HP:0000007	Autosomal recessive inheritance
5699	PSMB10 LMP10 MECL1	HP:0000007	Autosomal recessive inheritance
5732	PTGER2	HP:0000007	Autosomal recessive inheritance
5741	PTH	HP:0000007	Autosomal recessive inheritance
5833	PCYT2	HP:0000007	Autosomal recessive inheritance
5880	RAC2	HP:0000007	Autosomal recessive inheritance
5995	RGR	HP:0000007	Autosomal recessive inheritance
6182	MRPL12 MRPL7 RPML12	HP:0000007	Autosomal recessive inheritance
6472	SHMT2	HP:0000007	Autosomal recessive inheritance
6558	SLC12A2 NKCC1	HP:0000007	Autosomal recessive inheritance
6608	SMO SMOH	HP:0000007	Autosomal recessive inheritance
6652	SORD	HP:0000007	Autosomal recessive inheritance
6777	STAT5B	HP:0000007	Autosomal recessive inheritance
6840	SVIL	HP:0000007	Autosomal recessive inheritance
6897	TARS1 TARS	HP:0000007	Autosomal recessive inheritance
7015	TERT EST2 TCS1 TRT	HP:0000007	Autosomal recessive inheritance
7098	TLR3	HP:0000007	Autosomal recessive inheritance
7172	TPMT	HP:0000007	Autosomal recessive inheritance
7201	TRHR	HP:0000007	Autosomal recessive inheritance
7352	UCP3 SLC25A9	HP:0000007	Autosomal recessive inheritance
7358	UGDH	HP:0000007	Autosomal recessive inheritance
7360	UGP2 UGP1	HP:0000007	Autosomal recessive inheritance
7386	UQCRFS1	HP:0000007	Autosomal recessive inheritance
7701	ZNF142 KIAA0236	HP:0000007	Autosomal recessive inheritance
8021	NUP214 CAIN CAN KIAA0023	HP:0000007	Autosomal recessive inheritance
8074	FGF23 HYPF UNQ3027/PRO9828	HP:0000007	Autosomal recessive inheritance
8087	FXR1	HP:0000007	Autosomal recessive inheritance
8216	LZTR1 TCFL2	HP:0000007	Autosomal recessive inheritance
8560	DEGS1 DES1 MLD MIG15	HP:0000007	Autosomal recessive inheritance
8567	MADD DENN IG20 KIAA0358	HP:0000007	Autosomal recessive inheritance
8632	DNAH17 DNAHL1 DNEL2	HP:0000007	Autosomal recessive inheritance
8720	MBTPS1 KIAA0091 S1P SKI1	HP:0000007	Autosomal recessive inheritance
8884	SLC5A6 SMVT	HP:0000007	Autosomal recessive inheritance
9080	CLDN9	HP:0000007	Autosomal recessive inheritance
9091	PIGQ GPI1	HP:0000007	Autosomal recessive inheritance
9147	NEMF SDCCAG1	HP:0000007	Autosomal recessive inheritance
9254	CACNA2D2 KIAA0558	HP:0000007	Autosomal recessive inheritance
9365	KL	HP:0000007	Autosomal recessive inheritance
9377	COX5A	HP:0000007	Autosomal recessive inheritance
9488	PIGB	HP:0000007	Autosomal recessive inheritance
9496	TBX4	HP:0000007	Autosomal recessive inheritance
9607	CARTPT CART	HP:0000007	Autosomal recessive inheritance
9653	HS2ST1 HS2ST KIAA0448	HP:0000007	Autosomal recessive inheritance
9672	SDC3 KIAA0468	HP:0000007	Autosomal recessive inheritance
9699	RIMS2 KIAA0751 RAB3IP3 RIM2	HP:0000007	Autosomal recessive inheritance
9722	NOS1AP CAPON KIAA0464	HP:0000007	Autosomal recessive inheritance
9922	IQSEC1 ARFGEP100 BRAG2 KIAA0763	HP:0000007	Autosomal recessive inheritance
9948	WDR1	HP:0000007	Autosomal recessive inheritance
10026	PIGK GPI8	HP:0000007	Autosomal recessive inheritance
10068	IL18BP	HP:0000007	Autosomal recessive inheritance
10125	RASGRP1 RASGRP	HP:0000007	Autosomal recessive inheritance
10203	CALCRL CGRPR	HP:0000007	Autosomal recessive inheritance
10379	IRF9 ISGF3G	HP:0000007	Autosomal recessive inheritance
10388	SYCP2 SCP2	HP:0000007	Autosomal recessive inheritance
10651	MTX2	HP:0000007	Autosomal recessive inheritance
10677	AVIL	HP:0000007	Autosomal recessive inheritance
10750	GRAP	HP:0000007	Autosomal recessive inheritance
10842	PPP1R17 C7orf16 GSBS	HP:0000007	Autosomal recessive inheritance
10844	TUBGCP2 GCP2	HP:0000007	Autosomal recessive inheritance
10878	CFHR3 CFHL3 FHR3	HP:0000007	Autosomal recessive inheritance
11014	KDELR2 ERD2.2	HP:0000007	Autosomal recessive inheritance
11232	POLG2 MTPOLB	HP:0000007	Autosomal recessive inheritance
11261	CHP1 CHP	HP:0000007	Autosomal recessive inheritance
22872	SEC31A KIAA0905 SEC31L1 HSPC275 HSPC334	HP:0000007	Autosomal recessive inheritance
22873	DZIP1 DZIP DZIP2 KIAA0996	HP:0000007	Autosomal recessive inheritance
23155	CLCC1 KIAA0761 MCLC	HP:0000007	Autosomal recessive inheritance
23184	MESD KIAA0081 MESDC2 MESDM UNQ1911/PRO4369	HP:0000007	Autosomal recessive inheritance
23233	EXOC6B KIAA0919 SEC15B SEC15L2	HP:0000007	Autosomal recessive inheritance
23262	PPIP5K2 HISPPD1 KIAA0433 VIP2	HP:0000007	Autosomal recessive inheritance
23265	EXOC7 EXO70 KIAA1067	HP:0000007	Autosomal recessive inheritance
23268	DNMBP ARHGEF36 KIAA1010 TUBA	HP:0000007	Autosomal recessive inheritance
23446	SLC44A1 CD92 CDW92 CTL1	HP:0000007	Autosomal recessive inheritance
23511	NUP188 KIAA0169	HP:0000007	Autosomal recessive inheritance
23761	PISD	HP:0000007	Autosomal recessive inheritance
25871	NEPRO C3orf17	HP:0000007	Autosomal recessive inheritance
25930	PTPN23 KIAA1471	HP:0000007	Autosomal recessive inheritance
25973	PARS2	HP:0000007	Autosomal recessive inheritance
26007	TKFC DAK	HP:0000007	Autosomal recessive inheritance
26100	WIPI2 CGI-50	HP:0000007	Autosomal recessive inheritance
26173	INTS1 KIAA1440 UNQ1821/PRO3434	HP:0000007	Autosomal recessive inheritance
26224	FBXL3 FBL3A FBXL3A	HP:0000007	Autosomal recessive inheritance
28957	MRPS28 MRPS35 HSPC007	HP:0000007	Autosomal recessive inheritance
28958	COA3 CCDC56 MITRAC12 HSPC009	HP:0000007	Autosomal recessive inheritance
29081	METTL5 DC3 HSPC133	HP:0000007	Autosomal recessive inheritance
29895	MYLPF	HP:0000007	Autosomal recessive inheritance
29928	TIMM22 TEX4 TIM22	HP:0000007	Autosomal recessive inheritance
29960	MRM2 FJH1 FTSJ2	HP:0000007	Autosomal recessive inheritance
51075	TMX2 TXNDC14 CGI-31 My009 PIG26 PSEC0045 UNQ237/PRO270	HP:0000007	Autosomal recessive inheritance
51319	RSRC1 SRRP53 BM-011	HP:0000007	Autosomal recessive inheritance
51399	TRAPPC4 SBDN CGI-104 HSPC172 PTD009	HP:0000007	Autosomal recessive inheritance
51412	ACTL6B ACTL6 BAF53B	HP:0000007	Autosomal recessive inheritance
51649	MRPS23 CGI-138 HSPC329	HP:0000007	Autosomal recessive inheritance
51738	GHRL MTLRP UNQ524/PRO1066	HP:0000007	Autosomal recessive inheritance
54209	TREM2	HP:0000007	Autosomal recessive inheritance
54681	P4HTM PH4	HP:0000007	Autosomal recessive inheritance
54766	BTG4 PC3B	HP:0000007	Autosomal recessive inheritance
54790	TET2 KIAA1546 Nbla00191	HP:0000007	Autosomal recessive inheritance
54834	GDAP2	HP:0000007	Autosomal recessive inheritance
54892	NCAPG2 LUZP5	HP:0000007	Autosomal recessive inheritance
54970	TTC12	HP:0000007	Autosomal recessive inheritance
54974	THG1L ICF45	HP:0000007	Autosomal recessive inheritance
55012	PPP2R3C C14orf10 G5PR	HP:0000007	Autosomal recessive inheritance
55037	PTCD3 MRPS39 TRG15	HP:0000007	Autosomal recessive inheritance
55074	OXR1 Nbla00307	HP:0000007	Autosomal recessive inheritance
55152	DALRD3	HP:0000007	Autosomal recessive inheritance
55191	NADSYN1	HP:0000007	Autosomal recessive inheritance
55278	QRSL1	HP:0000007	Autosomal recessive inheritance
55329	MNS1	HP:0000007	Autosomal recessive inheritance
55617	TASP1 C20orf13	HP:0000007	Autosomal recessive inheritance
55627	SMPD4 KIAA1418 SKNY	HP:0000007	Autosomal recessive inheritance
55656	INTS8 C8orf52	HP:0000007	Autosomal recessive inheritance
55681	SCYL2 CVAK104 KIAA1360	HP:0000007	Autosomal recessive inheritance
55733	HHAT MART2 SKI1	HP:0000007	Autosomal recessive inheritance
55790	CSGALNACT1 CHGN GALNACT1 UNQ656/PRO1287	HP:0000007	Autosomal recessive inheritance
56984	PSMG2 HCCA3 PAC2 TNFSF5IP1	HP:0000007	Autosomal recessive inheritance
57020	VPS35L C16orf62 101F10.2	HP:0000007	Autosomal recessive inheritance
57589	RIC1 CIP150 KIAA1432	HP:0000007	Autosomal recessive inheritance
57591	MRTFA KIAA1438 MAL MKL1	HP:0000007	Autosomal recessive inheritance
57647	DHX37 DDX37 KIAA1517	HP:0000007	Autosomal recessive inheritance
57670	KIAA1549	HP:0000007	Autosomal recessive inheritance
57674	RNF213 ALO17 C17orf27 KIAA1554 KIAA1618 MYSTR	HP:0000007	Autosomal recessive inheritance
58494	JAM2 C21orf43 VEJAM UNQ219/PRO245	HP:0000007	Autosomal recessive inheritance
60561	RINT1	HP:0000007	Autosomal recessive inheritance
63915	BLOC1S5 MUTED	HP:0000007	Autosomal recessive inheritance
64065	PERP KCP1 KRTCAP1 PIGPC1 THW	HP:0000007	Autosomal recessive inheritance
64208	POPDC3 POP3	HP:0000007	Autosomal recessive inheritance
64359	NXN NRX	HP:0000007	Autosomal recessive inheritance
64432	MRPS25 RPMS25	HP:0000007	Autosomal recessive inheritance
64682	ANAPC1 TSG24	HP:0000007	Autosomal recessive inheritance
64849	SLC13A3 NADC3 SDCT2	HP:0000007	Autosomal recessive inheritance
65260	COA7 C1orf163 RESA1 SELRC1	HP:0000007	Autosomal recessive inheritance
79140	CCDC28B	HP:0000007	Autosomal recessive inheritance
79415	CYBC1 C17orf62 EROS	HP:0000007	Autosomal recessive inheritance
79703	TOP6BL C11orf80	HP:0000007	Autosomal recessive inheritance
79925	SPEF2 KIAA1770 KPL2	HP:0000007	Autosomal recessive inheritance
80152	CENPT C16orf56 ICEN22	HP:0000007	Autosomal recessive inheritance
81622	UNC93B1 UNC93 UNC93B	HP:0000007	Autosomal recessive inheritance
83894	TTC29	HP:0000007	Autosomal recessive inheritance
84071	ARMC2	HP:0000007	Autosomal recessive inheritance
84138	SLC7A6OS	HP:0000007	Autosomal recessive inheritance
84274	COQ5	HP:0000007	Autosomal recessive inheritance
84340	GFM2 EFG2 MSTP027	HP:0000007	Autosomal recessive inheritance
84628	NTNG2 KIAA1857 LMNT2 UNQ9381/PRO34206	HP:0000007	Autosomal recessive inheritance
84833	ATP5MK ATP5MD DAPIT HCVFTP2 USMG5 PD04912	HP:0000007	Autosomal recessive inheritance
84842	HPDL GLOXD1	HP:0000007	Autosomal recessive inheritance
84868	HAVCR2 TIM3 TIMD3	HP:0000007	Autosomal recessive inheritance
84957	RELT TNFRSF19L	HP:0000007	Autosomal recessive inheritance
85015	USP45	HP:0000007	Autosomal recessive inheritance
89874	SLC25A21 ODC	HP:0000007	Autosomal recessive inheritance
90416	CCDC32 C15orf57	HP:0000007	Autosomal recessive inheritance
90522	YIF1B PP4519 UNQ3073/PRO9905	HP:0000007	Autosomal recessive inheritance
91452	ACBD5 KIAA1996	HP:0000007	Autosomal recessive inheritance
91461	PKDCC SGK493 VLK	HP:0000007	Autosomal recessive inheritance
91801	ALKBH8 ABH8	HP:0000007	Autosomal recessive inheritance
94137	RP1L1	HP:0000007	Autosomal recessive inheritance
118491	CFAP70 TTC18	HP:0000007	Autosomal recessive inheritance
124842	TMEM132E	HP:0000007	Autosomal recessive inheritance
124976	SPNS2	HP:0000007	Autosomal recessive inheritance
125170	MIEF2 MID49 SMCR7	HP:0000007	Autosomal recessive inheritance
128486	FITM2 C20orf142 FIT2	HP:0000007	Autosomal recessive inheritance
128869	PIGU CDC91L1 PSEC0205 UNQ3055/PRO9875	HP:0000007	Autosomal recessive inheritance
130589	GALM BLOCK25	HP:0000007	Autosomal recessive inheritance
130951	M1AP C2orf65 SPATA37	HP:0000007	Autosomal recessive inheritance
144811	LACC1 C13orf31 FAMIN	HP:0000007	Autosomal recessive inheritance
146754	DNAH2 DNAHC2 DNHD3 KIAA1503	HP:0000007	Autosomal recessive inheritance
147138	TMC8 EVER2 EVIN2	HP:0000007	Autosomal recessive inheritance
148022	TICAM1 PRVTIRB TRIF	HP:0000007	Autosomal recessive inheritance
149371	EXOC8	HP:0000007	Autosomal recessive inheritance
150365	MEI1	HP:0000007	Autosomal recessive inheritance
152110	NEK10	HP:0000007	Autosomal recessive inheritance
159686	CFAP58 C10orf80 CCDC147	HP:0000007	Autosomal recessive inheritance
170825	GSX2 GSH2	HP:0000007	Autosomal recessive inheritance
199223	TTC21A STI2	HP:0000007	Autosomal recessive inheritance
200424	TET3 KIAA0401	HP:0000007	Autosomal recessive inheritance
200942	KLHDC8B FP17659	HP:0000007	Autosomal recessive inheritance
201134	CEP112 CCDC46	HP:0000007	Autosomal recessive inheritance
219285	SAMD9L C7orf6 DRIF2 KIAA2005 UEF	HP:0000007	Autosomal recessive inheritance
246176	GAS2L2 GAR17	HP:0000007	Autosomal recessive inheritance
253959	RALGAPA1 GARNL1 KIAA0884 TULIP1	HP:0000007	Autosomal recessive inheritance
255101	CFAP65 CCDC108	HP:0000007	Autosomal recessive inheritance
283459	GATC 15E1.2	HP:0000007	Autosomal recessive inheritance
283677	REC114 C15orf60	HP:0000007	Autosomal recessive inheritance
284184	NDUFAF8 C17orf89	HP:0000007	Autosomal recessive inheritance
284439	SLC25A42	HP:0000007	Autosomal recessive inheritance
285600	KIAA0825 C5orf36	HP:0000007	Autosomal recessive inheritance
317662	FAM149B1 KIAA0974	HP:0000007	Autosomal recessive inheritance
317761	SIX6OS1 C14orf39	HP:0000007	Autosomal recessive inheritance
341208	HEPHL1	HP:0000007	Autosomal recessive inheritance
345643	MCIDAS IDAS MCI MCIN	HP:0000007	Autosomal recessive inheritance
374969	SVBP CCDC23	HP:0000007	Autosomal recessive inheritance
375387	NRROS LRRC33 UNQ3030/PRO9833	HP:0000007	Autosomal recessive inheritance
388551	CEACAM16 CEAL2	HP:0000007	Autosomal recessive inheritance
645104	CLRN2	HP:0000007	Autosomal recessive inheritance
100303755	PET117 UNQ607/PRO1194	HP:0000007	Autosomal recessive inheritance
128	ADH5 ADHX FDH	HP:0000008	Abnormal morphology of female internal genitalia
581	BAX BCL2L4	HP:0000008	Abnormal morphology of female internal genitalia
595	CCND1 BCL1 PRAD1	HP:0000008	Abnormal morphology of female internal genitalia
641	BLM RECQ2 RECQL3	HP:0000008	Abnormal morphology of female internal genitalia
646	BNC1 BNC	HP:0000008	Abnormal morphology of female internal genitalia
673	BRAF BRAF1 RAFB1	HP:0000008	Abnormal morphology of female internal genitalia
1277	COL1A1	HP:0000008	Abnormal morphology of female internal genitalia
1287	COL4A5	HP:0000008	Abnormal morphology of female internal genitalia
1288	COL4A6	HP:0000008	Abnormal morphology of female internal genitalia
1290	COL5A2	HP:0000008	Abnormal morphology of female internal genitalia
1760	DMPK DM1PK MDPK	HP:0000008	Abnormal morphology of female internal genitalia
2255	FGF10	HP:0000008	Abnormal morphology of female internal genitalia
2321	FLT1 FLT FRT VEGFR1	HP:0000008	Abnormal morphology of female internal genitalia
2542	SLC37A4 G6PT G6PT1 PRO0685 TRG19	HP:0000008	Abnormal morphology of female internal genitalia
2584	GALK1 GALK	HP:0000008	Abnormal morphology of female internal genitalia
4163	MCC	HP:0000008	Abnormal morphology of female internal genitalia
4193	MDM2	HP:0000008	Abnormal morphology of female internal genitalia
4313	MMP2 CLG4A	HP:0000008	Abnormal morphology of female internal genitalia
4323	MMP14	HP:0000008	Abnormal morphology of female internal genitalia
4519	MT-CYB COB CYTB MTCYB	HP:0000008	Abnormal morphology of female internal genitalia
4534	MTM1 CG2	HP:0000008	Abnormal morphology of female internal genitalia
4659	PPP1R12A MBS MYPT1	HP:0000008	Abnormal morphology of female internal genitalia
4665	NAB2 MADER	HP:0000008	Abnormal morphology of female internal genitalia
5157	PDGFRL PRLTS	HP:0000008	Abnormal morphology of female internal genitalia
5256	PHKA2 PHKLA PYK	HP:0000008	Abnormal morphology of female internal genitalia
5261	PHKG2	HP:0000008	Abnormal morphology of female internal genitalia
5320	PLA2G2A PLA2B PLA2L RASF-A	HP:0000008	Abnormal morphology of female internal genitalia
5518	PPP2R1A	HP:0000008	Abnormal morphology of female internal genitalia
5782	PTPN12	HP:0000008	Abnormal morphology of female internal genitalia
5795	PTPRJ DEP1	HP:0000008	Abnormal morphology of female internal genitalia
6778	STAT6	HP:0000008	Abnormal morphology of female internal genitalia
6790	AURKA AIK AIRK1 ARK1 AURA AYK1 BTAK IAK1 STK15 STK6	HP:0000008	Abnormal morphology of female internal genitalia
7026	NR2F2 ARP1 TFCOUP2	HP:0000008	Abnormal morphology of female internal genitalia
7097	TLR2 TIL4	HP:0000008	Abnormal morphology of female internal genitalia
9839	ZEB2 KIAA0569 SIP1 ZFHX1B ZFX1B HRIHFB2411	HP:0000008	Abnormal morphology of female internal genitalia
10046	MAMLD1 CG1 CXorf6	HP:0000008	Abnormal morphology of female internal genitalia
10269	ZMPSTE24 FACE1 STE24	HP:0000008	Abnormal morphology of female internal genitalia
10699	CORIN CRN TMPRSS10	HP:0000008	Abnormal morphology of female internal genitalia
23438	HARS2 HARSL HARSR HO3	HP:0000008	Abnormal morphology of female internal genitalia
25788	RAD54B	HP:0000008	Abnormal morphology of female internal genitalia
57647	DHX37 DDX37 KIAA1517	HP:0000008	Abnormal morphology of female internal genitalia
64682	ANAPC1 TSG24	HP:0000008	Abnormal morphology of female internal genitalia
79140	CCDC28B	HP:0000008	Abnormal morphology of female internal genitalia
79625	NDNF C4orf31 UNQ2748/PRO6487	HP:0000008	Abnormal morphology of female internal genitalia
80185	TTI2 C8orf41	HP:0000008	Abnormal morphology of female internal genitalia
84823	LMNB2 LMN2	HP:0000008	Abnormal morphology of female internal genitalia
114034	TOE1	HP:0000008	Abnormal morphology of female internal genitalia
171568	POLR3H KIAA1665 RPC8	HP:0000008	Abnormal morphology of female internal genitalia
205717	USF3 KIAA2018	HP:0000008	Abnormal morphology of female internal genitalia
219736	STOX1 C10orf24	HP:0000008	Abnormal morphology of female internal genitalia
317761	SIX6OS1 C14orf39	HP:0000008	Abnormal morphology of female internal genitalia
388662	SLC6A17 NTT4	HP:0000008	Abnormal morphology of female internal genitalia
126	ADH1C ADH3	HP:0000009	Functional abnormality of the bladder
186	AGTR2	HP:0000009	Functional abnormality of the bladder
207	AKT1 PKB RAC	HP:0000009	Functional abnormality of the bladder
1135	CHRNA2	HP:0000009	Functional abnormality of the bladder
1136	CHRNA3 NACHRA3	HP:0000009	Functional abnormality of the bladder
1137	CHRNA4 NACRA4	HP:0000009	Functional abnormality of the bladder
1141	CHRNB2	HP:0000009	Functional abnormality of the bladder
1161	ERCC8 CKN1 CSA	HP:0000009	Functional abnormality of the bladder
1183	CLCN4	HP:0000009	Functional abnormality of the bladder
1387	CREBBP CBP	HP:0000009	Functional abnormality of the bladder
1392	CRH	HP:0000009	Functional abnormality of the bladder
1656	DDX6 HLR2 RCK	HP:0000009	Functional abnormality of the bladder
1756	DMD	HP:0000009	Functional abnormality of the bladder
1801	DPH1 DPH2L DPH2L1 OVCA1	HP:0000009	Functional abnormality of the bladder
1857	DVL3 KIAA0208	HP:0000009	Functional abnormality of the bladder
2033	EP300 P300	HP:0000009	Functional abnormality of the bladder
2182	ACSL4 ACS4 FACL4 LACS4	HP:0000009	Functional abnormality of the bladder
2255	FGF10	HP:0000009	Functional abnormality of the bladder
2261	FGFR3 JTK4	HP:0000009	Functional abnormality of the bladder
2521	FUS TLS	HP:0000009	Functional abnormality of the bladder
2581	GALC	HP:0000009	Functional abnormality of the bladder
2590	GALNT2	HP:0000009	Functional abnormality of the bladder
2664	GDI1 GDIL OPHN2 RABGDIA XAP4	HP:0000009	Functional abnormality of the bladder
2747	GLUD2 GLUDP1	HP:0000009	Functional abnormality of the bladder
3054	HCFC1 HCF1 HFC1	HP:0000009	Functional abnormality of the bladder
3119	HLA-DQB1 HLA-DQB	HP:0000009	Functional abnormality of the bladder
3190	HNRNPK HNRPK	HP:0000009	Functional abnormality of the bladder
3251	HPRT1 HPRT	HP:0000009	Functional abnormality of the bladder
3909	LAMA3 LAMNA	HP:0000009	Functional abnormality of the bladder
3914	LAMB3 LAMNB1	HP:0000009	Functional abnormality of the bladder
3918	LAMC2 LAMB2T LAMNB2	HP:0000009	Functional abnormality of the bladder
4137	MAPT MAPTL MTBT1 TAU	HP:0000009	Functional abnormality of the bladder
4204	MECP2	HP:0000009	Functional abnormality of the bladder
4312	MMP1 CLG	HP:0000009	Functional abnormality of the bladder
4359	MPZ	HP:0000009	Functional abnormality of the bladder
4613	MYCN BHLHE37 NMYC	HP:0000009	Functional abnormality of the bladder
4665	NAB2 MADER	HP:0000009	Functional abnormality of the bladder
4747	NEFL NF68 NFL	HP:0000009	Functional abnormality of the bladder
4771	NF2 SCH	HP:0000009	Functional abnormality of the bladder
5063	PAK3 OPHN3	HP:0000009	Functional abnormality of the bladder
5133	PDCD1 PD1	HP:0000009	Functional abnormality of the bladder
5290	PIK3CA	HP:0000009	Functional abnormality of the bladder
5376	PMP22 GAS3	HP:0000009	Functional abnormality of the bladder
5498	PPOX	HP:0000009	Functional abnormality of the bladder
5610	EIF2AK2 PKR PRKR	HP:0000009	Functional abnormality of the bladder
5921	RASA1 GAP RASA	HP:0000009	Functional abnormality of the bladder
6197	RPS6KA3 ISPK1 MAPKAPK1B RSK2	HP:0000009	Functional abnormality of the bladder
6347	CCL2 MCP1 SCYA2	HP:0000009	Functional abnormality of the bladder
6509	SLC1A4 ASCT1 SATT	HP:0000009	Functional abnormality of the bladder
6598	SMARCB1 BAF47 INI1 SNF5L1	HP:0000009	Functional abnormality of the bladder
6605	SMARCE1 BAF57	HP:0000009	Functional abnormality of the bladder
6608	SMO SMOH	HP:0000009	Functional abnormality of the bladder
6778	STAT6	HP:0000009	Functional abnormality of the bladder
6855	SYP	HP:0000009	Functional abnormality of the bladder
6862	TBXT T	HP:0000009	Functional abnormality of the bladder
6904	TBCD KIAA0988 SSD1 TFCD PP1096	HP:0000009	Functional abnormality of the bladder
7015	TERT EST2 TCS1 TRT	HP:0000009	Functional abnormality of the bladder
7080	NKX2-1 NKX2A TITF1 TTF1	HP:0000009	Functional abnormality of the bladder
7102	TSPAN7 A15 DXS1692E MXS1 TM4SF2	HP:0000009	Functional abnormality of the bladder
7204	TRIO	HP:0000009	Functional abnormality of the bladder
7319	UBE2A RAD6A	HP:0000009	Functional abnormality of the bladder
7552	ZNF711 CMPX1 ZNF6	HP:0000009	Functional abnormality of the bladder
7592	ZNF41	HP:0000009	Functional abnormality of the bladder
8239	USP9X DFFRX FAM USP9	HP:0000009	Functional abnormality of the bladder
8291	DYSF FER1L1	HP:0000009	Functional abnormality of the bladder
8295	TRRAP PAF400	HP:0000009	Functional abnormality of the bladder
8314	BAP1 KIAA0272 hucep-6	HP:0000009	Functional abnormality of the bladder
8405	SPOP	HP:0000009	Functional abnormality of the bladder
9091	PIGQ GPI1	HP:0000009	Functional abnormality of the bladder
9459	ARHGEF6 COOL2 KIAA0006 PIXA	HP:0000009	Functional abnormality of the bladder
9681	DEPDC5 KIAA0645	HP:0000009	Functional abnormality of the bladder
9758	FRMPD4 KIAA0316 PDZD10 PDZK10	HP:0000009	Functional abnormality of the bladder
9839	ZEB2 KIAA0569 SIP1 ZFHX1B ZFX1B HRIHFB2411	HP:0000009	Functional abnormality of the bladder
9968	MED12 ARC240 CAGH45 HOPA KIAA0192 TNRC11 TRAP230	HP:0000009	Functional abnormality of the bladder
10165	SLC25A13 ARALAR2	HP:0000009	Functional abnormality of the bladder
10280	SIGMAR1 OPRS1 SRBP AAG8	HP:0000009	Functional abnormality of the bladder
10466	COG5 GOLTC1 GTC90	HP:0000009	Functional abnormality of the bladder
10524	KAT5 HTATIP TIP60	HP:0000009	Functional abnormality of the bladder
11043	MID2 FXY2 RNF60 TRIM1	HP:0000009	Functional abnormality of the bladder
11141	IL1RAPL1 OPHN4	HP:0000009	Functional abnormality of the bladder
22866	CNKSR2 CNK2 KIAA0902 KSR2	HP:0000009	Functional abnormality of the bladder
23096	IQSEC2 KIAA0522	HP:0000009	Functional abnormality of the bladder
23345	SYNE1 C6orf98 KIAA0796 KIAA1262 KIAA1756 MYNE1	HP:0000009	Functional abnormality of the bladder
23394	ADNP ADNP1 KIAA0784	HP:0000009	Functional abnormality of the bladder
23446	SLC44A1 CD92 CDW92 CTL1	HP:0000009	Functional abnormality of the bladder
24140	FTSJ1 JM23	HP:0000009	Functional abnormality of the bladder
27086	FOXP1 HSPC215	HP:0000009	Functional abnormality of the bladder
27235	COQ2 CL640	HP:0000009	Functional abnormality of the bladder
29081	METTL5 DC3 HSPC133	HP:0000009	Functional abnormality of the bladder
29940	DSE SART2	HP:0000009	Functional abnormality of the bladder
51112	TRAPPC12 TRAMM TTC15 CGI-87	HP:0000009	Functional abnormality of the bladder
51271	UBAP1 NAG20	HP:0000009	Functional abnormality of the bladder
51684	SUFU UNQ650/PRO1280	HP:0000009	Functional abnormality of the bladder
54496	PRMT7 KIAA1933	HP:0000009	Functional abnormality of the bladder
54796	BNC2	HP:0000009	Functional abnormality of the bladder
54892	NCAPG2 LUZP5	HP:0000009	Functional abnormality of the bladder
55157	DARS2	HP:0000009	Functional abnormality of the bladder
55262	TRAPPC14 C7orf43 MAP11	HP:0000009	Functional abnormality of the bladder
55906	ZC4H2 HCA127 KIAA1166	HP:0000009	Functional abnormality of the bladder
57010	CABP4	HP:0000009	Functional abnormality of the bladder
57178	ZMIZ1 KIAA1224 RAI17 ZIMP10	HP:0000009	Functional abnormality of the bladder
57582	KCNT1 KIAA1422	HP:0000009	Functional abnormality of the bladder
58508	KMT2C HALR KIAA1506 MLL3	HP:0000009	Functional abnormality of the bladder
63932	STEEP1 CXorf56	HP:0000009	Functional abnormality of the bladder
64834	ELOVL1 SSC1 CGI-88	HP:0000009	Functional abnormality of the bladder
65109	UPF3B RENT3B UPF3X	HP:0000009	Functional abnormality of the bladder
79628	SH3TC2 KIAA1985 PP12494	HP:0000009	Functional abnormality of the bladder
79868	ALG13 CXorf45 GLT28D1 MDS031	HP:0000009	Functional abnormality of the bladder
80114	BICC1	HP:0000009	Functional abnormality of the bladder
80217	CFAP43 C10orf79 WDR96	HP:0000009	Functional abnormality of the bladder
84231	TRAF7 RFWD1 RNF119	HP:0000009	Functional abnormality of the bladder
84679	SLC9A7 NHE7	HP:0000009	Functional abnormality of the bladder
84842	HPDL GLOXD1	HP:0000009	Functional abnormality of the bladder
90161	HS6ST2 PSEC0092	HP:0000009	Functional abnormality of the bladder
93627	TBCK TBCKL HSPC302	HP:0000009	Functional abnormality of the bladder
113189	CHST14 D4ST1 UNQ1925/PRO4400	HP:0000009	Functional abnormality of the bladder
116442	RAB39B	HP:0000009	Functional abnormality of the bladder
123263	MTFMT FMT FMT1	HP:0000009	Functional abnormality of the bladder
128486	FITM2 C20orf142 FIT2	HP:0000009	Functional abnormality of the bladder
139411	PTCHD1	HP:0000009	Functional abnormality of the bladder
146206	CARMIL2 LRRC16C RLTPR	HP:0000009	Functional abnormality of the bladder
170302	ARX	HP:0000009	Functional abnormality of the bladder
253959	RALGAPA1 GARNL1 KIAA0884 TULIP1	HP:0000009	Functional abnormality of the bladder
339855	KY	HP:0000009	Functional abnormality of the bladder
347344	ZNF81	HP:0000009	Functional abnormality of the bladder
389856	USP27X USP22L USP27	HP:0000009	Functional abnormality of the bladder
641	BLM RECQ2 RECQL3	HP:0000010	Recurrent urinary tract infections
1136	CHRNA3 NACHRA3	HP:0000010	Recurrent urinary tract infections
1387	CREBBP CBP	HP:0000010	Recurrent urinary tract infections
1859	DYRK1A DYRK MNB MNBH	HP:0000010	Recurrent urinary tract infections
2033	EP300 P300	HP:0000010	Recurrent urinary tract infections
3560	IL2RB IL15RB	HP:0000010	Recurrent urinary tract infections
3909	LAMA3 LAMNA	HP:0000010	Recurrent urinary tract infections
3914	LAMB3 LAMNB1	HP:0000010	Recurrent urinary tract infections
3918	LAMC2 LAMB2T LAMNB2	HP:0000010	Recurrent urinary tract infections
4125	MAN2B1 LAMAN MANB	HP:0000010	Recurrent urinary tract infections
5293	PIK3CD	HP:0000010	Recurrent urinary tract infections
5310	PKD1	HP:0000010	Recurrent urinary tract infections
5314	PKHD1 FCYT TIGM1	HP:0000010	Recurrent urinary tract infections
5580	PRKCD PKCD	HP:0000010	Recurrent urinary tract infections
7840	ALMS1 KIAA0328	HP:0000010	Recurrent urinary tract infections
8936	WASF1 KIAA0269 SCAR1 WAVE1	HP:0000010	Recurrent urinary tract infections
10524	KAT5 HTATIP TIP60	HP:0000010	Recurrent urinary tract infections
23193	GANAB G2AN KIAA0088	HP:0000010	Recurrent urinary tract infections
23394	ADNP ADNP1 KIAA0784	HP:0000010	Recurrent urinary tract infections
54796	BNC2	HP:0000010	Recurrent urinary tract infections
55343	SLC35C1 FUCT1	HP:0000010	Recurrent urinary tract infections
80114	BICC1	HP:0000010	Recurrent urinary tract infections
90417	KNSTRN C15orf23 SKAP TRAF4AF1 HSD11	HP:0000010	Recurrent urinary tract infections
199221	DZIP1L	HP:0000010	Recurrent urinary tract infections
284058	KANSL1 CENP-36 KIAA1267 MSL1V1 NSL1	HP:0000010	Recurrent urinary tract infections
1136	CHRNA3 NACHRA3	HP:0000011	Neurogenic bladder
1161	ERCC8 CKN1 CSA	HP:0000011	Neurogenic bladder
5354	PLP1 PLP	HP:0000011	Neurogenic bladder
5498	PPOX	HP:0000011	Neurogenic bladder
5921	RASA1 GAP RASA	HP:0000011	Neurogenic bladder
6904	TBCD KIAA0988 SSD1 TFCD PP1096	HP:0000011	Neurogenic bladder
10466	COG5 GOLTC1 GTC90	HP:0000011	Neurogenic bladder
51112	TRAPPC12 TRAMM TTC15 CGI-87	HP:0000011	Neurogenic bladder
64834	ELOVL1 SSC1 CGI-88	HP:0000011	Neurogenic bladder
93627	TBCK TBCKL HSPC302	HP:0000011	Neurogenic bladder
123263	MTFMT FMT FMT1	HP:0000011	Neurogenic bladder
493856	CISD2 CDGSH2 ERIS ZCD2	HP:0000011	Neurogenic bladder
126	ADH1C ADH3	HP:0000012	Urinary urgency
215	ABCD1 ALD	HP:0000012	Urinary urgency
2629	GBA GC GLUC	HP:0000012	Urinary urgency
2747	GLUD2 GLUDP1	HP:0000012	Urinary urgency
4137	MAPT MAPTL MTBT1 TAU	HP:0000012	Urinary urgency
6311	ATXN2 ATX2 SCA2 TNRC13	HP:0000012	Urinary urgency
6908	TBP GTF2D1 TF2D TFIID	HP:0000012	Urinary urgency
7840	ALMS1 KIAA0328	HP:0000012	Urinary urgency
23400	ATP13A2 PARK9	HP:0000012	Urinary urgency
27235	COQ2 CL640	HP:0000012	Urinary urgency
51271	UBAP1 NAG20	HP:0000012	Urinary urgency
84842	HPDL GLOXD1	HP:0000012	Urinary urgency
128	ADH5 ADHX FDH	HP:0000013	Hypoplasia of the uterus
317761	SIX6OS1 C14orf39	HP:0000013	Hypoplasia of the uterus
126	ADH1C ADH3	HP:0000014	Abnormality of the bladder
186	AGTR2	HP:0000014	Abnormality of the bladder
207	AKT1 PKB RAC	HP:0000014	Abnormality of the bladder
1135	CHRNA2	HP:0000014	Abnormality of the bladder
1136	CHRNA3 NACHRA3	HP:0000014	Abnormality of the bladder
1137	CHRNA4 NACRA4	HP:0000014	Abnormality of the bladder
1141	CHRNB2	HP:0000014	Abnormality of the bladder
1161	ERCC8 CKN1 CSA	HP:0000014	Abnormality of the bladder
1183	CLCN4	HP:0000014	Abnormality of the bladder
1277	COL1A1	HP:0000014	Abnormality of the bladder
1290	COL5A2	HP:0000014	Abnormality of the bladder
1387	CREBBP CBP	HP:0000014	Abnormality of the bladder
1392	CRH	HP:0000014	Abnormality of the bladder
1656	DDX6 HLR2 RCK	HP:0000014	Abnormality of the bladder
1756	DMD	HP:0000014	Abnormality of the bladder
1801	DPH1 DPH2L DPH2L1 OVCA1	HP:0000014	Abnormality of the bladder
1857	DVL3 KIAA0208	HP:0000014	Abnormality of the bladder
2033	EP300 P300	HP:0000014	Abnormality of the bladder
2182	ACSL4 ACS4 FACL4 LACS4	HP:0000014	Abnormality of the bladder
2255	FGF10	HP:0000014	Abnormality of the bladder
2261	FGFR3 JTK4	HP:0000014	Abnormality of the bladder
2294	FOXF1 FKHL5 FREAC1	HP:0000014	Abnormality of the bladder
2581	GALC	HP:0000014	Abnormality of the bladder
2590	GALNT2	HP:0000014	Abnormality of the bladder
2664	GDI1 GDIL OPHN2 RABGDIA XAP4	HP:0000014	Abnormality of the bladder
2747	GLUD2 GLUDP1	HP:0000014	Abnormality of the bladder
3054	HCFC1 HCF1 HFC1	HP:0000014	Abnormality of the bladder
3119	HLA-DQB1 HLA-DQB	HP:0000014	Abnormality of the bladder
3190	HNRNPK HNRPK	HP:0000014	Abnormality of the bladder
3251	HPRT1 HPRT	HP:0000014	Abnormality of the bladder
3909	LAMA3 LAMNA	HP:0000014	Abnormality of the bladder
3914	LAMB3 LAMNB1	HP:0000014	Abnormality of the bladder
3918	LAMC2 LAMB2T LAMNB2	HP:0000014	Abnormality of the bladder
4137	MAPT MAPTL MTBT1 TAU	HP:0000014	Abnormality of the bladder
4204	MECP2	HP:0000014	Abnormality of the bladder
4312	MMP1 CLG	HP:0000014	Abnormality of the bladder
4359	MPZ	HP:0000014	Abnormality of the bladder
4613	MYCN BHLHE37 NMYC	HP:0000014	Abnormality of the bladder
4665	NAB2 MADER	HP:0000014	Abnormality of the bladder
4747	NEFL NF68 NFL	HP:0000014	Abnormality of the bladder
4771	NF2 SCH	HP:0000014	Abnormality of the bladder
5063	PAK3 OPHN3	HP:0000014	Abnormality of the bladder
5133	PDCD1 PD1	HP:0000014	Abnormality of the bladder
5290	PIK3CA	HP:0000014	Abnormality of the bladder
5376	PMP22 GAS3	HP:0000014	Abnormality of the bladder
5498	PPOX	HP:0000014	Abnormality of the bladder
5610	EIF2AK2 PKR PRKR	HP:0000014	Abnormality of the bladder
5921	RASA1 GAP RASA	HP:0000014	Abnormality of the bladder
6197	RPS6KA3 ISPK1 MAPKAPK1B RSK2	HP:0000014	Abnormality of the bladder
6347	CCL2 MCP1 SCYA2	HP:0000014	Abnormality of the bladder
6509	SLC1A4 ASCT1 SATT	HP:0000014	Abnormality of the bladder
6598	SMARCB1 BAF47 INI1 SNF5L1	HP:0000014	Abnormality of the bladder
6605	SMARCE1 BAF57	HP:0000014	Abnormality of the bladder
6608	SMO SMOH	HP:0000014	Abnormality of the bladder
6778	STAT6	HP:0000014	Abnormality of the bladder
6855	SYP	HP:0000014	Abnormality of the bladder
6862	TBXT T	HP:0000014	Abnormality of the bladder
6904	TBCD KIAA0988 SSD1 TFCD PP1096	HP:0000014	Abnormality of the bladder
7015	TERT EST2 TCS1 TRT	HP:0000014	Abnormality of the bladder
7080	NKX2-1 NKX2A TITF1 TTF1	HP:0000014	Abnormality of the bladder
7102	TSPAN7 A15 DXS1692E MXS1 TM4SF2	HP:0000014	Abnormality of the bladder
7204	TRIO	HP:0000014	Abnormality of the bladder
7319	UBE2A RAD6A	HP:0000014	Abnormality of the bladder
7552	ZNF711 CMPX1 ZNF6	HP:0000014	Abnormality of the bladder
7592	ZNF41	HP:0000014	Abnormality of the bladder
8239	USP9X DFFRX FAM USP9	HP:0000014	Abnormality of the bladder
8291	DYSF FER1L1	HP:0000014	Abnormality of the bladder
8295	TRRAP PAF400	HP:0000014	Abnormality of the bladder
8314	BAP1 KIAA0272 hucep-6	HP:0000014	Abnormality of the bladder
8405	SPOP	HP:0000014	Abnormality of the bladder
9091	PIGQ GPI1	HP:0000014	Abnormality of the bladder
9459	ARHGEF6 COOL2 KIAA0006 PIXA	HP:0000014	Abnormality of the bladder
9681	DEPDC5 KIAA0645	HP:0000014	Abnormality of the bladder
9758	FRMPD4 KIAA0316 PDZD10 PDZK10	HP:0000014	Abnormality of the bladder
9839	ZEB2 KIAA0569 SIP1 ZFHX1B ZFX1B HRIHFB2411	HP:0000014	Abnormality of the bladder
9968	MED12 ARC240 CAGH45 HOPA KIAA0192 TNRC11 TRAP230	HP:0000014	Abnormality of the bladder
10165	SLC25A13 ARALAR2	HP:0000014	Abnormality of the bladder
10466	COG5 GOLTC1 GTC90	HP:0000014	Abnormality of the bladder
10524	KAT5 HTATIP TIP60	HP:0000014	Abnormality of the bladder
11043	MID2 FXY2 RNF60 TRIM1	HP:0000014	Abnormality of the bladder
11141	IL1RAPL1 OPHN4	HP:0000014	Abnormality of the bladder
22866	CNKSR2 CNK2 KIAA0902 KSR2	HP:0000014	Abnormality of the bladder
23096	IQSEC2 KIAA0522	HP:0000014	Abnormality of the bladder
23345	SYNE1 C6orf98 KIAA0796 KIAA1262 KIAA1756 MYNE1	HP:0000014	Abnormality of the bladder
23394	ADNP ADNP1 KIAA0784	HP:0000014	Abnormality of the bladder
23446	SLC44A1 CD92 CDW92 CTL1	HP:0000014	Abnormality of the bladder
24140	FTSJ1 JM23	HP:0000014	Abnormality of the bladder
27086	FOXP1 HSPC215	HP:0000014	Abnormality of the bladder
27235	COQ2 CL640	HP:0000014	Abnormality of the bladder
29081	METTL5 DC3 HSPC133	HP:0000014	Abnormality of the bladder
29940	DSE SART2	HP:0000014	Abnormality of the bladder
51112	TRAPPC12 TRAMM TTC15 CGI-87	HP:0000014	Abnormality of the bladder
51271	UBAP1 NAG20	HP:0000014	Abnormality of the bladder
51684	SUFU UNQ650/PRO1280	HP:0000014	Abnormality of the bladder
54496	PRMT7 KIAA1933	HP:0000014	Abnormality of the bladder
54796	BNC2	HP:0000014	Abnormality of the bladder
54892	NCAPG2 LUZP5	HP:0000014	Abnormality of the bladder
55157	DARS2	HP:0000014	Abnormality of the bladder
55262	TRAPPC14 C7orf43 MAP11	HP:0000014	Abnormality of the bladder
55906	ZC4H2 HCA127 KIAA1166	HP:0000014	Abnormality of the bladder
57010	CABP4	HP:0000014	Abnormality of the bladder
57178	ZMIZ1 KIAA1224 RAI17 ZIMP10	HP:0000014	Abnormality of the bladder
57582	KCNT1 KIAA1422	HP:0000014	Abnormality of the bladder
58508	KMT2C HALR KIAA1506 MLL3	HP:0000014	Abnormality of the bladder
63932	STEEP1 CXorf56	HP:0000014	Abnormality of the bladder
64834	ELOVL1 SSC1 CGI-88	HP:0000014	Abnormality of the bladder
65109	UPF3B RENT3B UPF3X	HP:0000014	Abnormality of the bladder
79628	SH3TC2 KIAA1985 PP12494	HP:0000014	Abnormality of the bladder
79868	ALG13 CXorf45 GLT28D1 MDS031	HP:0000014	Abnormality of the bladder
80114	BICC1	HP:0000014	Abnormality of the bladder
80217	CFAP43 C10orf79 WDR96	HP:0000014	Abnormality of the bladder
84231	TRAF7 RFWD1 RNF119	HP:0000014	Abnormality of the bladder
84679	SLC9A7 NHE7	HP:0000014	Abnormality of the bladder
84842	HPDL GLOXD1	HP:0000014	Abnormality of the bladder
90161	HS6ST2 PSEC0092	HP:0000014	Abnormality of the bladder
93627	TBCK TBCKL HSPC302	HP:0000014	Abnormality of the bladder
93649	MYOCD MYCD	HP:0000014	Abnormality of the bladder
113189	CHST14 D4ST1 UNQ1925/PRO4400	HP:0000014	Abnormality of the bladder
116442	RAB39B	HP:0000014	Abnormality of the bladder
123263	MTFMT FMT FMT1	HP:0000014	Abnormality of the bladder
128486	FITM2 C20orf142 FIT2	HP:0000014	Abnormality of the bladder
139411	PTCHD1	HP:0000014	Abnormality of the bladder
146206	CARMIL2 LRRC16C RLTPR	HP:0000014	Abnormality of the bladder
170302	ARX	HP:0000014	Abnormality of the bladder
253959	RALGAPA1 GARNL1 KIAA0884 TULIP1	HP:0000014	Abnormality of the bladder
339855	KY	HP:0000014	Abnormality of the bladder
347344	ZNF81	HP:0000014	Abnormality of the bladder
389856	USP27X USP22L USP27	HP:0000014	Abnormality of the bladder
1277	COL1A1	HP:0000015	Bladder diverticulum
1290	COL5A2	HP:0000015	Bladder diverticulum
215	ABCD1 ALD	HP:0000016	Urinary retention
353	APRT	HP:0000016	Urinary retention
1161	ERCC8 CKN1 CSA	HP:0000016	Urinary retention
3909	LAMA3 LAMNA	HP:0000016	Urinary retention
3914	LAMB3 LAMNB1	HP:0000016	Urinary retention
3918	LAMC2 LAMB2T LAMNB2	HP:0000016	Urinary retention
4665	NAB2 MADER	HP:0000016	Urinary retention
5921	RASA1 GAP RASA	HP:0000016	Urinary retention
6778	STAT6	HP:0000016	Urinary retention
7840	ALMS1 KIAA0328	HP:0000016	Urinary retention
54796	BNC2	HP:0000016	Urinary retention
79628	SH3TC2 KIAA1985 PP12494	HP:0000016	Urinary retention
186	AGTR2	HP:0000020	Urinary incontinence
207	AKT1 PKB RAC	HP:0000020	Urinary incontinence
823	CAPN1 CANPL1 PIG30	HP:0000020	Urinary incontinence
1135	CHRNA2	HP:0000020	Urinary incontinence
1137	CHRNA4 NACRA4	HP:0000020	Urinary incontinence
1141	CHRNB2	HP:0000020	Urinary incontinence
1183	CLCN4	HP:0000020	Urinary incontinence
1392	CRH	HP:0000020	Urinary incontinence
1741	DLG3 KIAA1232	HP:0000020	Urinary incontinence
1756	DMD	HP:0000020	Urinary incontinence
2182	ACSL4 ACS4 FACL4 LACS4	HP:0000020	Urinary incontinence
2521	FUS TLS	HP:0000020	Urinary incontinence
2581	GALC	HP:0000020	Urinary incontinence
2590	GALNT2	HP:0000020	Urinary incontinence
2664	GDI1 GDIL OPHN2 RABGDIA XAP4	HP:0000020	Urinary incontinence
3054	HCFC1 HCF1 HFC1	HP:0000020	Urinary incontinence
3119	HLA-DQB1 HLA-DQB	HP:0000020	Urinary incontinence
4204	MECP2	HP:0000020	Urinary incontinence
4747	NEFL NF68 NFL	HP:0000020	Urinary incontinence
4771	NF2 SCH	HP:0000020	Urinary incontinence
5063	PAK3 OPHN3	HP:0000020	Urinary incontinence
5133	PDCD1 PD1	HP:0000020	Urinary incontinence
5290	PIK3CA	HP:0000020	Urinary incontinence
5610	EIF2AK2 PKR PRKR	HP:0000020	Urinary incontinence
6197	RPS6KA3 ISPK1 MAPKAPK1B RSK2	HP:0000020	Urinary incontinence
6347	CCL2 MCP1 SCYA2	HP:0000020	Urinary incontinence
6509	SLC1A4 ASCT1 SATT	HP:0000020	Urinary incontinence
6598	SMARCB1 BAF47 INI1 SNF5L1	HP:0000020	Urinary incontinence
6605	SMARCE1 BAF57	HP:0000020	Urinary incontinence
6608	SMO SMOH	HP:0000020	Urinary incontinence
6855	SYP	HP:0000020	Urinary incontinence
6862	TBXT T	HP:0000020	Urinary incontinence
6904	TBCD KIAA0988 SSD1 TFCD PP1096	HP:0000020	Urinary incontinence
7015	TERT EST2 TCS1 TRT	HP:0000020	Urinary incontinence
7102	TSPAN7 A15 DXS1692E MXS1 TM4SF2	HP:0000020	Urinary incontinence
7204	TRIO	HP:0000020	Urinary incontinence
7552	ZNF711 CMPX1 ZNF6	HP:0000020	Urinary incontinence
7592	ZNF41	HP:0000020	Urinary incontinence
7840	ALMS1 KIAA0328	HP:0000020	Urinary incontinence
8239	USP9X DFFRX FAM USP9	HP:0000020	Urinary incontinence
8314	BAP1 KIAA0272 hucep-6	HP:0000020	Urinary incontinence
9459	ARHGEF6 COOL2 KIAA0006 PIXA	HP:0000020	Urinary incontinence
9681	DEPDC5 KIAA0645	HP:0000020	Urinary incontinence
9758	FRMPD4 KIAA0316 PDZD10 PDZK10	HP:0000020	Urinary incontinence
9839	ZEB2 KIAA0569 SIP1 ZFHX1B ZFX1B HRIHFB2411	HP:0000020	Urinary incontinence
9968	MED12 ARC240 CAGH45 HOPA KIAA0192 TNRC11 TRAP230	HP:0000020	Urinary incontinence
10280	SIGMAR1 OPRS1 SRBP AAG8	HP:0000020	Urinary incontinence
10466	COG5 GOLTC1 GTC90	HP:0000020	Urinary incontinence
11043	MID2 FXY2 RNF60 TRIM1	HP:0000020	Urinary incontinence
11141	IL1RAPL1 OPHN4	HP:0000020	Urinary incontinence
22866	CNKSR2 CNK2 KIAA0902 KSR2	HP:0000020	Urinary incontinence
23096	IQSEC2 KIAA0522	HP:0000020	Urinary incontinence
23345	SYNE1 C6orf98 KIAA0796 KIAA1262 KIAA1756 MYNE1	HP:0000020	Urinary incontinence
23394	ADNP ADNP1 KIAA0784	HP:0000020	Urinary incontinence
23446	SLC44A1 CD92 CDW92 CTL1	HP:0000020	Urinary incontinence
24140	FTSJ1 JM23	HP:0000020	Urinary incontinence
27235	COQ2 CL640	HP:0000020	Urinary incontinence
51684	SUFU UNQ650/PRO1280	HP:0000020	Urinary incontinence
54796	BNC2	HP:0000020	Urinary incontinence
55906	ZC4H2 HCA127 KIAA1166	HP:0000020	Urinary incontinence
57010	CABP4	HP:0000020	Urinary incontinence
57582	KCNT1 KIAA1422	HP:0000020	Urinary incontinence
63932	STEEP1 CXorf56	HP:0000020	Urinary incontinence
65109	UPF3B RENT3B UPF3X	HP:0000020	Urinary incontinence
79868	ALG13 CXorf45 GLT28D1 MDS031	HP:0000020	Urinary incontinence
80199	FUZ FY	HP:0000020	Urinary incontinence
80217	CFAP43 C10orf79 WDR96	HP:0000020	Urinary incontinence
81839	VANGL1 STB2	HP:0000020	Urinary incontinence
84231	TRAF7 RFWD1 RNF119	HP:0000020	Urinary incontinence
84679	SLC9A7 NHE7	HP:0000020	Urinary incontinence
90161	HS6ST2 PSEC0092	HP:0000020	Urinary incontinence
116442	RAB39B	HP:0000020	Urinary incontinence
128486	FITM2 C20orf142 FIT2	HP:0000020	Urinary incontinence
139411	PTCHD1	HP:0000020	Urinary incontinence
170302	ARX	HP:0000020	Urinary incontinence
339855	KY	HP:0000020	Urinary incontinence
347344	ZNF81	HP:0000020	Urinary incontinence
389856	USP27X USP22L USP27	HP:0000020	Urinary incontinence
595	CCND1 BCL1 PRAD1	HP:0000022	Abnormality of male internal genitalia
999	CDH1 CDHE UVO	HP:0000022	Abnormality of male internal genitalia
1029	CDKN2A CDKN2 MTS1	HP:0000022	Abnormality of male internal genitalia
2048	EPHB2 DRT EPHT3 EPTH3 ERK HEK5 TYRO5	HP:0000022	Abnormality of male internal genitalia
4193	MDM2	HP:0000022	Abnormality of male internal genitalia
4665	NAB2 MADER	HP:0000022	Abnormality of male internal genitalia
5696	PSMB8 LMP7 PSMB5i RING10 Y2	HP:0000022	Abnormality of male internal genitalia
6778	STAT6	HP:0000022	Abnormality of male internal genitalia
57647	DHX37 DDX37 KIAA1517	HP:0000022	Abnormality of male internal genitalia
1028	CDKN1C KIP2	HP:0000023	Inguinal hernia
1183	CLCN4	HP:0000023	Inguinal hernia
1387	CREBBP CBP	HP:0000023	Inguinal hernia
1656	DDX6 HLR2 RCK	HP:0000023	Inguinal hernia
1801	DPH1 DPH2L DPH2L1 OVCA1	HP:0000023	Inguinal hernia
1859	DYRK1A DYRK MNB MNBH	HP:0000023	Inguinal hernia
1861	TOR1A DQ2 DYT1 TA TORA	HP:0000023	Inguinal hernia
2316	FLNA FLN FLN1	HP:0000023	Inguinal hernia
2972	BRF1 BRF GTF3B TAF3B2 TAF3C	HP:0000023	Inguinal hernia
4094	MAF	HP:0000023	Inguinal hernia
4953	ODC1	HP:0000023	Inguinal hernia
5324	PLAG1	HP:0000023	Inguinal hernia
5518	PPP2R1A	HP:0000023	Inguinal hernia
6134	RPL10 DXS648E QM	HP:0000023	Inguinal hernia
6499	SKIV2L DDX13 SKI2W SKIV2 W	HP:0000023	Inguinal hernia
8091	HMGA2 HMGIC	HP:0000023	Inguinal hernia
8295	TRRAP PAF400	HP:0000023	Inguinal hernia
8788	DLK1 DLK	HP:0000023	Inguinal hernia
9091	PIGQ GPI1	HP:0000023	Inguinal hernia
9158	FIBP	HP:0000023	Inguinal hernia
9652	TTC37 KIAA0372	HP:0000023	Inguinal hernia
10220	GDF11 BMP11	HP:0000023	Inguinal hernia
10297	APC2 APCL	HP:0000023	Inguinal hernia
10664	CTCF	HP:0000023	Inguinal hernia
22872	SEC31A KIAA0905 SEC31L1 HSPC275 HSPC334	HP:0000023	Inguinal hernia
23126	POGZ KIAA0461 SUHW5 ZNF280E ZNF635 Nbla00003	HP:0000023	Inguinal hernia
23291	FBXW11 BTRCP2 FBW1B FBXW1B KIAA0696	HP:0000023	Inguinal hernia
23394	ADNP ADNP1 KIAA0784	HP:0000023	Inguinal hernia
26053	AUTS2 KIAA0442	HP:0000023	Inguinal hernia
29072	SETD2 HIF1 HYPB KIAA1732 KMT3A SET2 HSPC069	HP:0000023	Inguinal hernia
51780	KDM3B C5orf7 JHDM2B JMJD1B KIAA1082	HP:0000023	Inguinal hernia
55617	TASP1 C20orf13	HP:0000023	Inguinal hernia
55690	PACS1 KIAA1175	HP:0000023	Inguinal hernia
57589	RIC1 CIP150 KIAA1432	HP:0000023	Inguinal hernia
58508	KMT2C HALR KIAA1506 MLL3	HP:0000023	Inguinal hernia
81857	MED25 ACID1 ARC92 PTOV2 TCBAP0758	HP:0000023	Inguinal hernia
113189	CHST14 D4ST1 UNQ1925/PRO4400	HP:0000023	Inguinal hernia
388015	RTL1 MAR1 MART1 PEG11	HP:0000023	Inguinal hernia
215	ABCD1 ALD	HP:0000025	Functional abnormality of male internal genitalia
650	BMP2 BMP2A	HP:0000025	Functional abnormality of male internal genitalia
1161	ERCC8 CKN1 CSA	HP:0000025	Functional abnormality of male internal genitalia
1760	DMPK DM1PK MDPK	HP:0000025	Functional abnormality of male internal genitalia
1767	DNAH5 DNAHC5 HL1 KIAA1603	HP:0000025	Functional abnormality of male internal genitalia
1769	DNAH8	HP:0000025	Functional abnormality of male internal genitalia
2067	ERCC1	HP:0000025	Functional abnormality of male internal genitalia
2302	FOXJ1 FKHL13 HFH4	HP:0000025	Functional abnormality of male internal genitalia
2622	GAS8 DRC4 GAS11	HP:0000025	Functional abnormality of male internal genitalia
2629	GBA GC GLUC	HP:0000025	Functional abnormality of male internal genitalia
5310	PKD1	HP:0000025	Functional abnormality of male internal genitalia
5311	PKD2 TRPP2	HP:0000025	Functional abnormality of male internal genitalia
5422	POLA1 POLA	HP:0000025	Functional abnormality of male internal genitalia
6103	RPGR RP3 XLRP3	HP:0000025	Functional abnormality of male internal genitalia
6674	SPAG1	HP:0000025	Functional abnormality of male internal genitalia
8481	OFD1 CXorf5	HP:0000025	Functional abnormality of male internal genitalia
8632	DNAH17 DNAHL1 DNEL2	HP:0000025	Functional abnormality of male internal genitalia
8701	DNAH11	HP:0000025	Functional abnormality of male internal genitalia
8915	BCL10 CIPER CLAP	HP:0000025	Functional abnormality of male internal genitalia
10309	CCNO	HP:0000025	Functional abnormality of male internal genitalia
10371	SEMA3A SEMAD	HP:0000025	Functional abnormality of male internal genitalia
10388	SYCP2 SCP2	HP:0000025	Functional abnormality of male internal genitalia
22873	DZIP1 DZIP DZIP2 KIAA0996	HP:0000025	Functional abnormality of male internal genitalia
23193	GANAB G2AN KIAA0088	HP:0000025	Functional abnormality of male internal genitalia
25981	DNAH1 DHC7 DNAHC1 KIAA1410	HP:0000025	Functional abnormality of male internal genitalia
27019	DNAI1	HP:0000025	Functional abnormality of male internal genitalia
27148	STK36 KIAA1278	HP:0000025	Functional abnormality of male internal genitalia
51314	NME8 SPTRX2 TXNDC3	HP:0000025	Functional abnormality of male internal genitalia
54768	HYDIN HYDIN1 KIAA1864	HP:0000025	Functional abnormality of male internal genitalia
54970	TTC12	HP:0000025	Functional abnormality of male internal genitalia
55036	CCDC40 KIAA1640	HP:0000025	Functional abnormality of male internal genitalia
55130	ODAD2 ARMC4	HP:0000025	Functional abnormality of male internal genitalia
55172	DNAAF2 C14orf104 KTU	HP:0000025	Functional abnormality of male internal genitalia
57647	DHX37 DDX37 KIAA1517	HP:0000025	Functional abnormality of male internal genitalia
64446	DNAI2	HP:0000025	Functional abnormality of male internal genitalia
64682	ANAPC1 TSG24	HP:0000025	Functional abnormality of male internal genitalia
79184	BRCC3 BRCC36 C6.1A CXorf53	HP:0000025	Functional abnormality of male internal genitalia
79846	CFAP69 C7orf63	HP:0000025	Functional abnormality of male internal genitalia
79925	SPEF2 KIAA1770 KPL2	HP:0000025	Functional abnormality of male internal genitalia
80114	BICC1	HP:0000025	Functional abnormality of male internal genitalia
83538	ODAD4 TTC25	HP:0000025	Functional abnormality of male internal genitalia
83544	DNAL1 C14orf168	HP:0000025	Functional abnormality of male internal genitalia
83894	TTC29	HP:0000025	Functional abnormality of male internal genitalia
84071	ARMC2	HP:0000025	Functional abnormality of male internal genitalia
85016	CFAP300 C11orf70	HP:0000025	Functional abnormality of male internal genitalia
85478	CCDC65 DRC2	HP:0000025	Functional abnormality of male internal genitalia
89765	RSPH1 TSA2 TSGA2	HP:0000025	Functional abnormality of male internal genitalia
92749	DRC1 C2orf39 CCDC164	HP:0000025	Functional abnormality of male internal genitalia
93233	ODAD1 CCDC114	HP:0000025	Functional abnormality of male internal genitalia
115399	LRRC56	HP:0000025	Functional abnormality of male internal genitalia
115948	ODAD3 CCDC151	HP:0000025	Functional abnormality of male internal genitalia
118491	CFAP70 TTC18	HP:0000025	Functional abnormality of male internal genitalia
123872	DNAAF1 LRRC50	HP:0000025	Functional abnormality of male internal genitalia
130951	M1AP C2orf65 SPATA37	HP:0000025	Functional abnormality of male internal genitalia
139212	DNAAF6 CXorf41 PIH1D3	HP:0000025	Functional abnormality of male internal genitalia
146754	DNAH2 DNAHC2 DNHD3 KIAA1503	HP:0000025	Functional abnormality of male internal genitalia
152110	NEK10	HP:0000025	Functional abnormality of male internal genitalia
159686	CFAP58 C10orf80 CCDC147	HP:0000025	Functional abnormality of male internal genitalia
161582	DNAAF4 DYX1C1 EKN1	HP:0000025	Functional abnormality of male internal genitalia
200373	CFAP221 PCDP1	HP:0000025	Functional abnormality of male internal genitalia
201134	CEP112 CCDC46	HP:0000025	Functional abnormality of male internal genitalia
246176	GAS2L2 GAR17	HP:0000025	Functional abnormality of male internal genitalia
255101	CFAP65 CCDC108	HP:0000025	Functional abnormality of male internal genitalia
317761	SIX6OS1 C14orf39	HP:0000025	Functional abnormality of male internal genitalia
339829	CCDC39	HP:0000025	Functional abnormality of male internal genitalia
345643	MCIDAS IDAS MCI MCIN	HP:0000025	Functional abnormality of male internal genitalia
345895	RSPH4A RSHL3	HP:0000025	Functional abnormality of male internal genitalia
352909	DNAAF3 C19orf51	HP:0000025	Functional abnormality of male internal genitalia
374407	DNAJB13 TSARG3 TSARG6	HP:0000025	Functional abnormality of male internal genitalia
388389	CCDC103	HP:0000025	Functional abnormality of male internal genitalia
215	ABCD1 ALD	HP:0000026	Male hypogonadism
1161	ERCC8 CKN1 CSA	HP:0000026	Male hypogonadism
1760	DMPK DM1PK MDPK	HP:0000026	Male hypogonadism
2067	ERCC1	HP:0000026	Male hypogonadism
2072	ERCC4 ERCC11 XPF	HP:0000026	Male hypogonadism
5422	POLA1 POLA	HP:0000026	Male hypogonadism
64682	ANAPC1 TSG24	HP:0000026	Male hypogonadism
650	BMP2 BMP2A	HP:0000027	Azoospermia
2629	GBA GC GLUC	HP:0000027	Azoospermia
8915	BCL10 CIPER CLAP	HP:0000027	Azoospermia
10371	SEMA3A SEMAD	HP:0000027	Azoospermia
10388	SYCP2 SCP2	HP:0000027	Azoospermia
57647	DHX37 DDX37 KIAA1517	HP:0000027	Azoospermia
79184	BRCC3 BRCC36 C6.1A CXorf53	HP:0000027	Azoospermia
130951	M1AP C2orf65 SPATA37	HP:0000027	Azoospermia
317761	SIX6OS1 C14orf39	HP:0000027	Azoospermia
86	ACTL6A BAF53 BAF53A INO80K	HP:0000028	Cryptorchidism
104	ADARB1 ADAR2 DRADA2 RED1	HP:0000028	Cryptorchidism
1000	CDH2 CDHN NCAD	HP:0000028	Cryptorchidism
1024	CDK8	HP:0000028	Cryptorchidism
1109	AKR1C4 CHDR	HP:0000028	Cryptorchidism
1183	CLCN4	HP:0000028	Cryptorchidism
1656	DDX6 HLR2 RCK	HP:0000028	Cryptorchidism
1788	DNMT3A	HP:0000028	Cryptorchidism
1795	DOCK3 KIAA0299 MOCA	HP:0000028	Cryptorchidism
1822	ATN1 D12S755E DRPLA	HP:0000028	Cryptorchidism
1859	DYRK1A DYRK MNB MNBH	HP:0000028	Cryptorchidism
2067	ERCC1	HP:0000028	Cryptorchidism
2186	BPTF FAC1 FALZ	HP:0000028	Cryptorchidism
2192	FBLN1 PP213	HP:0000028	Cryptorchidism
2222	FDFT1	HP:0000028	Cryptorchidism
2255	FGF10	HP:0000028	Cryptorchidism
2324	FLT4 VEGFR3	HP:0000028	Cryptorchidism
2592	GALT	HP:0000028	Cryptorchidism
2891	GRIA2 GLUR2	HP:0000028	Cryptorchidism
2892	GRIA3 GLUR3 GLURC	HP:0000028	Cryptorchidism
2972	BRF1 BRF GTF3B TAF3B2 TAF3C	HP:0000028	Cryptorchidism
4010	LMX1B	HP:0000028	Cryptorchidism
4047	LSS OSC	HP:0000028	Cryptorchidism
4094	MAF	HP:0000028	Cryptorchidism
4659	PPP1R12A MBS MYPT1	HP:0000028	Cryptorchidism
4784	NFIX	HP:0000028	Cryptorchidism
4948	OCA2 D15S12 P	HP:0000028	Cryptorchidism
4953	ODC1	HP:0000028	Cryptorchidism
5081	PAX7 HUP1	HP:0000028	Cryptorchidism
5324	PLAG1	HP:0000028	Cryptorchidism
5422	POLA1 POLA	HP:0000028	Cryptorchidism
5455	POU3F3 BRN1 OTF8	HP:0000028	Cryptorchidism
5594	MAPK1 ERK2 PRKM1 PRKM2	HP:0000028	Cryptorchidism
5879	RAC1 TC25 MIG5	HP:0000028	Cryptorchidism
5881	RAC3	HP:0000028	Cryptorchidism
6095	RORA NR1F1 RZRA	HP:0000028	Cryptorchidism
6492	SIM1 BHLHE14	HP:0000028	Cryptorchidism
6572	SLC18A3 VACHT	HP:0000028	Cryptorchidism
6602	SMARCD1 BAF60A	HP:0000028	Cryptorchidism
6659	SOX4	HP:0000028	Cryptorchidism
6812	STXBP1 UNC18A	HP:0000028	Cryptorchidism
6897	TARS1 TARS	HP:0000028	Cryptorchidism
6942	TCF20 KIAA0292 SPBP	HP:0000028	Cryptorchidism
7319	UBE2A RAD6A	HP:0000028	Cryptorchidism
7874	USP7 HAUSP	HP:0000028	Cryptorchidism
8087	FXR1	HP:0000028	Cryptorchidism
8091	HMGA2 HMGIC	HP:0000028	Cryptorchidism
8241	RBM10 DXS8237E GPATC9 GPATCH9 KIAA0122	HP:0000028	Cryptorchidism
8295	TRRAP PAF400	HP:0000028	Cryptorchidism
8567	MADD DENN IG20 KIAA0358	HP:0000028	Cryptorchidism
8788	DLK1 DLK	HP:0000028	Cryptorchidism
9653	HS2ST1 HS2ST KIAA0448	HP:0000028	Cryptorchidism
9969	MED13 ARC250 KIAA0593 THRAP1 TRAP240	HP:0000028	Cryptorchidism
10046	MAMLD1 CG1 CXorf6	HP:0000028	Cryptorchidism
10075	HUWE1 KIAA0312 KIAA1578 UREB1 HSPC272	HP:0000028	Cryptorchidism
10466	COG5 GOLTC1 GTC90	HP:0000028	Cryptorchidism
10524	KAT5 HTATIP TIP60	HP:0000028	Cryptorchidism
22800	RRAS2 TC21	HP:0000028	Cryptorchidism
22808	MRAS RRAS3	HP:0000028	Cryptorchidism
22854	NTNG1 KIAA0976 LMNT1 UNQ571/PRO1133	HP:0000028	Cryptorchidism
22884	WDR37 KIAA0982	HP:0000028	Cryptorchidism
23001	WDFY3 KIAA0993	HP:0000028	Cryptorchidism
23040	MYT1L KIAA1106	HP:0000028	Cryptorchidism
23135	KDM6B JMJD3 KIAA0346	HP:0000028	Cryptorchidism
23291	FBXW11 BTRCP2 FBW1B FBXW1B KIAA0696	HP:0000028	Cryptorchidism
23314	SATB2 KIAA1034	HP:0000028	Cryptorchidism
23345	SYNE1 C6orf98 KIAA0796 KIAA1262 KIAA1756 MYNE1	HP:0000028	Cryptorchidism
23394	ADNP ADNP1 KIAA0784	HP:0000028	Cryptorchidism
25914	RTTN	HP:0000028	Cryptorchidism
26005	C2CD3	HP:0000028	Cryptorchidism
26053	AUTS2 KIAA0442	HP:0000028	Cryptorchidism
26115	TANC2 KIAA1148 KIAA1636	HP:0000028	Cryptorchidism
26275	HIBCH	HP:0000028	Cryptorchidism
28957	MRPS28 MRPS35 HSPC007	HP:0000028	Cryptorchidism
29895	MYLPF	HP:0000028	Cryptorchidism
29940	DSE SART2	HP:0000028	Cryptorchidism
51399	TRAPPC4 SBDN CGI-104 HSPC172 PTD009	HP:0000028	Cryptorchidism
51412	ACTL6B ACTL6 BAF53B	HP:0000028	Cryptorchidism
51780	KDM3B C5orf7 JHDM2B JMJD1B KIAA1082	HP:0000028	Cryptorchidism
54496	PRMT7 KIAA1933	HP:0000028	Cryptorchidism
55617	TASP1 C20orf13	HP:0000028	Cryptorchidism
55621	TRMT1	HP:0000028	Cryptorchidism
55681	SCYL2 CVAK104 KIAA1360	HP:0000028	Cryptorchidism
55904	KMT2E MLL5	HP:0000028	Cryptorchidism
57020	VPS35L C16orf62 101F10.2	HP:0000028	Cryptorchidism
57178	ZMIZ1 KIAA1224 RAI17 ZIMP10	HP:0000028	Cryptorchidism
57187	THOC2 CXorf3	HP:0000028	Cryptorchidism
57647	DHX37 DDX37 KIAA1517	HP:0000028	Cryptorchidism
63035	BCORL1	HP:0000028	Cryptorchidism
64682	ANAPC1 TSG24	HP:0000028	Cryptorchidism
79576	NKAP	HP:0000028	Cryptorchidism
79625	NDNF C4orf31 UNQ2748/PRO6487	HP:0000028	Cryptorchidism
84340	GFM2 EFG2 MSTP027	HP:0000028	Cryptorchidism
84823	LMNB2 LMN2	HP:0000028	Cryptorchidism
90416	CCDC32 C15orf57	HP:0000028	Cryptorchidism
91801	ALKBH8 ABH8	HP:0000028	Cryptorchidism
93627	TBCK TBCKL HSPC302	HP:0000028	Cryptorchidism
114034	TOE1	HP:0000028	Cryptorchidism
317662	FAM149B1 KIAA0974	HP:0000028	Cryptorchidism
374969	SVBP CCDC23	HP:0000028	Cryptorchidism
388015	RTL1 MAR1 MART1 PEG11	HP:0000028	Cryptorchidism
650	BMP2 BMP2A	HP:0000029	Testicular atrophy
57647	DHX37 DDX37 KIAA1517	HP:0000030	Testicular gonadoblastoma
86	ACTL6A BAF53 BAF53A INO80K	HP:0000032	Abnormality of male external genitalia
104	ADARB1 ADAR2 DRADA2 RED1	HP:0000032	Abnormality of male external genitalia
650	BMP2 BMP2A	HP:0000032	Abnormality of male external genitalia
833	CARS1 CARS	HP:0000032	Abnormality of male external genitalia
1000	CDH2 CDHN NCAD	HP:0000032	Abnormality of male external genitalia
1024	CDK8	HP:0000032	Abnormality of male external genitalia
[truncated: 126,118 more rows]
