# Supplementary material for: Integration of Human Protein Sequence and Protein-Protein Interaction Data by Graph Autoencoder to Identify Novel Protein-Abnormal Phenotype Associations
Source: Cells. 2022 Aug 10;11(16):2485. doi: 10.3390/cells11162485 (PMC9406402; doi:10.3390/cells11162485)
Supplement: Supplementary file 1 [file cells-11-02485-s001.zip › Supplementary Table S2.xlsx]

## Sheet: Table S2A
Supplementary Table S2A. Comparison training dataset.
Comparison training dataset contains phenotype annotations that were available before January 2014.
Gene Name	HPO Term ID	HPO Term Name
3BHS2_HUMAN	HP:0000001	All
3BHS7_HUMAN	HP:0000001	All
3BP2_HUMAN	HP:0000001	All
5HT1A_HUMAN	HP:0000001	All
5NTD_HUMAN	HP:0000001	All
6PGD_HUMAN	HP:0000001	All
A2AP_HUMAN	HP:0000001	All
A2MG_HUMAN	HP:0000001	All
AAAS_HUMAN	HP:0000001	All
AAGAB_HUMAN	HP:0000001	All
AAKG2_HUMAN	HP:0000001	All
AASS_HUMAN	HP:0000001	All
ABCA3_HUMAN	HP:0000001	All
ABCA4_HUMAN	HP:0000001	All
ABCAC_HUMAN	HP:0000001	All
ABCB6_HUMAN	HP:0000001	All
ABCB7_HUMAN	HP:0000001	All
ABCBB_HUMAN	HP:0000001	All
ABCC8_HUMAN	HP:0000001	All
ABCC9_HUMAN	HP:0000001	All
ABCD1_HUMAN	HP:0000001	All
ABCD3_HUMAN	HP:0000001	All
ABCD4_HUMAN	HP:0000001	All
ABCG8_HUMAN	HP:0000001	All
ABHD5_HUMAN	HP:0000001	All
ABL1_HUMAN	HP:0000001	All
ACAD8_HUMAN	HP:0000001	All
ACAD9_HUMAN	HP:0000001	All
ACADM_HUMAN	HP:0000001	All
ACADS_HUMAN	HP:0000001	All
ACADV_HUMAN	HP:0000001	All
ACATN_HUMAN	HP:0000001	All
ACDSB_HUMAN	HP:0000001	All
ACE_HUMAN	HP:0000001	All
ACHA2_HUMAN	HP:0000001	All
ACHA4_HUMAN	HP:0000001	All
ACHA_HUMAN	HP:0000001	All
ACHB2_HUMAN	HP:0000001	All
ACHB_HUMAN	HP:0000001	All
ACHD_HUMAN	HP:0000001	All
ACHE_HUMAN	HP:0000001	All
ACHG_HUMAN	HP:0000001	All
ACM3_HUMAN	HP:0000001	All
ACON_HUMAN	HP:0000001	All
ACSF3_HUMAN	HP:0000001	All
ACSL4_HUMAN	HP:0000001	All
ACTA_HUMAN	HP:0000001	All
ACTC_HUMAN	HP:0000001	All
ACTG_HUMAN	HP:0000001	All
ACTHR_HUMAN	HP:0000001	All
ACTN1_HUMAN	HP:0000001	All
ACTN2_HUMAN	HP:0000001	All
ACTN4_HUMAN	HP:0000001	All
ACTS_HUMAN	HP:0000001	All
ACVL1_HUMAN	HP:0000001	All
ACY1_HUMAN	HP:0000001	All
ADA17_HUMAN	HP:0000001	All
ADAM9_HUMAN	HP:0000001	All
ADAS_HUMAN	HP:0000001	All
ADA_HUMAN	HP:0000001	All
ADCY5_HUMAN	HP:0000001	All
ADT1_HUMAN	HP:0000001	All
AF10_HUMAN	HP:0000001	All
AF9_HUMAN	HP:0000001	All
AFF1_HUMAN	HP:0000001	All
AFG32_HUMAN	HP:0000001	All
AGK_HUMAN	HP:0000001	All
AGRIN_HUMAN	HP:0000001	All
AGTR1_HUMAN	HP:0000001	All
AGTR2_HUMAN	HP:0000001	All
AHI1_HUMAN	HP:0000001	All
AICDA_HUMAN	HP:0000001	All
AIMP1_HUMAN	HP:0000001	All
AIPL1_HUMAN	HP:0000001	All
AIP_HUMAN	HP:0000001	All
AIRE_HUMAN	HP:0000001	All
AK1C2_HUMAN	HP:0000001	All
AK1D1_HUMAN	HP:0000001	All
AKT1_HUMAN	HP:0000001	All
AKT2_HUMAN	HP:0000001	All
AKT3_HUMAN	HP:0000001	All
AL1A1_HUMAN	HP:0000001	All
AL1A3_HUMAN	HP:0000001	All
AL3A2_HUMAN	HP:0000001	All
AL7A1_HUMAN	HP:0000001	All
ALDH2_HUMAN	HP:0000001	All
ALDOA_HUMAN	HP:0000001	All
ALDOB_HUMAN	HP:0000001	All
ALG11_HUMAN	HP:0000001	All
ALG12_HUMAN	HP:0000001	All
ALG1_HUMAN	HP:0000001	All
ALG2_HUMAN	HP:0000001	All
ALG3_HUMAN	HP:0000001	All
ALG6_HUMAN	HP:0000001	All
ALG8_HUMAN	HP:0000001	All
ALG9_HUMAN	HP:0000001	All
ALK_HUMAN	HP:0000001	All
ALMS1_HUMAN	HP:0000001	All
ALR_HUMAN	HP:0000001	All
ALS2_HUMAN	HP:0000001	All
ALX1_HUMAN	HP:0000001	All
ALX3_HUMAN	HP:0000001	All
ALX4_HUMAN	HP:0000001	All
AMELX_HUMAN	HP:0000001	All
AMER1_HUMAN	HP:0000001	All
AMHR2_HUMAN	HP:0000001	All
AMNLS_HUMAN	HP:0000001	All
AMPD1_HUMAN	HP:0000001	All
ANDR_HUMAN	HP:0000001	All
ANF_HUMAN	HP:0000001	All
ANGI_HUMAN	HP:0000001	All
ANGT_HUMAN	HP:0000001	All
ANK2_HUMAN	HP:0000001	All
ANK3_HUMAN	HP:0000001	All
ANKH_HUMAN	HP:0000001	All
ANO6_HUMAN	HP:0000001	All
ANR11_HUMAN	HP:0000001	All
ANR26_HUMAN	HP:0000001	All
ANR55_HUMAN	HP:0000001	All
ANTR1_HUMAN	HP:0000001	All
ANTR2_HUMAN	HP:0000001	All
AOFA_HUMAN	HP:0000001	All
AOFB_HUMAN	HP:0000001	All
AP1S1_HUMAN	HP:0000001	All
AP1S2_HUMAN	HP:0000001	All
AP2A_HUMAN	HP:0000001	All
AP2B_HUMAN	HP:0000001	All
AP2S1_HUMAN	HP:0000001	All
AP3B1_HUMAN	HP:0000001	All
AP4B1_HUMAN	HP:0000001	All
AP4E1_HUMAN	HP:0000001	All
AP4M1_HUMAN	HP:0000001	All
AP4S1_HUMAN	HP:0000001	All
AP5Z1_HUMAN	HP:0000001	All
APCD1_HUMAN	HP:0000001	All
APC_HUMAN	HP:0000001	All
APOA1_HUMAN	HP:0000001	All
APOA5_HUMAN	HP:0000001	All
APOC2_HUMAN	HP:0000001	All
APOC3_HUMAN	HP:0000001	All
APOE_HUMAN	HP:0000001	All
APT_HUMAN	HP:0000001	All
AQP2_HUMAN	HP:0000001	All
AQP5_HUMAN	HP:0000001	All
AR13B_HUMAN	HP:0000001	All
AR2BP_HUMAN	HP:0000001	All
ARAF_HUMAN	HP:0000001	All
ARGI1_HUMAN	HP:0000001	All
ARHG6_HUMAN	HP:0000001	All
ARHG9_HUMAN	HP:0000001	All
ARHGA_HUMAN	HP:0000001	All
ARHGC_HUMAN	HP:0000001	All
ARH_HUMAN	HP:0000001	All
ARI1B_HUMAN	HP:0000001	All
ARL6_HUMAN	HP:0000001	All
ARLY_HUMAN	HP:0000001	All
ARRS_HUMAN	HP:0000001	All
ARSA_HUMAN	HP:0000001	All
ARSB_HUMAN	HP:0000001	All
ARVC_HUMAN	HP:0000001	All
ARY1_HUMAN	HP:0000001	All
ASAH1_HUMAN	HP:0000001	All
ASCC1_HUMAN	HP:0000001	All
ASCL1_HUMAN	HP:0000001	All
ASM_HUMAN	HP:0000001	All
ASPC1_HUMAN	HP:0000001	All
ASPG_HUMAN	HP:0000001	All
ASSY_HUMAN	HP:0000001	All
AT132_HUMAN	HP:0000001	All
AT1A2_HUMAN	HP:0000001	All
AT1A3_HUMAN	HP:0000001	All
AT2A1_HUMAN	HP:0000001	All
AT2A2_HUMAN	HP:0000001	All
AT2B3_HUMAN	HP:0000001	All
AT8A2_HUMAN	HP:0000001	All
AT8B1_HUMAN	HP:0000001	All
ATCAY_HUMAN	HP:0000001	All
ATL2_HUMAN	HP:0000001	All
ATL4_HUMAN	HP:0000001	All
ATLA1_HUMAN	HP:0000001	All
ATM_HUMAN	HP:0000001	All
ATN1_HUMAN	HP:0000001	All
ATNG_HUMAN	HP:0000001	All
ATP5E_HUMAN	HP:0000001	All
ATP7A_HUMAN	HP:0000001	All
ATP7B_HUMAN	HP:0000001	All
ATPA_HUMAN	HP:0000001	All
ATPF2_HUMAN	HP:0000001	All
ATR_HUMAN	HP:0000001	All
ATS13_HUMAN	HP:0000001	All
ATS17_HUMAN	HP:0000001	All
ATS18_HUMAN	HP:0000001	All
ATTY_HUMAN	HP:0000001	All
ATX10_HUMAN	HP:0000001	All
ATX1_HUMAN	HP:0000001	All
ATX2_HUMAN	HP:0000001	All
ATX7_HUMAN	HP:0000001	All
AUHM_HUMAN	HP:0000001	All
AURKC_HUMAN	HP:0000001	All
AUXI_HUMAN	HP:0000001	All
AVR2B_HUMAN	HP:0000001	All
AXIN1_HUMAN	HP:0000001	All
AXIN2_HUMAN	HP:0000001	All
B2MG_HUMAN	HP:0000001	All
B3AT_HUMAN	HP:0000001	All
B3GA3_HUMAN	HP:0000001	All
B3GL2_HUMAN	HP:0000001	All
B3GLT_HUMAN	HP:0000001	All
B3GT6_HUMAN	HP:0000001	All
B4GT7_HUMAN	HP:0000001	All
B9D1_HUMAN	HP:0000001	All
BAAT_HUMAN	HP:0000001	All
BAF_HUMAN	HP:0000001	All
BAG3_HUMAN	HP:0000001	All
BAP1_HUMAN	HP:0000001	All
BAP31_HUMAN	HP:0000001	All
BAT1_HUMAN	HP:0000001	All
BBS10_HUMAN	HP:0000001	All
BBS12_HUMAN	HP:0000001	All
BBS1_HUMAN	HP:0000001	All
BBS2_HUMAN	HP:0000001	All
BBS4_HUMAN	HP:0000001	All
BBS5_HUMAN	HP:0000001	All
BBS7_HUMAN	HP:0000001	All
BCDO1_HUMAN	HP:0000001	All
BCKD_HUMAN	HP:0000001	All
BCL10_HUMAN	HP:0000001	All
BCL2_HUMAN	HP:0000001	All
BCR_HUMAN	HP:0000001	All
BCS1_HUMAN	HP:0000001	All
BEAN1_HUMAN	HP:0000001	All
BEST1_HUMAN	HP:0000001	All
BFSP1_HUMAN	HP:0000001	All
BFSP2_HUMAN	HP:0000001	All
BGAL_HUMAN	HP:0000001	All
BGLR_HUMAN	HP:0000001	All
BHA09_HUMAN	HP:0000001	All
BICD2_HUMAN	HP:0000001	All
BIEA_HUMAN	HP:0000001	All
BIG2_HUMAN	HP:0000001	All
BL1S3_HUMAN	HP:0000001	All
BLK_HUMAN	HP:0000001	All
BLM_HUMAN	HP:0000001	All
BLNK_HUMAN	HP:0000001	All
BMP15_HUMAN	HP:0000001	All
BMP4_HUMAN	HP:0000001	All
BMPER_HUMAN	HP:0000001	All
BMPR2_HUMAN	HP:0000001	All
BMR1A_HUMAN	HP:0000001	All
BMR1B_HUMAN	HP:0000001	All
BOLA3_HUMAN	HP:0000001	All
BPL1_HUMAN	HP:0000001	All
BRCA1_HUMAN	HP:0000001	All
BRCA2_HUMAN	HP:0000001	All
BSCL2_HUMAN	HP:0000001	All
BSND_HUMAN	HP:0000001	All
BTD_HUMAN	HP:0000001	All
BTK_HUMAN	HP:0000001	All
BUB1_HUMAN	HP:0000001	All
BUB3_HUMAN	HP:0000001	All
BUP1_HUMAN	HP:0000001	All
C10_HUMAN	HP:0000001	All
C11B1_HUMAN	HP:0000001	All
C11B2_HUMAN	HP:0000001	All
C1GLC_HUMAN	HP:0000001	All
C1QA_HUMAN	HP:0000001	All
C1QB_HUMAN	HP:0000001	All
C1QC_HUMAN	HP:0000001	All
C1QT5_HUMAN	HP:0000001	All
C1R_HUMAN	HP:0000001	All
C2D1A_HUMAN	HP:0000001	All
C2D2A_HUMAN	HP:0000001	All
C2TA_HUMAN	HP:0000001	All
C560_HUMAN	HP:0000001	All
CA2D4_HUMAN	HP:0000001	All
CABP4_HUMAN	HP:0000001	All
CAC1D_HUMAN	HP:0000001	All
CAC1F_HUMAN	HP:0000001	All
CAC1S_HUMAN	HP:0000001	All
CACB4_HUMAN	HP:0000001	All
CADH1_HUMAN	HP:0000001	All
CADH3_HUMAN	HP:0000001	All
CAH12_HUMAN	HP:0000001	All
CAH2_HUMAN	HP:0000001	All
CAH8_HUMAN	HP:0000001	All
CALR3_HUMAN	HP:0000001	All
CAN3_HUMAN	HP:0000001	All
CANT1_HUMAN	HP:0000001	All
CAR11_HUMAN	HP:0000001	All
CAR14_HUMAN	HP:0000001	All
CARD9_HUMAN	HP:0000001	All
CASQ2_HUMAN	HP:0000001	All
CASR_HUMAN	HP:0000001	All
CATA_HUMAN	HP:0000001	All
CATD_HUMAN	HP:0000001	All
CATH_HUMAN	HP:0000001	All
CATK_HUMAN	HP:0000001	All
CAV1_HUMAN	HP:0000001	All
CAV3_HUMAN	HP:0000001	All
CBG_HUMAN	HP:0000001	All
CBL_HUMAN	HP:0000001	All
CBPA6_HUMAN	HP:0000001	All
CBP_HUMAN	HP:0000001	All
CBX2_HUMAN	HP:0000001	All
CC103_HUMAN	HP:0000001	All
CCBE1_HUMAN	HP:0000001	All
CCD39_HUMAN	HP:0000001	All
CCD40_HUMAN	HP:0000001	All
CCD50_HUMAN	HP:0000001	All
CCDC6_HUMAN	HP:0000001	All
CCDC8_HUMAN	HP:0000001	All
CCG2_HUMAN	HP:0000001	All
CCHL_HUMAN	HP:0000001	All
CCL11_HUMAN	HP:0000001	All
CCND1_HUMAN	HP:0000001	All
CD151_HUMAN	HP:0000001	All
CD19_HUMAN	HP:0000001	All
CD20_HUMAN	HP:0000001	All
CD27_HUMAN	HP:0000001	All
CD2AP_HUMAN	HP:0000001	All
CD320_HUMAN	HP:0000001	All
CD3D_HUMAN	HP:0000001	All
CD3E_HUMAN	HP:0000001	All
CD3G_HUMAN	HP:0000001	All
CD3Z_HUMAN	HP:0000001	All
CD79A_HUMAN	HP:0000001	All
CD79B_HUMAN	HP:0000001	All
CD81_HUMAN	HP:0000001	All
CD8A_HUMAN	HP:0000001	All
CDAN1_HUMAN	HP:0000001	All
CDC6_HUMAN	HP:0000001	All
CDC73_HUMAN	HP:0000001	All
CDHR1_HUMAN	HP:0000001	All
CDK4_HUMAN	HP:0000001	All
CDKL5_HUMAN	HP:0000001	All
CDN1B_HUMAN	HP:0000001	All
CDN2B_HUMAN	HP:0000001	All
CDN2D_HUMAN	HP:0000001	All
CDON_HUMAN	HP:0000001	All
CDR1_HUMAN	HP:0000001	All
CDT1_HUMAN	HP:0000001	All
CE152_HUMAN	HP:0000001	All
CE164_HUMAN	HP:0000001	All
CE290_HUMAN	HP:0000001	All
CEA16_HUMAN	HP:0000001	All
CEAM5_HUMAN	HP:0000001	All
CEBPA_HUMAN	HP:0000001	All
CEBPE_HUMAN	HP:0000001	All
CENPJ_HUMAN	HP:0000001	All
CEP63_HUMAN	HP:0000001	All
CERS3_HUMAN	HP:0000001	All
CERU_HUMAN	HP:0000001	All
CETP_HUMAN	HP:0000001	All
CFAD_HUMAN	HP:0000001	All
CFAI_HUMAN	HP:0000001	All
CFC1_HUMAN	HP:0000001	All
CFTR_HUMAN	HP:0000001	All
CGL_HUMAN	HP:0000001	All
CH60_HUMAN	HP:0000001	All
CHD2_HUMAN	HP:0000001	All
CHIN_HUMAN	HP:0000001	All
CHKB_HUMAN	HP:0000001	All
CHLE_HUMAN	HP:0000001	All
CHM1A_HUMAN	HP:0000001	All
CHM2B_HUMAN	HP:0000001	All
CHM4B_HUMAN	HP:0000001	All
CHSS1_HUMAN	HP:0000001	All
CHST3_HUMAN	HP:0000001	All
CHST6_HUMAN	HP:0000001	All
CHSTE_HUMAN	HP:0000001	All
CI072_HUMAN	HP:0000001	All
CIA30_HUMAN	HP:0000001	All
CIDEC_HUMAN	HP:0000001	All
CISD2_HUMAN	HP:0000001	All
CITE2_HUMAN	HP:0000001	All
CL065_HUMAN	HP:0000001	All
CLAT_HUMAN	HP:0000001	All
CLCF1_HUMAN	HP:0000001	All
CLCKA_HUMAN	HP:0000001	All
CLCKB_HUMAN	HP:0000001	All
CLCN1_HUMAN	HP:0000001	All
CLCN5_HUMAN	HP:0000001	All
CLCN7_HUMAN	HP:0000001	All
CLD19_HUMAN	HP:0000001	All
CLIC2_HUMAN	HP:0000001	All
CLN6_HUMAN	HP:0000001	All
CLN8_HUMAN	HP:0000001	All
CLPP_HUMAN	HP:0000001	All
CLRN1_HUMAN	HP:0000001	All
CMC1_HUMAN	HP:0000001	All
CMC2_HUMAN	HP:0000001	All
CMTA1_HUMAN	HP:0000001	All
CNCG_HUMAN	HP:0000001	All
CNGA1_HUMAN	HP:0000001	All
CNGA3_HUMAN	HP:0000001	All
CNGB1_HUMAN	HP:0000001	All
CNGB3_HUMAN	HP:0000001	All
CNNM2_HUMAN	HP:0000001	All
CNNM4_HUMAN	HP:0000001	All
CNRG_HUMAN	HP:0000001	All
CNTN1_HUMAN	HP:0000001	All
CNTN2_HUMAN	HP:0000001	All
CNTP2_HUMAN	HP:0000001	All
CO2_HUMAN	HP:0000001	All
CO3_HUMAN	HP:0000001	All
CO4A1_HUMAN	HP:0000001	All
CO4A2_HUMAN	HP:0000001	All
CO4A4_HUMAN	HP:0000001	All
CO4A5_HUMAN	HP:0000001	All
CO5A1_HUMAN	HP:0000001	All
CO5_HUMAN	HP:0000001	All
CO6A1_HUMAN	HP:0000001	All
CO7A1_HUMAN	HP:0000001	All
CO7_HUMAN	HP:0000001	All
CO8A2_HUMAN	HP:0000001	All
CO8A_HUMAN	HP:0000001	All
CO8B_HUMAN	HP:0000001	All
CO9A2_HUMAN	HP:0000001	All
CO9A3_HUMAN	HP:0000001	All
COAA1_HUMAN	HP:0000001	All
COCH_HUMAN	HP:0000001	All
COF2_HUMAN	HP:0000001	All
COG1_HUMAN	HP:0000001	All
COG4_HUMAN	HP:0000001	All
COG5_HUMAN	HP:0000001	All
COG6_HUMAN	HP:0000001	All
COG7_HUMAN	HP:0000001	All
COG8_HUMAN	HP:0000001	All
COHA1_HUMAN	HP:0000001	All
COLI_HUMAN	HP:0000001	All
COMP_HUMAN	HP:0000001	All
COMT_HUMAN	HP:0000001	All
COQ2_HUMAN	HP:0000001	All
COQ6_HUMAN	HP:0000001	All
COQ9_HUMAN	HP:0000001	All
COR1A_HUMAN	HP:0000001	All
CORIN_HUMAN	HP:0000001	All
COX14_HUMAN	HP:0000001	All
COX15_HUMAN	HP:0000001	All
COX1_HUMAN	HP:0000001	All
COX3_HUMAN	HP:0000001	All
COX42_HUMAN	HP:0000001	All
COX7B_HUMAN	HP:0000001	All
CP11A_HUMAN	HP:0000001	All
CP135_HUMAN	HP:0000001	All
CP17A_HUMAN	HP:0000001	All
CP19A_HUMAN	HP:0000001	All
CP1A1_HUMAN	HP:0000001	All
CP1A2_HUMAN	HP:0000001	All
CP1B1_HUMAN	HP:0000001	All
CP24A_HUMAN	HP:0000001	All
CP26C_HUMAN	HP:0000001	All
CP27A_HUMAN	HP:0000001	All
CP2C9_HUMAN	HP:0000001	All
CP2CJ_HUMAN	HP:0000001	All
CP2R1_HUMAN	HP:0000001	All
CP2U1_HUMAN	HP:0000001	All
CP4FN_HUMAN	HP:0000001	All
CP4V2_HUMAN	HP:0000001	All
CP7B1_HUMAN	HP:0000001	All
CPSM_HUMAN	HP:0000001	All
CPT1A_HUMAN	HP:0000001	All
CPT2_HUMAN	HP:0000001	All
CR2_HUMAN	HP:0000001	All
CRBA1_HUMAN	HP:0000001	All
CRBA4_HUMAN	HP:0000001	All
CRBB2_HUMAN	HP:0000001	All
CRBB3_HUMAN	HP:0000001	All
CRBN_HUMAN	HP:0000001	All
CRCM1_HUMAN	HP:0000001	All
CRCM_HUMAN	HP:0000001	All
CRDL1_HUMAN	HP:0000001	All
CREB1_HUMAN	HP:0000001	All
CRF_HUMAN	HP:0000001	All
CRGB_HUMAN	HP:0000001	All
CRGC_HUMAN	HP:0000001	All
CRGD_HUMAN	HP:0000001	All
CRLF1_HUMAN	HP:0000001	All
CRTAP_HUMAN	HP:0000001	All
CRX_HUMAN	HP:0000001	All
CRYAA_HUMAN	HP:0000001	All
CRYAB_HUMAN	HP:0000001	All
CS012_HUMAN	HP:0000001	All
CSF1R_HUMAN	HP:0000001	All
CSPG2_HUMAN	HP:0000001	All
CSRP3_HUMAN	HP:0000001	All
CTC1_HUMAN	HP:0000001	All
CTCF_HUMAN	HP:0000001	All
CTDP1_HUMAN	HP:0000001	All
CTHR1_HUMAN	HP:0000001	All
CTNB1_HUMAN	HP:0000001	All
CTNS_HUMAN	HP:0000001	All
CTSR1_HUMAN	HP:0000001	All
CUBN_HUMAN	HP:0000001	All
CUL3_HUMAN	HP:0000001	All
CUL7_HUMAN	HP:0000001	All
CX6B1_HUMAN	HP:0000001	All
CXA1_HUMAN	HP:0000001	All
CXA3_HUMAN	HP:0000001	All
CXA5_HUMAN	HP:0000001	All
CXA8_HUMAN	HP:0000001	All
CXB1_HUMAN	HP:0000001	All
CXB3_HUMAN	HP:0000001	All
CXB4_HUMAN	HP:0000001	All
CXB6_HUMAN	HP:0000001	All
CXCR4_HUMAN	HP:0000001	All
CXG2_HUMAN	HP:0000001	All
CY1_HUMAN	HP:0000001	All
CY24A_HUMAN	HP:0000001	All
CY24B_HUMAN	HP:0000001	All
CYB5_HUMAN	HP:0000001	All
CYC_HUMAN	HP:0000001	All
CYLD_HUMAN	HP:0000001	All
CYTC_HUMAN	HP:0000001	All
CYTSA_HUMAN	HP:0000001	All
D19L2_HUMAN	HP:0000001	All
D2HDH_HUMAN	HP:0000001	All
DAAF1_HUMAN	HP:0000001	All
DAAF3_HUMAN	HP:0000001	All
DACT1_HUMAN	HP:0000001	All
DAG1_HUMAN	HP:0000001	All
DAPLE_HUMAN	HP:0000001	All
DBLOH_HUMAN	HP:0000001	All
DCA17_HUMAN	HP:0000001	All
DCE1_HUMAN	HP:0000001	All
DCK_HUMAN	HP:0000001	All
DCMC_HUMAN	HP:0000001	All
DCUP_HUMAN	HP:0000001	All
DCXR_HUMAN	HP:0000001	All
DCX_HUMAN	HP:0000001	All
DDB1_HUMAN	HP:0000001	All
DDB2_HUMAN	HP:0000001	All
DDC_HUMAN	HP:0000001	All
DDHD1_HUMAN	HP:0000001	All
DDHD2_HUMAN	HP:0000001	All
DDIT3_HUMAN	HP:0000001	All
DDR2_HUMAN	HP:0000001	All
DDX11_HUMAN	HP:0000001	All
DDX59_HUMAN	HP:0000001	All
DECR_HUMAN	HP:0000001	All
DESP_HUMAN	HP:0000001	All
DGKE_HUMAN	HP:0000001	All
DGUOK_HUMAN	HP:0000001	All
DHB4_HUMAN	HP:0000001	All
DHC24_HUMAN	HP:0000001	All
DHCR7_HUMAN	HP:0000001	All
DHE3_HUMAN	HP:0000001	All
DHH_HUMAN	HP:0000001	All
DHI1_HUMAN	HP:0000001	All
DHPR_HUMAN	HP:0000001	All
DHSD_HUMAN	HP:0000001	All
DHTK1_HUMAN	HP:0000001	All
DI3L2_HUMAN	HP:0000001	All
DIAP1_HUMAN	HP:0000001	All
DIAP2_HUMAN	HP:0000001	All
DICER_HUMAN	HP:0000001	All
DIP2B_HUMAN	HP:0000001	All
DIRC2_HUMAN	HP:0000001	All
DKC1_HUMAN	HP:0000001	All
DKK1_HUMAN	HP:0000001	All
DLDH_HUMAN	HP:0000001	All
DLEC1_HUMAN	HP:0000001	All
DLG3_HUMAN	HP:0000001	All
DLL3_HUMAN	HP:0000001	All
DLP1_HUMAN	HP:0000001	All
DLX3_HUMAN	HP:0000001	All
DLX5_HUMAN	HP:0000001	All
DMP1_HUMAN	HP:0000001	All
DMPK_HUMAN	HP:0000001	All
DMRT1_HUMAN	HP:0000001	All
DMRT2_HUMAN	HP:0000001	All
DNA2_HUMAN	HP:0000001	All
DNAI1_HUMAN	HP:0000001	All
DNAI2_HUMAN	HP:0000001	All
DNAL1_HUMAN	HP:0000001	All
DNJB2_HUMAN	HP:0000001	All
DNJC5_HUMAN	HP:0000001	All
DNLI4_HUMAN	HP:0000001	All
DNMT1_HUMAN	HP:0000001	All
DNSL3_HUMAN	HP:0000001	All
DOCK6_HUMAN	HP:0000001	All
DOK7_HUMAN	HP:0000001	All
DOLK_HUMAN	HP:0000001	All
DOPO_HUMAN	HP:0000001	All
DOXA2_HUMAN	HP:0000001	All
DPEP1_HUMAN	HP:0000001	All
DPM1_HUMAN	HP:0000001	All
DPM2_HUMAN	HP:0000001	All
DPM3_HUMAN	HP:0000001	All
DPOE1_HUMAN	HP:0000001	All
DPOG1_HUMAN	HP:0000001	All
DPOG2_HUMAN	HP:0000001	All
DPOLA_HUMAN	HP:0000001	All
DPS1_HUMAN	HP:0000001	All
DRA_HUMAN	HP:0000001	All
DRC1_HUMAN	HP:0000001	All
DRD2_HUMAN	HP:0000001	All
DSC3_HUMAN	HP:0000001	All
DSE_HUMAN	HP:0000001	All
DSG2_HUMAN	HP:0000001	All
DSG4_HUMAN	HP:0000001	All
DSPP_HUMAN	HP:0000001	All
DTBP1_HUMAN	HP:0000001	All
DUOX2_HUMAN	HP:0000001	All
DUS6_HUMAN	HP:0000001	All
DYH11_HUMAN	HP:0000001	All
DYH5_HUMAN	HP:0000001	All
DYHC1_HUMAN	HP:0000001	All
DYN2_HUMAN	HP:0000001	All
DYR1A_HUMAN	HP:0000001	All
DYR_HUMAN	HP:0000001	All
E2AK3_HUMAN	HP:0000001	All
EAA1_HUMAN	HP:0000001	All
EBP_HUMAN	HP:0000001	All
ECEL1_HUMAN	HP:0000001	All
ECHA_HUMAN	HP:0000001	All
ECHB_HUMAN	HP:0000001	All
EDAD_HUMAN	HP:0000001	All
EDAR_HUMAN	HP:0000001	All
EDN3_HUMAN	HP:0000001	All
EF2_HUMAN	HP:0000001	All
EFGM_HUMAN	HP:0000001	All
EFNB1_HUMAN	HP:0000001	All
EFTS_HUMAN	HP:0000001	All
EFTU_HUMAN	HP:0000001	All
EGF_HUMAN	HP:0000001	All
EGLN1_HUMAN	HP:0000001	All
EGLN_HUMAN	HP:0000001	All
EGR2_HUMAN	HP:0000001	All
EHMT1_HUMAN	HP:0000001	All
EI2BA_HUMAN	HP:0000001	All
EI2BB_HUMAN	HP:0000001	All
EI2BD_HUMAN	HP:0000001	All
EI2BE_HUMAN	HP:0000001	All
EI2BG_HUMAN	HP:0000001	All
ELAF_HUMAN	HP:0000001	All
ELK1_HUMAN	HP:0000001	All
ELNE_HUMAN	HP:0000001	All
ELOV4_HUMAN	HP:0000001	All
ELP1_HUMAN	HP:0000001	All
EMD_HUMAN	HP:0000001	All
EMX2_HUMAN	HP:0000001	All
ENAM_HUMAN	HP:0000001	All
ENL_HUMAN	HP:0000001	All
ENOB_HUMAN	HP:0000001	All
ENPP1_HUMAN	HP:0000001	All
ENTK_HUMAN	HP:0000001	All
EOGT_HUMAN	HP:0000001	All
EP300_HUMAN	HP:0000001	All
EPAS1_HUMAN	HP:0000001	All
EPB42_HUMAN	HP:0000001	All
EPCAM_HUMAN	HP:0000001	All
EPG5_HUMAN	HP:0000001	All
EPHA2_HUMAN	HP:0000001	All
EPHB2_HUMAN	HP:0000001	All
ERBB2_HUMAN	HP:0000001	All
ERBB3_HUMAN	HP:0000001	All
ERCC1_HUMAN	HP:0000001	All
ERCC2_HUMAN	HP:0000001	All
ERCC3_HUMAN	HP:0000001	All
ERCC5_HUMAN	HP:0000001	All
ERCC6_HUMAN	HP:0000001	All
ERCC8_HUMAN	HP:0000001	All
ERF_HUMAN	HP:0000001	All
ERLN2_HUMAN	HP:0000001	All
ERR2_HUMAN	HP:0000001	All
ES8L3_HUMAN	HP:0000001	All
ESCO2_HUMAN	HP:0000001	All
ESPN_HUMAN	HP:0000001	All
ETFA_HUMAN	HP:0000001	All
ETFB_HUMAN	HP:0000001	All
ETFD_HUMAN	HP:0000001	All
ETHE1_HUMAN	HP:0000001	All
ETV6_HUMAN	HP:0000001	All
EWS_HUMAN	HP:0000001	All
EXOS3_HUMAN	HP:0000001	All
EXT1_HUMAN	HP:0000001	All
EXT2_HUMAN	HP:0000001	All
EYA1_HUMAN	HP:0000001	All
EYA4_HUMAN	HP:0000001	All
F111A_HUMAN	HP:0000001	All
F13A_HUMAN	HP:0000001	All
F13B_HUMAN	HP:0000001	All
F161A_HUMAN	HP:0000001	All
F16P1_HUMAN	HP:0000001	All
F261_HUMAN	HP:0000001	All
FA10_HUMAN	HP:0000001	All
FA11_HUMAN	HP:0000001	All
FA12_HUMAN	HP:0000001	All
FA20A_HUMAN	HP:0000001	All
FA2H_HUMAN	HP:0000001	All
FA5_HUMAN	HP:0000001	All
FA7_HUMAN	HP:0000001	All
FA83H_HUMAN	HP:0000001	All
FA8_HUMAN	HP:0000001	All
FA9_HUMAN	HP:0000001	All
FAAA_HUMAN	HP:0000001	All
FACD2_HUMAN	HP:0000001	All
FACE1_HUMAN	HP:0000001	All
FADD_HUMAN	HP:0000001	All
FAKD2_HUMAN	HP:0000001	All
FAN1_HUMAN	HP:0000001	All
FANCB_HUMAN	HP:0000001	All
FANCC_HUMAN	HP:0000001	All
FANCE_HUMAN	HP:0000001	All
FANCF_HUMAN	HP:0000001	All
FANCI_HUMAN	HP:0000001	All
FANCJ_HUMAN	HP:0000001	All
FANCL_HUMAN	HP:0000001	All
FANCM_HUMAN	HP:0000001	All
FBLN3_HUMAN	HP:0000001	All
FBLN4_HUMAN	HP:0000001	All
FBLN5_HUMAN	HP:0000001	All
FBN1_HUMAN	HP:0000001	All
FBN2_HUMAN	HP:0000001	All
FBW1A_HUMAN	HP:0000001	All
FBX7_HUMAN	HP:0000001	All
FBXL4_HUMAN	HP:0000001	All
FBXW4_HUMAN	HP:0000001	All
FCN3_HUMAN	HP:0000001	All
FERM1_HUMAN	HP:0000001	All
FETA_HUMAN	HP:0000001	All
FGD1_HUMAN	HP:0000001	All
FGD4_HUMAN	HP:0000001	All
FGF10_HUMAN	HP:0000001	All
FGF14_HUMAN	HP:0000001	All
FGF17_HUMAN	HP:0000001	All
FGF23_HUMAN	HP:0000001	All
FGF3_HUMAN	HP:0000001	All
FGF8_HUMAN	HP:0000001	All
FGF9_HUMAN	HP:0000001	All
FGFR3_HUMAN	HP:0000001	All
FHL2_HUMAN	HP:0000001	All
FHR5_HUMAN	HP:0000001	All
FIBA_HUMAN	HP:0000001	All
FIBB_HUMAN	HP:0000001	All
FIG4_HUMAN	HP:0000001	All
FILA_HUMAN	HP:0000001	All
FKB10_HUMAN	HP:0000001	All
FKRP_HUMAN	HP:0000001	All
FKTN_HUMAN	HP:0000001	All
FLCN_HUMAN	HP:0000001	All
FLNA_HUMAN	HP:0000001	All
FLNC_HUMAN	HP:0000001	All
FLRT3_HUMAN	HP:0000001	All
FLT3_HUMAN	HP:0000001	All
FLVC1_HUMAN	HP:0000001	All
FLVC2_HUMAN	HP:0000001	All
FMO3_HUMAN	HP:0000001	All
FMR1_HUMAN	HP:0000001	All
FOG2_HUMAN	HP:0000001	All
FOLR1_HUMAN	HP:0000001	All
FOS_HUMAN	HP:0000001	All
FOXC1_HUMAN	HP:0000001	All
FOXC2_HUMAN	HP:0000001	All
FOXE1_HUMAN	HP:0000001	All
FOXE3_HUMAN	HP:0000001	All
FOXF1_HUMAN	HP:0000001	All
FOXG1_HUMAN	HP:0000001	All
FOXI1_HUMAN	HP:0000001	All
FOXL2_HUMAN	HP:0000001	All
FOXN1_HUMAN	HP:0000001	All
FOXO1_HUMAN	HP:0000001	All
FOXO4_HUMAN	HP:0000001	All
FOXP3_HUMAN	HP:0000001	All
FRAS1_HUMAN	HP:0000001	All
FRDA_HUMAN	HP:0000001	All
FREM1_HUMAN	HP:0000001	All
FREM2_HUMAN	HP:0000001	All
FRG1_HUMAN	HP:0000001	All
FRITZ_HUMAN	HP:0000001	All
FRMD7_HUMAN	HP:0000001	All
FSBP_HUMAN	HP:0000001	All
FSCN2_HUMAN	HP:0000001	All
FSHB_HUMAN	HP:0000001	All
FTCD_HUMAN	HP:0000001	All
FTM_HUMAN	HP:0000001	All
FTO_HUMAN	HP:0000001	All
FUCO2_HUMAN	HP:0000001	All
FUCO_HUMAN	HP:0000001	All
FUCT1_HUMAN	HP:0000001	All
FUS_HUMAN	HP:0000001	All
FUT1_HUMAN	HP:0000001	All
FUZZY_HUMAN	HP:0000001	All
FXRD1_HUMAN	HP:0000001	All
FYCO1_HUMAN	HP:0000001	All
FYV1_HUMAN	HP:0000001	All
FZD4_HUMAN	HP:0000001	All
FZD6_HUMAN	HP:0000001	All
G6PC3_HUMAN	HP:0000001	All
G6PD_HUMAN	HP:0000001	All
G6PE_HUMAN	HP:0000001	All
G6PI_HUMAN	HP:0000001	All
G6PT1_HUMAN	HP:0000001	All
GABT_HUMAN	HP:0000001	All
GALC_HUMAN	HP:0000001	All
GALE_HUMAN	HP:0000001	All
GALK1_HUMAN	HP:0000001	All
GALNS_HUMAN	HP:0000001	All
GALT3_HUMAN	HP:0000001	All
GAMT_HUMAN	HP:0000001	All
GATA1_HUMAN	HP:0000001	All
GATA2_HUMAN	HP:0000001	All
GATA3_HUMAN	HP:0000001	All
GATA4_HUMAN	HP:0000001	All
GATA6_HUMAN	HP:0000001	All
GATD1_HUMAN	HP:0000001	All
GATM_HUMAN	HP:0000001	All
GBA2_HUMAN	HP:0000001	All
GBB4_HUMAN	HP:0000001	All
GBRA3_HUMAN	HP:0000001	All
GBRB3_HUMAN	HP:0000001	All
GBRG2_HUMAN	HP:0000001	All
GCDH_HUMAN	HP:0000001	All
GCH1_HUMAN	HP:0000001	All
GCM2_HUMAN	HP:0000001	All
GCP6_HUMAN	HP:0000001	All
GCR_HUMAN	HP:0000001	All
GCSH_HUMAN	HP:0000001	All
GCSP_HUMAN	HP:0000001	All
GCST_HUMAN	HP:0000001	All
GDF1_HUMAN	HP:0000001	All
GDF2_HUMAN	HP:0000001	All
GDF3_HUMAN	HP:0000001	All
GDF5_HUMAN	HP:0000001	All
GDF6_HUMAN	HP:0000001	All
GDF8_HUMAN	HP:0000001	All
GDIA_HUMAN	HP:0000001	All
GDIR1_HUMAN	HP:0000001	All
GELS_HUMAN	HP:0000001	All
GEPH_HUMAN	HP:0000001	All
GFI1_HUMAN	HP:0000001	All
GFPT1_HUMAN	HP:0000001	All
GHRHR_HUMAN	HP:0000001	All
GHR_HUMAN	HP:0000001	All
GHSR_HUMAN	HP:0000001	All
GIPC3_HUMAN	HP:0000001	All
GIP_HUMAN	HP:0000001	All
GLCM_HUMAN	HP:0000001	All
GLCTK_HUMAN	HP:0000001	All
GLE1_HUMAN	HP:0000001	All
GLGB_HUMAN	HP:0000001	All
GLI2_HUMAN	HP:0000001	All
GLI3_HUMAN	HP:0000001	All
GLIS2_HUMAN	HP:0000001	All
GLIS3_HUMAN	HP:0000001	All
GLMN_HUMAN	HP:0000001	All
GLNA_HUMAN	HP:0000001	All
GLPK_HUMAN	HP:0000001	All
GLRA1_HUMAN	HP:0000001	All
GLRB_HUMAN	HP:0000001	All
GLRX5_HUMAN	HP:0000001	All
GLTL5_HUMAN	HP:0000001	All
GLU2B_HUMAN	HP:0000001	All
GLYG_HUMAN	HP:0000001	All
GMPPB_HUMAN	HP:0000001	All
GNA11_HUMAN	HP:0000001	All
GNAI2_HUMAN	HP:0000001	All
GNAI3_HUMAN	HP:0000001	All
GNAL_HUMAN	HP:0000001	All
GNAO_HUMAN	HP:0000001	All
GNAQ_HUMAN	HP:0000001	All
GNAS1_HUMAN	HP:0000001	All
GNAT1_HUMAN	HP:0000001	All
GNMT_HUMAN	HP:0000001	All
GNPAT_HUMAN	HP:0000001	All
GNPTA_HUMAN	HP:0000001	All
GNPTG_HUMAN	HP:0000001	All
GNRHR_HUMAN	HP:0000001	All
GNS_HUMAN	HP:0000001	All
GOGA5_HUMAN	HP:0000001	All
GON1_HUMAN	HP:0000001	All
GOPC_HUMAN	HP:0000001	All
GORAB_HUMAN	HP:0000001	All
GOSR2_HUMAN	HP:0000001	All
GP143_HUMAN	HP:0000001	All
GP1BA_HUMAN	HP:0000001	All
GP1BB_HUMAN	HP:0000001	All
GPC3_HUMAN	HP:0000001	All
GPC6_HUMAN	HP:0000001	All
GPD1L_HUMAN	HP:0000001	All
GPDA_HUMAN	HP:0000001	All
GPIX_HUMAN	HP:0000001	All
GPSM2_HUMAN	HP:0000001	All
GPT_HUMAN	HP:0000001	All
GPVI_HUMAN	HP:0000001	All
GRHL2_HUMAN	HP:0000001	All
GRHPR_HUMAN	HP:0000001	All
GRIA3_HUMAN	HP:0000001	All
GRIP1_HUMAN	HP:0000001	All
GRPR_HUMAN	HP:0000001	All
GSH1_HUMAN	HP:0000001	All
GSHB_HUMAN	HP:0000001	All
GSHR_HUMAN	HP:0000001	All
GTR10_HUMAN	HP:0000001	All
GTR1_HUMAN	HP:0000001	All
GTR2_HUMAN	HP:0000001	All
GTR9_HUMAN	HP:0000001	All
GUC1A_HUMAN	HP:0000001	All
GUC1B_HUMAN	HP:0000001	All
GUC2C_HUMAN	HP:0000001	All
GUC2D_HUMAN	HP:0000001	All
GWL_HUMAN	HP:0000001	All
GYS1_HUMAN	HP:0000001	All
GYS2_HUMAN	HP:0000001	All
H6ST1_HUMAN	HP:0000001	All
HAIR_HUMAN	HP:0000001	All
HAX1_HUMAN	HP:0000001	All
HBAT_HUMAN	HP:0000001	All
HBAZ_HUMAN	HP:0000001	All
HBD_HUMAN	HP:0000001	All
HBEGF_HUMAN	HP:0000001	All
HBE_HUMAN	HP:0000001	All
HBG2_HUMAN	HP:0000001	All
HCD2_HUMAN	HP:0000001	All
HCDH_HUMAN	HP:0000001	All
HCFC1_HUMAN	HP:0000001	All
HCN4_HUMAN	HP:0000001	All
HDAC4_HUMAN	HP:0000001	All
HDAC6_HUMAN	HP:0000001	All
HD_HUMAN	HP:0000001	All
HECAM_HUMAN	HP:0000001	All
HEM0_HUMAN	HP:0000001	All
HEM2_HUMAN	HP:0000001	All
HEM3_HUMAN	HP:0000001	All
HEM4_HUMAN	HP:0000001	All
HEM6_HUMAN	HP:0000001	All
HEMH_HUMAN	HP:0000001	All
HEP2_HUMAN	HP:0000001	All
HEPC_HUMAN	HP:0000001	All
HES7_HUMAN	HP:0000001	All
HESX1_HUMAN	HP:0000001	All
HEXA_HUMAN	HP:0000001	All
HGD_HUMAN	HP:0000001	All
HGNAT_HUMAN	HP:0000001	All
HIBCH_HUMAN	HP:0000001	All
HINT1_HUMAN	HP:0000001	All
HIRA_HUMAN	HP:0000001	All
HMCS2_HUMAN	HP:0000001	All
HMGA1_HUMAN	HP:0000001	All
HMGA2_HUMAN	HP:0000001	All
HMGCL_HUMAN	HP:0000001	All
HNF1A_HUMAN	HP:0000001	All
HNF1B_HUMAN	HP:0000001	All
HOGA1_HUMAN	HP:0000001	All
HOP2_HUMAN	HP:0000001	All
HPPD_HUMAN	HP:0000001	All
HPRT_HUMAN	HP:0000001	All
HPS1_HUMAN	HP:0000001	All
HPS3_HUMAN	HP:0000001	All
HPS4_HUMAN	HP:0000001	All
HPS5_HUMAN	HP:0000001	All
HPS6_HUMAN	HP:0000001	All
HPSE2_HUMAN	HP:0000001	All
HRG_HUMAN	HP:0000001	All
HSF4_HUMAN	HP:0000001	All
HSPB8_HUMAN	HP:0000001	All
HTF4_HUMAN	HP:0000001	All
HTRA1_HUMAN	HP:0000001	All
HTRA2_HUMAN	HP:0000001	All
HUTU_HUMAN	HP:0000001	All
HXA11_HUMAN	HP:0000001	All
HXA13_HUMAN	HP:0000001	All
HXA1_HUMAN	HP:0000001	All
HXA2_HUMAN	HP:0000001	All
HXC13_HUMAN	HP:0000001	All
HXD10_HUMAN	HP:0000001	All
HXK4_HUMAN	HP:0000001	All
HYCCI_HUMAN	HP:0000001	All
HYLS1_HUMAN	HP:0000001	All
I10R1_HUMAN	HP:0000001	All
I10R2_HUMAN	HP:0000001	All
I11RA_HUMAN	HP:0000001	All
I17RA_HUMAN	HP:0000001	All
I17RD_HUMAN	HP:0000001	All
I36RA_HUMAN	HP:0000001	All
IBP7_HUMAN	HP:0000001	All
ICAM1_HUMAN	HP:0000001	All
ICOS_HUMAN	HP:0000001	All
IDHP_HUMAN	HP:0000001	All
IDS_HUMAN	HP:0000001	All
IF122_HUMAN	HP:0000001	All
IF140_HUMAN	HP:0000001	All
IF172_HUMAN	HP:0000001	All
IFT80_HUMAN	HP:0000001	All
IFT88_HUMAN	HP:0000001	All
IF_HUMAN	HP:0000001	All
IGBP1_HUMAN	HP:0000001	All
IGF1R_HUMAN	HP:0000001	All
IGF1_HUMAN	HP:0000001	All
IGLL1_HUMAN	HP:0000001	All
IGSF1_HUMAN	HP:0000001	All
IHH_HUMAN	HP:0000001	All
IKBA_HUMAN	HP:0000001	All
IKKA_HUMAN	HP:0000001	All
IL17F_HUMAN	HP:0000001	All
IL1RA_HUMAN	HP:0000001	All
IL21R_HUMAN	HP:0000001	All
IL2RA_HUMAN	HP:0000001	All
IL2RB_HUMAN	HP:0000001	All
IL2RG_HUMAN	HP:0000001	All
IL3RA_HUMAN	HP:0000001	All
IL3RB_HUMAN	HP:0000001	All
ILDR1_HUMAN	HP:0000001	All
IMPA3_HUMAN	HP:0000001	All
IMPG2_HUMAN	HP:0000001	All
INF2_HUMAN	HP:0000001	All
INGR1_HUMAN	HP:0000001	All
INGR2_HUMAN	HP:0000001	All
INP5E_HUMAN	HP:0000001	All
INSL3_HUMAN	HP:0000001	All
INSR_HUMAN	HP:0000001	All
INS_HUMAN	HP:0000001	All
INVS_HUMAN	HP:0000001	All
IQCB1_HUMAN	HP:0000001	All
IQEC2_HUMAN	HP:0000001	All
IRAK4_HUMAN	HP:0000001	All
IRF1_HUMAN	HP:0000001	All
IRF4_HUMAN	HP:0000001	All
IRF6_HUMAN	HP:0000001	All
IRF8_HUMAN	HP:0000001	All
IRGM_HUMAN	HP:0000001	All
IRPL1_HUMAN	HP:0000001	All
IRX5_HUMAN	HP:0000001	All
ISCU_HUMAN	HP:0000001	All
ISPD_HUMAN	HP:0000001	All
ITA2B_HUMAN	HP:0000001	All
ITA2_HUMAN	HP:0000001	All
ITA3_HUMAN	HP:0000001	All
ITAM_HUMAN	HP:0000001	All
ITB2_HUMAN	HP:0000001	All
ITB3_HUMAN	HP:0000001	All
ITB4_HUMAN	HP:0000001	All
ITK_HUMAN	HP:0000001	All
ITM2B_HUMAN	HP:0000001	All
ITPR1_HUMAN	HP:0000001	All
IVD_HUMAN	HP:0000001	All
JAG1_HUMAN	HP:0000001	All
JAK2_HUMAN	HP:0000001	All
JAK3_HUMAN	HP:0000001	All
JAM3_HUMAN	HP:0000001	All
JIP3_HUMAN	HP:0000001	All
JPH2_HUMAN	HP:0000001	All
JPH3_HUMAN	HP:0000001	All
K1C10_HUMAN	HP:0000001	All
K1C12_HUMAN	HP:0000001	All
K1C13_HUMAN	HP:0000001	All
K1C14_HUMAN	HP:0000001	All
K1C16_HUMAN	HP:0000001	All
K1C18_HUMAN	HP:0000001	All
K1C9_HUMAN	HP:0000001	All
K22E_HUMAN	HP:0000001	All
K2C1_HUMAN	HP:0000001	All
K2C3_HUMAN	HP:0000001	All
K2C5_HUMAN	HP:0000001	All
K2C6A_HUMAN	HP:0000001	All
K2C6B_HUMAN	HP:0000001	All
K2C71_HUMAN	HP:0000001	All
K2C74_HUMAN	HP:0000001	All
KAD1_HUMAN	HP:0000001	All
KALM_HUMAN	HP:0000001	All
KANK1_HUMAN	HP:0000001	All
KANL1_HUMAN	HP:0000001	All
KAP0_HUMAN	HP:0000001	All
KAT6B_HUMAN	HP:0000001	All
KBP_HUMAN	HP:0000001	All
KC1D_HUMAN	HP:0000001	All
KCNA1_HUMAN	HP:0000001	All
KCNA5_HUMAN	HP:0000001	All
KCND3_HUMAN	HP:0000001	All
KCNE1_HUMAN	HP:0000001	All
KCNE2_HUMAN	HP:0000001	All
KCNK9_HUMAN	HP:0000001	All
KCNQ1_HUMAN	HP:0000001	All
KCNQ3_HUMAN	HP:0000001	All
KCNQ4_HUMAN	HP:0000001	All
KCNT1_HUMAN	HP:0000001	All
KCNV2_HUMAN	HP:0000001	All
KCTD1_HUMAN	HP:0000001	All
KCTD7_HUMAN	HP:0000001	All
KDM5C_HUMAN	HP:0000001	All
KDM6A_HUMAN	HP:0000001	All
KGP1_HUMAN	HP:0000001	All
KIF11_HUMAN	HP:0000001	All
KIF22_HUMAN	HP:0000001	All
KIF2A_HUMAN	HP:0000001	All
KIF5A_HUMAN	HP:0000001	All
KIF5C_HUMAN	HP:0000001	All
KIF7_HUMAN	HP:0000001	All
KIRR3_HUMAN	HP:0000001	All
KISS1_HUMAN	HP:0000001	All
KISSR_HUMAN	HP:0000001	All
KITM_HUMAN	HP:0000001	All
KIT_HUMAN	HP:0000001	All
KLF11_HUMAN	HP:0000001	All
KLF1_HUMAN	HP:0000001	All
KLF6_HUMAN	HP:0000001	All
KLH10_HUMAN	HP:0000001	All
KLHL3_HUMAN	HP:0000001	All
KLHL7_HUMAN	HP:0000001	All
KLK4_HUMAN	HP:0000001	All
KLKB1_HUMAN	HP:0000001	All
KLOT_HUMAN	HP:0000001	All
KMT2D_HUMAN	HP:0000001	All
KPB1_HUMAN	HP:0000001	All
KPB2_HUMAN	HP:0000001	All
KPBB_HUMAN	HP:0000001	All
KPCA_HUMAN	HP:0000001	All
KPCD_HUMAN	HP:0000001	All
KPYR_HUMAN	HP:0000001	All
KRT81_HUMAN	HP:0000001	All
KRT83_HUMAN	HP:0000001	All
KRT85_HUMAN	HP:0000001	All
KRT86_HUMAN	HP:0000001	All
KS6A3_HUMAN	HP:0000001	All
KTU_HUMAN	HP:0000001	All
L1CAM_HUMAN	HP:0000001	All
L2HDH_HUMAN	HP:0000001	All
LAMA2_HUMAN	HP:0000001	All
LAMA3_HUMAN	HP:0000001	All
LAMB1_HUMAN	HP:0000001	All
LAMB2_HUMAN	HP:0000001	All
LAMB3_HUMAN	HP:0000001	All
LAMC2_HUMAN	HP:0000001	All
LAMC3_HUMAN	HP:0000001	All
LAMP2_HUMAN	HP:0000001	All
LAP2A_HUMAN	HP:0000001	All
LARP7_HUMAN	HP:0000001	All
LBN_HUMAN	HP:0000001	All
LBR_HUMAN	HP:0000001	All
LCA5_HUMAN	HP:0000001	All
LCAT_HUMAN	HP:0000001	All
LEPR_HUMAN	HP:0000001	All
LEP_HUMAN	HP:0000001	All
LFNG_HUMAN	HP:0000001	All
LGI1_HUMAN	HP:0000001	All
LHX3_HUMAN	HP:0000001	All
LHX4_HUMAN	HP:0000001	All
LIAS_HUMAN	HP:0000001	All
LICH_HUMAN	HP:0000001	All
LIFR_HUMAN	HP:0000001	All
LIPC_HUMAN	HP:0000001	All
LIPH_HUMAN	HP:0000001	All
LIPL_HUMAN	HP:0000001	All
LIPN_HUMAN	HP:0000001	All
LIPP_HUMAN	HP:0000001	All
LIS1_HUMAN	HP:0000001	All
LITAF_HUMAN	HP:0000001	All
LMBD1_HUMAN	HP:0000001	All
LMBR1_HUMAN	HP:0000001	All
LMF1_HUMAN	HP:0000001	All
LMNB1_HUMAN	HP:0000001	All
LMX1B_HUMAN	HP:0000001	All
LN28B_HUMAN	HP:0000001	All
LORI_HUMAN	HP:0000001	All
LOXE3_HUMAN	HP:0000001	All
LOXH1_HUMAN	HP:0000001	All
LPH_HUMAN	HP:0000001	All
LPIN1_HUMAN	HP:0000001	All
LPIN2_HUMAN	HP:0000001	All
LPPRC_HUMAN	HP:0000001	All
LPP_HUMAN	HP:0000001	All
LRAT_HUMAN	HP:0000001	All
LRBA_HUMAN	HP:0000001	All
LRC8A_HUMAN	HP:0000001	All
LRIG2_HUMAN	HP:0000001	All
LRIT3_HUMAN	HP:0000001	All
LRP2_HUMAN	HP:0000001	All
LRP4_HUMAN	HP:0000001	All
LRP5_HUMAN	HP:0000001	All
LRRK2_HUMAN	HP:0000001	All
LRSM1_HUMAN	HP:0000001	All
LSHB_HUMAN	HP:0000001	All
LSHR_HUMAN	HP:0000001	All
LTBP2_HUMAN	HP:0000001	All
LTBP3_HUMAN	HP:0000001	All
LTBP4_HUMAN	HP:0000001	All
LTC4S_HUMAN	HP:0000001	All
LTOR2_HUMAN	HP:0000001	All
LYAG_HUMAN	HP:0000001	All
LYL1_HUMAN	HP:0000001	All
LYSC_HUMAN	HP:0000001	All
LYST_HUMAN	HP:0000001	All
LZTS1_HUMAN	HP:0000001	All
M2GD_HUMAN	HP:0000001	All
M3K8_HUMAN	HP:0000001	All
MA1B1_HUMAN	HP:0000001	All
MA2B1_HUMAN	HP:0000001	All
MAFB_HUMAN	HP:0000001	All
MAF_HUMAN	HP:0000001	All
MAGT1_HUMAN	HP:0000001	All
MAK_HUMAN	HP:0000001	All
MALD2_HUMAN	HP:0000001	All
MALT1_HUMAN	HP:0000001	All
MAMD1_HUMAN	HP:0000001	All
MAN1_HUMAN	HP:0000001	All
MANBA_HUMAN	HP:0000001	All
MATN3_HUMAN	HP:0000001	All
MATR3_HUMAN	HP:0000001	All
MBD5_HUMAN	HP:0000001	All
MBTP2_HUMAN	HP:0000001	All
MC4R_HUMAN	HP:0000001	All
MCAT_HUMAN	HP:0000001	All
MCCA_HUMAN	HP:0000001	All
MCCB_HUMAN	HP:0000001	All
MCEE_HUMAN	HP:0000001	All
MCFD2_HUMAN	HP:0000001	All
MCLN1_HUMAN	HP:0000001	All
MCM4_HUMAN	HP:0000001	All
MCM6_HUMAN	HP:0000001	All
MCPH1_HUMAN	HP:0000001	All
MCR_HUMAN	HP:0000001	All
MD13L_HUMAN	HP:0000001	All
MD1L1_HUMAN	HP:0000001	All
MDR1_HUMAN	HP:0000001	All
MDR3_HUMAN	HP:0000001	All
MECP2_HUMAN	HP:0000001	All
MED12_HUMAN	HP:0000001	All
MED17_HUMAN	HP:0000001	All
MEF2C_HUMAN	HP:0000001	All
MEFV_HUMAN	HP:0000001	All
MEG10_HUMAN	HP:0000001	All
MEGF8_HUMAN	HP:0000001	All
MELPH_HUMAN	HP:0000001	All
MEOX1_HUMAN	HP:0000001	All
MERTK_HUMAN	HP:0000001	All
MESP2_HUMAN	HP:0000001	All
METH_HUMAN	HP:0000001	All
METK1_HUMAN	HP:0000001	All
MET_HUMAN	HP:0000001	All
MFN2_HUMAN	HP:0000001	All
MFRP_HUMAN	HP:0000001	All
MFSD8_HUMAN	HP:0000001	All
MGAT2_HUMAN	HP:0000001	All
MGME1_HUMAN	HP:0000001	All
MIF_HUMAN	HP:0000001	All
MINP1_HUMAN	HP:0000001	All
MIPO1_HUMAN	HP:0000001	All
MIS_HUMAN	HP:0000001	All
MKKS_HUMAN	HP:0000001	All
MKS1_HUMAN	HP:0000001	All
MKS3_HUMAN	HP:0000001	All
MLC1_HUMAN	HP:0000001	All
MLF1_HUMAN	HP:0000001	All
MLH1_HUMAN	HP:0000001	All
MLH3_HUMAN	HP:0000001	All
MLRV_HUMAN	HP:0000001	All
MMAA_HUMAN	HP:0000001	All
MMAB_HUMAN	HP:0000001	All
MMAC_HUMAN	HP:0000001	All
MMAD_HUMAN	HP:0000001	All
MMP14_HUMAN	HP:0000001	All
MMP1_HUMAN	HP:0000001	All
MMP20_HUMAN	HP:0000001	All
MMP2_HUMAN	HP:0000001	All
MMP9_HUMAN	HP:0000001	All
MN1_HUMAN	HP:0000001	All
MNX1_HUMAN	HP:0000001	All
MOGS_HUMAN	HP:0000001	All
MOT12_HUMAN	HP:0000001	All
MOT1_HUMAN	HP:0000001	All
MOT8_HUMAN	HP:0000001	All
MPC1_HUMAN	HP:0000001	All
MPCP_HUMAN	HP:0000001	All
MPI_HUMAN	HP:0000001	All
MPRI_HUMAN	HP:0000001	All
MPU1_HUMAN	HP:0000001	All
MPV17_HUMAN	HP:0000001	All
MRAP_HUMAN	HP:0000001	All
MRE11_HUMAN	HP:0000001	All
MRP2_HUMAN	HP:0000001	All
MRP6_HUMAN	HP:0000001	All
MSH2_HUMAN	HP:0000001	All
MSH6_HUMAN	HP:0000001	All
MSRB3_HUMAN	HP:0000001	All
MSRE_HUMAN	HP:0000001	All
MSX1_HUMAN	HP:0000001	All
MSX2_HUMAN	HP:0000001	All
MTHR_HUMAN	HP:0000001	All
MTM1_HUMAN	HP:0000001	All
MTMR2_HUMAN	HP:0000001	All
MTMR5_HUMAN	HP:0000001	All
MTP_HUMAN	HP:0000001	All
MTRR_HUMAN	HP:0000001	All
MTU1_HUMAN	HP:0000001	All
MUSK_HUMAN	HP:0000001	All
MUTA_HUMAN	HP:0000001	All
MUTYH_HUMAN	HP:0000001	All
MYCN_HUMAN	HP:0000001	All
MYC_HUMAN	HP:0000001	All
MYD88_HUMAN	HP:0000001	All
MYF6_HUMAN	HP:0000001	All
MYH11_HUMAN	HP:0000001	All
MYH2_HUMAN	HP:0000001	All
MYH3_HUMAN	HP:0000001	All
MYH6_HUMAN	HP:0000001	All
MYH8_HUMAN	HP:0000001	All
MYH9_HUMAN	HP:0000001	All
MYL3_HUMAN	HP:0000001	All
MYLK2_HUMAN	HP:0000001	All
MYO1A_HUMAN	HP:0000001	All
MYO1E_HUMAN	HP:0000001	All
MYO3A_HUMAN	HP:0000001	All
MYO5A_HUMAN	HP:0000001	All
MYO5B_HUMAN	HP:0000001	All
MYO6_HUMAN	HP:0000001	All
MYO7A_HUMAN	HP:0000001	All
MYOC_HUMAN	HP:0000001	All
MYOTI_HUMAN	HP:0000001	All
MYOZ2_HUMAN	HP:0000001	All
MYP0_HUMAN	HP:0000001	All
MYPC3_HUMAN	HP:0000001	All
MYPN_HUMAN	HP:0000001	All
MYPR_HUMAN	HP:0000001	All
NAA10_HUMAN	HP:0000001	All
NAGS_HUMAN	HP:0000001	All
NAL12_HUMAN	HP:0000001	All
NALCN_HUMAN	HP:0000001	All
NALP7_HUMAN	HP:0000001	All
NBAS_HUMAN	HP:0000001	All
NBEL2_HUMAN	HP:0000001	All
NBN_HUMAN	HP:0000001	All
NCF4_HUMAN	HP:0000001	All
NCKX1_HUMAN	HP:0000001	All
NCKX5_HUMAN	HP:0000001	All
NCOA4_HUMAN	HP:0000001	All
NCPR_HUMAN	HP:0000001	All
NDE1_HUMAN	HP:0000001	All
NDKA_HUMAN	HP:0000001	All
NDP_HUMAN	HP:0000001	All
NDRG1_HUMAN	HP:0000001	All
NDUA2_HUMAN	HP:0000001	All
NDUA9_HUMAN	HP:0000001	All
NDUAB_HUMAN	HP:0000001	All
NDUAC_HUMAN	HP:0000001	All
NDUB3_HUMAN	HP:0000001	All
NDUB9_HUMAN	HP:0000001	All
NDUF4_HUMAN	HP:0000001	All
NDUF5_HUMAN	HP:0000001	All
NDUF6_HUMAN	HP:0000001	All
NDUS2_HUMAN	HP:0000001	All
NDUS3_HUMAN	HP:0000001	All
NDUS4_HUMAN	HP:0000001	All
NDUS7_HUMAN	HP:0000001	All
NDUS8_HUMAN	HP:0000001	All
NDUV1_HUMAN	HP:0000001	All
NDUV2_HUMAN	HP:0000001	All
NEC1_HUMAN	HP:0000001	All
NECD_HUMAN	HP:0000001	All
NEK2_HUMAN	HP:0000001	All
NEK8_HUMAN	HP:0000001	All
NEMO_HUMAN	HP:0000001	All
NEP1_HUMAN	HP:0000001	All
NETR_HUMAN	HP:0000001	All
NEU2_HUMAN	HP:0000001	All
NEUS_HUMAN	HP:0000001	All
NF1_HUMAN	HP:0000001	All
NFKB2_HUMAN	HP:0000001	All
NFL_HUMAN	HP:0000001	All
NFU1_HUMAN	HP:0000001	All
NGF_HUMAN	HP:0000001	All
NGLY1_HUMAN	HP:0000001	All
NGN3_HUMAN	HP:0000001	All
NHEJ1_HUMAN	HP:0000001	All
NHLC1_HUMAN	HP:0000001	All
NHP2_HUMAN	HP:0000001	All
NHRF1_HUMAN	HP:0000001	All
NHS_HUMAN	HP:0000001	All
NICA_HUMAN	HP:0000001	All
NIPA1_HUMAN	HP:0000001	All
NIPA4_HUMAN	HP:0000001	All
NIPBL_HUMAN	HP:0000001	All
NK3R_HUMAN	HP:0000001	All
NKX21_HUMAN	HP:0000001	All
NKX25_HUMAN	HP:0000001	All
NKX32_HUMAN	HP:0000001	All
NLGNX_HUMAN	HP:0000001	All
NMDE1_HUMAN	HP:0000001	All
NMDE2_HUMAN	HP:0000001	All
NMNA1_HUMAN	HP:0000001	All
NNTM_HUMAN	HP:0000001	All
NOBOX_HUMAN	HP:0000001	All
NOD2_HUMAN	HP:0000001	All
NODAL_HUMAN	HP:0000001	All
NOL3_HUMAN	HP:0000001	All
NOP56_HUMAN	HP:0000001	All
NOTC1_HUMAN	HP:0000001	All
NOTC2_HUMAN	HP:0000001	All
NOTC3_HUMAN	HP:0000001	All
NPC1_HUMAN	HP:0000001	All
NPC2_HUMAN	HP:0000001	All
NPHN_HUMAN	HP:0000001	All
NPHP1_HUMAN	HP:0000001	All
NPT2A_HUMAN	HP:0000001	All
NPT2B_HUMAN	HP:0000001	All
NPT2C_HUMAN	HP:0000001	All
NR0B1_HUMAN	HP:0000001	All
NR0B2_HUMAN	HP:0000001	All
NR2E3_HUMAN	HP:0000001	All
NRL_HUMAN	HP:0000001	All
NRTN_HUMAN	HP:0000001	All
NSD1_HUMAN	HP:0000001	All
NSDHL_HUMAN	HP:0000001	All
NTCP2_HUMAN	HP:0000001	All
NTF4_HUMAN	HP:0000001	All
NTNG1_HUMAN	HP:0000001	All
NTRK2_HUMAN	HP:0000001	All
NU1M_HUMAN	HP:0000001	All
NU214_HUMAN	HP:0000001	All
NU2M_HUMAN	HP:0000001	All
NU5M_HUMAN	HP:0000001	All
NU6M_HUMAN	HP:0000001	All
NUBPL_HUMAN	HP:0000001	All
NUP62_HUMAN	HP:0000001	All
NYX_HUMAN	HP:0000001	All
OAT_HUMAN	HP:0000001	All
OBSL1_HUMAN	HP:0000001	All
ODB2_HUMAN	HP:0000001	All
ODBA_HUMAN	HP:0000001	All
ODBB_HUMAN	HP:0000001	All
ODO1_HUMAN	HP:0000001	All
ODP2_HUMAN	HP:0000001	All
ODPB_HUMAN	HP:0000001	All
ODPX_HUMAN	HP:0000001	All
OFD1_HUMAN	HP:0000001	All
OFUT1_HUMAN	HP:0000001	All
OPA1_HUMAN	HP:0000001	All
OPHN1_HUMAN	HP:0000001	All
OPLA_HUMAN	HP:0000001	All
OPSB_HUMAN	HP:0000001	All
OPSD_HUMAN	HP:0000001	All
ORC1_HUMAN	HP:0000001	All
ORC4_HUMAN	HP:0000001	All
ORC6_HUMAN	HP:0000001	All
ORNT1_HUMAN	HP:0000001	All
OSMR_HUMAN	HP:0000001	All
OST48_HUMAN	HP:0000001	All
OSTM1_HUMAN	HP:0000001	All
OTC_HUMAN	HP:0000001	All
OTOAN_HUMAN	HP:0000001	All
OTOF_HUMAN	HP:0000001	All
OTOG_HUMAN	HP:0000001	All
OTX2_HUMAN	HP:0000001	All
P2Y12_HUMAN	HP:0000001	All
P3H2_HUMAN	HP:0000001	All
P3_HUMAN	HP:0000001	All
P5CR1_HUMAN	HP:0000001	All
P85B_HUMAN	HP:0000001	All
PA2G5_HUMAN	HP:0000001	All
PABP2_HUMAN	HP:0000001	All
PAHX_HUMAN	HP:0000001	All
PAI1_HUMAN	HP:0000001	All
PALB2_HUMAN	HP:0000001	All
PAPD1_HUMAN	HP:0000001	All
PAPP1_HUMAN	HP:0000001	All
PAPS2_HUMAN	HP:0000001	All
PARK7_HUMAN	HP:0000001	All
PAX2_HUMAN	HP:0000001	All
PAX4_HUMAN	HP:0000001	All
PAX6_HUMAN	HP:0000001	All
PAX7_HUMAN	HP:0000001	All
PAX8_HUMAN	HP:0000001	All
PAX9_HUMAN	HP:0000001	All
PBX1_HUMAN	HP:0000001	All
PCCA_HUMAN	HP:0000001	All
PCCB_HUMAN	HP:0000001	All
PCD19_HUMAN	HP:0000001	All
PCFT_HUMAN	HP:0000001	All
PCKGC_HUMAN	HP:0000001	All
PCKGM_HUMAN	HP:0000001	All
PCM1_HUMAN	HP:0000001	All
PCNT_HUMAN	HP:0000001	All
PCSK9_HUMAN	HP:0000001	All
PDC10_HUMAN	HP:0000001	All
PDE11_HUMAN	HP:0000001	All
PDE6A_HUMAN	HP:0000001	All
PDE6B_HUMAN	HP:0000001	All
PDE6C_HUMAN	HP:0000001	All
PDE8B_HUMAN	HP:0000001	All
PDGFB_HUMAN	HP:0000001	All
PDIA1_HUMAN	HP:0000001	All
PDK3_HUMAN	HP:0000001	All
PDP1_HUMAN	HP:0000001	All
PDX1_HUMAN	HP:0000001	All
PDYN_HUMAN	HP:0000001	All
PDZD7_HUMAN	HP:0000001	All
PEBB_HUMAN	HP:0000001	All
PEDF_HUMAN	HP:0000001	All
PEN2_HUMAN	HP:0000001	All
PEO1_HUMAN	HP:0000001	All
PER2_HUMAN	HP:0000001	All
PERE_HUMAN	HP:0000001	All
PERF_HUMAN	HP:0000001	All
PERM_HUMAN	HP:0000001	All
PEX10_HUMAN	HP:0000001	All
PEX12_HUMAN	HP:0000001	All
PEX13_HUMAN	HP:0000001	All
PEX14_HUMAN	HP:0000001	All
PEX16_HUMAN	HP:0000001	All
PEX19_HUMAN	HP:0000001	All
PEX1_HUMAN	HP:0000001	All
PEX2_HUMAN	HP:0000001	All
PEX3_HUMAN	HP:0000001	All
PEX5_HUMAN	HP:0000001	All
PEX6_HUMAN	HP:0000001	All
PGAP2_HUMAN	HP:0000001	All
PGBM_HUMAN	HP:0000001	All
PGFRA_HUMAN	HP:0000001	All
PGFRB_HUMAN	HP:0000001	All
PGFRL_HUMAN	HP:0000001	All
PGK1_HUMAN	HP:0000001	All
PGS2_HUMAN	HP:0000001	All
PH4H_HUMAN	HP:0000001	All
PHB_HUMAN	HP:0000001	All
PHC1_HUMAN	HP:0000001	All
PHEX_HUMAN	HP:0000001	All
PHF6_HUMAN	HP:0000001	All
PHKG2_HUMAN	HP:0000001	All
PHS_HUMAN	HP:0000001	All
PHX2A_HUMAN	HP:0000001	All
PHX2B_HUMAN	HP:0000001	All
PI3R5_HUMAN	HP:0000001	All
PI51C_HUMAN	HP:0000001	All
PICAL_HUMAN	HP:0000001	All
PIEZ1_HUMAN	HP:0000001	All
PIGA_HUMAN	HP:0000001	All
PIGL_HUMAN	HP:0000001	All
PIGN_HUMAN	HP:0000001	All
PIGO_HUMAN	HP:0000001	All
PIGV_HUMAN	HP:0000001	All
PINK1_HUMAN	HP:0000001	All
PIT1_HUMAN	HP:0000001	All
PITM3_HUMAN	HP:0000001	All
PITX1_HUMAN	HP:0000001	All
PITX2_HUMAN	HP:0000001	All
PITX3_HUMAN	HP:0000001	All
PJVK_HUMAN	HP:0000001	All
PK3CA_HUMAN	HP:0000001	All
PKD1_HUMAN	HP:0000001	All
PKD2_HUMAN	HP:0000001	All
PKHD1_HUMAN	HP:0000001	All
PKHM1_HUMAN	HP:0000001	All
PKP1_HUMAN	HP:0000001	All
PKP2_HUMAN	HP:0000001	All
PKR2_HUMAN	HP:0000001	All
PLAG1_HUMAN	HP:0000001	All
PLAK_HUMAN	HP:0000001	All
PLCB_HUMAN	HP:0000001	All
PLCD1_HUMAN	HP:0000001	All
PLCG2_HUMAN	HP:0000001	All
PLIN1_HUMAN	HP:0000001	All
PLMN_HUMAN	HP:0000001	All
PLOD1_HUMAN	HP:0000001	All
PLOD2_HUMAN	HP:0000001	All
PLOD3_HUMAN	HP:0000001	All
PLPL1_HUMAN	HP:0000001	All
PLPL2_HUMAN	HP:0000001	All
PLPL9_HUMAN	HP:0000001	All
PLST_HUMAN	HP:0000001	All
PMGE_HUMAN	HP:0000001	All
PMGT1_HUMAN	HP:0000001	All
PMGT2_HUMAN	HP:0000001	All
PMM2_HUMAN	HP:0000001	All
PMP22_HUMAN	HP:0000001	All
PMS2_HUMAN	HP:0000001	All
PNKD_HUMAN	HP:0000001	All
PNKP_HUMAN	HP:0000001	All
PNPH_HUMAN	HP:0000001	All
PNPO_HUMAN	HP:0000001	All
PNPT1_HUMAN	HP:0000001	All
PO3F4_HUMAN	HP:0000001	All
PO4F3_HUMAN	HP:0000001	All
PO6F2_HUMAN	HP:0000001	All
POC1A_HUMAN	HP:0000001	All
PODO_HUMAN	HP:0000001	All
POF1B_HUMAN	HP:0000001	All
POLH_HUMAN	HP:0000001	All
POMP_HUMAN	HP:0000001	All
POMT2_HUMAN	HP:0000001	All
PON1_HUMAN	HP:0000001	All
PORCN_HUMAN	HP:0000001	All
PORED_HUMAN	HP:0000001	All
PPA5_HUMAN	HP:0000001	All
PPAL_HUMAN	HP:0000001	All
PPGB_HUMAN	HP:0000001	All
PPIB_HUMAN	HP:0000001	All
PPIP1_HUMAN	HP:0000001	All
PPM1D_HUMAN	HP:0000001	All
PPOX_HUMAN	HP:0000001	All
PPR3A_HUMAN	HP:0000001	All
PPT1_HUMAN	HP:0000001	All
PRAX_HUMAN	HP:0000001	All
PRCC_HUMAN	HP:0000001	All
PRCD_HUMAN	HP:0000001	All
PRD16_HUMAN	HP:0000001	All
PRDM5_HUMAN	HP:0000001	All
PRG4_HUMAN	HP:0000001	All
PRGR_HUMAN	HP:0000001	All
PRIC1_HUMAN	HP:0000001	All
PRIC2_HUMAN	HP:0000001	All
PRIPO_HUMAN	HP:0000001	All
PRKRA_HUMAN	HP:0000001	All
PROC_HUMAN	HP:0000001	All
PROF1_HUMAN	HP:0000001	All
PROK2_HUMAN	HP:0000001	All
PROM1_HUMAN	HP:0000001	All
PROP_HUMAN	HP:0000001	All
PROS_HUMAN	HP:0000001	All
PRP31_HUMAN	HP:0000001	All
PRP8_HUMAN	HP:0000001	All
PRPF3_HUMAN	HP:0000001	All
PRPH2_HUMAN	HP:0000001	All
PRPS1_HUMAN	HP:0000001	All
PRRT2_HUMAN	HP:0000001	All
PRRX1_HUMAN	HP:0000001	All
PSB8_HUMAN	HP:0000001	All
PSN1_HUMAN	HP:0000001	All
PSN2_HUMAN	HP:0000001	All
PSPB_HUMAN	HP:0000001	All
PSPC_HUMAN	HP:0000001	All
PTC2_HUMAN	HP:0000001	All
PTEN_HUMAN	HP:0000001	All
PTF1A_HUMAN	HP:0000001	All
PTGIS_HUMAN	HP:0000001	All
PTH1R_HUMAN	HP:0000001	All
PTHR_HUMAN	HP:0000001	All
PTHY_HUMAN	HP:0000001	All
PTN11_HUMAN	HP:0000001	All
PTN12_HUMAN	HP:0000001	All
PTN14_HUMAN	HP:0000001	All
PTN2_HUMAN	HP:0000001	All
PTPRC_HUMAN	HP:0000001	All
PTPRJ_HUMAN	HP:0000001	All
PTPRO_HUMAN	HP:0000001	All
PTPS_HUMAN	HP:0000001	All
PUR8_HUMAN	HP:0000001	All
PUR9_HUMAN	HP:0000001	All
PVR_HUMAN	HP:0000001	All
PX11B_HUMAN	HP:0000001	All
PYC_HUMAN	HP:0000001	All
PYGM_HUMAN	HP:0000001	All
PYRD_HUMAN	HP:0000001	All
P_HUMAN	HP:0000001	All
QCR2_HUMAN	HP:0000001	All
QCR7_HUMAN	HP:0000001	All
QCR8_HUMAN	HP:0000001	All
R9BP_HUMAN	HP:0000001	All
RA51C_HUMAN	HP:0000001	All
RA54B_HUMAN	HP:0000001	All
RAB23_HUMAN	HP:0000001	All
RAB28_HUMAN	HP:0000001	All
RAB7A_HUMAN	HP:0000001	All
RAC2_HUMAN	HP:0000001	All
RAD21_HUMAN	HP:0000001	All
RAD50_HUMAN	HP:0000001	All
RAD54_HUMAN	HP:0000001	All
RADI_HUMAN	HP:0000001	All
RAE1_HUMAN	HP:0000001	All
RAF1_HUMAN	HP:0000001	All
RAG1_HUMAN	HP:0000001	All
RAG2_HUMAN	HP:0000001	All
RAI1_HUMAN	HP:0000001	All
RAPSN_HUMAN	HP:0000001	All
RARA_HUMAN	HP:0000001	All
RARB_HUMAN	HP:0000001	All
RASA1_HUMAN	HP:0000001	All
RASH_HUMAN	HP:0000001	All
RASK_HUMAN	HP:0000001	All
RASN_HUMAN	HP:0000001	All
RB27A_HUMAN	HP:0000001	All
RB33B_HUMAN	HP:0000001	All
RB39B_HUMAN	HP:0000001	All
RB3GP_HUMAN	HP:0000001	All
RB40L_HUMAN	HP:0000001	All
RBCC1_HUMAN	HP:0000001	All
RBGPR_HUMAN	HP:0000001	All
RBM10_HUMAN	HP:0000001	All
RBM20_HUMAN	HP:0000001	All
RBM28_HUMAN	HP:0000001	All
RBM8A_HUMAN	HP:0000001	All
RBP2_HUMAN	HP:0000001	All
RBP56_HUMAN	HP:0000001	All
RB_HUMAN	HP:0000001	All
RD3_HUMAN	HP:0000001	All
RDH12_HUMAN	HP:0000001	All
RECQ4_HUMAN	HP:0000001	All
REEP1_HUMAN	HP:0000001	All
REG1A_HUMAN	HP:0000001	All
RELN_HUMAN	HP:0000001	All
REN3B_HUMAN	HP:0000001	All
RENBP_HUMAN	HP:0000001	All
RENI_HUMAN	HP:0000001	All
RET3_HUMAN	HP:0000001	All
RET4_HUMAN	HP:0000001	All
RET_HUMAN	HP:0000001	All
RFT1_HUMAN	HP:0000001	All
RFX5_HUMAN	HP:0000001	All
RFX6_HUMAN	HP:0000001	All
RFXAP_HUMAN	HP:0000001	All
RFXK_HUMAN	HP:0000001	All
RGMC_HUMAN	HP:0000001	All
RGR_HUMAN	HP:0000001	All
RGS9_HUMAN	HP:0000001	All
RHAG_HUMAN	HP:0000001	All
RHDF2_HUMAN	HP:0000001	All
RHG26_HUMAN	HP:0000001	All
RHG31_HUMAN	HP:0000001	All
RIN2_HUMAN	HP:0000001	All
RIT1_HUMAN	HP:0000001	All
RL11_HUMAN	HP:0000001	All
RL21_HUMAN	HP:0000001	All
RL26_HUMAN	HP:0000001	All
RL35A_HUMAN	HP:0000001	All
RL5_HUMAN	HP:0000001	All
RLBP1_HUMAN	HP:0000001	All
RM03_HUMAN	HP:0000001	All
RM44_HUMAN	HP:0000001	All
RMND1_HUMAN	HP:0000001	All
RN135_HUMAN	HP:0000001	All
RN139_HUMAN	HP:0000001	All
RN168_HUMAN	HP:0000001	All
RN216_HUMAN	HP:0000001	All
RN5A_HUMAN	HP:0000001	All
RNF6_HUMAN	HP:0000001	All
RNH2A_HUMAN	HP:0000001	All
RNH2B_HUMAN	HP:0000001	All
RNH2C_HUMAN	HP:0000001	All
RNT2_HUMAN	HP:0000001	All
RNZ2_HUMAN	HP:0000001	All
ROBO2_HUMAN	HP:0000001	All
ROGDI_HUMAN	HP:0000001	All
ROM1_HUMAN	HP:0000001	All
ROR2_HUMAN	HP:0000001	All
RPAC1_HUMAN	HP:0000001	All
RPAC2_HUMAN	HP:0000001	All
RPC1_HUMAN	HP:0000001	All
RPC2_HUMAN	HP:0000001	All
RPE65_HUMAN	HP:0000001	All
RPGR1_HUMAN	HP:0000001	All
RPIA_HUMAN	HP:0000001	All
RS10_HUMAN	HP:0000001	All
RS14_HUMAN	HP:0000001	All
RS17_HUMAN	HP:0000001	All
RS24_HUMAN	HP:0000001	All
RS26_HUMAN	HP:0000001	All
RS4X_HUMAN	HP:0000001	All
RS7_HUMAN	HP:0000001	All
RSH4A_HUMAN	HP:0000001	All
RSMN_HUMAN	HP:0000001	All
RSPH1_HUMAN	HP:0000001	All
RSPO1_HUMAN	HP:0000001	All
RSPO4_HUMAN	HP:0000001	All
RT16_HUMAN	HP:0000001	All
RTN2_HUMAN	HP:0000001	All
RUNX2_HUMAN	HP:0000001	All
RUXE_HUMAN	HP:0000001	All
RXFP2_HUMAN	HP:0000001	All
RX_HUMAN	HP:0000001	All
RYR1_HUMAN	HP:0000001	All
RYR2_HUMAN	HP:0000001	All
S100G_HUMAN	HP:0000001	All
S12A1_HUMAN	HP:0000001	All
S12A3_HUMAN	HP:0000001	All
S17A5_HUMAN	HP:0000001	All
S19A2_HUMAN	HP:0000001	All
S22A5_HUMAN	HP:0000001	All
S22AC_HUMAN	HP:0000001	All
S22AI_HUMAN	HP:0000001	All
S2538_HUMAN	HP:0000001	All
S26A2_HUMAN	HP:0000001	All
S26A4_HUMAN	HP:0000001	All
S26A5_HUMAN	HP:0000001	All
S26A8_HUMAN	HP:0000001	All
S27A4_HUMAN	HP:0000001	All
S35A1_HUMAN	HP:0000001	All
S35A2_HUMAN	HP:0000001	All
S35D1_HUMAN	HP:0000001	All
S36A2_HUMAN	HP:0000001	All
S39A4_HUMAN	HP:0000001	All
S39AD_HUMAN	HP:0000001	All
S3TC2_HUMAN	HP:0000001	All
S40A1_HUMAN	HP:0000001	All
S45A2_HUMAN	HP:0000001	All
S4A11_HUMAN	HP:0000001	All
S52A2_HUMAN	HP:0000001	All
S52A3_HUMAN	HP:0000001	All
S5A2_HUMAN	HP:0000001	All
S6A19_HUMAN	HP:0000001	All
S6A20_HUMAN	HP:0000001	All
SACS_HUMAN	HP:0000001	All
SAHH_HUMAN	HP:0000001	All
SALL1_HUMAN	HP:0000001	All
SALL4_HUMAN	HP:0000001	All
SAMD9_HUMAN	HP:0000001	All
SAMH1_HUMAN	HP:0000001	All
SAP3_HUMAN	HP:0000001	All
SAR1B_HUMAN	HP:0000001	All
SART3_HUMAN	HP:0000001	All
SATB2_HUMAN	HP:0000001	All
SBDS_HUMAN	HP:0000001	All
SC23A_HUMAN	HP:0000001	All
SC23B_HUMAN	HP:0000001	All
SC5A1_HUMAN	HP:0000001	All
SC5A5_HUMAN	HP:0000001	All
SC5A7_HUMAN	HP:0000001	All
SC5D_HUMAN	HP:0000001	All
SC6A2_HUMAN	HP:0000001	All
SC6A3_HUMAN	HP:0000001	All
SC6A5_HUMAN	HP:0000001	All
SC6A8_HUMAN	HP:0000001	All
SCF_HUMAN	HP:0000001	All
SCN1A_HUMAN	HP:0000001	All
SCN1B_HUMAN	HP:0000001	All
SCN2A_HUMAN	HP:0000001	All
SCN3B_HUMAN	HP:0000001	All
SCN4A_HUMAN	HP:0000001	All
SCN4B_HUMAN	HP:0000001	All
SCN8A_HUMAN	HP:0000001	All
SCNNA_HUMAN	HP:0000001	All
SCNNB_HUMAN	HP:0000001	All
SCO2_HUMAN	HP:0000001	All
SCRB2_HUMAN	HP:0000001	All
SDCG8_HUMAN	HP:0000001	All
SDHF1_HUMAN	HP:0000001	All
SEBP2_HUMAN	HP:0000001	All
SEC63_HUMAN	HP:0000001	All
SEM3E_HUMAN	HP:0000001	All
SEM4A_HUMAN	HP:0000001	All
SEN2_HUMAN	HP:0000001	All
SEN34_HUMAN	HP:0000001	All
SEN54_HUMAN	HP:0000001	All
SEP12_HUMAN	HP:0000001	All
SERA_HUMAN	HP:0000001	All
SERB_HUMAN	HP:0000001	All
SERC_HUMAN	HP:0000001	All
SERPH_HUMAN	HP:0000001	All
SETBP_HUMAN	HP:0000001	All
SF3B1_HUMAN	HP:0000001	All
SF3B4_HUMAN	HP:0000001	All
SFTPD_HUMAN	HP:0000001	All
SGCA_HUMAN	HP:0000001	All
SGCB_HUMAN	HP:0000001	All
SGCD_HUMAN	HP:0000001	All
SGCE_HUMAN	HP:0000001	All
SGCG_HUMAN	HP:0000001	All
SH21A_HUMAN	HP:0000001	All
SH2B3_HUMAN	HP:0000001	All
SH3G1_HUMAN	HP:0000001	All
SHH_HUMAN	HP:0000001	All
SHIP2_HUMAN	HP:0000001	All
SHOC2_HUMAN	HP:0000001	All
SHOX_HUMAN	HP:0000001	All
SHRM4_HUMAN	HP:0000001	All
SIAT9_HUMAN	HP:0000001	All
SIL1_HUMAN	HP:0000001	All
SIM1_HUMAN	HP:0000001	All
SIX1_HUMAN	HP:0000001	All
SIX3_HUMAN	HP:0000001	All
SIX6_HUMAN	HP:0000001	All
SKIV2_HUMAN	HP:0000001	All
SKI_HUMAN	HP:0000001	All
SLC31_HUMAN	HP:0000001	All
SLIK1_HUMAN	HP:0000001	All
SLIK6_HUMAN	HP:0000001	All
SLUR1_HUMAN	HP:0000001	All
SLX4_HUMAN	HP:0000001	All
SMAD4_HUMAN	HP:0000001	All
SMAD6_HUMAN	HP:0000001	All
SMAD9_HUMAN	HP:0000001	All
SMAL1_HUMAN	HP:0000001	All
SMBP2_HUMAN	HP:0000001	All
SMC1A_HUMAN	HP:0000001	All
SMC3_HUMAN	HP:0000001	All
SMCA2_HUMAN	HP:0000001	All
SMCA4_HUMAN	HP:0000001	All
SMHD1_HUMAN	HP:0000001	All
SMN_HUMAN	HP:0000001	All
SMOC1_HUMAN	HP:0000001	All
SMPX_HUMAN	HP:0000001	All
SMRCD_HUMAN	HP:0000001	All
SNAI2_HUMAN	HP:0000001	All
SNF5_HUMAN	HP:0000001	All
SNIP1_HUMAN	HP:0000001	All
SNTA1_HUMAN	HP:0000001	All
SNX10_HUMAN	HP:0000001	All
SO1B1_HUMAN	HP:0000001	All
SO2A1_HUMAN	HP:0000001	All
SOBP_HUMAN	HP:0000001	All
SOMA_HUMAN	HP:0000001	All
SOS1_HUMAN	HP:0000001	All
SOST_HUMAN	HP:0000001	All
SOX18_HUMAN	HP:0000001	All
SOX2_HUMAN	HP:0000001	All
SOX3_HUMAN	HP:0000001	All
SOX9_HUMAN	HP:0000001	All
SP110_HUMAN	HP:0000001	All
SP7_HUMAN	HP:0000001	All
SPAG1_HUMAN	HP:0000001	All
SPAST_HUMAN	HP:0000001	All
SPAT7_HUMAN	HP:0000001	All
SPB6_HUMAN	HP:0000001	All
SPCS_HUMAN	HP:0000001	All
SPD2B_HUMAN	HP:0000001	All
SPE39_HUMAN	HP:0000001	All
SPG21_HUMAN	HP:0000001	All
SPG7_HUMAN	HP:0000001	All
SPHM_HUMAN	HP:0000001	All
SPIT2_HUMAN	HP:0000001	All
SPRE1_HUMAN	HP:0000001	All
SPRE_HUMAN	HP:0000001	All
SPSY_HUMAN	HP:0000001	All
SPTA1_HUMAN	HP:0000001	All
SPTB1_HUMAN	HP:0000001	All
SPTC1_HUMAN	HP:0000001	All
SPTC2_HUMAN	HP:0000001	All
SPTN2_HUMAN	HP:0000001	All
SPY4_HUMAN	HP:0000001	All
SPYA_HUMAN	HP:0000001	All
SQSTM_HUMAN	HP:0000001	All
SRAC1_HUMAN	HP:0000001	All
SRCAP_HUMAN	HP:0000001	All
SREC2_HUMAN	HP:0000001	All
SRP72_HUMAN	HP:0000001	All
SRPX2_HUMAN	HP:0000001	All
SSDH_HUMAN	HP:0000001	All
SSR5_HUMAN	HP:0000001	All
SSX1_HUMAN	HP:0000001	All
ST14_HUMAN	HP:0000001	All
STA5B_HUMAN	HP:0000001	All
STABP_HUMAN	HP:0000001	All
STAC3_HUMAN	HP:0000001	All
STAR_HUMAN	HP:0000001	All
STAT3_HUMAN	HP:0000001	All
STAT4_HUMAN	HP:0000001	All
STF1_HUMAN	HP:0000001	All
STIL_HUMAN	HP:0000001	All
STIM1_HUMAN	HP:0000001	All
STK11_HUMAN	HP:0000001	All
STK4_HUMAN	HP:0000001	All
STOM_HUMAN	HP:0000001	All
STS_HUMAN	HP:0000001	All
STX11_HUMAN	HP:0000001	All
STXB1_HUMAN	HP:0000001	All
STXB2_HUMAN	HP:0000001	All
SUCA_HUMAN	HP:0000001	All
SUCB1_HUMAN	HP:0000001	All
SUFU_HUMAN	HP:0000001	All
SUH_HUMAN	HP:0000001	All
SUIS_HUMAN	HP:0000001	All
SUMO1_HUMAN	HP:0000001	All
SURF1_HUMAN	HP:0000001	All
SYAC_HUMAN	HP:0000001	All
SYAM_HUMAN	HP:0000001	All
SYDC_HUMAN	HP:0000001	All
SYEM_HUMAN	HP:0000001	All
SYFM_HUMAN	HP:0000001	All
SYGP1_HUMAN	HP:0000001	All
SYK_HUMAN	HP:0000001	All
SYN1_HUMAN	HP:0000001	All
SYNJ1_HUMAN	HP:0000001	All
SYPH_HUMAN	HP:0000001	All
SYRM_HUMAN	HP:0000001	All
SYSM_HUMAN	HP:0000001	All
SYUA_HUMAN	HP:0000001	All
SYUB_HUMAN	HP:0000001	All
SYYC_HUMAN	HP:0000001	All
SYYM_HUMAN	HP:0000001	All
T126A_HUMAN	HP:0000001	All
TAB2_HUMAN	HP:0000001	All
TACD2_HUMAN	HP:0000001	All
TACT_HUMAN	HP:0000001	All
TAL1_HUMAN	HP:0000001	All
TALDO_HUMAN	HP:0000001	All
TAP1_HUMAN	HP:0000001	All
TAP2_HUMAN	HP:0000001	All
TBA1A_HUMAN	HP:0000001	All
TBB2B_HUMAN	HP:0000001	All
TBB3_HUMAN	HP:0000001	All
TBB4A_HUMAN	HP:0000001	All
TBC24_HUMAN	HP:0000001	All
TBCD7_HUMAN	HP:0000001	All
TBG1_HUMAN	HP:0000001	All
TBP_HUMAN	HP:0000001	All
TBX15_HUMAN	HP:0000001	All
TBX19_HUMAN	HP:0000001	All
TBX1_HUMAN	HP:0000001	All
TBX20_HUMAN	HP:0000001	All
TBX22_HUMAN	HP:0000001	All
TBX3_HUMAN	HP:0000001	All
TBX4_HUMAN	HP:0000001	All
TBX5_HUMAN	HP:0000001	All
TCAM1_HUMAN	HP:0000001	All
TCL1A_HUMAN	HP:0000001	All
TCO2_HUMAN	HP:0000001	All
TCOF_HUMAN	HP:0000001	All
TCPE_HUMAN	HP:0000001	All
TCPR2_HUMAN	HP:0000001	All
[truncated: 125,008 more rows]

## Sheet: Table S2B
Supplementary Table S2B. CAFA2 challenge benchmark
Benchmark of the CAFA2 challenge was collected from annotations that appeared during January 2014 until September 2014. Proteins in the benchmark of the CAFA2 challenge are not associated with any HPO terms before the submission date (January 2014) but received HPO annotations by September 2014.
Gene Name	HPO Term ID	HPO Term Name
1433E_HUMAN	HP:0000001	All
5NTC_HUMAN	HP:0000001	All
ABCA5_HUMAN	HP:0000001	All
ACBP_HUMAN	HP:0000001	All
ACHA7_HUMAN	HP:0000001	All
ACTH_HUMAN	HP:0000001	All
ADA2B_HUMAN	HP:0000001	All
ADCY1_HUMAN	HP:0000001	All
ADCY6_HUMAN	HP:0000001	All
ADNP_HUMAN	HP:0000001	All
AGGF1_HUMAN	HP:0000001	All
AGM1_HUMAN	HP:0000001	All
AMMR1_HUMAN	HP:0000001	All
AMPD2_HUMAN	HP:0000001	All
ANO10_HUMAN	HP:0000001	All
ANO5_HUMAN	HP:0000001	All
ARNT2_HUMAN	HP:0000001	All
ASPH_HUMAN	HP:0000001	All
AT10A_HUMAN	HP:0000001	All
ATLA3_HUMAN	HP:0000001	All
ATOH7_HUMAN	HP:0000001	All
ATP8_HUMAN	HP:0000001	All
ATRIP_HUMAN	HP:0000001	All
BAZ1B_HUMAN	HP:0000001	All
BCL6_HUMAN	HP:0000001	All
BIN1_HUMAN	HP:0000001	All
BIRC3_HUMAN	HP:0000001	All
BMS1_HUMAN	HP:0000001	All
C2CD3_HUMAN	HP:0000001	All
CAH5A_HUMAN	HP:0000001	All
CALR_HUMAN	HP:0000001	All
CAN5_HUMAN	HP:0000001	All
CATF_HUMAN	HP:0000001	All
CCND2_HUMAN	HP:0000001	All
CCNO_HUMAN	HP:0000001	All
CCR6_HUMAN	HP:0000001	All
CDN1A_HUMAN	HP:0000001	All
CDN2C_HUMAN	HP:0000001	All
CH037_HUMAN	HP:0000001	All
CHC10_HUMAN	HP:0000001	All
CHIP_HUMAN	HP:0000001	All
CIB2_HUMAN	HP:0000001	All
CLCN2_HUMAN	HP:0000001	All
CLIP2_HUMAN	HP:0000001	All
CLP1_HUMAN	HP:0000001	All
CNTN4_HUMAN	HP:0000001	All
CNTP1_HUMAN	HP:0000001	All
CO4A_HUMAN	HP:0000001	All
COA5_HUMAN	HP:0000001	All
COASY_HUMAN	HP:0000001	All
COCA1_HUMAN	HP:0000001	All
CORA1_HUMAN	HP:0000001	All
COT1_HUMAN	HP:0000001	All
COT2_HUMAN	HP:0000001	All
COX10_HUMAN	HP:0000001	All
COX20_HUMAN	HP:0000001	All
COX2_HUMAN	HP:0000001	All
CRKL_HUMAN	HP:0000001	All
CSPP1_HUMAN	HP:0000001	All
CTLA4_HUMAN	HP:0000001	All
CTNA3_HUMAN	HP:0000001	All
CTSR2_HUMAN	HP:0000001	All
CYFP1_HUMAN	HP:0000001	All
DCAF8_HUMAN	HP:0000001	All
DCTN4_HUMAN	HP:0000001	All
DEAF1_HUMAN	HP:0000001	All
DGAT1_HUMAN	HP:0000001	All
DHDDS_HUMAN	HP:0000001	All
DNM3A_HUMAN	HP:0000001	All
DOCK7_HUMAN	HP:0000001	All
DPB1_HUMAN	HP:0000001	All
DPOD1_HUMAN	HP:0000001	All
DPP6_HUMAN	HP:0000001	All
DRD5_HUMAN	HP:0000001	All
DYR1B_HUMAN	HP:0000001	All
EAA3_HUMAN	HP:0000001	All
ECHP_HUMAN	HP:0000001	All
EDN1_HUMAN	HP:0000001	All
ELOV5_HUMAN	HP:0000001	All
ELP4_HUMAN	HP:0000001	All
EPOR_HUMAN	HP:0000001	All
ERBB4_HUMAN	HP:0000001	All
ESR1_HUMAN	HP:0000001	All
EYS_HUMAN	HP:0000001	All
FAT4_HUMAN	HP:0000001	All
FBX31_HUMAN	HP:0000001	All
FCG3A_HUMAN	HP:0000001	All
FGF20_HUMAN	HP:0000001	All
FGF5_HUMAN	HP:0000001	All
FIBG_HUMAN	HP:0000001	All
FLI1_HUMAN	HP:0000001	All
FLII_HUMAN	HP:0000001	All
FNBP4_HUMAN	HP:0000001	All
FRIH_HUMAN	HP:0000001	All
GATA5_HUMAN	HP:0000001	All
GBRA1_HUMAN	HP:0000001	All
GBRD_HUMAN	HP:0000001	All
GFI1B_HUMAN	HP:0000001	All
GMPPA_HUMAN	HP:0000001	All
GNT2A_HUMAN	HP:0000001	All
GPC4_HUMAN	HP:0000001	All
GREM1_HUMAN	HP:0000001	All
GRHL3_HUMAN	HP:0000001	All
GRP2_HUMAN	HP:0000001	All
GSC_HUMAN	HP:0000001	All
GT2D1_HUMAN	HP:0000001	All
GTF2I_HUMAN	HP:0000001	All
GTR3_HUMAN	HP:0000001	All
HACD1_HUMAN	HP:0000001	All
HCN1_HUMAN	HP:0000001	All
HDAC9_HUMAN	HP:0000001	All
HDBP1_HUMAN	HP:0000001	All
HERC2_HUMAN	HP:0000001	All
HIC1_HUMAN	HP:0000001	All
HMGB3_HUMAN	HP:0000001	All
HNRDL_HUMAN	HP:0000001	All
HOIL1_HUMAN	HP:0000001	All
I12R2_HUMAN	HP:0000001	All
IDHC_HUMAN	HP:0000001	All
IF4A3_HUMAN	HP:0000001	All
IFIH1_HUMAN	HP:0000001	All
IGF2_HUMAN	HP:0000001	All
IKKB_HUMAN	HP:0000001	All
IL10_HUMAN	HP:0000001	All
IL21_HUMAN	HP:0000001	All
IL23R_HUMAN	HP:0000001	All
IL6_HUMAN	HP:0000001	All
IMPG1_HUMAN	HP:0000001	All
ISK1_HUMAN	HP:0000001	All
ITA8_HUMAN	HP:0000001	All
JAGN1_HUMAN	HP:0000001	All
K2C6C_HUMAN	HP:0000001	All
KAPCA_HUMAN	HP:0000001	All
KCAB2_HUMAN	HP:0000001	All
KIF1C_HUMAN	HP:0000001	All
KIF4A_HUMAN	HP:0000001	All
KIZ_HUMAN	HP:0000001	All
KLH41_HUMAN	HP:0000001	All
KPTN_HUMAN	HP:0000001	All
LAMA1_HUMAN	HP:0000001	All
LCK_HUMAN	HP:0000001	All
LETM1_HUMAN	HP:0000001	All
LHX1_HUMAN	HP:0000001	All
LIMK1_HUMAN	HP:0000001	All
LIPS_HUMAN	HP:0000001	All
LRRF2_HUMAN	HP:0000001	All
LYRM4_HUMAN	HP:0000001	All
LZTL1_HUMAN	HP:0000001	All
MEIS2_HUMAN	HP:0000001	All
MK01_HUMAN	HP:0000001	All
MLX_HUMAN	HP:0000001	All
MOC2B_HUMAN	HP:0000001	All
MYB_HUMAN	HP:0000001	All
MYH14_HUMAN	HP:0000001	All
MYO15_HUMAN	HP:0000001	All
NAGAB_HUMAN	HP:0000001	All
NCKX4_HUMAN	HP:0000001	All
NELFA_HUMAN	HP:0000001	All
NEXN_HUMAN	HP:0000001	All
NSD2_HUMAN	HP:0000001	All
NU155_HUMAN	HP:0000001	All
NU4M_HUMAN	HP:0000001	All
OCLN_HUMAN	HP:0000001	All
P2RX2_HUMAN	HP:0000001	All
PAX1_HUMAN	HP:0000001	All
PCNA_HUMAN	HP:0000001	All
PCY1A_HUMAN	HP:0000001	All
PDE6D_HUMAN	HP:0000001	All
PEPD_HUMAN	HP:0000001	All
PF21A_HUMAN	HP:0000001	All
PGAP1_HUMAN	HP:0000001	All
PGAP3_HUMAN	HP:0000001	All
PK3CD_HUMAN	HP:0000001	All
PLPL6_HUMAN	HP:0000001	All
PMS1_HUMAN	HP:0000001	All
POC1B_HUMAN	HP:0000001	All
POTE1_HUMAN	HP:0000001	All
PPBT_HUMAN	HP:0000001	All
PPM1B_HUMAN	HP:0000001	All
PRLR_HUMAN	HP:0000001	All
PRP4_HUMAN	HP:0000001	All
PRTN3_HUMAN	HP:0000001	All
PTHD1_HUMAN	HP:0000001	All
PTN3_HUMAN	HP:0000001	All
PTPRF_HUMAN	HP:0000001	All
PTSS1_HUMAN	HP:0000001	All
PUF60_HUMAN	HP:0000001	All
PXDN_HUMAN	HP:0000001	All
REEP2_HUMAN	HP:0000001	All
RFC2_HUMAN	HP:0000001	All
RL15_HUMAN	HP:0000001	All
RS29_HUMAN	HP:0000001	All
RUBIC_HUMAN	HP:0000001	All
S13A5_HUMAN	HP:0000001	All
S35A3_HUMAN	HP:0000001	All
S39A5_HUMAN	HP:0000001	All
S7A14_HUMAN	HP:0000001	All
SALL2_HUMAN	HP:0000001	All
SCNAA_HUMAN	HP:0000001	All
SCNBA_HUMAN	HP:0000001	All
SEM5A_HUMAN	HP:0000001	All
SFXN4_HUMAN	HP:0000001	All
SH2B1_HUMAN	HP:0000001	All
SMCE1_HUMAN	HP:0000001	All
SNX3_HUMAN	HP:0000001	All
SOX11_HUMAN	HP:0000001	All
SPB7_HUMAN	HP:0000001	All
SPEG_HUMAN	HP:0000001	All
STAG3_HUMAN	HP:0000001	All
STING_HUMAN	HP:0000001	All
STT3A_HUMAN	HP:0000001	All
STT3B_HUMAN	HP:0000001	All
STX1A_HUMAN	HP:0000001	All
STX3_HUMAN	HP:0000001	All
SULF1_HUMAN	HP:0000001	All
SYCP3_HUMAN	HP:0000001	All
SYMM_HUMAN	HP:0000001	All
SYQ_HUMAN	HP:0000001	All
SYTM_HUMAN	HP:0000001	All
SYVM_HUMAN	HP:0000001	All
SZT2_HUMAN	HP:0000001	All
TACO1_HUMAN	HP:0000001	All
TAF2_HUMAN	HP:0000001	All
TAF4B_HUMAN	HP:0000001	All
TBB2A_HUMAN	HP:0000001	All
TBB5_HUMAN	HP:0000001	All
TBC20_HUMAN	HP:0000001	All
TBL2_HUMAN	HP:0000001	All
TBX2_HUMAN	HP:0000001	All
TBX6_HUMAN	HP:0000001	All
TECT3_HUMAN	HP:0000001	All
TECTA_HUMAN	HP:0000001	All
TFE2_HUMAN	HP:0000001	All
THTM_HUMAN	HP:0000001	All
TLR4_HUMAN	HP:0000001	All
TM10A_HUMAN	HP:0000001	All
TMM98_HUMAN	HP:0000001	All
TNPO3_HUMAN	HP:0000001	All
TNR27_HUMAN	HP:0000001	All
TPC_HUMAN	HP:0000001	All
TRIM1_HUMAN	HP:0000001	All
TUB_HUMAN	HP:0000001	All
USP9X_HUMAN	HP:0000001	All
VAMP1_HUMAN	HP:0000001	All
VAMP7_HUMAN	HP:0000001	All
VANG2_HUMAN	HP:0000001	All
VEGFC_HUMAN	HP:0000001	All
VPS53_HUMAN	HP:0000001	All
XYLT1_HUMAN	HP:0000001	All
YAP1_HUMAN	HP:0000001	All
ZBT20_HUMAN	HP:0000001	All
ZDHC9_HUMAN	HP:0000001	All
ZFP90_HUMAN	HP:0000001	All
ZP1_HUMAN	HP:0000001	All
1433E_HUMAN	HP:0000002	Abnormality of body height
ACHA7_HUMAN	HP:0000002	Abnormality of body height
ADNP_HUMAN	HP:0000002	Abnormality of body height
AGGF1_HUMAN	HP:0000002	Abnormality of body height
ATP8_HUMAN	HP:0000002	Abnormality of body height
ATRIP_HUMAN	HP:0000002	Abnormality of body height
BAZ1B_HUMAN	HP:0000002	Abnormality of body height
CHIP_HUMAN	HP:0000002	Abnormality of body height
CLIP2_HUMAN	HP:0000002	Abnormality of body height
CNTN4_HUMAN	HP:0000002	Abnormality of body height
CORA1_HUMAN	HP:0000002	Abnormality of body height
COX2_HUMAN	HP:0000002	Abnormality of body height
CRKL_HUMAN	HP:0000002	Abnormality of body height
DPP6_HUMAN	HP:0000002	Abnormality of body height
ECHP_HUMAN	HP:0000002	Abnormality of body height
FLII_HUMAN	HP:0000002	Abnormality of body height
GBRD_HUMAN	HP:0000002	Abnormality of body height
GMPPA_HUMAN	HP:0000002	Abnormality of body height
GPC4_HUMAN	HP:0000002	Abnormality of body height
GSC_HUMAN	HP:0000002	Abnormality of body height
GT2D1_HUMAN	HP:0000002	Abnormality of body height
GTF2I_HUMAN	HP:0000002	Abnormality of body height
HMGB3_HUMAN	HP:0000002	Abnormality of body height
IDHC_HUMAN	HP:0000002	Abnormality of body height
IF4A3_HUMAN	HP:0000002	Abnormality of body height
JAGN1_HUMAN	HP:0000002	Abnormality of body height
KCAB2_HUMAN	HP:0000002	Abnormality of body height
LETM1_HUMAN	HP:0000002	Abnormality of body height
LHX1_HUMAN	HP:0000002	Abnormality of body height
LIMK1_HUMAN	HP:0000002	Abnormality of body height
LZTL1_HUMAN	HP:0000002	Abnormality of body height
MEIS2_HUMAN	HP:0000002	Abnormality of body height
MK01_HUMAN	HP:0000002	Abnormality of body height
NELFA_HUMAN	HP:0000002	Abnormality of body height
NSD2_HUMAN	HP:0000002	Abnormality of body height
NU4M_HUMAN	HP:0000002	Abnormality of body height
PAX1_HUMAN	HP:0000002	Abnormality of body height
PCY1A_HUMAN	HP:0000002	Abnormality of body height
PLPL6_HUMAN	HP:0000002	Abnormality of body height
PPBT_HUMAN	HP:0000002	Abnormality of body height
PTSS1_HUMAN	HP:0000002	Abnormality of body height
PUF60_HUMAN	HP:0000002	Abnormality of body height
RFC2_HUMAN	HP:0000002	Abnormality of body height
RL15_HUMAN	HP:0000002	Abnormality of body height
RS29_HUMAN	HP:0000002	Abnormality of body height
SEM5A_HUMAN	HP:0000002	Abnormality of body height
SMCE1_HUMAN	HP:0000002	Abnormality of body height
SOX11_HUMAN	HP:0000002	Abnormality of body height
SULF1_HUMAN	HP:0000002	Abnormality of body height
TBC20_HUMAN	HP:0000002	Abnormality of body height
TBL2_HUMAN	HP:0000002	Abnormality of body height
TBX2_HUMAN	HP:0000002	Abnormality of body height
TBX6_HUMAN	HP:0000002	Abnormality of body height
TECT3_HUMAN	HP:0000002	Abnormality of body height
THTM_HUMAN	HP:0000002	Abnormality of body height
TM10A_HUMAN	HP:0000002	Abnormality of body height
USP9X_HUMAN	HP:0000002	Abnormality of body height
VPS53_HUMAN	HP:0000002	Abnormality of body height
XYLT1_HUMAN	HP:0000002	Abnormality of body height
ZBT20_HUMAN	HP:0000002	Abnormality of body height
ZDHC9_HUMAN	HP:0000002	Abnormality of body height
AGGF1_HUMAN	HP:0000008	Abnormal morphology of female internal genitalia
BAZ1B_HUMAN	HP:0000008	Abnormal morphology of female internal genitalia
CLIP2_HUMAN	HP:0000008	Abnormal morphology of female internal genitalia
ESR1_HUMAN	HP:0000008	Abnormal morphology of female internal genitalia
FGF20_HUMAN	HP:0000008	Abnormal morphology of female internal genitalia
FIBG_HUMAN	HP:0000008	Abnormal morphology of female internal genitalia
GFI1B_HUMAN	HP:0000008	Abnormal morphology of female internal genitalia
GT2D1_HUMAN	HP:0000008	Abnormal morphology of female internal genitalia
GTF2I_HUMAN	HP:0000008	Abnormal morphology of female internal genitalia
IDHC_HUMAN	HP:0000008	Abnormal morphology of female internal genitalia
ITA8_HUMAN	HP:0000008	Abnormal morphology of female internal genitalia
LHX1_HUMAN	HP:0000008	Abnormal morphology of female internal genitalia
LIMK1_HUMAN	HP:0000008	Abnormal morphology of female internal genitalia
LRRF2_HUMAN	HP:0000008	Abnormal morphology of female internal genitalia
LZTL1_HUMAN	HP:0000008	Abnormal morphology of female internal genitalia
PMS1_HUMAN	HP:0000008	Abnormal morphology of female internal genitalia
PRLR_HUMAN	HP:0000008	Abnormal morphology of female internal genitalia
RFC2_HUMAN	HP:0000008	Abnormal morphology of female internal genitalia
STAG3_HUMAN	HP:0000008	Abnormal morphology of female internal genitalia
TBL2_HUMAN	HP:0000008	Abnormal morphology of female internal genitalia
TBX6_HUMAN	HP:0000008	Abnormal morphology of female internal genitalia
TM10A_HUMAN	HP:0000008	Abnormal morphology of female internal genitalia
VAMP7_HUMAN	HP:0000008	Abnormal morphology of female internal genitalia
ACTH_HUMAN	HP:0000009	Functional abnormality of the bladder
ARNT2_HUMAN	HP:0000009	Functional abnormality of the bladder
BAZ1B_HUMAN	HP:0000009	Functional abnormality of the bladder
CLIP2_HUMAN	HP:0000009	Functional abnormality of the bladder
CRKL_HUMAN	HP:0000009	Functional abnormality of the bladder
GT2D1_HUMAN	HP:0000009	Functional abnormality of the bladder
GTF2I_HUMAN	HP:0000009	Functional abnormality of the bladder
LIMK1_HUMAN	HP:0000009	Functional abnormality of the bladder
LRRF2_HUMAN	HP:0000009	Functional abnormality of the bladder
MK01_HUMAN	HP:0000009	Functional abnormality of the bladder
PEPD_HUMAN	HP:0000009	Functional abnormality of the bladder
PMS1_HUMAN	HP:0000009	Functional abnormality of the bladder
REEP2_HUMAN	HP:0000009	Functional abnormality of the bladder
RFC2_HUMAN	HP:0000009	Functional abnormality of the bladder
SYMM_HUMAN	HP:0000009	Functional abnormality of the bladder
TBL2_HUMAN	HP:0000009	Functional abnormality of the bladder
VANG2_HUMAN	HP:0000009	Functional abnormality of the bladder
BAZ1B_HUMAN	HP:0000010	Recurrent urinary tract infections
CLIP2_HUMAN	HP:0000010	Recurrent urinary tract infections
CRKL_HUMAN	HP:0000010	Recurrent urinary tract infections
GT2D1_HUMAN	HP:0000010	Recurrent urinary tract infections
GTF2I_HUMAN	HP:0000010	Recurrent urinary tract infections
LIMK1_HUMAN	HP:0000010	Recurrent urinary tract infections
LRRF2_HUMAN	HP:0000010	Recurrent urinary tract infections
MK01_HUMAN	HP:0000010	Recurrent urinary tract infections
PMS1_HUMAN	HP:0000010	Recurrent urinary tract infections
RFC2_HUMAN	HP:0000010	Recurrent urinary tract infections
TBL2_HUMAN	HP:0000010	Recurrent urinary tract infections
ACTH_HUMAN	HP:0000014	Abnormality of the bladder
ARNT2_HUMAN	HP:0000014	Abnormality of the bladder
BAZ1B_HUMAN	HP:0000014	Abnormality of the bladder
CLIP2_HUMAN	HP:0000014	Abnormality of the bladder
CRKL_HUMAN	HP:0000014	Abnormality of the bladder
GT2D1_HUMAN	HP:0000014	Abnormality of the bladder
GTF2I_HUMAN	HP:0000014	Abnormality of the bladder
LIMK1_HUMAN	HP:0000014	Abnormality of the bladder
LRRF2_HUMAN	HP:0000014	Abnormality of the bladder
MK01_HUMAN	HP:0000014	Abnormality of the bladder
PEPD_HUMAN	HP:0000014	Abnormality of the bladder
PMS1_HUMAN	HP:0000014	Abnormality of the bladder
REEP2_HUMAN	HP:0000014	Abnormality of the bladder
RFC2_HUMAN	HP:0000014	Abnormality of the bladder
SYMM_HUMAN	HP:0000014	Abnormality of the bladder
TBL2_HUMAN	HP:0000014	Abnormality of the bladder
VANG2_HUMAN	HP:0000014	Abnormality of the bladder
ACTH_HUMAN	HP:0000022	Abnormality of male internal genitalia
ARNT2_HUMAN	HP:0000022	Abnormality of male internal genitalia
BAZ1B_HUMAN	HP:0000022	Abnormality of male internal genitalia
CH037_HUMAN	HP:0000022	Abnormality of male internal genitalia
CLIP2_HUMAN	HP:0000022	Abnormality of male internal genitalia
CLP1_HUMAN	HP:0000022	Abnormality of male internal genitalia
CNTN4_HUMAN	HP:0000022	Abnormality of male internal genitalia
CO4A_HUMAN	HP:0000022	Abnormality of male internal genitalia
CTLA4_HUMAN	HP:0000022	Abnormality of male internal genitalia
DHDDS_HUMAN	HP:0000022	Abnormality of male internal genitalia
DPB1_HUMAN	HP:0000022	Abnormality of male internal genitalia
DPOD1_HUMAN	HP:0000022	Abnormality of male internal genitalia
EYS_HUMAN	HP:0000022	Abnormality of male internal genitalia
FAT4_HUMAN	HP:0000022	Abnormality of male internal genitalia
FNBP4_HUMAN	HP:0000022	Abnormality of male internal genitalia
GATA5_HUMAN	HP:0000022	Abnormality of male internal genitalia
GBRD_HUMAN	HP:0000022	Abnormality of male internal genitalia
GPC4_HUMAN	HP:0000022	Abnormality of male internal genitalia
GSC_HUMAN	HP:0000022	Abnormality of male internal genitalia
GT2D1_HUMAN	HP:0000022	Abnormality of male internal genitalia
GTF2I_HUMAN	HP:0000022	Abnormality of male internal genitalia
I12R2_HUMAN	HP:0000022	Abnormality of male internal genitalia
IGF2_HUMAN	HP:0000022	Abnormality of male internal genitalia
IL10_HUMAN	HP:0000022	Abnormality of male internal genitalia
IL23R_HUMAN	HP:0000022	Abnormality of male internal genitalia
KCAB2_HUMAN	HP:0000022	Abnormality of male internal genitalia
KIZ_HUMAN	HP:0000022	Abnormality of male internal genitalia
LETM1_HUMAN	HP:0000022	Abnormality of male internal genitalia
LHX1_HUMAN	HP:0000022	Abnormality of male internal genitalia
LIMK1_HUMAN	HP:0000022	Abnormality of male internal genitalia
LZTL1_HUMAN	HP:0000022	Abnormality of male internal genitalia
NELFA_HUMAN	HP:0000022	Abnormality of male internal genitalia
NSD2_HUMAN	HP:0000022	Abnormality of male internal genitalia
PDE6D_HUMAN	HP:0000022	Abnormality of male internal genitalia
PRP4_HUMAN	HP:0000022	Abnormality of male internal genitalia
PRTN3_HUMAN	HP:0000022	Abnormality of male internal genitalia
PTSS1_HUMAN	HP:0000022	Abnormality of male internal genitalia
RFC2_HUMAN	HP:0000022	Abnormality of male internal genitalia
S7A14_HUMAN	HP:0000022	Abnormality of male internal genitalia
SMCE1_HUMAN	HP:0000022	Abnormality of male internal genitalia
SNX3_HUMAN	HP:0000022	Abnormality of male internal genitalia
SOX11_HUMAN	HP:0000022	Abnormality of male internal genitalia
STT3B_HUMAN	HP:0000022	Abnormality of male internal genitalia
TBC20_HUMAN	HP:0000022	Abnormality of male internal genitalia
TBL2_HUMAN	HP:0000022	Abnormality of male internal genitalia
TECT3_HUMAN	HP:0000022	Abnormality of male internal genitalia
TLR4_HUMAN	HP:0000022	Abnormality of male internal genitalia
TUB_HUMAN	HP:0000022	Abnormality of male internal genitalia
VAMP7_HUMAN	HP:0000022	Abnormality of male internal genitalia
ZBT20_HUMAN	HP:0000022	Abnormality of male internal genitalia
ZDHC9_HUMAN	HP:0000022	Abnormality of male internal genitalia
BAZ1B_HUMAN	HP:0000025	Functional abnormality of male internal genitalia
CLIP2_HUMAN	HP:0000025	Functional abnormality of male internal genitalia
CTSR2_HUMAN	HP:0000025	Functional abnormality of male internal genitalia
GT2D1_HUMAN	HP:0000025	Functional abnormality of male internal genitalia
GTF2I_HUMAN	HP:0000025	Functional abnormality of male internal genitalia
LIMK1_HUMAN	HP:0000025	Functional abnormality of male internal genitalia
RFC2_HUMAN	HP:0000025	Functional abnormality of male internal genitalia
SYCP3_HUMAN	HP:0000025	Functional abnormality of male internal genitalia
TAF4B_HUMAN	HP:0000025	Functional abnormality of male internal genitalia
TBL2_HUMAN	HP:0000025	Functional abnormality of male internal genitalia
ACTH_HUMAN	HP:0000028	Cryptorchidism
ARNT2_HUMAN	HP:0000028	Cryptorchidism
BAZ1B_HUMAN	HP:0000028	Cryptorchidism
CLIP2_HUMAN	HP:0000028	Cryptorchidism
CLP1_HUMAN	HP:0000028	Cryptorchidism
CNTN4_HUMAN	HP:0000028	Cryptorchidism
DPOD1_HUMAN	HP:0000028	Cryptorchidism
FAT4_HUMAN	HP:0000028	Cryptorchidism
FNBP4_HUMAN	HP:0000028	Cryptorchidism
GATA5_HUMAN	HP:0000028	Cryptorchidism
GBRD_HUMAN	HP:0000028	Cryptorchidism
GPC4_HUMAN	HP:0000028	Cryptorchidism
GSC_HUMAN	HP:0000028	Cryptorchidism
GT2D1_HUMAN	HP:0000028	Cryptorchidism
GTF2I_HUMAN	HP:0000028	Cryptorchidism
IGF2_HUMAN	HP:0000028	Cryptorchidism
KCAB2_HUMAN	HP:0000028	Cryptorchidism
LETM1_HUMAN	HP:0000028	Cryptorchidism
LHX1_HUMAN	HP:0000028	Cryptorchidism
LIMK1_HUMAN	HP:0000028	Cryptorchidism
LZTL1_HUMAN	HP:0000028	Cryptorchidism
NELFA_HUMAN	HP:0000028	Cryptorchidism
NSD2_HUMAN	HP:0000028	Cryptorchidism
PDE6D_HUMAN	HP:0000028	Cryptorchidism
PTSS1_HUMAN	HP:0000028	Cryptorchidism
RFC2_HUMAN	HP:0000028	Cryptorchidism
SMCE1_HUMAN	HP:0000028	Cryptorchidism
SNX3_HUMAN	HP:0000028	Cryptorchidism
SOX11_HUMAN	HP:0000028	Cryptorchidism
STT3B_HUMAN	HP:0000028	Cryptorchidism
TBC20_HUMAN	HP:0000028	Cryptorchidism
TBL2_HUMAN	HP:0000028	Cryptorchidism
TECT3_HUMAN	HP:0000028	Cryptorchidism
ZBT20_HUMAN	HP:0000028	Cryptorchidism
1433E_HUMAN	HP:0000032	Abnormality of male external genitalia
ACTH_HUMAN	HP:0000032	Abnormality of male external genitalia
ARNT2_HUMAN	HP:0000032	Abnormality of male external genitalia
BAZ1B_HUMAN	HP:0000032	Abnormality of male external genitalia
C2CD3_HUMAN	HP:0000032	Abnormality of male external genitalia
CH037_HUMAN	HP:0000032	Abnormality of male external genitalia
CLIP2_HUMAN	HP:0000032	Abnormality of male external genitalia
CLP1_HUMAN	HP:0000032	Abnormality of male external genitalia
CNTN4_HUMAN	HP:0000032	Abnormality of male external genitalia
DHDDS_HUMAN	HP:0000032	Abnormality of male external genitalia
DPOD1_HUMAN	HP:0000032	Abnormality of male external genitalia
EYS_HUMAN	HP:0000032	Abnormality of male external genitalia
FAT4_HUMAN	HP:0000032	Abnormality of male external genitalia
FNBP4_HUMAN	HP:0000032	Abnormality of male external genitalia
GATA5_HUMAN	HP:0000032	Abnormality of male external genitalia
GBRD_HUMAN	HP:0000032	Abnormality of male external genitalia
GPC4_HUMAN	HP:0000032	Abnormality of male external genitalia
GSC_HUMAN	HP:0000032	Abnormality of male external genitalia
GT2D1_HUMAN	HP:0000032	Abnormality of male external genitalia
GTF2I_HUMAN	HP:0000032	Abnormality of male external genitalia
IGF2_HUMAN	HP:0000032	Abnormality of male external genitalia
KCAB2_HUMAN	HP:0000032	Abnormality of male external genitalia
KIZ_HUMAN	HP:0000032	Abnormality of male external genitalia
LETM1_HUMAN	HP:0000032	Abnormality of male external genitalia
LHX1_HUMAN	HP:0000032	Abnormality of male external genitalia
LIMK1_HUMAN	HP:0000032	Abnormality of male external genitalia
LZTL1_HUMAN	HP:0000032	Abnormality of male external genitalia
NELFA_HUMAN	HP:0000032	Abnormality of male external genitalia
NSD2_HUMAN	HP:0000032	Abnormality of male external genitalia
PDE6D_HUMAN	HP:0000032	Abnormality of male external genitalia
PRP4_HUMAN	HP:0000032	Abnormality of male external genitalia
PTSS1_HUMAN	HP:0000032	Abnormality of male external genitalia
RFC2_HUMAN	HP:0000032	Abnormality of male external genitalia
S7A14_HUMAN	HP:0000032	Abnormality of male external genitalia
SMCE1_HUMAN	HP:0000032	Abnormality of male external genitalia
SNX3_HUMAN	HP:0000032	Abnormality of male external genitalia
SOX11_HUMAN	HP:0000032	Abnormality of male external genitalia
STT3B_HUMAN	HP:0000032	Abnormality of male external genitalia
TBC20_HUMAN	HP:0000032	Abnormality of male external genitalia
TBL2_HUMAN	HP:0000032	Abnormality of male external genitalia
TBX2_HUMAN	HP:0000032	Abnormality of male external genitalia
TECT3_HUMAN	HP:0000032	Abnormality of male external genitalia
TUB_HUMAN	HP:0000032	Abnormality of male external genitalia
VAMP7_HUMAN	HP:0000032	Abnormality of male external genitalia
ZBT20_HUMAN	HP:0000032	Abnormality of male external genitalia
ACTH_HUMAN	HP:0000035	Abnormal testis morphology
ARNT2_HUMAN	HP:0000035	Abnormal testis morphology
BAZ1B_HUMAN	HP:0000035	Abnormal testis morphology
CH037_HUMAN	HP:0000035	Abnormal testis morphology
CLIP2_HUMAN	HP:0000035	Abnormal testis morphology
CLP1_HUMAN	HP:0000035	Abnormal testis morphology
CNTN4_HUMAN	HP:0000035	Abnormal testis morphology
CO4A_HUMAN	HP:0000035	Abnormal testis morphology
DHDDS_HUMAN	HP:0000035	Abnormal testis morphology
DPOD1_HUMAN	HP:0000035	Abnormal testis morphology
EYS_HUMAN	HP:0000035	Abnormal testis morphology
FAT4_HUMAN	HP:0000035	Abnormal testis morphology
FNBP4_HUMAN	HP:0000035	Abnormal testis morphology
GATA5_HUMAN	HP:0000035	Abnormal testis morphology
GBRD_HUMAN	HP:0000035	Abnormal testis morphology
GPC4_HUMAN	HP:0000035	Abnormal testis morphology
GSC_HUMAN	HP:0000035	Abnormal testis morphology
GT2D1_HUMAN	HP:0000035	Abnormal testis morphology
GTF2I_HUMAN	HP:0000035	Abnormal testis morphology
I12R2_HUMAN	HP:0000035	Abnormal testis morphology
IGF2_HUMAN	HP:0000035	Abnormal testis morphology
IL10_HUMAN	HP:0000035	Abnormal testis morphology
IL23R_HUMAN	HP:0000035	Abnormal testis morphology
KCAB2_HUMAN	HP:0000035	Abnormal testis morphology
KIZ_HUMAN	HP:0000035	Abnormal testis morphology
LETM1_HUMAN	HP:0000035	Abnormal testis morphology
LHX1_HUMAN	HP:0000035	Abnormal testis morphology
LIMK1_HUMAN	HP:0000035	Abnormal testis morphology
LZTL1_HUMAN	HP:0000035	Abnormal testis morphology
NELFA_HUMAN	HP:0000035	Abnormal testis morphology
NSD2_HUMAN	HP:0000035	Abnormal testis morphology
PDE6D_HUMAN	HP:0000035	Abnormal testis morphology
PRP4_HUMAN	HP:0000035	Abnormal testis morphology
PTSS1_HUMAN	HP:0000035	Abnormal testis morphology
RFC2_HUMAN	HP:0000035	Abnormal testis morphology
S7A14_HUMAN	HP:0000035	Abnormal testis morphology
SMCE1_HUMAN	HP:0000035	Abnormal testis morphology
SNX3_HUMAN	HP:0000035	Abnormal testis morphology
SOX11_HUMAN	HP:0000035	Abnormal testis morphology
STT3B_HUMAN	HP:0000035	Abnormal testis morphology
TBC20_HUMAN	HP:0000035	Abnormal testis morphology
TBL2_HUMAN	HP:0000035	Abnormal testis morphology
TECT3_HUMAN	HP:0000035	Abnormal testis morphology
TLR4_HUMAN	HP:0000035	Abnormal testis morphology
TUB_HUMAN	HP:0000035	Abnormal testis morphology
VAMP7_HUMAN	HP:0000035	Abnormal testis morphology
ZBT20_HUMAN	HP:0000035	Abnormal testis morphology
ZDHC9_HUMAN	HP:0000035	Abnormal testis morphology
1433E_HUMAN	HP:0000036	Abnormal penis morphology
BAZ1B_HUMAN	HP:0000036	Abnormal penis morphology
C2CD3_HUMAN	HP:0000036	Abnormal penis morphology
CH037_HUMAN	HP:0000036	Abnormal penis morphology
CLIP2_HUMAN	HP:0000036	Abnormal penis morphology
DHDDS_HUMAN	HP:0000036	Abnormal penis morphology
EYS_HUMAN	HP:0000036	Abnormal penis morphology
FAT4_HUMAN	HP:0000036	Abnormal penis morphology
GBRD_HUMAN	HP:0000036	Abnormal penis morphology
GPC4_HUMAN	HP:0000036	Abnormal penis morphology
GT2D1_HUMAN	HP:0000036	Abnormal penis morphology
GTF2I_HUMAN	HP:0000036	Abnormal penis morphology
KCAB2_HUMAN	HP:0000036	Abnormal penis morphology
KIZ_HUMAN	HP:0000036	Abnormal penis morphology
LETM1_HUMAN	HP:0000036	Abnormal penis morphology
LIMK1_HUMAN	HP:0000036	Abnormal penis morphology
LZTL1_HUMAN	HP:0000036	Abnormal penis morphology
NELFA_HUMAN	HP:0000036	Abnormal penis morphology
NSD2_HUMAN	HP:0000036	Abnormal penis morphology
PRP4_HUMAN	HP:0000036	Abnormal penis morphology
PTSS1_HUMAN	HP:0000036	Abnormal penis morphology
RFC2_HUMAN	HP:0000036	Abnormal penis morphology
S7A14_HUMAN	HP:0000036	Abnormal penis morphology
STT3B_HUMAN	HP:0000036	Abnormal penis morphology
TBC20_HUMAN	HP:0000036	Abnormal penis morphology
TBL2_HUMAN	HP:0000036	Abnormal penis morphology
TUB_HUMAN	HP:0000036	Abnormal penis morphology
VAMP7_HUMAN	HP:0000036	Abnormal penis morphology
1433E_HUMAN	HP:0000050	Hypoplastic male external genitalia
BAZ1B_HUMAN	HP:0000050	Hypoplastic male external genitalia
C2CD3_HUMAN	HP:0000050	Hypoplastic male external genitalia
CH037_HUMAN	HP:0000050	Hypoplastic male external genitalia
CLIP2_HUMAN	HP:0000050	Hypoplastic male external genitalia
DHDDS_HUMAN	HP:0000050	Hypoplastic male external genitalia
EYS_HUMAN	HP:0000050	Hypoplastic male external genitalia
FAT4_HUMAN	HP:0000050	Hypoplastic male external genitalia
GBRD_HUMAN	HP:0000050	Hypoplastic male external genitalia
GPC4_HUMAN	HP:0000050	Hypoplastic male external genitalia
GT2D1_HUMAN	HP:0000050	Hypoplastic male external genitalia
GTF2I_HUMAN	HP:0000050	Hypoplastic male external genitalia
KCAB2_HUMAN	HP:0000050	Hypoplastic male external genitalia
KIZ_HUMAN	HP:0000050	Hypoplastic male external genitalia
LIMK1_HUMAN	HP:0000050	Hypoplastic male external genitalia
LZTL1_HUMAN	HP:0000050	Hypoplastic male external genitalia
PRP4_HUMAN	HP:0000050	Hypoplastic male external genitalia
RFC2_HUMAN	HP:0000050	Hypoplastic male external genitalia
S7A14_HUMAN	HP:0000050	Hypoplastic male external genitalia
STT3B_HUMAN	HP:0000050	Hypoplastic male external genitalia
TBC20_HUMAN	HP:0000050	Hypoplastic male external genitalia
TBL2_HUMAN	HP:0000050	Hypoplastic male external genitalia
TUB_HUMAN	HP:0000050	Hypoplastic male external genitalia
VAMP7_HUMAN	HP:0000050	Hypoplastic male external genitalia
ACTH_HUMAN	HP:0000069	Abnormality of the ureter
ARNT2_HUMAN	HP:0000069	Abnormality of the ureter
BAZ1B_HUMAN	HP:0000069	Abnormality of the ureter
CLIP2_HUMAN	HP:0000069	Abnormality of the ureter
CTLA4_HUMAN	HP:0000069	Abnormality of the ureter
DPB1_HUMAN	HP:0000069	Abnormality of the ureter
FLII_HUMAN	HP:0000069	Abnormality of the ureter
GPC4_HUMAN	HP:0000069	Abnormality of the ureter
GT2D1_HUMAN	HP:0000069	Abnormality of the ureter
GTF2I_HUMAN	HP:0000069	Abnormality of the ureter
LHX1_HUMAN	HP:0000069	Abnormality of the ureter
LIMK1_HUMAN	HP:0000069	Abnormality of the ureter
PRTN3_HUMAN	HP:0000069	Abnormality of the ureter
RFC2_HUMAN	HP:0000069	Abnormality of the ureter
TBL2_HUMAN	HP:0000069	Abnormality of the ureter
THTM_HUMAN	HP:0000069	Abnormality of the ureter
1433E_HUMAN	HP:0000077	Abnormality of the kidney
ACTH_HUMAN	HP:0000077	Abnormality of the kidney
AGGF1_HUMAN	HP:0000077	Abnormality of the kidney
AGM1_HUMAN	HP:0000077	Abnormality of the kidney
AMMR1_HUMAN	HP:0000077	Abnormality of the kidney
ARNT2_HUMAN	HP:0000077	Abnormality of the kidney
BAZ1B_HUMAN	HP:0000077	Abnormality of the kidney
CCND2_HUMAN	HP:0000077	Abnormality of the kidney
CLIP2_HUMAN	HP:0000077	Abnormality of the kidney
CO4A_HUMAN	HP:0000077	Abnormality of the kidney
COX2_HUMAN	HP:0000077	Abnormality of the kidney
CSPP1_HUMAN	HP:0000077	Abnormality of the kidney
CTLA4_HUMAN	HP:0000077	Abnormality of the kidney
DPB1_HUMAN	HP:0000077	Abnormality of the kidney
FAT4_HUMAN	HP:0000077	Abnormality of the kidney
FGF20_HUMAN	HP:0000077	Abnormality of the kidney
FLII_HUMAN	HP:0000077	Abnormality of the kidney
FNBP4_HUMAN	HP:0000077	Abnormality of the kidney
GBRD_HUMAN	HP:0000077	Abnormality of the kidney
GPC4_HUMAN	HP:0000077	Abnormality of the kidney
GT2D1_HUMAN	HP:0000077	Abnormality of the kidney
GTF2I_HUMAN	HP:0000077	Abnormality of the kidney
HIC1_HUMAN	HP:0000077	Abnormality of the kidney
I12R2_HUMAN	HP:0000077	Abnormality of the kidney
IFIH1_HUMAN	HP:0000077	Abnormality of the kidney
IGF2_HUMAN	HP:0000077	Abnormality of the kidney
IL10_HUMAN	HP:0000077	Abnormality of the kidney
IL23R_HUMAN	HP:0000077	Abnormality of the kidney
ITA8_HUMAN	HP:0000077	Abnormality of the kidney
KCAB2_HUMAN	HP:0000077	Abnormality of the kidney
LETM1_HUMAN	HP:0000077	Abnormality of the kidney
LHX1_HUMAN	HP:0000077	Abnormality of the kidney
LIMK1_HUMAN	HP:0000077	Abnormality of the kidney
LRRF2_HUMAN	HP:0000077	Abnormality of the kidney
LZTL1_HUMAN	HP:0000077	Abnormality of the kidney
MOC2B_HUMAN	HP:0000077	Abnormality of the kidney
NELFA_HUMAN	HP:0000077	Abnormality of the kidney
NSD2_HUMAN	HP:0000077	Abnormality of the kidney
NU4M_HUMAN	HP:0000077	Abnormality of the kidney
PAX1_HUMAN	HP:0000077	Abnormality of the kidney
PDE6D_HUMAN	HP:0000077	Abnormality of the kidney
PMS1_HUMAN	HP:0000077	Abnormality of the kidney
PPBT_HUMAN	HP:0000077	Abnormality of the kidney
PPM1B_HUMAN	HP:0000077	Abnormality of the kidney
PRTN3_HUMAN	HP:0000077	Abnormality of the kidney
PUF60_HUMAN	HP:0000077	Abnormality of the kidney
RFC2_HUMAN	HP:0000077	Abnormality of the kidney
SMCE1_HUMAN	HP:0000077	Abnormality of the kidney
SOX11_HUMAN	HP:0000077	Abnormality of the kidney
TBC20_HUMAN	HP:0000077	Abnormality of the kidney
TBL2_HUMAN	HP:0000077	Abnormality of the kidney
TBX6_HUMAN	HP:0000077	Abnormality of the kidney
TECT3_HUMAN	HP:0000077	Abnormality of the kidney
TLR4_HUMAN	HP:0000077	Abnormality of the kidney
YAP1_HUMAN	HP:0000077	Abnormality of the kidney
1433E_HUMAN	HP:0000078	Abnormality of the genital system
ACTH_HUMAN	HP:0000078	Abnormality of the genital system
AGGF1_HUMAN	HP:0000078	Abnormality of the genital system
ARNT2_HUMAN	HP:0000078	Abnormality of the genital system
BAZ1B_HUMAN	HP:0000078	Abnormality of the genital system
C2CD3_HUMAN	HP:0000078	Abnormality of the genital system
CCNO_HUMAN	HP:0000078	Abnormality of the genital system
CH037_HUMAN	HP:0000078	Abnormality of the genital system
CHIP_HUMAN	HP:0000078	Abnormality of the genital system
CLIP2_HUMAN	HP:0000078	Abnormality of the genital system
CLP1_HUMAN	HP:0000078	Abnormality of the genital system
CNTN4_HUMAN	HP:0000078	Abnormality of the genital system
CO4A_HUMAN	HP:0000078	Abnormality of the genital system
COX2_HUMAN	HP:0000078	Abnormality of the genital system
CTLA4_HUMAN	HP:0000078	Abnormality of the genital system
CTSR2_HUMAN	HP:0000078	Abnormality of the genital system
DHDDS_HUMAN	HP:0000078	Abnormality of the genital system
DPB1_HUMAN	HP:0000078	Abnormality of the genital system
DPOD1_HUMAN	HP:0000078	Abnormality of the genital system
ESR1_HUMAN	HP:0000078	Abnormality of the genital system
EYS_HUMAN	HP:0000078	Abnormality of the genital system
FAT4_HUMAN	HP:0000078	Abnormality of the genital system
FGF20_HUMAN	HP:0000078	Abnormality of the genital system
FIBG_HUMAN	HP:0000078	Abnormality of the genital system
FLII_HUMAN	HP:0000078	Abnormality of the genital system
FNBP4_HUMAN	HP:0000078	Abnormality of the genital system
GATA5_HUMAN	HP:0000078	Abnormality of the genital system
GBRD_HUMAN	HP:0000078	Abnormality of the genital system
GFI1B_HUMAN	HP:0000078	Abnormality of the genital system
GPC4_HUMAN	HP:0000078	Abnormality of the genital system
GSC_HUMAN	HP:0000078	Abnormality of the genital system
GT2D1_HUMAN	HP:0000078	Abnormality of the genital system
GTF2I_HUMAN	HP:0000078	Abnormality of the genital system
I12R2_HUMAN	HP:0000078	Abnormality of the genital system
IDHC_HUMAN	HP:0000078	Abnormality of the genital system
IGF2_HUMAN	HP:0000078	Abnormality of the genital system
IL10_HUMAN	HP:0000078	Abnormality of the genital system
IL23R_HUMAN	HP:0000078	Abnormality of the genital system
ITA8_HUMAN	HP:0000078	Abnormality of the genital system
KCAB2_HUMAN	HP:0000078	Abnormality of the genital system
KIZ_HUMAN	HP:0000078	Abnormality of the genital system
LETM1_HUMAN	HP:0000078	Abnormality of the genital system
LHX1_HUMAN	HP:0000078	Abnormality of the genital system
LIMK1_HUMAN	HP:0000078	Abnormality of the genital system
LRRF2_HUMAN	HP:0000078	Abnormality of the genital system
LZTL1_HUMAN	HP:0000078	Abnormality of the genital system
NELFA_HUMAN	HP:0000078	Abnormality of the genital system
NSD2_HUMAN	HP:0000078	Abnormality of the genital system
NU4M_HUMAN	HP:0000078	Abnormality of the genital system
PDE6D_HUMAN	HP:0000078	Abnormality of the genital system
PLPL6_HUMAN	HP:0000078	Abnormality of the genital system
PMS1_HUMAN	HP:0000078	Abnormality of the genital system
PPM1B_HUMAN	HP:0000078	Abnormality of the genital system
PRLR_HUMAN	HP:0000078	Abnormality of the genital system
PRP4_HUMAN	HP:0000078	Abnormality of the genital system
PRTN3_HUMAN	HP:0000078	Abnormality of the genital system
PTSS1_HUMAN	HP:0000078	Abnormality of the genital system
RFC2_HUMAN	HP:0000078	Abnormality of the genital system
RL15_HUMAN	HP:0000078	Abnormality of the genital system
RS29_HUMAN	HP:0000078	Abnormality of the genital system
S7A14_HUMAN	HP:0000078	Abnormality of the genital system
SMCE1_HUMAN	HP:0000078	Abnormality of the genital system
SNX3_HUMAN	HP:0000078	Abnormality of the genital system
SOX11_HUMAN	HP:0000078	Abnormality of the genital system
STAG3_HUMAN	HP:0000078	Abnormality of the genital system
STT3B_HUMAN	HP:0000078	Abnormality of the genital system
SYCP3_HUMAN	HP:0000078	Abnormality of the genital system
TAF4B_HUMAN	HP:0000078	Abnormality of the genital system
TBC20_HUMAN	HP:0000078	Abnormality of the genital system
TBL2_HUMAN	HP:0000078	Abnormality of the genital system
TBX2_HUMAN	HP:0000078	Abnormality of the genital system
TBX6_HUMAN	HP:0000078	Abnormality of the genital system
TECT3_HUMAN	HP:0000078	Abnormality of the genital system
TLR4_HUMAN	HP:0000078	Abnormality of the genital system
TM10A_HUMAN	HP:0000078	Abnormality of the genital system
TUB_HUMAN	HP:0000078	Abnormality of the genital system
VAMP7_HUMAN	HP:0000078	Abnormality of the genital system
ZBT20_HUMAN	HP:0000078	Abnormality of the genital system
ZDHC9_HUMAN	HP:0000078	Abnormality of the genital system
ZP1_HUMAN	HP:0000078	Abnormality of the genital system
1433E_HUMAN	HP:0000079	Abnormality of the urinary system
ACTH_HUMAN	HP:0000079	Abnormality of the urinary system
AGGF1_HUMAN	HP:0000079	Abnormality of the urinary system
AGM1_HUMAN	HP:0000079	Abnormality of the urinary system
AMMR1_HUMAN	HP:0000079	Abnormality of the urinary system
ARNT2_HUMAN	HP:0000079	Abnormality of the urinary system
BAZ1B_HUMAN	HP:0000079	Abnormality of the urinary system
CCND2_HUMAN	HP:0000079	Abnormality of the urinary system
CCR6_HUMAN	HP:0000079	Abnormality of the urinary system
CLIP2_HUMAN	HP:0000079	Abnormality of the urinary system
CO4A_HUMAN	HP:0000079	Abnormality of the urinary system
COA5_HUMAN	HP:0000079	Abnormality of the urinary system
COX10_HUMAN	HP:0000079	Abnormality of the urinary system
COX20_HUMAN	HP:0000079	Abnormality of the urinary system
COX2_HUMAN	HP:0000079	Abnormality of the urinary system
CRKL_HUMAN	HP:0000079	Abnormality of the urinary system
CSPP1_HUMAN	HP:0000079	Abnormality of the urinary system
CTLA4_HUMAN	HP:0000079	Abnormality of the urinary system
DPB1_HUMAN	HP:0000079	Abnormality of the urinary system
EAA3_HUMAN	HP:0000079	Abnormality of the urinary system
ECHP_HUMAN	HP:0000079	Abnormality of the urinary system
FAT4_HUMAN	HP:0000079	Abnormality of the urinary system
FGF20_HUMAN	HP:0000079	Abnormality of the urinary system
FLII_HUMAN	HP:0000079	Abnormality of the urinary system
FNBP4_HUMAN	HP:0000079	Abnormality of the urinary system
GBRD_HUMAN	HP:0000079	Abnormality of the urinary system
GPC4_HUMAN	HP:0000079	Abnormality of the urinary system
GT2D1_HUMAN	HP:0000079	Abnormality of the urinary system
GTF2I_HUMAN	HP:0000079	Abnormality of the urinary system
HIC1_HUMAN	HP:0000079	Abnormality of the urinary system
I12R2_HUMAN	HP:0000079	Abnormality of the urinary system
IFIH1_HUMAN	HP:0000079	Abnormality of the urinary system
IGF2_HUMAN	HP:0000079	Abnormality of the urinary system
IL10_HUMAN	HP:0000079	Abnormality of the urinary system
IL23R_HUMAN	HP:0000079	Abnormality of the urinary system
ITA8_HUMAN	HP:0000079	Abnormality of the urinary system
KCAB2_HUMAN	HP:0000079	Abnormality of the urinary system
LETM1_HUMAN	HP:0000079	Abnormality of the urinary system
LHX1_HUMAN	HP:0000079	Abnormality of the urinary system
LIMK1_HUMAN	HP:0000079	Abnormality of the urinary system
LRRF2_HUMAN	HP:0000079	Abnormality of the urinary system
LZTL1_HUMAN	HP:0000079	Abnormality of the urinary system
MK01_HUMAN	HP:0000079	Abnormality of the urinary system
MOC2B_HUMAN	HP:0000079	Abnormality of the urinary system
NAGAB_HUMAN	HP:0000079	Abnormality of the urinary system
NELFA_HUMAN	HP:0000079	Abnormality of the urinary system
NSD2_HUMAN	HP:0000079	Abnormality of the urinary system
NU4M_HUMAN	HP:0000079	Abnormality of the urinary system
OCLN_HUMAN	HP:0000079	Abnormality of the urinary system
PAX1_HUMAN	HP:0000079	Abnormality of the urinary system
PDE6D_HUMAN	HP:0000079	Abnormality of the urinary system
PEPD_HUMAN	HP:0000079	Abnormality of the urinary system
PMS1_HUMAN	HP:0000079	Abnormality of the urinary system
PPBT_HUMAN	HP:0000079	Abnormality of the urinary system
PPM1B_HUMAN	HP:0000079	Abnormality of the urinary system
PRTN3_HUMAN	HP:0000079	Abnormality of the urinary system
PTN3_HUMAN	HP:0000079	Abnormality of the urinary system
PTSS1_HUMAN	HP:0000079	Abnormality of the urinary system
PUF60_HUMAN	HP:0000079	Abnormality of the urinary system
REEP2_HUMAN	HP:0000079	Abnormality of the urinary system
RFC2_HUMAN	HP:0000079	Abnormality of the urinary system
RL15_HUMAN	HP:0000079	Abnormality of the urinary system
RS29_HUMAN	HP:0000079	Abnormality of the urinary system
SMCE1_HUMAN	HP:0000079	Abnormality of the urinary system
SOX11_HUMAN	HP:0000079	Abnormality of the urinary system
SULF1_HUMAN	HP:0000079	Abnormality of the urinary system
SYMM_HUMAN	HP:0000079	Abnormality of the urinary system
TACO1_HUMAN	HP:0000079	Abnormality of the urinary system
TBC20_HUMAN	HP:0000079	Abnormality of the urinary system
TBL2_HUMAN	HP:0000079	Abnormality of the urinary system
TBX6_HUMAN	HP:0000079	Abnormality of the urinary system
TECT3_HUMAN	HP:0000079	Abnormality of the urinary system
THTM_HUMAN	HP:0000079	Abnormality of the urinary system
TLR4_HUMAN	HP:0000079	Abnormality of the urinary system
VAMP7_HUMAN	HP:0000079	Abnormality of the urinary system
VANG2_HUMAN	HP:0000079	Abnormality of the urinary system
YAP1_HUMAN	HP:0000079	Abnormality of the urinary system
BAZ1B_HUMAN	HP:0000080	Abnormality of reproductive system physiology
CCNO_HUMAN	HP:0000080	Abnormality of reproductive system physiology
CHIP_HUMAN	HP:0000080	Abnormality of reproductive system physiology
CLIP2_HUMAN	HP:0000080	Abnormality of reproductive system physiology
CTSR2_HUMAN	HP:0000080	Abnormality of reproductive system physiology
DPOD1_HUMAN	HP:0000080	Abnormality of reproductive system physiology
GT2D1_HUMAN	HP:0000080	Abnormality of reproductive system physiology
GTF2I_HUMAN	HP:0000080	Abnormality of reproductive system physiology
LIMK1_HUMAN	HP:0000080	Abnormality of reproductive system physiology
LZTL1_HUMAN	HP:0000080	Abnormality of reproductive system physiology
PLPL6_HUMAN	HP:0000080	Abnormality of reproductive system physiology
PRLR_HUMAN	HP:0000080	Abnormality of reproductive system physiology
RFC2_HUMAN	HP:0000080	Abnormality of reproductive system physiology
SYCP3_HUMAN	HP:0000080	Abnormality of reproductive system physiology
TAF4B_HUMAN	HP:0000080	Abnormality of reproductive system physiology
TBL2_HUMAN	HP:0000080	Abnormality of reproductive system physiology
ZP1_HUMAN	HP:0000080	Abnormality of reproductive system physiology
AMMR1_HUMAN	HP:0000082	Abnormality of renal physiology
BAZ1B_HUMAN	HP:0000082	Abnormality of renal physiology
CCR6_HUMAN	HP:0000082	Abnormality of renal physiology
CLIP2_HUMAN	HP:0000082	Abnormality of renal physiology
CO4A_HUMAN	HP:0000082	Abnormality of renal physiology
COA5_HUMAN	HP:0000082	Abnormality of renal physiology
COX10_HUMAN	HP:0000082	Abnormality of renal physiology
COX20_HUMAN	HP:0000082	Abnormality of renal physiology
COX2_HUMAN	HP:0000082	Abnormality of renal physiology
CTLA4_HUMAN	HP:0000082	Abnormality of renal physiology
DPB1_HUMAN	HP:0000082	Abnormality of renal physiology
GT2D1_HUMAN	HP:0000082	Abnormality of renal physiology
GTF2I_HUMAN	HP:0000082	Abnormality of renal physiology
I12R2_HUMAN	HP:0000082	Abnormality of renal physiology
IFIH1_HUMAN	HP:0000082	Abnormality of renal physiology
IL10_HUMAN	HP:0000082	Abnormality of renal physiology
IL23R_HUMAN	HP:0000082	Abnormality of renal physiology
LHX1_HUMAN	HP:0000082	Abnormality of renal physiology
LIMK1_HUMAN	HP:0000082	Abnormality of renal physiology
LZTL1_HUMAN	HP:0000082	Abnormality of renal physiology
NU4M_HUMAN	HP:0000082	Abnormality of renal physiology
OCLN_HUMAN	HP:0000082	Abnormality of renal physiology
PRTN3_HUMAN	HP:0000082	Abnormality of renal physiology
RFC2_HUMAN	HP:0000082	Abnormality of renal physiology
TACO1_HUMAN	HP:0000082	Abnormality of renal physiology
TBL2_HUMAN	HP:0000082	Abnormality of renal physiology
TLR4_HUMAN	HP:0000082	Abnormality of renal physiology
AMMR1_HUMAN	HP:0000083	Renal insufficiency
BAZ1B_HUMAN	HP:0000083	Renal insufficiency
CCR6_HUMAN	HP:0000083	Renal insufficiency
CLIP2_HUMAN	HP:0000083	Renal insufficiency
CO4A_HUMAN	HP:0000083	Renal insufficiency
COX2_HUMAN	HP:0000083	Renal insufficiency
CTLA4_HUMAN	HP:0000083	Renal insufficiency
DPB1_HUMAN	HP:0000083	Renal insufficiency
GT2D1_HUMAN	HP:0000083	Renal insufficiency
GTF2I_HUMAN	HP:0000083	Renal insufficiency
I12R2_HUMAN	HP:0000083	Renal insufficiency
IL10_HUMAN	HP:0000083	Renal insufficiency
IL23R_HUMAN	HP:0000083	Renal insufficiency
LHX1_HUMAN	HP:0000083	Renal insufficiency
LIMK1_HUMAN	HP:0000083	Renal insufficiency
NU4M_HUMAN	HP:0000083	Renal insufficiency
OCLN_HUMAN	HP:0000083	Renal insufficiency
PRTN3_HUMAN	HP:0000083	Renal insufficiency
RFC2_HUMAN	HP:0000083	Renal insufficiency
TBL2_HUMAN	HP:0000083	Renal insufficiency
TLR4_HUMAN	HP:0000083	Renal insufficiency
AMMR1_HUMAN	HP:0000093	Proteinuria
BAZ1B_HUMAN	HP:0000093	Proteinuria
CLIP2_HUMAN	HP:0000093	Proteinuria
COA5_HUMAN	HP:0000093	Proteinuria
COX10_HUMAN	HP:0000093	Proteinuria
COX20_HUMAN	HP:0000093	Proteinuria
COX2_HUMAN	HP:0000093	Proteinuria
CTLA4_HUMAN	HP:0000093	Proteinuria
DPB1_HUMAN	HP:0000093	Proteinuria
ECHP_HUMAN	HP:0000093	Proteinuria
GT2D1_HUMAN	HP:0000093	Proteinuria
GTF2I_HUMAN	HP:0000093	Proteinuria
ITA8_HUMAN	HP:0000093	Proteinuria
LIMK1_HUMAN	HP:0000093	Proteinuria
NU4M_HUMAN	HP:0000093	Proteinuria
PRTN3_HUMAN	HP:0000093	Proteinuria
RFC2_HUMAN	HP:0000093	Proteinuria
TACO1_HUMAN	HP:0000093	Proteinuria
TBL2_HUMAN	HP:0000093	Proteinuria
ACTH_HUMAN	HP:0000107	Renal cyst
BAZ1B_HUMAN	HP:0000107	Renal cyst
CLIP2_HUMAN	HP:0000107	Renal cyst
GBRD_HUMAN	HP:0000107	Renal cyst
GPC4_HUMAN	HP:0000107	Renal cyst
GT2D1_HUMAN	HP:0000107	Renal cyst
GTF2I_HUMAN	HP:0000107	Renal cyst
KCAB2_HUMAN	HP:0000107	Renal cyst
LHX1_HUMAN	HP:0000107	Renal cyst
LIMK1_HUMAN	HP:0000107	Renal cyst
LZTL1_HUMAN	HP:0000107	Renal cyst
PUF60_HUMAN	HP:0000107	Renal cyst
RFC2_HUMAN	HP:0000107	Renal cyst
TBL2_HUMAN	HP:0000107	Renal cyst
1433E_HUMAN	HP:0000118	Phenotypic abnormality
5NTC_HUMAN	HP:0000118	Phenotypic abnormality
ABCA5_HUMAN	HP:0000118	Phenotypic abnormality
ACBP_HUMAN	HP:0000118	Phenotypic abnormality
ACHA7_HUMAN	HP:0000118	Phenotypic abnormality
ACTH_HUMAN	HP:0000118	Phenotypic abnormality
ADA2B_HUMAN	HP:0000118	Phenotypic abnormality
ADCY1_HUMAN	HP:0000118	Phenotypic abnormality
ADCY6_HUMAN	HP:0000118	Phenotypic abnormality
ADNP_HUMAN	HP:0000118	Phenotypic abnormality
AGGF1_HUMAN	HP:0000118	Phenotypic abnormality
AGM1_HUMAN	HP:0000118	Phenotypic abnormality
AMMR1_HUMAN	HP:0000118	Phenotypic abnormality
AMPD2_HUMAN	HP:0000118	Phenotypic abnormality
ANO10_HUMAN	HP:0000118	Phenotypic abnormality
ANO5_HUMAN	HP:0000118	Phenotypic abnormality
ARNT2_HUMAN	HP:0000118	Phenotypic abnormality
ASPH_HUMAN	HP:0000118	Phenotypic abnormality
AT10A_HUMAN	HP:0000118	Phenotypic abnormality
ATLA3_HUMAN	HP:0000118	Phenotypic abnormality
ATOH7_HUMAN	HP:0000118	Phenotypic abnormality
ATP8_HUMAN	HP:0000118	Phenotypic abnormality
ATRIP_HUMAN	HP:0000118	Phenotypic abnormality
BAZ1B_HUMAN	HP:0000118	Phenotypic abnormality
BCL6_HUMAN	HP:0000118	Phenotypic abnormality
BIN1_HUMAN	HP:0000118	Phenotypic abnormality
BIRC3_HUMAN	HP:0000118	Phenotypic abnormality
BMS1_HUMAN	HP:0000118	Phenotypic abnormality
C2CD3_HUMAN	HP:0000118	Phenotypic abnormality
CAH5A_HUMAN	HP:0000118	Phenotypic abnormality
CALR_HUMAN	HP:0000118	Phenotypic abnormality
CAN5_HUMAN	HP:0000118	Phenotypic abnormality
CATF_HUMAN	HP:0000118	Phenotypic abnormality
CCND2_HUMAN	HP:0000118	Phenotypic abnormality
CCNO_HUMAN	HP:0000118	Phenotypic abnormality
CCR6_HUMAN	HP:0000118	Phenotypic abnormality
CDN1A_HUMAN	HP:0000118	Phenotypic abnormality
CDN2C_HUMAN	HP:0000118	Phenotypic abnormality
CH037_HUMAN	HP:0000118	Phenotypic abnormality
CHC10_HUMAN	HP:0000118	Phenotypic abnormality
CHIP_HUMAN	HP:0000118	Phenotypic abnormality
CIB2_HUMAN	HP:0000118	Phenotypic abnormality
CLCN2_HUMAN	HP:0000118	Phenotypic abnormality
CLIP2_HUMAN	HP:0000118	Phenotypic abnormality
CLP1_HUMAN	HP:0000118	Phenotypic abnormality
CNTN4_HUMAN	HP:0000118	Phenotypic abnormality
CNTP1_HUMAN	HP:0000118	Phenotypic abnormality
CO4A_HUMAN	HP:0000118	Phenotypic abnormality
COA5_HUMAN	HP:0000118	Phenotypic abnormality
COASY_HUMAN	HP:0000118	Phenotypic abnormality
COCA1_HUMAN	HP:0000118	Phenotypic abnormality
CORA1_HUMAN	HP:0000118	Phenotypic abnormality
COT1_HUMAN	HP:0000118	Phenotypic abnormality
COT2_HUMAN	HP:0000118	Phenotypic abnormality
COX10_HUMAN	HP:0000118	Phenotypic abnormality
COX20_HUMAN	HP:0000118	Phenotypic abnormality
COX2_HUMAN	HP:0000118	Phenotypic abnormality
CRKL_HUMAN	HP:0000118	Phenotypic abnormality
CSPP1_HUMAN	HP:0000118	Phenotypic abnormality
CTLA4_HUMAN	HP:0000118	Phenotypic abnormality
CTNA3_HUMAN	HP:0000118	Phenotypic abnormality
CTSR2_HUMAN	HP:0000118	Phenotypic abnormality
CYFP1_HUMAN	HP:0000118	Phenotypic abnormality
DCAF8_HUMAN	HP:0000118	Phenotypic abnormality
DCTN4_HUMAN	HP:0000118	Phenotypic abnormality
DEAF1_HUMAN	HP:0000118	Phenotypic abnormality
DGAT1_HUMAN	HP:0000118	Phenotypic abnormality
DHDDS_HUMAN	HP:0000118	Phenotypic abnormality
DNM3A_HUMAN	HP:0000118	Phenotypic abnormality
DOCK7_HUMAN	HP:0000118	Phenotypic abnormality
DPB1_HUMAN	HP:0000118	Phenotypic abnormality
DPOD1_HUMAN	HP:0000118	Phenotypic abnormality
DPP6_HUMAN	HP:0000118	Phenotypic abnormality
DRD5_HUMAN	HP:0000118	Phenotypic abnormality
DYR1B_HUMAN	HP:0000118	Phenotypic abnormality
EAA3_HUMAN	HP:0000118	Phenotypic abnormality
ECHP_HUMAN	HP:0000118	Phenotypic abnormality
EDN1_HUMAN	HP:0000118	Phenotypic abnormality
ELOV5_HUMAN	HP:0000118	Phenotypic abnormality
ELP4_HUMAN	HP:0000118	Phenotypic abnormality
EPOR_HUMAN	HP:0000118	Phenotypic abnormality
ERBB4_HUMAN	HP:0000118	Phenotypic abnormality
ESR1_HUMAN	HP:0000118	Phenotypic abnormality
EYS_HUMAN	HP:0000118	Phenotypic abnormality
FAT4_HUMAN	HP:0000118	Phenotypic abnormality
FBX31_HUMAN	HP:0000118	Phenotypic abnormality
FCG3A_HUMAN	HP:0000118	Phenotypic abnormality
FGF20_HUMAN	HP:0000118	Phenotypic abnormality
FGF5_HUMAN	HP:0000118	Phenotypic abnormality
FIBG_HUMAN	HP:0000118	Phenotypic abnormality
FLI1_HUMAN	HP:0000118	Phenotypic abnormality
FLII_HUMAN	HP:0000118	Phenotypic abnormality
FNBP4_HUMAN	HP:0000118	Phenotypic abnormality
FRIH_HUMAN	HP:0000118	Phenotypic abnormality
GATA5_HUMAN	HP:0000118	Phenotypic abnormality
GBRA1_HUMAN	HP:0000118	Phenotypic abnormality
GBRD_HUMAN	HP:0000118	Phenotypic abnormality
GFI1B_HUMAN	HP:0000118	Phenotypic abnormality
GMPPA_HUMAN	HP:0000118	Phenotypic abnormality
GNT2A_HUMAN	HP:0000118	Phenotypic abnormality
GPC4_HUMAN	HP:0000118	Phenotypic abnormality
GREM1_HUMAN	HP:0000118	Phenotypic abnormality
GRHL3_HUMAN	HP:0000118	Phenotypic abnormality
GRP2_HUMAN	HP:0000118	Phenotypic abnormality
GSC_HUMAN	HP:0000118	Phenotypic abnormality
GT2D1_HUMAN	HP:0000118	Phenotypic abnormality
GTF2I_HUMAN	HP:0000118	Phenotypic abnormality
GTR3_HUMAN	HP:0000118	Phenotypic abnormality
HACD1_HUMAN	HP:0000118	Phenotypic abnormality
HCN1_HUMAN	HP:0000118	Phenotypic abnormality
HDAC9_HUMAN	HP:0000118	Phenotypic abnormality
HDBP1_HUMAN	HP:0000118	Phenotypic abnormality
HERC2_HUMAN	HP:0000118	Phenotypic abnormality
HIC1_HUMAN	HP:0000118	Phenotypic abnormality
HMGB3_HUMAN	HP:0000118	Phenotypic abnormality
HNRDL_HUMAN	HP:0000118	Phenotypic abnormality
HOIL1_HUMAN	HP:0000118	Phenotypic abnormality
I12R2_HUMAN	HP:0000118	Phenotypic abnormality
IDHC_HUMAN	HP:0000118	Phenotypic abnormality
IF4A3_HUMAN	HP:0000118	Phenotypic abnormality
IFIH1_HUMAN	HP:0000118	Phenotypic abnormality
IGF2_HUMAN	HP:0000118	Phenotypic abnormality
IKKB_HUMAN	HP:0000118	Phenotypic abnormality
IL10_HUMAN	HP:0000118	Phenotypic abnormality
IL21_HUMAN	HP:0000118	Phenotypic abnormality
IL23R_HUMAN	HP:0000118	Phenotypic abnormality
IL6_HUMAN	HP:0000118	Phenotypic abnormality
IMPG1_HUMAN	HP:0000118	Phenotypic abnormality
ISK1_HUMAN	HP:0000118	Phenotypic abnormality
ITA8_HUMAN	HP:0000118	Phenotypic abnormality
JAGN1_HUMAN	HP:0000118	Phenotypic abnormality
K2C6C_HUMAN	HP:0000118	Phenotypic abnormality
KAPCA_HUMAN	HP:0000118	Phenotypic abnormality
KCAB2_HUMAN	HP:0000118	Phenotypic abnormality
KIF1C_HUMAN	HP:0000118	Phenotypic abnormality
KIF4A_HUMAN	HP:0000118	Phenotypic abnormality
KIZ_HUMAN	HP:0000118	Phenotypic abnormality
KLH41_HUMAN	HP:0000118	Phenotypic abnormality
KPTN_HUMAN	HP:0000118	Phenotypic abnormality
LAMA1_HUMAN	HP:0000118	Phenotypic abnormality
LCK_HUMAN	HP:0000118	Phenotypic abnormality
LETM1_HUMAN	HP:0000118	Phenotypic abnormality
LHX1_HUMAN	HP:0000118	Phenotypic abnormality
LIMK1_HUMAN	HP:0000118	Phenotypic abnormality
LIPS_HUMAN	HP:0000118	Phenotypic abnormality
LRRF2_HUMAN	HP:0000118	Phenotypic abnormality
LYRM4_HUMAN	HP:0000118	Phenotypic abnormality
LZTL1_HUMAN	HP:0000118	Phenotypic abnormality
MEIS2_HUMAN	HP:0000118	Phenotypic abnormality
MK01_HUMAN	HP:0000118	Phenotypic abnormality
MLX_HUMAN	HP:0000118	Phenotypic abnormality
MOC2B_HUMAN	HP:0000118	Phenotypic abnormality
MYB_HUMAN	HP:0000118	Phenotypic abnormality
MYH14_HUMAN	HP:0000118	Phenotypic abnormality
MYO15_HUMAN	HP:0000118	Phenotypic abnormality
NAGAB_HUMAN	HP:0000118	Phenotypic abnormality
NCKX4_HUMAN	HP:0000118	Phenotypic abnormality
NELFA_HUMAN	HP:0000118	Phenotypic abnormality
NEXN_HUMAN	HP:0000118	Phenotypic abnormality
NSD2_HUMAN	HP:0000118	Phenotypic abnormality
NU155_HUMAN	HP:0000118	Phenotypic abnormality
NU4M_HUMAN	HP:0000118	Phenotypic abnormality
OCLN_HUMAN	HP:0000118	Phenotypic abnormality
P2RX2_HUMAN	HP:0000118	Phenotypic abnormality
PAX1_HUMAN	HP:0000118	Phenotypic abnormality
PCNA_HUMAN	HP:0000118	Phenotypic abnormality
PCY1A_HUMAN	HP:0000118	Phenotypic abnormality
PDE6D_HUMAN	HP:0000118	Phenotypic abnormality
PEPD_HUMAN	HP:0000118	Phenotypic abnormality
PF21A_HUMAN	HP:0000118	Phenotypic abnormality
PGAP1_HUMAN	HP:0000118	Phenotypic abnormality
PGAP3_HUMAN	HP:0000118	Phenotypic abnormality
PK3CD_HUMAN	HP:0000118	Phenotypic abnormality
PLPL6_HUMAN	HP:0000118	Phenotypic abnormality
PMS1_HUMAN	HP:0000118	Phenotypic abnormality
POC1B_HUMAN	HP:0000118	Phenotypic abnormality
POTE1_HUMAN	HP:0000118	Phenotypic abnormality
PPBT_HUMAN	HP:0000118	Phenotypic abnormality
PPM1B_HUMAN	HP:0000118	Phenotypic abnormality
PRLR_HUMAN	HP:0000118	Phenotypic abnormality
PRP4_HUMAN	HP:0000118	Phenotypic abnormality
PRTN3_HUMAN	HP:0000118	Phenotypic abnormality
PTHD1_HUMAN	HP:0000118	Phenotypic abnormality
PTN3_HUMAN	HP:0000118	Phenotypic abnormality
PTPRF_HUMAN	HP:0000118	Phenotypic abnormality
PTSS1_HUMAN	HP:0000118	Phenotypic abnormality
PUF60_HUMAN	HP:0000118	Phenotypic abnormality
PXDN_HUMAN	HP:0000118	Phenotypic abnormality
REEP2_HUMAN	HP:0000118	Phenotypic abnormality
RFC2_HUMAN	HP:0000118	Phenotypic abnormality
RL15_HUMAN	HP:0000118	Phenotypic abnormality
RS29_HUMAN	HP:0000118	Phenotypic abnormality
RUBIC_HUMAN	HP:0000118	Phenotypic abnormality
S13A5_HUMAN	HP:0000118	Phenotypic abnormality
S35A3_HUMAN	HP:0000118	Phenotypic abnormality
S39A5_HUMAN	HP:0000118	Phenotypic abnormality
S7A14_HUMAN	HP:0000118	Phenotypic abnormality
SALL2_HUMAN	HP:0000118	Phenotypic abnormality
SCNAA_HUMAN	HP:0000118	Phenotypic abnormality
SCNBA_HUMAN	HP:0000118	Phenotypic abnormality
SEM5A_HUMAN	HP:0000118	Phenotypic abnormality
SFXN4_HUMAN	HP:0000118	Phenotypic abnormality
SH2B1_HUMAN	HP:0000118	Phenotypic abnormality
SMCE1_HUMAN	HP:0000118	Phenotypic abnormality
SNX3_HUMAN	HP:0000118	Phenotypic abnormality
SOX11_HUMAN	HP:0000118	Phenotypic abnormality
SPB7_HUMAN	HP:0000118	Phenotypic abnormality
SPEG_HUMAN	HP:0000118	Phenotypic abnormality
STAG3_HUMAN	HP:0000118	Phenotypic abnormality
STING_HUMAN	HP:0000118	Phenotypic abnormality
STT3A_HUMAN	HP:0000118	Phenotypic abnormality
STT3B_HUMAN	HP:0000118	Phenotypic abnormality
STX1A_HUMAN	HP:0000118	Phenotypic abnormality
STX3_HUMAN	HP:0000118	Phenotypic abnormality
SULF1_HUMAN	HP:0000118	Phenotypic abnormality
SYCP3_HUMAN	HP:0000118	Phenotypic abnormality
SYMM_HUMAN	HP:0000118	Phenotypic abnormality
SYQ_HUMAN	HP:0000118	Phenotypic abnormality
SYTM_HUMAN	HP:0000118	Phenotypic abnormality
SYVM_HUMAN	HP:0000118	Phenotypic abnormality
SZT2_HUMAN	HP:0000118	Phenotypic abnormality
TACO1_HUMAN	HP:0000118	Phenotypic abnormality
TAF2_HUMAN	HP:0000118	Phenotypic abnormality
TAF4B_HUMAN	HP:0000118	Phenotypic abnormality
TBB2A_HUMAN	HP:0000118	Phenotypic abnormality
TBB5_HUMAN	HP:0000118	Phenotypic abnormality
TBC20_HUMAN	HP:0000118	Phenotypic abnormality
TBL2_HUMAN	HP:0000118	Phenotypic abnormality
TBX2_HUMAN	HP:0000118	Phenotypic abnormality
TBX6_HUMAN	HP:0000118	Phenotypic abnormality
TECT3_HUMAN	HP:0000118	Phenotypic abnormality
TECTA_HUMAN	HP:0000118	Phenotypic abnormality
TFE2_HUMAN	HP:0000118	Phenotypic abnormality
THTM_HUMAN	HP:0000118	Phenotypic abnormality
TLR4_HUMAN	HP:0000118	Phenotypic abnormality
TM10A_HUMAN	HP:0000118	Phenotypic abnormality
TMM98_HUMAN	HP:0000118	Phenotypic abnormality
TNPO3_HUMAN	HP:0000118	Phenotypic abnormality
TNR27_HUMAN	HP:0000118	Phenotypic abnormality
TPC_HUMAN	HP:0000118	Phenotypic abnormality
TRIM1_HUMAN	HP:0000118	Phenotypic abnormality
TUB_HUMAN	HP:0000118	Phenotypic abnormality
USP9X_HUMAN	HP:0000118	Phenotypic abnormality
VAMP1_HUMAN	HP:0000118	Phenotypic abnormality
VAMP7_HUMAN	HP:0000118	Phenotypic abnormality
VANG2_HUMAN	HP:0000118	Phenotypic abnormality
VEGFC_HUMAN	HP:0000118	Phenotypic abnormality
VPS53_HUMAN	HP:0000118	Phenotypic abnormality
XYLT1_HUMAN	HP:0000118	Phenotypic abnormality
YAP1_HUMAN	HP:0000118	Phenotypic abnormality
ZBT20_HUMAN	HP:0000118	Phenotypic abnormality
ZDHC9_HUMAN	HP:0000118	Phenotypic abnormality
ZFP90_HUMAN	HP:0000118	Phenotypic abnormality
ZP1_HUMAN	HP:0000118	Phenotypic abnormality
1433E_HUMAN	HP:0000119	Abnormality of the genitourinary system
ACTH_HUMAN	HP:0000119	Abnormality of the genitourinary system
AGGF1_HUMAN	HP:0000119	Abnormality of the genitourinary system
AGM1_HUMAN	HP:0000119	Abnormality of the genitourinary system
AMMR1_HUMAN	HP:0000119	Abnormality of the genitourinary system
ARNT2_HUMAN	HP:0000119	Abnormality of the genitourinary system
BAZ1B_HUMAN	HP:0000119	Abnormality of the genitourinary system
C2CD3_HUMAN	HP:0000119	Abnormality of the genitourinary system
CCND2_HUMAN	HP:0000119	Abnormality of the genitourinary system
CCNO_HUMAN	HP:0000119	Abnormality of the genitourinary system
CCR6_HUMAN	HP:0000119	Abnormality of the genitourinary system
CH037_HUMAN	HP:0000119	Abnormality of the genitourinary system
CHIP_HUMAN	HP:0000119	Abnormality of the genitourinary system
CLIP2_HUMAN	HP:0000119	Abnormality of the genitourinary system
CLP1_HUMAN	HP:0000119	Abnormality of the genitourinary system
CNTN4_HUMAN	HP:0000119	Abnormality of the genitourinary system
CO4A_HUMAN	HP:0000119	Abnormality of the genitourinary system
COA5_HUMAN	HP:0000119	Abnormality of the genitourinary system
COX10_HUMAN	HP:0000119	Abnormality of the genitourinary system
COX20_HUMAN	HP:0000119	Abnormality of the genitourinary system
COX2_HUMAN	HP:0000119	Abnormality of the genitourinary system
CRKL_HUMAN	HP:0000119	Abnormality of the genitourinary system
CSPP1_HUMAN	HP:0000119	Abnormality of the genitourinary system
CTLA4_HUMAN	HP:0000119	Abnormality of the genitourinary system
CTSR2_HUMAN	HP:0000119	Abnormality of the genitourinary system
DHDDS_HUMAN	HP:0000119	Abnormality of the genitourinary system
DPB1_HUMAN	HP:0000119	Abnormality of the genitourinary system
DPOD1_HUMAN	HP:0000119	Abnormality of the genitourinary system
EAA3_HUMAN	HP:0000119	Abnormality of the genitourinary system
ECHP_HUMAN	HP:0000119	Abnormality of the genitourinary system
ESR1_HUMAN	HP:0000119	Abnormality of the genitourinary system
EYS_HUMAN	HP:0000119	Abnormality of the genitourinary system
FAT4_HUMAN	HP:0000119	Abnormality of the genitourinary system
FGF20_HUMAN	HP:0000119	Abnormality of the genitourinary system
FIBG_HUMAN	HP:0000119	Abnormality of the genitourinary system
FLII_HUMAN	HP:0000119	Abnormality of the genitourinary system
FNBP4_HUMAN	HP:0000119	Abnormality of the genitourinary system
GATA5_HUMAN	HP:0000119	Abnormality of the genitourinary system
GBRD_HUMAN	HP:0000119	Abnormality of the genitourinary system
GFI1B_HUMAN	HP:0000119	Abnormality of the genitourinary system
GPC4_HUMAN	HP:0000119	Abnormality of the genitourinary system
GSC_HUMAN	HP:0000119	Abnormality of the genitourinary system
GT2D1_HUMAN	HP:0000119	Abnormality of the genitourinary system
GTF2I_HUMAN	HP:0000119	Abnormality of the genitourinary system
HIC1_HUMAN	HP:0000119	Abnormality of the genitourinary system
I12R2_HUMAN	HP:0000119	Abnormality of the genitourinary system
IDHC_HUMAN	HP:0000119	Abnormality of the genitourinary system
IFIH1_HUMAN	HP:0000119	Abnormality of the genitourinary system
IGF2_HUMAN	HP:0000119	Abnormality of the genitourinary system
IL10_HUMAN	HP:0000119	Abnormality of the genitourinary system
IL23R_HUMAN	HP:0000119	Abnormality of the genitourinary system
ITA8_HUMAN	HP:0000119	Abnormality of the genitourinary system
KCAB2_HUMAN	HP:0000119	Abnormality of the genitourinary system
KIZ_HUMAN	HP:0000119	Abnormality of the genitourinary system
LETM1_HUMAN	HP:0000119	Abnormality of the genitourinary system
LHX1_HUMAN	HP:0000119	Abnormality of the genitourinary system
LIMK1_HUMAN	HP:0000119	Abnormality of the genitourinary system
LRRF2_HUMAN	HP:0000119	Abnormality of the genitourinary system
LZTL1_HUMAN	HP:0000119	Abnormality of the genitourinary system
MK01_HUMAN	HP:0000119	Abnormality of the genitourinary system
MOC2B_HUMAN	HP:0000119	Abnormality of the genitourinary system
NAGAB_HUMAN	HP:0000119	Abnormality of the genitourinary system
NELFA_HUMAN	HP:0000119	Abnormality of the genitourinary system
NSD2_HUMAN	HP:0000119	Abnormality of the genitourinary system
NU4M_HUMAN	HP:0000119	Abnormality of the genitourinary system
OCLN_HUMAN	HP:0000119	Abnormality of the genitourinary system
PAX1_HUMAN	HP:0000119	Abnormality of the genitourinary system
PDE6D_HUMAN	HP:0000119	Abnormality of the genitourinary system
PEPD_HUMAN	HP:0000119	Abnormality of the genitourinary system
PLPL6_HUMAN	HP:0000119	Abnormality of the genitourinary system
PMS1_HUMAN	HP:0000119	Abnormality of the genitourinary system
PPBT_HUMAN	HP:0000119	Abnormality of the genitourinary system
PPM1B_HUMAN	HP:0000119	Abnormality of the genitourinary system
PRLR_HUMAN	HP:0000119	Abnormality of the genitourinary system
PRP4_HUMAN	HP:0000119	Abnormality of the genitourinary system
PRTN3_HUMAN	HP:0000119	Abnormality of the genitourinary system
PTN3_HUMAN	HP:0000119	Abnormality of the genitourinary system
PTSS1_HUMAN	HP:0000119	Abnormality of the genitourinary system
PUF60_HUMAN	HP:0000119	Abnormality of the genitourinary system
REEP2_HUMAN	HP:0000119	Abnormality of the genitourinary system
RFC2_HUMAN	HP:0000119	Abnormality of the genitourinary system
RL15_HUMAN	HP:0000119	Abnormality of the genitourinary system
RS29_HUMAN	HP:0000119	Abnormality of the genitourinary system
S7A14_HUMAN	HP:0000119	Abnormality of the genitourinary system
SMCE1_HUMAN	HP:0000119	Abnormality of the genitourinary system
SNX3_HUMAN	HP:0000119	Abnormality of the genitourinary system
SOX11_HUMAN	HP:0000119	Abnormality of the genitourinary system
STAG3_HUMAN	HP:0000119	Abnormality of the genitourinary system
STT3B_HUMAN	HP:0000119	Abnormality of the genitourinary system
SULF1_HUMAN	HP:0000119	Abnormality of the genitourinary system
SYCP3_HUMAN	HP:0000119	Abnormality of the genitourinary system
SYMM_HUMAN	HP:0000119	Abnormality of the genitourinary system
TACO1_HUMAN	HP:0000119	Abnormality of the genitourinary system
TAF4B_HUMAN	HP:0000119	Abnormality of the genitourinary system
TBC20_HUMAN	HP:0000119	Abnormality of the genitourinary system
TBL2_HUMAN	HP:0000119	Abnormality of the genitourinary system
TBX2_HUMAN	HP:0000119	Abnormality of the genitourinary system
TBX6_HUMAN	HP:0000119	Abnormality of the genitourinary system
TECT3_HUMAN	HP:0000119	Abnormality of the genitourinary system
THTM_HUMAN	HP:0000119	Abnormality of the genitourinary system
TLR4_HUMAN	HP:0000119	Abnormality of the genitourinary system
TM10A_HUMAN	HP:0000119	Abnormality of the genitourinary system
TUB_HUMAN	HP:0000119	Abnormality of the genitourinary system
VAMP7_HUMAN	HP:0000119	Abnormality of the genitourinary system
VANG2_HUMAN	HP:0000119	Abnormality of the genitourinary system
YAP1_HUMAN	HP:0000119	Abnormality of the genitourinary system
ZBT20_HUMAN	HP:0000119	Abnormality of the genitourinary system
ZDHC9_HUMAN	HP:0000119	Abnormality of the genitourinary system
ZP1_HUMAN	HP:0000119	Abnormality of the genitourinary system
BAZ1B_HUMAN	HP:0000137	Abnormality of the ovary
CLIP2_HUMAN	HP:0000137	Abnormality of the ovary
GT2D1_HUMAN	HP:0000137	Abnormality of the ovary
GTF2I_HUMAN	HP:0000137	Abnormality of the ovary
IDHC_HUMAN	HP:0000137	Abnormality of the ovary
LIMK1_HUMAN	HP:0000137	Abnormality of the ovary
LRRF2_HUMAN	HP:0000137	Abnormality of the ovary
LZTL1_HUMAN	HP:0000137	Abnormality of the ovary
PMS1_HUMAN	HP:0000137	Abnormality of the ovary
RFC2_HUMAN	HP:0000137	Abnormality of the ovary
TBL2_HUMAN	HP:0000137	Abnormality of the ovary
VAMP7_HUMAN	HP:0000137	Abnormality of the ovary
1433E_HUMAN	HP:0000152	Abnormality of head or neck
ABCA5_HUMAN	HP:0000152	Abnormality of head or neck
ACHA7_HUMAN	HP:0000152	Abnormality of head or neck
ACTH_HUMAN	HP:0000152	Abnormality of head or neck
ADNP_HUMAN	HP:0000152	Abnormality of head or neck
AGGF1_HUMAN	HP:0000152	Abnormality of head or neck
AGM1_HUMAN	HP:0000152	Abnormality of head or neck
AMMR1_HUMAN	HP:0000152	Abnormality of head or neck
AMPD2_HUMAN	HP:0000152	Abnormality of head or neck
ANO5_HUMAN	HP:0000152	Abnormality of head or neck
ARNT2_HUMAN	HP:0000152	Abnormality of head or neck
ASPH_HUMAN	HP:0000152	Abnormality of head or neck
AT10A_HUMAN	HP:0000152	Abnormality of head or neck
ATOH7_HUMAN	HP:0000152	Abnormality of head or neck
ATRIP_HUMAN	HP:0000152	Abnormality of head or neck
BAZ1B_HUMAN	HP:0000152	Abnormality of head or neck
BIN1_HUMAN	HP:0000152	Abnormality of head or neck
BMS1_HUMAN	HP:0000152	Abnormality of head or neck
C2CD3_HUMAN	HP:0000152	Abnormality of head or neck
CCND2_HUMAN	HP:0000152	Abnormality of head or neck
CCR6_HUMAN	HP:0000152	Abnormality of head or neck
CH037_HUMAN	HP:0000152	Abnormality of head or neck
CHIP_HUMAN	HP:0000152	Abnormality of head or neck
CIB2_HUMAN	HP:0000152	Abnormality of head or neck
CLIP2_HUMAN	HP:0000152	Abnormality of head or neck
CLP1_HUMAN	HP:0000152	Abnormality of head or neck
CNTN4_HUMAN	HP:0000152	Abnormality of head or neck
CO4A_HUMAN	HP:0000152	Abnormality of head or neck
CORA1_HUMAN	HP:0000152	Abnormality of head or neck
COX2_HUMAN	HP:0000152	Abnormality of head or neck
CRKL_HUMAN	HP:0000152	Abnormality of head or neck
CSPP1_HUMAN	HP:0000152	Abnormality of head or neck
CTLA4_HUMAN	HP:0000152	Abnormality of head or neck
CYFP1_HUMAN	HP:0000152	Abnormality of head or neck
DEAF1_HUMAN	HP:0000152	Abnormality of head or neck
DHDDS_HUMAN	HP:0000152	Abnormality of head or neck
DNM3A_HUMAN	HP:0000152	Abnormality of head or neck
DOCK7_HUMAN	HP:0000152	Abnormality of head or neck
DPB1_HUMAN	HP:0000152	Abnormality of head or neck
DPOD1_HUMAN	HP:0000152	Abnormality of head or neck
DPP6_HUMAN	HP:0000152	Abnormality of head or neck
EDN1_HUMAN	HP:0000152	Abnormality of head or neck
EPOR_HUMAN	HP:0000152	Abnormality of head or neck
EYS_HUMAN	HP:0000152	Abnormality of head or neck
FAT4_HUMAN	HP:0000152	Abnormality of head or neck
FBX31_HUMAN	HP:0000152	Abnormality of head or neck
FCG3A_HUMAN	HP:0000152	Abnormality of head or neck
FGF20_HUMAN	HP:0000152	Abnormality of head or neck
FGF5_HUMAN	HP:0000152	Abnormality of head or neck
FIBG_HUMAN	HP:0000152	Abnormality of head or neck
FLII_HUMAN	HP:0000152	Abnormality of head or neck
FNBP4_HUMAN	HP:0000152	Abnormality of head or neck
GATA5_HUMAN	HP:0000152	Abnormality of head or neck
GBRD_HUMAN	HP:0000152	Abnormality of head or neck
GFI1B_HUMAN	HP:0000152	Abnormality of head or neck
GMPPA_HUMAN	HP:0000152	Abnormality of head or neck
GPC4_HUMAN	HP:0000152	Abnormality of head or neck
GRHL3_HUMAN	HP:0000152	Abnormality of head or neck
GRP2_HUMAN	HP:0000152	Abnormality of head or neck
GSC_HUMAN	HP:0000152	Abnormality of head or neck
GT2D1_HUMAN	HP:0000152	Abnormality of head or neck
GTF2I_HUMAN	HP:0000152	Abnormality of head or neck
HDAC9_HUMAN	HP:0000152	Abnormality of head or neck
HERC2_HUMAN	HP:0000152	Abnormality of head or neck
HIC1_HUMAN	HP:0000152	Abnormality of head or neck
HMGB3_HUMAN	HP:0000152	Abnormality of head or neck
I12R2_HUMAN	HP:0000152	Abnormality of head or neck
IF4A3_HUMAN	HP:0000152	Abnormality of head or neck
IFIH1_HUMAN	HP:0000152	Abnormality of head or neck
IGF2_HUMAN	HP:0000152	Abnormality of head or neck
IL10_HUMAN	HP:0000152	Abnormality of head or neck
IL23R_HUMAN	HP:0000152	Abnormality of head or neck
ITA8_HUMAN	HP:0000152	Abnormality of head or neck
KCAB2_HUMAN	HP:0000152	Abnormality of head or neck
KIZ_HUMAN	HP:0000152	Abnormality of head or neck
KLH41_HUMAN	HP:0000152	Abnormality of head or neck
KPTN_HUMAN	HP:0000152	Abnormality of head or neck
LETM1_HUMAN	HP:0000152	Abnormality of head or neck
LHX1_HUMAN	HP:0000152	Abnormality of head or neck
LIMK1_HUMAN	HP:0000152	Abnormality of head or neck
LZTL1_HUMAN	HP:0000152	Abnormality of head or neck
MEIS2_HUMAN	HP:0000152	Abnormality of head or neck
MK01_HUMAN	HP:0000152	Abnormality of head or neck
MOC2B_HUMAN	HP:0000152	Abnormality of head or neck
NAGAB_HUMAN	HP:0000152	Abnormality of head or neck
NCKX4_HUMAN	HP:0000152	Abnormality of head or neck
NELFA_HUMAN	HP:0000152	Abnormality of head or neck
NSD2_HUMAN	HP:0000152	Abnormality of head or neck
NU4M_HUMAN	HP:0000152	Abnormality of head or neck
OCLN_HUMAN	HP:0000152	Abnormality of head or neck
PAX1_HUMAN	HP:0000152	Abnormality of head or neck
PCNA_HUMAN	HP:0000152	Abnormality of head or neck
PCY1A_HUMAN	HP:0000152	Abnormality of head or neck
PDE6D_HUMAN	HP:0000152	Abnormality of head or neck
PEPD_HUMAN	HP:0000152	Abnormality of head or neck
PF21A_HUMAN	HP:0000152	Abnormality of head or neck
PGAP3_HUMAN	HP:0000152	Abnormality of head or neck
PLPL6_HUMAN	HP:0000152	Abnormality of head or neck
PPBT_HUMAN	HP:0000152	Abnormality of head or neck
PPM1B_HUMAN	HP:0000152	Abnormality of head or neck
PRP4_HUMAN	HP:0000152	Abnormality of head or neck
PRTN3_HUMAN	HP:0000152	Abnormality of head or neck
PTPRF_HUMAN	HP:0000152	Abnormality of head or neck
PTSS1_HUMAN	HP:0000152	Abnormality of head or neck
PUF60_HUMAN	HP:0000152	Abnormality of head or neck
PXDN_HUMAN	HP:0000152	Abnormality of head or neck
RFC2_HUMAN	HP:0000152	Abnormality of head or neck
RL15_HUMAN	HP:0000152	Abnormality of head or neck
RS29_HUMAN	HP:0000152	Abnormality of head or neck
S35A3_HUMAN	HP:0000152	Abnormality of head or neck
S7A14_HUMAN	HP:0000152	Abnormality of head or neck
SEM5A_HUMAN	HP:0000152	Abnormality of head or neck
SH2B1_HUMAN	HP:0000152	Abnormality of head or neck
SMCE1_HUMAN	HP:0000152	Abnormality of head or neck
SNX3_HUMAN	HP:0000152	Abnormality of head or neck
SOX11_HUMAN	HP:0000152	Abnormality of head or neck
SPEG_HUMAN	HP:0000152	Abnormality of head or neck
STT3A_HUMAN	HP:0000152	Abnormality of head or neck
STT3B_HUMAN	HP:0000152	Abnormality of head or neck
SULF1_HUMAN	HP:0000152	Abnormality of head or neck
SYQ_HUMAN	HP:0000152	Abnormality of head or neck
SYVM_HUMAN	HP:0000152	Abnormality of head or neck
SZT2_HUMAN	HP:0000152	Abnormality of head or neck
TAF2_HUMAN	HP:0000152	Abnormality of head or neck
TBB5_HUMAN	HP:0000152	Abnormality of head or neck
TBC20_HUMAN	HP:0000152	Abnormality of head or neck
TBL2_HUMAN	HP:0000152	Abnormality of head or neck
TBX2_HUMAN	HP:0000152	Abnormality of head or neck
TBX6_HUMAN	HP:0000152	Abnormality of head or neck
TECT3_HUMAN	HP:0000152	Abnormality of head or neck
TFE2_HUMAN	HP:0000152	Abnormality of head or neck
THTM_HUMAN	HP:0000152	Abnormality of head or neck
TLR4_HUMAN	HP:0000152	Abnormality of head or neck
TM10A_HUMAN	HP:0000152	Abnormality of head or neck
TNR27_HUMAN	HP:0000152	Abnormality of head or neck
TPC_HUMAN	HP:0000152	Abnormality of head or neck
TRIM1_HUMAN	HP:0000152	Abnormality of head or neck
TUB_HUMAN	HP:0000152	Abnormality of head or neck
USP9X_HUMAN	HP:0000152	Abnormality of head or neck
VPS53_HUMAN	HP:0000152	Abnormality of head or neck
XYLT1_HUMAN	HP:0000152	Abnormality of head or neck
YAP1_HUMAN	HP:0000152	Abnormality of head or neck
ZBT20_HUMAN	HP:0000152	Abnormality of head or neck
ZDHC9_HUMAN	HP:0000152	Abnormality of head or neck
1433E_HUMAN	HP:0000153	Abnormality of the mouth
ABCA5_HUMAN	HP:0000153	Abnormality of the mouth
ACTH_HUMAN	HP:0000153	Abnormality of the mouth
ADNP_HUMAN	HP:0000153	Abnormality of the mouth
AGM1_HUMAN	HP:0000153	Abnormality of the mouth
AMMR1_HUMAN	HP:0000153	Abnormality of the mouth
ANO5_HUMAN	HP:0000153	Abnormality of the mouth
ASPH_HUMAN	HP:0000153	Abnormality of the mouth
AT10A_HUMAN	HP:0000153	Abnormality of the mouth
ATRIP_HUMAN	HP:0000153	Abnormality of the mouth
BAZ1B_HUMAN	HP:0000153	Abnormality of the mouth
BIN1_HUMAN	HP:0000153	Abnormality of the mouth
C2CD3_HUMAN	HP:0000153	Abnormality of the mouth
CCND2_HUMAN	HP:0000153	Abnormality of the mouth
CCR6_HUMAN	HP:0000153	Abnormality of the mouth
CIB2_HUMAN	HP:0000153	Abnormality of the mouth
CLIP2_HUMAN	HP:0000153	Abnormality of the mouth
CLP1_HUMAN	HP:0000153	Abnormality of the mouth
CNTN4_HUMAN	HP:0000153	Abnormality of the mouth
CO4A_HUMAN	HP:0000153	Abnormality of the mouth
COX2_HUMAN	HP:0000153	Abnormality of the mouth
CRKL_HUMAN	HP:0000153	Abnormality of the mouth
CSPP1_HUMAN	HP:0000153	Abnormality of the mouth
CTLA4_HUMAN	HP:0000153	Abnormality of the mouth
CYFP1_HUMAN	HP:0000153	Abnormality of the mouth
DEAF1_HUMAN	HP:0000153	Abnormality of the mouth
DOCK7_HUMAN	HP:0000153	Abnormality of the mouth
DPB1_HUMAN	HP:0000153	Abnormality of the mouth
DPOD1_HUMAN	HP:0000153	Abnormality of the mouth
DPP6_HUMAN	HP:0000153	Abnormality of the mouth
EDN1_HUMAN	HP:0000153	Abnormality of the mouth
FAT4_HUMAN	HP:0000153	Abnormality of the mouth
FGF20_HUMAN	HP:0000153	Abnormality of the mouth
FIBG_HUMAN	HP:0000153	Abnormality of the mouth
FLII_HUMAN	HP:0000153	Abnormality of the mouth
FNBP4_HUMAN	HP:0000153	Abnormality of the mouth
GATA5_HUMAN	HP:0000153	Abnormality of the mouth
GBRD_HUMAN	HP:0000153	Abnormality of the mouth
GPC4_HUMAN	HP:0000153	Abnormality of the mouth
GRHL3_HUMAN	HP:0000153	Abnormality of the mouth
GSC_HUMAN	HP:0000153	Abnormality of the mouth
GT2D1_HUMAN	HP:0000153	Abnormality of the mouth
GTF2I_HUMAN	HP:0000153	Abnormality of the mouth
HDAC9_HUMAN	HP:0000153	Abnormality of the mouth
HERC2_HUMAN	HP:0000153	Abnormality of the mouth
HIC1_HUMAN	HP:0000153	Abnormality of the mouth
I12R2_HUMAN	HP:0000153	Abnormality of the mouth
IF4A3_HUMAN	HP:0000153	Abnormality of the mouth
IGF2_HUMAN	HP:0000153	Abnormality of the mouth
IL10_HUMAN	HP:0000153	Abnormality of the mouth
IL23R_HUMAN	HP:0000153	Abnormality of the mouth
ITA8_HUMAN	HP:0000153	Abnormality of the mouth
KCAB2_HUMAN	HP:0000153	Abnormality of the mouth
KLH41_HUMAN	HP:0000153	Abnormality of the mouth
LETM1_HUMAN	HP:0000153	Abnormality of the mouth
LIMK1_HUMAN	HP:0000153	Abnormality of the mouth
LZTL1_HUMAN	HP:0000153	Abnormality of the mouth
MEIS2_HUMAN	HP:0000153	Abnormality of the mouth
MK01_HUMAN	HP:0000153	Abnormality of the mouth
MOC2B_HUMAN	HP:0000153	Abnormality of the mouth
NAGAB_HUMAN	HP:0000153	Abnormality of the mouth
NCKX4_HUMAN	HP:0000153	Abnormality of the mouth
NELFA_HUMAN	HP:0000153	Abnormality of the mouth
NSD2_HUMAN	HP:0000153	Abnormality of the mouth
NU4M_HUMAN	HP:0000153	Abnormality of the mouth
OCLN_HUMAN	HP:0000153	Abnormality of the mouth
PAX1_HUMAN	HP:0000153	Abnormality of the mouth
PCY1A_HUMAN	HP:0000153	Abnormality of the mouth
PDE6D_HUMAN	HP:0000153	Abnormality of the mouth
PEPD_HUMAN	HP:0000153	Abnormality of the mouth
PGAP3_HUMAN	HP:0000153	Abnormality of the mouth
PPBT_HUMAN	HP:0000153	Abnormality of the mouth
PRTN3_HUMAN	HP:0000153	Abnormality of the mouth
PTPRF_HUMAN	HP:0000153	Abnormality of the mouth
PTSS1_HUMAN	HP:0000153	Abnormality of the mouth
PUF60_HUMAN	HP:0000153	Abnormality of the mouth
RFC2_HUMAN	HP:0000153	Abnormality of the mouth
RL15_HUMAN	HP:0000153	Abnormality of the mouth
RS29_HUMAN	HP:0000153	Abnormality of the mouth
SEM5A_HUMAN	HP:0000153	Abnormality of the mouth
SH2B1_HUMAN	HP:0000153	Abnormality of the mouth
SMCE1_HUMAN	HP:0000153	Abnormality of the mouth
SNX3_HUMAN	HP:0000153	Abnormality of the mouth
SOX11_HUMAN	HP:0000153	Abnormality of the mouth
SPEG_HUMAN	HP:0000153	Abnormality of the mouth
SULF1_HUMAN	HP:0000153	Abnormality of the mouth
TBC20_HUMAN	HP:0000153	Abnormality of the mouth
TBL2_HUMAN	HP:0000153	Abnormality of the mouth
TBX2_HUMAN	HP:0000153	Abnormality of the mouth
TBX6_HUMAN	HP:0000153	Abnormality of the mouth
TECT3_HUMAN	HP:0000153	Abnormality of the mouth
TFE2_HUMAN	HP:0000153	Abnormality of the mouth
THTM_HUMAN	HP:0000153	Abnormality of the mouth
TLR4_HUMAN	HP:0000153	Abnormality of the mouth
TNR27_HUMAN	HP:0000153	Abnormality of the mouth
TPC_HUMAN	HP:0000153	Abnormality of the mouth
XYLT1_HUMAN	HP:0000153	Abnormality of the mouth
YAP1_HUMAN	HP:0000153	Abnormality of the mouth
ZBT20_HUMAN	HP:0000153	Abnormality of the mouth
ZDHC9_HUMAN	HP:0000153	Abnormality of the mouth
AT10A_HUMAN	HP:0000154	Wide mouth
BAZ1B_HUMAN	HP:0000154	Wide mouth
CLIP2_HUMAN	HP:0000154	Wide mouth
CYFP1_HUMAN	HP:0000154	Wide mouth
GPC4_HUMAN	HP:0000154	Wide mouth
GT2D1_HUMAN	HP:0000154	Wide mouth
GTF2I_HUMAN	HP:0000154	Wide mouth
LIMK1_HUMAN	HP:0000154	Wide mouth
PTSS1_HUMAN	HP:0000154	Wide mouth
RFC2_HUMAN	HP:0000154	Wide mouth
SMCE1_HUMAN	HP:0000154	Wide mouth
SOX11_HUMAN	HP:0000154	Wide mouth
TBL2_HUMAN	HP:0000154	Wide mouth
AT10A_HUMAN	HP:0000157	Abnormality of the tongue
BAZ1B_HUMAN	HP:0000157	Abnormality of the tongue
C2CD3_HUMAN	HP:0000157	Abnormality of the tongue
CLIP2_HUMAN	HP:0000157	Abnormality of the tongue
CRKL_HUMAN	HP:0000157	Abnormality of the tongue
CYFP1_HUMAN	HP:0000157	Abnormality of the tongue
EDN1_HUMAN	HP:0000157	Abnormality of the tongue
FLII_HUMAN	HP:0000157	Abnormality of the tongue
GPC4_HUMAN	HP:0000157	Abnormality of the tongue
GT2D1_HUMAN	HP:0000157	Abnormality of the tongue
GTF2I_HUMAN	HP:0000157	Abnormality of the tongue
IF4A3_HUMAN	HP:0000157	Abnormality of the tongue
LIMK1_HUMAN	HP:0000157	Abnormality of the tongue
MK01_HUMAN	HP:0000157	Abnormality of the tongue
PDE6D_HUMAN	HP:0000157	Abnormality of the tongue
PTSS1_HUMAN	HP:0000157	Abnormality of the tongue
RFC2_HUMAN	HP:0000157	Abnormality of the tongue
TBL2_HUMAN	HP:0000157	Abnormality of the tongue
TECT3_HUMAN	HP:0000157	Abnormality of the tongue
ADNP_HUMAN	HP:0000159	Abnormal lip morphology
AMMR1_HUMAN	HP:0000159	Abnormal lip morphology
BAZ1B_HUMAN	HP:0000159	Abnormal lip morphology
CLIP2_HUMAN	HP:0000159	Abnormal lip morphology
CLP1_HUMAN	HP:0000159	Abnormal lip morphology
CNTN4_HUMAN	HP:0000159	Abnormal lip morphology
CRKL_HUMAN	HP:0000159	Abnormal lip morphology
DEAF1_HUMAN	HP:0000159	Abnormal lip morphology
FGF20_HUMAN	HP:0000159	Abnormal lip morphology
FLII_HUMAN	HP:0000159	Abnormal lip morphology
FNBP4_HUMAN	HP:0000159	Abnormal lip morphology
GATA5_HUMAN	HP:0000159	Abnormal lip morphology
GPC4_HUMAN	HP:0000159	Abnormal lip morphology
GRHL3_HUMAN	HP:0000159	Abnormal lip morphology
GT2D1_HUMAN	HP:0000159	Abnormal lip morphology
GTF2I_HUMAN	HP:0000159	Abnormal lip morphology
ITA8_HUMAN	HP:0000159	Abnormal lip morphology
LIMK1_HUMAN	HP:0000159	Abnormal lip morphology
MK01_HUMAN	HP:0000159	Abnormal lip morphology
NAGAB_HUMAN	HP:0000159	Abnormal lip morphology
PDE6D_HUMAN	HP:0000159	Abnormal lip morphology
PGAP3_HUMAN	HP:0000159	Abnormal lip morphology
PTSS1_HUMAN	HP:0000159	Abnormal lip morphology
PUF60_HUMAN	HP:0000159	Abnormal lip morphology
RFC2_HUMAN	HP:0000159	Abnormal lip morphology
RL15_HUMAN	HP:0000159	Abnormal lip morphology
RS29_HUMAN	HP:0000159	Abnormal lip morphology
SMCE1_HUMAN	HP:0000159	Abnormal lip morphology
SNX3_HUMAN	HP:0000159	Abnormal lip morphology
SOX11_HUMAN	HP:0000159	Abnormal lip morphology
TBL2_HUMAN	HP:0000159	Abnormal lip morphology
TECT3_HUMAN	HP:0000159	Abnormal lip morphology
TNR27_HUMAN	HP:0000159	Abnormal lip morphology
YAP1_HUMAN	HP:0000159	Abnormal lip morphology
ZBT20_HUMAN	HP:0000159	Abnormal lip morphology
1433E_HUMAN	HP:0000160	Narrow mouth
CCND2_HUMAN	HP:0000160	Narrow mouth
CRKL_HUMAN	HP:0000160	Narrow mouth
FAT4_HUMAN	HP:0000160	Narrow mouth
GBRD_HUMAN	HP:0000160	Narrow mouth
GSC_HUMAN	HP:0000160	Narrow mouth
IF4A3_HUMAN	HP:0000160	Narrow mouth
KCAB2_HUMAN	HP:0000160	Narrow mouth
MK01_HUMAN	HP:0000160	Narrow mouth
SPEG_HUMAN	HP:0000160	Narrow mouth
SULF1_HUMAN	HP:0000160	Narrow mouth
TBC20_HUMAN	HP:0000160	Narrow mouth
TBX2_HUMAN	HP:0000160	Narrow mouth
1433E_HUMAN	HP:0000163	Abnormal oral cavity morphology
ABCA5_HUMAN	HP:0000163	Abnormal oral cavity morphology
ACTH_HUMAN	HP:0000163	Abnormal oral cavity morphology
AGM1_HUMAN	HP:0000163	Abnormal oral cavity morphology
AMMR1_HUMAN	HP:0000163	Abnormal oral cavity morphology
ANO5_HUMAN	HP:0000163	Abnormal oral cavity morphology
ASPH_HUMAN	HP:0000163	Abnormal oral cavity morphology
AT10A_HUMAN	HP:0000163	Abnormal oral cavity morphology
ATRIP_HUMAN	HP:0000163	Abnormal oral cavity morphology
BAZ1B_HUMAN	HP:0000163	Abnormal oral cavity morphology
BIN1_HUMAN	HP:0000163	Abnormal oral cavity morphology
C2CD3_HUMAN	HP:0000163	Abnormal oral cavity morphology
CCR6_HUMAN	HP:0000163	Abnormal oral cavity morphology
CIB2_HUMAN	HP:0000163	Abnormal oral cavity morphology
CLIP2_HUMAN	HP:0000163	Abnormal oral cavity morphology
CLP1_HUMAN	HP:0000163	Abnormal oral cavity morphology
CNTN4_HUMAN	HP:0000163	Abnormal oral cavity morphology
CO4A_HUMAN	HP:0000163	Abnormal oral cavity morphology
COX2_HUMAN	HP:0000163	Abnormal oral cavity morphology
CRKL_HUMAN	HP:0000163	Abnormal oral cavity morphology
CTLA4_HUMAN	HP:0000163	Abnormal oral cavity morphology
CYFP1_HUMAN	HP:0000163	Abnormal oral cavity morphology
DPB1_HUMAN	HP:0000163	Abnormal oral cavity morphology
DPOD1_HUMAN	HP:0000163	Abnormal oral cavity morphology
DPP6_HUMAN	HP:0000163	Abnormal oral cavity morphology
EDN1_HUMAN	HP:0000163	Abnormal oral cavity morphology
FAT4_HUMAN	HP:0000163	Abnormal oral cavity morphology
FGF20_HUMAN	HP:0000163	Abnormal oral cavity morphology
FIBG_HUMAN	HP:0000163	Abnormal oral cavity morphology
FLII_HUMAN	HP:0000163	Abnormal oral cavity morphology
FNBP4_HUMAN	HP:0000163	Abnormal oral cavity morphology
GPC4_HUMAN	HP:0000163	Abnormal oral cavity morphology
GRHL3_HUMAN	HP:0000163	Abnormal oral cavity morphology
GSC_HUMAN	HP:0000163	Abnormal oral cavity morphology
GT2D1_HUMAN	HP:0000163	Abnormal oral cavity morphology
GTF2I_HUMAN	HP:0000163	Abnormal oral cavity morphology
HDAC9_HUMAN	HP:0000163	Abnormal oral cavity morphology
HERC2_HUMAN	HP:0000163	Abnormal oral cavity morphology
I12R2_HUMAN	HP:0000163	Abnormal oral cavity morphology
IF4A3_HUMAN	HP:0000163	Abnormal oral cavity morphology
IGF2_HUMAN	HP:0000163	Abnormal oral cavity morphology
IL10_HUMAN	HP:0000163	Abnormal oral cavity morphology
IL23R_HUMAN	HP:0000163	Abnormal oral cavity morphology
ITA8_HUMAN	HP:0000163	Abnormal oral cavity morphology
KLH41_HUMAN	HP:0000163	Abnormal oral cavity morphology
LETM1_HUMAN	HP:0000163	Abnormal oral cavity morphology
LIMK1_HUMAN	HP:0000163	Abnormal oral cavity morphology
LZTL1_HUMAN	HP:0000163	Abnormal oral cavity morphology
MEIS2_HUMAN	HP:0000163	Abnormal oral cavity morphology
MK01_HUMAN	HP:0000163	Abnormal oral cavity morphology
NAGAB_HUMAN	HP:0000163	Abnormal oral cavity morphology
NCKX4_HUMAN	HP:0000163	Abnormal oral cavity morphology
NELFA_HUMAN	HP:0000163	Abnormal oral cavity morphology
NSD2_HUMAN	HP:0000163	Abnormal oral cavity morphology
NU4M_HUMAN	HP:0000163	Abnormal oral cavity morphology
OCLN_HUMAN	HP:0000163	Abnormal oral cavity morphology
PAX1_HUMAN	HP:0000163	Abnormal oral cavity morphology
PCY1A_HUMAN	HP:0000163	Abnormal oral cavity morphology
PDE6D_HUMAN	HP:0000163	Abnormal oral cavity morphology
PEPD_HUMAN	HP:0000163	Abnormal oral cavity morphology
PGAP3_HUMAN	HP:0000163	Abnormal oral cavity morphology
PPBT_HUMAN	HP:0000163	Abnormal oral cavity morphology
PRTN3_HUMAN	HP:0000163	Abnormal oral cavity morphology
PTSS1_HUMAN	HP:0000163	Abnormal oral cavity morphology
RFC2_HUMAN	HP:0000163	Abnormal oral cavity morphology
RL15_HUMAN	HP:0000163	Abnormal oral cavity morphology
RS29_HUMAN	HP:0000163	Abnormal oral cavity morphology
SEM5A_HUMAN	HP:0000163	Abnormal oral cavity morphology
SH2B1_HUMAN	HP:0000163	Abnormal oral cavity morphology
SMCE1_HUMAN	HP:0000163	Abnormal oral cavity morphology
SOX11_HUMAN	HP:0000163	Abnormal oral cavity morphology
SPEG_HUMAN	HP:0000163	Abnormal oral cavity morphology
SULF1_HUMAN	HP:0000163	Abnormal oral cavity morphology
TBC20_HUMAN	HP:0000163	Abnormal oral cavity morphology
TBL2_HUMAN	HP:0000163	Abnormal oral cavity morphology
TBX2_HUMAN	HP:0000163	Abnormal oral cavity morphology
TBX6_HUMAN	HP:0000163	Abnormal oral cavity morphology
TECT3_HUMAN	HP:0000163	Abnormal oral cavity morphology
TFE2_HUMAN	HP:0000163	Abnormal oral cavity morphology
THTM_HUMAN	HP:0000163	Abnormal oral cavity morphology
TLR4_HUMAN	HP:0000163	Abnormal oral cavity morphology
TNR27_HUMAN	HP:0000163	Abnormal oral cavity morphology
TPC_HUMAN	HP:0000163	Abnormal oral cavity morphology
XYLT1_HUMAN	HP:0000163	Abnormal oral cavity morphology
YAP1_HUMAN	HP:0000163	Abnormal oral cavity morphology
ZBT20_HUMAN	HP:0000163	Abnormal oral cavity morphology
ZDHC9_HUMAN	HP:0000163	Abnormal oral cavity morphology
ABCA5_HUMAN	HP:0000164	Abnormality of the dentition
AMMR1_HUMAN	HP:0000164	Abnormality of the dentition
ANO5_HUMAN	HP:0000164	Abnormality of the dentition
ASPH_HUMAN	HP:0000164	Abnormality of the dentition
AT10A_HUMAN	HP:0000164	Abnormality of the dentition
ATRIP_HUMAN	HP:0000164	Abnormality of the dentition
BAZ1B_HUMAN	HP:0000164	Abnormality of the dentition
C2CD3_HUMAN	HP:0000164	Abnormality of the dentition
CCR6_HUMAN	HP:0000164	Abnormality of the dentition
CIB2_HUMAN	HP:0000164	Abnormality of the dentition
CLIP2_HUMAN	HP:0000164	Abnormality of the dentition
COX2_HUMAN	HP:0000164	Abnormality of the dentition
CYFP1_HUMAN	HP:0000164	Abnormality of the dentition
DPOD1_HUMAN	HP:0000164	Abnormality of the dentition
DPP6_HUMAN	HP:0000164	Abnormality of the dentition
FAT4_HUMAN	HP:0000164	Abnormality of the dentition
FLII_HUMAN	HP:0000164	Abnormality of the dentition
GRHL3_HUMAN	HP:0000164	Abnormality of the dentition
GT2D1_HUMAN	HP:0000164	Abnormality of the dentition
GTF2I_HUMAN	HP:0000164	Abnormality of the dentition
HDAC9_HUMAN	HP:0000164	Abnormality of the dentition
IF4A3_HUMAN	HP:0000164	Abnormality of the dentition
IGF2_HUMAN	HP:0000164	Abnormality of the dentition
LETM1_HUMAN	HP:0000164	Abnormality of the dentition
LIMK1_HUMAN	HP:0000164	Abnormality of the dentition
LZTL1_HUMAN	HP:0000164	Abnormality of the dentition
MEIS2_HUMAN	HP:0000164	Abnormality of the dentition
NCKX4_HUMAN	HP:0000164	Abnormality of the dentition
NELFA_HUMAN	HP:0000164	Abnormality of the dentition
NSD2_HUMAN	HP:0000164	Abnormality of the dentition
NU4M_HUMAN	HP:0000164	Abnormality of the dentition
PAX1_HUMAN	HP:0000164	Abnormality of the dentition
PCY1A_HUMAN	HP:0000164	Abnormality of the dentition
PEPD_HUMAN	HP:0000164	Abnormality of the dentition
PPBT_HUMAN	HP:0000164	Abnormality of the dentition
PTSS1_HUMAN	HP:0000164	Abnormality of the dentition
RFC2_HUMAN	HP:0000164	Abnormality of the dentition
SMCE1_HUMAN	HP:0000164	Abnormality of the dentition
SOX11_HUMAN	HP:0000164	Abnormality of the dentition
TBL2_HUMAN	HP:0000164	Abnormality of the dentition
TBX2_HUMAN	HP:0000164	Abnormality of the dentition
TNR27_HUMAN	HP:0000164	Abnormality of the dentition
ZDHC9_HUMAN	HP:0000164	Abnormality of the dentition
ABCA5_HUMAN	HP:0000168	Abnormality of the gingiva
BAZ1B_HUMAN	HP:0000168	Abnormality of the gingiva
CLIP2_HUMAN	HP:0000168	Abnormality of the gingiva
COX2_HUMAN	HP:0000168	Abnormality of the gingiva
FAT4_HUMAN	HP:0000168	Abnormality of the gingiva
FIBG_HUMAN	HP:0000168	Abnormality of the gingiva
GT2D1_HUMAN	HP:0000168	Abnormality of the gingiva
GTF2I_HUMAN	HP:0000168	Abnormality of the gingiva
LIMK1_HUMAN	HP:0000168	Abnormality of the gingiva
NU4M_HUMAN	HP:0000168	Abnormality of the gingiva
RFC2_HUMAN	HP:0000168	Abnormality of the gingiva
TBL2_HUMAN	HP:0000168	Abnormality of the gingiva
1433E_HUMAN	HP:0000174	Abnormal palate morphology
ACTH_HUMAN	HP:0000174	Abnormal palate morphology
AGM1_HUMAN	HP:0000174	Abnormal palate morphology
BIN1_HUMAN	HP:0000174	Abnormal palate morphology
C2CD3_HUMAN	HP:0000174	Abnormal palate morphology
CLP1_HUMAN	HP:0000174	Abnormal palate morphology
CNTN4_HUMAN	HP:0000174	Abnormal palate morphology
CRKL_HUMAN	HP:0000174	Abnormal palate morphology
EDN1_HUMAN	HP:0000174	Abnormal palate morphology
FAT4_HUMAN	HP:0000174	Abnormal palate morphology
FGF20_HUMAN	HP:0000174	Abnormal palate morphology
FLII_HUMAN	HP:0000174	Abnormal palate morphology
FNBP4_HUMAN	HP:0000174	Abnormal palate morphology
GPC4_HUMAN	HP:0000174	Abnormal palate morphology
GRHL3_HUMAN	HP:0000174	Abnormal palate morphology
GSC_HUMAN	HP:0000174	Abnormal palate morphology
HERC2_HUMAN	HP:0000174	Abnormal palate morphology
IF4A3_HUMAN	HP:0000174	Abnormal palate morphology
ITA8_HUMAN	HP:0000174	Abnormal palate morphology
KLH41_HUMAN	HP:0000174	Abnormal palate morphology
LETM1_HUMAN	HP:0000174	Abnormal palate morphology
LZTL1_HUMAN	HP:0000174	Abnormal palate morphology
MEIS2_HUMAN	HP:0000174	Abnormal palate morphology
MK01_HUMAN	HP:0000174	Abnormal palate morphology
NELFA_HUMAN	HP:0000174	Abnormal palate morphology
NSD2_HUMAN	HP:0000174	Abnormal palate morphology
OCLN_HUMAN	HP:0000174	Abnormal palate morphology
PAX1_HUMAN	HP:0000174	Abnormal palate morphology
PDE6D_HUMAN	HP:0000174	Abnormal palate morphology
PGAP3_HUMAN	HP:0000174	Abnormal palate morphology
PTSS1_HUMAN	HP:0000174	Abnormal palate morphology
RL15_HUMAN	HP:0000174	Abnormal palate morphology
RS29_HUMAN	HP:0000174	Abnormal palate morphology
SEM5A_HUMAN	HP:0000174	Abnormal palate morphology
SH2B1_HUMAN	HP:0000174	Abnormal palate morphology
SMCE1_HUMAN	HP:0000174	Abnormal palate morphology
SOX11_HUMAN	HP:0000174	Abnormal palate morphology
SPEG_HUMAN	HP:0000174	Abnormal palate morphology
SULF1_HUMAN	HP:0000174	Abnormal palate morphology
TBC20_HUMAN	HP:0000174	Abnormal palate morphology
TBX6_HUMAN	HP:0000174	Abnormal palate morphology
TECT3_HUMAN	HP:0000174	Abnormal palate morphology
TFE2_HUMAN	HP:0000174	Abnormal palate morphology
THTM_HUMAN	HP:0000174	Abnormal palate morphology
TPC_HUMAN	HP:0000174	Abnormal palate morphology
XYLT1_HUMAN	HP:0000174	Abnormal palate morphology
YAP1_HUMAN	HP:0000174	Abnormal palate morphology
ZBT20_HUMAN	HP:0000174	Abnormal palate morphology
ZDHC9_HUMAN	HP:0000174	Abnormal palate morphology
ACTH_HUMAN	HP:0000175	Cleft palate
C2CD3_HUMAN	HP:0000175	Cleft palate
CNTN4_HUMAN	HP:0000175	Cleft palate
CRKL_HUMAN	HP:0000175	Cleft palate
FGF20_HUMAN	HP:0000175	Cleft palate
FLII_HUMAN	HP:0000175	Cleft palate
FNBP4_HUMAN	HP:0000175	Cleft palate
GPC4_HUMAN	HP:0000175	Cleft palate
GRHL3_HUMAN	HP:0000175	Cleft palate
IF4A3_HUMAN	HP:0000175	Cleft palate
ITA8_HUMAN	HP:0000175	Cleft palate
KLH41_HUMAN	HP:0000175	Cleft palate
LETM1_HUMAN	HP:0000175	Cleft palate
MEIS2_HUMAN	HP:0000175	Cleft palate
MK01_HUMAN	HP:0000175	Cleft palate
NELFA_HUMAN	HP:0000175	Cleft palate
NSD2_HUMAN	HP:0000175	Cleft palate
PDE6D_HUMAN	HP:0000175	Cleft palate
PGAP3_HUMAN	HP:0000175	Cleft palate
PTSS1_HUMAN	HP:0000175	Cleft palate
RL15_HUMAN	HP:0000175	Cleft palate
RS29_HUMAN	HP:0000175	Cleft palate
SH2B1_HUMAN	HP:0000175	Cleft palate
SMCE1_HUMAN	HP:0000175	Cleft palate
SOX11_HUMAN	HP:0000175	Cleft palate
TBX6_HUMAN	HP:0000175	Cleft palate
TECT3_HUMAN	HP:0000175	Cleft palate
XYLT1_HUMAN	HP:0000175	Cleft palate
YAP1_HUMAN	HP:0000175	Cleft palate
ADNP_HUMAN	HP:0000177	Abnormality of upper lip
CLP1_HUMAN	HP:0000177	Abnormality of upper lip
FGF20_HUMAN	HP:0000177	Abnormality of upper lip
FLII_HUMAN	HP:0000177	Abnormality of upper lip
FNBP4_HUMAN	HP:0000177	Abnormality of upper lip
GPC4_HUMAN	HP:0000177	Abnormality of upper lip
GRHL3_HUMAN	HP:0000177	Abnormality of upper lip
ITA8_HUMAN	HP:0000177	Abnormality of upper lip
PDE6D_HUMAN	HP:0000177	Abnormality of upper lip
PGAP3_HUMAN	HP:0000177	Abnormality of upper lip
PUF60_HUMAN	HP:0000177	Abnormality of upper lip
SNX3_HUMAN	HP:0000177	Abnormality of upper lip
TECT3_HUMAN	HP:0000177	Abnormality of upper lip
YAP1_HUMAN	HP:0000177	Abnormality of upper lip
AMMR1_HUMAN	HP:0000178	Abnormality of lower lip
BAZ1B_HUMAN	HP:0000178	Abnormality of lower lip
CLIP2_HUMAN	HP:0000178	Abnormality of lower lip
DEAF1_HUMAN	HP:0000178	Abnormality of lower lip
GT2D1_HUMAN	HP:0000178	Abnormality of lower lip
GTF2I_HUMAN	HP:0000178	Abnormality of lower lip
LIMK1_HUMAN	HP:0000178	Abnormality of lower lip
NAGAB_HUMAN	HP:0000178	Abnormality of lower lip
PTSS1_HUMAN	HP:0000178	Abnormality of lower lip
RFC2_HUMAN	HP:0000178	Abnormality of lower lip
RL15_HUMAN	HP:0000178	Abnormality of lower lip
RS29_HUMAN	HP:0000178	Abnormality of lower lip
SMCE1_HUMAN	HP:0000178	Abnormality of lower lip
SOX11_HUMAN	HP:0000178	Abnormality of lower lip
TBL2_HUMAN	HP:0000178	Abnormality of lower lip
TNR27_HUMAN	HP:0000178	Abnormality of lower lip
ZBT20_HUMAN	HP:0000178	Abnormality of lower lip
AMMR1_HUMAN	HP:0000179	Thick lower lip vermilion
BAZ1B_HUMAN	HP:0000179	Thick lower lip vermilion
CLIP2_HUMAN	HP:0000179	Thick lower lip vermilion
DEAF1_HUMAN	HP:0000179	Thick lower lip vermilion
GT2D1_HUMAN	HP:0000179	Thick lower lip vermilion
GTF2I_HUMAN	HP:0000179	Thick lower lip vermilion
LIMK1_HUMAN	HP:0000179	Thick lower lip vermilion
NAGAB_HUMAN	HP:0000179	Thick lower lip vermilion
PTSS1_HUMAN	HP:0000179	Thick lower lip vermilion
RFC2_HUMAN	HP:0000179	Thick lower lip vermilion
RL15_HUMAN	HP:0000179	Thick lower lip vermilion
RS29_HUMAN	HP:0000179	Thick lower lip vermilion
SMCE1_HUMAN	HP:0000179	Thick lower lip vermilion
SOX11_HUMAN	HP:0000179	Thick lower lip vermilion
TBL2_HUMAN	HP:0000179	Thick lower lip vermilion
ZBT20_HUMAN	HP:0000179	Thick lower lip vermilion
ACTH_HUMAN	HP:0000202	Oral cleft
C2CD3_HUMAN	HP:0000202	Oral cleft
CNTN4_HUMAN	HP:0000202	Oral cleft
CRKL_HUMAN	HP:0000202	Oral cleft
CSPP1_HUMAN	HP:0000202	Oral cleft
FGF20_HUMAN	HP:0000202	Oral cleft
FLII_HUMAN	HP:0000202	Oral cleft
FNBP4_HUMAN	HP:0000202	Oral cleft
GPC4_HUMAN	HP:0000202	Oral cleft
GRHL3_HUMAN	HP:0000202	Oral cleft
IF4A3_HUMAN	HP:0000202	Oral cleft
ITA8_HUMAN	HP:0000202	Oral cleft
KLH41_HUMAN	HP:0000202	Oral cleft
LETM1_HUMAN	HP:0000202	Oral cleft
MEIS2_HUMAN	HP:0000202	Oral cleft
MK01_HUMAN	HP:0000202	Oral cleft
NELFA_HUMAN	HP:0000202	Oral cleft
NSD2_HUMAN	HP:0000202	Oral cleft
PDE6D_HUMAN	HP:0000202	Oral cleft
PGAP3_HUMAN	HP:0000202	Oral cleft
PTSS1_HUMAN	HP:0000202	Oral cleft
RL15_HUMAN	HP:0000202	Oral cleft
RS29_HUMAN	HP:0000202	Oral cleft
SH2B1_HUMAN	HP:0000202	Oral cleft
SMCE1_HUMAN	HP:0000202	Oral cleft
SNX3_HUMAN	HP:0000202	Oral cleft
SOX11_HUMAN	HP:0000202	Oral cleft
TBX6_HUMAN	HP:0000202	Oral cleft
TECT3_HUMAN	HP:0000202	Oral cleft
XYLT1_HUMAN	HP:0000202	Oral cleft
YAP1_HUMAN	HP:0000202	Oral cleft
FGF20_HUMAN	HP:0000204	Cleft upper lip
FLII_HUMAN	HP:0000204	Cleft upper lip
FNBP4_HUMAN	HP:0000204	Cleft upper lip
GPC4_HUMAN	HP:0000204	Cleft upper lip
GRHL3_HUMAN	HP:0000204	Cleft upper lip
ITA8_HUMAN	HP:0000204	Cleft upper lip
PDE6D_HUMAN	HP:0000204	Cleft upper lip
SNX3_HUMAN	HP:0000204	Cleft upper lip
TECT3_HUMAN	HP:0000204	Cleft upper lip
YAP1_HUMAN	HP:0000204	Cleft upper lip
ABCA5_HUMAN	HP:0000212	Gingival overgrowth
BAZ1B_HUMAN	HP:0000212	Gingival overgrowth
CLIP2_HUMAN	HP:0000212	Gingival overgrowth
COX2_HUMAN	HP:0000212	Gingival overgrowth
FAT4_HUMAN	HP:0000212	Gingival overgrowth
GT2D1_HUMAN	HP:0000212	Gingival overgrowth
GTF2I_HUMAN	HP:0000212	Gingival overgrowth
LIMK1_HUMAN	HP:0000212	Gingival overgrowth
NU4M_HUMAN	HP:0000212	Gingival overgrowth
RFC2_HUMAN	HP:0000212	Gingival overgrowth
TBL2_HUMAN	HP:0000212	Gingival overgrowth
AGM1_HUMAN	HP:0000218	High palate
BIN1_HUMAN	HP:0000218	High palate
CLP1_HUMAN	HP:0000218	High palate
FAT4_HUMAN	HP:0000218	High palate
GSC_HUMAN	HP:0000218	High palate
IF4A3_HUMAN	HP:0000218	High palate
KLH41_HUMAN	HP:0000218	High palate
LZTL1_HUMAN	HP:0000218	High palate
OCLN_HUMAN	HP:0000218	High palate
SPEG_HUMAN	HP:0000218	High palate
TECT3_HUMAN	HP:0000218	High palate
1433E_HUMAN	HP:0000234	Abnormality of the head
ABCA5_HUMAN	HP:0000234	Abnormality of the head
ACHA7_HUMAN	HP:0000234	Abnormality of the head
ACTH_HUMAN	HP:0000234	Abnormality of the head
ADNP_HUMAN	HP:0000234	Abnormality of the head
AGGF1_HUMAN	HP:0000234	Abnormality of the head
AGM1_HUMAN	HP:0000234	Abnormality of the head
AMMR1_HUMAN	HP:0000234	Abnormality of the head
AMPD2_HUMAN	HP:0000234	Abnormality of the head
ANO5_HUMAN	HP:0000234	Abnormality of the head
ARNT2_HUMAN	HP:0000234	Abnormality of the head
ASPH_HUMAN	HP:0000234	Abnormality of the head
AT10A_HUMAN	HP:0000234	Abnormality of the head
ATOH7_HUMAN	HP:0000234	Abnormality of the head
ATRIP_HUMAN	HP:0000234	Abnormality of the head
BAZ1B_HUMAN	HP:0000234	Abnormality of the head
BIN1_HUMAN	HP:0000234	Abnormality of the head
BMS1_HUMAN	HP:0000234	Abnormality of the head
C2CD3_HUMAN	HP:0000234	Abnormality of the head
[truncated: 15,391 more rows]
