# Supplementary material for: Integration of Human Protein Sequence and Protein-Protein Interaction Data by Graph Autoencoder to Identify Novel Protein-Abnormal Phenotype Associations
Source: Cells. 2022 Aug 10;11(16):2485. doi: 10.3390/cells11162485 (PMC9406402; doi:10.3390/cells11162485)
Supplement: Supplementary file 1 [file cells-11-02485-s001.zip › Supplementary Table S3.xlsx]

## Sheet: Table S3
Supplementary Table S3. Relationship between amino acids and CT classes.
20 kinds of amino acids are clustered into 7 classes according to the dipoles and volumes of the side chains. Then all the amino acids in the same class are considered identical. The conjoint triad considers the properties of one amino acid and its vicinal amino acids and regarded any three continuous amino acids as a unit.
CT Class	amino acid
C1	Ala, Gly, Val
C2	Ile, Leu, Phe, Pro
C3	Tyr, Met, Thr, Ser
C4	His, Asn, Gln, Trp
C5	Arg, Lys
C6	Asp, Glu
C7	Cys
