# Supplementary material for: Integration of Human Protein Sequence and Protein-Protein Interaction Data by Graph Autoencoder to Identify Novel Protein-Abnormal Phenotype Associations
Source: Cells. 2022 Aug 10;11(16):2485. doi: 10.3390/cells11162485 (PMC9406402; doi:10.3390/cells11162485)
Supplement: Supplementary file 1 [file cells-11-02485-s001.zip › Supplementary Table S4.xlsx]

## Sheet: Table S4
Supplementary Table S4. TOP150 prioritized HP:0008972 (Decreased mitochondrial respiratory chain activity) associated genes.
Uniprot ID	Gene Symbol	Entrez Gene ID	Protein names	Score	Rank	Predicted Term Identifier	Term Name
P51970	NDUFA8	4702	NADH dehydrogenase [ubiquinone] 1 alpha subcomplex subunit 8 (Complex I-19kD) (CI-19kD) (Complex I-PGIV) (CI-PGIV) (NADH-ubiquinone oxidoreductase 19 kDa subunit)	0.88	1	HP0008972	Decreased mitochondrial respiratory chain activity
P17568	NDUFB7	4713	NADH dehydrogenase [ubiquinone] 1 beta subcomplex subunit 7 (Cell adhesion protein SQM1) (Complex I-B18) (CI-B18) (NADH-ubiquinone oxidoreductase B18 subunit)	0.86	2	HP0008972	Decreased mitochondrial respiratory chain activity
P14854	COX6B1 COX6B	1340	Cytochrome c oxidase subunit 6B1 (Cytochrome c oxidase subunit VIb isoform 1) (COX VIb-1)	0.86	3	HP0008972	Decreased mitochondrial respiratory chain activity
O43674	NDUFB5	4711	NADH dehydrogenase [ubiquinone] 1 beta subcomplex subunit 5, mitochondrial (Complex I-SGDH) (CI-SGDH) (NADH-ubiquinone oxidoreductase SGDH subunit)	0.86	4	HP0008972	Decreased mitochondrial respiratory chain activity
O14957	UQCR11 UQCR	10975	Cytochrome b-c1 complex subunit 10 (Complex III subunit 10) (Complex III subunit XI) (Ubiquinol-cytochrome c reductase complex 6.4 kDa protein)	0.84	5	HP0008972	Decreased mitochondrial respiratory chain activity
O14949	UQCRQ	27089	Cytochrome b-c1 complex subunit 8 (Complex III subunit 8) (Complex III subunit VIII) (Ubiquinol-cytochrome c reductase complex 9.5 kDa protein) (Ubiquinol-cytochrome c reductase complex ubiquinone-binding protein QP-C)	0.84	6	HP0008972	Decreased mitochondrial respiratory chain activity
O95139	NDUFB6	4712	NADH dehydrogenase [ubiquinone] 1 beta subcomplex subunit 6 (Complex I-B17) (CI-B17) (NADH-ubiquinone oxidoreductase B17 subunit)	0.84	7	HP0008972	Decreased mitochondrial respiratory chain activity
P07919	UQCRH	7388	Cytochrome b-c1 complex subunit 6, mitochondrial (Complex III subunit 6) (Complex III subunit VIII) (Cytochrome c1 non-heme 11 kDa protein) (Mitochondrial hinge protein) (Ubiquinol-cytochrome c reductase complex 11 kDa protein)	0.83	8	HP0008972	Decreased mitochondrial respiratory chain activity
Q9UDW1	UQCR10 UCRC HSPC119	29796	Cytochrome b-c1 complex subunit 9 (Complex III subunit 9) (Complex III subunit X) (Cytochrome c1 non-heme 7 kDa protein) (Ubiquinol-cytochrome c reductase complex 7.2 kDa protein)	0.83	9	HP0008972	Decreased mitochondrial respiratory chain activity
Q16718	NDUFA5	4698	NADH dehydrogenase [ubiquinone] 1 alpha subcomplex subunit 5 (Complex I subunit B13) (Complex I-13kD-B) (CI-13kD-B) (NADH-ubiquinone oxidoreductase 13 kDa-B subunit)	0.83	10	HP0008972	Decreased mitochondrial respiratory chain activity
O43920	NDUFS5	4725	NADH dehydrogenase [ubiquinone] iron-sulfur protein 5 (Complex I-15 kDa) (CI-15 kDa) (NADH-ubiquinone oxidoreductase 15 kDa subunit)	0.83	11	HP0008972	Decreased mitochondrial respiratory chain activity
P14927	UQCRB UQBP	7381	Cytochrome b-c1 complex subunit 7 (Complex III subunit 7) (Complex III subunit VII) (QP-C) (Ubiquinol-cytochrome c reductase complex 14 kDa protein)	0.83	12	HP0008972	Decreased mitochondrial respiratory chain activity
O95169	NDUFB8	4714	NADH dehydrogenase [ubiquinone] 1 beta subcomplex subunit 8, mitochondrial (Complex I-ASHI) (CI-ASHI) (NADH-ubiquinone oxidoreductase ASHI subunit)	0.83	13	HP0008972	Decreased mitochondrial respiratory chain activity
O95167	NDUFA3	4696	NADH dehydrogenase [ubiquinone] 1 alpha subcomplex subunit 3 (Complex I-B9) (CI-B9) (NADH-ubiquinone oxidoreductase B9 subunit)	0.82	14	HP0008972	Decreased mitochondrial respiratory chain activity
Q5JTJ3	COA6 C1orf31	388753	Cytochrome c oxidase assembly factor 6 homolog	0.82	15	HP0008972	Decreased mitochondrial respiratory chain activity
P10606	COX5B	1329	Cytochrome c oxidase subunit 5B, mitochondrial (Cytochrome c oxidase polypeptide Vb)	0.82	16	HP0008972	Decreased mitochondrial respiratory chain activity
O75438	NDUFB1	4707	NADH dehydrogenase [ubiquinone] 1 beta subcomplex subunit 1 (Complex I-MNLL) (CI-MNLL) (NADH-ubiquinone oxidoreductase MNLL subunit)	0.81	17	HP0008972	Decreased mitochondrial respiratory chain activity
O95182	NDUFA7	4701	NADH dehydrogenase [ubiquinone] 1 alpha subcomplex subunit 7 (Complex I-B14.5a) (CI-B14.5a) (NADH-ubiquinone oxidoreductase subunit B14.5a)	0.81	18	HP0008972	Decreased mitochondrial respiratory chain activity
O95168	NDUFB4	4710	NADH dehydrogenase [ubiquinone] 1 beta subcomplex subunit 4 (Complex I-B15) (CI-B15) (NADH-ubiquinone oxidoreductase B15 subunit)	0.81	19	HP0008972	Decreased mitochondrial respiratory chain activity
P09669	COX6C	1345	Cytochrome c oxidase subunit 6C (Cytochrome c oxidase polypeptide VIc)	0.8	20	HP0008972	Decreased mitochondrial respiratory chain activity
P24311	COX7B	1349	Cytochrome c oxidase subunit 7B, mitochondrial (Cytochrome c oxidase polypeptide VIIb)	0.8	21	HP0008972	Decreased mitochondrial respiratory chain activity
O43677	NDUFC1	4717	NADH dehydrogenase [ubiquinone] 1 subunit C1, mitochondrial (Complex I-KFYI) (CI-KFYI) (NADH-ubiquinone oxidoreductase KFYI subunit)	0.8	22	HP0008972	Decreased mitochondrial respiratory chain activity
E9PQ53	NDUFC2-KCTD14	100532726	NADH dehydrogenase [ubiquinone] 1 subunit C2, isoform 2 (NDUFC2-KCTD14 readthrough transcript protein)	0.8	23	HP0008972	Decreased mitochondrial respiratory chain activity
P48201	ATP5MC3 ATP5G3	518	ATP synthase F(0) complex subunit C3, mitochondrial (ATP synthase lipid-binding protein) (ATP synthase membrane subunit c locus 3) (ATP synthase proteolipid P3) (ATP synthase proton-transporting mitochondrial F(0) complex subunit C3) (ATPase protein 9) (ATPase subunit c)	0.8	24	HP0008972	Decreased mitochondrial respiratory chain activity
P05496	ATP5MC1 ATP5G1	516	ATP synthase F(0) complex subunit C1, mitochondrial (ATP synthase lipid-binding protein) (ATP synthase membrane subunit c locus 1) (ATP synthase proteolipid P1) (ATP synthase proton-transporting mitochondrial F(0) complex subunit C1) (ATPase protein 9) (ATPase subunit c)	0.79	25	HP0008972	Decreased mitochondrial respiratory chain activity
P14406	COX7A2 COX7AL	1347	Cytochrome c oxidase subunit 7A2, mitochondrial (Cytochrome c oxidase subunit VIIa-liver/heart) (Cytochrome c oxidase subunit VIIa-L) (Cytochrome c oxidase subunit VIIaL)	0.78	26	HP0008972	Decreased mitochondrial respiratory chain activity
P56385	ATP5ME ATP5I ATP5K	521	ATP synthase subunit e, mitochondrial (ATPase subunit e) (ATP synthase membrane subunit e) [Cleaved into: ATP synthase subunit e, mitochondrial, N-terminally processed]	0.78	27	HP0008972	Decreased mitochondrial respiratory chain activity
Q96I36	COX14 C12orf62	84987	Cytochrome c oxidase assembly protein COX14	0.78	28	HP0008972	Decreased mitochondrial respiratory chain activity
Q6YFQ2	COX6B2	125965	Cytochrome c oxidase subunit 6B2 (Cancer/testis antigen 59) (CT59) (Cytochrome c oxidase subunit VIb isoform 2) (COX VIb-2) (Cytochrome c oxidase subunit VIb, testis-specific isoform)	0.77	29	HP0008972	Decreased mitochondrial respiratory chain activity
P56134	ATP5MF ATP5J2 ATP5JL	9551	ATP synthase subunit f, mitochondrial (ATP synthase membrane subunit f)	0.77	30	HP0008972	Decreased mitochondrial respiratory chain activity
P15954	COX7C	1350	Cytochrome c oxidase subunit 7C, mitochondrial (Cytochrome c oxidase polypeptide VIIc)	0.77	31	HP0008972	Decreased mitochondrial respiratory chain activity
P56181	NDUFV3	4731	NADH dehydrogenase [ubiquinone] flavoprotein 3, mitochondrial (Complex I-9kD) (CI-9kD) (NADH-ubiquinone oxidoreductase 9 kDa subunit) (Renal carcinoma antigen NY-REN-4)	0.77	32	HP0008972	Decreased mitochondrial respiratory chain activity
P03915	MT-ND5 MTND5 NADH5 ND5	4540	NADH-ubiquinone oxidoreductase chain 5 (EC 7.1.1.2) (NADH dehydrogenase subunit 5)	0.77	33	HP0008972	Decreased mitochondrial respiratory chain activity
P12074	COX6A1 COX6AL	1337	Cytochrome c oxidase subunit 6A1, mitochondrial (Cytochrome c oxidase polypeptide VIa-liver) (Cytochrome c oxidase subunit VIA-liver) (COX VIa-L)	0.77	34	HP0008972	Decreased mitochondrial respiratory chain activity
Q96KJ9	COX4I2 COX4L2	84701	Cytochrome c oxidase subunit 4 isoform 2, mitochondrial (Cytochrome c oxidase subunit IV isoform 2) (COX IV-2)	0.77	35	HP0008972	Decreased mitochondrial respiratory chain activity
Q7Z4Y8	ATP5MGL ATP5K2 ATP5L2	267020	Putative ATP synthase subunit g 2, mitochondrial (ATPase subunit g 2) (ATP synthase membrane subunit g-like protein)	0.77	36	HP0008972	Decreased mitochondrial respiratory chain activity
O14548	COX7A2L COX7AR COX7RP	9167	Cytochrome c oxidase subunit 7A-related protein, mitochondrial (COX7a-related protein) (Cytochrome c oxidase subunit VIIa-related protein) (EB1)	0.76	37	HP0008972	Decreased mitochondrial respiratory chain activity
O95178	NDUFB2	4708	NADH dehydrogenase [ubiquinone] 1 beta subcomplex subunit 2, mitochondrial (Complex I-AGGG) (CI-AGGG) (NADH-ubiquinone oxidoreductase AGGG subunit)	0.76	38	HP0008972	Decreased mitochondrial respiratory chain activity
Q06055	ATP5MC2 ATP5G2 PSEC0033	517	ATP synthase F(0) complex subunit C2, mitochondrial (ATP synthase lipid-binding protein) (ATP synthase membrane subunit c locus 2) (ATP synthase proteolipid P2) (ATP synthase proton-transporting mitochondrial F(0) complex subunit C2) (ATPase protein 9) (ATPase subunit c)	0.76	39	HP0008972	Decreased mitochondrial respiratory chain activity
O75964	ATP5MG ATP5L	10632	ATP synthase subunit g, mitochondrial (ATPase subunit g) (ATP synthase membrane subunit g)	0.76	40	HP0008972	Decreased mitochondrial respiratory chain activity
O75880	SCO1 SCOD1	6341	Protein SCO1 homolog, mitochondrial	0.75	41	HP0008972	Decreased mitochondrial respiratory chain activity
Q8N8Q8	COX18 OXA1L2	285521	Cytochrome c oxidase assembly protein COX18, mitochondrial (COX18Hs) (Cytochrome c oxidase assembly protein 18)	0.75	42	HP0008972	Decreased mitochondrial respiratory chain activity
P03905	MT-ND4 MTND4 NADH4 ND4	4538	NADH-ubiquinone oxidoreductase chain 4 (EC 7.1.1.2) (NADH dehydrogenase subunit 4)	0.74	43	HP0008972	Decreased mitochondrial respiratory chain activity
Q15070	OXA1L	5018	Mitochondrial inner membrane protein OXA1L (Hsa) (OXA1Hs) (Oxidase assembly 1-like protein) (OXA1-like protein)	0.74	44	HP0008972	Decreased mitochondrial respiratory chain activity
Q9Y3D3	MRPS16 RPMS16 CGI-132	51021	28S ribosomal protein S16, mitochondrial (MRP-S16) (S16mt) (Mitochondrial small ribosomal subunit protein bS16m)	0.74	45	HP0008972	Decreased mitochondrial respiratory chain activity
Q12887	COX10	1352	Protoheme IX farnesyltransferase, mitochondrial (EC 2.5.1.141) (Heme O synthase)	0.74	46	HP0008972	Decreased mitochondrial respiratory chain activity
Q9NRX3	NDUFA4L2	56901	NADH dehydrogenase [ubiquinone] 1 alpha subcomplex subunit 4-like 2 (NADH-ubiquinone oxidoreductase MLRQ subunit homolog) (NUOMS)	0.73	47	HP0008972	Decreased mitochondrial respiratory chain activity
O75439	PMPCB MPPB	9512	Mitochondrial-processing peptidase subunit beta (EC 3.4.24.64) (Beta-MPP) (P-52)	0.71	48	HP0008972	Decreased mitochondrial respiratory chain activity
A0A096LP55	UQCRHL	440567	Cytochrome b-c1 complex subunit 6-like, mitochondrial	0.71	49	HP0008972	Decreased mitochondrial respiratory chain activity
Q96IX5	ATP5MK ATP5MD DAPIT HCVFTP2 USMG5 PD04912	84833	ATP synthase membrane subunit K, mitochondrial (ATP synthase membrane subunit DAPIT, mitochondrial) (Diabetes-associated protein in insulin-sensitive tissues) (HCV F-transactivated protein 2) (Up-regulated during skeletal muscle growth protein 5)	0.71	50	HP0008972	Decreased mitochondrial respiratory chain activity
Q96EH3	MALSU1 C7orf30	115416	Mitochondrial assembly of ribosomal large subunit protein 1	0.71	51	HP0008972	Decreased mitochondrial respiratory chain activity
P03923	MT-ND6 MTND6 NADH6 ND6	4541	NADH-ubiquinone oxidoreductase chain 6 (EC 7.1.1.2) (NADH dehydrogenase subunit 6)	0.7	52	HP0008972	Decreased mitochondrial respiratory chain activity
P24539	ATP5PB ATP5F1	515	ATP synthase F(0) complex subunit B1, mitochondrial (ATP synthase peripheral stalk-membrane subunit b) (ATP synthase proton-transporting mitochondrial F(0) complex subunit B1) (ATP synthase subunit b) (ATPase subunit b)	0.7	53	HP0008972	Decreased mitochondrial respiratory chain activity
Q14061	COX17	10063	Cytochrome c oxidase copper chaperone	0.69	54	HP0008972	Decreased mitochondrial respiratory chain activity
Q9P0M9	MRPL27 HSPC250	51264	39S ribosomal protein L27, mitochondrial (L27mt) (MRP-L27) (Mitochondrial large ribosomal subunit protein bL27m)	0.69	55	HP0008972	Decreased mitochondrial respiratory chain activity
P48047	ATP5PO ATP5O ATPO	539	ATP synthase subunit O, mitochondrial (ATP synthase peripheral stalk subunit OSCP) (Oligomycin sensitivity conferral protein) (OSCP)	0.68	56	HP0008972	Decreased mitochondrial respiratory chain activity
Q9BZE1	MRPL37 MRPL2 RPML2 HSPC235	51253	39S ribosomal protein L37, mitochondrial (L37mt) (MRP-L37) (39S ribosomal protein L2, mitochondrial) (L2mt) (MRP-L2) (Mitochondrial large ribosomal subunit protein mL37)	0.68	57	HP0008972	Decreased mitochondrial respiratory chain activity
P31930	UQCRC1	7384	Cytochrome b-c1 complex subunit 1, mitochondrial (Complex III subunit 1) (Core protein I) (Ubiquinol-cytochrome-c reductase complex core protein 1)	0.68	58	HP0008972	Decreased mitochondrial respiratory chain activity
P30049	ATP5F1D ATP5D	513	ATP synthase subunit delta, mitochondrial (ATP synthase F1 subunit delta) (F-ATPase delta subunit)	0.68	59	HP0008972	Decreased mitochondrial respiratory chain activity
P03901	MT-ND4L MTND4L NADH4L ND4L	4539	NADH-ubiquinone oxidoreductase chain 4L (EC 7.1.1.2) (NADH dehydrogenase subunit 4L)	0.68	60	HP0008972	Decreased mitochondrial respiratory chain activity
Q86WW8	COA5 C2orf64	493753	Cytochrome c oxidase assembly factor 5	0.67	61	HP0008972	Decreased mitochondrial respiratory chain activity
Q9Y276	BCS1L BCS1	617	Mitochondrial chaperone BCS1 (h-BCS1) (BCS1-like protein)	0.67	62	HP0008972	Decreased mitochondrial respiratory chain activity
Q96GC5	MRPL48 CGI-118 HSPC290	51642	39S ribosomal protein L48, mitochondrial (L48mt) (MRP-L48) (Mitochondrial large ribosomal subunit protein mL48)	0.67	63	HP0008972	Decreased mitochondrial respiratory chain activity
P82909	MRPS36 KGD4 DC47	92259	28S ribosomal protein S36, mitochondrial (MRP-S36) (S36mt) (Alpha-ketoglutarate dehydrogenase component 4)	0.67	64	HP0008972	Decreased mitochondrial respiratory chain activity
Q8TCC3	MRPL30 MRPL28 RPML28 HSPC249	51263	39S ribosomal protein L30, mitochondrial (L30mt) (MRP-L30) (39S ribosomal protein L28, mitochondrial) (L28mt) (MRP-L28) (Mitochondrial large ribosomal subunit protein uL30m)	0.66	65	HP0008972	Decreased mitochondrial respiratory chain activity
Q8N5N7	MRPL50	54534	39S ribosomal protein L50, mitochondrial (L50mt) (MRP-L50) (Mitochondrial large ribosomal subunit protein mL50)	0.66	66	HP0008972	Decreased mitochondrial respiratory chain activity
Q9P0U1	TOMM7 TOM7 TOMM07 AD-014	54543	Mitochondrial import receptor subunit TOM7 homolog (Translocase of outer membrane 7 kDa subunit homolog)	0.66	67	HP0008972	Decreased mitochondrial respiratory chain activity
Q7L592	NDUFAF7 C2orf56 PRO1853	55471	Protein arginine methyltransferase NDUFAF7, mitochondrial (EC 2.1.1.320) (NADH dehydrogenase [ubiquinone] complex I, assembly factor 7) (Protein midA homolog)	0.66	68	HP0008972	Decreased mitochondrial respiratory chain activity
Q9BYC9	MRPL20	55052	39S ribosomal protein L20, mitochondrial (L20mt) (MRP-L20) (Mitochondrial large ribosomal subunit protein bL20m)	0.66	69	HP0008972	Decreased mitochondrial respiratory chain activity
O75947	ATP5PD ATP5H My032	10476	ATP synthase subunit d, mitochondrial (ATPase subunit d) (ATP synthase peripheral stalk subunit d)	0.66	70	HP0008972	Decreased mitochondrial respiratory chain activity
Q9NWT8	AURKAIP1 AIP AKIP MRPS38	54998	Aurora kinase A-interacting protein (AURKA-interacting protein) (28S ribosomal protein S38, mitochondrial) (MRP-S38) (Mitochondrial small ribosomal subunit protein mS38)	0.66	71	HP0008972	Decreased mitochondrial respiratory chain activity
Q5TGZ0	MICOS10 C1orf151 MIC10 MINOS1	440574	MICOS complex subunit MIC10 (Mitochondrial inner membrane organizing system protein 1)	0.65	72	HP0008972	Decreased mitochondrial respiratory chain activity
A6NFY7	SDHAF1 LYRM8	644096	Succinate dehydrogenase assembly factor 1, mitochondrial (SDH assembly factor 1) (SDHAF1) (LYR motif-containing protein 8)	0.65	73	HP0008972	Decreased mitochondrial respiratory chain activity
P56378	ATP5MJ ATP5MPL C14orf2 MP68 PRO1574	9556	ATP synthase subunit ATP5MJ, mitochondrial (6.8 kDa mitochondrial proteolipid protein) (MLQ) (ATP synthase membrane subunit 6.8PL)	0.65	74	HP0008972	Decreased mitochondrial respiratory chain activity
P08574	CYC1	1537	Cytochrome c1, heme protein, mitochondrial (EC 7.1.1.8) (Complex III subunit 4) (Complex III subunit IV) (Cytochrome b-c1 complex subunit 4) (Ubiquinol-cytochrome-c reductase complex cytochrome c1 subunit) (Cytochrome c-1)	0.64	75	HP0008972	Decreased mitochondrial respiratory chain activity
Q8TF08	COX7B2	170712	Cytochrome c oxidase subunit 7B2, mitochondrial (Cytochrome c oxidase polypeptide VIIb2)	0.64	76	HP0008972	Decreased mitochondrial respiratory chain activity
Q9HD33	MRPL47 NCM1 CGI-204	57129	39S ribosomal protein L47, mitochondrial (L47mt) (MRP-L47) (Mitochondrial large ribosomal subunit protein uL29m) (Nasopharyngeal carcinoma metastasis-related protein 1)	0.64	77	HP0008972	Decreased mitochondrial respiratory chain activity
Q9Y5J9	TIMM8B DDP2 DDPL TIM8B	26521	Mitochondrial import inner membrane translocase subunit Tim8 B (DDP-like protein) (Deafness dystonia protein 2)	0.64	78	HP0008972	Decreased mitochondrial respiratory chain activity
Q10713	PMPCA INPP5E KIAA0123 MPPA	23203	Mitochondrial-processing peptidase subunit alpha (Alpha-MPP) (Inactive zinc metalloprotease alpha) (P-55)	0.64	79	HP0008972	Decreased mitochondrial respiratory chain activity
P62072	TIMM10 TIM10	26519	Mitochondrial import inner membrane translocase subunit Tim10	0.63	80	HP0008972	Decreased mitochondrial respiratory chain activity
Q13084	MRPL28 MAAT1	10573	39S ribosomal protein L28, mitochondrial (L28mt) (MRP-L28) (Melanoma antigen p15) (Melanoma-associated antigen recognized by T-lymphocytes) (Mitochondrial large ribosomal subunit protein bL28m)	0.63	81	HP0008972	Decreased mitochondrial respiratory chain activity
P10176	COX8A COX8 COX8L	1351	Cytochrome c oxidase subunit 8A, mitochondrial (Cytochrome c oxidase polypeptide VIII-liver/heart) (Cytochrome c oxidase subunit 8-2)	0.63	82	HP0008972	Decreased mitochondrial respiratory chain activity
O60220	TIMM8A DDP DDP1 TIM8A	1678	Mitochondrial import inner membrane translocase subunit Tim8 A (Deafness dystonia protein 1) (X-linked deafness dystonia protein)	0.63	83	HP0008972	Decreased mitochondrial respiratory chain activity
P47985	UQCRFS1	7386	Cytochrome b-c1 complex subunit Rieske, mitochondrial (EC 7.1.1.8) (Complex III subunit 5) (Cytochrome b-c1 complex subunit 5) (Rieske iron-sulfur protein) (RISP) (Rieske protein UQCRFS1) (Ubiquinol-cytochrome c reductase iron-sulfur subunit) [Cleaved into: Cytochrome b-c1 complex subunit 9 (Su9) (Subunit 9) (8 kDa subunit 9) (Complex III subunit IX) (Cytochrome b-c1 complex subunit 11) (UQCRFS1 …	0.63	84	HP0008972	Decreased mitochondrial respiratory chain activity
Q7Z7F7	MRPL55 UNQ5835/PRO19675	128308	39S ribosomal protein L55, mitochondrial (L55mt) (MRP-L55) (Mitochondrial large ribosomal subunit protein bL31m) (Mitochondrial large ribosomal subunit protein mL55)	0.62	85	HP0008972	Decreased mitochondrial respiratory chain activity
P60602	ROMO1 C20orf52	140823	Reactive oxygen species modulator 1 (ROS modulator 1) (Epididymis tissue protein Li 175) (Glyrichin) (Mitochondrial targeting GxxxG motif protein) (MTGM) (Protein MGR2 homolog)	0.62	86	HP0008972	Decreased mitochondrial respiratory chain activity
Q8N4Q1	CHCHD4 MIA40	131474	Mitochondrial intermembrane space import and assembly protein 40 (Coiled-coil-helix-coiled-coil-helix domain-containing protein 4)	0.62	87	HP0008972	Decreased mitochondrial respiratory chain activity
Q96BP2	CHCHD1 C10orf34 MRPS37	118487	Coiled-coil-helix-coiled-coil-helix domain-containing protein 1 (28S ribosomal protein S37, mitochondrial) (MRP-S37) (Mitochondrial small ribosomal subunit protein mS37) (Nuclear protein C2360)	0.62	88	HP0008972	Decreased mitochondrial respiratory chain activity
Q9BQ48	MRPL34	64981	39S ribosomal protein L34, mitochondrial (L34mt) (MRP-L34) (Mitochondrial large ribosomal subunit protein bL34m)	0.61	89	HP0008972	Decreased mitochondrial respiratory chain activity
Q9Y291	MRPS33 CGI-139 PTD003	51650	28S ribosomal protein S33, mitochondrial (MRP-S33) (S33mt) (Mitochondrial small ribosomal subunit protein mS33)	0.61	90	HP0008972	Decreased mitochondrial respiratory chain activity
P82650	MRPS22 C3orf5 RPMS22 GK002	56945	28S ribosomal protein S22, mitochondrial (MRP-S22) (S22mt) (Mitochondrial small ribosomal subunit protein mS22)	0.61	91	HP0008972	Decreased mitochondrial respiratory chain activity
Q9NQ50	MRPL40 NLVCF URIM	64976	39S ribosomal protein L40, mitochondrial (L40mt) (MRP-L40) (Mitochondrial large ribosomal subunit protein mL40) (Nuclear localization signal-containing protein deleted in velocardiofacial syndrome) (Up-regulated in metastasis)	0.6	92	HP0008972	Decreased mitochondrial respiratory chain activity
O75127	PTCD1 KIAA0632	26024	Pentatricopeptide repeat-containing protein 1, mitochondrial	0.6	93	HP0008972	Decreased mitochondrial respiratory chain activity
Q49B96	COX19	90639	Cytochrome c oxidase assembly protein COX19 (hCOX19)	0.6	94	HP0008972	Decreased mitochondrial respiratory chain activity
Q7Z7H8	MRPL10 MRPL8 RPML8	124995	39S ribosomal protein L10, mitochondrial (L10mt) (MRP-L10) (39S ribosomal protein L8, mitochondrial) (L8mt) (MRP-L8) (Mitochondrial large ribosomal subunit protein uL10m)	0.59	95	HP0008972	Decreased mitochondrial respiratory chain activity
O75616	ERAL1 HERA	26284	GTPase Era, mitochondrial (H-ERA) (hERA) (Conserved ERA-like GTPase) (CEGA) (ERA-W) (ERA-like protein 1)	0.59	96	HP0008972	Decreased mitochondrial respiratory chain activity
O14561	NDUFAB1	4706	Acyl carrier protein, mitochondrial (ACP) (CI-SDAP) (NADH-ubiquinone oxidoreductase 9.6 kDa subunit)	0.59	97	HP0008972	Decreased mitochondrial respiratory chain activity
O75208	COQ9 C16orf49 HSPC326 PSEC0129	57017	Ubiquinone biosynthesis protein COQ9, mitochondrial	0.59	98	HP0008972	Decreased mitochondrial respiratory chain activity
P82930	MRPS34	65993	28S ribosomal protein S34, mitochondrial (MRP-S34) (S34mt) (Mitochondrial small ribosomal subunit protein mS34)	0.59	99	HP0008972	Decreased mitochondrial respiratory chain activity
Q9NZE8	MRPL35 BM-007	51318	39S ribosomal protein L35, mitochondrial (L35mt) (MRP-L35) (Mitochondrial large ribosomal subunit protein bL35m)	0.59	100	HP0008972	Decreased mitochondrial respiratory chain activity
Q9Y2Q9	MRPS28 MRPS35 HSPC007	28957	28S ribosomal protein S28, mitochondrial (MRP-S28) (S28mt) (28S ribosomal protein S35, mitochondrial) (MRP-S35) (S35mt) (Mitochondrial small ribosomal subunit protein bS1m)	0.59	101	HP0008972	Decreased mitochondrial respiratory chain activity
Q9BSJ5	C17orf80 HLC8 MIG3	55028	Uncharacterized protein C17orf80 (Cell migration-inducing gene 3 protein) (Human lung cancer oncogene 8 protein) (HLC-8)	0.58	102	HP0008972	Decreased mitochondrial respiratory chain activity
Q8N5M1	ATPAF2 ATP12 LP3663	91647	ATP synthase mitochondrial F1 complex assembly factor 2 (ATP12 homolog)	0.58	103	HP0008972	Decreased mitochondrial respiratory chain activity
Q9H061	TMEM126A	84233	Transmembrane protein 126A	0.58	104	HP0008972	Decreased mitochondrial respiratory chain activity
Q99766	DMAC2L ATP5S ATPW	27109	ATP synthase subunit s, mitochondrial (ATP synthase-coupling factor B) (FB) (Distal membrane arm assembly complex 2-like protein) (Mitochondrial ATP synthase regulatory component factor B)	0.57	105	HP0008972	Decreased mitochondrial respiratory chain activity
Q9Y6G3	MRPL42 MRPL31 MRPS32 RPML31 HSPC204 PTD007	28977	39S ribosomal protein L42, mitochondrial (L42mt) (MRP-L42) (39S ribosomal protein L31, mitochondrial) (L31mt) (MRP-L31) (Mitochondrial large ribosomal subunit protein mL42)	0.57	106	HP0008972	Decreased mitochondrial respiratory chain activity
Q9HBL8	NMRAL1 HSCARG	57407	NmrA-like family domain-containing protein 1	0.57	107	HP0008972	Decreased mitochondrial respiratory chain activity
Q7Z2W9	MRPL21	219927	39S ribosomal protein L21, mitochondrial (L21mt) (MRP-L21) (Mitochondrial large ribosomal subunit protein bL21m)	0.57	108	HP0008972	Decreased mitochondrial respiratory chain activity
Q6P1L8	MRPL14 MRPL32 RPML32	64928	39S ribosomal protein L14, mitochondrial (L14mt) (MRP-L14) (39S ribosomal protein L32, mitochondrial) (L32mt) (MRP-L32) (Mitochondrial large ribosomal subunit protein uL14m)	0.57	109	HP0008972	Decreased mitochondrial respiratory chain activity
Q9NS69	TOMM22 TOM22	56993	Mitochondrial import receptor subunit TOM22 homolog (hTom22) (1C9-2) (Translocase of outer membrane 22 kDa subunit homolog)	0.57	110	HP0008972	Decreased mitochondrial respiratory chain activity
Q9Y2R5	MRPS17 RPMS17 HSPC011	51373	28S ribosomal protein S17, mitochondrial (MRP-S17) (S17mt) (Mitochondrial small ribosomal subunit protein uS17m)	0.57	111	HP0008972	Decreased mitochondrial respiratory chain activity
Q96EL2	MRPS24 HSPC335	64951	28S ribosomal protein S24, mitochondrial (MRP-S24) (S24mt) (Mitochondrial small ribosomal subunit protein uS3m) (bMRP-47) (bMRP47)	0.57	112	HP0008972	Decreased mitochondrial respiratory chain activity
Q9UGC7	MTRF1L MTRF1A	54516	Peptide chain release factor 1-like, mitochondrial (Mitochondrial translational release factor 1-like) (mtRF1a)	0.56	113	HP0008972	Decreased mitochondrial respiratory chain activity
Q9BVV7	TIMM21 C18orf55 TIM21 HSPC154	29090	Mitochondrial import inner membrane translocase subunit Tim21 (TIM21-like protein, mitochondrial)	0.56	114	HP0008972	Decreased mitochondrial respiratory chain activity
Q9Y6N1	COX11	1353	Cytochrome c oxidase assembly protein COX11, mitochondrial	0.56	115	HP0008972	Decreased mitochondrial respiratory chain activity
P00846	MT-ATP6 ATP6 ATPASE6 MTATP6	4508	ATP synthase subunit a (F-ATPase protein 6)	0.56	116	HP0008972	Decreased mitochondrial respiratory chain activity
Q9NVS2	MRPS18A	55168	39S ribosomal protein S18a, mitochondrial (MRP-S18-a) (Mrps18a) (S18mt-a) (39S ribosomal protein S18-3, mitochondrial) (MRP-S18-3) (Mitochondrial large ribosomal subunit protein bS18a) (Mitochondrial large ribosomal subunit protein mL66)	0.55	117	HP0008972	Decreased mitochondrial respiratory chain activity
Q6P161	MRPL54	116541	39S ribosomal protein L54, mitochondrial (L54mt) (MRP-L54) (Mitochondrial large ribosomal subunit protein mL54)	0.55	118	HP0008972	Decreased mitochondrial respiratory chain activity
P00414	MT-CO3 COIII COXIII MTCO3	4514	Cytochrome c oxidase subunit 3 (EC 7.1.1.9) (Cytochrome c oxidase polypeptide III)	0.55	119	HP0008972	Decreased mitochondrial respiratory chain activity
Q9UII2	ATP5IF1 ATPI ATPIF1	93974	ATPase inhibitor, mitochondrial (ATP synthase F1 subunit epsilon) (Inhibitor of F(1)F(o)-ATPase) (IF(1)) (IF1)	0.55	120	HP0008972	Decreased mitochondrial respiratory chain activity
P18859	ATP5PF ATP5A ATP5J ATPM	522	ATP synthase-coupling factor 6, mitochondrial (ATPase subunit F6) (ATP synthase peripheral stalk subunit F6)	0.55	121	HP0008972	Decreased mitochondrial respiratory chain activity
Q96EL3	MRPL53	116540	39S ribosomal protein L53, mitochondrial (L53mt) (MRP-L53) (Mitochondrial large ribosomal subunit protein mL53)	0.54	122	HP0008972	Decreased mitochondrial respiratory chain activity
Q92665	MRPS31 IMOGN38	10240	28S ribosomal protein S31, mitochondrial (MRP-S31) (S31mt) (Imogen 38) (Mitochondrial small ribosomal subunit protein mS31)	0.54	123	HP0008972	Decreased mitochondrial respiratory chain activity
Q8N4H5	TOMM5 C9orf105 TOM5	401505	Mitochondrial import receptor subunit TOM5 homolog	0.54	124	HP0008972	Decreased mitochondrial respiratory chain activity
P36542	ATP5F1C ATP5C ATP5C1 ATP5CL1	509	ATP synthase subunit gamma, mitochondrial (ATP synthase F1 subunit gamma) (F-ATPase gamma subunit)	0.54	125	HP0008972	Decreased mitochondrial respiratory chain activity
Q9Y6H1	CHCHD2 C7orf17 AAG10	51142	Coiled-coil-helix-coiled-coil-helix domain-containing protein 2 (Aging-associated gene 10 protein) (HCV NS2 trans-regulated protein) (NS2TP)	0.54	126	HP0008972	Decreased mitochondrial respiratory chain activity
Q14197	MRPL58 DS1 ICT1	3396	Peptidyl-tRNA hydrolase ICT1, mitochondrial (EC 3.1.1.29) (39S ribosomal protein L58, mitochondrial) (MRP-L58) (Digestion substraction 1) (DS-1) (Immature colon carcinoma transcript 1 protein) (Mitochondrial large ribosomal subunit protein mL62)	0.54	127	HP0008972	Decreased mitochondrial respiratory chain activity
Q4U2R6	MRPL51 MRP64 CDA09 HSPC241	51258	39S ribosomal protein L51, mitochondrial (L51mt) (MRP-L51) (Mitochondrial large ribosomal subunit protein mL51) (bMRP-64) (bMRP64)	0.53	128	HP0008972	Decreased mitochondrial respiratory chain activity
Q86TS9	MRPL52	122704	39S ribosomal protein L52, mitochondrial (L52mt) (MRP-L52) (Mitochondrial large ribosomal subunit protein mL52)	0.53	129	HP0008972	Decreased mitochondrial respiratory chain activity
Q9BRJ2	MRPL45	84311	39S ribosomal protein L45, mitochondrial (L45mt) (MRP-L45) (Mitochondrial large ribosomal subunit protein mL45)	0.53	130	HP0008972	Decreased mitochondrial respiratory chain activity
P22695	UQCRC2	7385	Cytochrome b-c1 complex subunit 2, mitochondrial (Complex III subunit 2) (Core protein II) (Ubiquinol-cytochrome-c reductase complex core protein 2)	0.53	131	HP0008972	Decreased mitochondrial respiratory chain activity
Q9Y241	HIGD1A HIG1 HSPC010	25994	HIG1 domain family member 1A, mitochondrial (Hypoxia-inducible gene 1 protein) (RCF1 homolog A) (RCF1a)	0.53	132	HP0008972	Decreased mitochondrial respiratory chain activity
Q99595	TIMM17A MIMT17 TIM17 TIM17A TIMM17	10440	Mitochondrial import inner membrane translocase subunit Tim17-A (Inner membrane preprotein translocase Tim17a)	0.52	133	HP0008972	Decreased mitochondrial respiratory chain activity
Q9Y5J7	TIMM9 TIM9 TIM9A TIMM9A	26520	Mitochondrial import inner membrane translocase subunit Tim9	0.52	134	HP0008972	Decreased mitochondrial respiratory chain activity
Q9H0U6	MRPL18 HSPC071	29074	39S ribosomal protein L18, mitochondrial (L18mt) (MRP-L18) (Mitochondrial large ribosomal subunit protein uL18m)	0.52	135	HP0008972	Decreased mitochondrial respiratory chain activity
Q96DV4	MRPL38 HSPC262	64978	39S ribosomal protein L38, mitochondrial (L38mt) (MRP-L38) (Mitochondrial large ribosomal subunit protein mL38)	0.52	136	HP0008972	Decreased mitochondrial respiratory chain activity
Q9H2K0	MTIF3 DC38	219402	Translation initiation factor IF-3, mitochondrial (IF-3(Mt)) (IF-3Mt) (IF3(mt)) (IF3mt)	0.51	137	HP0008972	Decreased mitochondrial respiratory chain activity
O14925	TIMM23 TIM23	100287932	Mitochondrial import inner membrane translocase subunit Tim23	0.51	138	HP0008972	Decreased mitochondrial respiratory chain activity
Q9Y3D5	MRPS18C CGI-134	51023	28S ribosomal protein S18c, mitochondrial (MRP-S18-c) (Mrps18-c) (S18mt-c) (28S ribosomal protein S18-1, mitochondrial) (MRP-S18-1) (Mitochondrial small ribosomal subunit protein bS18c) (Mitochondrial small ribosomal subunit protein bS18m)	0.51	139	HP0008972	Decreased mitochondrial respiratory chain activity
P82921	MRPS21 RPMS21 MDS016	54460	28S ribosomal protein S21, mitochondrial (MRP-S21) (S21mt) (Mitochondrial small ribosomal subunit protein bS21m)	0.51	140	HP0008972	Decreased mitochondrial respiratory chain activity
Q9NP92	MRPS30 PDCD9 BM-047	10884	39S ribosomal protein S30, mitochondrial (MRP-S30) (S30mt) (Mitochondrial large ribosomal subunit protein mL65) (Mitochondrial large ribosomal subunit protein mS30) (Programmed cell death protein 9)	0.51	141	HP0008972	Decreased mitochondrial respiratory chain activity
O75394	MRPL33 C2orf1	9553	39S ribosomal protein L33, mitochondrial (L33mt) (MRP-L33) (Mitochondrial large ribosomal subunit protein bL33m)	0.51	142	HP0008972	Decreased mitochondrial respiratory chain activity
P82673	MRPS35 MRPS28 HDCMD11P MDS023 PSEC0213	60488	28S ribosomal protein S35, mitochondrial (MRP-S35) (S35mt) (28S ribosomal protein S28, mitochondrial) (MRP-S28) (S28mt) (Mitochondrial small ribosomal subunit protein mS35)	0.5	143	HP0008972	Decreased mitochondrial respiratory chain activity
Q9BYN8	MRPS26 C20orf193 RPMS13	64949	28S ribosomal protein S26, mitochondrial (MRP-S26) (S26mt) (28S ribosomal protein S13, mitochondrial) (MRP-S13) (S13mt) (Mitochondrial small ribosomal subunit protein mS26)	0.5	144	HP0008972	Decreased mitochondrial respiratory chain activity
Q9Y676	MRPS18B C6orf14 HSPC183 PTD017	28973	28S ribosomal protein S18b, mitochondrial (MRP-S18-b) (Mrps18-b) (S18mt-b) (28S ribosomal protein S18-2, mitochondrial) (MRP-S18-2) (Mitochondrial small ribosomal subunit protein bS18b) (Mitochondrial small ribosomal subunit protein mS40)	0.5	145	HP0008972	Decreased mitochondrial respiratory chain activity
Q8IXM3	MRPL41 BMRP MRPL27 RPML27 PIG3	64975	39S ribosomal protein L41, mitochondrial (L41mt) (MRP-L41) (39S ribosomal protein L27 homolog) (Bcl-2-interacting mitochondrial ribosomal protein L41) (Cell proliferation-inducing gene 3 protein) (MRP-L27 homolog) (Mitochondrial large ribosomal subunit protein mL41)	0.5	146	HP0008972	Decreased mitochondrial respiratory chain activity
Q9Y5J6	TIMM10B FXC1 TIM9B TIMM9B	26515	Mitochondrial import inner membrane translocase subunit Tim10 B (Fracture callus protein 1) (FxC1) (Mitochondrial import inner membrane translocase subunit Tim9 B) (TIMM10B) (Tim10b)	0.5	147	HP0008972	Decreased mitochondrial respiratory chain activity
Q13405	MRPL49 C11orf4 NOF1 OK/SW-cl.67	740	39S ribosomal protein L49, mitochondrial (L49mt) (MRP-L49) (Mitochondrial large ribosomal subunit protein mL49) (Neighbor of FAU) (NOF) (Protein NOF1)	0.49	148	HP0008972	Decreased mitochondrial respiratory chain activity
Q9H9J2	MRPL44	65080	39S ribosomal protein L44, mitochondrial (L44mt) (MRP-L44) (EC 3.1.26.-) (Mitochondrial large ribosomal subunit protein mL44)	0.49	149	HP0008972	Decreased mitochondrial respiratory chain activity
Q9H2W6	MRPL46 C15orf4 LIECG2	26589	39S ribosomal protein L46, mitochondrial (L46mt) (MRP-L46) (Mitochondrial large ribosomal subunit protein mL46) (P2ECSL)	0.49	150	HP0008972	Decreased mitochondrial respiratory chain activity
