# Supplementary material for: Integration of Human Protein Sequence and Protein-Protein Interaction Data by Graph Autoencoder to Identify Novel Protein-Abnormal Phenotype Associations
Source: Cells. 2022 Aug 10;11(16):2485. doi: 10.3390/cells11162485 (PMC9406402; doi:10.3390/cells11162485)
Supplement: Supplementary file 1 [file cells-11-02485-s001.zip › Supplementary Table S5.xlsx]

## Sheet: Table S5
Supplementary Table S5. TOP80 prioritized HP:0003146 (Hypocholesterolemia) associated genes.
Uniprot ID	Gene Symbol	Entrez Gene ID	Protein name	Score	Rank	HPO Term ID	HPO Term name
Q16850	CYP51A1 CYP51	1595	Lanosterol 14-alpha demethylase (LDM) (EC 1.14.14.154) (CYPLI) (Cytochrome P450 51A1) (Cytochrome P450-14DM) (Cytochrome P45014DM) (Cytochrome P450LI) (Sterol 14-alpha demethylase)	0.361652	1	HP:0003146	Hypocholesterolemia
Q9Y6A2	CYP46A1 CYP46	10858	Cholesterol 24-hydroxylase (CH24H) (EC 1.14.14.25) (Cholesterol 24-monooxygenase) (Cholesterol 24S-hydroxylase) (Cytochrome P450 46A1)	0.315023	2	HP:0003146	Hypocholesterolemia
Q14534	SQLE ERG1	6713	Squalene monooxygenase (EC 1.14.14.17) (Squalene epoxidase) (SE)	0.291434	3	HP:0003146	Hypocholesterolemia
O60683	PEX10 RNF69	5192	Peroxisome biogenesis factor 10 (Peroxin-10) (Peroxisomal biogenesis factor 10) (Peroxisome assembly protein 10) (RING finger protein 69)	0.290761	4	HP:0003146	Hypocholesterolemia
P37268	FDFT1	2222	Squalene synthase (SQS) (SS) (EC 2.5.1.21) (FPP:FPP farnesyltransferase) (Farnesyl-diphosphate farnesyltransferase) (Farnesyl-diphosphate farnesyltransferase 1)	0.276038	5	HP:0003146	Hypocholesterolemia
Q02318	CYP27A1 CYP27	1593	Sterol 26-hydroxylase, mitochondrial (EC 1.14.15.15) (5-beta-cholestane-3-alpha,7-alpha,12-alpha-triol 26-hydroxylase) (Cytochrome P-450C27/25) (Cytochrome P450 27) (Sterol 27-hydroxylase) (Vitamin D(3) 25-hydroxylase)	0.239464	6	HP:0003146	Hypocholesterolemia
Q2T9J0	TYSND1	219743	Peroxisomal leader peptide-processing protease (EC 3.4.21.-) (Trypsin domain-containing protein 1) [Cleaved into: Peroxisomal leader peptide-processing protease, 15 kDa form; Peroxisomal leader peptide-processing protease, 45 kDa form]	0.231888	7	HP:0003146	Hypocholesterolemia
O75845	SC5D SC5DL	6309	Lathosterol oxidase (EC 1.14.19.20) (C-5 sterol desaturase) (Delta(7)-sterol 5-desaturase) (Delta(7)-sterol C5(6)-desaturase) (Lathosterol 5-desaturase) (Sterol-C5-desaturase)	0.215743	8	HP:0003146	Hypocholesterolemia
Q92968	PEX13	5194	Peroxisomal membrane protein PEX13 (Peroxin-13)	0.213833	9	HP:0003146	Hypocholesterolemia
P22307	SCP2	6342	Sterol carrier protein 2 (SCP-2) (Acetyl-CoA C-myristoyltransferase) (EC 2.3.1.155) (Non-specific lipid-transfer protein) (NSL-TP) (Propanoyl-CoA C-acyltransferase) (EC 2.3.1.176) (SCP-2/3-oxoacyl-CoA thiolase) (SCP-2/thiolase) (EC 2.3.1.16) (SCP-chi) (SCPX) (Sterol carrier protein X) (SCP-X) (Straight-chain acyl-CoA oxidase) (SCOX)	0.213818	10	HP:0003146	Hypocholesterolemia
Q14032	BAAT	570	Bile acid-CoA:amino acid N-acyltransferase (BACAT) (BAT) (EC 2.3.1.65) (Bile acid-CoA thioesterase) (Choloyl-CoA hydrolase) (EC 3.1.2.27) (Glycine N-choloyltransferase) (Long-chain fatty-acyl-CoA hydrolase) (EC 3.1.2.2)	0.213611	11	HP:0003146	Hypocholesterolemia
P48449	LSS OSC	4047	Lanosterol synthase (EC 5.4.99.7) (2,3-epoxysqualene--lanosterol cyclase) (Oxidosqualene--lanosterol cyclase) (OSC) (hOSC)	0.212284	12	HP:0003146	Hypocholesterolemia
O75881	CYP7B1	9420	Cytochrome P450 7B1 (24-hydroxycholesterol 7-alpha-hydroxylase) (EC 1.14.14.26) (25/26-hydroxycholesterol 7-alpha-hydroxylase) (EC 1.14.14.29) (3-hydroxysteroid 7-alpha hydroxylase) (Oxysterol 7-alpha-hydroxylase)	0.211489	13	HP:0003146	Hypocholesterolemia
Q9UNU6	CYP8B1 CYP12	1582	7-alpha-hydroxycholest-4-en-3-one 12-alpha-hydroxylase (EC 1.14.14.139) (7-alpha-hydroxy-4-cholesten-3-one 12-alpha-hydroxylase) (CYPVIIIB1) (Cytochrome P450 8B1) (Sterol 12-alpha-hydroxylase)	0.20503	14	HP:0003146	Hypocholesterolemia
P22680	CYP7A1 CYP7	1581	Cytochrome P450 7A1 (24-hydroxycholesterol 7-alpha-hydroxylase) (EC 1.14.14.26) (CYPVII) (Cholesterol 7-alpha-hydroxylase) (Cholesterol 7-alpha-monooxygenase) (EC 1.14.14.23)	0.201906	15	HP:0003146	Hypocholesterolemia
P04035	HMGCR	3156	3-hydroxy-3-methylglutaryl-coenzyme A reductase (HMG-CoA reductase) (EC 1.1.1.34)	0.196829	16	HP:0003146	Hypocholesterolemia
P28328	PEX2 PAF1 PMP3 PMP35 PXMP3 RNF72	5828	Peroxisome biogenesis factor 2 (35 kDa peroxisomal membrane protein) (Peroxin-2) (Peroxisomal membrane protein 3) (Peroxisome assembly factor 1) (PAF-1) (RING finger protein 72)	0.195312	17	HP:0003146	Hypocholesterolemia
P20813	CYP2B6	1555	Cytochrome P450 2B6 (EC 1.14.13.-) (1,4-cineole 2-exo-monooxygenase) (CYPIIB6) (Cytochrome P450 IIB1)	0.194683	18	HP:0003146	Hypocholesterolemia
P56937	HSD17B7 17HSD7 SDR37C1 UNQ2563/PRO6243	51478	3-keto-steroid reductase/17-beta-hydroxysteroid dehydrogenase 7 (17-beta-hydroxysteroid dehydrogenase 7) (17-beta-HSD 7) (3-keto-steroid reductase) (EC 1.1.1.270) (Dihydrotestosterone oxidoreductase) (EC 1.1.1.210) (Estradiol 17-beta-dehydrogenase 7) (EC 1.1.1.62) (Short chain dehydrogenase/reductase family 37C member 1)	0.194257	19	HP:0003146	Hypocholesterolemia
P40855	PEX19 HK33 PXF OK/SW-cl.22	5824	Peroxisomal biogenesis factor 19 (33 kDa housekeeping protein) (Peroxin-19) (Peroxisomal farnesylated protein)	0.189762	20	HP:0003146	Hypocholesterolemia
P51659	HSD17B4 EDH17B4 SDR8C1	3295	Peroxisomal multifunctional enzyme type 2 (MFE-2) (17-beta-hydroxysteroid dehydrogenase 4) (17-beta-HSD 4) (D-bifunctional protein) (DBP) (Multifunctional protein 2) (MFP-2) (Short chain dehydrogenase/reductase family 8C member 1) [Cleaved into: (3R)-hydroxyacyl-CoA dehydrogenase (EC 1.1.1.n12); Enoyl-CoA hydratase 2 (EC 4.2.1.107) (EC 4.2.1.119) (3-alpha,7-alpha,12-alpha-trihydroxy-5-beta-choles…	0.185727	21	HP:0003146	Hypocholesterolemia
P50542	PEX5 PXR1	5830	Peroxisomal targeting signal 1 receptor (PTS1 receptor) (PTS1R) (PTS1-BP) (Peroxin-5) (Peroxisomal C-terminal targeting signal import receptor) (Peroxisome receptor 1)	0.183511	22	HP:0003146	Hypocholesterolemia
Q53GQ0	HSD17B12 SDR12C1	51144	Very-long-chain 3-oxoacyl-CoA reductase (EC 1.1.1.330) (17-beta-hydroxysteroid dehydrogenase 12) (17-beta-HSD 12) (3-ketoacyl-CoA reductase) (KAR) (Estradiol 17-beta-dehydrogenase 12) (EC 1.1.1.62) (Short chain dehydrogenase/reductase family 12C member 1)	0.182313	23	HP:0003146	Hypocholesterolemia
Q9NYL5	CYP39A1	51302	24-hydroxycholesterol 7-alpha-hydroxylase (EC 1.14.14.26) (Cytochrome P450 39A1) (hCYP39A1) (Oxysterol 7-alpha-hydroxylase)	0.182046	24	HP:0003146	Hypocholesterolemia
O75381	PEX14	5195	Peroxisomal membrane protein PEX14 (PTS1 receptor-docking protein) (Peroxin-14) (Peroxisomal membrane anchor protein PEX14)	0.180633	25	HP:0003146	Hypocholesterolemia
P56589	PEX3	8504	Peroxisomal biogenesis factor 3 (Peroxin-3) (Peroxisomal assembly protein PEX3)	0.177552	26	HP:0003146	Hypocholesterolemia
Q02928	CYP4A11 CYP4A2	1579	Cytochrome P450 4A11 (EC 1.14.14.1) (20-hydroxyeicosatetraenoic acid synthase) (20-HETE synthase) (CYP4AII) (CYPIVA11) (Cytochrome P-450HK-omega) (Cytochrome P450HL-omega) (Fatty acid omega-hydroxylase) (Lauric acid omega-hydroxylase) (Long-chain fatty acid omega-monooxygenase) (EC 1.14.14.80)	0.166721	27	HP:0003146	Hypocholesterolemia
O95864	FADS2	9415	Acyl-CoA 6-desaturase (EC 1.14.19.3) (Delta(6) fatty acid desaturase) (D6D) (Delta(6) desaturase) (Delta-6 desaturase) (Fatty acid desaturase 2)	0.159644	28	HP:0003146	Hypocholesterolemia
O43933	PEX1	5189	Peroxisome biogenesis factor 1 (Peroxin-1) (Peroxisome biogenesis disorder protein 1)	0.156728	29	HP:0003146	Hypocholesterolemia
Q9UBJ2	ABCD2 ALD1 ALDL1 ALDR ALDRP	225	ATP-binding cassette sub-family D member 2 (Adrenoleukodystrophy-like 1) (Adrenoleukodystrophy-related protein) (hALDR)	0.154536	30	HP:0003146	Hypocholesterolemia
Q96D70	R3HDM4 C19orf22	91300	R3H domain-containing protein 4	0.153335	31	HP:0003146	Hypocholesterolemia
Q6ZNB7	AGMO TMEM195	392636	Alkylglycerol monooxygenase (EC 1.14.16.5) (Transmembrane protein 195)	0.153225	32	HP:0003146	Hypocholesterolemia
P28288	ABCD3 PMP70 PXMP1	5825	ATP-binding cassette sub-family D member 3 (70 kDa peroxisomal membrane protein) (PMP70)	0.15305	33	HP:0003146	Hypocholesterolemia
P05181	CYP2E1 CYP2E	1571	Cytochrome P450 2E1 (EC 1.14.14.1) (4-nitrophenol 2-hydroxylase) (EC 1.14.13.n7) (CYPIIE1) (Cytochrome P450-J)	0.151364	34	HP:0003146	Hypocholesterolemia
Q99424	ACOX2	8309	Peroxisomal acyl-coenzyme A oxidase 2 (EC 1.17.99.3) (3-alpha,7-alpha,12-alpha-trihydroxy-5-beta-cholestanoyl-CoA 24-hydroxylase) (3-alpha,7-alpha,12-alpha-trihydroxy-5-beta-cholestanoyl-CoA oxidase) (Trihydroxycoprostanoyl-CoA oxidase) (THCA-CoA oxidase) (THCCox)	0.150407	35	HP:0003146	Hypocholesterolemia
P33897	ABCD1 ALD	215	ATP-binding cassette sub-family D member 1 (EC 7.6.2.4) (Adrenoleukodystrophy protein) (ALDP)	0.148869	36	HP:0003146	Hypocholesterolemia
O15228	GNPAT DAPAT DHAPAT	8443	Dihydroxyacetone phosphate acyltransferase (DAP-AT) (DHAP-AT) (EC 2.3.1.42) (Acyl-CoA:dihydroxyacetonephosphateacyltransferase) (Glycerone-phosphate O-acyltransferase)	0.148455	37	HP:0003146	Hypocholesterolemia
Q9Y5Y5	PEX16	9409	Peroxisomal membrane protein PEX16 (Peroxin-16) (Peroxisomal biogenesis factor 16)	0.147143	38	HP:0003146	Hypocholesterolemia
P00167	CYB5A CYB5	1528	Cytochrome b5 (Microsomal cytochrome b5 type A) (MCB5)	0.139981	39	HP:0003146	Hypocholesterolemia
Q15067	ACOX1 ACOX	51	Peroxisomal acyl-coenzyme A oxidase 1 (AOX) (EC 1.3.3.6) (Palmitoyl-CoA oxidase) (Straight-chain acyl-CoA oxidase) (SCOX) [Cleaved into: Peroxisomal acyl-CoA oxidase 1, A chain; Peroxisomal acyl-CoA oxidase 1, B chain; Peroxisomal acyl-CoA oxidase 1, C chain]	0.134832	40	HP:0003146	Hypocholesterolemia
Q15738	NSDHL H105E3	50814	Sterol-4-alpha-carboxylate 3-dehydrogenase, decarboxylating (EC 1.1.1.170) (Protein H105e3)	0.13378	41	HP:0003146	Hypocholesterolemia
P10632	CYP2C8	1558	Cytochrome P450 2C8 (EC 1.14.14.1) (CYPIIC8) (Cytochrome P450 IIC2) (Cytochrome P450 MP-12) (Cytochrome P450 MP-20) (Cytochrome P450 form 1) (S-mephenytoin 4-hydroxylase)	0.133596	42	HP:0003146	Hypocholesterolemia
O76062	TM7SF2 ANG1	7108	Delta(14)-sterol reductase TM7SF2 (Delta-14-SR) (EC 1.3.1.70) (3-beta-hydroxysterol Delta (14)-reductase) (Another new gene 1 protein) (C-14 sterol reductase) (C14SR) (Putative sterol reductase SR-1) (Sterol C14-reductase) (Transmembrane 7 superfamily member 2)	0.131795	43	HP:0003146	Hypocholesterolemia
Q12772	SREBF2 BHLHD2 SREBP2	6721	Sterol regulatory element-binding protein 2 (SREBP-2) (Class D basic helix-loop-helix protein 2) (bHLHd2) (Sterol regulatory element-binding transcription factor 2) [Cleaved into: Processed sterol regulatory element-binding protein 2 (Transcription factor SREBF2)]	0.130037	44	HP:0003146	Hypocholesterolemia
Q9NUI1	DECR2 PDCR SDR17C1	26063	Peroxisomal 2,4-dienoyl-CoA reductase [(3E)-enoyl-CoA-producing] (pDCR) (EC 1.3.1.124) (2,4-dienoyl-CoA reductase 2) (Short chain dehydrogenase/reductase family 17C member 1)	0.129065	45	HP:0003146	Hypocholesterolemia
O75192	PEX11A PEX11	8800	Peroxisomal membrane protein 11A (HsPEX11p) (28 kDa peroxisomal integral membrane protein) (PMP28) (Peroxin-11A) (Peroxisomal biogenesis factor 11A) (Protein PEX11 homolog alpha) (PEX11-alpha)	0.128441	46	HP:0003146	Hypocholesterolemia
P34913	EPHX2	2053	Bifunctional epoxide hydrolase 2 [Includes: Cytosolic epoxide hydrolase 2 (CEH) (EC 3.3.2.10) (Epoxide hydratase) (Soluble epoxide hydrolase) (SEH); Lipid-phosphate phosphatase (EC 3.1.3.76)]	0.127898	47	HP:0003146	Hypocholesterolemia
Q9NPZ5	B3GAT2 GLCATS KIAA1963	135152	Galactosylgalactosylxylosylprotein 3-beta-glucuronosyltransferase 2 (EC 2.4.1.135) (Beta-1,3-glucuronyltransferase 2) (GlcAT-D) (UDP-glucuronosyltransferase S) (GlcAT-S) (Glucuronosyltransferase S)	0.127618	48	HP:0003146	Hypocholesterolemia
Q15392	DHCR24 KIAA0018	1718	Delta(24)-sterol reductase (EC 1.3.1.72) (24-dehydrocholesterol reductase) (3-beta-hydroxysterol Delta-24-reductase) (Diminuto/dwarf1 homolog) (Seladin-1)	0.125383	49	HP:0003146	Hypocholesterolemia
P78381	SLC35A2 UGALT UGT UGTL	7355	UDP-galactose translocator (Solute carrier family 35 member A2) (UDP-galactose transporter) (UDP-Gal-Tr) (UGT)	0.124852	50	HP:0003146	Hypocholesterolemia
O15254	ACOX3 BRCOX PRCOX	8310	Peroxisomal acyl-coenzyme A oxidase 3 (EC 1.3.3.6) (Branched-chain acyl-CoA oxidase) (BRCACox) (Pristanoyl-CoA oxidase)	0.122476	51	HP:0003146	Hypocholesterolemia
P04798	CYP1A1	1543	Cytochrome P450 1A1 (CYPIA1) (EC 1.14.14.1) (Cytochrome P450 form 6) (Cytochrome P450-C) (Cytochrome P450-P1) (Hydroperoxy icosatetraenoate dehydratase) (EC 4.2.1.152)	0.122108	52	HP:0003146	Hypocholesterolemia
P08684	CYP3A4 CYP3A3	1576	Cytochrome P450 3A4 (EC 1.14.14.1) (1,4-cineole 2-exo-monooxygenase) (1,8-cineole 2-exo-monooxygenase) (EC 1.14.14.56) (Albendazole monooxygenase (sulfoxide-forming)) (EC 1.14.14.73) (Albendazole sulfoxidase) (CYPIIIA3) (CYPIIIA4) (Cholesterol 25-hydroxylase) (Cytochrome P450 3A3) (Cytochrome P450 HLp) (Cytochrome P450 NF-25) (Cytochrome P450-PCN1) (Nifedipine oxidase) (Quinine 3-monooxygenase) (…	0.12123	53	HP:0003146	Hypocholesterolemia
P05177	CYP1A2	1544	Cytochrome P450 1A2 (EC 1.14.14.1) (CYPIA2) (Cholesterol 25-hydroxylase) (Cytochrome P(3)450) (Cytochrome P450 4) (Cytochrome P450-P3) (Hydroperoxy icosatetraenoate dehydratase) (EC 4.2.1.152)	0.119876	54	HP:0003146	Hypocholesterolemia
Q13608	PEX6 PXAAA1	5190	Peroxisome assembly factor 2 (PAF-2) (Peroxin-6) (Peroxisomal biogenesis factor 6) (Peroxisomal-type ATPase 1)	0.119009	55	HP:0003146	Hypocholesterolemia
O60701	UGDH	7358	UDP-glucose 6-dehydrogenase (UDP-Glc dehydrogenase) (UDP-GlcDH) (UDPGDH) (EC 1.1.1.22)	0.117835	56	HP:0003146	Hypocholesterolemia
O14734	ACOT8 ACTEIII PTE1	10005	Acyl-coenzyme A thioesterase 8 (Acyl-CoA thioesterase 8) (EC 3.1.2.1) (EC 3.1.2.11) (EC 3.1.2.2) (EC 3.1.2.3) (EC 3.1.2.5) (Choloyl-coenzyme A thioesterase) (EC 3.1.2.27) (HIV-Nef-associated acyl-CoA thioesterase) (Peroxisomal acyl-CoA thioesterase 2) (PTE-2) (Peroxisomal acyl-coenzyme A thioester hydrolase 1) (PTE-1) (Peroxisomal long-chain acyl-CoA thioesterase 1) (Thioesterase II) (hACTE-III) …	0.117321	57	HP:0003146	Hypocholesterolemia
Q9NYQ3	HAO2 HAOX2 GIG16	51179	Hydroxyacid oxidase 2 (HAOX2) (EC 1.1.3.15) ((S)-2-hydroxy-acid oxidase, peroxisomal) (Cell growth-inhibiting gene 16 protein) (Long chain alpha-hydroxy acid oxidase) (Long-chain L-2-hydroxy acid oxidase)	0.117093	58	HP:0003146	Hypocholesterolemia
Q13907	IDI1	3422	Isopentenyl-diphosphate Delta-isomerase 1 (EC 5.3.3.2) (Isopentenyl pyrophosphate isomerase 1) (IPP isomerase 1) (IPPI1)	0.116635	59	HP:0003146	Hypocholesterolemia
O75908	SOAT2 ACACT2 ACAT2	8435	Sterol O-acyltransferase 2 (EC 2.3.1.26) (Acyl-coenzyme A:cholesterol acyltransferase 2) (ACAT-2) (Cholesterol acyltransferase 2)	0.115952	60	HP:0003146	Hypocholesterolemia
O00767	SCD FADS5 SCD1 SCDOS	6319	Stearoyl-CoA desaturase (hSCD1) (EC 1.14.19.1) (Acyl-CoA desaturase) (Delta(9)-desaturase) (Delta-9 desaturase) (Fatty acid desaturase)	0.115316	61	HP:0003146	Hypocholesterolemia
O43808	SLC25A17 PMP34	10478	Peroxisomal membrane protein PMP34 (34 kDa peroxisomal membrane protein) (Solute carrier family 25 member 17)	0.114871	62	HP:0003146	Hypocholesterolemia
Q9UKG9	CROT COT	54677	Peroxisomal carnitine O-octanoyltransferase (COT) (EC 2.3.1.137)	0.113936	63	HP:0003146	Hypocholesterolemia
P35610	SOAT1 ACACT ACACT1 ACAT ACAT1 SOAT STAT	6646	Sterol O-acyltransferase 1 (EC 2.3.1.26) (Acyl-coenzyme A:cholesterol acyltransferase 1) (ACAT-1) (Cholesterol acyltransferase 1)	0.111624	64	HP:0003146	Hypocholesterolemia
Q9NYP7	ELOVL5 ELOVL2 PRO0530	60481	Elongation of very long chain fatty acids protein 5 (EC 2.3.1.199) (3-keto acyl-CoA synthase ELOVL5) (ELOVL fatty acid elongase 5) (ELOVL FA elongase 5) (Fatty acid elongase 1) (hELO1) (Very long chain 3-ketoacyl-CoA synthase 5) (Very long chain 3-oxoacyl-CoA synthase 5)	0.1116	65	HP:0003146	Hypocholesterolemia
O14735	CDIPT PIS PIS1	10423	CDP-diacylglycerol--inositol 3-phosphatidyltransferase (EC 2.7.8.11) (Phosphatidylinositol synthase) (PI synthase) (PtdIns synthase)	0.111243	66	HP:0003146	Hypocholesterolemia
P11712	CYP2C9 CYP2C10	1559	Cytochrome P450 2C9 (EC 1.14.14.1) ((R)-limonene 6-monooxygenase) (EC 1.14.14.53) ((S)-limonene 6-monooxygenase) (EC 1.14.14.51) ((S)-limonene 7-monooxygenase) (EC 1.14.14.52) (CYPIIC9) (Cholesterol 25-hydroxylase) (Cytochrome P-450MP) (Cytochrome P450 MP-4) (Cytochrome P450 MP-8) (Cytochrome P450 PB-1) (S-mephenytoin 4-hydroxylase)	0.110256	67	HP:0003146	Hypocholesterolemia
Q9ULC5	ACSL5 ACS5 FACL5 UNQ633/PRO1250	51703	Long-chain-fatty-acid--CoA ligase 5 (EC 6.2.1.3) (Arachidonate--CoA ligase) (EC 6.2.1.15) (Long-chain acyl-CoA synthetase 5) (LACS 5)	0.11018	68	HP:0003146	Hypocholesterolemia
O95749	GGPS1	9453	Geranylgeranyl pyrophosphate synthase (GGPP synthase) (GGPPSase) (EC 2.5.1.-) ((2E,6E)-farnesyl diphosphate synthase) (Dimethylallyltranstransferase) (EC 2.5.1.1) (Farnesyl diphosphate synthase) (Farnesyltranstransferase) (EC 2.5.1.29) (Geranylgeranyl diphosphate synthase) (Geranyltranstransferase) (EC 2.5.1.10)	0.110042	69	HP:0003146	Hypocholesterolemia
Q99720	SIGMAR1 OPRS1 SRBP AAG8	10280	Sigma non-opioid intracellular receptor 1 (Aging-associated gene 8 protein) (SR31747-binding protein) (SR-BP) (Sigma 1-type opioid receptor) (SIG-1R) (Sigma1-receptor) (Sigma1R) (hSigmaR1)	0.10994	70	HP:0003146	Hypocholesterolemia
O60427	FADS1 FADSD5	3992	Acyl-CoA (8-3)-desaturase (EC 1.14.19.44) (Delta(5) fatty acid desaturase) (D5D) (Delta(5) desaturase) (Delta-5 desaturase) (Fatty acid desaturase 1)	0.109216	71	HP:0003146	Hypocholesterolemia
Q86SK9	SCD5 ACOD4 SCD2 SCD4	79966	Stearoyl-CoA desaturase 5 (EC 1.14.19.1) (Acyl-CoA-desaturase 4) (HSCD5) (Stearoyl-CoA 9-desaturase) (Stearoyl-CoA desaturase 2)	0.10751	72	HP:0003146	Hypocholesterolemia
Q4L235	AASDH ACSF4 U26 HSPC318	132949	Beta-alanine-activating enzyme (EC 6.2.1.-) (Acyl-CoA synthetase family member 4) (Protein NRPS998)	0.105694	73	HP:0003146	Hypocholesterolemia
Q03426	MVK	4598	Mevalonate kinase (MK) (EC 2.7.1.36)	0.105592	74	HP:0003146	Hypocholesterolemia
O95992	CH25H	9023	Cholesterol 25-hydroxylase (EC 1.14.99.38) (Cholesterol 25-monooxygenase) (h25OH)	0.105362	75	HP:0003146	Hypocholesterolemia
Q9UGP8	SEC63 SEC63L	11231	Translocation protein SEC63 homolog	0.104625	76	HP:0003146	Hypocholesterolemia
Q5TCH4	CYP4A22	284541	Cytochrome P450 4A22 (CYPIVA22) (Fatty acid omega-hydroxylase) (Lauric acid omega-hydroxylase) (Long-chain fatty acid omega-monooxygenase) (EC 1.14.14.80)	0.102342	77	HP:0003146	Hypocholesterolemia
O96011	PEX11B	8799	Peroxisomal membrane protein 11B (Peroxin-11B) (Peroxisomal biogenesis factor 11B) (Protein PEX11 homolog beta) (PEX11-beta)	0.101728	78	HP:0003146	Hypocholesterolemia
P53602	MVD MPD	4597	Diphosphomevalonate decarboxylase (EC 4.1.1.33) (Mevalonate (diphospho)decarboxylase) (MDDase) (Mevalonate pyrophosphate decarboxylase)	0.100917	79	HP:0003146	Hypocholesterolemia
Q15126	PMVK PMKI	10654	Phosphomevalonate kinase (PMKase) (hPMK) (EC 2.7.4.2)	0.0995817	80	HP:0003146	Hypocholesterolemia
