# Supplementary material for: Integration of Human Protein Sequence and Protein-Protein Interaction Data by Graph Autoencoder to Identify Novel Protein-Abnormal Phenotype Associations
Source: Cells. 2022 Aug 10;11(16):2485. doi: 10.3390/cells11162485 (PMC9406402; doi:10.3390/cells11162485)
Supplement: Supplementary file 1 [file cells-11-02485-s001.zip › Supplementary Table S6.xlsx]

## Sheet: Table S6
Supplementary Table S6. Predicted gene phenotype association dataset.
A comprehensive predicted gene phenotype association dataset involving 4369 diseases/phenotypes, top-150 prioritized genes for each phenotype are shown.
Entrez Gene ID	Uniprot ID	Gene Symbol	Protein name	HPO Term ID	HPO Term name	Rank
84865	Q17RM4	CC142	Coiled-coil domain-containing protein 142	HP:0000002	Abnormality of body height	1
2186	Q12830	BPTF	Nucleosome-remodeling factor subunit BPTF (Bromodomain and PHD finger-containing transcription factor) (Fetal Alz-50 clone 1 protein) (Fetal Alzheimer antigen)	HP:0000002	Abnormality of body height	2
1277	P02452	CO1A1	Collagen alpha-1(I) chain (Alpha-1 type I collagen)	HP:0000002	Abnormality of body height	3
3265	P01112	RASH	GTPase HRas (EC 3.6.5.2) (H-Ras-1) (Ha-Ras) (Transforming protein p21) (c-H-ras) (p21ras) [Cleaved into: GTPase HRas, N-terminally processed]	HP:0000002	Abnormality of body height	4
1280	P02458	CO2A1	Collagen alpha-1(II) chain (Alpha-1 type II collagen) [Cleaved into: Collagen alpha-1(II) chain; Chondrocalcin]	HP:0000002	Abnormality of body height	5
1281	P02461	CO3A1	Collagen alpha-1(III) chain	HP:0000002	Abnormality of body height	6
1301	P12107	COBA1	Collagen alpha-1(XI) chain	HP:0000002	Abnormality of body height	7
5290	P42336	PK3CA	Phosphatidylinositol 4,5-bisphosphate 3-kinase catalytic subunit alpha isoform (PI3-kinase subunit alpha) (PI3K-alpha) (PI3Kalpha) (PtdIns-3-kinase subunit alpha) (EC 2.7.1.137) (EC 2.7.1.153) (Phosphatidylinositol 4,5-bisphosphate 3-kinase 110 kDa catalytic subunit alpha) (PtdIns-3-kinase subunit p110-alpha) (p110alpha) (Phosphoinositide 3-kinase alpha) (Phosphoinositide-3-kinase catalytic alpha…	HP:0000002	Abnormality of body height	8
26160	Q9UG01	IF172	Intraflagellar transport protein 172 homolog	HP:0000002	Abnormality of body height	9
4763	P21359	NF1	Neurofibromin (Neurofibromatosis-related protein NF-1) [Cleaved into: Neurofibromin truncated]	HP:0000002	Abnormality of body height	10
91147	Q5HYA8	MKS3	Meckelin (Meckel syndrome type 3 protein) (Transmembrane protein 67)	HP:0000002	Abnormality of body height	11
1499	P35222	CTNB1	Catenin beta-1 (Beta-catenin)	HP:0000002	Abnormality of body height	12
1278	P08123	CO1A2	Collagen alpha-2(I) chain (Alpha-2 type I collagen)	HP:0000002	Abnormality of body height	13
1290	P05997	CO5A2	Collagen alpha-2(V) chain	HP:0000002	Abnormality of body height	14
58508	Q8NEZ4	KMT2C	Histone-lysine N-methyltransferase 2C (Lysine N-methyltransferase 2C) (EC 2.1.1.354) (Homologous to ALR protein) (Myeloid/lymphoid or mixed-lineage leukemia protein 3)	HP:0000002	Abnormality of body height	15
675	P51587	BRCA2	Breast cancer type 2 susceptibility protein (Fanconi anemia group D1 protein)	HP:0000002	Abnormality of body height	16
374654	Q2M1P5	KIF7	Kinesin-like protein KIF7	HP:0000002	Abnormality of body height	17
3845	P01116	RASK	GTPase KRas (EC 3.6.5.2) (K-Ras 2) (Ki-Ras) (c-K-ras) (c-Ki-ras) [Cleaved into: GTPase KRas, N-terminally processed]	HP:0000002	Abnormality of body height	18
8085	O14686	KMT2D	Histone-lysine N-methyltransferase 2D (Lysine N-methyltransferase 2D) (EC 2.1.1.354) (ALL1-related protein) (Myeloid/lymphoid or mixed-lineage leukemia protein 2)	HP:0000002	Abnormality of body height	19
9757	Q9UMN6	KMT2B	Histone-lysine N-methyltransferase 2B (Lysine N-methyltransferase 2B) (EC 2.1.1.354) (Myeloid/lymphoid or mixed-lineage leukemia protein 4) (Trithorax homolog 2) (WW domain-binding protein 7) (WBP-7)	HP:0000002	Abnormality of body height	20
23067	Q9UPS6	SET1B	Histone-lysine N-methyltransferase SETD1B (EC 2.1.1.354) (Lysine N-methyltransferase 2G) (SET domain-containing protein 1B) (hSET1B)	HP:0000002	Abnormality of body height	21
4297	Q03164	KMT2A	Histone-lysine N-methyltransferase 2A (Lysine N-methyltransferase 2A) (EC 2.1.1.354) (ALL-1) (CXXC-type zinc finger protein 7) (Myeloid/lymphoid or mixed-lineage leukemia) (Myeloid/lymphoid or mixed-lineage leukemia protein 1) (Trithorax-like protein) (Zinc finger protein HRX) [Cleaved into: MLL cleavage product N320 (N-terminal cleavage product of 320 kDa) (p320); MLL cleavage product C180 (C-te…	HP:0000002	Abnormality of body height	22
57492	Q8NFD5	ARI1B	AT-rich interactive domain-containing protein 1B (ARID domain-containing protein 1B) (BRG1-associated factor 250b) (BAF250B) (BRG1-binding protein hELD/OSA1) (Osa homolog 2) (hOsa2) (p250R)	HP:0000002	Abnormality of body height	23
5728	P60484	PTEN	Phosphatidylinositol 3,4,5-trisphosphate 3-phosphatase and dual-specificity protein phosphatase PTEN (EC 3.1.3.16) (EC 3.1.3.48) (EC 3.1.3.67) (Mutated in multiple advanced cancers 1) (Phosphatase and tensin homolog)	HP:0000002	Abnormality of body height	24
7403	O15550	KDM6A	Lysine-specific demethylase 6A (EC 1.14.11.68) (Histone demethylase UTX) (Ubiquitously-transcribed TPR protein on the X chromosome) (Ubiquitously-transcribed X chromosome tetratricopeptide repeat protein) ([histone H3]-trimethyl-L-lysine(27) demethylase 6A)	HP:0000002	Abnormality of body height	25
57545	Q9P2K1	C2D2A	Coiled-coil and C2 domain-containing protein 2A	HP:0000002	Abnormality of body height	26
1289	P20908	CO5A1	Collagen alpha-1(V) chain	HP:0000002	Abnormality of body height	27
8289	O14497	ARI1A	AT-rich interactive domain-containing protein 1A (ARID domain-containing protein 1A) (B120) (BRG1-associated factor 250) (BAF250) (BRG1-associated factor 250a) (BAF250A) (Osa homolog 1) (hOSA1) (SWI-like protein) (SWI/SNF complex protein p270) (SWI/SNF-related, matrix-associated, actin-dependent regulator of chromatin subfamily F member 1) (hELD)	HP:0000002	Abnormality of body height	28
2737	P10071	GLI3	Transcriptional activator GLI3 (GLI3 form of 190 kDa) (GLI3-190) (GLI3 full-length protein) (GLI3FL) [Cleaved into: Transcriptional repressor GLI3R (GLI3 C-terminally truncated form) (GLI3 form of 83 kDa) (GLI3-83)]	HP:0000002	Abnormality of body height	29
6597	P51532	SMCA4	Transcription activator BRG1 (EC 3.6.4.-) (ATP-dependent helicase SMARCA4) (BRG1-associated factor 190A) (BAF190A) (Mitotic growth and transcription activator) (Protein BRG-1) (Protein brahma homolog 1) (SNF2-beta) (SWI/SNF-related matrix-associated actin-dependent regulator of chromatin subfamily A member 4)	HP:0000002	Abnormality of body height	30
25836	Q6KC79	NIPBL	Nipped-B-like protein (Delangin) (SCC2 homolog)	HP:0000002	Abnormality of body height	31
57680	Q9HCK8	CHD8	Chromodomain-helicase-DNA-binding protein 8 (CHD-8) (EC 3.6.4.12) (ATP-dependent helicase CHD8) (Helicase with SNF2 domain 1)	HP:0000002	Abnormality of body height	32
79809	Q7Z4L5	TT21B	Tetratricopeptide repeat protein 21B (TPR repeat protein 21B) (Intraflagellar transport 139 homolog)	HP:0000002	Abnormality of body height	33
8295	Q9Y4A5	TRRAP	Transformation/transcription domain-associated protein (350/400 kDa PCAF-associated factor) (PAF350/400) (STAF40) (Tra1 homolog)	HP:0000002	Abnormality of body height	34
9739	O15047	SET1A	Histone-lysine N-methyltransferase SETD1A (EC 2.1.1.354) (Lysine N-methyltransferase 2F) (SET domain-containing protein 1A) (hSET1A) (Set1/Ash2 histone methyltransferase complex subunit SET1)	HP:0000002	Abnormality of body height	35
3065	Q13547	HDAC1	Histone deacetylase 1 (HD1) (EC 3.5.1.98)	HP:0000002	Abnormality of body height	36
29072	Q9BYW2	SETD2	Histone-lysine N-methyltransferase SETD2 (EC 2.1.1.359) (HIF-1) (Huntingtin yeast partner B) (Huntingtin-interacting protein 1) (HIP-1) (Huntingtin-interacting protein B) (Lysine N-methyltransferase 3A) (Protein-lysine N-methyltransferase SETD2) (EC 2.1.1.-) (SET domain-containing protein 2) (hSET2) (p231HBP)	HP:0000002	Abnormality of body height	37
132884	Q86UK5	LBN	Limbin (Ellis-van Creveld syndrome protein 2) (EVC2)	HP:0000002	Abnormality of body height	38
2736	P10070	GLI2	Zinc finger protein GLI2 (GLI family zinc finger protein 2) (Tax helper protein)	HP:0000002	Abnormality of body height	39
57560	Q9P2H3	IFT80	Intraflagellar transport protein 80 homolog (WD repeat-containing protein 56)	HP:0000002	Abnormality of body height	40
51363	Q7LFX5	CHSTF	Carbohydrate sulfotransferase 15 (EC 2.8.2.33) (B-cell RAG-associated gene protein) (hBRAG) (N-acetylgalactosamine 4-sulfate 6-O-sulfotransferase) (GalNAc4S-6ST)	HP:0000002	Abnormality of body height	41
55764	Q9HBG6	IF122	Intraflagellar transport protein 122 homolog (WD repeat-containing protein 10) (WD repeat-containing protein 140)	HP:0000002	Abnormality of body height	42
440686	Q5TEC6	H3PS2	Histone HIST2H3PS2	HP:0000002	Abnormality of body height	43
55870	Q9NR48	ASH1L	Histone-lysine N-methyltransferase ASH1L (EC 2.1.1.359) (EC 2.1.1.367) (ASH1-like protein) (huASH1) (Absent small and homeotic disks protein 1 homolog) (Lysine N-methyltransferase 2H)	HP:0000002	Abnormality of body height	44
54903	Q9NXB0	MKS1	Meckel syndrome type 1 protein	HP:0000002	Abnormality of body height	45
51684	Q9UMX1	SUFU	Suppressor of fused homolog (SUFUH)	HP:0000002	Abnormality of body height	46
79583	Q9H6L2	TM231	Transmembrane protein 231	HP:0000002	Abnormality of body height	47
1300	Q03692	COAA1	Collagen alpha-1(X) chain	HP:0000002	Abnormality of body height	48
672	P38398	BRCA1	Breast cancer type 1 susceptibility protein (EC 2.3.2.27) (RING finger protein 53) (RING-type E3 ubiquitin transferase BRCA1)	HP:0000002	Abnormality of body height	49
3066	Q92769	HDAC2	Histone deacetylase 2 (HD2) (EC 3.5.1.98)	HP:0000002	Abnormality of body height	50
369	P10398	ARAF	Serine/threonine-protein kinase A-Raf (EC 2.7.11.1) (Proto-oncogene A-Raf) (Proto-oncogene A-Raf-1) (Proto-oncogene Pks)	HP:0000002	Abnormality of body height	51
196528	Q68CP9	ARID2	AT-rich interactive domain-containing protein 2 (ARID domain-containing protein 2) (BRG1-associated factor 200) (BAF200) (Zinc finger protein with activation potential) (Zipzap/p200)	HP:0000002	Abnormality of body height	52
57728	Q8NEZ3	WDR19	WD repeat-containing protein 19 (Intraflagellar transport 144 homolog)	HP:0000002	Abnormality of body height	53
2177	Q9BXW9	FACD2	Fanconi anemia group D2 protein (Protein FACD2)	HP:0000002	Abnormality of body height	54
2146	Q15910	EZH2	Histone-lysine N-methyltransferase EZH2 (EC 2.1.1.356) (ENX-1) (Enhancer of zeste homolog 2) (Lysine N-methyltransferase 6)	HP:0000002	Abnormality of body height	55
472	Q13315	ATM	Serine-protein kinase ATM (EC 2.7.11.1) (Ataxia telangiectasia mutated) (A-T mutated)	HP:0000002	Abnormality of body height	56
64324	Q96L73	NSD1	Histone-lysine N-methyltransferase, H3 lysine-36 specific (EC 2.1.1.357) (Androgen receptor coactivator 267 kDa protein) (Androgen receptor-associated protein of 267 kDa) (H3-K36-HMTase) (Lysine N-methyltransferase 3B) (Nuclear receptor-binding SET domain-containing protein 1) (NR-binding SET domain-containing protein)	HP:0000002	Abnormality of body height	57
2135	Q9UBQ6	EXTL2	Exostosin-like 2 (EC 2.4.1.223) (Alpha-1,4-N-acetylhexosaminyltransferase EXTL2) (Alpha-GalNAcT EXTL2) (EXT-related protein 2) (Glucuronyl-galactosyl-proteoglycan 4-alpha-N-acetylglucosaminyltransferase) [Cleaved into: Processed exostosin-like 2]	HP:0000002	Abnormality of body height	58
9320	Q14669	TRIPC	E3 ubiquitin-protein ligase TRIP12 (EC 2.3.2.26) (E3 ubiquitin-protein ligase for Arf) (ULF) (HECT-type E3 ubiquitin transferase TRIP12) (Thyroid receptor-interacting protein 12) (TR-interacting protein 12) (TRIP-12)	HP:0000002	Abnormality of body height	59
54480	Q9P2E5	CHPF2	Chondroitin sulfate glucuronyltransferase (EC 2.4.1.226) (CSGlcA-T) (Chondroitin glucuronyltransferase) (Chondroitin polymerizing factor 2) (ChPF-2) (Chondroitin synthase 3) (ChSy-3) (N-acetylgalactosaminyl-proteoglycan 3-beta-glucuronosyltransferase)	HP:0000002	Abnormality of body height	60
79728	Q86YC2	PALB2	Partner and localizer of BRCA2	HP:0000002	Abnormality of body height	61
8242	P41229	KDM5C	Lysine-specific demethylase 5C (EC 1.14.11.67) (Histone demethylase JARID1C) (Jumonji/ARID domain-containing protein 1C) (Protein SmcX) (Protein Xe169) ([histone H3]-trimethyl-L-lysine(4) demethylase 5C)	HP:0000002	Abnormality of body height	62
4204	P51608	MECP2	Methyl-CpG-binding protein 2 (MeCp-2 protein) (MeCp2)	HP:0000002	Abnormality of body height	63
991	Q12834	CDC20	Cell division cycle protein 20 homolog (p55CDC)	HP:0000002	Abnormality of body height	64
54806	Q8N157	AHI1	Jouberin (Abelson helper integration site 1 protein homolog) (AHI-1)	HP:0000002	Abnormality of body height	65
10075	Q7Z6Z7	HUWE1	E3 ubiquitin-protein ligase HUWE1 (EC 2.3.2.26) (ARF-binding protein 1) (ARF-BP1) (HECT, UBA and WWE domain-containing protein 1) (HECT-type E3 ubiquitin transferase HUWE1) (Homologous to E6AP carboxyl terminus homologous protein 9) (HectH9) (Large structure of UREB1) (LASU1) (Mcl-1 ubiquitin ligase E3) (Mule) (Upstream regulatory element-binding protein 1) (URE-B1) (URE-binding protein 1)	HP:0000002	Abnormality of body height	66
5980	O60673	REV3L	DNA polymerase zeta catalytic subunit (EC 2.7.7.7) (Protein reversionless 3-like) (REV3-like) (hREV3)	HP:0000002	Abnormality of body height	67
546	P46100	ATRX	Transcriptional regulator ATRX (EC 3.6.4.12) (ATP-dependent helicase ATRX) (X-linked helicase II) (X-linked nuclear protein) (XNP) (Znf-HX)	HP:0000002	Abnormality of body height	68
9786	Q9BVV6	TALD3	Protein TALPID3	HP:0000002	Abnormality of body height	69
1111	O14757	CHK1	Serine/threonine-protein kinase Chk1 (EC 2.7.11.1) (CHK1 checkpoint homolog) (Cell cycle checkpoint kinase) (Checkpoint kinase-1)	HP:0000002	Abnormality of body height	70
55193	Q86U86	PB1	Protein polybromo-1 (hPB1) (BRG1-associated factor 180) (BAF180) (Polybromo-1D)	HP:0000002	Abnormality of body height	71
6608	Q99835	SMO	Smoothened homolog (SMO) (Protein Gx)	HP:0000002	Abnormality of body height	72
79867	Q96GX1	TECT2	Tectonic-2	HP:0000002	Abnormality of body height	73
2033	Q09472	EP300	Histone acetyltransferase p300 (p300 HAT) (EC 2.3.1.48) (E1A-associated protein p300) (Histone butyryltransferase p300) (EC 2.3.1.-) (Histone crotonyltransferase p300) (EC 2.3.1.-) (Protein 2-hydroxyisobutyryltransferase p300) (EC 2.3.1.-) (Protein lactyltransferas p300) (EC 2.3.1.-) (Protein propionyltransferase p300) (EC 2.3.1.-)	HP:0000002	Abnormality of body height	74
1107	Q12873	CHD3	Chromodomain-helicase-DNA-binding protein 3 (CHD-3) (EC 3.6.4.12) (ATP-dependent helicase CHD3) (Mi-2 autoantigen 240 kDa protein) (Mi2-alpha) (Zinc finger helicase) (hZFH)	HP:0000002	Abnormality of body height	75
8100	Q13099	IFT88	Intraflagellar transport protein 88 homolog (Recessive polycystic kidney disease protein Tg737 homolog) (Tetratricopeptide repeat protein 10) (TPR repeat protein 10)	HP:0000002	Abnormality of body height	76
1108	Q14839	CHD4	Chromodomain-helicase-DNA-binding protein 4 (CHD-4) (EC 3.6.4.12) (ATP-dependent helicase CHD4) (Mi-2 autoantigen 218 kDa protein) (Mi2-beta)	HP:0000002	Abnormality of body height	77
6595	P51531	SMCA2	Probable global transcription activator SNF2L2 (EC 3.6.4.-) (ATP-dependent helicase SMARCA2) (BRG1-associated factor 190B) (BAF190B) (Protein brahma homolog) (hBRM) (SNF2-alpha) (SWI/SNF-related matrix-associated actin-dependent regulator of chromatin subfamily A member 2)	HP:0000002	Abnormality of body height	78
1387	Q92793	CBP	CREB-binding protein (Histone lysine acetyltransferase CREBBP) (EC 2.3.1.48) (Protein-lysine acetyltransferase CREBBP) (EC 2.3.1.-)	HP:0000002	Abnormality of body height	79
8509	P52849	NDST2	Bifunctional heparan sulfate N-deacetylase/N-sulfotransferase 2 (EC 2.8.2.8) (Glucosaminyl N-deacetylase/N-sulfotransferase 2) (NDST-2) (N-heparan sulfate sulfotransferase 2) (N-HSST 2) [Includes: Heparan sulfate N-deacetylase 2 (EC 3.-.-.-); Heparan sulfate N-sulfotransferase 2 (EC 2.8.2.-)]	HP:0000002	Abnormality of body height	80
55212	Q8IWZ6	BBS7	Bardet-Biedl syndrome 7 protein (BBS2-like protein 1)	HP:0000002	Abnormality of body height	81
673	P15056	BRAF	Serine/threonine-protein kinase B-raf (EC 2.7.11.1) (Proto-oncogene B-Raf) (p94) (v-Raf murine sarcoma viral oncogene homolog B1)	HP:0000002	Abnormality of body height	82
5347	P53350	PLK1	Serine/threonine-protein kinase PLK1 (EC 2.7.11.21) (Polo-like kinase 1) (PLK-1) (Serine/threonine-protein kinase 13) (STPK13)	HP:0000002	Abnormality of body height	83
9968	Q93074	MED12	Mediator of RNA polymerase II transcription subunit 12 (Activator-recruited cofactor 240 kDa component) (ARC240) (CAG repeat protein 45) (Mediator complex subunit 12) (OPA-containing protein) (Thyroid hormone receptor-associated protein complex 230 kDa component) (Trap230) (Trinucleotide repeat-containing gene 11 protein)	HP:0000002	Abnormality of body height	84
11200	O96017	CHK2	Serine/threonine-protein kinase Chk2 (EC 2.7.11.1) (CHK2 checkpoint homolog) (Cds1 homolog) (Hucds1) (hCds1) (Checkpoint kinase 2)	HP:0000002	Abnormality of body height	85
261734	O75161	NPHP4	Nephrocystin-4 (Nephroretinin)	HP:0000002	Abnormality of body height	86
983	P06493	CDK1	Cyclin-dependent kinase 1 (CDK1) (EC 2.7.11.22) (EC 2.7.11.23) (Cell division control protein 2 homolog) (Cell division protein kinase 1) (p34 protein kinase)	HP:0000002	Abnormality of body height	87
6594	P28370	SMCA1	Probable global transcription activator SNF2L1 (EC 3.6.4.-) (ATP-dependent helicase SMARCA1) (Nucleosome-remodeling factor subunit SNF2L) (SWI/SNF-related matrix-associated actin-dependent regulator of chromatin subfamily A member 1)	HP:0000002	Abnormality of body height	88
55454	Q8N6G5	CGAT2	Chondroitin sulfate N-acetylgalactosaminyltransferase 2 (EC 2.4.1.174) (Chondroitin beta-1,4-N-acetylgalactosaminyltransferase 2) (Beta4GalNAcT-2) (GalNAcT-2)	HP:0000002	Abnormality of body height	89
6872	P21675	TAF1	Transcription initiation factor TFIID subunit 1 (EC 2.3.1.48) (EC 2.7.11.1) (Cell cycle gene 1 protein) (TBP-associated factor 250 kDa) (p250) (Transcription initiation factor TFIID 250 kDa subunit) (TAF(II)250) (TAFII-250) (TAFII250)	HP:0000002	Abnormality of body height	90
23322	Q68CZ1	FTM	Protein fantom (Nephrocystin-8) (RPGR-interacting protein 1-like protein) (RPGRIP1-like protein)	HP:0000002	Abnormality of body height	91
207	P31749	AKT1	RAC-alpha serine/threonine-protein kinase (EC 2.7.11.1) (Protein kinase B) (PKB) (Protein kinase B alpha) (PKB alpha) (Proto-oncogene c-Akt) (RAC-PK-alpha)	HP:0000002	Abnormality of body height	92
79586	Q8IZ52	CHSS2	Chondroitin sulfate synthase 2 (EC 2.4.1.175) (EC 2.4.1.226) (Chondroitin glucuronyltransferase 2) (Chondroitin-polymerizing factor) (ChPF) (Glucuronosyl-N-acetylgalactosaminyl-proteoglycan 4-beta-N-acetylgalactosaminyltransferase II) (N-acetylgalactosaminyl-proteoglycan 3-beta-glucuronosyltransferase II) (N-acetylgalactosaminyltransferase 2)	HP:0000002	Abnormality of body height	93
1105	O14646	CHD1	Chromodomain-helicase-DNA-binding protein 1 (CHD-1) (EC 3.6.4.12) (ATP-dependent helicase CHD1)	HP:0000002	Abnormality of body height	94
90410	Q8IY31	IFT20	Intraflagellar transport protein 20 homolog (hIFT20)	HP:0000002	Abnormality of body height	95
79659	Q8NCM8	DYHC2	Cytoplasmic dynein 2 heavy chain 1 (Cytoplasmic dynein 2 heavy chain) (Dynein cytoplasmic heavy chain 2) (Dynein heavy chain 11) (hDHC11) (Dynein heavy chain isotype 1B)	HP:0000002	Abnormality of body height	96
79600	Q2MV58	TECT1	Tectonic-1	HP:0000002	Abnormality of body height	97
23512	Q15022	SUZ12	Polycomb protein SUZ12 (Chromatin precipitated E2F target 9 protein) (ChET 9 protein) (Joined to JAZF1 protein) (Suppressor of zeste 12 protein homolog)	HP:0000002	Abnormality of body height	98
55636	Q9P2D1	CHD7	Chromodomain-helicase-DNA-binding protein 7 (CHD-7) (EC 3.6.4.12) (ATP-dependent helicase CHD7)	HP:0000002	Abnormality of body height	99
2648	Q92830	KAT2A	Histone acetyltransferase KAT2A (EC 2.3.1.48) (General control of amino acid synthesis protein 5-like 2) (Histone acetyltransferase GCN5) (hGCN5) (Histone glutaryltransferase KAT2A) (EC 2.3.1.-) (Histone succinyltransferase KAT2A) (EC 2.3.1.-) (Lysine acetyltransferase 2A) (STAF97)	HP:0000002	Abnormality of body height	100
9469	Q7LGC8	CHST3	Carbohydrate sulfotransferase 3 (EC 2.8.2.17) (Chondroitin 6-O-sulfotransferase 1) (C6ST-1) (Chondroitin 6-sulfotransferase) (Galactose/N-acetylglucosamine/N-acetylglucosamine 6-O-sulfotransferase 0) (GST-0)	HP:0000002	Abnormality of body height	101
9953	Q9Y662	HS3SB	Heparan sulfate glucosamine 3-O-sulfotransferase 3B1 (EC 2.8.2.30) (Heparan sulfate D-glucosaminyl 3-O-sulfotransferase 3B1) (3-OST-3B) (Heparan sulfate 3-O-sulfotransferase 3B1) (h3-OST-3B)	HP:0000002	Abnormality of body height	102
26005	Q4AC94	C2CD3	C2 domain-containing protein 3	HP:0000002	Abnormality of body height	103
5894	P04049	RAF1	RAF proto-oncogene serine/threonine-protein kinase (EC 2.7.11.1) (Proto-oncogene c-RAF) (cRaf) (Raf-1)	HP:0000002	Abnormality of body height	104
23476	O60885	BRD4	Bromodomain-containing protein 4 (Protein HUNK1)	HP:0000002	Abnormality of body height	105
51366	O95071	UBR5	E3 ubiquitin-protein ligase UBR5 (EC 2.3.2.26) (E3 ubiquitin-protein ligase, HECT domain-containing 1) (HECT-type E3 ubiquitin transferase UBR5) (Hyperplastic discs protein homolog) (hHYD) (Progestin-induced protein)	HP:0000002	Abnormality of body height	106
7994	Q92794	KAT6A	Histone acetyltransferase KAT6A (EC 2.3.1.48) (MOZ, YBF2/SAS3, SAS2 and TIP60 protein 3) (MYST-3) (Monocytic leukemia zinc finger protein) (Runt-related transcription factor-binding protein 2) (Zinc finger protein 220)	HP:0000002	Abnormality of body height	107
27077	Q9UPM9	B9D1	B9 domain-containing protein 1 (MKS1-related protein 1)	HP:0000002	Abnormality of body height	108
6598	Q12824	SNF5	SWI/SNF-related matrix-associated actin-dependent regulator of chromatin subfamily B member 1 (BRG1-associated factor 47) (BAF47) (Integrase interactor 1 protein) (SNF5 homolog) (hSNF5)	HP:0000002	Abnormality of body height	109
4809	P55769	NH2L1	NHP2-like protein 1 (High mobility group-like nuclear protein 2 homolog 1) (OTK27) (SNU13 homolog) (hSNU13) (U4/U6.U5 small nuclear ribonucleoprotein SNU13) (U4/U6.U5 tri-snRNP 15.5 kDa protein) [Cleaved into: NHP2-like protein 1, N-terminally processed]	HP:0000002	Abnormality of body height	110
9070	Q9UBL3	ASH2L	Set1/Ash2 histone methyltransferase complex subunit ASH2 (ASH2-like protein)	HP:0000002	Abnormality of body height	111
27031	Q7Z494	NPHP3	Nephrocystin-3	HP:0000002	Abnormality of body height	112
57697	Q8IYD8	FANCM	Fanconi anemia group M protein (Protein FACM) (EC 3.6.4.13) (ATP-dependent RNA helicase FANCM) (Fanconi anemia-associated polypeptide of 250 kDa) (FAAP250) (Protein Hef ortholog)	HP:0000002	Abnormality of body height	113
9742	Q96RY7	IF140	Intraflagellar transport protein 140 homolog (WD and tetratricopeptide repeats protein 2)	HP:0000002	Abnormality of body height	114
65250	Q9H799	CPLN1	Ciliogenesis and planar polarity effector 1 (Protein JBTS17)	HP:0000002	Abnormality of body height	115
11073	Q92547	TOPB1	DNA topoisomerase 2-binding protein 1 (DNA topoisomerase II-beta-binding protein 1) (TopBP1) (DNA topoisomerase II-binding protein 1)	HP:0000002	Abnormality of body height	116
1303	Q99715	COCA1	Collagen alpha-1(XII) chain	HP:0000002	Abnormality of body height	117
6599	Q92922	SMRC1	SWI/SNF complex subunit SMARCC1 (BRG1-associated factor 155) (BAF155) (SWI/SNF complex 155 kDa subunit) (SWI/SNF-related matrix-associated actin-dependent regulator of chromatin subfamily C member 1)	HP:0000002	Abnormality of body height	118
2735	P08151	GLI1	Zinc finger protein GLI1 (Glioma-associated oncogene) (Oncogene GLI)	HP:0000002	Abnormality of body height	119
23028	O60341	KDM1A	Lysine-specific histone demethylase 1A (EC 1.14.99.66) (BRAF35-HDAC complex protein BHC110) (Flavin-containing amine oxidase domain-containing protein 2) ([histone H3]-dimethyl-L-lysine(4) FAD-dependent demethylase 1A)	HP:0000002	Abnormality of body height	120
57634	Q96L91	EP400	E1A-binding protein p400 (EC 3.6.4.-) (CAG repeat protein 32) (Domino homolog) (hDomino) (Trinucleotide repeat-containing gene 12 protein) (p400 kDa SWI2/SNF2-related protein)	HP:0000002	Abnormality of body height	121
8850	Q92831	KAT2B	Histone acetyltransferase KAT2B (EC 2.3.1.48) (Histone acetyltransferase PCAF) (Histone acetylase PCAF) (Lysine acetyltransferase 2B) (P300/CBP-associated factor) (P/CAF) (Spermidine acetyltransferase KAT2B) (EC 2.3.1.57)	HP:0000002	Abnormality of body height	122
25942	Q96ST3	SIN3A	Paired amphipathic helix protein Sin3a (Histone deacetylase complex subunit Sin3a) (Transcriptional corepressor Sin3a)	HP:0000002	Abnormality of body height	123
64132	Q9H1B5	XYLT2	Xylosyltransferase 2 (EC 2.4.2.26) (Peptide O-xylosyltransferase 1) (Xylosyltransferase II) (XT-II) (XylT-II)	HP:0000002	Abnormality of body height	124
9612	Q9Y618	NCOR2	Nuclear receptor corepressor 2 (N-CoR2) (CTG repeat protein 26) (SMAP270) (Silencing mediator of retinoic acid and thyroid hormone receptor) (SMRT) (T3 receptor-associating factor) (TRAC) (Thyroid-, retinoic-acid-receptor-associated corepressor)	HP:0000002	Abnormality of body height	125
1291	P12109	CO6A1	Collagen alpha-1(VI) chain	HP:0000002	Abnormality of body height	126
8573	O14936	CSKP	Peripheral plasma membrane protein CASK (hCASK) (EC 2.7.11.1) (Calcium/calmodulin-dependent serine protein kinase) (Protein lin-2 homolog)	HP:0000002	Abnormality of body height	127
113189	Q8NCH0	CHSTE	Carbohydrate sulfotransferase 14 (EC 2.8.2.35) (Dermatan 4-sulfotransferase 1) (D4ST-1) (hD4ST1)	HP:0000002	Abnormality of body height	128
26229	O94766	B3GA3	Galactosylgalactosylxylosylprotein 3-beta-glucuronosyltransferase 3 (EC 2.4.1.135) (Beta-1,3-glucuronyltransferase 3) (Glucuronosyltransferase I) (GlcAT-I) (UDP-GlcUA:Gal beta-1,3-Gal-R glucuronyltransferase) (GlcUAT-I)	HP:0000002	Abnormality of body height	129
57539	Q9P2L0	WDR35	WD repeat-containing protein 35 (Intraflagellar transport protein 121 homolog)	HP:0000002	Abnormality of body height	130
64131	Q86Y38	XYLT1	Xylosyltransferase 1 (EC 2.4.2.26) (Peptide O-xylosyltransferase 1) (Xylosyltransferase I) (XT-I) (XylT-I)	HP:0000002	Abnormality of body height	131
6194	P62753	RS6	40S ribosomal protein S6 (Phosphoprotein NP33) (Small ribosomal subunit protein eS6)	HP:0000002	Abnormality of body height	132
51154	Q9UKD2	MRT4	mRNA turnover protein 4 homolog (Ribosome assembly factor MRTO4)	HP:0000002	Abnormality of body height	133
545	Q13535	ATR	Serine/threonine-protein kinase ATR (EC 2.7.11.1) (Ataxia telangiectasia and Rad3-related protein) (FRAP-related protein 1)	HP:0000002	Abnormality of body height	134
585	Q96RK4	BBS4	Bardet-Biedl syndrome 4 protein	HP:0000002	Abnormality of body height	135
6144	P46778	RL21	60S ribosomal protein L21 (Large ribosomal subunit protein eL21)	HP:0000002	Abnormality of body height	136
10524	Q92993	KAT5	Histone acetyltransferase KAT5 (EC 2.3.1.48) (60 kDa Tat-interactive protein) (Tip60) (Histone acetyltransferase HTATIP) (HIV-1 Tat interactive protein) (Lysine acetyltransferase 5) (cPLA(2)-interacting protein)	HP:0000002	Abnormality of body height	137
80184	O15078	CE290	Centrosomal protein of 290 kDa (Cep290) (Bardet-Biedl syndrome 14 protein) (Cancer/testis antigen 87) (CT87) (Nephrocystin-6) (Tumor antigen se2-2)	HP:0000002	Abnormality of body height	138
6601	Q8TAQ2	SMRC2	SWI/SNF complex subunit SMARCC2 (BRG1-associated factor 170) (BAF170) (SWI/SNF complex 170 kDa subunit) (SWI/SNF-related matrix-associated actin-dependent regulator of chromatin subfamily C member 2)	HP:0000002	Abnormality of body height	139
55790	Q8TDX6	CGAT1	Chondroitin sulfate N-acetylgalactosaminyltransferase 1 (CsGalNAcT-1) (EC 2.4.1.174) (Chondroitin beta-1,4-N-acetylgalactosaminyltransferase 1) (Beta4GalNAcT-1)	HP:0000002	Abnormality of body height	140
27130	Q9Y283	INVS	Inversin (Inversion of embryo turning homolog) (Nephrocystin-2)	HP:0000002	Abnormality of body height	141
2134	Q92935	EXTL1	Exostosin-like 1 (EC 2.4.1.224) (Exostosin-L) (Glucuronosyl-N-acetylglucosaminyl-proteoglycan 4-alpha-N-acetylglucosaminyltransferase) (Multiple exostosis-like protein)	HP:0000002	Abnormality of body height	142
6206	P25398	RS12	40S ribosomal protein S12 (Small ribosomal subunit protein eS12)	HP:0000002	Abnormality of body height	143
7337	Q05086	UBE3A	Ubiquitin-protein ligase E3A (EC 2.3.2.26) (E6AP ubiquitin-protein ligase) (HECT-type ubiquitin transferase E3A) (Human papillomavirus E6-associated protein) (Oncogenic protein-associated protein E6-AP) (Renal carcinoma antigen NY-REN-54)	HP:0000002	Abnormality of body height	144
9348	O95803	NDST3	Bifunctional heparan sulfate N-deacetylase/N-sulfotransferase 3 (EC 2.8.2.8) (Glucosaminyl N-deacetylase/N-sulfotransferase 3) (NDST-3) (hNDST-3) (N-heparan sulfate sulfotransferase 3) (N-HSST 3) [Includes: Heparan sulfate N-deacetylase 3 (EC 3.-.-.-); Heparan sulfate N-sulfotransferase 3 (EC 2.8.2.-)]	HP:0000002	Abnormality of body height	145
7311	P62987	RL40	Ubiquitin-60S ribosomal protein L40 (CEP52) (Ubiquitin A-52 residue ribosomal protein fusion product 1) [Cleaved into: Ubiquitin; 60S ribosomal protein L40 (Large ribosomal subunit protein eL40)]	HP:0000002	Abnormality of body height	146
135152	Q9NPZ5	B3GA2	Galactosylgalactosylxylosylprotein 3-beta-glucuronosyltransferase 2 (EC 2.4.1.135) (Beta-1,3-glucuronyltransferase 2) (GlcAT-D) (UDP-glucuronosyltransferase S) (GlcAT-S) (Glucuronosyltransferase S)	HP:0000002	Abnormality of body height	147
6208	P62263	RS14	40S ribosomal protein S14 (Small ribosomal subunit protein uS11)	HP:0000002	Abnormality of body height	148
6234	P62857	RS28	40S ribosomal protein S28 (Small ribosomal subunit protein eS28)	HP:0000002	Abnormality of body height	149
9611	O75376	NCOR1	Nuclear receptor corepressor 1 (N-CoR) (N-CoR1)	HP:0000002	Abnormality of body height	150
80184	O15078	CE290	Centrosomal protein of 290 kDa (Cep290) (Bardet-Biedl syndrome 14 protein) (Cancer/testis antigen 87) (CT87) (Nephrocystin-6) (Tumor antigen se2-2)	HP:0000003	Multicystic kidney dysplasia	1
57545	Q9P2K1	C2D2A	Coiled-coil and C2 domain-containing protein 2A	HP:0000003	Multicystic kidney dysplasia	2
23322	Q68CZ1	FTM	Protein fantom (Nephrocystin-8) (RPGR-interacting protein 1-like protein) (RPGRIP1-like protein)	HP:0000003	Multicystic kidney dysplasia	3
91147	Q5HYA8	MKS3	Meckelin (Meckel syndrome type 3 protein) (Transmembrane protein 67)	HP:0000003	Multicystic kidney dysplasia	4
261734	O75161	NPHP4	Nephrocystin-4 (Nephroretinin)	HP:0000003	Multicystic kidney dysplasia	5
4867	O15259	NPHP1	Nephrocystin-1 (Juvenile nephronophthisis 1 protein)	HP:0000003	Multicystic kidney dysplasia	6
54903	Q9NXB0	MKS1	Meckel syndrome type 1 protein	HP:0000003	Multicystic kidney dysplasia	7
79583	Q9H6L2	TM231	Transmembrane protein 231	HP:0000003	Multicystic kidney dysplasia	8
583	Q9BXC9	BBS2	Bardet-Biedl syndrome 2 protein	HP:0000003	Multicystic kidney dysplasia	9
65062	Q96Q45	TM237	Transmembrane protein 237 (Amyotrophic lateral sclerosis 2 chromosomal region candidate gene 4 protein)	HP:0000003	Multicystic kidney dysplasia	10
9786	Q9BVV6	TALD3	Protein TALPID3	HP:0000003	Multicystic kidney dysplasia	11
8481	O75665	OFD1	Oral-facial-digital syndrome 1 protein (Protein 71-7A)	HP:0000003	Multicystic kidney dysplasia	12
27077	Q9UPM9	B9D1	B9 domain-containing protein 1 (MKS1-related protein 1)	HP:0000003	Multicystic kidney dysplasia	13
585	Q96RK4	BBS4	Bardet-Biedl syndrome 4 protein	HP:0000003	Multicystic kidney dysplasia	14
51259	Q9P0N5	TM216	Transmembrane protein 216	HP:0000003	Multicystic kidney dysplasia	15
582	Q8NFJ9	BBS1	Bardet-Biedl syndrome 1 protein (BBS2-like protein 2)	HP:0000003	Multicystic kidney dysplasia	16
10806	Q86SQ7	SDCG8	Serologically defined colon cancer antigen 8 (Antigen NY-CO-8) (Centrosomal colon cancer autoantigen protein) (hCCCAP)	HP:0000003	Multicystic kidney dysplasia	17
55212	Q8IWZ6	BBS7	Bardet-Biedl syndrome 7 protein (BBS2-like protein 1)	HP:0000003	Multicystic kidney dysplasia	18
26160	Q9UG01	IF172	Intraflagellar transport protein 172 homolog	HP:0000003	Multicystic kidney dysplasia	19
51057	O95876	FRITZ	WD repeat-containing and planar cell polarity effector protein fritz homolog (hFRTZ) (Bardet-Biedl syndrome 15 protein) (WD repeat-containing and planar cell polarity effector protein)	HP:0000003	Multicystic kidney dysplasia	20
123016	Q8TAM2	TTC8	Tetratricopeptide repeat protein 8 (TPR repeat protein 8) (Bardet-Biedl syndrome 8 protein)	HP:0000003	Multicystic kidney dysplasia	21
166379	Q6ZW61	BBS12	Bardet-Biedl syndrome 12 protein	HP:0000003	Multicystic kidney dysplasia	22
27241	Q3SYG4	PTHB1	Protein PTHB1 (Bardet-Biedl syndrome 9 protein) (Parathyroid hormone-responsive B1 gene protein)	HP:0000003	Multicystic kidney dysplasia	23
79600	Q2MV58	TECT1	Tectonic-1	HP:0000003	Multicystic kidney dysplasia	24
79867	Q96GX1	TECT2	Tectonic-2	HP:0000003	Multicystic kidney dysplasia	25
57728	Q8NEZ3	WDR19	WD repeat-containing protein 19 (Intraflagellar transport 144 homolog)	HP:0000003	Multicystic kidney dysplasia	26
65250	Q9H799	CPLN1	Ciliogenesis and planar polarity effector 1 (Protein JBTS17)	HP:0000003	Multicystic kidney dysplasia	27
27130	Q9Y283	INVS	Inversin (Inversion of embryo turning homolog) (Nephrocystin-2)	HP:0000003	Multicystic kidney dysplasia	28
129880	Q8N3I7	BBS5	Bardet-Biedl syndrome 5 protein	HP:0000003	Multicystic kidney dysplasia	29
200894	Q3SXY8	AR13B	ADP-ribosylation factor-like protein 13B (ADP-ribosylation factor-like protein 2-like 1) (ARL2-like protein 1)	HP:0000003	Multicystic kidney dysplasia	30
200728	Q86X19	TMM17	Transmembrane protein 17	HP:0000003	Multicystic kidney dysplasia	31
54806	Q8N157	AHI1	Jouberin (Abelson helper integration site 1 protein homolog) (AHI-1)	HP:0000003	Multicystic kidney dysplasia	32
27031	Q7Z494	NPHP3	Nephrocystin-3	HP:0000003	Multicystic kidney dysplasia	33
167691	Q86VQ0	LCA5	Lebercilin (Leber congenital amaurosis 5 protein)	HP:0000003	Multicystic kidney dysplasia	34
51098	Q9Y366	IFT52	Intraflagellar transport protein 52 homolog (Protein NGD5 homolog)	HP:0000003	Multicystic kidney dysplasia	35
8100	Q13099	IFT88	Intraflagellar transport protein 88 homolog (Recessive polycystic kidney disease protein Tg737 homolog) (Tetratricopeptide repeat protein 10) (TPR repeat protein 10)	HP:0000003	Multicystic kidney dysplasia	36
90410	Q8IY31	IFT20	Intraflagellar transport protein 20 homolog (hIFT20)	HP:0000003	Multicystic kidney dysplasia	37
26063	Q9NUI1	DECR2	Peroxisomal 2,4-dienoyl-CoA reductase [(3E)-enoyl-CoA-producing] (pDCR) (EC 1.3.1.124) (2,4-dienoyl-CoA reductase 2) (Short chain dehydrogenase/reductase family 17C member 1)	HP:0000003	Multicystic kidney dysplasia	38
5193	O00623	PEX12	Peroxisome assembly protein 12 (Peroxin-12) (Peroxisome assembly factor 3) (PAF-3)	HP:0000003	Multicystic kidney dysplasia	39
79848	Q1MSJ5	CSPP1	Centrosome and spindle pole-associated protein 1	HP:0000003	Multicystic kidney dysplasia	40
26123	Q6NUS6	TECT3	Tectonic-3	HP:0000003	Multicystic kidney dysplasia	41
284086	Q86SG6	NEK8	Serine/threonine-protein kinase Nek8 (EC 2.7.11.1) (Never in mitosis A-related kinase 8) (NimA-related protein kinase 8) (Nima-related protein kinase 12a)	HP:0000003	Multicystic kidney dysplasia	42
5192	O60683	PEX10	Peroxisome biogenesis factor 10 (Peroxin-10) (Peroxisomal biogenesis factor 10) (Peroxisome assembly protein 10) (RING finger protein 69)	HP:0000003	Multicystic kidney dysplasia	43
5828	P28328	PEX2	Peroxisome biogenesis factor 2 (35 kDa peroxisomal membrane protein) (Peroxin-2) (Peroxisomal membrane protein 3) (Peroxisome assembly factor 1) (PAF-1) (RING finger protein 72)	HP:0000003	Multicystic kidney dysplasia	44
79809	Q7Z4L5	TT21B	Tetratricopeptide repeat protein 21B (TPR repeat protein 21B) (Intraflagellar transport 139 homolog)	HP:0000003	Multicystic kidney dysplasia	45
9742	Q96RY7	IF140	Intraflagellar transport protein 140 homolog (WD and tetratricopeptide repeats protein 2)	HP:0000003	Multicystic kidney dysplasia	46
5194	Q92968	PEX13	Peroxisomal membrane protein PEX13 (Peroxin-13)	HP:0000003	Multicystic kidney dysplasia	47
51524	Q9NPI0	TM138	Transmembrane protein 138	HP:0000003	Multicystic kidney dysplasia	48
128344	Q8TCI5	PIFO	Protein pitchfork	HP:0000003	Multicystic kidney dysplasia	49
5195	O75381	PEX14	Peroxisomal membrane protein PEX14 (PTS1 receptor-docking protein) (Peroxin-14) (Peroxisomal membrane anchor protein PEX14)	HP:0000003	Multicystic kidney dysplasia	50
219743	Q2T9J0	TYSD1	Peroxisomal leader peptide-processing protease (EC 3.4.21.-) (Trypsin domain-containing protein 1) [Cleaved into: Peroxisomal leader peptide-processing protease, 15 kDa form; Peroxisomal leader peptide-processing protease, 45 kDa form]	HP:0000003	Multicystic kidney dysplasia	51
84314	Q6UX40	TM107	Transmembrane protein 107	HP:0000003	Multicystic kidney dysplasia	52
26005	Q4AC94	C2CD3	C2 domain-containing protein 3	HP:0000003	Multicystic kidney dysplasia	53
153241	Q8N960	CE120	Centrosomal protein of 120 kDa (Cep120) (Coiled-coil domain-containing protein 100)	HP:0000003	Multicystic kidney dysplasia	54
374654	Q2M1P5	KIF7	Kinesin-like protein KIF7	HP:0000003	Multicystic kidney dysplasia	55
10005	O14734	ACOT8	Acyl-coenzyme A thioesterase 8 (Acyl-CoA thioesterase 8) (EC 3.1.2.1) (EC 3.1.2.11) (EC 3.1.2.2) (EC 3.1.2.3) (EC 3.1.2.5) (Choloyl-coenzyme A thioesterase) (EC 3.1.2.27) (HIV-Nef-associated acyl-CoA thioesterase) (Peroxisomal acyl-CoA thioesterase 2) (PTE-2) (Peroxisomal acyl-coenzyme A thioester hydrolase 1) (PTE-1) (Peroxisomal long-chain acyl-CoA thioesterase 1) (Thioesterase II) (hACTE-III) …	HP:0000003	Multicystic kidney dysplasia	56
7289	O75386	TULP3	Tubby-related protein 3 (Tubby-like protein 3)	HP:0000003	Multicystic kidney dysplasia	57
5147	O43924	PDE6D	Retinal rod rhodopsin-sensitive cGMP 3',5'-cyclic phosphodiesterase subunit delta (GMP-PDE delta) (Protein p17)	HP:0000003	Multicystic kidney dysplasia	58
57539	Q9P2L0	WDR35	WD repeat-containing protein 35 (Intraflagellar transport protein 121 homolog)	HP:0000003	Multicystic kidney dysplasia	59
51134	Q9Y592	CEP83	Centrosomal protein of 83 kDa (Cep83) (Coiled-coil domain-containing protein 41) (Renal carcinoma antigen NY-REN-58)	HP:0000003	Multicystic kidney dysplasia	60
55670	Q7Z412	PEX26	Peroxisome assembly protein 26 (Peroxin-26)	HP:0000003	Multicystic kidney dysplasia	61
22897	Q9UPV0	CE164	Centrosomal protein of 164 kDa (Cep164)	HP:0000003	Multicystic kidney dysplasia	62
57560	Q9P2H3	IFT80	Intraflagellar transport protein 80 homolog (WD repeat-containing protein 56)	HP:0000003	Multicystic kidney dysplasia	63
11020	Q9BW83	IFT27	Intraflagellar transport protein 27 homolog (Putative GTP-binding protein RAY-like) (Rab-like protein 4)	HP:0000003	Multicystic kidney dysplasia	64
5825	P28288	ABCD3	ATP-binding cassette sub-family D member 3 (70 kDa peroxisomal membrane protein) (PMP70)	HP:0000003	Multicystic kidney dysplasia	65
55081	Q9NWB7	IFT57	Intraflagellar transport protein 57 homolog (Dermal papilla-derived protein 8) (Estrogen-related receptor beta-like protein 1) (HIP1-interacting protein) (MHS4R2)	HP:0000003	Multicystic kidney dysplasia	66
4750	Q96PY6	NEK1	Serine/threonine-protein kinase Nek1 (EC 2.7.11.1) (Never in mitosis A-related kinase 1) (NimA-related protein kinase 1) (Renal carcinoma antigen NY-REN-55)	HP:0000003	Multicystic kidney dysplasia	67
132884	Q86UK5	LBN	Limbin (Ellis-van Creveld syndrome protein 2) (EVC2)	HP:0000003	Multicystic kidney dysplasia	68
55764	Q9HBG6	IF122	Intraflagellar transport protein 122 homolog (WD repeat-containing protein 10) (WD repeat-containing protein 140)	HP:0000003	Multicystic kidney dysplasia	69
392509	Q5H913	AR13A	ADP-ribosylation factor-like protein 13A	HP:0000003	Multicystic kidney dysplasia	70
219854	A2RU14	TM218	Transmembrane protein 218	HP:0000003	Multicystic kidney dysplasia	71
79989	A0AVF1	IFT56	Intraflagellar transport protein 56 (Tetratricopeptide repeat protein 26) (TPR repeat protein 26)	HP:0000003	Multicystic kidney dysplasia	72
9409	Q9Y5Y5	PEX16	Peroxisomal membrane protein PEX16 (Peroxin-16) (Peroxisomal biogenesis factor 16)	HP:0000003	Multicystic kidney dysplasia	73
5191	O00628	PEX7	Peroxisomal targeting signal 2 receptor (PTS2 receptor) (Peroxin-7)	HP:0000003	Multicystic kidney dysplasia	74
80776	Q9BPU9	B9D2	B9 domain-containing protein 2 (MKS1-related protein 2)	HP:0000003	Multicystic kidney dysplasia	75
6103	Q92834	RPGR	X-linked retinitis pigmentosa GTPase regulator	HP:0000003	Multicystic kidney dysplasia	76
10478	O43808	PM34	Peroxisomal membrane protein PMP34 (34 kDa peroxisomal membrane protein) (Solute carrier family 25 member 17)	HP:0000003	Multicystic kidney dysplasia	77
7840	Q8TCU4	ALMS1	Alstrom syndrome protein 1	HP:0000003	Multicystic kidney dysplasia	78
95681	Q9BYV8	CEP41	Centrosomal protein of 41 kDa (Cep41) (Testis-specific gene A14 protein)	HP:0000003	Multicystic kidney dysplasia	79
26146	Q8TDR0	MIPT3	TRAF3-interacting protein 1 (Interleukin-13 receptor alpha 1-binding protein 1) (Intraflagellar transport protein 54 homolog) (Microtubule-interacting protein associated with TRAF3) (MIP-T3)	HP:0000003	Multicystic kidney dysplasia	80
221322	Q96NH3	BROMI	Protein broad-minded (TBC1 domain family member 32)	HP:0000003	Multicystic kidney dysplasia	81
5824	P40855	PEX19	Peroxisomal biogenesis factor 19 (33 kDa housekeeping protein) (Peroxin-19) (Peroxisomal farnesylated protein)	HP:0000003	Multicystic kidney dysplasia	82
79140	Q9BUN5	CC28B	Coiled-coil domain-containing protein 28B	HP:0000003	Multicystic kidney dysplasia	83
8799	O96011	PX11B	Peroxisomal membrane protein 11B (Peroxin-11B) (Peroxisomal biogenesis factor 11B) (Protein PEX11 homolog beta) (PEX11-beta)	HP:0000003	Multicystic kidney dysplasia	84
27152	Q9ULD6	INTU	Protein inturned (Inturned planar cell polarity effector homolog) (PDZ domain-containing protein 6)	HP:0000003	Multicystic kidney dysplasia	85
83752	Q86WA8	LONP2	Lon protease homolog 2, peroxisomal (EC 3.4.21.53) (Lon protease-like protein 2) (Lon protease 2) (Peroxisomal Lon protease) (pLon)	HP:0000003	Multicystic kidney dysplasia	86
23090	Q2M1K9	ZN423	Zinc finger protein 423 (Olf1/EBF-associated zinc finger protein) (hOAZ) (Smad- and Olf-interacting zinc finger protein)	HP:0000003	Multicystic kidney dysplasia	87
9657	Q15051	IQCB1	IQ calmodulin-binding motif-containing protein 1 (Nephrocystin-5) (p53 and DNA damage-regulated IQ motif protein) (PIQ)	HP:0000003	Multicystic kidney dysplasia	88
79598	Q8IW35	CEP97	Centrosomal protein of 97 kDa (Cep97) (Leucine-rich repeat and IQ domain-containing protein 2)	HP:0000003	Multicystic kidney dysplasia	89
5189	O43933	PEX1	Peroxisome biogenesis factor 1 (Peroxin-1) (Peroxisome biogenesis disorder protein 1)	HP:0000003	Multicystic kidney dysplasia	90
54585	Q9NQ48	LZTL1	Leucine zipper transcription factor-like protein 1	HP:0000003	Multicystic kidney dysplasia	91
346007	Q5T1H1	EYS	Protein eyes shut homolog (Epidermal growth factor-like protein 10) (EGF-like protein 10) (Epidermal growth factor-like protein 11) (EGF-like protein 11) (Protein spacemaker homolog)	HP:0000003	Multicystic kidney dysplasia	92
64792	Q9H7X7	IFT22	Intraflagellar transport protein 22 homolog (Rab-like protein 5)	HP:0000003	Multicystic kidney dysplasia	93
5830	P50542	PEX5	Peroxisomal targeting signal 1 receptor (PTS1 receptor) (PTS1R) (PTS1-BP) (Peroxin-5) (Peroxisomal C-terminal targeting signal import receptor) (Peroxisome receptor 1)	HP:0000003	Multicystic kidney dysplasia	94
79947	Q86SQ9	DHDDS	Dehydrodolichyl diphosphate synthase complex subunit DHDDS (EC 2.5.1.87) (Cis-isoprenyltransferase) (CIT) (Cis-IPTase) (Cis-prenyltransferase subunit hCIT) (Epididymis tissue protein Li 189m)	HP:0000003	Multicystic kidney dysplasia	95
132320	Q96NL6	SCLT1	Sodium channel and clathrin linker 1 (Sodium channel-associated protein 1)	HP:0000003	Multicystic kidney dysplasia	96
55812	Q9P0W8	SPAT7	Spermatogenesis-associated protein 7 (HSD-3.1) (Spermatogenesis-associated protein HSD3)	HP:0000003	Multicystic kidney dysplasia	97
203286	Q68DC2	ANKS6	Ankyrin repeat and SAM domain-containing protein 6 (Ankyrin repeat domain-containing protein 14) (SamCystin) (Sterile alpha motif domain-containing protein 6) (SAM domain-containing protein 6)	HP:0000003	Multicystic kidney dysplasia	98
388939	A6NGG8	PCARE	Photoreceptor cilium actin regulator	HP:0000003	Multicystic kidney dysplasia	99
23418	P82279	CRUM1	Protein crumbs homolog 1	HP:0000003	Multicystic kidney dysplasia	100
79633	Q6V0I7	FAT4	Protocadherin Fat 4 (hFat4) (Cadherin family member 14) (FAT tumor suppressor homolog 4) (Fat-like cadherin protein FAT-J)	HP:0000003	Multicystic kidney dysplasia	101
150737	Q8N4P2	TT30B	Tetratricopeptide repeat protein 30B (TPR repeat protein 30B)	HP:0000003	Multicystic kidney dysplasia	102
282809	Q8TC44	POC1B	POC1 centriolar protein homolog B (Pix1) (Proteome of centriole protein 1B) (WD repeat-containing protein 51B)	HP:0000003	Multicystic kidney dysplasia	103
2121	P57679	EVC	Ellis-van Creveld syndrome protein (DWF-1)	HP:0000003	Multicystic kidney dysplasia	104
91754	Q8TD19	NEK9	Serine/threonine-protein kinase Nek9 (EC 2.7.11.1) (Nercc1 kinase) (Never in mitosis A-related kinase 9) (NimA-related protein kinase 9) (NimA-related kinase 8) (Nek8)	HP:0000003	Multicystic kidney dysplasia	105
57216	Q9ULK5	VANG2	Vang-like protein 2 (Loop-tail protein 1 homolog) (Strabismus 1) (Van Gogh-like protein 2)	HP:0000003	Multicystic kidney dysplasia	106
51555	Q8IYB4	PEX5R	PEX5-related protein (PEX2-related protein) (PEX5-like protein) (Peroxin-5-related protein) (Peroxisome biogenesis factor 5-like) (Tetratricopeptide repeat-containing Rab8b-interacting protein) (Pex5Rp) (TRIP8b)	HP:0000003	Multicystic kidney dysplasia	107
285331	A2RUB6	CCD66	Coiled-coil domain-containing protein 66	HP:0000003	Multicystic kidney dysplasia	108
8800	O75192	PX11A	Peroxisomal membrane protein 11A (HsPEX11p) (28 kDa peroxisomal integral membrane protein) (PMP28) (Peroxin-11A) (Peroxisomal biogenesis factor 11A) (Protein PEX11 homolog alpha) (PEX11-alpha)	HP:0000003	Multicystic kidney dysplasia	109
92960	Q96HA9	PX11C	Peroxisomal membrane protein 11C (Peroxin-11C) (Peroxisomal biogenesis factor 11C) (Protein PEX11 homolog gamma) (PEX11-gamma)	HP:0000003	Multicystic kidney dysplasia	110
57096	Q96KN7	RPGR1	X-linked retinitis pigmentosa GTPase regulator-interacting protein 1 (RPGR-interacting protein 1)	HP:0000003	Multicystic kidney dysplasia	111
8310	O15254	ACOX3	Peroxisomal acyl-coenzyme A oxidase 3 (EC 1.3.3.6) (Branched-chain acyl-CoA oxidase) (BRCACox) (Pristanoyl-CoA oxidase)	HP:0000003	Multicystic kidney dysplasia	112
8504	P56589	PEX3	Peroxisomal biogenesis factor 3 (Peroxin-3) (Peroxisomal assembly protein PEX3)	HP:0000003	Multicystic kidney dysplasia	113
92104	Q86WT1	TT30A	Tetratricopeptide repeat protein 30A (TPR repeat protein 30A)	HP:0000003	Multicystic kidney dysplasia	114
23059	Q96AJ1	CLUA1	Clusterin-associated protein 1 (Qilin)	HP:0000003	Multicystic kidney dysplasia	115
127733	Q96LJ8	UBX10	UBX domain-containing protein 10 (UBX domain-containing protein 3)	HP:0000003	Multicystic kidney dysplasia	116
24	P78363	ABCA4	Retinal-specific phospholipid-transporting ATPase ABCA4 (EC 7.6.2.1) (ATP-binding cassette sub-family A member 4) (RIM ABC transporter) (RIM protein) (RmP) (Retinal-specific ATP-binding cassette transporter) (Stargardt disease protein)	HP:0000003	Multicystic kidney dysplasia	117
7287	O00294	TULP1	Tubby-related protein 1 (Tubby-like protein 1)	HP:0000003	Multicystic kidney dysplasia	118
28981	Q8WYA0	IFT81	Intraflagellar transport protein 81 homolog (Carnitine deficiency-associated protein expressed in ventricle 1) (CDV-1)	HP:0000003	Multicystic kidney dysplasia	119
117177	Q96QF0	RAB3I	Rab-3A-interacting protein (Rab3A-interacting protein) (Rabin-3) (SSX2-interacting protein)	HP:0000003	Multicystic kidney dysplasia	120
199223	Q8NDW8	TT21A	Tetratricopeptide repeat protein 21A (TPR repeat protein 21A) (Stress-inducible protein 2)	HP:0000003	Multicystic kidney dysplasia	121
375298	Q49MI3	CERKL	Ceramide kinase-like protein	HP:0000003	Multicystic kidney dysplasia	122
5190	Q13608	PEX6	Peroxisome assembly factor 2 (PAF-2) (Peroxin-6) (Peroxisomal biogenesis factor 6) (Peroxisomal-type ATPase 1)	HP:0000003	Multicystic kidney dysplasia	123
157657	Q96NL8	CH037	Protein C8orf37	HP:0000003	Multicystic kidney dysplasia	124
80199	Q9BT04	FUZZY	Protein fuzzy homolog	HP:0000003	Multicystic kidney dysplasia	125
225	Q9UBJ2	ABCD2	ATP-binding cassette sub-family D member 2 (Adrenoleukodystrophy-like 1) (Adrenoleukodystrophy-related protein) (hALDR)	HP:0000003	Multicystic kidney dysplasia	126
25776	Q9Y3M2	CBY1	Protein chibby homolog 1 (ARPP-binding protein) (Cytosolic leucine-rich protein) (PIGEA-14) (PKD2 interactor, Golgi and endoplasmic reticulum-associated 1)	HP:0000003	Multicystic kidney dysplasia	127
403	P36405	ARL3	ADP-ribosylation factor-like protein 3	HP:0000003	Multicystic kidney dysplasia	128
2317	O75369	FLNB	Filamin-B (FLN-B) (ABP-278) (ABP-280 homolog) (Actin-binding-like protein) (Beta-filamin) (Filamin homolog 1) (Fh1) (Filamin-3) (Thyroid autoantigen) (Truncated actin-binding protein) (Truncated ABP)	HP:0000003	Multicystic kidney dysplasia	129
8309	Q99424	ACOX2	Peroxisomal acyl-coenzyme A oxidase 2 (EC 1.17.99.3) (3-alpha,7-alpha,12-alpha-trihydroxy-5-beta-cholestanoyl-CoA 24-hydroxylase) (3-alpha,7-alpha,12-alpha-trihydroxy-5-beta-cholestanoyl-CoA oxidase) (Trihydroxycoprostanoyl-CoA oxidase) (THCA-CoA oxidase) (THCCox)	HP:0000003	Multicystic kidney dysplasia	130
4648	Q6PIF6	MYO7B	Unconventional myosin-VIIb	HP:0000003	Multicystic kidney dysplasia	131
51684	Q9UMX1	SUFU	Suppressor of fused homolog (SUFUH)	HP:0000003	Multicystic kidney dysplasia	132
64218	Q9H3S1	SEM4A	Semaphorin-4A (Semaphorin-B) (Sema B)	HP:0000003	Multicystic kidney dysplasia	133
10343	Q9NTG1	PKDRE	Polycystic kidney disease and receptor for egg jelly-related protein (PKD and REJ homolog)	HP:0000003	Multicystic kidney dysplasia	134
145226	Q96NR8	RDH12	Retinol dehydrogenase 12 (EC 1.1.1.300) (All-trans and 9-cis retinol dehydrogenase) (Short chain dehydrogenase/reductase family 7C member 2)	HP:0000003	Multicystic kidney dysplasia	135
22832	Q5TB80	CE162	Centrosomal protein of 162 kDa (Cep162) (Protein QN1 homolog)	HP:0000003	Multicystic kidney dysplasia	136
5991	P48380	RFX3	Transcription factor RFX3 (Regulatory factor X 3)	HP:0000003	Multicystic kidney dysplasia	137
2737	P10071	GLI3	Transcriptional activator GLI3 (GLI3 form of 190 kDa) (GLI3-190) (GLI3 full-length protein) (GLI3FL) [Cleaved into: Transcriptional repressor GLI3R (GLI3 C-terminally truncated form) (GLI3 form of 83 kDa) (GLI3-83)]	HP:0000003	Multicystic kidney dysplasia	138
80144	Q86XX4	FRAS1	Extracellular matrix organizing protein FRAS1 (Fraser syndrome 1 protein)	HP:0000003	Multicystic kidney dysplasia	139
6342	P22307	SCP2	Sterol carrier protein 2 (SCP-2) (Acetyl-CoA C-myristoyltransferase) (EC 2.3.1.155) (Non-specific lipid-transfer protein) (NSL-TP) (Propanoyl-CoA C-acyltransferase) (EC 2.3.1.176) (SCP-2/3-oxoacyl-CoA thiolase) (SCP-2/thiolase) (EC 2.3.1.16) (SCP-chi) (SCPX) (Sterol carrier protein X) (SCP-X) (Straight-chain acyl-CoA oxidase) (SCOX)	HP:0000003	Multicystic kidney dysplasia	140
1891	Q13011	ECH1	Delta(3,5)-Delta(2,4)-dienoyl-CoA isomerase, mitochondrial (EC 5.3.3.-)	HP:0000003	Multicystic kidney dysplasia	141
387707	Q6DHV5	C2D2B	Protein CC2D2B	HP:0000003	Multicystic kidney dysplasia	142
84131	Q5JTW2	CEP78	Centrosomal protein of 78 kDa (Cep78)	HP:0000003	Multicystic kidney dysplasia	143
3295	P51659	DHB4	Peroxisomal multifunctional enzyme type 2 (MFE-2) (17-beta-hydroxysteroid dehydrogenase 4) (17-beta-HSD 4) (D-bifunctional protein) (DBP) (Multifunctional protein 2) (MFP-2) (Short chain dehydrogenase/reductase family 8C member 1) [Cleaved into: (3R)-hydroxyacyl-CoA dehydrogenase (EC 1.1.1.n12); Enoyl-CoA hydratase 2 (EC 4.2.1.107) (EC 4.2.1.119) (3-alpha,7-alpha,12-alpha-trihydroxy-5-beta-choles…	HP:0000003	Multicystic kidney dysplasia	144
11190	Q9BV73	CP250	Centrosome-associated protein CEP250 (250 kDa centrosomal protein) (Cep250) (Centrosomal Nek2-associated protein 1) (C-Nap1) (Centrosomal protein 2)	HP:0000003	Multicystic kidney dysplasia	145
7399	O75445	USH2A	Usherin (Usher syndrome type IIa protein) (Usher syndrome type-2A protein)	HP:0000003	Multicystic kidney dysplasia	146
8642	Q96JQ0	PCD16	Protocadherin-16 (Cadherin-19) (Cadherin-25) (Fibroblast cadherin-1) (Protein dachsous homolog 1)	HP:0000003	Multicystic kidney dysplasia	147
81839	Q8TAA9	VANG1	Vang-like protein 1 (Loop-tail protein 2 homolog) (LPP2) (Strabismus 2) (Van Gogh-like protein 1)	HP:0000003	Multicystic kidney dysplasia	148
84902	Q96ST8	CEP89	Centrosomal protein of 89 kDa (Cep89) (Centrosomal protein 123) (Cep123) (Coiled-coil domain-containing protein 123)	HP:0000003	Multicystic kidney dysplasia	149
26003	Q9H8Y8	GORS2	Golgi reassembly-stacking protein 2 (GRS2) (Golgi phosphoprotein 6) (GOLPH6) (Golgi reassembly-stacking protein of 55 kDa) (GRASP55) (p59)	HP:0000003	Multicystic kidney dysplasia	150
80183	Q9H714	PACER	Protein associated with UVRAG as autophagy enhancer (Pacer) (Protein Rubicon-like)	HP:0000005	Mode of inheritance	1
83902	Q9BYP8	KR171	Keratin-associated protein 17-1 (Keratin-associated protein 16.1)	HP:0000005	Mode of inheritance	2
337967	Q3LI66	KRA62	Keratin-associated protein 6-2	HP:0000005	Mode of inheritance	3
337975	Q3LI63	KR201	Keratin-associated protein 20-1	HP:0000005	Mode of inheritance	4
337979	Q3MIV0	KR221	Keratin-associated protein 22-1	HP:0000005	Mode of inheritance	5
337963	A1A580	KR231	Keratin-associated protein 23-1	HP:0000005	Mode of inheritance	6
100288287	Q3LI68	KR222	Keratin-associated protein 22-2	HP:0000005	Mode of inheritance	7
337985	Q3LI60	KR203	Keratin-associated protein 20-3	HP:0000005	Mode of inheritance	8
100288323	Q3LHN1	KR213	Keratin-associated protein 21-3	HP:0000005	Mode of inheritance	9
100151643	Q3LI62	KR204	Putative keratin-associated protein 20-4	HP:0000005	Mode of inheritance	10
100131902	Q3LHN0	KR251	Keratin-associated protein 25-1	HP:0000005	Mode of inheritance	11
337978	Q3LI59	KR212	Keratin-associated protein 21-2	HP:0000005	Mode of inheritance	12
337968	Q3LI67	KRA63	Keratin-associated protein 6-3	HP:0000005	Mode of inheritance	13
337974	Q3SYF9	KR197	Keratin-associated protein 19-7	HP:0000005	Mode of inheritance	14
57830	O75690	KRA58	Keratin-associated protein 5-8 (Keratin, ultra high-sulfur matrix protein B) (Keratin-associated protein 5.8) (UHS keratin B) (UHS KerB) (Ultrahigh sulfur keratin-associated protein 5.8)	HP:0000005	Mode of inheritance	15
728279	Q9BYT5	KRA22	Keratin-associated protein 2-2 (High sulfur keratin-associated protein 2.2) (Keratin-associated protein 2.2)	HP:0000005	Mode of inheritance	16
440051	Q6L8G4	KR511	Keratin-associated protein 5-11 (Keratin-associated protein 5.11) (Ultrahigh sulfur keratin-associated protein 5.11)	HP:0000005	Mode of inheritance	17
337973	Q3LI70	KR196	Keratin-associated protein 19-6	HP:0000005	Mode of inheritance	18
440050	Q6L8G8	KRA57	Keratin-associated protein 5-7 (Keratin-associated protein 5-3) (Keratin-associated protein 5.3) (Keratin-associated protein 5.7) (Ultrahigh sulfur keratin-associated protein 5.7)	HP:0000005	Mode of inheritance	19
386684	P60329	KR124	Keratin-associated protein 12-4 (High sulfur keratin-associated protein 12.4) (Keratin-associated protein 12.4)	HP:0000005	Mode of inheritance	20
337971	Q3LI73	KR194	Keratin-associated protein 19-4	HP:0000005	Mode of inheritance	21
337970	Q7Z4W3	KR193	Keratin-associated protein 19-3 (GTHRP) (Glycine/tyrosine-rich protein)	HP:0000005	Mode of inheritance	22
728255	P0C5Y4	KRA14	Keratin-associated protein 1-4 (High sulfur keratin-associated protein 1.4) (Keratin-associated protein 1.4)	HP:0000005	Mode of inheritance	23
83900	Q9BYQ3	KRA93	Keratin-associated protein 9-3 (Keratin-associated protein 9.3) (Ultrahigh sulfur keratin-associated protein 9.3)	HP:0000005	Mode of inheritance	24
83901	Q9BYQ0	KRA98	Keratin-associated protein 9-8 (Keratin-associated protein 9.8) (Ultrahigh sulfur keratin-associated protein 9.8)	HP:0000005	Mode of inheritance	25
353332	P59990	KR121	Keratin-associated protein 12-1 (High sulfur keratin-associated protein 12.1) (Keratin-associated protein 12.1)	HP:0000005	Mode of inheritance	26
337966	Q3LI64	KRA61	Keratin-associated protein 6-1	HP:0000005	Mode of inheritance	27
728299	Q3LI54	KR198	Keratin-associated protein 19-8	HP:0000005	Mode of inheritance	28
337976	Q3LI61	KR202	Keratin-associated protein 20-2	HP:0000005	Mode of inheritance	29
83897	Q9BYR7	KRA32	Keratin-associated protein 3-2 (High sulfur keratin-associated protein 3.2) (Keratin-associated protein 3.2)	HP:0000005	Mode of inheritance	30
337878	Q8IUC3	KRA71	Keratin-associated protein 7-1 (High tyrosine-glycine keratin-associated protein 7.1)	HP:0000005	Mode of inheritance	31
386683	P60328	KR123	Keratin-associated protein 12-3 (High sulfur keratin-associated protein 12.3) (Keratin-associated protein 12.3)	HP:0000005	Mode of inheritance	32
387273	Q6L8G5	KR510	Keratin-associated protein 5-10 (Keratin-associated protein 5.10) (Ultrahigh sulfur keratin-associated protein 5.10)	HP:0000005	Mode of inheritance	33
337960	Q3SY46	KR133	Keratin-associated protein 13-3	HP:0000005	Mode of inheritance	34
440021	Q701N4	KRA52	Keratin-associated protein 5-2 (Keratin-associated protein 5-8) (Keratin-associated protein 5.2) (Keratin-associated protein 5.8) (Ultrahigh sulfur keratin-associated protein 5.2)	HP:0000005	Mode of inheritance	35
85280	Q9BYQ2	KRA94	Keratin-associated protein 9-4 (Keratin-associated protein 9.4) (Ultrahigh sulfur keratin-associated protein 9.4)	HP:0000005	Mode of inheritance	36
8687	O76015	KRT38	Keratin, type I cuticular Ha8 (Hair keratin, type I Ha8) (Keratin-38) (K38)	HP:0000005	Mode of inheritance	37
337882	Q8IUB9	KR191	Keratin-associated protein 19-1 (High tyrosine-glycine keratin-associated protein 19.1)	HP:0000005	Mode of inheritance	38
337977	Q3LI58	KR211	Keratin-associated protein 21-1	HP:0000005	Mode of inheritance	39
337959	Q52LG2	KR132	Keratin-associated protein 13-2	HP:0000005	Mode of inheritance	40
337972	Q3LI72	KR195	Keratin-associated protein 19-5	HP:0000005	Mode of inheritance	41
254950	Q3LI76	KR151	Keratin-associated protein 15-1	HP:0000005	Mode of inheritance	42
643812	Q3LI81	KR271	Keratin-associated protein 27-1	HP:0000005	Mode of inheritance	43
643803	Q3LI83	KR241	Keratin-associated protein 24-1	HP:0000005	Mode of inheritance	44
81872	Q9BYU5	KRA21	Keratin-associated protein 2-1 (High sulfur keratin-associated protein 2.1) (Keratin-associated protein 2.1)	HP:0000005	Mode of inheritance	45
100533177	A8MX34	KR291	Keratin-associated protein 29-1 (Keratin-associated protein 29.2)	HP:0000005	Mode of inheritance	46
84616	Q9BYR3	KRA44	Keratin-associated protein 4-4 (Keratin-associated protein 4-13) (Keratin-associated protein 4.13) (Keratin-associated protein 4.4) (Ultrahigh sulfur keratin-associated protein 4.13) (Ultrahigh sulfur keratin-associated protein 4.4)	HP:0000005	Mode of inheritance	47
3846	P26371	KRA59	Keratin-associated protein 5-9 (Keratin, cuticle, ultrahigh sulfur 1) (Keratin, ultra high-sulfur matrix protein A) (Keratin-associated protein 5.9) (UHS keratin A) (UHS KerA) (Ultrahigh sulfur keratin-associated protein 5.9)	HP:0000005	Mode of inheritance	48
51350	Q01546	K22O	Keratin, type II cytoskeletal 2 oral (Cytokeratin-2P) (CK-2P) (K2P) (Keratin-76) (K76) (Type-II keratin Kb9)	HP:0000005	Mode of inheritance	49
284827	Q3LI77	KR134	Keratin-associated protein 13-4	HP:0000005	Mode of inheritance	50
140258	Q8IUC0	KR131	Keratin-associated protein 13-1 (High sulfur keratin-associated protein 13.1)	HP:0000005	Mode of inheritance	51
386676	P60411	KR109	Keratin-associated protein 10-9 (High sulfur keratin-associated protein 10.9) (Keratin-associated protein 10.9) (Keratin-associated protein 18-9) (Keratin-associated protein 18.9)	HP:0000005	Mode of inheritance	52
56951	Q8NC54	KCT2	Keratinocyte-associated transmembrane protein 2	HP:0000005	Mode of inheritance	53
83896	Q9BYR8	KRA31	Keratin-associated protein 3-1 (High sulfur keratin-associated protein 3.1) (Keratin-associated protein 3.1)	HP:0000005	Mode of inheritance	54
100507608	A8MVA2	KRA96	Keratin-associated protein 9-6 (Keratin-associated protein 9-like 2)	HP:0000005	Mode of inheritance	55
3883	O76009	KT33A	Keratin, type I cuticular Ha3-I (Hair keratin, type I Ha3-I) (Keratin-33A) (K33A)	HP:0000005	Mode of inheritance	56
100505724	A8MTY7	KRA97	Keratin-associated protein 9-7 (Keratin-associated protein 9-like 1)	HP:0000005	Mode of inheritance	57
386685	P60413	KR10C	Keratin-associated protein 10-12 (High sulfur keratin-associated protein 10.12) (Keratin-associated protein 10.12) (Keratin-associated protein 18-12) (Keratin-associated protein 18.12)	HP:0000005	Mode of inheritance	58
390792	Q6A163	K1C39	Keratin, type I cytoskeletal 39 (Cytokeratin-39) (CK-39) (Keratin-39) (K39) (Type I hair keratin Ka35)	HP:0000005	Mode of inheritance	59
388818	Q6PEX3	KR261	Keratin-associated protein 26-1	HP:0000005	Mode of inheritance	60
386682	P60369	KR103	Keratin-associated protein 10-3 (High sulfur keratin-associated protein 10.3) (Keratin-associated protein 10.3) (Keratin-associated protein 18-3) (Keratin-associated protein 18.3)	HP:0000005	Mode of inheritance	61
337879	Q8IUC2	KRA81	Keratin-associated protein 8-1 (High glycine-tyrosine keratin-associated protein 8.1)	HP:0000005	Mode of inheritance	62
386672	P60372	KR104	Keratin-associated protein 10-4 (High sulfur keratin-associated protein 10.4) (Keratin-associated protein 10.4) (Keratin-associated protein 18-4) (Keratin-associated protein 18.4)	HP:0000005	Mode of inheritance	63
353323	P59991	KR122	Keratin-associated protein 12-2 (High sulfur keratin-associated protein 12.2) (Keratin-associated protein 12.2)	HP:0000005	Mode of inheritance	64
85291	Q9BYR5	KRA42	Keratin-associated protein 4-2 (Keratin-associated protein 4.2) (Ultrahigh sulfur keratin-associated protein 4.2)	HP:0000005	Mode of inheritance	65
121391	Q7RTS7	K2C74	Keratin, type II cytoskeletal 74 (Cytokeratin-74) (CK-74) (Keratin-5c) (K5C) (Keratin-74) (K74) (Type II inner root sheath-specific keratin-K6irs4) (Type-II keratin Kb37)	HP:0000005	Mode of inheritance	66
386674	P60371	KR106	Keratin-associated protein 10-6 (High sulfur keratin-associated protein 10.6) (Keratin-associated protein 10.6) (Keratin-associated protein 18-6) (Keratin-associated protein 18.6)	HP:0000005	Mode of inheritance	67
730755	P0C7H8	KRA23	Keratin-associated protein 2-3 (High sulfur keratin-associated protein 2.4) (Keratin-associated protein 2.3)	HP:0000005	Mode of inheritance	68
386679	P60368	KR102	Keratin-associated protein 10-2 (High sulfur keratin-associated protein 10.2) (Keratin-associated protein 10.2) (Keratin-associated protein 18-2) (Keratin-associated protein 18.2)	HP:0000005	Mode of inheritance	69
386681	P60410	KR108	Keratin-associated protein 10-8 (High sulfur keratin-associated protein 10.8) (Keratin-associated protein 10.8) (Keratin-associated protein 18-8) (Keratin-associated protein 18.8)	HP:0000005	Mode of inheritance	70
286887	P48668	K2C6C	Keratin, type II cytoskeletal 6C (Cytokeratin-6C) (CK-6C) (Cytokeratin-6E) (CK-6E) (Keratin K6h) (Keratin-6C) (K6C) (Type-II keratin Kb12)	HP:0000005	Mode of inheritance	71
85285	Q9BYQ7	KRA41	Keratin-associated protein 4-1 (Keratin-associated protein 4-10) (Keratin-associated protein 4.1) (Keratin-associated protein 4.10) (Ultrahigh sulfur keratin-associated protein 4.10)	HP:0000005	Mode of inheritance	72
83755	Q9BQ66	KR412	Keratin-associated protein 4-12 (Keratin-associated protein 4.12) (Ultrahigh sulfur keratin-associated protein 4.12)	HP:0000005	Mode of inheritance	73
147183	Q7Z3Z0	K1C25	Keratin, type I cytoskeletal 25 (Cytokeratin-25) (CK-25) (Keratin-25) (K25) (Keratin-25A) (K25A) (Type I inner root sheath-specific keratin-K25irs1)	HP:0000005	Mode of inheritance	74
85289	Q9BYR2	KRA45	Keratin-associated protein 4-5 (Keratin-associated protein 4.5) (Ultrahigh sulfur keratin-associated protein 4.5)	HP:0000005	Mode of inheritance	75
3888	Q9NSB4	KRT82	Keratin, type II cuticular Hb2 (Keratin-82) (K82) (Type II hair keratin Hb2) (Type-II keratin Kb22)	HP:0000005	Mode of inheritance	76
386680	P60370	KR105	Keratin-associated protein 10-5 (High sulfur keratin-associated protein 10.5) (Keratin-associated protein 10.5) (Keratin-associated protein 18-5) (Keratin-associated protein 18.5)	HP:0000005	Mode of inheritance	77
386678	P60412	KR10B	Keratin-associated protein 10-11 (High sulfur keratin-associated protein 10.11) (Keratin-associated protein 10.11) (Keratin-associated protein 18-11) (Keratin-associated protein 18.11)	HP:0000005	Mode of inheritance	78
81871	Q9BYQ5	KRA46	Keratin-associated protein 4-6 (Keratin-associated protein 4-15) (Keratin-associated protein 4.15) (Keratin-associated protein 4.6) (Ultrahigh sulfur keratin-associated protein 4.15)	HP:0000005	Mode of inheritance	79
338785	Q5XKE5	K2C79	Keratin, type II cytoskeletal 79 (Cytokeratin-79) (CK-79) (Keratin-6-like) (Keratin-6L) (Keratin-79) (K79) (Type-II keratin Kb38)	HP:0000005	Mode of inheritance	80
448834	Q5T749	KPRP	Keratinocyte proline-rich protein (hKPRP)	HP:0000005	Mode of inheritance	81
319101	Q86Y46	K2C73	Keratin, type II cytoskeletal 73 (Cytokeratin-73) (CK-73) (Keratin-73) (K73) (Type II inner root sheath-specific keratin-K6irs3) (Type-II keratin Kb36)	HP:0000005	Mode of inheritance	82
105375355	Q9BT76	UPK3B	Uroplakin-3b (UP3b) (Uroplakin IIIb) (UPIIIb) (p35)	HP:0000005	Mode of inheritance	83
728318	A8MXZ3	KRA91	Keratin-associated protein 9-1 (Keratin-associated protein 9-like 3)	HP:0000005	Mode of inheritance	84
100505753	A8MUX0	KR161	Keratin-associated protein 16-1	HP:0000005	Mode of inheritance	85
337880	Q8IUC1	KR111	Keratin-associated protein 11-1 (High sulfur keratin-associated protein 11.1)	HP:0000005	Mode of inheritance	86
386677	P60331	KR101	Keratin-associated protein 10-1 (High sulfur keratin-associated protein 10.1) (Keratin-associated protein 10.1) (Keratin-associated protein 18-1) (Keratin-associated protein 18.1)	HP:0000005	Mode of inheritance	87
200634	Q53RY4	KCP3	Keratinocyte-associated protein 3 (KCP-3)	HP:0000005	Mode of inheritance	88
196374	Q8N1N4	K2C78	Keratin, type II cytoskeletal 78 (Cytokeratin-78) (CK-78) (Keratin-5b) (Keratin-78) (K78) (Type-II keratin Kb40)	HP:0000005	Mode of inheritance	89
342574	Q7Z3Y8	K1C27	Keratin, type I cytoskeletal 27 (Cytokeratin-27) (CK-27) (Keratin-25C) (K25C) (Keratin-27) (K27) (Type I inner root sheath-specific keratin-K25irs3)	HP:0000005	Mode of inheritance	90
3891	P78386	KRT85	Keratin, type II cuticular Hb5 (Hair keratin K2.12) (Keratin-85) (K85) (Type II hair keratin Hb5) (Type-II keratin Kb25)	HP:0000005	Mode of inheritance	91
728224	Q9BYQ9	KRA48	Keratin-associated protein 4-8 (Keratin-associated protein 4.8) (Ultrahigh sulfur keratin-associated protein 4.8)	HP:0000005	Mode of inheritance	92
353288	Q7Z3Y9	K1C26	Keratin, type I cytoskeletal 26 (Cytokeratin-26) (CK-26) (Keratin-25B) (K25B) (Keratin-26) (K26) (Type I inner root sheath-specific keratin-K25irs2)	HP:0000005	Mode of inheritance	93
388533	P60985	KTDAP	Keratinocyte differentiation-associated protein	HP:0000005	Mode of inheritance	94
192666	Q2M2I5	K1C24	Keratin, type I cytoskeletal 24 (Cytokeratin-24) (CK-24) (Keratin-24) (K24) (Type I keratin-24)	HP:0000005	Mode of inheritance	95
85290	Q9BYR4	KRA43	Keratin-associated protein 4-3 (Keratin-associated protein 4.3) (Ultrahigh sulfur keratin-associated protein 4.3)	HP:0000005	Mode of inheritance	96
100132386	Q9BYQ8	KRA49	Keratin-associated protein 4-9 (Keratin-associated protein 4.9) (Ultrahigh sulfur keratin-associated protein 4.9)	HP:0000005	Mode of inheritance	97
653240	Q9BYQ6	KR411	Keratin-associated protein 4-11 (Keratin-associated protein 4-14) (Keratin-associated protein 4.11) (Keratin-associated protein 4.14) (Ultrahigh sulfur keratin-associated protein 4.14)	HP:0000005	Mode of inheritance	98
200185	Q8N6L1	KTAP2	Keratinocyte-associated protein 2 (KCP-2) (Dolichyl-diphosphooligosaccharide--protein glycosyltransferase subunit KCP2) (Oligosaccharyl transferase subunit KCP2)	HP:0000005	Mode of inheritance	99
645027	A8MZ36	EVPLL	Envoplakin-like protein	HP:0000005	Mode of inheritance	100
374454	Q7Z794	K2C1B	Keratin, type II cytoskeletal 1b (Cytokeratin-1B) (CK-1B) (Keratin-77) (K77) (Type-II keratin Kb39)	HP:0000005	Mode of inheritance	101
144501	Q6KB66	K2C80	Keratin, type II cytoskeletal 80 (Cytokeratin-80) (CK-80) (Keratin-80) (K80) (Type-II keratin Kb20)	HP:0000005	Mode of inheritance	102
56169	Q9BYG8	GSDMC	Gasdermin-C (Melanoma-derived leucine zipper-containing extranuclear factor) [Cleaved into: Gasdermin-C, N-terminal (GSDMC-NT); Gasdermin-C, C-terminal (GSDMC-CT)]	HP:0000005	Mode of inheritance	103
388939	A6NGG8	PCARE	Photoreceptor cilium actin regulator	HP:0000005	Mode of inheritance	104
125115	Q6A162	K1C40	Keratin, type I cytoskeletal 40 (Cytokeratin-40) (CK-40) (Keratin-40) (K40) (Type I hair keratin Ka36)	HP:0000005	Mode of inheritance	105
6094	Q03395	ROM1	Rod outer segment membrane protein 1 (ROSP1) (Tetraspanin-23) (Tspan-23)	HP:0000005	Mode of inheritance	106
100287404	D6RCP7	U17LJ	Ubiquitin carboxyl-terminal hydrolase 17-like protein 19 (EC 3.4.19.12)	HP:0000005	Mode of inheritance	107
100287441	D6RJB6	U17LK	Ubiquitin carboxyl-terminal hydrolase 17-like protein 20 (EC 3.4.19.12)	HP:0000005	Mode of inheritance	108
100287144	C9JJH3	U17LA	Ubiquitin carboxyl-terminal hydrolase 17-like protein 10 (EC 3.4.19.12)	HP:0000005	Mode of inheritance	109
100287478	D6R901	U17LL	Ubiquitin carboxyl-terminal hydrolase 17-like protein 21 (EC 3.4.19.12)	HP:0000005	Mode of inheritance	110
100288520	C9J2P7	U17LF	Ubiquitin carboxyl-terminal hydrolase 17-like protein 15 (EC 3.4.19.12)	HP:0000005	Mode of inheritance	111
145226	Q96NR8	RDH12	Retinol dehydrogenase 12 (EC 1.1.1.300) (All-trans and 9-cis retinol dehydrogenase) (Short chain dehydrogenase/reductase family 7C member 2)	HP:0000005	Mode of inheritance	112
6121	Q16518	RPE65	Retinoid isomerohydrolase (EC 3.1.1.64) (All-trans-retinyl-palmitate hydrolase) (Lutein isomerase) (Meso-zeaxanthin isomerase) (EC 5.3.3.22) (Retinal pigment epithelium-specific 65 kDa protein) (Retinol isomerase)	HP:0000005	Mode of inheritance	113
100287238	C9JLJ4	U17LD	Ubiquitin carboxyl-terminal hydrolase 17-like protein 13 (EC 3.4.19.12)	HP:0000005	Mode of inheritance	114
100287205	C9JPN9	UL17C	Ubiquitin carboxyl-terminal hydrolase 17-like protein 12 (EC 3.4.19.12)	HP:0000005	Mode of inheritance	115
7401	P58418	CLRN1	Clarin-1 (Usher syndrome type-3 protein)	HP:0000005	Mode of inheritance	116
157657	Q96NL8	CH037	Protein C8orf37	HP:0000005	Mode of inheritance	117
81851	Q07627	KRA11	Keratin-associated protein 1-1 (High sulfur keratin-associated protein 1.1) (Keratin-associated protein 1.1) (Keratin-associated protein 1.6) (Keratin-associated protein 1.7)	HP:0000005	Mode of inheritance	118
130557	Q8N8E2	ZN513	Zinc finger protein 513	HP:0000005	Mode of inheritance	119
125113	Q8N1A0	KT222	Keratin-like protein KRT222 (Keratin-222) (Keratin-222 pseudogene)	HP:0000005	Mode of inheritance	120
645836	A6NCW0	U17L3	Ubiquitin carboxyl-terminal hydrolase 17-like protein 3 (EC 3.4.19.12) (Deubiquitinating enzyme 17-like protein 3) (Ubiquitin thioesterase 17-like protein 3) (Ubiquitin-specific-processing protease 17-like protein 3)	HP:0000005	Mode of inheritance	121
7287	O00294	TULP1	Tubby-related protein 1 (Tubby-like protein 1)	HP:0000005	Mode of inheritance	122
5961	P23942	PRPH2	Peripherin-2 (Retinal degeneration slow protein) (Tetraspanin-22) (Tspan-22)	HP:0000005	Mode of inheritance	123
768206	Q00LT1	PRCD	Photoreceptor disk component PRCD (Progressive rod-cone degeneration protein)	HP:0000005	Mode of inheritance	124
50939	Q9BZV3	IMPG2	Interphotoreceptor matrix proteoglycan 2 (Interphotoreceptor matrix proteoglycan of 200 kDa) (IPM 200) (Sialoprotein associated with cones and rods proteoglycan) (Spacrcan)	HP:0000005	Mode of inheritance	125
100287513	D6RA61	U17LM	Ubiquitin carboxyl-terminal hydrolase 17-like protein 22 (EC 3.4.19.12)	HP:0000005	Mode of inheritance	126
113146	Q8IVF2	AHNK2	Protein AHNAK2	HP:0000005	Mode of inheritance	127
375298	Q49MI3	CERKL	Ceramide kinase-like protein	HP:0000005	Mode of inheritance	128
140807	Q14CN4	K2C72	Keratin, type II cytoskeletal 72 (Cytokeratin-72) (CK-72) (Keratin-72) (K72) (Type II inner root sheath-specific keratin-K6irs2) (Type-II keratin Kb35)	HP:0000005	Mode of inheritance	129
392188	P0C7I0	U17L8	Inactive ubiquitin carboxyl-terminal hydrolase 17-like protein 8	HP:0000005	Mode of inheritance	130
346007	Q5T1H1	EYS	Protein eyes shut homolog (Epidermal growth factor-like protein 10) (EGF-like protein 10) (Epidermal growth factor-like protein 11) (EGF-like protein 11) (Protein spacemaker homolog)	HP:0000005	Mode of inheritance	131
9227	O95237	LRAT	Lecithin retinol acyltransferase (EC 2.3.1.135) (Phosphatidylcholine--retinol O-acyltransferase)	HP:0000005	Mode of inheritance	132
4901	P54845	NRL	Neural retina-specific leucine zipper protein (NRL)	HP:0000005	Mode of inheritance	133
6017	P12271	RLBP1	Retinaldehyde-binding protein 1 (Cellular retinaldehyde-binding protein)	HP:0000005	Mode of inheritance	134
728386	A8MUK1	U17L5	Ubiquitin carboxyl-terminal hydrolase 17-like protein 5 (EC 3.4.19.12) (Deubiquitinating enzyme 17-like protein 5) (Ubiquitin thioesterase 17-like protein 5) (Ubiquitin-specific-processing protease 17-like protein 5)	HP:0000005	Mode of inheritance	135
1259	P29973	CNGA1	cGMP-gated cation channel alpha-1 (Cyclic nucleotide-gated cation channel 1) (Cyclic nucleotide-gated channel alpha-1) (CNG channel alpha-1) (CNG-1) (CNG1) (Cyclic nucleotide-gated channel, photoreceptor) (Rod photoreceptor cGMP-gated channel subunit alpha)	HP:0000005	Mode of inheritance	136
23746	Q9NZN9	AIPL1	Aryl-hydrocarbon-interacting protein-like 1	HP:0000005	Mode of inheritance	137
100287327	D6RBQ6	U17LH	Ubiquitin carboxyl-terminal hydrolase 17-like protein 17 (EC 3.4.19.12)	HP:0000005	Mode of inheritance	138
1406	O43186	CRX	Cone-rod homeobox protein	HP:0000005	Mode of inheritance	139
3887	Q14533	KRT81	Keratin, type II cuticular Hb1 (Hair keratin K2.9) (Keratin, hair, basic, 1) (Keratin-81) (K81) (Metastatic lymph node 137 gene protein) (MLN 137) (Type II hair keratin Hb1) (Type-II keratin Kb21) (ghHKb1) (ghHb1)	HP:0000005	Mode of inheritance	140
11045	O00322	UPK1A	Uroplakin-1a (UP1a) (Tetraspanin-21) (Tspan-21) (Uroplakin Ia) (UPIa) (UPKa)	HP:0000005	Mode of inheritance	141
55812	Q9P0W8	SPAT7	Spermatogenesis-associated protein 7 (HSD-3.1) (Spermatogenesis-associated protein HSD3)	HP:0000005	Mode of inheritance	142
100287178	C9JVI0	U17LB	Ubiquitin carboxyl-terminal hydrolase 17-like protein 11 (EC 3.4.19.12)	HP:0000005	Mode of inheritance	143
100287364	D6R9N7	U17LI	Ubiquitin carboxyl-terminal hydrolase 17-like protein 18 (EC 3.4.19.12)	HP:0000005	Mode of inheritance	144
387266	Q6L8H2	KRA53	Keratin-associated protein 5-3 (Keratin-associated protein 5-9) (Keratin-associated protein 5.3) (Keratin-associated protein 5.9) (UHS KerB-like) (Ultrahigh sulfur keratin-associated protein 5.3)	HP:0000005	Mode of inheritance	145
24	P78363	ABCA4	Retinal-specific phospholipid-transporting ATPase ABCA4 (EC 7.6.2.1) (ATP-binding cassette sub-family A member 4) (RIM ABC transporter) (RIM protein) (RmP) (Retinal-specific ATP-binding cassette transporter) (Stargardt disease protein)	HP:0000005	Mode of inheritance	146
284110	Q96QA5	GSDMA	Gasdermin-A (Gasdermin-1) [Cleaved into: Gasdermin-A, N-terminal (GSDMA-NT); Gasdermin-A, C-terminal (GSDMA-CT)]	HP:0000005	Mode of inheritance	147
10002	Q9Y5X4	NR2E3	Photoreceptor-specific nuclear receptor (Nuclear receptor subfamily 2 group E member 3) (Retina-specific nuclear receptor)	HP:0000005	Mode of inheritance	148
92211	Q96JP9	CDHR1	Cadherin-related family member 1 (Photoreceptor cadherin) (prCAD) (Protocadherin-21)	HP:0000005	Mode of inheritance	149
94137	Q8IWN7	RP1L1	Retinitis pigmentosa 1-like 1 protein	HP:0000005	Mode of inheritance	150
7273	Q8WZ42	TITIN	Titin (EC 2.7.11.1) (Connectin) (Rhabdomyosarcoma antigen MU-RMS-40.14)	HP:0000006	Autosomal dominant inheritance	1
207	P31749	AKT1	RAC-alpha serine/threonine-protein kinase (EC 2.7.11.1) (Protein kinase B) (PKB) (Protein kinase B alpha) (PKB alpha) (Proto-oncogene c-Akt) (RAC-PK-alpha)	HP:0000006	Autosomal dominant inheritance	2
1499	P35222	CTNB1	Catenin beta-1 (Beta-catenin)	HP:0000006	Autosomal dominant inheritance	3
4851	P46531	NOTC1	Neurogenic locus notch homolog protein 1 (Notch 1) (hN1) (Translocation-associated notch protein TAN-1) [Cleaved into: Notch 1 extracellular truncation (NEXT); Notch 1 intracellular domain (NICD)]	HP:0000006	Autosomal dominant inheritance	4
7157	P04637	P53	Cellular tumor antigen p53 (Antigen NY-CO-13) (Phosphoprotein p53) (Tumor suppressor p53)	HP:0000006	Autosomal dominant inheritance	5
4609	P01106	MYC	Myc proto-oncogene protein (Class E basic helix-loop-helix protein 39) (bHLHe39) (Proto-oncogene c-Myc) (Transcription factor p64)	HP:0000006	Autosomal dominant inheritance	6
2033	Q09472	EP300	Histone acetyltransferase p300 (p300 HAT) (EC 2.3.1.48) (E1A-associated protein p300) (Histone butyryltransferase p300) (EC 2.3.1.-) (Histone crotonyltransferase p300) (EC 2.3.1.-) (Protein 2-hydroxyisobutyryltransferase p300) (EC 2.3.1.-) (Protein lactyltransferas p300) (EC 2.3.1.-) (Protein propionyltransferase p300) (EC 2.3.1.-)	HP:0000006	Autosomal dominant inheritance	7
2597	P04406	G3P	Glyceraldehyde-3-phosphate dehydrogenase (GAPDH) (EC 1.2.1.12) (Peptidyl-cysteine S-nitrosylase GAPDH) (EC 2.6.99.-)	HP:0000006	Autosomal dominant inheritance	8
60	P60709	ACTB	Actin, cytoplasmic 1 (Beta-actin) [Cleaved into: Actin, cytoplasmic 1, N-terminally processed]	HP:0000006	Autosomal dominant inheritance	9
1387	Q92793	CBP	CREB-binding protein (Histone lysine acetyltransferase CREBBP) (EC 2.3.1.48) (Protein-lysine acetyltransferase CREBBP) (EC 2.3.1.-)	HP:0000006	Autosomal dominant inheritance	10
3065	Q13547	HDAC1	Histone deacetylase 1 (HD1) (EC 3.5.1.98)	HP:0000006	Autosomal dominant inheritance	11
4624	P13533	MYH6	Myosin-6 (Myosin heavy chain 6) (Myosin heavy chain, cardiac muscle alpha isoform) (MyHC-alpha)	HP:0000006	Autosomal dominant inheritance	12
3265	P01112	RASH	GTPase HRas (EC 3.6.5.2) (H-Ras-1) (Ha-Ras) (Transforming protein p21) (c-H-ras) (p21ras) [Cleaved into: GTPase HRas, N-terminally processed]	HP:0000006	Autosomal dominant inheritance	13
5728	P60484	PTEN	Phosphatidylinositol 3,4,5-trisphosphate 3-phosphatase and dual-specificity protein phosphatase PTEN (EC 3.1.3.16) (EC 3.1.3.48) (EC 3.1.3.67) (Mutated in multiple advanced cancers 1) (Phosphatase and tensin homolog)	HP:0000006	Autosomal dominant inheritance	14
4625	P12883	MYH7	Myosin-7 (Myosin heavy chain 7) (Myosin heavy chain slow isoform) (MyHC-slow) (Myosin heavy chain, cardiac muscle beta isoform) (MyHC-beta)	HP:0000006	Autosomal dominant inheritance	15
1956	P00533	EGFR	Epidermal growth factor receptor (EC 2.7.10.1) (Proto-oncogene c-ErbB-1) (Receptor tyrosine-protein kinase erbB-1)	HP:0000006	Autosomal dominant inheritance	16
595	P24385	CCND1	G1/S-specific cyclin-D1 (B-cell lymphoma 1 protein) (BCL-1) (BCL-1 oncogene) (PRAD1 oncogene)	HP:0000006	Autosomal dominant inheritance	17
5595	P27361	MK03	Mitogen-activated protein kinase 3 (MAP kinase 3) (MAPK 3) (EC 2.7.11.24) (ERT2) (Extracellular signal-regulated kinase 1) (ERK-1) (Insulin-stimulated MAP2 kinase) (MAP kinase isoform p44) (p44-MAPK) (Microtubule-associated protein 2 kinase) (p44-ERK1)	HP:0000006	Autosomal dominant inheritance	18
6326	Q99250	SCN2A	Sodium channel protein type 2 subunit alpha (HBSC II) (Sodium channel protein brain II subunit alpha) (Sodium channel protein type II subunit alpha) (Voltage-gated sodium channel subunit alpha Nav1.2)	HP:0000006	Autosomal dominant inheritance	19
6657	P48431	SOX2	Transcription factor SOX-2	HP:0000006	Autosomal dominant inheritance	20
652	P12644	BMP4	Bone morphogenetic protein 4 (BMP-4) (Bone morphogenetic protein 2B) (BMP-2B)	HP:0000006	Autosomal dominant inheritance	21
4654	P15172	MYOD1	Myoblast determination protein 1 (Class C basic helix-loop-helix protein 1) (bHLHc1) (Myogenic factor 3) (Myf-3)	HP:0000006	Autosomal dominant inheritance	22
845	O14958	CASQ2	Calsequestrin-2 (Calsequestrin, cardiac muscle isoform)	HP:0000006	Autosomal dominant inheritance	23
3725	P05412	JUN	Transcription factor AP-1 (Activator protein 1) (AP1) (Proto-oncogene c-Jun) (V-jun avian sarcoma virus 17 oncogene homolog) (p39)	HP:0000006	Autosomal dominant inheritance	24
3785	O43526	KCNQ2	Potassium voltage-gated channel subfamily KQT member 2 (KQT-like 2) (Neuroblastoma-specific potassium channel subunit alpha KvLQT2) (Voltage-gated potassium channel subunit Kv7.2)	HP:0000006	Autosomal dominant inheritance	25
3845	P01116	RASK	GTPase KRas (EC 3.6.5.2) (K-Ras 2) (Ki-Ras) (c-K-ras) (c-Ki-ras) [Cleaved into: GTPase KRas, N-terminally processed]	HP:0000006	Autosomal dominant inheritance	26
4208	Q06413	MEF2C	Myocyte-specific enhancer factor 2C (Myocyte enhancer factor 2C)	HP:0000006	Autosomal dominant inheritance	27
2902	Q05586	NMDZ1	Glutamate receptor ionotropic, NMDA 1 (GluN1) (Glutamate [NMDA] receptor subunit zeta-1) (N-methyl-D-aspartate receptor subunit NR1) (NMD-R1)	HP:0000006	Autosomal dominant inheritance	28
2186	Q12830	BPTF	Nucleosome-remodeling factor subunit BPTF (Bromodomain and PHD finger-containing transcription factor) (Fetal Alz-50 clone 1 protein) (Fetal Alzheimer antigen)	HP:0000006	Autosomal dominant inheritance	29
4297	Q03164	KMT2A	Histone-lysine N-methyltransferase 2A (Lysine N-methyltransferase 2A) (EC 2.1.1.354) (ALL-1) (CXXC-type zinc finger protein 7) (Myeloid/lymphoid or mixed-lineage leukemia) (Myeloid/lymphoid or mixed-lineage leukemia protein 1) (Trithorax-like protein) (Zinc finger protein HRX) [Cleaved into: MLL cleavage product N320 (N-terminal cleavage product of 320 kDa) (p320); MLL cleavage product C180 (C-te…	HP:0000006	Autosomal dominant inheritance	30
3736	Q09470	KCNA1	Potassium voltage-gated channel subfamily A member 1 (Voltage-gated K(+) channel HuKI) (Voltage-gated potassium channel HBK1) (Voltage-gated potassium channel subunit Kv1.1)	HP:0000006	Autosomal dominant inheritance	31
4089	Q13485	SMAD4	Mothers against decapentaplegic homolog 4 (MAD homolog 4) (Mothers against DPP homolog 4) (Deletion target in pancreatic carcinoma 4) (SMAD family member 4) (SMAD 4) (Smad4) (hSMAD4)	HP:0000006	Autosomal dominant inheritance	32
367	P10275	ANDR	Androgen receptor (Dihydrotestosterone receptor) (Nuclear receptor subfamily 3 group C member 4)	HP:0000006	Autosomal dominant inheritance	33
7139	P45379	TNNT2	Troponin T, cardiac muscle (TnTc) (Cardiac muscle troponin T) (cTnT)	HP:0000006	Autosomal dominant inheritance	34
2247	P09038	FGF2	Fibroblast growth factor 2 (FGF-2) (Basic fibroblast growth factor) (bFGF) (Heparin-binding growth factor 2) (HBGF-2)	HP:0000006	Autosomal dominant inheritance	35
440686	Q5TEC6	H3PS2	Histone HIST2H3PS2	HP:0000006	Autosomal dominant inheritance	36
815	Q9UQM7	KCC2A	Calcium/calmodulin-dependent protein kinase type II subunit alpha (CaM kinase II subunit alpha) (CaMK-II subunit alpha) (EC 2.7.11.17)	HP:0000006	Autosomal dominant inheritance	37
88	P35609	ACTN2	Alpha-actinin-2 (Alpha-actinin skeletal muscle isoform 2) (F-actin cross-linking protein)	HP:0000006	Autosomal dominant inheritance	38
5080	P26367	PAX6	Paired box protein Pax-6 (Aniridia type II protein) (Oculorhombin)	HP:0000006	Autosomal dominant inheritance	39
1029	P42771	CDN2A	Cyclin-dependent kinase inhibitor 2A (Cyclin-dependent kinase 4 inhibitor A) (CDK4I) (Multiple tumor suppressor 1) (MTS-1) (p16-INK4a) (p16-INK4) (p16INK4A)	HP:0000006	Autosomal dominant inheritance	40
1385	P16220	CREB1	Cyclic AMP-responsive element-binding protein 1 (CREB-1) (cAMP-responsive element-binding protein 1)	HP:0000006	Autosomal dominant inheritance	41
2146	Q15910	EZH2	Histone-lysine N-methyltransferase EZH2 (EC 2.1.1.356) (ENX-1) (Enhancer of zeste homolog 2) (Lysine N-methyltransferase 6)	HP:0000006	Autosomal dominant inheritance	42
3746	P48547	KCNC1	Potassium voltage-gated channel subfamily C member 1 (NGK2) (Voltage-gated potassium channel subunit Kv3.1) (Voltage-gated potassium channel subunit Kv4)	HP:0000006	Autosomal dominant inheritance	43
999	P12830	CADH1	Cadherin-1 (CAM 120/80) (Epithelial cadherin) (E-cadherin) (Uvomorulin) (CD antigen CD324) [Cleaved into: E-Cad/CTF1; E-Cad/CTF2; E-Cad/CTF3]	HP:0000006	Autosomal dominant inheritance	44
6469	Q15465	SHH	Sonic hedgehog protein (SHH) (HHG-1) (Shh unprocessed N-terminal signaling and C-terminal autoprocessing domains) (ShhNC) [Cleaved into: Sonic hedgehog protein N-product (ShhN) (Shh N-terminal processed signaling domains) (ShhNp)]	HP:0000006	Autosomal dominant inheritance	45
4607	Q14896	MYPC3	Myosin-binding protein C, cardiac-type (Cardiac MyBP-C) (C-protein, cardiac muscle isoform)	HP:0000006	Autosomal dominant inheritance	46
773	O00555	CAC1A	Voltage-dependent P/Q-type calcium channel subunit alpha-1A (Brain calcium channel I) (BI) (Calcium channel, L type, alpha-1 polypeptide isoform 4) (Voltage-gated calcium channel subunit alpha Cav2.1)	HP:0000006	Autosomal dominant inheritance	47
2099	P03372	ESR1	Estrogen receptor (ER) (ER-alpha) (Estradiol receptor) (Nuclear receptor subfamily 3 group A member 1)	HP:0000006	Autosomal dominant inheritance	48
6597	P51532	SMCA4	Transcription activator BRG1 (EC 3.6.4.-) (ATP-dependent helicase SMARCA4) (BRG1-associated factor 190A) (BAF190A) (Mitotic growth and transcription activator) (Protein BRG-1) (Protein brahma homolog 1) (SNF2-beta) (SWI/SNF-related matrix-associated actin-dependent regulator of chromatin subfamily A member 4)	HP:0000006	Autosomal dominant inheritance	49
6262	Q92736	RYR2	Ryanodine receptor 2 (RYR-2) (RyR2) (hRYR-2) (Cardiac muscle ryanodine receptor) (Cardiac muscle ryanodine receptor-calcium release channel) (Type 2 ryanodine receptor)	HP:0000006	Autosomal dominant inheritance	50
3066	Q92769	HDAC2	Histone deacetylase 2 (HD2) (EC 3.5.1.98)	HP:0000006	Autosomal dominant inheritance	51
8085	O14686	KMT2D	Histone-lysine N-methyltransferase 2D (Lysine N-methyltransferase 2D) (EC 2.1.1.354) (ALL1-related protein) (Myeloid/lymphoid or mixed-lineage leukemia protein 2)	HP:0000006	Autosomal dominant inheritance	52
4087	Q15796	SMAD2	Mothers against decapentaplegic homolog 2 (MAD homolog 2) (Mothers against DPP homolog 2) (JV18-1) (Mad-related protein 2) (hMAD-2) (SMAD family member 2) (SMAD 2) (Smad2) (hSMAD2)	HP:0000006	Autosomal dominant inheritance	53
6261	P21817	RYR1	Ryanodine receptor 1 (RYR-1) (RyR1) (Skeletal muscle calcium release channel) (Skeletal muscle ryanodine receptor) (Skeletal muscle-type ryanodine receptor) (Type 1 ryanodine receptor)	HP:0000006	Autosomal dominant inheritance	54
5594	P28482	MK01	Mitogen-activated protein kinase 1 (MAP kinase 1) (MAPK 1) (EC 2.7.11.24) (ERT1) (Extracellular signal-regulated kinase 2) (ERK-2) (MAP kinase isoform p42) (p42-MAPK) (Mitogen-activated protein kinase 2) (MAP kinase 2) (MAPK 2)	HP:0000006	Autosomal dominant inheritance	55
8048	P50461	CSRP3	Cysteine and glycine-rich protein 3 (Cardiac LIM protein) (Cysteine-rich protein 3) (CRP3) (LIM domain protein, cardiac) (Muscle LIM protein)	HP:0000006	Autosomal dominant inheritance	56
3670	P61371	ISL1	Insulin gene enhancer protein ISL-1 (Islet-1)	HP:0000006	Autosomal dominant inheritance	57
6331	Q14524	SCN5A	Sodium channel protein type 5 subunit alpha (Sodium channel protein cardiac muscle subunit alpha) (Sodium channel protein type V subunit alpha) (Voltage-gated sodium channel subunit alpha Nav1.5) (hH1)	HP:0000006	Autosomal dominant inheritance	58
2475	P42345	MTOR	Serine/threonine-protein kinase mTOR (EC 2.7.11.1) (FK506-binding protein 12-rapamycin complex-associated protein 1) (FKBP12-rapamycin complex-associated protein) (Mammalian target of rapamycin) (mTOR) (Mechanistic target of rapamycin) (Rapamycin and FKBP12 target 1) (Rapamycin target protein 1)	HP:0000006	Autosomal dominant inheritance	59
4088	P84022	SMAD3	Mothers against decapentaplegic homolog 3 (MAD homolog 3) (Mad3) (Mothers against DPP homolog 3) (hMAD-3) (JV15-2) (SMAD family member 3) (SMAD 3) (Smad3) (hSMAD3)	HP:0000006	Autosomal dominant inheritance	60
2891	P42262	GRIA2	Glutamate receptor 2 (GluR-2) (AMPA-selective glutamate receptor 2) (GluR-B) (GluR-K2) (Glutamate receptor ionotropic, AMPA 2) (GluA2)	HP:0000006	Autosomal dominant inheritance	61
5816	P20472	PRVA	Parvalbumin alpha	HP:0000006	Autosomal dominant inheritance	62
140679	Q9H598	VIAAT	Vesicular inhibitory amino acid transporter (GABA and glycine transporter) (Solute carrier family 32 member 1) (Vesicular GABA transporter) (hVIAAT)	HP:0000006	Autosomal dominant inheritance	63
54715	Q9NWB1	RFOX1	RNA binding protein fox-1 homolog 1 (Ataxin-2-binding protein 1) (Fox-1 homolog A) (Hexaribonucleotide-binding protein 1)	HP:0000006	Autosomal dominant inheritance	64
4634	P08590	MYL3	Myosin light chain 3 (Cardiac myosin light chain 1) (CMLC1) (Myosin light chain 1, slow-twitch muscle B/ventricular isoform) (MLC1SB) (Ventricular myosin alkali light chain) (Ventricular myosin light chain 1) (VLCl) (Ventricular/slow twitch myosin alkali light chain) (MLC-lV/sb)	HP:0000006	Autosomal dominant inheritance	65
491	Q01814	AT2B2	Plasma membrane calcium-transporting ATPase 2 (PMCA2) (EC 7.2.2.10) (Plasma membrane calcium ATPase isoform 2) (Plasma membrane calcium pump isoform 2)	HP:0000006	Autosomal dominant inheritance	66
2566	P18507	GBRG2	Gamma-aminobutyric acid receptor subunit gamma-2 (GABA(A) receptor subunit gamma-2)	HP:0000006	Autosomal dominant inheritance	67
2626	P43694	GATA4	Transcription factor GATA-4 (GATA-binding factor 4)	HP:0000006	Autosomal dominant inheritance	68
6662	P48436	SOX9	Transcription factor SOX-9	HP:0000006	Autosomal dominant inheritance	69
9757	Q9UMN6	KMT2B	Histone-lysine N-methyltransferase 2B (Lysine N-methyltransferase 2B) (EC 2.1.1.354) (Myeloid/lymphoid or mixed-lineage leukemia protein 4) (Trithorax homolog 2) (WW domain-binding protein 7) (WBP-7)	HP:0000006	Autosomal dominant inheritance	70
51778	Q9NPC6	MYOZ2	Myozenin-2 (Calsarcin-1) (FATZ-related protein 2)	HP:0000006	Autosomal dominant inheritance	71
57030	Q9P2U7	VGLU1	Vesicular glutamate transporter 1 (VGluT1) (Brain-specific Na(+)-dependent inorganic phosphate cotransporter) (Solute carrier family 17 member 7)	HP:0000006	Autosomal dominant inheritance	72
1482	P52952	NKX25	Homeobox protein Nkx-2.5 (Cardiac-specific homeobox) (Homeobox protein CSX) (Homeobox protein NK-2 homolog E)	HP:0000006	Autosomal dominant inheritance	73
7471	P04628	WNT1	Proto-oncogene Wnt-1 (Proto-oncogene Int-1 homolog)	HP:0000006	Autosomal dominant inheritance	74
51412	O94805	ACL6B	Actin-like protein 6B (53 kDa BRG1-associated factor B) (Actin-related protein Baf53b) (ArpNalpha) (BRG1-associated factor 53B) (BAF53B)	HP:0000006	Autosomal dominant inheritance	75
23411	Q96EB6	SIR1	NAD-dependent protein deacetylase sirtuin-1 (hSIRT1) (EC 2.3.1.286) (NAD-dependent protein deacylase sirtuin-1) (EC 2.3.1.-) (Regulatory protein SIR2 homolog 1) (SIR2-like protein 1) (hSIR2) [Cleaved into: SirtT1 75 kDa fragment (75SirT1)]	HP:0000006	Autosomal dominant inheritance	76
4629	P35749	MYH11	Myosin-11 (Myosin heavy chain 11) (Myosin heavy chain, smooth muscle isoform) (SMMHC)	HP:0000006	Autosomal dominant inheritance	77
3751	Q9NZV8	KCND2	Potassium voltage-gated channel subfamily D member 2 (Voltage-gated potassium channel subunit Kv4.2)	HP:0000006	Autosomal dominant inheritance	78
2932	P49841	GSK3B	Glycogen synthase kinase-3 beta (GSK-3 beta) (EC 2.7.11.26) (Serine/threonine-protein kinase GSK3B) (EC 2.7.11.1)	HP:0000006	Autosomal dominant inheritance	79
6853	P17600	SYN1	Synapsin-1 (Brain protein 4.1) (Synapsin I)	HP:0000006	Autosomal dominant inheritance	80
6722	P11831	SRF	Serum response factor (SRF)	HP:0000006	Autosomal dominant inheritance	81
4633	P10916	MLRV	Myosin regulatory light chain 2, ventricular/cardiac muscle isoform (MLC-2) (MLC-2v) (Cardiac myosin light chain 2) (Myosin light chain 2, slow skeletal/ventricular muscle isoform) (MLC-2s/v) (Ventricular myosin light chain 2)	HP:0000006	Autosomal dominant inheritance	82
1995	Q14576	ELAV3	ELAV-like protein 3 (Hu-antigen C) (HuC) (Paraneoplastic cerebellar degeneration-associated antigen) (Paraneoplastic limbic encephalitis antigen 21)	HP:0000006	Autosomal dominant inheritance	83
2670	P14136	GFAP	Glial fibrillary acidic protein (GFAP)	HP:0000006	Autosomal dominant inheritance	84
146713	A6NFN3	RFOX3	RNA binding protein fox-1 homolog 3 (Fox-1 homolog C) (Neuronal nuclei antigen) (NeuN antigen)	HP:0000006	Autosomal dominant inheritance	85
492	Q16720	AT2B3	Plasma membrane calcium-transporting ATPase 3 (PMCA3) (EC 7.2.2.10) (Plasma membrane calcium ATPase isoform 3) (Plasma membrane calcium pump isoform 3)	HP:0000006	Autosomal dominant inheritance	86
7474	P41221	WNT5A	Protein Wnt-5a	HP:0000006	Autosomal dominant inheritance	87
7137	P19429	TNNI3	Troponin I, cardiac muscle (Cardiac troponin I)	HP:0000006	Autosomal dominant inheritance	88
8289	O14497	ARI1A	AT-rich interactive domain-containing protein 1A (ARID domain-containing protein 1A) (B120) (BRG1-associated factor 250) (BAF250) (BRG1-associated factor 250a) (BAF250A) (Osa homolog 1) (hOSA1) (SWI-like protein) (SWI/SNF complex protein p270) (SWI/SNF-related, matrix-associated, actin-dependent regulator of chromatin subfamily F member 1) (hELD)	HP:0000006	Autosomal dominant inheritance	89
6855	P08247	SYPH	Synaptophysin (Major synaptic vesicle protein p38)	HP:0000006	Autosomal dominant inheritance	90
58508	Q8NEZ4	KMT2C	Histone-lysine N-methyltransferase 2C (Lysine N-methyltransferase 2C) (EC 2.1.1.354) (Homologous to ALR protein) (Myeloid/lymphoid or mixed-lineage leukemia protein 3)	HP:0000006	Autosomal dominant inheritance	91
6714	P12931	SRC	Proto-oncogene tyrosine-protein kinase Src (EC 2.7.10.2) (Proto-oncogene c-Src) (pp60c-src) (p60-Src)	HP:0000006	Autosomal dominant inheritance	92
4656	P15173	MYOG	Myogenin (Class C basic helix-loop-helix protein 3) (bHLHc3) (Myogenic factor 4) (Myf-4)	HP:0000006	Autosomal dominant inheritance	93
7472	P09544	WNT2	Protein Wnt-2 (Int-1-like protein 1) (Int-1-related protein) (IRP)	HP:0000006	Autosomal dominant inheritance	94
71	P63261	ACTG	Actin, cytoplasmic 2 (Gamma-actin) [Cleaved into: Actin, cytoplasmic 2, N-terminally processed]	HP:0000006	Autosomal dominant inheritance	95
9172	P54296	MYOM2	Myomesin-2 (165 kDa connectin-associated protein) (165 kDa titin-associated protein) (M-protein) (Myomesin family member 2)	HP:0000006	Autosomal dominant inheritance	96
9611	O75376	NCOR1	Nuclear receptor corepressor 1 (N-CoR) (N-CoR1)	HP:0000006	Autosomal dominant inheritance	97
774	Q00975	CAC1B	Voltage-dependent N-type calcium channel subunit alpha-1B (Brain calcium channel III) (BIII) (Calcium channel, L type, alpha-1 polypeptide isoform 5) (Voltage-gated calcium channel subunit alpha Cav2.2)	HP:0000006	Autosomal dominant inheritance	98
29072	Q9BYW2	SETD2	Histone-lysine N-methyltransferase SETD2 (EC 2.1.1.359) (HIF-1) (Huntingtin yeast partner B) (Huntingtin-interacting protein 1) (HIP-1) (Huntingtin-interacting protein B) (Lysine N-methyltransferase 3A) (Protein-lysine N-methyltransferase SETD2) (EC 2.1.1.-) (SET domain-containing protein 2) (hSET2) (p231HBP)	HP:0000006	Autosomal dominant inheritance	99
3737	P16389	KCNA2	Potassium voltage-gated channel subfamily A member 2 (NGK1) (Voltage-gated K(+) channel HuKIV) (Voltage-gated potassium channel HBK5) (Voltage-gated potassium channel subunit Kv1.2)	HP:0000006	Autosomal dominant inheritance	100
859	P56539	CAV3	Caveolin-3 (M-caveolin)	HP:0000006	Autosomal dominant inheritance	101
6910	Q99593	TBX5	T-box transcription factor TBX5 (T-box protein 5)	HP:0000006	Autosomal dominant inheritance	102
2064	P04626	ERBB2	Receptor tyrosine-protein kinase erbB-2 (EC 2.7.10.1) (Metastatic lymph node gene 19 protein) (MLN 19) (Proto-oncogene Neu) (Proto-oncogene c-ErbB-2) (Tyrosine kinase-type cell surface receptor HER2) (p185erbB2) (CD antigen CD340)	HP:0000006	Autosomal dominant inheritance	103
650	P12643	BMP2	Bone morphogenetic protein 2 (BMP-2) (Bone morphogenetic protein 2A) (BMP-2A)	HP:0000006	Autosomal dominant inheritance	104
9759	P56524	HDAC4	Histone deacetylase 4 (HD4) (EC 3.5.1.98)	HP:0000006	Autosomal dominant inheritance	105
9612	Q9Y618	NCOR2	Nuclear receptor corepressor 2 (N-CoR2) (CTG repeat protein 26) (SMAP270) (Silencing mediator of retinoic acid and thyroid hormone receptor) (SMRT) (T3 receptor-associating factor) (TRAC) (Thyroid-, retinoic-acid-receptor-associated corepressor)	HP:0000006	Autosomal dominant inheritance	106
8850	Q92831	KAT2B	Histone acetyltransferase KAT2B (EC 2.3.1.48) (Histone acetyltransferase PCAF) (Histone acetylase PCAF) (Lysine acetyltransferase 2B) (P300/CBP-associated factor) (P/CAF) (Spermidine acetyltransferase KAT2B) (EC 2.3.1.57)	HP:0000006	Autosomal dominant inheritance	107
1277	P02452	CO1A1	Collagen alpha-1(I) chain (Alpha-1 type I collagen)	HP:0000006	Autosomal dominant inheritance	108
23067	Q9UPS6	SET1B	Histone-lysine N-methyltransferase SETD1B (EC 2.1.1.354) (Lysine N-methyltransferase 2G) (SET domain-containing protein 1B) (hSET1B)	HP:0000006	Autosomal dominant inheritance	109
2915	P41594	GRM5	Metabotropic glutamate receptor 5 (mGluR5)	HP:0000006	Autosomal dominant inheritance	110
2290	P55316	FOXG1	Forkhead box protein G1 (Brain factor 1) (BF-1) (BF1) (Brain factor 2) (BF-2) (BF2) (hBF-2) (Forkhead box protein G1A) (Forkhead box protein G1B) (Forkhead box protein G1C) (Forkhead-related protein FKHL1) (HFK1) (Forkhead-related protein FKHL2) (HFK2) (Forkhead-related protein FKHL3) (HFK3)	HP:0000006	Autosomal dominant inheritance	111
6615	O95863	SNAI1	Zinc finger protein SNAI1 (Protein snail homolog 1) (Protein sna)	HP:0000006	Autosomal dominant inheritance	112
10368	O60359	CCG3	Voltage-dependent calcium channel gamma-3 subunit (Neuronal voltage-gated calcium channel gamma-3 subunit) (Transmembrane AMPAR regulatory protein gamma-3) (TARP gamma-3)	HP:0000006	Autosomal dominant inheritance	113
4137	P10636	TAU	Microtubule-associated protein tau (Neurofibrillary tangle protein) (Paired helical filament-tau) (PHF-tau)	HP:0000006	Autosomal dominant inheritance	114
2697	P17302	CXA1	Gap junction alpha-1 protein (Connexin-43) (Cx43) (Gap junction 43 kDa heart protein)	HP:0000006	Autosomal dominant inheritance	115
2903	Q12879	NMDE1	Glutamate receptor ionotropic, NMDA 2A (GluN2A) (Glutamate [NMDA] receptor subunit epsilon-1) (N-methyl D-aspartate receptor subtype 2A) (NMDAR2A) (NR2A) (hNR2A)	HP:0000006	Autosomal dominant inheritance	116
10021	Q9Y3Q4	HCN4	Potassium/sodium hyperpolarization-activated cyclic nucleotide-gated channel 4	HP:0000006	Autosomal dominant inheritance	117
10345	Q13061	TRDN	Triadin	HP:0000006	Autosomal dominant inheritance	118
89780	P56704	WNT3A	Protein Wnt-3a	HP:0000006	Autosomal dominant inheritance	119
4619	P12882	MYH1	Myosin-1 (Myosin heavy chain 1) (Myosin heavy chain 2x) (MyHC-2x) (Myosin heavy chain IIx/d) (MyHC-IIx/d) (Myosin heavy chain, skeletal muscle, adult 1)	HP:0000006	Autosomal dominant inheritance	120
8841	O15379	HDAC3	Histone deacetylase 3 (HD3) (EC 3.5.1.98) (RPD3-2) (SMAP45)	HP:0000006	Autosomal dominant inheritance	121
9739	O15047	SET1A	Histone-lysine N-methyltransferase SETD1A (EC 2.1.1.354) (Lysine N-methyltransferase 2F) (SET domain-containing protein 1A) (hSET1A) (Set1/Ash2 histone methyltransferase complex subunit SET1)	HP:0000006	Autosomal dominant inheritance	122
83482	Q9BWW7	SCRT1	Transcriptional repressor scratch 1 (Scratch homolog 1 zinc finger protein) (SCRT) (Scratch 1) (hScrt)	HP:0000006	Autosomal dominant inheritance	123
6529	P30531	SC6A1	Sodium- and chloride-dependent GABA transporter 1 (GAT-1) (Solute carrier family 6 member 1)	HP:0000006	Autosomal dominant inheritance	124
4617	P13349	MYF5	Myogenic factor 5 (Myf-5) (Class C basic helix-loop-helix protein 2) (bHLHc2)	HP:0000006	Autosomal dominant inheritance	125
59	P62736	ACTA	Actin, aortic smooth muscle (Alpha-actin-2) (Cell growth-inhibiting gene 46 protein) [Cleaved into: Actin, aortic smooth muscle, intermediate form]	HP:0000006	Autosomal dominant inheritance	126
3479	P05019	IGF1	Insulin-like growth factor I (IGF-I) (Mechano growth factor) (MGF) (Somatomedin-C)	HP:0000006	Autosomal dominant inheritance	127
3630	P01308	INS	Insulin [Cleaved into: Insulin B chain; Insulin A chain]	HP:0000006	Autosomal dominant inheritance	128
2563	O14764	GBRD	Gamma-aminobutyric acid receptor subunit delta (GABA(A) receptor subunit delta)	HP:0000006	Autosomal dominant inheritance	129
794	P22676	CALB2	Calretinin (CR) (29 kDa calbindin)	HP:0000006	Autosomal dominant inheritance	130
3765	Q92806	KCNJ9	G protein-activated inward rectifier potassium channel 3 (GIRK-3) (Inward rectifier K(+) channel Kir3.3) (Potassium channel, inwardly rectifying subfamily J member 9)	HP:0000006	Autosomal dominant inheritance	131
8927	Q9UPA5	BSN	Protein bassoon (Zinc finger protein 231)	HP:0000006	Autosomal dominant inheritance	132
1950	P01133	EGF	Pro-epidermal growth factor (EGF) [Cleaved into: Epidermal growth factor (Urogastrone)]	HP:0000006	Autosomal dominant inheritance	133
7422	P15692	VEGFA	Vascular endothelial growth factor A (VEGF-A) (Vascular permeability factor) (VPF)	HP:0000006	Autosomal dominant inheritance	134
5460	Q01860	PO5F1	POU domain, class 5, transcription factor 1 (Octamer-binding protein 3) (Oct-3) (Octamer-binding protein 4) (Oct-4) (Octamer-binding transcription factor 3) (OTF-3)	HP:0000006	Autosomal dominant inheritance	135
57680	Q9HCK8	CHD8	Chromodomain-helicase-DNA-binding protein 8 (CHD-8) (EC 3.6.4.12) (ATP-dependent helicase CHD8) (Helicase with SNF2 domain 1)	HP:0000006	Autosomal dominant inheritance	136
6334	Q9UQD0	SCN8A	Sodium channel protein type 8 subunit alpha (Sodium channel protein type VIII subunit alpha) (Voltage-gated sodium channel subunit alpha Nav1.6)	HP:0000006	Autosomal dominant inheritance	137
777	Q15878	CAC1E	Voltage-dependent R-type calcium channel subunit alpha-1E (Brain calcium channel II) (BII) (Calcium channel, L type, alpha-1 polypeptide, isoform 6) (Voltage-gated calcium channel subunit alpha Cav2.3)	HP:0000006	Autosomal dominant inheritance	138
25942	Q96ST3	SIN3A	Paired amphipathic helix protein Sin3a (Histone deacetylase complex subunit Sin3a) (Transcriptional corepressor Sin3a)	HP:0000006	Autosomal dominant inheritance	139
10763	P48681	NEST	Nestin	HP:0000006	Autosomal dominant inheritance	140
2554	P14867	GBRA1	Gamma-aminobutyric acid receptor subunit alpha-1 (GABA(A) receptor subunit alpha-1)	HP:0000006	Autosomal dominant inheritance	141
1742	P78352	DLG4	Disks large homolog 4 (Postsynaptic density protein 95) (PSD-95) (Synapse-associated protein 90) (SAP-90) (SAP90)	HP:0000006	Autosomal dominant inheritance	142
793	P05937	CALB1	Calbindin (Calbindin D28) (D-28K) (Vitamin D-dependent calcium-binding protein, avian-type)	HP:0000006	Autosomal dominant inheritance	143
6323	P35498	SCN1A	Sodium channel protein type 1 subunit alpha (Sodium channel protein brain I subunit alpha) (Sodium channel protein type I subunit alpha) (Voltage-gated sodium channel subunit alpha Nav1.1)	HP:0000006	Autosomal dominant inheritance	144
89	Q08043	ACTN3	Alpha-actinin-3 (Alpha-actinin skeletal muscle isoform 3) (F-actin cross-linking protein)	HP:0000006	Autosomal dominant inheritance	145
4622	Q9Y623	MYH4	Myosin-4 (Myosin heavy chain 2b) (MyHC-2b) (Myosin heavy chain 4) (Myosin heavy chain IIb) (MyHC-IIb) (Myosin heavy chain, skeletal muscle, fetal)	HP:0000006	Autosomal dominant inheritance	146
10716	Q16650	TBR1	T-box brain protein 1 (T-brain-1) (TBR-1) (TES-56)	HP:0000006	Autosomal dominant inheritance	147
4632	P05976	MYL1	Myosin light chain 1/3, skeletal muscle isoform (MLC1/MLC3) (MLC1F/MLC3F) (Myosin light chain alkali 1/2) (Myosin light chain A1/A2)	HP:0000006	Autosomal dominant inheritance	148
3320	P07900	HS90A	Heat shock protein HSP 90-alpha (EC 3.6.4.10) (Heat shock 86 kDa) (HSP 86) (HSP86) (Lipopolysaccharide-associated protein 2) (LAP-2) (LPS-associated protein 2) (Renal carcinoma antigen NY-REN-38)	HP:0000006	Autosomal dominant inheritance	149
2309	O43524	FOXO3	Forkhead box protein O3 (AF6q21 protein) (Forkhead in rhabdomyosarcoma-like 1)	HP:0000006	Autosomal dominant inheritance	150
80183	Q9H714	PACER	Protein associated with UVRAG as autophagy enhancer (Pacer) (Protein Rubicon-like)	HP:0000007	Autosomal recessive inheritance	1
100287478	D6R901	U17LL	Ubiquitin carboxyl-terminal hydrolase 17-like protein 21 (EC 3.4.19.12)	HP:0000007	Autosomal recessive inheritance	2
100287441	D6RJB6	U17LK	Ubiquitin carboxyl-terminal hydrolase 17-like protein 20 (EC 3.4.19.12)	HP:0000007	Autosomal recessive inheritance	3
100287404	D6RCP7	U17LJ	Ubiquitin carboxyl-terminal hydrolase 17-like protein 19 (EC 3.4.19.12)	HP:0000007	Autosomal recessive inheritance	4
100287144	C9JJH3	U17LA	Ubiquitin carboxyl-terminal hydrolase 17-like protein 10 (EC 3.4.19.12)	HP:0000007	Autosomal recessive inheritance	5
100288520	C9J2P7	U17LF	Ubiquitin carboxyl-terminal hydrolase 17-like protein 15 (EC 3.4.19.12)	HP:0000007	Autosomal recessive inheritance	6
100287205	C9JPN9	UL17C	Ubiquitin carboxyl-terminal hydrolase 17-like protein 12 (EC 3.4.19.12)	HP:0000007	Autosomal recessive inheritance	7
100287238	C9JLJ4	U17LD	Ubiquitin carboxyl-terminal hydrolase 17-like protein 13 (EC 3.4.19.12)	HP:0000007	Autosomal recessive inheritance	8
645836	A6NCW0	U17L3	Ubiquitin carboxyl-terminal hydrolase 17-like protein 3 (EC 3.4.19.12) (Deubiquitinating enzyme 17-like protein 3) (Ubiquitin thioesterase 17-like protein 3) (Ubiquitin-specific-processing protease 17-like protein 3)	HP:0000007	Autosomal recessive inheritance	9
100287513	D6RA61	U17LM	Ubiquitin carboxyl-terminal hydrolase 17-like protein 22 (EC 3.4.19.12)	HP:0000007	Autosomal recessive inheritance	10
728386	A8MUK1	U17L5	Ubiquitin carboxyl-terminal hydrolase 17-like protein 5 (EC 3.4.19.12) (Deubiquitinating enzyme 17-like protein 5) (Ubiquitin thioesterase 17-like protein 5) (Ubiquitin-specific-processing protease 17-like protein 5)	HP:0000007	Autosomal recessive inheritance	11
100287178	C9JVI0	U17LB	Ubiquitin carboxyl-terminal hydrolase 17-like protein 11 (EC 3.4.19.12)	HP:0000007	Autosomal recessive inheritance	12
100287364	D6R9N7	U17LI	Ubiquitin carboxyl-terminal hydrolase 17-like protein 18 (EC 3.4.19.12)	HP:0000007	Autosomal recessive inheritance	13
392188	P0C7I0	U17L8	Inactive ubiquitin carboxyl-terminal hydrolase 17-like protein 8	HP:0000007	Autosomal recessive inheritance	14
100287327	D6RBQ6	U17LH	Ubiquitin carboxyl-terminal hydrolase 17-like protein 17 (EC 3.4.19.12)	HP:0000007	Autosomal recessive inheritance	15
92749	Q96MC2	DRC1	Dynein regulatory complex protein 1 (Coiled-coil domain-containing protein 164)	HP:0000007	Autosomal recessive inheritance	16
79026	Q09666	AHNK	Neuroblast differentiation-associated protein AHNAK (Desmoyokin)	HP:0000007	Autosomal recessive inheritance	17
113146	Q8IVF2	AHNK2	Protein AHNAK2	HP:0000007	Autosomal recessive inheritance	18
55036	Q4G0X9	CCD40	Coiled-coil domain-containing protein 40	HP:0000007	Autosomal recessive inheritance	19
339829	Q9UFE4	CCD39	Coiled-coil domain-containing protein 39	HP:0000007	Autosomal recessive inheritance	20
84197	Q9H5K3	SG196	Protein O-mannose kinase (POMK) (EC 2.7.1.183) (Protein kinase-like protein SgK196) (Sugen kinase 196)	HP:0000007	Autosomal recessive inheritance	21
23639	Q86X45	TILB	Protein tilB homolog (Leucine-rich repeat-containing protein 6) (Leucine-rich testis-specific protein) (Testis-specific leucine-rich repeat protein)	HP:0000007	Autosomal recessive inheritance	22
123872	Q8NEP3	DAAF1	Dynein assembly factor 1, axonemal (Leucine-rich repeat-containing protein 50)	HP:0000007	Autosomal recessive inheritance	23
388389	Q8IW40	CC103	Coiled-coil domain-containing protein 103	HP:0000007	Autosomal recessive inheritance	24
345895	Q5TD94	RSH4A	Radial spoke head protein 4 homolog A (Radial spoke head-like protein 3)	HP:0000007	Autosomal recessive inheritance	25
85478	Q8IXS2	DRC2	Dynein regulatory complex subunit 2 (Coiled-coil domain-containing protein 65) (Testis development protein NYD-SP28)	HP:0000007	Autosomal recessive inheritance	26
54919	Q86Y56	DAAF5	Dynein assembly factor 5, axonemal (HEAT repeat-containing protein 2)	HP:0000007	Autosomal recessive inheritance	27
401447	Q7RTZ2	U17L1	Ubiquitin carboxyl-terminal hydrolase 17-like protein 1 (EC 3.4.19.12) (Deubiquitinating enzyme 17-like protein 1) (Ubiquitin thioesterase 17-like protein 1) (Ubiquitin-specific-processing protease 17-like protein 1)	HP:0000007	Autosomal recessive inheritance	28
54344	Q9P2X0	DPM3	Dolichol-phosphate mannosyltransferase subunit 3 (Dolichol-phosphate mannose synthase subunit 3) (DPM synthase subunit 3) (Dolichyl-phosphate beta-D-mannosyltransferase subunit 3) (Mannose-P-dolichol synthase subunit 3) (MPD synthase subunit 3) (Prostin-1)	HP:0000007	Autosomal recessive inheritance	29
7802	O14645	IDLC	Axonemal dynein light intermediate polypeptide 1 (Inner dynein arm light chain, axonemal) (hp28)	HP:0000007	Autosomal recessive inheritance	30
388939	A6NGG8	PCARE	Photoreceptor cilium actin regulator	HP:0000007	Autosomal recessive inheritance	31
56683	P57076	CF298	Cilia- and flagella-associated protein 298 (Protein kurly homolog)	HP:0000007	Autosomal recessive inheritance	32
115948	A5D8V7	ODAD3	Outer dynein arm-docking complex subunit 3 (Coiled-coil domain-containing protein 151)	HP:0000007	Autosomal recessive inheritance	33
55172	Q9NVR5	KTU	Protein kintoun (Dynein assembly factor 2, axonemal)	HP:0000007	Autosomal recessive inheritance	34
9409	Q9Y5Y5	PEX16	Peroxisomal membrane protein PEX16 (Peroxin-16) (Peroxisomal biogenesis factor 16)	HP:0000007	Autosomal recessive inheritance	35
2622	O95995	DRC4	Dynein regulatory complex subunit 4 (Growth arrest-specific protein 11) (GAS-11) (Growth arrest-specific protein 8) (GAS-8)	HP:0000007	Autosomal recessive inheritance	36
352909	Q8N9W5	DAAF3	Dynein assembly factor 3, axonemal	HP:0000007	Autosomal recessive inheritance	37
93233	Q96M63	ODAD1	Outer dynein arm-docking complex subunit 1 (Coiled-coil domain-containing protein 114)	HP:0000007	Autosomal recessive inheritance	38
10329	Q9Y2B1	RXLT1	Ribitol-5-phosphate xylosyltransferase 1 (EC 2.4.2.-) (Transmembrane protein 5) (UDP-D-xylose:ribitol-5-phosphate beta1,4-xylosyltransferase)	HP:0000007	Autosomal recessive inheritance	39
29954	Q9UKY4	POMT2	Protein O-mannosyl-transferase 2 (EC 2.4.1.109) (Dolichyl-phosphate-mannose--protein mannosyltransferase 2)	HP:0000007	Autosomal recessive inheritance	40
84892	Q8NAT1	PMGT2	Protein O-linked-mannose beta-1,4-N-acetylglucosaminyltransferase 2 (POMGnT2) (EC 2.4.1.312) (Extracellular O-linked N-acetylglucosamine transferase-like) (Glycosyltransferase-like domain-containing protein 2)	HP:0000007	Autosomal recessive inheritance	41
729920	A4D126	ISPD	D-ribitol-5-phosphate cytidylyltransferase (EC 2.7.7.40) (2-C-methyl-D-erythritol 4-phosphate cytidylyltransferase-like protein) (Isoprenoid synthase domain-containing protein) (hISPD)	HP:0000007	Autosomal recessive inheritance	42
7401	P58418	CLRN1	Clarin-1 (Usher syndrome type-3 protein)	HP:0000007	Autosomal recessive inheritance	43
1768	Q9C0G6	DYH6	Dynein heavy chain 6, axonemal (Axonemal beta dynein heavy chain 6) (Ciliary dynein heavy chain 6)	HP:0000007	Autosomal recessive inheritance	44
10585	Q9Y6A1	POMT1	Protein O-mannosyl-transferase 1 (EC 2.4.1.109) (Dolichyl-phosphate-mannose--protein mannosyltransferase 1)	HP:0000007	Autosomal recessive inheritance	45
145226	Q96NR8	RDH12	Retinol dehydrogenase 12 (EC 1.1.1.300) (All-trans and 9-cis retinol dehydrogenase) (Short chain dehydrogenase/reductase family 7C member 2)	HP:0000007	Autosomal recessive inheritance	46
5825	P28288	ABCD3	ATP-binding cassette sub-family D member 3 (70 kDa peroxisomal membrane protein) (PMP70)	HP:0000007	Autosomal recessive inheritance	47
55130	Q5T2S8	ODAD2	Outer dynein arm-docking complex subunit 2 (Armadillo repeat-containing protein 4)	HP:0000007	Autosomal recessive inheritance	48
83538	Q96NG3	ODAD4	Outer dynein arm-docking complex subunit 4 (Tetratricopeptide repeat protein 25) (TPR repeat protein 25)	HP:0000007	Autosomal recessive inheritance	49
375298	Q49MI3	CERKL	Ceramide kinase-like protein	HP:0000007	Autosomal recessive inheritance	50
6094	Q03395	ROM1	Rod outer segment membrane protein 1 (ROSP1) (Tetraspanin-23) (Tspan-23)	HP:0000007	Autosomal recessive inheritance	51
346007	Q5T1H1	EYS	Protein eyes shut homolog (Epidermal growth factor-like protein 10) (EGF-like protein 10) (Epidermal growth factor-like protein 11) (EGF-like protein 11) (Protein spacemaker homolog)	HP:0000007	Autosomal recessive inheritance	52
55212	Q8IWZ6	BBS7	Bardet-Biedl syndrome 7 protein (BBS2-like protein 1)	HP:0000007	Autosomal recessive inheritance	53
79583	Q9H6L2	TM231	Transmembrane protein 231	HP:0000007	Autosomal recessive inheritance	54
64446	Q9GZS0	DNAI2	Dynein intermediate chain 2, axonemal (Axonemal dynein intermediate chain 2)	HP:0000007	Autosomal recessive inheritance	55
8818	O94777	DPM2	Dolichol phosphate-mannose biosynthesis regulatory protein (Dolichol-phosphate mannose synthase subunit 2) (DPM synthase subunit 2)	HP:0000007	Autosomal recessive inheritance	56
200728	Q86X19	TMM17	Transmembrane protein 17	HP:0000007	Autosomal recessive inheritance	57
5189	O43933	PEX1	Peroxisome biogenesis factor 1 (Peroxin-1) (Peroxisome biogenesis disorder protein 1)	HP:0000007	Autosomal recessive inheritance	58
89765	Q8WYR4	RSPH1	Radial spoke head 1 homolog (Cancer/testis antigen 79) (CT79) (Male meiotic metaphase chromosome-associated acidic protein) (Meichroacidin) (Testis-specific gene A2 protein)	HP:0000007	Autosomal recessive inheritance	59
65062	Q96Q45	TM237	Transmembrane protein 237 (Amyotrophic lateral sclerosis 2 chromosomal region candidate gene 4 protein)	HP:0000007	Autosomal recessive inheritance	60
157657	Q96NL8	CH037	Protein C8orf37	HP:0000007	Autosomal recessive inheritance	61
54768	Q4G0P3	HYDIN	Hydrocephalus-inducing protein homolog	HP:0000007	Autosomal recessive inheritance	62
65250	Q9H799	CPLN1	Ciliogenesis and planar polarity effector 1 (Protein JBTS17)	HP:0000007	Autosomal recessive inheritance	63
653643	P0CG33	GOG6D	Golgin subfamily A member 6D	HP:0000007	Autosomal recessive inheritance	64
27019	Q9UI46	DNAI1	Dynein intermediate chain 1, axonemal (Axonemal dynein intermediate chain 1)	HP:0000007	Autosomal recessive inheritance	65
653641	A6NDK9	GOG6C	Golgin subfamily A member 6C	HP:0000007	Autosomal recessive inheritance	66
148789	Q8NCR0	B3GL2	UDP-GalNAc:beta-1,3-N-acetylgalactosaminyltransferase 2 (Beta-1,3-GalNAc-T2) (EC 2.4.1.313) (Beta-1,3-N-acetylgalactosaminyltransferase II)	HP:0000007	Autosomal recessive inheritance	67
79925	Q9C093	SPEF2	Sperm flagellar protein 2 (Protein KPL2)	HP:0000007	Autosomal recessive inheritance	68
6121	Q16518	RPE65	Retinoid isomerohydrolase (EC 3.1.1.64) (All-trans-retinyl-palmitate hydrolase) (Lutein isomerase) (Meso-zeaxanthin isomerase) (EC 5.3.3.22) (Retinal pigment epithelium-specific 65 kDa protein) (Retinol isomerase)	HP:0000007	Autosomal recessive inheritance	69
1384	P43155	CACP	Carnitine O-acetyltransferase (Carnitine acetylase) (EC 2.3.1.137) (EC 2.3.1.7) (Carnitine acetyltransferase) (CAT) (CrAT)	HP:0000007	Autosomal recessive inheritance	70
8309	Q99424	ACOX2	Peroxisomal acyl-coenzyme A oxidase 2 (EC 1.17.99.3) (3-alpha,7-alpha,12-alpha-trihydroxy-5-beta-cholestanoyl-CoA 24-hydroxylase) (3-alpha,7-alpha,12-alpha-trihydroxy-5-beta-cholestanoyl-CoA oxidase) (Trihydroxycoprostanoyl-CoA oxidase) (THCA-CoA oxidase) (THCCox)	HP:0000007	Autosomal recessive inheritance	71
57639	Q8IYE0	CC146	Coiled-coil domain-containing protein 146	HP:0000007	Autosomal recessive inheritance	72
10478	O43808	PM34	Peroxisomal membrane protein PMP34 (34 kDa peroxisomal membrane protein) (Solute carrier family 25 member 17)	HP:0000007	Autosomal recessive inheritance	73
56673	Q9NQ32	CK016	Uncharacterized protein C11orf16	HP:0000007	Autosomal recessive inheritance	74
80173	Q96LB3	IFT74	Intraflagellar transport protein 74 homolog (Capillary morphogenesis gene 1 protein) (CMG-1) (Coiled-coil domain-containing protein 2)	HP:0000007	Autosomal recessive inheritance	75
8701	Q96DT5	DYH11	Dynein heavy chain 11, axonemal (Axonemal beta dynein heavy chain 11) (Ciliary dynein heavy chain 11)	HP:0000007	Autosomal recessive inheritance	76
8310	O15254	ACOX3	Peroxisomal acyl-coenzyme A oxidase 3 (EC 1.3.3.6) (Branched-chain acyl-CoA oxidase) (BRCACox) (Pristanoyl-CoA oxidase)	HP:0000007	Autosomal recessive inheritance	77
51098	Q9Y366	IFT52	Intraflagellar transport protein 52 homolog (Protein NGD5 homolog)	HP:0000007	Autosomal recessive inheritance	78
22845	Q9UPQ8	DOLK	Dolichol kinase (EC 2.7.1.108) (Transmembrane protein 15)	HP:0000007	Autosomal recessive inheritance	79
29925	Q9Y5P6	GMPPB	Mannose-1-phosphate guanyltransferase beta (EC 2.7.7.13) (GDP-mannose pyrophosphorylase B) (GTP-mannose-1-phosphate guanylyltransferase beta)	HP:0000007	Autosomal recessive inheritance	80
643699	F8WBI6	GOG8N	Golgin subfamily A member 8N	HP:0000007	Autosomal recessive inheritance	81
84865	Q17RM4	CC142	Coiled-coil domain-containing protein 142	HP:0000007	Autosomal recessive inheritance	82
583	Q9BXC9	BBS2	Bardet-Biedl syndrome 2 protein	HP:0000007	Autosomal recessive inheritance	83
225	Q9UBJ2	ABCD2	ATP-binding cassette sub-family D member 2 (Adrenoleukodystrophy-like 1) (Adrenoleukodystrophy-related protein) (hALDR)	HP:0000007	Autosomal recessive inheritance	84
139212	Q9NQM4	DAAF6	Dynein assembly factor 6, axonemal (PIH1 domain-containing protein 3) (Sarcoma antigen NY-SAR-97)	HP:0000007	Autosomal recessive inheritance	85
28981	Q8WYA0	IFT81	Intraflagellar transport protein 81 homolog (Carnitine deficiency-associated protein expressed in ventricle 1) (CDV-1)	HP:0000007	Autosomal recessive inheritance	86
57728	Q8NEZ3	WDR19	WD repeat-containing protein 19 (Intraflagellar transport 144 homolog)	HP:0000007	Autosomal recessive inheritance	87
5281	Q07326	PIGF	Phosphatidylinositol-glycan biosynthesis class F protein (PIG-F) (GPI11 homolog)	HP:0000007	Autosomal recessive inheritance	88
84140	Q3B820	F161A	Protein FAM161A	HP:0000007	Autosomal recessive inheritance	89
7399	O75445	USH2A	Usherin (Usher syndrome type IIa protein) (Usher syndrome type-2A protein)	HP:0000007	Autosomal recessive inheritance	90
100287226	A6NN14	ZN729	Zinc finger protein 729	HP:0000007	Autosomal recessive inheritance	91
26160	Q9UG01	IF172	Intraflagellar transport protein 172 homolog	HP:0000007	Autosomal recessive inheritance	92
5373	O15305	PMM2	Phosphomannomutase 2 (PMM 2) (EC 5.4.2.8)	HP:0000007	Autosomal recessive inheritance	93
101059918	I6L899	GOG8R	Golgin subfamily A member 8R	HP:0000007	Autosomal recessive inheritance	94
79809	Q7Z4L5	TT21B	Tetratricopeptide repeat protein 21B (TPR repeat protein 21B) (Intraflagellar transport 139 homolog)	HP:0000007	Autosomal recessive inheritance	95
109703458	P86397	HTD2	Hydroxyacyl-thioester dehydratase type 2, mitochondrial (HsHTD2) (EC 4.2.1.59) (3-hydroxyacyl-[acyl-carrier-protein] dehydratase)	HP:0000007	Autosomal recessive inheritance	96
23059	Q96AJ1	CLUA1	Clusterin-associated protein 1 (Qilin)	HP:0000007	Autosomal recessive inheritance	97
150737	Q8N4P2	TT30B	Tetratricopeptide repeat protein 30B (TPR repeat protein 30B)	HP:0000007	Autosomal recessive inheritance	98
29926	Q96IJ6	GMPPA	Mannose-1-phosphate guanyltransferase alpha (GDP-mannose pyrophosphorylase A) (GMPP-alpha) (GTP-mannose-1-phosphate guanylyltransferase alpha)	HP:0000007	Autosomal recessive inheritance	99
51364	O75800	ZMY10	Zinc finger MYND domain-containing protein 10 (Protein BLu)	HP:0000007	Autosomal recessive inheritance	100
1770	Q9NYC9	DYH9	Dynein heavy chain 9, axonemal (Axonemal beta dynein heavy chain 9) (Ciliary dynein heavy chain 9)	HP:0000007	Autosomal recessive inheritance	101
55670	Q7Z412	PEX26	Peroxisome assembly protein 26 (Peroxin-26)	HP:0000007	Autosomal recessive inheritance	102
92104	Q86WT1	TT30A	Tetratricopeptide repeat protein 30A (TPR repeat protein 30A)	HP:0000007	Autosomal recessive inheritance	103
2086	Q14264	ENR1	Endogenous retrovirus group 3 member 1 Env polyprotein (ERV-3 envelope protein) (ERV3 envelope protein) (ERV3-1 envelope protein) (Envelope polyprotein) (HERV-R envelope protein) (ERV-R envelope protein) (HERV-R_7q21.2 provirus ancestral Env polyprotein) [Cleaved into: Surface protein (SU); Transmembrane protein (TM)]	HP:0000007	Autosomal recessive inheritance	104
129880	Q8N3I7	BBS5	Bardet-Biedl syndrome 5 protein	HP:0000007	Autosomal recessive inheritance	105
582	Q8NFJ9	BBS1	Bardet-Biedl syndrome 1 protein (BBS2-like protein 2)	HP:0000007	Autosomal recessive inheritance	106
51524	Q9NPI0	TM138	Transmembrane protein 138	HP:0000007	Autosomal recessive inheritance	107
51555	Q8IYB4	PEX5R	PEX5-related protein (PEX2-related protein) (PEX5-like protein) (Peroxin-5-related protein) (Peroxisome biogenesis factor 5-like) (Tetratricopeptide repeat-containing Rab8b-interacting protein) (Pex5Rp) (TRIP8b)	HP:0000007	Autosomal recessive inheritance	108
105378803	A6NM62	LRC53	Leucine-rich repeat-containing protein 53	HP:0000007	Autosomal recessive inheritance	109
80221	Q96CM8	ACSF2	Medium-chain acyl-CoA ligase ACSF2, mitochondrial (EC 6.2.1.2)	HP:0000007	Autosomal recessive inheritance	110
4358	P39210	MPV17	Protein Mpv17	HP:0000007	Autosomal recessive inheritance	111
81616	Q5FVE4	ACBG2	Long-chain-fatty-acid--CoA ligase ACSBG2 (EC 6.2.1.3) (Acyl-CoA synthetase bubblegum family member 2) (Arachidonate--CoA ligase ACSBG2) (EC 6.2.1.15) (Bubblegum-related protein) (PRTD-NY3)	HP:0000007	Autosomal recessive inheritance	112
55812	Q9P0W8	SPAT7	Spermatogenesis-associated protein 7 (HSD-3.1) (Spermatogenesis-associated protein HSD3)	HP:0000007	Autosomal recessive inheritance	113
54807	Q9NXT0	ZN586	Zinc finger protein 586	HP:0000007	Autosomal recessive inheritance	114
728498	P0CJ92	GOG8H	Golgin subfamily A member 8H	HP:0000007	Autosomal recessive inheritance	115
257236	Q2M329	CCD96	Coiled-coil domain-containing protein 96	HP:0000007	Autosomal recessive inheritance	116
11264	Q9Y6I8	PXMP4	Peroxisomal membrane protein 4 (24 kDa peroxisomal intrinsic membrane protein)	HP:0000007	Autosomal recessive inheritance	117
3155	P35914	HMGCL	Hydroxymethylglutaryl-CoA lyase, mitochondrial (HL) (HMG-CoA lyase) (EC 4.1.3.4) (3-hydroxy-3-methylglutarate-CoA lyase)	HP:0000007	Autosomal recessive inheritance	118
90410	Q8IY31	IFT20	Intraflagellar transport protein 20 homolog (hIFT20)	HP:0000007	Autosomal recessive inheritance	119
768206	Q00LT1	PRCD	Photoreceptor disk component PRCD (Progressive rod-cone degeneration protein)	HP:0000007	Autosomal recessive inheritance	120
79989	A0AVF1	IFT56	Intraflagellar transport protein 56 (Tetratricopeptide repeat protein 26) (TPR repeat protein 26)	HP:0000007	Autosomal recessive inheritance	121
113675	Q96GA7	SDSL	Serine dehydratase-like (L-serine deaminase) (L-serine dehydratase/L-threonine deaminase) (L-threonine dehydratase) (TDH) (EC 4.3.1.19) (Serine dehydratase 2) (SDH 2) (EC 4.3.1.17)	HP:0000007	Autosomal recessive inheritance	122
586	P54687	BCAT1	Branched-chain-amino-acid aminotransferase, cytosolic (BCAT(c)) (EC 2.6.1.42) (Protein ECA39)	HP:0000007	Autosomal recessive inheritance	123
84314	Q6UX40	TM107	Transmembrane protein 107	HP:0000007	Autosomal recessive inheritance	124
7638	Q9UK13	ZN221	Zinc finger protein 221	HP:0000007	Autosomal recessive inheritance	125
342909	Q2VY69	ZN284	Zinc finger protein 284	HP:0000007	Autosomal recessive inheritance	126
6342	P22307	SCP2	Sterol carrier protein 2 (SCP-2) (Acetyl-CoA C-myristoyltransferase) (EC 2.3.1.155) (Non-specific lipid-transfer protein) (NSL-TP) (Propanoyl-CoA C-acyltransferase) (EC 2.3.1.176) (SCP-2/3-oxoacyl-CoA thiolase) (SCP-2/thiolase) (EC 2.3.1.16) (SCP-chi) (SCPX) (Sterol carrier protein X) (SCP-X) (Straight-chain acyl-CoA oxidase) (SCOX)	HP:0000007	Autosomal recessive inheritance	127
7287	O00294	TULP1	Tubby-related protein 1 (Tubby-like protein 1)	HP:0000007	Autosomal recessive inheritance	128
91574	Q9H3J6	CL065	Probable peptide chain release factor C12orf65, mitochondrial	HP:0000007	Autosomal recessive inheritance	129
24	P78363	ABCA4	Retinal-specific phospholipid-transporting ATPase ABCA4 (EC 7.6.2.1) (ATP-binding cassette sub-family A member 4) (RIM ABC transporter) (RIM protein) (RmP) (Retinal-specific ATP-binding cassette transporter) (Stargardt disease protein)	HP:0000007	Autosomal recessive inheritance	130
6103	Q92834	RPGR	X-linked retinitis pigmentosa GTPase regulator	HP:0000007	Autosomal recessive inheritance	131
1891	Q13011	ECH1	Delta(3,5)-Delta(2,4)-dienoyl-CoA isomerase, mitochondrial (EC 5.3.3.-)	HP:0000007	Autosomal recessive inheritance	132
55624	Q8WZA1	PMGT1	Protein O-linked-mannose beta-1,2-N-acetylglucosaminyltransferase 1 (POMGnT1) (EC 2.4.1.-) (UDP-GlcNAc:alpha-D-mannoside beta-1,2-N-acetylglucosaminyltransferase I.2) (GnT I.2)	HP:0000007	Autosomal recessive inheritance	133
50939	Q9BZV3	IMPG2	Interphotoreceptor matrix proteoglycan 2 (Interphotoreceptor matrix proteoglycan of 200 kDa) (IPM 200) (Sialoprotein associated with cones and rods proteoglycan) (Spacrcan)	HP:0000007	Autosomal recessive inheritance	134
10998	Q9Y2P5	S27A5	Bile acyl-CoA synthetase (BACS) (EC 6.2.1.7) (Bile acid-CoA ligase) (BA-CoA ligase) (BAL) (Cholate--CoA ligase) (Fatty acid transport protein 5) (FATP-5) (Fatty-acid-coenzyme A ligase, very long-chain 3) (Solute carrier family 27 member 5) (Very long-chain acyl-CoA synthetase homolog 2) (VLCS-H2) (VLCSH2) (Very long-chain acyl-CoA synthetase-related protein) (VLACS-related) (VLACSR)	HP:0000007	Autosomal recessive inheritance	135
27077	Q9UPM9	B9D1	B9 domain-containing protein 1 (MKS1-related protein 1)	HP:0000007	Autosomal recessive inheritance	136
1632	P42126	ECI1	Enoyl-CoA delta isomerase 1, mitochondrial (EC 5.3.3.8) (3,2-trans-enoyl-CoA isomerase) (Delta(3),Delta(2)-enoyl-CoA isomerase) (D3,D2-enoyl-CoA isomerase) (Dodecenoyl-CoA isomerase)	HP:0000007	Autosomal recessive inheritance	137
6674	Q07617	SPAG1	Sperm-associated antigen 1 (HSD-3.8) (Infertility-related sperm protein Spag-1)	HP:0000007	Autosomal recessive inheritance	138
150763	Q6NUI2	GPAT2	Glycerol-3-phosphate acyltransferase 2, mitochondrial (GPAT-2) (EC 2.3.1.15) (1-acylglycerol-3-phosphate O-acyltransferase GPAT2) (EC 2.3.1.51) (xGPAT1)	HP:0000007	Autosomal recessive inheritance	139
55711	Q96K12	FACR2	Fatty acyl-CoA reductase 2 (EC 1.2.1.84) (Male sterility domain-containing protein 1)	HP:0000007	Autosomal recessive inheritance	140
10455	O75521	ECI2	Enoyl-CoA delta isomerase 2 (EC 5.3.3.8) (DRS-1) (Delta(3),delta(2)-enoyl-CoA isomerase) (D3,D2-enoyl-CoA isomerase) (Diazepam-binding inhibitor-related protein 1) (DBI-related protein 1) (Dodecenoyl-CoA isomerase) (Hepatocellular carcinoma-associated antigen 88) (Peroxisomal 3,2-trans-enoyl-CoA isomerase) (pECI) (Renal carcinoma antigen NY-REN-1)	HP:0000007	Autosomal recessive inheritance	141
160428	Q3SY69	AL1L2	Mitochondrial 10-formyltetrahydrofolate dehydrogenase (Mitochondrial 10-FTHFDH) (mtFDH) (EC 1.5.1.6) (Aldehyde dehydrogenase family 1 member L2)	HP:0000007	Autosomal recessive inheritance	142
80184	O15078	CE290	Centrosomal protein of 290 kDa (Cep290) (Bardet-Biedl syndrome 14 protein) (Cancer/testis antigen 87) (CT87) (Nephrocystin-6) (Tumor antigen se2-2)	HP:0000007	Autosomal recessive inheritance	143
5195	O75381	PEX14	Peroxisomal membrane protein PEX14 (PTS1 receptor-docking protein) (Peroxin-14) (Peroxisomal membrane anchor protein PEX14)	HP:0000007	Autosomal recessive inheritance	144
8799	O96011	PX11B	Peroxisomal membrane protein 11B (Peroxin-11B) (Peroxisomal biogenesis factor 11B) (Protein PEX11 homolog beta) (PEX11-beta)	HP:0000007	Autosomal recessive inheritance	145
3420	O43837	IDH3B	Isocitrate dehydrogenase [NAD] subunit beta, mitochondrial (Isocitric dehydrogenase subunit beta) (NAD(+)-specific ICDH subunit beta)	HP:0000007	Autosomal recessive inheritance	146
261734	O75161	NPHP4	Nephrocystin-4 (Nephroretinin)	HP:0000007	Autosomal recessive inheritance	147
57096	Q96KN7	RPGR1	X-linked retinitis pigmentosa GTPase regulator-interacting protein 1 (RPGR-interacting protein 1)	HP:0000007	Autosomal recessive inheritance	148
171392	Q8TD23	ZN675	Zinc finger protein 675 (TRAF6-binding zinc finger protein) (TRAF6-inhibitory zinc finger protein)	HP:0000007	Autosomal recessive inheritance	149
83752	Q86WA8	LONP2	Lon protease homolog 2, peroxisomal (EC 3.4.21.53) (Lon protease-like protein 2) (Lon protease 2) (Peroxisomal Lon protease) (pLon)	HP:0000007	Autosomal recessive inheritance	150
675	P51587	BRCA2	Breast cancer type 2 susceptibility protein (Fanconi anemia group D1 protein)	HP:0000008	Abnormal morphology of female internal genitalia	1
5290	P42336	PK3CA	Phosphatidylinositol 4,5-bisphosphate 3-kinase catalytic subunit alpha isoform (PI3-kinase subunit alpha) (PI3K-alpha) (PI3Kalpha) (PtdIns-3-kinase subunit alpha) (EC 2.7.1.137) (EC 2.7.1.153) (Phosphatidylinositol 4,5-bisphosphate 3-kinase 110 kDa catalytic subunit alpha) (PtdIns-3-kinase subunit p110-alpha) (p110alpha) (Phosphoinositide 3-kinase alpha) (Phosphoinositide-3-kinase catalytic alpha…	HP:0000008	Abnormal morphology of female internal genitalia	2
79728	Q86YC2	PALB2	Partner and localizer of BRCA2	HP:0000008	Abnormal morphology of female internal genitalia	3
5728	P60484	PTEN	Phosphatidylinositol 3,4,5-trisphosphate 3-phosphatase and dual-specificity protein phosphatase PTEN (EC 3.1.3.16) (EC 3.1.3.48) (EC 3.1.3.67) (Mutated in multiple advanced cancers 1) (Phosphatase and tensin homolog)	HP:0000008	Abnormal morphology of female internal genitalia	4
2177	Q9BXW9	FACD2	Fanconi anemia group D2 protein (Protein FACD2)	HP:0000008	Abnormal morphology of female internal genitalia	5
1499	P35222	CTNB1	Catenin beta-1 (Beta-catenin)	HP:0000008	Abnormal morphology of female internal genitalia	6
2178	Q9HB96	FANCE	Fanconi anemia group E protein (Protein FACE)	HP:0000008	Abnormal morphology of female internal genitalia	7
84464	Q8IY92	SLX4	Structure-specific endonuclease subunit SLX4 (BTB/POZ domain-containing protein 12)	HP:0000008	Abnormal morphology of female internal genitalia	8
57697	Q8IYD8	FANCM	Fanconi anemia group M protein (Protein FACM) (EC 3.6.4.13) (ATP-dependent RNA helicase FANCM) (Fanconi anemia-associated polypeptide of 250 kDa) (FAAP250) (Protein Hef ortholog)	HP:0000008	Abnormal morphology of female internal genitalia	9
5980	O60673	REV3L	DNA polymerase zeta catalytic subunit (EC 2.7.7.7) (Protein reversionless 3-like) (REV3-like) (hREV3)	HP:0000008	Abnormal morphology of female internal genitalia	10
80233	Q0VG06	FP100	Fanconi anemia core complex-associated protein 100 (Fanconi anemia-associated protein of 100 kDa)	HP:0000008	Abnormal morphology of female internal genitalia	11
146956	Q96AY2	EME1	Crossover junction endonuclease EME1 (EC 3.1.22.-) (MMS4 homolog) (hMMS4)	HP:0000008	Abnormal morphology of female internal genitalia	12
80184	O15078	CE290	Centrosomal protein of 290 kDa (Cep290) (Bardet-Biedl syndrome 14 protein) (Cancer/testis antigen 87) (CT87) (Nephrocystin-6) (Tumor antigen se2-2)	HP:0000008	Abnormal morphology of female internal genitalia	13
26160	Q9UG01	IF172	Intraflagellar transport protein 172 homolog	HP:0000008	Abnormal morphology of female internal genitalia	14
190	P51843	NR0B1	Nuclear receptor subfamily 0 group B member 1 (DSS-AHC critical region on the X chromosome protein 1) (Nuclear receptor DAX-1)	HP:0000008	Abnormal morphology of female internal genitalia	15
91442	Q9BTP7	FAP24	Fanconi anemia core complex-associated protein 24 (Fanconi anemia-associated protein of 24 kDa)	HP:0000008	Abnormal morphology of female internal genitalia	16
197342	A4GXA9	EME2	Probable crossover junction endonuclease EME2 (EC 3.1.22.-)	HP:0000008	Abnormal morphology of female internal genitalia	17
6608	Q99835	SMO	Smoothened homolog (SMO) (Protein Gx)	HP:0000008	Abnormal morphology of female internal genitalia	18
5889	O43502	RA51C	DNA repair protein RAD51 homolog 3 (R51H3) (RAD51 homolog C) (RAD51-like protein 2)	HP:0000008	Abnormal morphology of female internal genitalia	19
3265	P01112	RASH	GTPase HRas (EC 3.6.5.2) (H-Ras-1) (Ha-Ras) (Transforming protein p21) (c-H-ras) (p21ras) [Cleaved into: GTPase HRas, N-terminally processed]	HP:0000008	Abnormal morphology of female internal genitalia	20
57545	Q9P2K1	C2D2A	Coiled-coil and C2 domain-containing protein 2A	HP:0000008	Abnormal morphology of female internal genitalia	21
6469	Q15465	SHH	Sonic hedgehog protein (SHH) (HHG-1) (Shh unprocessed N-terminal signaling and C-terminal autoprocessing domains) (ShhNC) [Cleaved into: Sonic hedgehog protein N-product (ShhN) (Shh N-terminal processed signaling domains) (ShhNp)]	HP:0000008	Abnormal morphology of female internal genitalia	22
51684	Q9UMX1	SUFU	Suppressor of fused homolog (SUFUH)	HP:0000008	Abnormal morphology of female internal genitalia	23
55120	Q9NW38	FANCL	E3 ubiquitin-protein ligase FANCL (EC 2.3.2.27) (Fanconi anemia group L protein) (Fanconi anemia-associated polypeptide of 43 kDa) (FAAP43) (RING-type E3 ubiquitin transferase FANCL)	HP:0000008	Abnormal morphology of female internal genitalia	24
2737	P10071	GLI3	Transcriptional activator GLI3 (GLI3 form of 190 kDa) (GLI3-190) (GLI3 full-length protein) (GLI3FL) [Cleaved into: Transcriptional repressor GLI3R (GLI3 C-terminally truncated form) (GLI3 form of 83 kDa) (GLI3-83)]	HP:0000008	Abnormal morphology of female internal genitalia	25
3845	P01116	RASK	GTPase KRas (EC 3.6.5.2) (K-Ras 2) (Ki-Ras) (c-K-ras) (c-Ki-ras) [Cleaved into: GTPase KRas, N-terminally processed]	HP:0000008	Abnormal morphology of female internal genitalia	26
7516	O43543	XRCC2	DNA repair protein XRCC2 (X-ray repair cross-complementing protein 2)	HP:0000008	Abnormal morphology of female internal genitalia	27
23322	Q68CZ1	FTM	Protein fantom (Nephrocystin-8) (RPGR-interacting protein 1-like protein) (RPGRIP1-like protein)	HP:0000008	Abnormal morphology of female internal genitalia	28
80010	Q9H9A7	RMI1	RecQ-mediated genome instability protein 1 (BLM-associated protein of 75 kDa) (BLAP75) (FAAP75)	HP:0000008	Abnormal morphology of female internal genitalia	29
91147	Q5HYA8	MKS3	Meckelin (Meckel syndrome type 3 protein) (Transmembrane protein 67)	HP:0000008	Abnormal morphology of female internal genitalia	30
56852	Q9NS91	RAD18	E3 ubiquitin-protein ligase RAD18 (EC 2.3.2.27) (Postreplication repair protein RAD18) (hHR18) (hRAD18) (RING finger protein 73) (RING-type E3 ubiquitin transferase RAD18)	HP:0000008	Abnormal morphology of female internal genitalia	31
2736	P10070	GLI2	Zinc finger protein GLI2 (GLI family zinc finger protein 2) (Tax helper protein)	HP:0000008	Abnormal morphology of female internal genitalia	32
11073	Q92547	TOPB1	DNA topoisomerase 2-binding protein 1 (DNA topoisomerase II-beta-binding protein 1) (TopBP1) (DNA topoisomerase II-binding protein 1)	HP:0000008	Abnormal morphology of female internal genitalia	33
672	P38398	BRCA1	Breast cancer type 1 susceptibility protein (EC 2.3.2.27) (RING finger protein 53) (RING-type E3 ubiquitin transferase BRCA1)	HP:0000008	Abnormal morphology of female internal genitalia	34
7157	P04637	P53	Cellular tumor antigen p53 (Antigen NY-CO-13) (Phosphoprotein p53) (Tumor suppressor p53)	HP:0000008	Abnormal morphology of female internal genitalia	35
2735	P08151	GLI1	Zinc finger protein GLI1 (Glioma-associated oncogene) (Oncogene GLI)	HP:0000008	Abnormal morphology of female internal genitalia	36
80198	Q96NY9	MUS81	Crossover junction endonuclease MUS81 (EC 3.1.22.-)	HP:0000008	Abnormal morphology of female internal genitalia	37
585	Q96RK4	BBS4	Bardet-Biedl syndrome 4 protein	HP:0000008	Abnormal morphology of female internal genitalia	38
472	Q13315	ATM	Serine-protein kinase ATM (EC 2.7.11.1) (Ataxia telangiectasia mutated) (A-T mutated)	HP:0000008	Abnormal morphology of female internal genitalia	39
261734	O75161	NPHP4	Nephrocystin-4 (Nephroretinin)	HP:0000008	Abnormal morphology of female internal genitalia	40
2188	Q9NPI8	FANCF	Fanconi anemia group F protein (Protein FACF)	HP:0000008	Abnormal morphology of female internal genitalia	41
4292	P40692	MLH1	DNA mismatch repair protein Mlh1 (MutL protein homolog 1)	HP:0000008	Abnormal morphology of female internal genitalia	42
8100	Q13099	IFT88	Intraflagellar transport protein 88 homolog (Recessive polycystic kidney disease protein Tg737 homolog) (Tetratricopeptide repeat protein 10) (TPR repeat protein 10)	HP:0000008	Abnormal morphology of female internal genitalia	43
207	P31749	AKT1	RAC-alpha serine/threonine-protein kinase (EC 2.7.11.1) (Protein kinase B) (PKB) (Protein kinase B alpha) (PKB alpha) (Proto-oncogene c-Akt) (RAC-PK-alpha)	HP:0000008	Abnormal morphology of female internal genitalia	44
583	Q9BXC9	BBS2	Bardet-Biedl syndrome 2 protein	HP:0000008	Abnormal morphology of female internal genitalia	45
84126	Q8WXE1	ATRIP	ATR-interacting protein (ATM and Rad3-related-interacting protein)	HP:0000008	Abnormal morphology of female internal genitalia	46
582	Q8NFJ9	BBS1	Bardet-Biedl syndrome 1 protein (BBS2-like protein 2)	HP:0000008	Abnormal morphology of female internal genitalia	47
5892	O75771	RA51D	DNA repair protein RAD51 homolog 4 (R51H3) (RAD51 homolog D) (RAD51-like protein 3) (TRAD)	HP:0000008	Abnormal morphology of female internal genitalia	48
83990	Q9BX63	FANCJ	Fanconi anemia group J protein (Protein FACJ) (EC 3.6.4.13) (ATP-dependent RNA helicase BRIP1) (BRCA1-associated C-terminal helicase 1) (BRCA1-interacting protein C-terminal helicase 1) (BRCA1-interacting protein 1)	HP:0000008	Abnormal morphology of female internal genitalia	49
2175	O15360	FANCA	Fanconi anemia group A protein (Protein FACA)	HP:0000008	Abnormal morphology of female internal genitalia	50
5884	O75943	RAD17	Cell cycle checkpoint protein RAD17 (hRad17) (RF-C/activator 1 homolog)	HP:0000008	Abnormal morphology of female internal genitalia	51
22909	Q9Y2M0	FAN1	Fanconi-associated nuclease 1 (EC 3.1.21.-) (EC 3.1.4.1) (FANCD2/FANCI-associated nuclease 1) (hFAN1) (Myotubularin-related protein 15)	HP:0000008	Abnormal morphology of female internal genitalia	52
5727	Q13635	PTC1	Protein patched homolog 1 (PTC) (PTC1)	HP:0000008	Abnormal morphology of female internal genitalia	53
2176	Q00597	FANCC	Fanconi anemia group C protein (Protein FACC)	HP:0000008	Abnormal morphology of female internal genitalia	54
4763	P21359	NF1	Neurofibromin (Neurofibromatosis-related protein NF-1) [Cleaved into: Neurofibromin truncated]	HP:0000008	Abnormal morphology of female internal genitalia	55
7517	O43542	XRCC3	DNA repair protein XRCC3 (X-ray repair cross-complementing protein 3)	HP:0000008	Abnormal morphology of female internal genitalia	56
55212	Q8IWZ6	BBS7	Bardet-Biedl syndrome 7 protein (BBS2-like protein 1)	HP:0000008	Abnormal morphology of female internal genitalia	57
51455	Q9UBZ9	REV1	DNA repair protein REV1 (EC 2.7.7.-) (Alpha integrin-binding protein 80) (AIBP80) (Rev1-like terminal deoxycytidyl transferase)	HP:0000008	Abnormal morphology of female internal genitalia	58
3364	O60921	HUS1	Checkpoint protein HUS1 (hHUS1)	HP:0000008	Abnormal morphology of female internal genitalia	59
374654	Q2M1P5	KIF7	Kinesin-like protein KIF7	HP:0000008	Abnormal morphology of female internal genitalia	60
2187	Q8NB91	FANCB	Fanconi anemia group B protein (Protein FACB) (Fanconi anemia-associated polypeptide of 95 kDa) (FAAP95)	HP:0000008	Abnormal morphology of female internal genitalia	61
5890	O15315	RA51B	DNA repair protein RAD51 homolog 2 (R51H2) (RAD51 homolog B) (Rad51B) (RAD51-like protein 1)	HP:0000008	Abnormal morphology of female internal genitalia	62
54903	Q9NXB0	MKS1	Meckel syndrome type 1 protein	HP:0000008	Abnormal morphology of female internal genitalia	63
4867	O15259	NPHP1	Nephrocystin-1 (Juvenile nephronophthisis 1 protein)	HP:0000008	Abnormal morphology of female internal genitalia	64
2189	O15287	FANCG	Fanconi anemia group G protein (Protein FACG) (DNA repair protein XRCC9)	HP:0000008	Abnormal morphology of female internal genitalia	65
1588	P11511	CP19A	Aromatase (EC 1.14.14.14) (CYPXIX) (Cytochrome P-450AROM) (Cytochrome P450 19A1) (Estrogen synthase)	HP:0000008	Abnormal morphology of female internal genitalia	66
1761	Q9Y5R6	DMRT1	Doublesex- and mab-3-related transcription factor 1 (DM domain expressed in testis protein 1)	HP:0000008	Abnormal morphology of female internal genitalia	67
545	Q13535	ATR	Serine/threonine-protein kinase ATR (EC 2.7.11.1) (Ataxia telangiectasia and Rad3-related protein) (FRAP-related protein 1)	HP:0000008	Abnormal morphology of female internal genitalia	68
4437	P20585	MSH3	DNA mismatch repair protein Msh3 (hMSH3) (Divergent upstream protein) (DUP) (Mismatch repair protein 1) (MRP1)	HP:0000008	Abnormal morphology of female internal genitalia	69
9937	Q6PJP8	DCR1A	DNA cross-link repair 1A protein (SNM1 homolog A) (hSNM1) (hSNM1A)	HP:0000008	Abnormal morphology of female internal genitalia	70
1111	O14757	CHK1	Serine/threonine-protein kinase Chk1 (EC 2.7.11.1) (CHK1 checkpoint homolog) (Cell cycle checkpoint kinase) (Checkpoint kinase-1)	HP:0000008	Abnormal morphology of female internal genitalia	71
57728	Q8NEZ3	WDR19	WD repeat-containing protein 19 (Intraflagellar transport 144 homolog)	HP:0000008	Abnormal morphology of female internal genitalia	72
2072	Q92889	XPF	DNA repair endonuclease XPF (EC 3.1.-.-) (DNA excision repair protein ERCC-4) (DNA repair protein complementing XP-F cells) (Xeroderma pigmentosum group F-complementing protein)	HP:0000008	Abnormal morphology of female internal genitalia	73
9786	Q9BVV6	TALD3	Protein TALPID3	HP:0000008	Abnormal morphology of female internal genitalia	74
79809	Q7Z4L5	TT21B	Tetratricopeptide repeat protein 21B (TPR repeat protein 21B) (Intraflagellar transport 139 homolog)	HP:0000008	Abnormal morphology of female internal genitalia	75
27130	Q9Y283	INVS	Inversin (Inversion of embryo turning homolog) (Nephrocystin-2)	HP:0000008	Abnormal morphology of female internal genitalia	76
5810	O60671	RAD1	Cell cycle checkpoint protein RAD1 (hRAD1) (EC 3.1.11.2) (DNA repair exonuclease rad1 homolog) (Rad1-like DNA damage checkpoint protein)	HP:0000008	Abnormal morphology of female internal genitalia	77
55215	Q9NVI1	FANCI	Fanconi anemia group I protein (Protein FACI)	HP:0000008	Abnormal morphology of female internal genitalia	78
2263	P21802	FGFR2	Fibroblast growth factor receptor 2 (FGFR-2) (EC 2.7.10.1) (K-sam) (KGFR) (Keratinocyte growth factor receptor) (CD antigen CD332)	HP:0000008	Abnormal morphology of female internal genitalia	79
7486	Q14191	WRN	Werner syndrome ATP-dependent helicase (EC 3.6.4.12) (DNA helicase, RecQ-like type 3) (RecQ3) (Exonuclease WRN) (EC 3.1.-.-) (RecQ protein-like 2)	HP:0000008	Abnormal morphology of female internal genitalia	80
9156	Q9UQ84	EXO1	Exonuclease 1 (hExo1) (EC 3.1.-.-) (Exonuclease I) (hExoI)	HP:0000008	Abnormal morphology of female internal genitalia	81
4851	P46531	NOTC1	Neurogenic locus notch homolog protein 1 (Notch 1) (hN1) (Translocation-associated notch protein TAN-1) [Cleaved into: Notch 1 extracellular truncation (NEXT); Notch 1 intracellular domain (NICD)]	HP:0000008	Abnormal morphology of female internal genitalia	82
6117	P27694	RFA1	Replication protein A 70 kDa DNA-binding subunit (RP-A p70) (Replication factor A protein 1) (RF-A protein 1) (Single-stranded DNA-binding protein) [Cleaved into: Replication protein A 70 kDa DNA-binding subunit, N-terminally processed]	HP:0000008	Abnormal morphology of female internal genitalia	83
2260	P11362	FGFR1	Fibroblast growth factor receptor 1 (FGFR-1) (EC 2.7.10.1) (Basic fibroblast growth factor receptor 1) (BFGFR) (bFGF-R-1) (Fms-like tyrosine kinase 2) (FLT-2) (N-sam) (Proto-oncogene c-Fgr) (CD antigen CD331)	HP:0000008	Abnormal morphology of female internal genitalia	84
7015	O14746	TERT	Telomerase reverse transcriptase (EC 2.7.7.49) (HEST2) (Telomerase catalytic subunit) (Telomerase-associated protein 2) (TP2)	HP:0000008	Abnormal morphology of female internal genitalia	85
90410	Q8IY31	IFT20	Intraflagellar transport protein 20 homolog (hIFT20)	HP:0000008	Abnormal morphology of female internal genitalia	86
5883	Q99638	RAD9A	Cell cycle checkpoint control protein RAD9A (hRAD9) (EC 3.1.11.2) (DNA repair exonuclease rad9 homolog A)	HP:0000008	Abnormal morphology of female internal genitalia	87
5893	P43351	RAD52	DNA repair protein RAD52 homolog	HP:0000008	Abnormal morphology of female internal genitalia	88
27031	Q7Z494	NPHP3	Nephrocystin-3	HP:0000008	Abnormal morphology of female internal genitalia	89
8481	O75665	OFD1	Oral-facial-digital syndrome 1 protein (Protein 71-7A)	HP:0000008	Abnormal morphology of female internal genitalia	90
2067	P07992	ERCC1	DNA excision repair protein ERCC-1	HP:0000008	Abnormal morphology of female internal genitalia	91
79583	Q9H6L2	TM231	Transmembrane protein 231	HP:0000008	Abnormal morphology of female internal genitalia	92
2956	P52701	MSH6	DNA mismatch repair protein Msh6 (hMSH6) (G/T mismatch-binding protein) (GTBP) (GTMBP) (MutS protein homolog 6) (MutS-alpha 160 kDa subunit) (p160)	HP:0000008	Abnormal morphology of female internal genitalia	93
84976	Q96F81	DISP1	Protein dispatched homolog 1	HP:0000008	Abnormal morphology of female internal genitalia	94
4089	Q13485	SMAD4	Mothers against decapentaplegic homolog 4 (MAD homolog 4) (Mothers against DPP homolog 4) (Deletion target in pancreatic carcinoma 4) (SMAD family member 4) (SMAD 4) (Smad4) (hSMAD4)	HP:0000008	Abnormal morphology of female internal genitalia	95
29089	Q9NPD8	UBE2T	Ubiquitin-conjugating enzyme E2 T (EC 2.3.2.23) (Cell proliferation-inducing gene 50 protein) (E2 ubiquitin-conjugating enzyme T) (Ubiquitin carrier protein T) (Ubiquitin-protein ligase T)	HP:0000008	Abnormal morphology of female internal genitalia	96
641	P54132	BLM	Bloom syndrome protein (EC 3.6.4.12) (DNA helicase, RecQ-like type 2) (RecQ2) (RecQ protein-like 3)	HP:0000008	Abnormal morphology of female internal genitalia	97
5932	Q99708	CTIP	DNA endonuclease RBBP8 (EC 3.1.-.-) (CtBP-interacting protein) (CtIP) (Retinoblastoma-binding protein 8) (RBBP-8) (Retinoblastoma-interacting protein and myosin-like) (RIM) (Sporulation in the absence of SPO11 protein 2 homolog) (SAE2)	HP:0000008	Abnormal morphology of female internal genitalia	98
8438	Q92698	RAD54	DNA repair and recombination protein RAD54-like (EC 3.6.4.12) (RAD54 homolog) (hHR54) (hRAD54)	HP:0000008	Abnormal morphology of female internal genitalia	99
1029	P42771	CDN2A	Cyclin-dependent kinase inhibitor 2A (Cyclin-dependent kinase 4 inhibitor A) (CDK4I) (Multiple tumor suppressor 1) (MTS-1) (p16-INK4a) (p16-INK4) (p16INK4A)	HP:0000008	Abnormal morphology of female internal genitalia	100
1583	P05108	CP11A	Cholesterol side-chain cleavage enzyme, mitochondrial (EC 1.14.15.6) (CYPXIA1) (Cholesterol desmolase) (Cytochrome P450 11A1) (Cytochrome P450(scc))	HP:0000008	Abnormal morphology of female internal genitalia	101
10459	Q9UI95	MD2L2	Mitotic spindle assembly checkpoint protein MAD2B (Mitotic arrest deficient 2-like protein 2) (MAD2-like protein 2) (REV7 homolog) (hREV7)	HP:0000008	Abnormal morphology of female internal genitalia	102
5979	P07949	RET	Proto-oncogene tyrosine-protein kinase receptor Ret (EC 2.7.10.1) (Cadherin family member 12) (Proto-oncogene c-Ret) [Cleaved into: Soluble RET kinase fragment; Extracellular cell-membrane anchored RET cadherin 120 kDa fragment]	HP:0000008	Abnormal morphology of female internal genitalia	103
27030	Q9UHC1	MLH3	DNA mismatch repair protein Mlh3 (MutL protein homolog 3)	HP:0000008	Abnormal morphology of female internal genitalia	104
25788	Q9Y620	RA54B	DNA repair and recombination protein RAD54B (EC 3.6.4.-) (RAD54 homolog B)	HP:0000008	Abnormal morphology of female internal genitalia	105
51098	Q9Y366	IFT52	Intraflagellar transport protein 52 homolog (Protein NGD5 homolog)	HP:0000008	Abnormal morphology of female internal genitalia	106
2516	Q13285	STF1	Steroidogenic factor 1 (SF-1) (STF-1) (hSF-1) (Adrenal 4-binding protein) (Fushi tarazu factor homolog 1) (Nuclear receptor subfamily 5 group A member 1) (Steroid hormone receptor Ad4BP)	HP:0000008	Abnormal morphology of female internal genitalia	107
79915	Q96QE3	ATAD5	ATPase family AAA domain-containing protein 5 (Chromosome fragility-associated gene 1 protein)	HP:0000008	Abnormal morphology of female internal genitalia	108
3981	P49917	DNLI4	DNA ligase 4 (EC 6.5.1.1) (DNA ligase IV) (Polydeoxyribonucleotide synthase [ATP] 4)	HP:0000008	Abnormal morphology of female internal genitalia	109
668	P58012	FOXL2	Forkhead box protein L2	HP:0000008	Abnormal morphology of female internal genitalia	110
166379	Q6ZW61	BBS12	Bardet-Biedl syndrome 12 protein	HP:0000008	Abnormal morphology of female internal genitalia	111
9742	Q96RY7	IF140	Intraflagellar transport protein 140 homolog (WD and tetratricopeptide repeats protein 2)	HP:0000008	Abnormal morphology of female internal genitalia	112
353497	Q7Z5Q5	DPOLN	DNA polymerase nu (EC 2.7.7.7)	HP:0000008	Abnormal morphology of female internal genitalia	113
4361	P49959	MRE11	Double-strand break repair protein MRE11 (EC 3.1.-.-) (Double-strand break repair protein MRE11A) (Meiotic recombination 11 homolog 1) (MRE11 homolog 1) (Meiotic recombination 11 homolog A) (MRE11 homolog A)	HP:0000008	Abnormal morphology of female internal genitalia	114
4609	P01106	MYC	Myc proto-oncogene protein (Class E basic helix-loop-helix protein 39) (bHLHe39) (Proto-oncogene c-Myc) (Transcription factor p64)	HP:0000008	Abnormal morphology of female internal genitalia	115
129880	Q8N3I7	BBS5	Bardet-Biedl syndrome 5 protein	HP:0000008	Abnormal morphology of female internal genitalia	116
200894	Q3SXY8	AR13B	ADP-ribosylation factor-like protein 13B (ADP-ribosylation factor-like protein 2-like 1) (ARL2-like protein 1)	HP:0000008	Abnormal morphology of female internal genitalia	117
11200	O96017	CHK2	Serine/threonine-protein kinase Chk2 (EC 2.7.11.1) (CHK2 checkpoint homolog) (Cds1 homolog) (Hucds1) (hCds1) (Checkpoint kinase 2)	HP:0000008	Abnormal morphology of female internal genitalia	118
50846	O43323	DHH	Desert hedgehog protein (DHH) (HHG-3) [Cleaved into: Desert hedgehog protein N-product; Desert hedgehog protein C-product]	HP:0000008	Abnormal morphology of female internal genitalia	119
3284	P26439	3BHS2	3 beta-hydroxysteroid dehydrogenase/Delta 5-->4-isomerase type 2 (3 beta-hydroxysteroid dehydrogenase/Delta 5-->4-isomerase type II) (3-beta-HSD II) (3-beta-HSD adrenal and gonadal type) [Includes: 3-beta-hydroxy-Delta(5)-steroid dehydrogenase (EC 1.1.1.145) (3-beta-hydroxy-5-ene steroid dehydrogenase) (Progesterone reductase); Steroid Delta-isomerase (EC 5.3.3.1) (Delta-5-3-ketosteroid isomerase…	HP:0000008	Abnormal morphology of female internal genitalia	120
348654	Q17RS7	GEN	Flap endonuclease GEN homolog 1 (EC 3.1.-.-)	HP:0000008	Abnormal morphology of female internal genitalia	121
3283	P14060	3BHS1	3 beta-hydroxysteroid dehydrogenase/Delta 5-->4-isomerase type 1 (3 beta-hydroxysteroid dehydrogenase/Delta 5-->4-isomerase type I) (3-beta-HSD I) (3-beta-hydroxy-5-ene steroid dehydrogenase) (3-beta-hydroxy-Delta(5)-steroid dehydrogenase) (EC 1.1.1.145) (3-beta-hydroxysteroid 3-dehydrogenase) (EC 1.1.1.270) (Delta-5-3-ketosteroid isomerase) (Dihydrotestosterone oxidoreductase) (EC 1.1.1.210) (St…	HP:0000008	Abnormal morphology of female internal genitalia	122
580	Q99728	BARD1	BRCA1-associated RING domain protein 1 (BARD-1) (EC 2.3.2.27) (RING-type E3 ubiquitin transferase BARD1)	HP:0000008	Abnormal morphology of female internal genitalia	123
10343	Q9NTG1	PKDRE	Polycystic kidney disease and receptor for egg jelly-related protein (PKD and REJ homolog)	HP:0000008	Abnormal morphology of female internal genitalia	124
51750	Q9NZ71	RTEL1	Regulator of telomere elongation helicase 1 (EC 3.6.4.12) (Novel helicase-like)	HP:0000008	Abnormal morphology of female internal genitalia	125
57599	Q8TAF3	WDR48	WD repeat-containing protein 48 (USP1-associated factor 1) (WD repeat endosomal protein) (p80)	HP:0000008	Abnormal morphology of female internal genitalia	126
2064	P04626	ERBB2	Receptor tyrosine-protein kinase erbB-2 (EC 2.7.10.1) (Metastatic lymph node gene 19 protein) (MLN 19) (Proto-oncogene Neu) (Proto-oncogene c-ErbB-2) (Tyrosine kinase-type cell surface receptor HER2) (p185erbB2) (CD antigen CD340)	HP:0000008	Abnormal morphology of female internal genitalia	127
6794	Q15831	STK11	Serine/threonine-protein kinase STK11 (EC 2.7.11.1) (Liver kinase B1) (LKB1) (hLKB1) (Renal carcinoma antigen NY-REN-19)	HP:0000008	Abnormal morphology of female internal genitalia	128
57560	Q9P2H3	IFT80	Intraflagellar transport protein 80 homolog (WD repeat-containing protein 56)	HP:0000008	Abnormal morphology of female internal genitalia	129
268	P03971	MIS	Muellerian-inhibiting factor (Anti-Muellerian hormone) (AMH) (Muellerian-inhibiting substance) (MIS)	HP:0000008	Abnormal morphology of female internal genitalia	130
55764	Q9HBG6	IF122	Intraflagellar transport protein 122 homolog (WD repeat-containing protein 10) (WD repeat-containing protein 140)	HP:0000008	Abnormal morphology of female internal genitalia	131
51057	O95876	FRITZ	WD repeat-containing and planar cell polarity effector protein fritz homolog (hFRTZ) (Bardet-Biedl syndrome 15 protein) (WD repeat-containing and planar cell polarity effector protein)	HP:0000008	Abnormal morphology of female internal genitalia	132
2261	P22607	FGFR3	Fibroblast growth factor receptor 3 (FGFR-3) (EC 2.7.10.1) (CD antigen CD333)	HP:0000008	Abnormal morphology of female internal genitalia	133
5426	Q07864	DPOE1	DNA polymerase epsilon catalytic subunit A (EC 2.7.7.7) (3'-5' exodeoxyribonuclease) (EC 3.1.11.-) (DNA polymerase II subunit A)	HP:0000008	Abnormal morphology of female internal genitalia	134
116028	Q96E14	RMI2	RecQ-mediated genome instability protein 2 (hRMI2) (BLM-associated protein of 18 kDa) (BLAP18)	HP:0000008	Abnormal morphology of female internal genitalia	135
8626	Q9H3D4	P63	Tumor protein 63 (p63) (Chronic ulcerative stomatitis protein) (CUSP) (Keratinocyte transcription factor KET) (Transformation-related protein 63) (TP63) (Tumor protein p73-like) (p73L) (p40) (p51)	HP:0000008	Abnormal morphology of female internal genitalia	136
27077	Q9UPM9	B9D1	B9 domain-containing protein 1 (MKS1-related protein 1)	HP:0000008	Abnormal morphology of female internal genitalia	137
2253	P55075	FGF8	Fibroblast growth factor 8 (FGF-8) (Androgen-induced growth factor) (AIGF) (Heparin-binding growth factor 8) (HBGF-8)	HP:0000008	Abnormal morphology of female internal genitalia	138
595	P24385	CCND1	G1/S-specific cyclin-D1 (B-cell lymphoma 1 protein) (BCL-1) (BCL-1 oncogene) (PRAD1 oncogene)	HP:0000008	Abnormal morphology of female internal genitalia	139
51259	Q9P0N5	TM216	Transmembrane protein 216	HP:0000008	Abnormal morphology of female internal genitalia	140
9401	O94761	RECQ4	ATP-dependent DNA helicase Q4 (EC 3.6.4.12) (DNA helicase, RecQ-like type 4) (RecQ4) (RTS) (RecQ protein-like 4)	HP:0000008	Abnormal morphology of female internal genitalia	141
6118	P15927	RFA2	Replication protein A 32 kDa subunit (RP-A p32) (Replication factor A protein 2) (RF-A protein 2) (Replication protein A 34 kDa subunit) (RP-A p34)	HP:0000008	Abnormal morphology of female internal genitalia	142
4286	O75030	MITF	Microphthalmia-associated transcription factor (Class E basic helix-loop-helix protein 32) (bHLHe32)	HP:0000008	Abnormal morphology of female internal genitalia	143
1956	P00533	EGFR	Epidermal growth factor receptor (EC 2.7.10.1) (Proto-oncogene c-ErbB-1) (Receptor tyrosine-protein kinase erbB-1)	HP:0000008	Abnormal morphology of female internal genitalia	144
3480	P08069	IGF1R	Insulin-like growth factor 1 receptor (EC 2.7.10.1) (Insulin-like growth factor I receptor) (IGF-I receptor) (CD antigen CD221) [Cleaved into: Insulin-like growth factor 1 receptor alpha chain; Insulin-like growth factor 1 receptor beta chain]	HP:0000008	Abnormal morphology of female internal genitalia	145
367	P10275	ANDR	Androgen receptor (Dihydrotestosterone receptor) (Nuclear receptor subfamily 3 group C member 4)	HP:0000008	Abnormal morphology of female internal genitalia	146
1763	P51530	DNA2	DNA replication ATP-dependent helicase/nuclease DNA2 (hDNA2) (DNA replication ATP-dependent helicase-like homolog) [Includes: DNA replication nuclease DNA2 (EC 3.1.-.-); DNA replication ATP-dependent helicase DNA2 (EC 3.6.4.12)]	HP:0000008	Abnormal morphology of female internal genitalia	147
10806	Q86SQ7	SDCG8	Serologically defined colon cancer antigen 8 (Antigen NY-CO-8) (Centrosomal colon cancer autoantigen protein) (hCCCAP)	HP:0000008	Abnormal morphology of female internal genitalia	148
6662	P48436	SOX9	Transcription factor SOX-9	HP:0000008	Abnormal morphology of female internal genitalia	149
4436	P43246	MSH2	DNA mismatch repair protein Msh2 (hMSH2) (MutS protein homolog 2)	HP:0000008	Abnormal morphology of female internal genitalia	150
25836	Q6KC79	NIPBL	Nipped-B-like protein (Delangin) (SCC2 homolog)	HP:0000009	Functional abnormality of the bladder	1
80208	Q96JI7	SPTCS	Spatacsin (Colorectal carcinoma-associated protein) (Spastic paraplegia 11 protein)	HP:0000009	Functional abnormality of the bladder	2
2186	Q12830	BPTF	Nucleosome-remodeling factor subunit BPTF (Bromodomain and PHD finger-containing transcription factor) (Fetal Alz-50 clone 1 protein) (Fetal Alzheimer antigen)	HP:0000009	Functional abnormality of the bladder	3
57680	Q9HCK8	CHD8	Chromodomain-helicase-DNA-binding protein 8 (CHD-8) (EC 3.6.4.12) (ATP-dependent helicase CHD8) (Helicase with SNF2 domain 1)	HP:0000009	Functional abnormality of the bladder	4
58508	Q8NEZ4	KMT2C	Histone-lysine N-methyltransferase 2C (Lysine N-methyltransferase 2C) (EC 2.1.1.354) (Homologous to ALR protein) (Myeloid/lymphoid or mixed-lineage leukemia protein 3)	HP:0000009	Functional abnormality of the bladder	5
55870	Q9NR48	ASH1L	Histone-lysine N-methyltransferase ASH1L (EC 2.1.1.359) (EC 2.1.1.367) (ASH1-like protein) (huASH1) (Absent small and homeotic disks protein 1 homolog) (Lysine N-methyltransferase 2H)	HP:0000009	Functional abnormality of the bladder	6
8085	O14686	KMT2D	Histone-lysine N-methyltransferase 2D (Lysine N-methyltransferase 2D) (EC 2.1.1.354) (ALL1-related protein) (Myeloid/lymphoid or mixed-lineage leukemia protein 2)	HP:0000009	Functional abnormality of the bladder	7
9757	Q9UMN6	KMT2B	Histone-lysine N-methyltransferase 2B (Lysine N-methyltransferase 2B) (EC 2.1.1.354) (Myeloid/lymphoid or mixed-lineage leukemia protein 4) (Trithorax homolog 2) (WW domain-binding protein 7) (WBP-7)	HP:0000009	Functional abnormality of the bladder	8
26278	Q9NZJ4	SACS	Sacsin (DnaJ homolog subfamily C member 29) (DNAJC29)	HP:0000009	Functional abnormality of the bladder	9
547	Q12756	KIF1A	Kinesin-like protein KIF1A (Axonal transporter of synaptic vesicles) (Microtubule-based motor KIF1A) (Unc-104- and KIF1A-related protein) (hUnc-104)	HP:0000009	Functional abnormality of the bladder	10
9895	O15040	TCPR2	Tectonin beta-propeller repeat-containing protein 2 (WD repeat-containing protein KIAA0329/KIAA0297)	HP:0000009	Functional abnormality of the bladder	11
57492	Q8NFD5	ARI1B	AT-rich interactive domain-containing protein 1B (ARID domain-containing protein 1B) (BRG1-associated factor 250b) (BAF250B) (BRG1-binding protein hELD/OSA1) (Osa homolog 2) (hOsa2) (p250R)	HP:0000009	Functional abnormality of the bladder	12
9968	Q93074	MED12	Mediator of RNA polymerase II transcription subunit 12 (Activator-recruited cofactor 240 kDa component) (ARC240) (CAG repeat protein 45) (Mediator complex subunit 12) (OPA-containing protein) (Thyroid hormone receptor-associated protein complex 230 kDa component) (Trap230) (Trinucleotide repeat-containing gene 11 protein)	HP:0000009	Functional abnormality of the bladder	13
2332	Q06787	FMR1	Synaptic functional regulator FMR1 (Fragile X mental retardation protein 1) (FMRP) (Protein FMR-1)	HP:0000009	Functional abnormality of the bladder	14
23389	Q71F56	MD13L	Mediator of RNA polymerase II transcription subunit 13-like (Mediator complex subunit 13-like) (Thyroid hormone receptor-associated protein 2) (Thyroid hormone receptor-associated protein complex 240 kDa component-like)	HP:0000009	Functional abnormality of the bladder	15
1387	Q92793	CBP	CREB-binding protein (Histone lysine acetyltransferase CREBBP) (EC 2.3.1.48) (Protein-lysine acetyltransferase CREBBP) (EC 2.3.1.-)	HP:0000009	Functional abnormality of the bladder	16
23067	Q9UPS6	SET1B	Histone-lysine N-methyltransferase SETD1B (EC 2.1.1.354) (Lysine N-methyltransferase 2G) (SET domain-containing protein 1B) (hSET1B)	HP:0000009	Functional abnormality of the bladder	17
6311	Q99700	ATX2	Ataxin-2 (Spinocerebellar ataxia type 2 protein) (Trinucleotide repeat-containing gene 13 protein)	HP:0000009	Functional abnormality of the bladder	18
3798	Q12840	KIF5A	Kinesin heavy chain isoform 5A (Kinesin heavy chain neuron-specific 1) (Neuronal kinesin heavy chain) (NKHC)	HP:0000009	Functional abnormality of the bladder	19
9739	O15047	SET1A	Histone-lysine N-methyltransferase SETD1A (EC 2.1.1.354) (Lysine N-methyltransferase 2F) (SET domain-containing protein 1A) (hSET1A) (Set1/Ash2 histone methyltransferase complex subunit SET1)	HP:0000009	Functional abnormality of the bladder	20
23503	Q68DK2	ZFY26	Zinc finger FYVE domain-containing protein 26 (FYVE domain-containing centrosomal protein) (FYVE-CENT) (Spastizin)	HP:0000009	Functional abnormality of the bladder	21
3064	P42858	HD	Huntingtin (Huntington disease protein) (HD protein) [Cleaved into: Huntingtin, myristoylated N-terminal fragment]	HP:0000009	Functional abnormality of the bladder	22
4287	P54252	ATX3	Ataxin-3 (EC 3.4.19.12) (Machado-Joseph disease protein 1) (Spinocerebellar ataxia type 3 protein)	HP:0000009	Functional abnormality of the bladder	23
8295	Q9Y4A5	TRRAP	Transformation/transcription domain-associated protein (350/400 kDa PCAF-associated factor) (PAF350/400) (STAF40) (Tra1 homolog)	HP:0000009	Functional abnormality of the bladder	24
4204	P51608	MECP2	Methyl-CpG-binding protein 2 (MeCp-2 protein) (MeCp2)	HP:0000009	Functional abnormality of the bladder	25
10908	Q8IY17	PLPL6	Patatin-like phospholipase domain-containing protein 6 (EC 3.1.1.5) (Neuropathy target esterase)	HP:0000009	Functional abnormality of the bladder	26
9909	O75064	DEN4B	DENN domain-containing protein 4B	HP:0000009	Functional abnormality of the bladder	27
64324	Q96L73	NSD1	Histone-lysine N-methyltransferase, H3 lysine-36 specific (EC 2.1.1.357) (Androgen receptor coactivator 267 kDa protein) (Androgen receptor-associated protein of 267 kDa) (H3-K36-HMTase) (Lysine N-methyltransferase 3B) (Nuclear receptor-binding SET domain-containing protein 1) (NR-binding SET domain-containing protein)	HP:0000009	Functional abnormality of the bladder	28
2033	Q09472	EP300	Histone acetyltransferase p300 (p300 HAT) (EC 2.3.1.48) (E1A-associated protein p300) (Histone butyryltransferase p300) (EC 2.3.1.-) (Histone crotonyltransferase p300) (EC 2.3.1.-) (Protein 2-hydroxyisobutyryltransferase p300) (EC 2.3.1.-) (Protein lactyltransferas p300) (EC 2.3.1.-) (Protein propionyltransferase p300) (EC 2.3.1.-)	HP:0000009	Functional abnormality of the bladder	29
546	P46100	ATRX	Transcriptional regulator ATRX (EC 3.6.4.12) (ATP-dependent helicase ATRX) (X-linked helicase II) (X-linked nuclear protein) (XNP) (Znf-HX)	HP:0000009	Functional abnormality of the bladder	30
4747	P07196	NFL	Neurofilament light polypeptide (NF-L) (68 kDa neurofilament protein) (Neurofilament triplet L protein)	HP:0000009	Functional abnormality of the bladder	31
29072	Q9BYW2	SETD2	Histone-lysine N-methyltransferase SETD2 (EC 2.1.1.359) (HIF-1) (Huntingtin yeast partner B) (Huntingtin-interacting protein 1) (HIP-1) (Huntingtin-interacting protein B) (Lysine N-methyltransferase 3A) (Protein-lysine N-methyltransferase SETD2) (EC 2.1.1.-) (SET domain-containing protein 2) (hSET2) (p231HBP)	HP:0000009	Functional abnormality of the bladder	32
55209	Q9C0A6	SETD5	Histone-lysine N-methyltransferase SETD5 (EC 2.1.1.359) (EC 2.1.1.367) (SET domain-containing protein 5)	HP:0000009	Functional abnormality of the bladder	33
8289	O14497	ARI1A	AT-rich interactive domain-containing protein 1A (ARID domain-containing protein 1A) (B120) (BRG1-associated factor 250) (BAF250) (BRG1-associated factor 250a) (BAF250A) (Osa homolog 1) (hOSA1) (SWI-like protein) (SWI/SNF complex protein p270) (SWI/SNF-related, matrix-associated, actin-dependent regulator of chromatin subfamily F member 1) (hELD)	HP:0000009	Functional abnormality of the bladder	34
196528	Q68CP9	ARID2	AT-rich interactive domain-containing protein 2 (ARID domain-containing protein 2) (BRG1-associated factor 200) (BAF200) (Zinc finger protein with activation potential) (Zipzap/p200)	HP:0000009	Functional abnormality of the bladder	35
9907	O43299	AP5Z1	AP-5 complex subunit zeta-1 (Adaptor-related protein complex 5 zeta subunit) (Zeta5)	HP:0000009	Functional abnormality of the bladder	36
25942	Q96ST3	SIN3A	Paired amphipathic helix protein Sin3a (Histone deacetylase complex subunit Sin3a) (Transcriptional corepressor Sin3a)	HP:0000009	Functional abnormality of the bladder	37
6597	P51532	SMCA4	Transcription activator BRG1 (EC 3.6.4.-) (ATP-dependent helicase SMARCA4) (BRG1-associated factor 190A) (BAF190A) (Mitotic growth and transcription activator) (Protein BRG-1) (Protein brahma homolog 1) (SNF2-beta) (SWI/SNF-related matrix-associated actin-dependent regulator of chromatin subfamily A member 4)	HP:0000009	Functional abnormality of the bladder	38
57030	Q9P2U7	VGLU1	Vesicular glutamate transporter 1 (VGluT1) (Brain-specific Na(+)-dependent inorganic phosphate cotransporter) (Solute carrier family 17 member 7)	HP:0000009	Functional abnormality of the bladder	39
50944	Q9Y566	SHAN1	SH3 and multiple ankyrin repeat domains protein 1 (Shank1) (Somatostatin receptor-interacting protein) (SSTR-interacting protein) (SSTRIP)	HP:0000009	Functional abnormality of the bladder	40
23126	Q7Z3K3	POGZ	Pogo transposable element with ZNF domain (Suppressor of hairy wing homolog 5) (Zinc finger protein 280E) (Zinc finger protein 635)	HP:0000009	Functional abnormality of the bladder	41
26580	Q96G97	BSCL2	Seipin (Bernardinelli-Seip congenital lipodystrophy type 2 protein)	HP:0000009	Functional abnormality of the bladder	42
4297	Q03164	KMT2A	Histone-lysine N-methyltransferase 2A (Lysine N-methyltransferase 2A) (EC 2.1.1.354) (ALL-1) (CXXC-type zinc finger protein 7) (Myeloid/lymphoid or mixed-lineage leukemia) (Myeloid/lymphoid or mixed-lineage leukemia protein 1) (Trithorax-like protein) (Zinc finger protein HRX) [Cleaved into: MLL cleavage product N320 (N-terminal cleavage product of 320 kDa) (p320); MLL cleavage product C180 (C-te…	HP:0000009	Functional abnormality of the bladder	43
11083	Q9BTC0	DIDO1	Death-inducer obliterator 1 (DIO-1) (hDido1) (Death-associated transcription factor 1) (DATF-1)	HP:0000009	Functional abnormality of the bladder	44
23309	O75182	SIN3B	Paired amphipathic helix protein Sin3b (Histone deacetylase complex subunit Sin3b) (Transcriptional corepressor Sin3b)	HP:0000009	Functional abnormality of the bladder	45
55193	Q86U86	PB1	Protein polybromo-1 (hPB1) (BRG1-associated factor 180) (BAF180) (Polybromo-1D)	HP:0000009	Functional abnormality of the bladder	46
4744	P12036	NFH	Neurofilament heavy polypeptide (NF-H) (200 kDa neurofilament protein) (Neurofilament triplet H protein)	HP:0000009	Functional abnormality of the bladder	47
80205	Q3L8U1	CHD9	Chromodomain-helicase-DNA-binding protein 9 (CHD-9) (EC 3.6.4.12) (ATP-dependent helicase CHD9) (Chromatin-related mesenchymal modulator) (CReMM) (Chromatin-remodeling factor CHROM1) (Kismet homolog 2) (PPAR-alpha-interacting complex protein 320 kDa) (Peroxisomal proliferator-activated receptor A-interacting complex 320 kDa protein)	HP:0000009	Functional abnormality of the bladder	48
6683	Q9UBP0	SPAST	Spastin (EC 5.6.1.1) (Spastic paraplegia 4 protein)	HP:0000009	Functional abnormality of the bladder	49
3054	P51610	HCFC1	Host cell factor 1 (HCF) (HCF-1) (C1 factor) (CFF) (VCAF) (VP16 accessory protein) [Cleaved into: HCF N-terminal chain 1; HCF N-terminal chain 2; HCF N-terminal chain 3; HCF N-terminal chain 4; HCF N-terminal chain 5; HCF N-terminal chain 6; HCF C-terminal chain 1; HCF C-terminal chain 2; HCF C-terminal chain 3; HCF C-terminal chain 4; HCF C-terminal chain 5; HCF C-terminal chain 6]	HP:0000009	Functional abnormality of the bladder	50
6326	Q99250	SCN2A	Sodium channel protein type 2 subunit alpha (HBSC II) (Sodium channel protein brain II subunit alpha) (Sodium channel protein type II subunit alpha) (Voltage-gated sodium channel subunit alpha Nav1.2)	HP:0000009	Functional abnormality of the bladder	51
57165	Q5T442	CXG2	Gap junction gamma-2 protein (Connexin-46.6) (Cx46.6) (Connexin-47) (Cx47) (Gap junction alpha-12 protein)	HP:0000009	Functional abnormality of the bladder	52
1995	Q14576	ELAV3	ELAV-like protein 3 (Hu-antigen C) (HuC) (Paraneoplastic cerebellar degeneration-associated antigen) (Paraneoplastic limbic encephalitis antigen 21)	HP:0000009	Functional abnormality of the bladder	53
9611	O75376	NCOR1	Nuclear receptor corepressor 1 (N-CoR) (N-CoR1)	HP:0000009	Functional abnormality of the bladder	54
6595	P51531	SMCA2	Probable global transcription activator SNF2L2 (EC 3.6.4.-) (ATP-dependent helicase SMARCA2) (BRG1-associated factor 190B) (BAF190B) (Protein brahma homolog) (hBRM) (SNF2-alpha) (SWI/SNF-related matrix-associated actin-dependent regulator of chromatin subfamily A member 2)	HP:0000009	Functional abnormality of the bladder	55
26040	Q9Y6X0	SETBP	SET-binding protein (SEB)	HP:0000009	Functional abnormality of the bladder	56
6594	P28370	SMCA1	Probable global transcription activator SNF2L1 (EC 3.6.4.-) (ATP-dependent helicase SMARCA1) (Nucleosome-remodeling factor subunit SNF2L) (SWI/SNF-related matrix-associated actin-dependent regulator of chromatin subfamily A member 1)	HP:0000009	Functional abnormality of the bladder	57
79813	Q9H9B1	EHMT1	Histone-lysine N-methyltransferase EHMT1 (EC 2.1.1.-) (Euchromatic histone-lysine N-methyltransferase 1) (Eu-HMTase1) (G9a-like protein 1) (GLP) (GLP1) (Histone H3-K9 methyltransferase 5) (H3-K9-HMTase 5) (Lysine N-methyltransferase 1D)	HP:0000009	Functional abnormality of the bladder	58
9969	Q9UHV7	MED13	Mediator of RNA polymerase II transcription subunit 13 (Activator-recruited cofactor 250 kDa component) (ARC250) (Mediator complex subunit 13) (Thyroid hormone receptor-associated protein 1) (Thyroid hormone receptor-associated protein complex 240 kDa component) (Trap240) (Vitamin D3 receptor-interacting protein complex component DRIP250) (DRIP250)	HP:0000009	Functional abnormality of the bladder	59
9612	Q9Y618	NCOR2	Nuclear receptor corepressor 2 (N-CoR2) (CTG repeat protein 26) (SMAP270) (Silencing mediator of retinoic acid and thyroid hormone receptor) (SMRT) (T3 receptor-associating factor) (TRAC) (Thyroid-, retinoic-acid-receptor-associated corepressor)	HP:0000009	Functional abnormality of the bladder	60
55904	Q8IZD2	KMT2E	Inactive histone-lysine N-methyltransferase 2E (Inactive lysine N-methyltransferase 2E) (Myeloid/lymphoid or mixed-lineage leukemia protein 5)	HP:0000009	Functional abnormality of the bladder	61
1105	O14646	CHD1	Chromodomain-helicase-DNA-binding protein 1 (CHD-1) (EC 3.6.4.12) (ATP-dependent helicase CHD1)	HP:0000009	Functional abnormality of the bladder	62
1107	Q12873	CHD3	Chromodomain-helicase-DNA-binding protein 3 (CHD-3) (EC 3.6.4.12) (ATP-dependent helicase CHD3) (Mi-2 autoantigen 240 kDa protein) (Mi2-alpha) (Zinc finger helicase) (hZFH)	HP:0000009	Functional abnormality of the bladder	63
3065	Q13547	HDAC1	Histone deacetylase 1 (HD1) (EC 3.5.1.98)	HP:0000009	Functional abnormality of the bladder	64
8242	P41229	KDM5C	Lysine-specific demethylase 5C (EC 1.14.11.67) (Histone demethylase JARID1C) (Jumonji/ARID domain-containing protein 1C) (Protein SmcX) (Protein Xe169) ([histone H3]-trimethyl-L-lysine(4) demethylase 5C)	HP:0000009	Functional abnormality of the bladder	65
64844	Q9H992	MARH7	E3 ubiquitin-protein ligase MARCHF7 (EC 2.3.2.27) (Axotrophin) (Membrane-associated RING finger protein 7) (Membrane-associated RING-CH protein VII) (MARCH-VII) (RING finger protein 177) (RING-type E3 ubiquitin transferase MARCHF7)	HP:0000009	Functional abnormality of the bladder	66
2571	Q99259	DCE1	Glutamate decarboxylase 1 (EC 4.1.1.15) (67 kDa glutamic acid decarboxylase) (GAD-67) (Glutamate decarboxylase 67 kDa isoform)	HP:0000009	Functional abnormality of the bladder	67
51412	O94805	ACL6B	Actin-like protein 6B (53 kDa BRG1-associated factor B) (Actin-related protein Baf53b) (ArpNalpha) (BRG1-associated factor 53B) (BAF53B)	HP:0000009	Functional abnormality of the bladder	68
57634	Q96L91	EP400	E1A-binding protein p400 (EC 3.6.4.-) (CAG repeat protein 32) (Domino homolog) (hDomino) (Trinucleotide repeat-containing gene 12 protein) (p400 kDa SWI2/SNF2-related protein)	HP:0000009	Functional abnormality of the bladder	69
9044	O14981	BTAF1	TATA-binding protein-associated factor 172 (EC 3.6.4.-) (ATP-dependent helicase BTAF1) (B-TFIID transcription factor-associated 170 kDa subunit) (TAF(II)170) (TBP-associated factor 172) (TAF-172)	HP:0000009	Functional abnormality of the bladder	70
4137	P10636	TAU	Microtubule-associated protein tau (Neurofibrillary tangle protein) (Paired helical filament-tau) (PHF-tau)	HP:0000009	Functional abnormality of the bladder	71
9070	Q9UBL3	ASH2L	Set1/Ash2 histone methyltransferase complex subunit ASH2 (ASH2-like protein)	HP:0000009	Functional abnormality of the bladder	72
55636	Q9P2D1	CHD7	Chromodomain-helicase-DNA-binding protein 7 (CHD-7) (EC 3.6.4.12) (ATP-dependent helicase CHD7)	HP:0000009	Functional abnormality of the bladder	73
23512	Q15022	SUZ12	Polycomb protein SUZ12 (Chromatin precipitated E2F target 9 protein) (ChET 9 protein) (Joined to JAZF1 protein) (Suppressor of zeste 12 protein homolog)	HP:0000009	Functional abnormality of the bladder	74
23431	Q9UPM8	AP4E1	AP-4 complex subunit epsilon-1 (AP-4 adaptor complex subunit epsilon) (Adaptor-related protein complex 4 subunit epsilon-1) (Epsilon subunit of AP-4) (Epsilon-adaptin)	HP:0000009	Functional abnormality of the bladder	75
140679	Q9H598	VIAAT	Vesicular inhibitory amino acid transporter (GABA and glycine transporter) (Solute carrier family 32 member 1) (Vesicular GABA transporter) (hVIAAT)	HP:0000009	Functional abnormality of the bladder	76
8831	Q96PV0	SYGP1	Ras/Rap GTPase-activating protein SynGAP (Neuronal RasGAP) (Synaptic Ras GTPase-activating protein 1) (Synaptic Ras-GAP 1)	HP:0000009	Functional abnormality of the bladder	77
7175	P12270	TPR	Nucleoprotein TPR (Megator) (NPC-associated intranuclear protein) (Translocated promoter region protein)	HP:0000009	Functional abnormality of the bladder	78
8573	O14936	CSKP	Peripheral plasma membrane protein CASK (hCASK) (EC 2.7.11.1) (Calcium/calmodulin-dependent serine protein kinase) (Protein lin-2 homolog)	HP:0000009	Functional abnormality of the bladder	79
55252	Q76L83	ASXL2	Putative Polycomb group protein ASXL2 (Additional sex combs-like protein 2)	HP:0000009	Functional abnormality of the bladder	80
10381	Q13509	TBB3	Tubulin beta-3 chain (Tubulin beta-4 chain) (Tubulin beta-III)	HP:0000009	Functional abnormality of the bladder	81
6622	P37840	SYUA	Alpha-synuclein (Non-A beta component of AD amyloid) (Non-A4 component of amyloid precursor) (NACP)	HP:0000009	Functional abnormality of the bladder	82
6601	Q8TAQ2	SMRC2	SWI/SNF complex subunit SMARCC2 (BRG1-associated factor 170) (BAF170) (SWI/SNF complex 170 kDa subunit) (SWI/SNF-related matrix-associated actin-dependent regulator of chromatin subfamily C member 2)	HP:0000009	Functional abnormality of the bladder	83
2146	Q15910	EZH2	Histone-lysine N-methyltransferase EZH2 (EC 2.1.1.356) (ENX-1) (Enhancer of zeste homolog 2) (Lysine N-methyltransferase 6)	HP:0000009	Functional abnormality of the bladder	84
51366	O95071	UBR5	E3 ubiquitin-protein ligase UBR5 (EC 2.3.2.26) (E3 ubiquitin-protein ligase, HECT domain-containing 1) (HECT-type E3 ubiquitin transferase UBR5) (Hyperplastic discs protein homolog) (hHYD) (Progestin-induced protein)	HP:0000009	Functional abnormality of the bladder	85
22941	Q9UPX8	SHAN2	SH3 and multiple ankyrin repeat domains protein 2 (Shank2) (Cortactin-binding protein 1) (CortBP1) (Proline-rich synapse-associated protein 1)	HP:0000009	Functional abnormality of the bladder	86
54832	Q709C8	VP13C	Vacuolar protein sorting-associated protein 13C	HP:0000009	Functional abnormality of the bladder	87
55777	Q9P267	MBD5	Methyl-CpG-binding domain protein 5 (Methyl-CpG-binding protein MBD5)	HP:0000009	Functional abnormality of the bladder	88
2890	P42261	GRIA1	Glutamate receptor 1 (GluR-1) (AMPA-selective glutamate receptor 1) (GluR-A) (GluR-K1) (Glutamate receptor ionotropic, AMPA 1) (GluA1)	HP:0000009	Functional abnormality of the bladder	89
6792	O76039	CDKL5	Cyclin-dependent kinase-like 5 (EC 2.7.11.22) (Serine/threonine-protein kinase 9)	HP:0000009	Functional abnormality of the bladder	90
10919	Q96KQ7	EHMT2	Histone-lysine N-methyltransferase EHMT2 (EC 2.1.1.-) (Euchromatic histone-lysine N-methyltransferase 2) (HLA-B-associated transcript 8) (Histone H3-K9 methyltransferase 3) (H3-K9-HMTase 3) (Lysine N-methyltransferase 1C) (Protein G9a)	HP:0000009	Functional abnormality of the bladder	91
80816	Q9C0F0	ASXL3	Putative Polycomb group protein ASXL3 (Additional sex combs-like protein 3)	HP:0000009	Functional abnormality of the bladder	92
10847	Q6ZRS2	SRCAP	Helicase SRCAP (EC 3.6.4.-) (Domino homolog 2) (Snf2-related CBP activator)	HP:0000009	Functional abnormality of the bladder	93
10524	Q92993	KAT5	Histone acetyltransferase KAT5 (EC 2.3.1.48) (60 kDa Tat-interactive protein) (Tip60) (Histone acetyltransferase HTATIP) (HIV-1 Tat interactive protein) (Lysine acetyltransferase 5) (cPLA(2)-interacting protein)	HP:0000009	Functional abnormality of the bladder	94
1996	P26378	ELAV4	ELAV-like protein 4 (Hu-antigen D) (HuD) (Paraneoplastic encephalomyelitis antigen HuD)	HP:0000009	Functional abnormality of the bladder	95
51742	Q4LE39	ARI4B	AT-rich interactive domain-containing protein 4B (ARID domain-containing protein 4B) (180 kDa Sin3-associated polypeptide) (Sin3-associated polypeptide p180) (Breast cancer-associated antigen BRCAA1) (Histone deacetylase complex subunit SAP180) (Retinoblastoma-binding protein 1-like 1)	HP:0000009	Functional abnormality of the bladder	96
84679	Q96T83	SL9A7	Sodium/hydrogen exchanger 7 (Na(+)/H(+) exchanger 7) (NHE-7) (Solute carrier family 9 member 7)	HP:0000009	Functional abnormality of the bladder	97
7403	O15550	KDM6A	Lysine-specific demethylase 6A (EC 1.14.11.68) (Histone demethylase UTX) (Ubiquitously-transcribed TPR protein on the X chromosome) (Ubiquitously-transcribed X chromosome tetratricopeptide repeat protein) ([histone H3]-trimethyl-L-lysine(27) demethylase 6A)	HP:0000009	Functional abnormality of the bladder	98
2572	Q05329	DCE2	Glutamate decarboxylase 2 (EC 4.1.1.15) (65 kDa glutamic acid decarboxylase) (GAD-65) (Glutamate decarboxylase 65 kDa isoform)	HP:0000009	Functional abnormality of the bladder	99
440686	Q5TEC6	H3PS2	Histone HIST2H3PS2	HP:0000009	Functional abnormality of the bladder	100
9897	Q12768	WASC5	WASH complex subunit 5 (Strumpellin) (WASH complex subunit strumpellin)	HP:0000009	Functional abnormality of the bladder	101
1108	Q14839	CHD4	Chromodomain-helicase-DNA-binding protein 4 (CHD-4) (EC 3.6.4.12) (ATP-dependent helicase CHD4) (Mi-2 autoantigen 218 kDa protein) (Mi2-beta)	HP:0000009	Functional abnormality of the bladder	102
6942	Q9UGU0	TCF20	Transcription factor 20 (TCF-20) (Nuclear factor SPBP) (Protein AR1) (Stromelysin-1 PDGF-responsive element-binding protein) (SPRE-binding protein)	HP:0000009	Functional abnormality of the bladder	103
2891	P42262	GRIA2	Glutamate receptor 2 (GluR-2) (AMPA-selective glutamate receptor 2) (GluR-B) (GluR-K2) (Glutamate receptor ionotropic, AMPA 2) (GluA2)	HP:0000009	Functional abnormality of the bladder	104
6598	Q12824	SNF5	SWI/SNF-related matrix-associated actin-dependent regulator of chromatin subfamily B member 1 (BRG1-associated factor 47) (BAF47) (Integrase interactor 1 protein) (SNF5 homolog) (hSNF5)	HP:0000009	Functional abnormality of the bladder	105
84629	O15417	TNC18	Trinucleotide repeat-containing gene 18 protein (Long CAG trinucleotide repeat-containing gene 79 protein)	HP:0000009	Functional abnormality of the bladder	106
6616	P60880	SNP25	Synaptosomal-associated protein 25 (SNAP-25) (Super protein) (SUP) (Synaptosomal-associated 25 kDa protein)	HP:0000009	Functional abnormality of the bladder	107
6305	O95248	MTMR5	Myotubularin-related protein 5 (Inactive phosphatidylinositol 3-phosphatase 5) (SET-binding factor 1) (Sbf1)	HP:0000009	Functional abnormality of the bladder	108
11154	Q9Y587	AP4S1	AP-4 complex subunit sigma-1 (AP-4 adaptor complex subunit sigma-1) (Adaptor-related protein complex 4 subunit sigma-1) (Sigma-1 subunit of AP-4) (Sigma-4-adaptin) (Sigma4-adaptin)	HP:0000009	Functional abnormality of the bladder	109
3066	Q92769	HDAC2	Histone deacetylase 2 (HD2) (EC 3.5.1.98)	HP:0000009	Functional abnormality of the bladder	110
6853	P17600	SYN1	Synapsin-1 (Brain protein 4.1) (Synapsin I)	HP:0000009	Functional abnormality of the bladder	111
146713	A6NFN3	RFOX3	RNA binding protein fox-1 homolog 3 (Fox-1 homolog C) (Neuronal nuclei antigen) (NeuN antigen)	HP:0000009	Functional abnormality of the bladder	112
8927	Q9UPA5	BSN	Protein bassoon (Zinc finger protein 231)	HP:0000009	Functional abnormality of the bladder	113
7994	Q92794	KAT6A	Histone acetyltransferase KAT6A (EC 2.3.1.48) (MOZ, YBF2/SAS3, SAS2 and TIP60 protein 3) (MYST-3) (Monocytic leukemia zinc finger protein) (Runt-related transcription factor-binding protein 2) (Zinc finger protein 220)	HP:0000009	Functional abnormality of the bladder	114
81846	Q86WG5	MTMRD	Myotubularin-related protein 13 (Inactive phosphatidylinositol 3-phosphatase 13) (SET-binding factor 2)	HP:0000009	Functional abnormality of the bladder	115
23476	O60885	BRD4	Bromodomain-containing protein 4 (Protein HUNK1)	HP:0000009	Functional abnormality of the bladder	116
2902	Q05586	NMDZ1	Glutamate receptor ionotropic, NMDA 1 (GluN1) (Glutamate [NMDA] receptor subunit zeta-1) (N-methyl-D-aspartate receptor subunit NR1) (NMD-R1)	HP:0000009	Functional abnormality of the bladder	117
54617	Q9ULG1	INO80	Chromatin-remodeling ATPase INO80 (hINO80) (EC 3.6.4.-) (DNA helicase-related INO80 complex homolog 1) (DNA helicase-related protein INO80) (INO80 complex subunit A)	HP:0000009	Functional abnormality of the bladder	118
6599	Q92922	SMRC1	SWI/SNF complex subunit SMARCC1 (BRG1-associated factor 155) (BAF155) (SWI/SNF complex 155 kDa subunit) (SWI/SNF-related matrix-associated actin-dependent regulator of chromatin subfamily C member 1)	HP:0000009	Functional abnormality of the bladder	119
11141	Q9NZN1	IRPL1	Interleukin-1 receptor accessory protein-like 1 (IL-1-RAPL-1) (IL-1RAPL-1) (IL1RAPL-1) (EC 3.2.2.6) (Oligophrenin-4) (Three immunoglobulin domain-containing IL-1 receptor-related 2) (TIGIRR-2) (X-linked interleukin-1 receptor accessory protein-like 1)	HP:0000009	Functional abnormality of the bladder	120
6872	P21675	TAF1	Transcription initiation factor TFIID subunit 1 (EC 2.3.1.48) (EC 2.7.11.1) (Cell cycle gene 1 protein) (TBP-associated factor 250 kDa) (p250) (Transcription initiation factor TFIID 250 kDa subunit) (TAF(II)250) (TAFII-250) (TAFII250)	HP:0000009	Functional abnormality of the bladder	121
7468	O96028	NSD2	Histone-lysine N-methyltransferase NSD2 (EC 2.1.1.357) (Multiple myeloma SET domain-containing protein) (MMSET) (Nuclear SET domain-containing protein 2) (Protein trithorax-5) (Wolf-Hirschhorn syndrome candidate 1 protein)	HP:0000009	Functional abnormality of the bladder	122
9927	O95140	MFN2	Mitofusin-2 (EC 3.6.5.-) (Transmembrane GTPase MFN2)	HP:0000009	Functional abnormality of the bladder	123
5354	P60201	MYPR	Myelin proteolipid protein (PLP) (Lipophilin)	HP:0000009	Functional abnormality of the bladder	124
23469	Q92576	PHF3	PHD finger protein 3	HP:0000009	Functional abnormality of the bladder	125
29994	Q9UIF8	BAZ2B	Bromodomain adjacent to zinc finger domain protein 2B (hWALp4)	HP:0000009	Functional abnormality of the bladder	126
4983	O60890	OPHN1	Oligophrenin-1	HP:0000009	Functional abnormality of the bladder	127
8239	Q93008	USP9X	Probable ubiquitin carboxyl-terminal hydrolase FAF-X (EC 3.4.19.12) (Deubiquitinating enzyme FAF-X) (Fat facets in mammals) (hFAM) (Fat facets protein-related, X-linked) (Ubiquitin thioesterase FAF-X) (Ubiquitin-specific protease 9, X chromosome) (Ubiquitin-specific-processing protease FAF-X)	HP:0000009	Functional abnormality of the bladder	128
54904	Q9BZ95	NSD3	Histone-lysine N-methyltransferase NSD3 (EC 2.1.1.370) (EC 2.1.1.371) (Nuclear SET domain-containing protein 3) (Protein whistle) (WHSC1-like 1 isoform 9 with methyltransferase activity to lysine) (Wolf-Hirschhorn syndrome candidate 1-like protein 1) (WHSC1-like protein 1)	HP:0000009	Functional abnormality of the bladder	129
1778	Q14204	DYHC1	Cytoplasmic dynein 1 heavy chain 1 (Cytoplasmic dynein heavy chain 1) (Dynein heavy chain, cytosolic)	HP:0000009	Functional abnormality of the bladder	130
2648	Q92830	KAT2A	Histone acetyltransferase KAT2A (EC 2.3.1.48) (General control of amino acid synthesis protein 5-like 2) (Histone acetyltransferase GCN5) (hGCN5) (Histone glutaryltransferase KAT2A) (EC 2.3.1.-) (Histone succinyltransferase KAT2A) (EC 2.3.1.-) (Lysine acetyltransferase 2A) (STAF97)	HP:0000009	Functional abnormality of the bladder	131
120775	Q8NGH3	OR2D3	Olfactory receptor 2D3 (Olfactory receptor OR11-89)	HP:0000009	Functional abnormality of the bladder	132
254065	Q6RI45	BRWD3	Bromodomain and WD repeat-containing protein 3	HP:0000009	Functional abnormality of the bladder	133
30827	Q9P0U4	CXXC1	CXXC-type zinc finger protein 1 (CpG-binding protein) (PHD finger and CXXC domain-containing protein 1)	HP:0000009	Functional abnormality of the bladder	134
815	Q9UQM7	KCC2A	Calcium/calmodulin-dependent protein kinase type II subunit alpha (CaM kinase II subunit alpha) (CaMK-II subunit alpha) (EC 2.7.11.17)	HP:0000009	Functional abnormality of the bladder	135
7158	Q12888	TP53B	TP53-binding protein 1 (53BP1) (p53-binding protein 1) (p53BP1)	HP:0000009	Functional abnormality of the bladder	136
6855	P08247	SYPH	Synaptophysin (Major synaptic vesicle protein p38)	HP:0000009	Functional abnormality of the bladder	137
123606	Q7RTP0	NIPA1	Magnesium transporter NIPA1 (Non-imprinted in Prader-Willi/Angelman syndrome region protein 1) (Spastic paraplegia 6 protein)	HP:0000009	Functional abnormality of the bladder	138
9869	Q15047	SETB1	Histone-lysine N-methyltransferase SETDB1 (EC 2.1.1.366) (ERG-associated protein with SET domain) (ESET) (Histone H3-K9 methyltransferase 4) (H3-K9-HMTase 4) (Lysine N-methyltransferase 1E) (SET domain bifurcated 1)	HP:0000009	Functional abnormality of the bladder	139
2898	Q13002	GRIK2	Glutamate receptor ionotropic, kainate 2 (GluK2) (Excitatory amino acid receptor 4) (EAA4) (Glutamate receptor 6) (GluR-6) (GluR6)	HP:0000009	Functional abnormality of the bladder	140
84444	Q8TEK3	DOT1L	Histone-lysine N-methyltransferase, H3 lysine-79 specific (EC 2.1.1.360) (DOT1-like protein) (Histone H3-K79 methyltransferase) (H3-K79-HMTase) (Lysine N-methyltransferase 4)	HP:0000009	Functional abnormality of the bladder	141
8850	Q92831	KAT2B	Histone acetyltransferase KAT2B (EC 2.3.1.48) (Histone acetyltransferase PCAF) (Histone acetylase PCAF) (Lysine acetyltransferase 2B) (P300/CBP-associated factor) (P/CAF) (Spermidine acetyltransferase KAT2B) (EC 2.3.1.57)	HP:0000009	Functional abnormality of the bladder	142
1741	Q92796	DLG3	Disks large homolog 3 (Neuroendocrine-DLG) (Synapse-associated protein 102) (SAP-102) (SAP102) (XLMR)	HP:0000009	Functional abnormality of the bladder	143
80853	Q6ZMT4	KDM7A	Lysine-specific demethylase 7A (EC 1.14.11.-) (JmjC domain-containing histone demethylation protein 1D) (Lysine-specific demethylase 7)	HP:0000009	Functional abnormality of the bladder	144
51317	Q96BD5	PF21A	PHD finger protein 21A (BHC80a) (BRAF35-HDAC complex protein BHC80)	HP:0000009	Functional abnormality of the bladder	145
58512	O95886	DLGP3	Disks large-associated protein 3 (DAP-3) (PSD-95/SAP90-binding protein 3) (SAP90/PSD-95-associated protein 3) (SAPAP3)	HP:0000009	Functional abnormality of the bladder	146
9758	Q14CM0	FRPD4	FERM and PDZ domain-containing protein 4 (PDZ domain-containing protein 10) (PSD-95-interacting regulator of spine morphogenesis) (Preso)	HP:0000009	Functional abnormality of the bladder	147
11176	Q9UIF9	BAZ2A	Bromodomain adjacent to zinc finger domain protein 2A (Transcription termination factor I-interacting protein 5) (TTF-I-interacting protein 5) (Tip5) (hWALp3)	HP:0000009	Functional abnormality of the bladder	148
6839	O43463	SUV91	Histone-lysine N-methyltransferase SUV39H1 (EC 2.1.1.355) (Histone H3-K9 methyltransferase 1) (H3-K9-HMTase 1) (Lysine N-methyltransferase 1A) (Position-effect variegation 3-9 homolog) (Suppressor of variegation 3-9 homolog 1) (Su(var)3-9 homolog 1)	HP:0000009	Functional abnormality of the bladder	149
23013	Q96T58	MINT	Msx2-interacting protein (SMART/HDAC1-associated repressor protein) (SPEN homolog)	HP:0000009	Functional abnormality of the bladder	150
79728	Q86YC2	PALB2	Partner and localizer of BRCA2	HP:0000010	Recurrent urinary tract infections	1
84464	Q8IY92	SLX4	Structure-specific endonuclease subunit SLX4 (BTB/POZ domain-containing protein 12)	HP:0000010	Recurrent urinary tract infections	2
91442	Q9BTP7	FAP24	Fanconi anemia core complex-associated protein 24 (Fanconi anemia-associated protein of 24 kDa)	HP:0000010	Recurrent urinary tract infections	3
146956	Q96AY2	EME1	Crossover junction endonuclease EME1 (EC 3.1.22.-) (MMS4 homolog) (hMMS4)	HP:0000010	Recurrent urinary tract infections	4
80233	Q0VG06	FP100	Fanconi anemia core complex-associated protein 100 (Fanconi anemia-associated protein of 100 kDa)	HP:0000010	Recurrent urinary tract infections	5
2178	Q9HB96	FANCE	Fanconi anemia group E protein (Protein FACE)	HP:0000010	Recurrent urinary tract infections	6
7516	O43543	XRCC2	DNA repair protein XRCC2 (X-ray repair cross-complementing protein 2)	HP:0000010	Recurrent urinary tract infections	7
197342	A4GXA9	EME2	Probable crossover junction endonuclease EME2 (EC 3.1.22.-)	HP:0000010	Recurrent urinary tract infections	8
80010	Q9H9A7	RMI1	RecQ-mediated genome instability protein 1 (BLM-associated protein of 75 kDa) (BLAP75) (FAAP75)	HP:0000010	Recurrent urinary tract infections	9
2188	Q9NPI8	FANCF	Fanconi anemia group F protein (Protein FACF)	HP:0000010	Recurrent urinary tract infections	10
55120	Q9NW38	FANCL	E3 ubiquitin-protein ligase FANCL (EC 2.3.2.27) (Fanconi anemia group L protein) (Fanconi anemia-associated polypeptide of 43 kDa) (FAAP43) (RING-type E3 ubiquitin transferase FANCL)	HP:0000010	Recurrent urinary tract infections	11
5980	O60673	REV3L	DNA polymerase zeta catalytic subunit (EC 2.7.7.7) (Protein reversionless 3-like) (REV3-like) (hREV3)	HP:0000010	Recurrent urinary tract infections	12
675	P51587	BRCA2	Breast cancer type 2 susceptibility protein (Fanconi anemia group D1 protein)	HP:0000010	Recurrent urinary tract infections	13
5889	O43502	RA51C	DNA repair protein RAD51 homolog 3 (R51H3) (RAD51 homolog C) (RAD51-like protein 2)	HP:0000010	Recurrent urinary tract infections	14
83990	Q9BX63	FANCJ	Fanconi anemia group J protein (Protein FACJ) (EC 3.6.4.13) (ATP-dependent RNA helicase BRIP1) (BRCA1-associated C-terminal helicase 1) (BRCA1-interacting protein C-terminal helicase 1) (BRCA1-interacting protein 1)	HP:0000010	Recurrent urinary tract infections	15
57697	Q8IYD8	FANCM	Fanconi anemia group M protein (Protein FACM) (EC 3.6.4.13) (ATP-dependent RNA helicase FANCM) (Fanconi anemia-associated polypeptide of 250 kDa) (FAAP250) (Protein Hef ortholog)	HP:0000010	Recurrent urinary tract infections	16
353497	Q7Z5Q5	DPOLN	DNA polymerase nu (EC 2.7.7.7)	HP:0000010	Recurrent urinary tract infections	17
2175	O15360	FANCA	Fanconi anemia group A protein (Protein FACA)	HP:0000010	Recurrent urinary tract infections	18
2189	O15287	FANCG	Fanconi anemia group G protein (Protein FACG) (DNA repair protein XRCC9)	HP:0000010	Recurrent urinary tract infections	19
5810	O60671	RAD1	Cell cycle checkpoint protein RAD1 (hRAD1) (EC 3.1.11.2) (DNA repair exonuclease rad1 homolog) (Rad1-like DNA damage checkpoint protein)	HP:0000010	Recurrent urinary tract infections	20
80198	Q96NY9	MUS81	Crossover junction endonuclease MUS81 (EC 3.1.22.-)	HP:0000010	Recurrent urinary tract infections	21
2177	Q9BXW9	FACD2	Fanconi anemia group D2 protein (Protein FACD2)	HP:0000010	Recurrent urinary tract infections	22
51455	Q9UBZ9	REV1	DNA repair protein REV1 (EC 2.7.7.-) (Alpha integrin-binding protein 80) (AIBP80) (Rev1-like terminal deoxycytidyl transferase)	HP:0000010	Recurrent urinary tract infections	23
22909	Q9Y2M0	FAN1	Fanconi-associated nuclease 1 (EC 3.1.21.-) (EC 3.1.4.1) (FANCD2/FANCI-associated nuclease 1) (hFAN1) (Myotubularin-related protein 15)	HP:0000010	Recurrent urinary tract infections	24
2187	Q8NB91	FANCB	Fanconi anemia group B protein (Protein FACB) (Fanconi anemia-associated polypeptide of 95 kDa) (FAAP95)	HP:0000010	Recurrent urinary tract infections	25
84126	Q8WXE1	ATRIP	ATR-interacting protein (ATM and Rad3-related-interacting protein)	HP:0000010	Recurrent urinary tract infections	26
3364	O60921	HUS1	Checkpoint protein HUS1 (hHUS1)	HP:0000010	Recurrent urinary tract infections	27
56852	Q9NS91	RAD18	E3 ubiquitin-protein ligase RAD18 (EC 2.3.2.27) (Postreplication repair protein RAD18) (hHR18) (hRAD18) (RING finger protein 73) (RING-type E3 ubiquitin transferase RAD18)	HP:0000010	Recurrent urinary tract infections	28
5884	O75943	RAD17	Cell cycle checkpoint protein RAD17 (hRad17) (RF-C/activator 1 homolog)	HP:0000010	Recurrent urinary tract infections	29
9937	Q6PJP8	DCR1A	DNA cross-link repair 1A protein (SNM1 homolog A) (hSNM1) (hSNM1A)	HP:0000010	Recurrent urinary tract infections	30
2176	Q00597	FANCC	Fanconi anemia group C protein (Protein FACC)	HP:0000010	Recurrent urinary tract infections	31
2072	Q92889	XPF	DNA repair endonuclease XPF (EC 3.1.-.-) (DNA excision repair protein ERCC-4) (DNA repair protein complementing XP-F cells) (Xeroderma pigmentosum group F-complementing protein)	HP:0000010	Recurrent urinary tract infections	32
5892	O75771	RA51D	DNA repair protein RAD51 homolog 4 (R51H3) (RAD51 homolog D) (RAD51-like protein 3) (TRAD)	HP:0000010	Recurrent urinary tract infections	33
7517	O43542	XRCC3	DNA repair protein XRCC3 (X-ray repair cross-complementing protein 3)	HP:0000010	Recurrent urinary tract infections	34
5890	O15315	RA51B	DNA repair protein RAD51 homolog 2 (R51H2) (RAD51 homolog B) (Rad51B) (RAD51-like protein 1)	HP:0000010	Recurrent urinary tract infections	35
10459	Q9UI95	MD2L2	Mitotic spindle assembly checkpoint protein MAD2B (Mitotic arrest deficient 2-like protein 2) (MAD2-like protein 2) (REV7 homolog) (hREV7)	HP:0000010	Recurrent urinary tract infections	36
11073	Q92547	TOPB1	DNA topoisomerase 2-binding protein 1 (DNA topoisomerase II-beta-binding protein 1) (TopBP1) (DNA topoisomerase II-binding protein 1)	HP:0000010	Recurrent urinary tract infections	37
4437	P20585	MSH3	DNA mismatch repair protein Msh3 (hMSH3) (Divergent upstream protein) (DUP) (Mismatch repair protein 1) (MRP1)	HP:0000010	Recurrent urinary tract infections	38
5883	Q99638	RAD9A	Cell cycle checkpoint control protein RAD9A (hRAD9) (EC 3.1.11.2) (DNA repair exonuclease rad9 homolog A)	HP:0000010	Recurrent urinary tract infections	39
27030	Q9UHC1	MLH3	DNA mismatch repair protein Mlh3 (MutL protein homolog 3)	HP:0000010	Recurrent urinary tract infections	40
116028	Q96E14	RMI2	RecQ-mediated genome instability protein 2 (hRMI2) (BLM-associated protein of 18 kDa) (BLAP18)	HP:0000010	Recurrent urinary tract infections	41
5932	Q99708	CTIP	DNA endonuclease RBBP8 (EC 3.1.-.-) (CtBP-interacting protein) (CtIP) (Retinoblastoma-binding protein 8) (RBBP-8) (Retinoblastoma-interacting protein and myosin-like) (RIM) (Sporulation in the absence of SPO11 protein 2 homolog) (SAE2)	HP:0000010	Recurrent urinary tract infections	42
5290	P42336	PK3CA	Phosphatidylinositol 4,5-bisphosphate 3-kinase catalytic subunit alpha isoform (PI3-kinase subunit alpha) (PI3K-alpha) (PI3Kalpha) (PtdIns-3-kinase subunit alpha) (EC 2.7.1.137) (EC 2.7.1.153) (Phosphatidylinositol 4,5-bisphosphate 3-kinase 110 kDa catalytic subunit alpha) (PtdIns-3-kinase subunit p110-alpha) (p110alpha) (Phosphoinositide 3-kinase alpha) (Phosphoinositide-3-kinase catalytic alpha…	HP:0000010	Recurrent urinary tract infections	43
51750	Q9NZ71	RTEL1	Regulator of telomere elongation helicase 1 (EC 3.6.4.12) (Novel helicase-like)	HP:0000010	Recurrent urinary tract infections	44
55215	Q9NVI1	FANCI	Fanconi anemia group I protein (Protein FACI)	HP:0000010	Recurrent urinary tract infections	45
348654	Q17RS7	GEN	Flap endonuclease GEN homolog 1 (EC 3.1.-.-)	HP:0000010	Recurrent urinary tract infections	46
5395	P54278	PMS2	Mismatch repair endonuclease PMS2 (EC 3.1.-.-) (DNA mismatch repair protein PMS2) (PMS1 protein homolog 2)	HP:0000010	Recurrent urinary tract infections	47
9156	Q9UQ84	EXO1	Exonuclease 1 (hExo1) (EC 3.1.-.-) (Exonuclease I) (hExoI)	HP:0000010	Recurrent urinary tract infections	48
25788	Q9Y620	RA54B	DNA repair and recombination protein RAD54B (EC 3.6.4.-) (RAD54 homolog B)	HP:0000010	Recurrent urinary tract infections	49
4292	P40692	MLH1	DNA mismatch repair protein Mlh1 (MutL protein homolog 1)	HP:0000010	Recurrent urinary tract infections	50
6117	P27694	RFA1	Replication protein A 70 kDa DNA-binding subunit (RP-A p70) (Replication factor A protein 1) (RF-A protein 1) (Single-stranded DNA-binding protein) [Cleaved into: Replication protein A 70 kDa DNA-binding subunit, N-terminally processed]	HP:0000010	Recurrent urinary tract infections	51
7486	Q14191	WRN	Werner syndrome ATP-dependent helicase (EC 3.6.4.12) (DNA helicase, RecQ-like type 3) (RecQ3) (Exonuclease WRN) (EC 3.1.-.-) (RecQ protein-like 2)	HP:0000010	Recurrent urinary tract infections	52
8438	Q92698	RAD54	DNA repair and recombination protein RAD54-like (EC 3.6.4.12) (RAD54 homolog) (hHR54) (hRAD54)	HP:0000010	Recurrent urinary tract infections	53
79915	Q96QE3	ATAD5	ATPase family AAA domain-containing protein 5 (Chromosome fragility-associated gene 1 protein)	HP:0000010	Recurrent urinary tract infections	54
641	P54132	BLM	Bloom syndrome protein (EC 3.6.4.12) (DNA helicase, RecQ-like type 2) (RecQ2) (RecQ protein-like 3)	HP:0000010	Recurrent urinary tract infections	55
29089	Q9NPD8	UBE2T	Ubiquitin-conjugating enzyme E2 T (EC 2.3.2.23) (Cell proliferation-inducing gene 50 protein) (E2 ubiquitin-conjugating enzyme T) (Ubiquitin carrier protein T) (Ubiquitin-protein ligase T)	HP:0000010	Recurrent urinary tract infections	56
6119	P35244	RFA3	Replication protein A 14 kDa subunit (RP-A p14) (Replication factor A protein 3) (RF-A protein 3)	HP:0000010	Recurrent urinary tract infections	57
5893	P43351	RAD52	DNA repair protein RAD52 homolog	HP:0000010	Recurrent urinary tract infections	58
5429	Q9Y253	POLH	DNA polymerase eta (EC 2.7.7.7) (RAD30 homolog A) (Xeroderma pigmentosum variant type protein)	HP:0000010	Recurrent urinary tract infections	59
9401	O94761	RECQ4	ATP-dependent DNA helicase Q4 (EC 3.6.4.12) (DNA helicase, RecQ-like type 4) (RecQ4) (RTS) (RecQ protein-like 4)	HP:0000010	Recurrent urinary tract infections	60
5965	P46063	RECQ1	ATP-dependent DNA helicase Q1 (EC 3.6.4.12) (DNA helicase, RecQ-like type 1) (RecQ1) (DNA-dependent ATPase Q1) (RecQ protein-like 1)	HP:0000010	Recurrent urinary tract infections	61
2067	P07992	ERCC1	DNA excision repair protein ERCC-1	HP:0000010	Recurrent urinary tract infections	62
23137	Q8IY18	SMC5	Structural maintenance of chromosomes protein 5 (SMC protein 5) (SMC-5) (hSMC5)	HP:0000010	Recurrent urinary tract infections	63
6118	P15927	RFA2	Replication protein A 32 kDa subunit (RP-A p32) (Replication factor A protein 2) (RF-A protein 2) (Replication protein A 34 kDa subunit) (RP-A p34)	HP:0000010	Recurrent urinary tract infections	64
1763	P51530	DNA2	DNA replication ATP-dependent helicase/nuclease DNA2 (hDNA2) (DNA replication ATP-dependent helicase-like homolog) [Includes: DNA replication nuclease DNA2 (EC 3.1.-.-); DNA replication ATP-dependent helicase DNA2 (EC 3.6.4.12)]	HP:0000010	Recurrent urinary tract infections	65
4361	P49959	MRE11	Double-strand break repair protein MRE11 (EC 3.1.-.-) (Double-strand break repair protein MRE11A) (Meiotic recombination 11 homolog 1) (MRE11 homolog 1) (Meiotic recombination 11 homolog A) (MRE11 homolog A)	HP:0000010	Recurrent urinary tract infections	66
2956	P52701	MSH6	DNA mismatch repair protein Msh6 (hMSH6) (G/T mismatch-binding protein) (GTBP) (GTMBP) (MutS protein homolog 6) (MutS-alpha 160 kDa subunit) (p160)	HP:0000010	Recurrent urinary tract infections	67
64858	Q9H816	DCR1B	5' exonuclease Apollo (EC 3.1.-.-) (DNA cross-link repair 1B protein) (SNM1 homolog B) (SNMIB) (hSNM1B)	HP:0000010	Recurrent urinary tract infections	68
6596	Q14527	HLTF	Helicase-like transcription factor (EC 2.3.2.27) (EC 3.6.4.-) (DNA-binding protein/plasminogen activator inhibitor 1 regulator) (HIP116) (RING finger protein 80) (RING-type E3 ubiquitin transferase HLTF) (SWI/SNF-related matrix-associated actin-dependent regulator of chromatin subfamily A member 3) (Sucrose nonfermenting protein 2-like 3)	HP:0000010	Recurrent urinary tract infections	69
7398	O94782	UBP1	Ubiquitin carboxyl-terminal hydrolase 1 (EC 3.4.19.12) (Deubiquitinating enzyme 1) (hUBP) (Ubiquitin thioesterase 1) (Ubiquitin-specific-processing protease 1)	HP:0000010	Recurrent urinary tract infections	70
4439	O43196	MSH5	MutS protein homolog 5 (hMSH5)	HP:0000010	Recurrent urinary tract infections	71
9400	O94762	RECQ5	ATP-dependent DNA helicase Q5 (EC 3.6.4.12) (DNA helicase, RecQ-like type 5) (RecQ5) (RecQ protein-like 5)	HP:0000010	Recurrent urinary tract infections	72
7518	Q13426	XRCC4	DNA repair protein XRCC4 (X-ray repair cross-complementing protein 4)	HP:0000010	Recurrent urinary tract infections	73
5378	P54277	PMS1	PMS1 protein homolog 1 (DNA mismatch repair protein PMS1)	HP:0000010	Recurrent urinary tract infections	74
57599	Q8TAF3	WDR48	WD repeat-containing protein 48 (USP1-associated factor 1) (WD repeat endosomal protein) (p80)	HP:0000010	Recurrent urinary tract infections	75
2073	P28715	ERCC5	DNA repair protein complementing XP-G cells (EC 3.1.-.-) (DNA excision repair protein ERCC-5) (Xeroderma pigmentosum group G-complementing protein)	HP:0000010	Recurrent urinary tract infections	76
254528	Q8N635	MEIOB	Meiosis-specific with OB domain-containing protein (EC 3.1.-.-)	HP:0000010	Recurrent urinary tract infections	77
7507	P23025	XPA	DNA repair protein complementing XP-A cells (Xeroderma pigmentosum group A-complementing protein)	HP:0000010	Recurrent urinary tract infections	78
54962	Q9BVW5	TIPIN	TIMELESS-interacting protein	HP:0000010	Recurrent urinary tract infections	79
10714	Q15054	DPOD3	DNA polymerase delta subunit 3 (DNA polymerase delta subunit C) (DNA polymerase delta subunit p66) (DNA polymerase delta subunit p68)	HP:0000010	Recurrent urinary tract infections	80
4683	O60934	NBN	Nibrin (Cell cycle regulatory protein p95) (Nijmegen breakage syndrome protein 1)	HP:0000010	Recurrent urinary tract infections	81
10111	Q92878	RAD50	DNA repair protein RAD50 (hRAD50) (EC 3.6.-.-)	HP:0000010	Recurrent urinary tract infections	82
201254	A8MT69	CENPX	Centromere protein X (CENP-X) (FANCM-associated histone fold protein 2) (FANCM-interacting histone fold protein 2) (Fanconi anemia-associated polypeptide of 10 kDa) (Retinoic acid-inducible gene D9 protein homolog) (Stimulated by retinoic acid gene 13 protein homolog)	HP:0000010	Recurrent urinary tract infections	83
63967	Q9HAW4	CLSPN	Claspin (hClaspin)	HP:0000010	Recurrent urinary tract infections	84
5426	Q07864	DPOE1	DNA polymerase epsilon catalytic subunit A (EC 2.7.7.7) (3'-5' exodeoxyribonuclease) (EC 3.1.11.-) (DNA polymerase II subunit A)	HP:0000010	Recurrent urinary tract infections	85
4436	P43246	MSH2	DNA mismatch repair protein Msh2 (hMSH2) (MutS protein homolog 2)	HP:0000010	Recurrent urinary tract infections	86
113510	Q8TDG4	HELQ	Helicase POLQ-like (EC 3.6.4.12) (Mus308-like helicase) (POLQ-like helicase)	HP:0000010	Recurrent urinary tract infections	87
5981	P35251	RFC1	Replication factor C subunit 1 (Activator 1 140 kDa subunit) (A1 140 kDa subunit) (Activator 1 large subunit) (Activator 1 subunit 1) (DNA-binding protein PO-GA) (Replication factor C 140 kDa subunit) (RF-C 140 kDa subunit) (RFC140) (Replication factor C large subunit)	HP:0000010	Recurrent urinary tract infections	88
7156	Q13472	TOP3A	DNA topoisomerase 3-alpha (EC 5.6.2.1) (DNA topoisomerase III alpha)	HP:0000010	Recurrent urinary tract infections	89
545	Q13535	ATR	Serine/threonine-protein kinase ATR (EC 2.7.11.1) (Ataxia telangiectasia and Rad3-related protein) (FRAP-related protein 1)	HP:0000010	Recurrent urinary tract infections	90
23626	Q9Y5K1	SPO11	Meiotic recombination protein SPO11 (EC 5.6.2.2) (Cancer/testis antigen 35) (CT35)	HP:0000010	Recurrent urinary tract infections	91
580	Q99728	BARD1	BRCA1-associated RING domain protein 1 (BARD-1) (EC 2.3.2.27) (RING-type E3 ubiquitin transferase BARD1)	HP:0000010	Recurrent urinary tract infections	92
10721	O75417	DPOLQ	DNA polymerase theta (EC 2.7.7.7) (DNA polymerase eta)	HP:0000010	Recurrent urinary tract infections	93
472	Q13315	ATM	Serine-protein kinase ATM (EC 2.7.11.1) (Ataxia telangiectasia mutated) (A-T mutated)	HP:0000010	Recurrent urinary tract infections	94
672	P38398	BRCA1	Breast cancer type 1 susceptibility protein (EC 2.3.2.27) (RING finger protein 53) (RING-type E3 ubiquitin transferase BRCA1)	HP:0000010	Recurrent urinary tract infections	95
728888	E5RHQ5	NPB11	Nuclear pore complex-interacting protein family member B11	HP:0000010	Recurrent urinary tract infections	96
79677	Q96SB8	SMC6	Structural maintenance of chromosomes protein 6 (SMC protein 6) (SMC-6) (hSMC6)	HP:0000010	Recurrent urinary tract infections	97
79991	Q9H668	STN1	CST complex subunit STN1 (Oligonucleotide/oligosaccharide-binding fold-containing protein 1) (Suppressor of cdc thirteen homolog)	HP:0000010	Recurrent urinary tract infections	98
257218	Q149N8	SHPRH	E3 ubiquitin-protein ligase SHPRH (EC 2.3.2.27) (EC 3.6.4.-) (RING-type E3 ubiquitin transferase SHPRH) (SNF2, histone-linker, PHD and RING finger domain-containing helicase)	HP:0000010	Recurrent urinary tract infections	99
253714	Q6ZRQ5	MMS22	Protein MMS22-like (Methyl methanesulfonate-sensitivity protein 22-like)	HP:0000010	Recurrent urinary tract infections	100
50485	Q9NZC9	SMAL1	SWI/SNF-related matrix-associated actin-dependent regulator of chromatin subfamily A-like protein 1 (EC 3.6.4.-) (HepA-related protein) (hHARP) (Sucrose nonfermenting protein 2-like 1)	HP:0000010	Recurrent urinary tract infections	101
1111	O14757	CHK1	Serine/threonine-protein kinase Chk1 (EC 2.7.11.1) (CHK1 checkpoint homolog) (Cell cycle checkpoint kinase) (Checkpoint kinase-1)	HP:0000010	Recurrent urinary tract infections	102
540	P35670	ATP7B	Copper-transporting ATPase 2 (EC 7.2.2.8) (Copper pump 2) (Wilson disease-associated protein) [Cleaved into: WND/140 kDa]	HP:0000010	Recurrent urinary tract infections	103
3978	P18858	DNLI1	DNA ligase 1 (EC 6.5.1.1) (DNA ligase I) (Polydeoxyribonucleotide synthase [ATP] 1)	HP:0000010	Recurrent urinary tract infections	104
29935	Q13156	RFA4	Replication protein A 30 kDa subunit (RP-A p30) (Replication factor A protein 4) (RF-A protein 4)	HP:0000010	Recurrent urinary tract infections	105
3981	P49917	DNLI4	DNA ligase 4 (EC 6.5.1.1) (DNA ligase IV) (Polydeoxyribonucleotide synthase [ATP] 4)	HP:0000010	Recurrent urinary tract infections	106
5295	P27986	P85A	Phosphatidylinositol 3-kinase regulatory subunit alpha (PI3-kinase regulatory subunit alpha) (PI3K regulatory subunit alpha) (PtdIns-3-kinase regulatory subunit alpha) (Phosphatidylinositol 3-kinase 85 kDa regulatory subunit alpha) (PI3-kinase subunit p85-alpha) (PtdIns-3-kinase regulatory subunit p85-alpha)	HP:0000010	Recurrent urinary tract infections	107
5296	O00459	P85B	Phosphatidylinositol 3-kinase regulatory subunit beta (PI3-kinase regulatory subunit beta) (PI3K regulatory subunit beta) (PtdIns-3-kinase regulatory subunit beta) (Phosphatidylinositol 3-kinase 85 kDa regulatory subunit beta) (PI3-kinase subunit p85-beta) (PtdIns-3-kinase regulatory subunit p85-beta)	HP:0000010	Recurrent urinary tract infections	108
9656	Q14676	MDC1	Mediator of DNA damage checkpoint protein 1 (Nuclear factor with BRCT domains 1)	HP:0000010	Recurrent urinary tract infections	109
79840	Q9H9Q4	NHEJ1	Non-homologous end-joining factor 1 (Protein cernunnos) (XRCC4-like factor)	HP:0000010	Recurrent urinary tract infections	110
5985	P40937	RFC5	Replication factor C subunit 5 (Activator 1 36 kDa subunit) (A1 36 kDa subunit) (Activator 1 subunit 5) (Replication factor C 36 kDa subunit) (RF-C 36 kDa subunit) (RFC36)	HP:0000010	Recurrent urinary tract infections	111
5424	P28340	DPOD1	DNA polymerase delta catalytic subunit (EC 2.7.7.7) (3'-5' exodeoxyribonuclease) (EC 3.1.11.-) (DNA polymerase subunit delta p125)	HP:0000010	Recurrent urinary tract infections	112
7204	O75962	TRIO	Triple functional domain protein (EC 2.7.11.1) (PTPRF-interacting protein)	HP:0000010	Recurrent urinary tract infections	113
51426	Q9UBT6	POLK	DNA polymerase kappa (EC 2.7.7.7) (DINB protein) (DINP)	HP:0000010	Recurrent urinary tract infections	114
144715	Q6WBX8	RAD9B	Cell cycle checkpoint control protein RAD9B (DNA repair exonuclease rad9 homolog B) (hRAD9B)	HP:0000010	Recurrent urinary tract infections	115
55159	Q6PCD5	RFWD3	E3 ubiquitin-protein ligase RFWD3 (EC 2.3.2.27) (RING finger and WD repeat domain-containing protein 3) (RING finger protein 201)	HP:0000010	Recurrent urinary tract infections	116
3672	P56199	ITA1	Integrin alpha-1 (CD49 antigen-like family member A) (Laminin and collagen receptor) (VLA-1) (CD antigen CD49a)	HP:0000010	Recurrent urinary tract infections	117
84893	Q8NFZ0	FBH1	F-box DNA helicase 1 (hFBH1) (EC 3.6.4.12) (F-box only protein 18)	HP:0000010	Recurrent urinary tract infections	118
254394	Q9NXL9	MCM9	DNA helicase MCM9 (hMCM9) (EC 3.6.4.12) (Mini-chromosome maintenance deficient domain-containing protein 1) (Minichromosome maintenance 9)	HP:0000010	Recurrent urinary tract infections	119
5983	P40938	RFC3	Replication factor C subunit 3 (Activator 1 38 kDa subunit) (A1 38 kDa subunit) (Activator 1 subunit 3) (Replication factor C 38 kDa subunit) (RF-C 38 kDa subunit) (RFC38)	HP:0000010	Recurrent urinary tract infections	120
2074	P0DP91	ERPG3	Chimeric ERCC6-PGBD3 protein (Chimeric CSB-PGBD3 protein)	HP:0000010	Recurrent urinary tract infections	121
9429	Q9UNQ0	ABCG2	Broad substrate specificity ATP-binding cassette transporter ABCG2 (EC 7.6.2.2) (ATP-binding cassette sub-family G member 2) (Breast cancer resistance protein) (CDw338) (Mitoxantrone resistance-associated protein) (Placenta-specific ATP-binding cassette transporter) (Urate exporter) (CD antigen CD338)	HP:0000010	Recurrent urinary tract infections	122
113235	Q96NT5	PCFT	Proton-coupled folate transporter (G21) (Heme carrier protein 1) (PCFT/HCP1) (Solute carrier family 46 member 1)	HP:0000010	Recurrent urinary tract infections	123
83932	Q9H040	SPRTN	DNA-dependent metalloprotease SPRTN (EC 3.4.24.-) (DNA damage protein targeting VCP) (DVC1) (Protein with SprT-like domain at the N terminus) (Spartan)	HP:0000010	Recurrent urinary tract infections	124
80174	Q8NFT6	DBF4B	Protein DBF4 homolog B (Activator of S phase kinase-like protein 1) (ASK-like protein 1) (Chiffon homolog B) (Dbf4-related factor 1)	HP:0000010	Recurrent urinary tract infections	125
3691	P16144	ITB4	Integrin beta-4 (GP150) (CD antigen CD104)	HP:0000010	Recurrent urinary tract infections	126
51720	Q96RL1	UIMC1	BRCA1-A complex subunit RAP80 (Receptor-associated protein 80) (Retinoid X receptor-interacting protein 110) (Ubiquitin interaction motif-containing protein 1)	HP:0000010	Recurrent urinary tract infections	127
9121	O15375	MOT6	Monocarboxylate transporter 6 (MCT 6) (Monocarboxylate transporter 5) (MCT 5) (Solute carrier family 16 member 5)	HP:0000010	Recurrent urinary tract infections	128
56606	Q9NRM0	GTR9	Solute carrier family 2, facilitated glucose transporter member 9 (Glucose transporter type 9) (GLUT-9) (Urate transporter)	HP:0000010	Recurrent urinary tract infections	129
159963	Q1EHB4	SC5AC	Sodium-coupled monocarboxylate transporter 2 (Electroneutral sodium monocarboxylate cotransporter) (Low-affinity sodium-lactate cotransporter) (Solute carrier family 5 member 12)	HP:0000010	Recurrent urinary tract infections	130
5422	P09884	DPOLA	DNA polymerase alpha catalytic subunit (EC 2.7.7.7) (DNA polymerase alpha catalytic subunit p180)	HP:0000010	Recurrent urinary tract infections	131
2237	P39748	FEN1	Flap endonuclease 1 (FEN-1) (EC 3.1.-.-) (DNase IV) (Flap structure-specific endonuclease 1) (Maturation factor 1) (MF1) (hFEN-1)	HP:0000010	Recurrent urinary tract infections	132
6518	P22732	GTR5	Solute carrier family 2, facilitated glucose transporter member 5 (Fructose transporter) (Glucose transporter type 5, small intestine) (GLUT-5)	HP:0000010	Recurrent urinary tract infections	133
27173	Q9NY26	S39A1	Zinc transporter ZIP1 (Solute carrier family 39 member 1) (Zinc-iron-regulated transporter-like) (Zrt- and Irt-like protein 1) (ZIP-1) (hZIP1)	HP:0000010	Recurrent urinary tract infections	134
11169	O75717	WDHD1	WD repeat and HMG-box DNA-binding protein 1 (Acidic nucleoplasmic DNA-binding protein 1) (And-1)	HP:0000010	Recurrent urinary tract infections	135
5425	P49005	DPOD2	DNA polymerase delta subunit 2 (DNA polymerase delta subunit p50)	HP:0000010	Recurrent urinary tract infections	136
84142	Q6UWZ7	ABRX1	BRCA1-A complex subunit Abraxas 1 (Coiled-coil domain-containing protein 98) (Protein FAM175A)	HP:0000010	Recurrent urinary tract infections	137
7515	P18887	XRCC1	DNA repair protein XRCC1 (X-ray repair cross-complementing protein 1)	HP:0000010	Recurrent urinary tract infections	138
940	P10747	CD28	T-cell-specific surface glycoprotein CD28 (TP44) (CD antigen CD28)	HP:0000010	Recurrent urinary tract infections	139
6565	Q16348	S15A2	Solute carrier family 15 member 2 (Kidney H(+)/peptide cotransporter) (Oligopeptide transporter, kidney isoform) (Peptide transporter 2)	HP:0000010	Recurrent urinary tract infections	140
4288	P46013	KI67	Proliferation marker protein Ki-67 (Antigen identified by monoclonal antibody Ki-67) (Antigen KI-67) (Antigen Ki67)	HP:0000010	Recurrent urinary tract infections	141
11200	O96017	CHK2	Serine/threonine-protein kinase Chk2 (EC 2.7.11.1) (CHK2 checkpoint homolog) (Cds1 homolog) (Hucds1) (hCds1) (Checkpoint kinase 2)	HP:0000010	Recurrent urinary tract infections	142
2074	P0DP91	ERPG3	Chimeric ERCC6-PGBD3 protein (Chimeric CSB-PGBD3 protein)	HP:0000010	Recurrent urinary tract infections	143
200010	Q2M3M2	SC5A9	Sodium/glucose cotransporter 4 (Na(+)/glucose cotransporter 4) (hSGLT4) (Solute carrier family 5 member 9)	HP:0000010	Recurrent urinary tract infections	144
6564	P46059	S15A1	Solute carrier family 15 member 1 (Intestinal H(+)/peptide cotransporter) (Oligopeptide transporter, small intestine isoform) (Peptide transporter 1)	HP:0000010	Recurrent urinary tract infections	145
6568	Q14916	NPT1	Sodium-dependent phosphate transport protein 1 (Na(+)/PI cotransporter 1) (Na/Pi-4) (Renal Na(+)-dependent phosphate cotransporter 1) (Renal sodium-dependent phosphate transport protein 1) (Renal sodium-phosphate transport protein 1) (Sodium/phosphate cotransporter 1) (Solute carrier family 17 member 1)	HP:0000010	Recurrent urinary tract infections	146
286053	Q96MF7	NSE2	E3 SUMO-protein ligase NSE2 (EC 2.3.2.-) (E3 SUMO-protein transferase NSE2) (MMS21 homolog) (hMMS21) (Non-structural maintenance of chromosomes element 2 homolog) (Non-SMC element 2 homolog)	HP:0000010	Recurrent urinary tract infections	147
546	P46100	ATRX	Transcriptional regulator ATRX (EC 3.6.4.12) (ATP-dependent helicase ATRX) (X-linked helicase II) (X-linked nuclear protein) (XNP) (Znf-HX)	HP:0000010	Recurrent urinary tract infections	148
6566	P53985	MOT1	Monocarboxylate transporter 1 (MCT 1) (Solute carrier family 16 member 1)	HP:0000010	Recurrent urinary tract infections	149
3177	Q14542	S29A2	Equilibrative nucleoside transporter 2 (36 kDa nucleolar protein HNP36) (Delayed-early response protein 12) (Equilibrative nitrobenzylmercaptopurine riboside-insensitive nucleoside transporter) (Equilibrative NBMPR-insensitive nucleoside transporter) (Hydrophobic nucleolar protein, 36 kDa) (Nucleoside transporter, ei-type) (Solute carrier family 29 member 2)	HP:0000010	Recurrent urinary tract infections	150
80208	Q96JI7	SPTCS	Spatacsin (Colorectal carcinoma-associated protein) (Spastic paraplegia 11 protein)	HP:0000011	Neurogenic bladder	1
6622	P37840	SYUA	Alpha-synuclein (Non-A beta component of AD amyloid) (Non-A4 component of amyloid precursor) (NACP)	HP:0000011	Neurogenic bladder	2
5190	Q13608	PEX6	Peroxisome assembly factor 2 (PAF-2) (Peroxin-6) (Peroxisomal biogenesis factor 6) (Peroxisomal-type ATPase 1)	HP:0000011	Neurogenic bladder	3
23400	Q9NQ11	AT132	Polyamine-transporting ATPase 13A2 (EC 7.6.2.-)	HP:0000011	Neurogenic bladder	4
9895	O15040	TCPR2	Tectonin beta-propeller repeat-containing protein 2 (WD repeat-containing protein KIAA0329/KIAA0297)	HP:0000011	Neurogenic bladder	5
55666	Q8TAT6	NPL4	Nuclear protein localization protein 4 homolog (Protein NPL4)	HP:0000011	Neurogenic bladder	6
10277	O95155	UBE4B	Ubiquitin conjugation factor E4 B (EC 2.3.2.27) (Homozygously deleted in neuroblastoma 1) (RING-type E3 ubiquitin transferase E4 B) (Ubiquitin fusion degradation protein 2)	HP:0000011	Neurogenic bladder	7
11160	O94905	ERLN2	Erlin-2 (Endoplasmic reticulum lipid raft-associated protein 2) (Stomatin-prohibitin-flotillin-HflC/K domain-containing protein 2) (SPFH domain-containing protein 2)	HP:0000011	Neurogenic bladder	8
5192	O60683	PEX10	Peroxisome biogenesis factor 10 (Peroxin-10) (Peroxisomal biogenesis factor 10) (Peroxisome assembly protein 10) (RING finger protein 69)	HP:0000011	Neurogenic bladder	9
84447	Q86TM6	SYVN1	E3 ubiquitin-protein ligase synoviolin (EC 2.3.2.27) (RING-type E3 ubiquitin transferase synoviolin) (Synovial apoptosis inhibitor 1)	HP:0000011	Neurogenic bladder	10
7353	Q92890	UFD1	Ubiquitin recognition factor in ER-associated degradation protein 1 (Ubiquitin fusion degradation protein 1) (UB fusion protein 1)	HP:0000011	Neurogenic bladder	11
5979	P07949	RET	Proto-oncogene tyrosine-protein kinase receptor Ret (EC 2.7.10.1) (Cadherin family member 12) (Proto-oncogene c-Ret) [Cleaved into: Soluble RET kinase fragment; Extracellular cell-membrane anchored RET cadherin 120 kDa fragment]	HP:0000011	Neurogenic bladder	12
267	Q9UKV5	AMFR	E3 ubiquitin-protein ligase AMFR (EC 2.3.2.36) (Autocrine motility factor receptor) (AMF receptor) (RING finger protein 45) (gp78)	HP:0000011	Neurogenic bladder	13
5193	O00623	PEX12	Peroxisome assembly protein 12 (Peroxin-12) (Peroxisome assembly factor 3) (PAF-3)	HP:0000011	Neurogenic bladder	14
9927	O95140	MFN2	Mitofusin-2 (EC 3.6.5.-) (Transmembrane GTPase MFN2)	HP:0000011	Neurogenic bladder	15
5663	P49768	PSN1	Presenilin-1 (PS-1) (EC 3.4.23.-) (Protein S182) [Cleaved into: Presenilin-1 NTF subunit; Presenilin-1 CTF subunit; Presenilin-1 CTF12 (PS1-CTF12)]	HP:0000011	Neurogenic bladder	16
5189	O43933	PEX1	Peroxisome biogenesis factor 1 (Peroxin-1) (Peroxisome biogenesis disorder protein 1)	HP:0000011	Neurogenic bladder	17
4908	P20783	NTF3	Neurotrophin-3 (NT-3) (HDNF) (Nerve growth factor 2) (NGF-2) (Neurotrophic factor)	HP:0000011	Neurogenic bladder	18
51024	Q9Y3D6	FIS1	Mitochondrial fission 1 protein (FIS1 homolog) (hFis1) (Tetratricopeptide repeat protein 11) (TPR repeat protein 11)	HP:0000011	Neurogenic bladder	19
2066	Q15303	ERBB4	Receptor tyrosine-protein kinase erbB-4 (EC 2.7.10.1) (Proto-oncogene-like protein c-ErbB-4) (Tyrosine kinase-type cell surface receptor HER4) (p180erbB4) [Cleaved into: ERBB4 intracellular domain (4ICD) (E4ICD) (s80HER4)]	HP:0000011	Neurogenic bladder	20
10908	Q8IY17	PLPL6	Patatin-like phospholipase domain-containing protein 6 (EC 3.1.1.5) (Neuropathy target esterase)	HP:0000011	Neurogenic bladder	21
5191	O00628	PEX7	Peroxisomal targeting signal 2 receptor (PTS2 receptor) (Peroxin-7)	HP:0000011	Neurogenic bladder	22
627	P23560	BDNF	Brain-derived neurotrophic factor (BDNF) (Abrineurin) [Cleaved into: BDNF precursor form (ProBDNF)]	HP:0000011	Neurogenic bladder	23
8800	O75192	PX11A	Peroxisomal membrane protein 11A (HsPEX11p) (28 kDa peroxisomal integral membrane protein) (PMP28) (Peroxin-11A) (Peroxisomal biogenesis factor 11A) (Protein PEX11 homolog alpha) (PEX11-alpha)	HP:0000011	Neurogenic bladder	24
84557	Q9H492	MLP3A	Microtubule-associated proteins 1A/1B light chain 3A (Autophagy-related protein LC3 A) (Autophagy-related ubiquitin-like modifier LC3 A) (MAP1 light chain 3-like protein 1) (MAP1A/MAP1B light chain 3 A) (MAP1A/MAP1B LC3 A) (Microtubule-associated protein 1 light chain 3 alpha)	HP:0000011	Neurogenic bladder	25
6048	Q99942	RNF5	E3 ubiquitin-protein ligase RNF5 (EC 2.3.2.27) (Protein G16) (RING finger protein 5) (RING-type E3 ubiquitin transferase RNF5) (Ram1 homolog) (HsRma1)	HP:0000011	Neurogenic bladder	26
2081	O75460	ERN1	Serine/threonine-protein kinase/endoribonuclease IRE1 (Endoplasmic reticulum-to-nucleus signaling 1) (Inositol-requiring protein 1) (hIRE1p) (Ire1-alpha) (IRE1a) [Includes: Serine/threonine-protein kinase (EC 2.7.11.1); Endoribonuclease (EC 3.1.26.-)]	HP:0000011	Neurogenic bladder	27
5824	P40855	PEX19	Peroxisomal biogenesis factor 19 (33 kDa housekeeping protein) (Peroxin-19) (Peroxisomal farnesylated protein)	HP:0000011	Neurogenic bladder	28
219743	Q2T9J0	TYSD1	Peroxisomal leader peptide-processing protease (EC 3.4.21.-) (Trypsin domain-containing protein 1) [Cleaved into: Peroxisomal leader peptide-processing protease, 15 kDa form; Peroxisomal leader peptide-processing protease, 45 kDa form]	HP:0000011	Neurogenic bladder	29
1610	P14920	OXDA	D-amino-acid oxidase (DAAO) (DAMOX) (DAO) (EC 1.4.3.3)	HP:0000011	Neurogenic bladder	30
6400	Q9UBV2	SE1L1	Protein sel-1 homolog 1 (Suppressor of lin-12-like protein 1) (Sel-1L)	HP:0000011	Neurogenic bladder	31
26580	Q96G97	BSCL2	Seipin (Bernardinelli-Seip congenital lipodystrophy type 2 protein)	HP:0000011	Neurogenic bladder	32
8878	Q13501	SQSTM	Sequestosome-1 (EBI3-associated protein of 60 kDa) (EBIAP) (p60) (Phosphotyrosine-independent ligand for the Lck SH2 domain of 62 kDa) (Ubiquitin-binding protein p62)	HP:0000011	Neurogenic bladder	33
10371	Q14563	SEM3A	Semaphorin-3A (Semaphorin III) (Sema III)	HP:0000011	Neurogenic bladder	34
79877	Q8WVC6	DCAKD	Dephospho-CoA kinase domain-containing protein	HP:0000011	Neurogenic bladder	35
51555	Q8IYB4	PEX5R	PEX5-related protein (PEX2-related protein) (PEX5-like protein) (Peroxin-5-related protein) (Peroxisome biogenesis factor 5-like) (Tetratricopeptide repeat-containing Rab8b-interacting protein) (Pex5Rp) (TRIP8b)	HP:0000011	Neurogenic bladder	36
9907	O43299	AP5Z1	AP-5 complex subunit zeta-1 (Adaptor-related protein complex 5 zeta subunit) (Zeta5)	HP:0000011	Neurogenic bladder	37
4914	P04629	NTRK1	High affinity nerve growth factor receptor (EC 2.7.10.1) (Neurotrophic tyrosine kinase receptor type 1) (TRK1-transforming tyrosine kinase protein) (Tropomyosin-related kinase A) (Tyrosine kinase receptor) (Tyrosine kinase receptor A) (Trk-A) (gp140trk) (p140-TrkA)	HP:0000011	Neurogenic bladder	38
2065	P21860	ERBB3	Receptor tyrosine-protein kinase erbB-3 (EC 2.7.10.1) (Proto-oncogene-like protein c-ErbB-3) (Tyrosine kinase-type cell surface receptor HER3)	HP:0000011	Neurogenic bladder	39
2932	P49841	GSK3B	Glycogen synthase kinase-3 beta (GSK-3 beta) (EC 2.7.11.26) (Serine/threonine-protein kinase GSK3B) (EC 2.7.11.1)	HP:0000011	Neurogenic bladder	40
7251	Q99816	TS101	Tumor susceptibility gene 101 protein (ESCRT-I complex subunit TSG101)	HP:0000011	Neurogenic bladder	41
11345	P60520	GBRL2	Gamma-aminobutyric acid receptor-associated protein-like 2 (GABA(A) receptor-associated protein-like 2) (Ganglioside expression factor 2) (GEF-2) (General protein transport factor p16) (Golgi-associated ATPase enhancer of 16 kDa) (GATE-16) (MAP1 light chain 3-related protein)	HP:0000011	Neurogenic bladder	42
11152	Q9Y484	WIPI4	WD repeat domain phosphoinositide-interacting protein 4 (WIPI-4) (WD repeat-containing protein 45)	HP:0000011	Neurogenic bladder	43
65018	Q9BXM7	PINK1	Serine/threonine-protein kinase PINK1, mitochondrial (EC 2.7.11.1) (BRPK) (PTEN-induced putative kinase protein 1)	HP:0000011	Neurogenic bladder	44
4976	O60313	OPA1	Dynamin-like 120 kDa protein, mitochondrial (EC 3.6.5.5) (Optic atrophy protein 1) [Cleaved into: Dynamin-like 120 kDa protein, form S1]	HP:0000011	Neurogenic bladder	45
7942	P19484	TFEB	Transcription factor EB (Class E basic helix-loop-helix protein 35) (bHLHe35)	HP:0000011	Neurogenic bladder	46
10299	O60337	MARH6	E3 ubiquitin-protein ligase MARCHF6 (EC 2.3.2.27) (Doa10 homolog) (Membrane-associated RING finger protein 6) (Membrane-associated RING-CH protein VI) (MARCH-VI) (Protein TEB-4) (RING finger protein 176) (RING-type E3 ubiquitin transferase MARCHF6)	HP:0000011	Neurogenic bladder	47
4744	P12036	NFH	Neurofilament heavy polypeptide (NF-H) (200 kDa neurofilament protein) (Neurofilament triplet H protein)	HP:0000011	Neurogenic bladder	48
10956	Q13438	OS9	Protein OS-9 (Amplified in osteosarcoma 9)	HP:0000011	Neurogenic bladder	49
11154	Q9Y587	AP4S1	AP-4 complex subunit sigma-1 (AP-4 adaptor complex subunit sigma-1) (Adaptor-related protein complex 4 subunit sigma-1) (Sigma-1 subunit of AP-4) (Sigma-4-adaptin) (Sigma4-adaptin)	HP:0000011	Neurogenic bladder	50
10478	O43808	PM34	Peroxisomal membrane protein PMP34 (34 kDa peroxisomal membrane protein) (Solute carrier family 25 member 17)	HP:0000011	Neurogenic bladder	51
4359	P25189	MYP0	Myelin protein P0 (Myelin peripheral protein) (MPP) (Myelin protein zero)	HP:0000011	Neurogenic bladder	52
3084	Q02297	NRG1	Pro-neuregulin-1, membrane-bound isoform (Pro-NRG1) [Cleaved into: Neuregulin-1 (Acetylcholine receptor-inducing activity) (ARIA) (Breast cancer cell differentiation factor p45) (Glial growth factor) (Heregulin) (HRG) (Neu differentiation factor) (Sensory and motor neuron-derived factor)]	HP:0000011	Neurogenic bladder	53
10613	O75477	ERLN1	Erlin-1 (Endoplasmic reticulum lipid raft-associated protein 1) (Protein KE04) (Stomatin-prohibitin-flotillin-HflC/K domain-containing protein 1) (SPFH domain-containing protein 1)	HP:0000011	Neurogenic bladder	54
3643	P06213	INSR	Insulin receptor (IR) (EC 2.7.10.1) (CD antigen CD220) [Cleaved into: Insulin receptor subunit alpha; Insulin receptor subunit beta]	HP:0000011	Neurogenic bladder	55
25851	Q7Z6L1	TCPR1	Tectonin beta-propeller repeat-containing protein 1	HP:0000011	Neurogenic bladder	56
79065	Q7Z3C6	ATG9A	Autophagy-related protein 9A (APG9-like 1) (mATG9)	HP:0000011	Neurogenic bladder	57
51009	Q9GZP9	DERL2	Derlin-2 (Degradation in endoplasmic reticulum protein 2) (DERtrin-2) (Der1-like protein 2) (F-LAN-1) (F-LANa)	HP:0000011	Neurogenic bladder	58
5828	P28328	PEX2	Peroxisome biogenesis factor 2 (35 kDa peroxisomal membrane protein) (Peroxin-2) (Peroxisomal membrane protein 3) (Peroxisome assembly factor 1) (PAF-1) (RING finger protein 72)	HP:0000011	Neurogenic bladder	59
55669	Q8IWA4	MFN1	Mitofusin-1 (EC 3.6.5.-) (Fzo homolog) (Transmembrane GTPase MFN1)	HP:0000011	Neurogenic bladder	60
7249	P49815	TSC2	Tuberin (Tuberous sclerosis 2 protein)	HP:0000011	Neurogenic bladder	61
51699	Q9UBQ0	VPS29	Vacuolar protein sorting-associated protein 29 (hVPS29) (PEP11 homolog) (Vesicle protein sorting 29)	HP:0000011	Neurogenic bladder	62
27248	Q96DZ1	ERLEC	Endoplasmic reticulum lectin 1 (ER lectin) (Erlectin) (XTP3-transactivated gene B protein)	HP:0000011	Neurogenic bladder	63
4804	P08138	TNR16	Tumor necrosis factor receptor superfamily member 16 (Gp80-LNGFR) (Low affinity neurotrophin receptor p75NTR) (Low-affinity nerve growth factor receptor) (NGF receptor) (p75 ICD) (CD antigen CD271)	HP:0000011	Neurogenic bladder	64
9101	P40818	UBP8	Ubiquitin carboxyl-terminal hydrolase 8 (EC 3.4.19.12) (Deubiquitinating enzyme 8) (Ubiquitin isopeptidase Y) (hUBPy) (Ubiquitin thioesterase 8) (Ubiquitin-specific-processing protease 8)	HP:0000011	Neurogenic bladder	65
9197	O00400	ACATN	Acetyl-coenzyme A transporter 1 (AT-1) (Acetyl-CoA transporter 1) (Solute carrier family 33 member 1)	HP:0000011	Neurogenic bladder	66
23259	O94830	DDHD2	Phospholipase DDHD2 (EC 3.1.1.-) (DDHD domain-containing protein 2) (KIAA0725p) (SAM, WWE and DDHD domain-containing protein 1)	HP:0000011	Neurogenic bladder	67
5194	Q92968	PEX13	Peroxisomal membrane protein PEX13 (Peroxin-13)	HP:0000011	Neurogenic bladder	68
9909	O75064	DEN4B	DENN domain-containing protein 4B	HP:0000011	Neurogenic bladder	69
3064	P42858	HD	Huntingtin (Huntington disease protein) (HD protein) [Cleaved into: Huntingtin, myristoylated N-terminal fragment]	HP:0000011	Neurogenic bladder	70
25978	Q9UQN3	CHM2B	Charged multivesicular body protein 2b (CHMP2.5) (Chromatin-modifying protein 2b) (CHMP2b) (Vacuolar protein sorting-associated protein 2-2) (Vps2-2) (hVps2-2)	HP:0000011	Neurogenic bladder	71
10015	Q8WUM4	PDC6I	Programmed cell death 6-interacting protein (PDCD6-interacting protein) (ALG-2-interacting protein 1) (ALG-2-interacting protein X) (Hp95)	HP:0000011	Neurogenic bladder	72
11337	O95166	GBRAP	Gamma-aminobutyric acid receptor-associated protein (GABA(A) receptor-associated protein) (MM46)	HP:0000011	Neurogenic bladder	73
7415	P55072	TERA	Transitional endoplasmic reticulum ATPase (TER ATPase) (EC 3.6.4.6) (15S Mg(2+)-ATPase p97 subunit) (Valosin-containing protein) (VCP)	HP:0000011	Neurogenic bladder	74
84896	Q8NBU5	ATAD1	Outer mitochondrial transmembrane helix translocase (EC 7.4.2.-) (ATPase family AAA domain-containing protein 1) (hATAD1) (Thorase)	HP:0000011	Neurogenic bladder	75
11060	O00308	WWP2	NEDD4-like E3 ubiquitin-protein ligase WWP2 (EC 2.3.2.26) (Atrophin-1-interacting protein 2) (AIP2) (HECT-type E3 ubiquitin transferase WWP2) (WW domain-containing protein 2)	HP:0000011	Neurogenic bladder	76
26063	Q9NUI1	DECR2	Peroxisomal 2,4-dienoyl-CoA reductase [(3E)-enoyl-CoA-producing] (pDCR) (EC 1.3.1.124) (2,4-dienoyl-CoA reductase 2) (Short chain dehydrogenase/reductase family 17C member 1)	HP:0000011	Neurogenic bladder	77
92960	Q96HA9	PX11C	Peroxisomal membrane protein 11C (Peroxin-11C) (Peroxisomal biogenesis factor 11C) (Protein PEX11 homolog gamma) (PEX11-gamma)	HP:0000011	Neurogenic bladder	78
9829	O75061	AUXI	Putative tyrosine-protein phosphatase auxilin (EC 3.1.3.48) (DnaJ homolog subfamily C member 6)	HP:0000011	Neurogenic bladder	79
23710	Q9H0R8	GBRL1	Gamma-aminobutyric acid receptor-associated protein-like 1 (Early estrogen-regulated protein) (GABA(A) receptor-associated protein-like 1) (Glandular epithelial cell protein 1) (GEC-1)	HP:0000011	Neurogenic bladder	80
83752	Q86WA8	LONP2	Lon protease homolog 2, peroxisomal (EC 3.4.21.53) (Lon protease-like protein 2) (Lon protease 2) (Peroxisomal Lon protease) (pLon)	HP:0000011	Neurogenic bladder	81
5195	O75381	PEX14	Peroxisomal membrane protein PEX14 (PTS1 receptor-docking protein) (Peroxin-14) (Peroxisomal membrane anchor protein PEX14)	HP:0000011	Neurogenic bladder	82
137492	Q8NEZ2	VP37A	Vacuolar protein sorting-associated protein 37A (hVps37A) (ESCRT-I complex subunit VPS37A) (Hepatocellular carcinoma-related protein 1)	HP:0000011	Neurogenic bladder	83
1103	P28329	CLAT	Choline O-acetyltransferase (CHOACTase) (ChAT) (Choline acetylase) (EC 2.3.1.6)	HP:0000011	Neurogenic bladder	84
10531	Q5JRX3	PREP	Presequence protease, mitochondrial (hPreP) (EC 3.4.24.-) (Pitrilysin metalloproteinase 1) (Metalloprotease 1) (hMP1)	HP:0000011	Neurogenic bladder	85
1948	P52799	EFNB2	Ephrin-B2 (EPH-related receptor tyrosine kinase ligand 5) (LERK-5) (HTK ligand) (HTK-L)	HP:0000011	Neurogenic bladder	86
51360	O43462	MBTP2	Membrane-bound transcription factor site-2 protease (EC 3.4.24.85) (Endopeptidase S2P) (Sterol regulatory element-binding proteins intramembrane protease) (SREBPs intramembrane protease)	HP:0000011	Neurogenic bladder	87
8050	O00330	ODPX	Pyruvate dehydrogenase protein X component, mitochondrial (Dihydrolipoamide dehydrogenase-binding protein of pyruvate dehydrogenase complex) (E3-binding protein) (E3BP) (Lipoyl-containing pyruvate dehydrogenase complex component X) (proX)	HP:0000011	Neurogenic bladder	88
10059	O00429	DNM1L	Dynamin-1-like protein (EC 3.6.5.5) (Dnm1p/Vps1p-like protein) (DVLP) (Dynamin family member proline-rich carboxyl-terminal domain less) (Dymple) (Dynamin-like protein) (Dynamin-like protein 4) (Dynamin-like protein IV) (HdynIV) (Dynamin-related protein 1)	HP:0000011	Neurogenic bladder	89
25820	Q9Y4X5	ARI1	E3 ubiquitin-protein ligase ARIH1 (EC 2.3.2.31) (H7-AP2) (HHARI) (Monocyte protein 6) (MOP-6) (Protein ariadne-1 homolog) (ARI-1) (UbcH7-binding protein) (UbcM4-interacting protein) (Ubiquitin-conjugating enzyme E2-binding protein 1)	HP:0000011	Neurogenic bladder	90
5825	P28288	ABCD3	ATP-binding cassette sub-family D member 3 (70 kDa peroxisomal membrane protein) (PMP70)	HP:0000011	Neurogenic bladder	91
4803	P01138	NGF	Beta-nerve growth factor (Beta-NGF)	HP:0000011	Neurogenic bladder	92
23673	Q86Y82	STX12	Syntaxin-12	HP:0000011	Neurogenic bladder	93
55268	Q86YB7	ECHD2	Enoyl-CoA hydratase domain-containing protein 2, mitochondrial	HP:0000011	Neurogenic bladder	94
203228	Q96LT7	CI072	Guanine nucleotide exchange C9orf72	HP:0000011	Neurogenic bladder	95
123606	Q7RTP0	NIPA1	Magnesium transporter NIPA1 (Non-imprinted in Prader-Willi/Angelman syndrome region protein 1) (Spastic paraplegia 6 protein)	HP:0000011	Neurogenic bladder	96
23317	O75165	DJC13	DnaJ homolog subfamily C member 13 (Required for receptor-mediated endocytosis 8) (RME-8)	HP:0000011	Neurogenic bladder	97
55711	Q96K12	FACR2	Fatty acyl-CoA reductase 2 (EC 1.2.1.84) (Male sterility domain-containing protein 1)	HP:0000011	Neurogenic bladder	98
53349	Q9HBF4	ZFYV1	Zinc finger FYVE domain-containing protein 1 (Double FYVE-containing protein 1) (SR3) (Tandem FYVE fingers-1)	HP:0000011	Neurogenic bladder	99
54677	Q9UKG9	OCTC	Peroxisomal carnitine O-octanoyltransferase (COT) (EC 2.3.1.137)	HP:0000011	Neurogenic bladder	100
57679	Q96Q42	ALS2	Alsin (Amyotrophic lateral sclerosis 2 chromosomal region candidate gene 6 protein) (Amyotrophic lateral sclerosis 2 protein)	HP:0000011	Neurogenic bladder	101
9373	Q9Y263	PLAP	Phospholipase A-2-activating protein (PLA2P) (PLAP)	HP:0000011	Neurogenic bladder	102
91319	Q96Q80	DERL3	Derlin-3 (Degradation in endoplasmic reticulum protein 3) (DERtrin-3) (Der1-like protein 3)	HP:0000011	Neurogenic bladder	103
9342	O95721	SNP29	Synaptosomal-associated protein 29 (SNAP-29) (Soluble 29 kDa NSF attachment protein) (Vesicle-membrane fusion protein SNAP-29)	HP:0000011	Neurogenic bladder	104
55825	Q9BY49	PECR	Peroxisomal trans-2-enoyl-CoA reductase (TERP) (EC 1.3.1.38) (2,4-dienoyl-CoA reductase-related protein) (DCR-RP) (HPDHase) (Short chain dehydrogenase/reductase family 29C member 1) (pVI-ARL)	HP:0000011	Neurogenic bladder	105
11343	Q99685	MGLL	Monoglyceride lipase (MGL) (EC 3.1.1.23) (HU-K5) (Lysophospholipase homolog) (Lysophospholipase-like) (Monoacylglycerol lipase) (MAGL)	HP:0000011	Neurogenic bladder	106
2260	P11362	FGFR1	Fibroblast growth factor receptor 1 (FGFR-1) (EC 2.7.10.1) (Basic fibroblast growth factor receptor 1) (BFGFR) (bFGF-R-1) (Fms-like tyrosine kinase 2) (FLT-2) (N-sam) (Proto-oncogene c-Fgr) (CD antigen CD331)	HP:0000011	Neurogenic bladder	107
10423	O14735	CDIPT	CDP-diacylglycerol--inositol 3-phosphatidyltransferase (EC 2.7.8.11) (Phosphatidylinositol synthase) (PI synthase) (PtdIns synthase)	HP:0000011	Neurogenic bladder	108
51257	Q9P0N8	MARH2	E3 ubiquitin-protein ligase MARCHF2 (EC 2.3.2.27) (Membrane-associated RING finger protein 2) (Membrane-associated RING-CH protein II) (MARCH-II) (RING finger protein 172) (RING-type E3 ubiquitin transferase MARCHF2)	HP:0000011	Neurogenic bladder	109
10005	O14734	ACOT8	Acyl-coenzyme A thioesterase 8 (Acyl-CoA thioesterase 8) (EC 3.1.2.1) (EC 3.1.2.11) (EC 3.1.2.2) (EC 3.1.2.3) (EC 3.1.2.5) (Choloyl-coenzyme A thioesterase) (EC 3.1.2.27) (HIV-Nef-associated acyl-CoA thioesterase) (Peroxisomal acyl-CoA thioesterase 2) (PTE-2) (Peroxisomal acyl-coenzyme A thioester hydrolase 1) (PTE-1) (Peroxisomal long-chain acyl-CoA thioesterase 1) (Thioesterase II) (hACTE-III) …	HP:0000011	Neurogenic bladder	110
23230	Q96RL7	VP13A	Vacuolar protein sorting-associated protein 13A (Chorea-acanthocytosis protein) (Chorein)	HP:0000011	Neurogenic bladder	111
6272	Q99523	SORT	Sortilin (100 kDa NT receptor) (Glycoprotein 95) (Gp95) (Neurotensin receptor 3) (NT3) (NTR3)	HP:0000011	Neurogenic bladder	112
10505	O95754	SEM4F	Semaphorin-4F (Semaphorin-M) (Sema M) (Semaphorin-W) (Sema W)	HP:0000011	Neurogenic bladder	113
23205	Q96GR2	ACBG1	Long-chain-fatty-acid--CoA ligase ACSBG1 (EC 6.2.1.3) (Acyl-CoA synthetase bubblegum family member 1) (hBG1) (hsBG) (hsBGM) (Lipidosin)	HP:0000011	Neurogenic bladder	114
225	Q9UBJ2	ABCD2	ATP-binding cassette sub-family D member 2 (Adrenoleukodystrophy-like 1) (Adrenoleukodystrophy-related protein) (hALDR)	HP:0000011	Neurogenic bladder	115
51652	Q9Y3E7	CHMP3	Charged multivesicular body protein 3 (Chromatin-modifying protein 3) (Neuroendocrine differentiation factor) (Vacuolar protein sorting-associated protein 24) (hVps24)	HP:0000011	Neurogenic bladder	116
79158	Q3T906	GNPTA	N-acetylglucosamine-1-phosphotransferase subunits alpha/beta (EC 2.7.8.17) (GlcNAc-1-phosphotransferase subunits alpha/beta) (Stealth protein GNPTAB) (UDP-N-acetylglucosamine-1-phosphotransferase subunits alpha/beta) [Cleaved into: N-acetylglucosamine-1-phosphotransferase subunit alpha; N-acetylglucosamine-1-phosphotransferase subunit beta]	HP:0000011	Neurogenic bladder	117
10509	Q9NPR2	SEM4B	Semaphorin-4B (Semaphorin-C)	HP:0000011	Neurogenic bladder	118
55293	Q8IX04	UEVLD	Ubiquitin-conjugating enzyme E2 variant 3 (UEV-3) (EV and lactate/malate dehydrogenase domain-containing protein)	HP:0000011	Neurogenic bladder	119
4287	P54252	ATX3	Ataxin-3 (EC 3.4.19.12) (Machado-Joseph disease protein 1) (Spinocerebellar ataxia type 3 protein)	HP:0000011	Neurogenic bladder	120
10157	Q9UDR5	AASS	Alpha-aminoadipic semialdehyde synthase, mitochondrial (LKR/SDH) [Includes: Lysine ketoglutarate reductase (LKR) (LOR) (EC 1.5.1.8); Saccharopine dehydrogenase (SDH) (EC 1.5.1.9)]	HP:0000011	Neurogenic bladder	121
9217	O95292	VAPB	Vesicle-associated membrane protein-associated protein B/C (VAMP-B/VAMP-C) (VAMP-associated protein B/C) (VAP-B/VAP-C)	HP:0000011	Neurogenic bladder	122
8443	O15228	GNPAT	Dihydroxyacetone phosphate acyltransferase (DAP-AT) (DHAP-AT) (EC 2.3.1.42) (Acyl-CoA:dihydroxyacetonephosphateacyltransferase) (Glycerone-phosphate O-acyltransferase)	HP:0000011	Neurogenic bladder	123
80124	Q96JH7	VCIP1	Deubiquitinating protein VCPIP1 (EC 3.4.19.12) (Valosin-containing protein p97/p47 complex-interacting protein 1) (Valosin-containing protein p97/p47 complex-interacting protein p135) (VCP/p47 complex-interacting 135-kDa protein)	HP:0000011	Neurogenic bladder	124
10512	Q99985	SEM3C	Semaphorin-3C (Semaphorin-E) (Sema E)	HP:0000011	Neurogenic bladder	125
79139	Q9BUN8	DERL1	Derlin-1 (Degradation in endoplasmic reticulum protein 1) (DERtrin-1) (Der1-like protein 1)	HP:0000011	Neurogenic bladder	126
215	P33897	ABCD1	ATP-binding cassette sub-family D member 1 (EC 7.6.2.4) (Adrenoleukodystrophy protein) (ALDP)	HP:0000011	Neurogenic bladder	127
2261	P22607	FGFR3	Fibroblast growth factor receptor 3 (FGFR-3) (EC 2.7.10.1) (CD antigen CD333)	HP:0000011	Neurogenic bladder	128
23190	Q92575	UBXN4	UBX domain-containing protein 4 (Erasin) (UBX domain-containing protein 2)	HP:0000011	Neurogenic bladder	129
2731	P23378	GCSP	Glycine dehydrogenase (decarboxylating), mitochondrial (EC 1.4.4.2) (Glycine cleavage system P protein) (Glycine decarboxylase) (Glycine dehydrogenase (aminomethyl-transferring))	HP:0000011	Neurogenic bladder	130
440738	Q9BXW4	MLP3C	Microtubule-associated proteins 1A/1B light chain 3C (Autophagy-related protein LC3 C) (Autophagy-related ubiquitin-like modifier LC3 C) (MAP1 light chain 3-like protein 3) (MAP1A/MAP1B light chain 3 C) (MAP1A/MAP1B LC3 C) (Microtubule-associated protein 1 light chain 3 gamma)	HP:0000011	Neurogenic bladder	131
139341	Q8IVP5	FUND1	FUN14 domain-containing protein 1	HP:0000011	Neurogenic bladder	132
54963	Q9NWZ5	UCKL1	Uridine-cytidine kinase-like 1 (EC 2.7.1.48)	HP:0000011	Neurogenic bladder	133
8411	Q15075	EEA1	Early endosome antigen 1 (Endosome-associated protein p162) (Zinc finger FYVE domain-containing protein 2)	HP:0000011	Neurogenic bladder	134
55737	Q96QK1	VPS35	Vacuolar protein sorting-associated protein 35 (hVPS35) (Maternal-embryonic 3) (Vesicle protein sorting 35)	HP:0000011	Neurogenic bladder	135
9897	Q12768	WASC5	WASH complex subunit 5 (Strumpellin) (WASH complex subunit strumpellin)	HP:0000011	Neurogenic bladder	136
23761	Q9UG56	PISD	Phosphatidylserine decarboxylase proenzyme, mitochondrial (EC 4.1.1.65) [Cleaved into: Phosphatidylserine decarboxylase beta chain; Phosphatidylserine decarboxylase alpha chain]	HP:0000011	Neurogenic bladder	137
9776	O75143	ATG13	Autophagy-related protein 13	HP:0000011	Neurogenic bladder	138
55823	Q9H270	VPS11	Vacuolar protein sorting-associated protein 11 homolog (hVPS11) (RING finger protein 108)	HP:0000011	Neurogenic bladder	139
9179	O00189	AP4M1	AP-4 complex subunit mu-1 (AP-4 adaptor complex mu subunit) (Adaptor-related protein complex 4 subunit mu-1) (Mu subunit of AP-4) (Mu-adaptin-related protein 2) (mu-ARP2) (Mu4-adaptin) (mu4)	HP:0000011	Neurogenic bladder	140
55014	P56962	STX17	Syntaxin-17	HP:0000011	Neurogenic bladder	141
5830	P50542	PEX5	Peroxisomal targeting signal 1 receptor (PTS1 receptor) (PTS1R) (PTS1-BP) (Peroxin-5) (Peroxisomal C-terminal targeting signal import receptor) (Peroxisome receptor 1)	HP:0000011	Neurogenic bladder	142
80221	Q96CM8	ACSF2	Medium-chain acyl-CoA ligase ACSF2, mitochondrial (EC 6.2.1.2)	HP:0000011	Neurogenic bladder	143
2264	P22455	FGFR4	Fibroblast growth factor receptor 4 (FGFR-4) (EC 2.7.10.1) (CD antigen CD334)	HP:0000011	Neurogenic bladder	144
4763	P21359	NF1	Neurofibromin (Neurofibromatosis-related protein NF-1) [Cleaved into: Neurofibromin truncated]	HP:0000011	Neurogenic bladder	145
4137	P10636	TAU	Microtubule-associated protein tau (Neurofibrillary tangle protein) (Paired helical filament-tau) (PHF-tau)	HP:0000011	Neurogenic bladder	146
57165	Q5T442	CXG2	Gap junction gamma-2 protein (Connexin-46.6) (Cx46.6) (Connexin-47) (Cx47) (Gap junction alpha-12 protein)	HP:0000011	Neurogenic bladder	147
55229	Q9NVE7	PANK4	4'-phosphopantetheine phosphatase (EC 3.1.3.-) (Inactive pantothenic acid kinase 4) (hPanK4)	HP:0000011	Neurogenic bladder	148
9453	O95749	GGPPS	Geranylgeranyl pyrophosphate synthase (GGPP synthase) (GGPPSase) (EC 2.5.1.-) ((2E,6E)-farnesyl diphosphate synthase) (Dimethylallyltranstransferase) (EC 2.5.1.1) (Farnesyl diphosphate synthase) (Farnesyltranstransferase) (EC 2.5.1.29) (Geranylgeranyl diphosphate synthase) (Geranyltranstransferase) (EC 2.5.1.10)	HP:0000011	Neurogenic bladder	149
9409	Q9Y5Y5	PEX16	Peroxisomal membrane protein PEX16 (Peroxin-16) (Peroxisomal biogenesis factor 16)	HP:0000011	Neurogenic bladder	150
80208	Q96JI7	SPTCS	Spatacsin (Colorectal carcinoma-associated protein) (Spastic paraplegia 11 protein)	HP:0000012	Urinary urgency	1
9895	O15040	TCPR2	Tectonin beta-propeller repeat-containing protein 2 (WD repeat-containing protein KIAA0329/KIAA0297)	HP:0000012	Urinary urgency	2
9927	O95140	MFN2	Mitofusin-2 (EC 3.6.5.-) (Transmembrane GTPase MFN2)	HP:0000012	Urinary urgency	3
23317	O75165	DJC13	DnaJ homolog subfamily C member 13 (Required for receptor-mediated endocytosis 8) (RME-8)	HP:0000012	Urinary urgency	4
10908	Q8IY17	PLPL6	Patatin-like phospholipase domain-containing protein 6 (EC 3.1.1.5) (Neuropathy target esterase)	HP:0000012	Urinary urgency	5
4287	P54252	ATX3	Ataxin-3 (EC 3.4.19.12) (Machado-Joseph disease protein 1) (Spinocerebellar ataxia type 3 protein)	HP:0000012	Urinary urgency	6
6683	Q9UBP0	SPAST	Spastin (EC 5.6.1.1) (Spastic paraplegia 4 protein)	HP:0000012	Urinary urgency	7
9907	O43299	AP5Z1	AP-5 complex subunit zeta-1 (Adaptor-related protein complex 5 zeta subunit) (Zeta5)	HP:0000012	Urinary urgency	8
547	Q12756	KIF1A	Kinesin-like protein KIF1A (Axonal transporter of synaptic vesicles) (Microtubule-based motor KIF1A) (Unc-104- and KIF1A-related protein) (hUnc-104)	HP:0000012	Urinary urgency	9
26278	Q9NZJ4	SACS	Sacsin (DnaJ homolog subfamily C member 29) (DNAJC29)	HP:0000012	Urinary urgency	10
6311	Q99700	ATX2	Ataxin-2 (Spinocerebellar ataxia type 2 protein) (Trinucleotide repeat-containing gene 13 protein)	HP:0000012	Urinary urgency	11
26580	Q96G97	BSCL2	Seipin (Bernardinelli-Seip congenital lipodystrophy type 2 protein)	HP:0000012	Urinary urgency	12
3798	Q12840	KIF5A	Kinesin heavy chain isoform 5A (Kinesin heavy chain neuron-specific 1) (Neuronal kinesin heavy chain) (NKHC)	HP:0000012	Urinary urgency	13
65018	Q9BXM7	PINK1	Serine/threonine-protein kinase PINK1, mitochondrial (EC 2.7.11.1) (BRPK) (PTEN-induced putative kinase protein 1)	HP:0000012	Urinary urgency	14
23431	Q9UPM8	AP4E1	AP-4 complex subunit epsilon-1 (AP-4 adaptor complex subunit epsilon) (Adaptor-related protein complex 4 subunit epsilon-1) (Epsilon subunit of AP-4) (Epsilon-adaptin)	HP:0000012	Urinary urgency	15
7415	P55072	TERA	Transitional endoplasmic reticulum ATPase (TER ATPase) (EC 3.6.4.6) (15S Mg(2+)-ATPase p97 subunit) (Valosin-containing protein) (VCP)	HP:0000012	Urinary urgency	16
23503	Q68DK2	ZFY26	Zinc finger FYVE domain-containing protein 26 (FYVE domain-containing centrosomal protein) (FYVE-CENT) (Spastizin)	HP:0000012	Urinary urgency	17
11154	Q9Y587	AP4S1	AP-4 complex subunit sigma-1 (AP-4 adaptor complex subunit sigma-1) (Adaptor-related protein complex 4 subunit sigma-1) (Sigma-1 subunit of AP-4) (Sigma-4-adaptin) (Sigma4-adaptin)	HP:0000012	Urinary urgency	18
137492	Q8NEZ2	VP37A	Vacuolar protein sorting-associated protein 37A (hVps37A) (ESCRT-I complex subunit VPS37A) (Hepatocellular carcinoma-related protein 1)	HP:0000012	Urinary urgency	19
51062	Q8WXF7	ATLA1	Atlastin-1 (EC 3.6.5.-) (Brain-specific GTP-binding protein) (GTP-binding protein 3) (GBP-3) (hGBP3) (Guanine nucleotide-binding protein 3) (Spastic paraplegia 3 protein A)	HP:0000012	Urinary urgency	20
10059	O00429	DNM1L	Dynamin-1-like protein (EC 3.6.5.5) (Dnm1p/Vps1p-like protein) (DVLP) (Dynamin family member proline-rich carboxyl-terminal domain less) (Dymple) (Dynamin-like protein) (Dynamin-like protein 4) (Dynamin-like protein IV) (HdynIV) (Dynamin-related protein 1)	HP:0000012	Urinary urgency	21
57679	Q96Q42	ALS2	Alsin (Amyotrophic lateral sclerosis 2 chromosomal region candidate gene 6 protein) (Amyotrophic lateral sclerosis 2 protein)	HP:0000012	Urinary urgency	22
3064	P42858	HD	Huntingtin (Huntington disease protein) (HD protein) [Cleaved into: Huntingtin, myristoylated N-terminal fragment]	HP:0000012	Urinary urgency	23
118813	Q5T4F4	ZFY27	Protrudin (Spastic paraplegia 33 protein) (Zinc finger FYVE domain-containing protein 27)	HP:0000012	Urinary urgency	24
10939	Q9Y4W6	AFG32	AFG3-like protein 2 (EC 3.4.24.-) (Paraplegin-like protein)	HP:0000012	Urinary urgency	25
57165	Q5T442	CXG2	Gap junction gamma-2 protein (Connexin-46.6) (Cx46.6) (Connexin-47) (Cx47) (Gap junction alpha-12 protein)	HP:0000012	Urinary urgency	26
4744	P12036	NFH	Neurofilament heavy polypeptide (NF-H) (200 kDa neurofilament protein) (Neurofilament triplet H protein)	HP:0000012	Urinary urgency	27
9897	Q12768	WASC5	WASH complex subunit 5 (Strumpellin) (WASH complex subunit strumpellin)	HP:0000012	Urinary urgency	28
23710	Q9H0R8	GBRL1	Gamma-aminobutyric acid receptor-associated protein-like 1 (Early estrogen-regulated protein) (GABA(A) receptor-associated protein-like 1) (Glandular epithelial cell protein 1) (GEC-1)	HP:0000012	Urinary urgency	29
54832	Q709C8	VP13C	Vacuolar protein sorting-associated protein 13C	HP:0000012	Urinary urgency	30
4137	P10636	TAU	Microtubule-associated protein tau (Neurofibrillary tangle protein) (Paired helical filament-tau) (PHF-tau)	HP:0000012	Urinary urgency	31
11345	P60520	GBRL2	Gamma-aminobutyric acid receptor-associated protein-like 2 (GABA(A) receptor-associated protein-like 2) (Ganglioside expression factor 2) (GEF-2) (General protein transport factor p16) (Golgi-associated ATPase enhancer of 16 kDa) (GATE-16) (MAP1 light chain 3-related protein)	HP:0000012	Urinary urgency	32
4976	O60313	OPA1	Dynamin-like 120 kDa protein, mitochondrial (EC 3.6.5.5) (Optic atrophy protein 1) [Cleaved into: Dynamin-like 120 kDa protein, form S1]	HP:0000012	Urinary urgency	33
51324	Q9NZD8	SPG21	Maspardin (Acid cluster protein 33) (Spastic paraplegia 21 autosomal recessive Mast syndrome protein) (Spastic paraplegia 21 protein)	HP:0000012	Urinary urgency	34
80821	Q8NEL9	DDHD1	Phospholipase DDHD1 (EC 3.1.1.-) (DDHD domain-containing protein 1) (Phosphatidic acid-preferring phospholipase A1 homolog) (PA-PLA1)	HP:0000012	Urinary urgency	35
123606	Q7RTP0	NIPA1	Magnesium transporter NIPA1 (Non-imprinted in Prader-Willi/Angelman syndrome region protein 1) (Spastic paraplegia 6 protein)	HP:0000012	Urinary urgency	36
8878	Q13501	SQSTM	Sequestosome-1 (EBI3-associated protein of 60 kDa) (EBIAP) (p60) (Phosphotyrosine-independent ligand for the Lck SH2 domain of 62 kDa) (Ubiquitin-binding protein p62)	HP:0000012	Urinary urgency	37
23259	O94830	DDHD2	Phospholipase DDHD2 (EC 3.1.1.-) (DDHD domain-containing protein 2) (KIAA0725p) (SAM, WWE and DDHD domain-containing protein 1)	HP:0000012	Urinary urgency	38
83636	Q9NSK7	CS012	Protein C19orf12	HP:0000012	Urinary urgency	39
23130	Q2TAZ0	ATG2A	Autophagy-related protein 2 homolog A	HP:0000012	Urinary urgency	40
25814	Q9UBB4	ATX10	Ataxin-10 (Brain protein E46 homolog) (Spinocerebellar ataxia type 10 protein)	HP:0000012	Urinary urgency	41
203228	Q96LT7	CI072	Guanine nucleotide exchange C9orf72	HP:0000012	Urinary urgency	42
11337	O95166	GBRAP	Gamma-aminobutyric acid receptor-associated protein (GABA(A) receptor-associated protein) (MM46)	HP:0000012	Urinary urgency	43
57469	Q9ULN7	PNM8B	Paraneoplastic antigen-like protein 8B (PNMA-like protein 2)	HP:0000012	Urinary urgency	44
55669	Q8IWA4	MFN1	Mitofusin-1 (EC 3.6.5.-) (Fzo homolog) (Transmembrane GTPase MFN1)	HP:0000012	Urinary urgency	45
22	O75027	ABCB7	ATP-binding cassette sub-family B member 7, mitochondrial (ATP-binding cassette transporter 7) (ABC transporter 7 protein)	HP:0000012	Urinary urgency	46
56652	Q96RR1	PEO1	Twinkle protein, mitochondrial (EC 3.6.4.12) (Progressive external ophthalmoplegia 1 protein) (T7 gp4-like protein with intramitochondrial nucleoid localization) (T7-like mitochondrial DNA helicase) (Twinkle mtDNA helicase)	HP:0000012	Urinary urgency	47
5428	P54098	DPOG1	DNA polymerase subunit gamma-1 (EC 2.7.7.7) (Mitochondrial DNA polymerase catalytic subunit) (PolG-alpha)	HP:0000012	Urinary urgency	48
2618	P22102	PUR2	Trifunctional purine biosynthetic protein adenosine-3 [Includes: Phosphoribosylamine--glycine ligase (EC 6.3.4.13) (Glycinamide ribonucleotide synthetase) (GARS) (Phosphoribosylglycinamide synthetase); Phosphoribosylformylglycinamidine cyclo-ligase (EC 6.3.3.1) (AIR synthase) (AIRS) (Phosphoribosyl-aminoimidazole synthetase); Phosphoribosylglycinamide formyltransferase (EC 2.1.2.2) (5'-phosphorib…	HP:0000012	Urinary urgency	49
9217	O95292	VAPB	Vesicle-associated membrane protein-associated protein B/C (VAMP-B/VAMP-C) (VAMP-associated protein B/C) (VAP-B/VAP-C)	HP:0000012	Urinary urgency	50
3309	P11021	BIP	Endoplasmic reticulum chaperone BiP (EC 3.6.4.10) (78 kDa glucose-regulated protein) (GRP-78) (Binding-immunoglobulin protein) (BiP) (Heat shock protein 70 family protein 5) (HSP70 family protein 5) (Heat shock protein family A member 5) (Immunoglobulin heavy chain-binding protein)	HP:0000012	Urinary urgency	51
6647	P00441	SODC	Superoxide dismutase [Cu-Zn] (EC 1.15.1.1) (Superoxide dismutase 1) (hSod1)	HP:0000012	Urinary urgency	52
6622	P37840	SYUA	Alpha-synuclein (Non-A beta component of AD amyloid) (Non-A4 component of amyloid precursor) (NACP)	HP:0000012	Urinary urgency	53
3308	P34932	HSP74	Heat shock 70 kDa protein 4 (HSP70RY) (Heat shock 70-related protein APG-2)	HP:0000012	Urinary urgency	54
56997	Q8NI60	COQ8A	Atypical kinase COQ8A, mitochondrial (EC 2.7.-.-) (Chaperone activity of bc1 complex-like) (Chaperone-ABC1-like) (Coenzyme Q protein 8A) (aarF domain-containing protein kinase 3)	HP:0000012	Urinary urgency	55
23230	Q96RL7	VP13A	Vacuolar protein sorting-associated protein 13A (Chorea-acanthocytosis protein) (Chorein)	HP:0000012	Urinary urgency	56
440738	Q9BXW4	MLP3C	Microtubule-associated proteins 1A/1B light chain 3C (Autophagy-related protein LC3 C) (Autophagy-related ubiquitin-like modifier LC3 C) (MAP1 light chain 3-like protein 3) (MAP1A/MAP1B light chain 3 C) (MAP1A/MAP1B LC3 C) (Microtubule-associated protein 1 light chain 3 gamma)	HP:0000012	Urinary urgency	57
8678	Q14457	BECN1	Beclin-1 (Coiled-coil myosin-like BCL2-interacting protein) (Protein GT197) [Cleaved into: Beclin-1-C 35 kDa; Beclin-1-C 37 kDa]	HP:0000012	Urinary urgency	58
57505	Q5JTZ9	SYAM	Alanine--tRNA ligase, mitochondrial (EC 6.1.1.7) (Alanyl-tRNA synthetase) (AlaRS)	HP:0000012	Urinary urgency	59
10717	Q9Y6B7	AP4B1	AP-4 complex subunit beta-1 (AP-4 adaptor complex subunit beta) (Adaptor-related protein complex 4 subunit beta-1) (Beta subunit of AP-4) (Beta4-adaptin)	HP:0000012	Urinary urgency	60
11152	Q9Y484	WIPI4	WD repeat domain phosphoinositide-interacting protein 4 (WIPI-4) (WD repeat-containing protein 45)	HP:0000012	Urinary urgency	61
6687	Q9UQ90	SPG7	Paraplegin (EC 3.4.24.-) (Cell matrix adhesion regulator) (Spastic paraplegia 7 protein)	HP:0000012	Urinary urgency	62
196513	Q8IZD4	DCP1B	mRNA-decapping enzyme 1B (EC 3.-.-.-)	HP:0000012	Urinary urgency	63
10531	Q5JRX3	PREP	Presequence protease, mitochondrial (hPreP) (EC 3.4.24.-) (Pitrilysin metalloproteinase 1) (Metalloprotease 1) (hMP1)	HP:0000012	Urinary urgency	64
25978	Q9UQN3	CHM2B	Charged multivesicular body protein 2b (CHMP2.5) (Chromatin-modifying protein 2b) (CHMP2b) (Vacuolar protein sorting-associated protein 2-2) (Vps2-2) (hVps2-2)	HP:0000012	Urinary urgency	65
2580	O14976	GAK	Cyclin-G-associated kinase (EC 2.7.11.1)	HP:0000012	Urinary urgency	66
6616	P60880	SNP25	Synaptosomal-associated protein 25 (SNAP-25) (Super protein) (SUP) (Synaptosomal-associated 25 kDa protein)	HP:0000012	Urinary urgency	67
54332	Q8TB36	GDAP1	Ganglioside-induced differentiation-associated protein 1 (GDAP1)	HP:0000012	Urinary urgency	68
11160	O94905	ERLN2	Erlin-2 (Endoplasmic reticulum lipid raft-associated protein 2) (Stomatin-prohibitin-flotillin-HflC/K domain-containing protein 2) (SPFH domain-containing protein 2)	HP:0000012	Urinary urgency	69
25782	Q9H2M9	RBGPR	Rab3 GTPase-activating protein non-catalytic subunit (RGAP-iso) (Rab3 GTPase-activating protein 150 kDa subunit) (Rab3-GAP p150) (Rab3-GAP150) (Rab3-GAP regulatory subunit)	HP:0000012	Urinary urgency	70
10277	O95155	UBE4B	Ubiquitin conjugation factor E4 B (EC 2.3.2.27) (Homozygously deleted in neuroblastoma 1) (RING-type E3 ubiquitin transferase E4 B) (Ubiquitin fusion degradation protein 2)	HP:0000012	Urinary urgency	71
7879	P51149	RAB7A	Ras-related protein Rab-7a (EC 3.6.5.2)	HP:0000012	Urinary urgency	72
23197	Q96CS3	FAF2	FAS-associated factor 2 (Protein ETEA) (UBX domain-containing protein 3B) (UBX domain-containing protein 8)	HP:0000012	Urinary urgency	73
9474	Q9H1Y0	ATG5	Autophagy protein 5 (APG5-like) (Apoptosis-specific protein)	HP:0000012	Urinary urgency	74
2395	Q16595	FRDA	Frataxin, mitochondrial (EC 1.16.3.1) (Friedreich ataxia protein) (Fxn) [Cleaved into: Frataxin intermediate form (i-FXN); Frataxin(56-210) (m56-FXN); Frataxin(78-210) (d-FXN) (m78-FXN); Frataxin mature form (Frataxin(81-210)) (m81-FXN)]	HP:0000012	Urinary urgency	75
6310	P54253	ATX1	Ataxin-1 (Spinocerebellar ataxia type 1 protein)	HP:0000012	Urinary urgency	76
16	P49588	SYAC	Alanine--tRNA ligase, cytoplasmic (EC 6.1.1.7) (Alanyl-tRNA synthetase) (AlaRS) (Renal carcinoma antigen NY-REN-42)	HP:0000012	Urinary urgency	77
51024	Q9Y3D6	FIS1	Mitochondrial fission 1 protein (FIS1 homolog) (hFis1) (Tetratricopeptide repeat protein 11) (TPR repeat protein 11)	HP:0000012	Urinary urgency	78
65055	Q9H902	REEP1	Receptor expression-enhancing protein 1 (Spastic paraplegia 31 protein)	HP:0000012	Urinary urgency	79
6812	P61764	STXB1	Syntaxin-binding protein 1 (MUNC18-1) (N-Sec1) (Protein unc-18 homolog 1) (Unc18-1) (Protein unc-18 homolog A) (Unc-18A) (p67)	HP:0000012	Urinary urgency	80
9829	O75061	AUXI	Putative tyrosine-protein phosphatase auxilin (EC 3.1.3.48) (DnaJ homolog subfamily C member 6)	HP:0000012	Urinary urgency	81
80025	Q9BZ23	PANK2	Pantothenate kinase 2, mitochondrial (hPanK2) (EC 2.7.1.33) (Pantothenic acid kinase 2)	HP:0000012	Urinary urgency	82
1759	Q05193	DYN1	Dynamin-1 (EC 3.6.5.5)	HP:0000012	Urinary urgency	83
23111	Q8N0X7	SPART	Spartin (Spastic paraplegia 20 protein) (Trans-activated by hepatitis C virus core protein 1)	HP:0000012	Urinary urgency	84
84557	Q9H492	MLP3A	Microtubule-associated proteins 1A/1B light chain 3A (Autophagy-related protein LC3 A) (Autophagy-related ubiquitin-like modifier LC3 A) (MAP1 light chain 3-like protein 1) (MAP1A/MAP1B light chain 3 A) (MAP1A/MAP1B LC3 A) (Microtubule-associated protein 1 light chain 3 alpha)	HP:0000012	Urinary urgency	85
7405	Q9P2Y5	UVRAG	UV radiation resistance-associated gene protein (p63)	HP:0000012	Urinary urgency	86
23400	Q9NQ11	AT132	Polyamine-transporting ATPase 13A2 (EC 7.6.2.-)	HP:0000012	Urinary urgency	87
6253	O75298	RTN2	Reticulon-2 (Neuroendocrine-specific protein-like 1) (NSP-like protein 1) (Neuroendocrine-specific protein-like I) (NSP-like protein I) (NSPLI)	HP:0000012	Urinary urgency	88
9698	Q14671	PUM1	Pumilio homolog 1 (HsPUM) (Pumilio-1)	HP:0000012	Urinary urgency	89
11315	Q99497	PARK7	Parkinson disease protein 7 (Maillard deglycase) (Oncogene DJ1) (Parkinsonism-associated deglycase) (Protein DJ-1) (DJ-1) (Protein/nucleic acid deglycase DJ-1) (EC 3.1.2.-) (EC 3.5.1.-) (EC 3.5.1.124)	HP:0000012	Urinary urgency	90
1431	O75390	CISY	Citrate synthase, mitochondrial (EC 2.3.3.1) (Citrate (Si)-synthase)	HP:0000012	Urinary urgency	91
91056	Q2VPB7	AP5B1	AP-5 complex subunit beta-1 (Adaptor-related protein complex 5 beta subunit) (Beta5)	HP:0000012	Urinary urgency	92
55626	Q9C0C7	AMRA1	Activating molecule in BECN1-regulated autophagy protein 1	HP:0000012	Urinary urgency	93
3300	P25686	DNJB2	DnaJ homolog subfamily B member 2 (Heat shock 40 kDa protein 3) (Heat shock protein J1) (HSJ-1)	HP:0000012	Urinary urgency	94
9179	O00189	AP4M1	AP-4 complex subunit mu-1 (AP-4 adaptor complex mu subunit) (Adaptor-related protein complex 4 subunit mu-1) (Mu subunit of AP-4) (Mu-adaptin-related protein 2) (mu-ARP2) (Mu4-adaptin) (mu4)	HP:0000012	Urinary urgency	95
57704	Q9HCG7	GBA2	Non-lysosomal glucosylceramidase (NLGase) (EC 3.2.1.45) (Beta-glucocerebrosidase 2) (Beta-glucosidase 2) (Bile acid beta-glucosidase GBA2) (Bile acid glucosyl transferase GBA2) (Cholesterol glucosyltransferase GBA2) (EC 2.4.1.-) (Cholesteryl-beta-glucosidase GBA2) (EC 3.2.1.-) (Glucosylceramidase 2)	HP:0000012	Urinary urgency	96
1376	P23786	CPT2	Carnitine O-palmitoyltransferase 2, mitochondrial (EC 2.3.1.21) (Carnitine palmitoyltransferase II) (CPT II)	HP:0000012	Urinary urgency	97
23025	Q9UPW8	UN13A	Protein unc-13 homolog A (Munc13-1)	HP:0000012	Urinary urgency	98
3030	P40939	ECHA	Trifunctional enzyme subunit alpha, mitochondrial (78 kDa gastrin-binding protein) (Monolysocardiolipin acyltransferase) (EC 2.3.1.-) (TP-alpha) [Includes: Long-chain enoyl-CoA hydratase (EC 4.2.1.17); Long chain 3-hydroxyacyl-CoA dehydrogenase (EC 1.1.1.211)]	HP:0000012	Urinary urgency	99
81846	Q86WG5	MTMRD	Myotubularin-related protein 13 (Inactive phosphatidylinositol 3-phosphatase 13) (SET-binding factor 2)	HP:0000012	Urinary urgency	100
3303	P0DMV8	HS71A	Heat shock 70 kDa protein 1A (Heat shock 70 kDa protein 1) (HSP70-1) (HSP70.1)	HP:0000012	Urinary urgency	101
5832	P54886	P5CS	Delta-1-pyrroline-5-carboxylate synthase (P5CS) (Aldehyde dehydrogenase family 18 member A1) [Includes: Glutamate 5-kinase (GK) (EC 2.7.2.11) (Gamma-glutamyl kinase); Gamma-glutamyl phosphate reductase (GPR) (EC 1.2.1.41) (Glutamate-5-semialdehyde dehydrogenase) (Glutamyl-gamma-semialdehyde dehydrogenase)]	HP:0000012	Urinary urgency	102
6712	O15020	SPTN2	Spectrin beta chain, non-erythrocytic 2 (Beta-III spectrin) (Spinocerebellar ataxia 5 protein)	HP:0000012	Urinary urgency	103
471	P31939	PUR9	Bifunctional purine biosynthesis protein ATIC (AICAR transformylase/inosine monophosphate cyclohydrolase) (ATIC) [Cleaved into: Bifunctional purine biosynthesis protein ATIC, N-terminally processed] [Includes: Phosphoribosylaminoimidazolecarboxamide formyltransferase (EC 2.1.2.3) (5-aminoimidazole-4-carboxamide ribonucleotide formyltransferase) (AICAR formyltransferase) (AICAR transformylase); In…	HP:0000012	Urinary urgency	104
9909	O75064	DEN4B	DENN domain-containing protein 4B	HP:0000012	Urinary urgency	105
1213	Q00610	CLH1	Clathrin heavy chain 1 (Clathrin heavy chain on chromosome 17) (CLH-17)	HP:0000012	Urinary urgency	106
26289	Q9Y6K8	KAD5	Adenylate kinase isoenzyme 5 (AK 5) (EC 2.7.4.3) (EC 2.7.4.6) (ATP-AMP transphosphorylase 5)	HP:0000012	Urinary urgency	107
55737	Q96QK1	VPS35	Vacuolar protein sorting-associated protein 35 (hVPS35) (Maternal-embryonic 3) (Vesicle protein sorting 35)	HP:0000012	Urinary urgency	108
5160	P08559	ODPA	Pyruvate dehydrogenase E1 component subunit alpha, somatic form, mitochondrial (EC 1.2.4.1) (PDHE1-A type I)	HP:0000012	Urinary urgency	109
3337	P25685	DNJB1	DnaJ homolog subfamily B member 1 (DnaJ protein homolog 1) (Heat shock 40 kDa protein 1) (HSP40) (Heat shock protein 40) (Human DnaJ protein 1) (hDj-1)	HP:0000012	Urinary urgency	110
4359	P25189	MYP0	Myelin protein P0 (Myelin peripheral protein) (MPP) (Myelin protein zero)	HP:0000012	Urinary urgency	111
1737	P10515	ODP2	Dihydrolipoyllysine-residue acetyltransferase component of pyruvate dehydrogenase complex, mitochondrial (EC 2.3.1.12) (70 kDa mitochondrial autoantigen of primary biliary cirrhosis) (PBC) (Dihydrolipoamide acetyltransferase component of pyruvate dehydrogenase complex) (M2 antigen complex 70 kDa subunit) (Pyruvate dehydrogenase complex component E2) (PDC-E2) (PDCE2)	HP:0000012	Urinary urgency	112
5289	Q8NEB9	PK3C3	Phosphatidylinositol 3-kinase catalytic subunit type 3 (PI3-kinase type 3) (PI3K type 3) (PtdIns-3-kinase type 3) (EC 2.7.1.137) (Phosphatidylinositol 3-kinase p100 subunit) (Phosphoinositide-3-kinase class 3) (hVps34)	HP:0000012	Urinary urgency	113
1639	Q14203	DCTN1	Dynactin subunit 1 (150 kDa dynein-associated polypeptide) (DAP-150) (DP-150) (p135) (p150-glued)	HP:0000012	Urinary urgency	114
81631	Q9GZQ8	MLP3B	Microtubule-associated proteins 1A/1B light chain 3B (Autophagy-related protein LC3 B) (Autophagy-related ubiquitin-like modifier LC3 B) (MAP1 light chain 3-like protein 2) (MAP1A/MAP1B light chain 3 B) (MAP1A/MAP1B LC3 B) (Microtubule-associated protein 1 light chain 3 beta)	HP:0000012	Urinary urgency	115
7353	Q92890	UFD1	Ubiquitin recognition factor in ER-associated degradation protein 1 (Ubiquitin fusion degradation protein 1) (UB fusion protein 1)	HP:0000012	Urinary urgency	116
84343	Q969F9	HPS3	Hermansky-Pudlak syndrome 3 protein	HP:0000012	Urinary urgency	117
120892	Q5S007	LRRK2	Leucine-rich repeat serine/threonine-protein kinase 2 (EC 2.7.11.1) (EC 3.6.5.-) (Dardarin)	HP:0000012	Urinary urgency	118
5071	O60260	PRKN	E3 ubiquitin-protein ligase parkin (Parkin) (EC 2.3.2.31) (Parkin RBR E3 ubiquitin-protein ligase) (Parkinson juvenile disease protein 2) (Parkinson disease protein 2)	HP:0000012	Urinary urgency	119
3312	P11142	HSP7C	Heat shock cognate 71 kDa protein (EC 3.6.4.10) (Heat shock 70 kDa protein 8) (Lipopolysaccharide-associated protein 1) (LAP-1) (LPS-associated protein 1)	HP:0000012	Urinary urgency	120
9896	Q92562	FIG4	Polyphosphoinositide phosphatase (EC 3.1.3.-) (Phosphatidylinositol 3,5-bisphosphate 5-phosphatase) (SAC domain-containing protein 3)	HP:0000012	Urinary urgency	121
55066	Q8NCN5	PDPR	Pyruvate dehydrogenase phosphatase regulatory subunit, mitochondrial (PDPr)	HP:0000012	Urinary urgency	122
7251	Q99816	TS101	Tumor susceptibility gene 101 protein (ESCRT-I complex subunit TSG101)	HP:0000012	Urinary urgency	123
9776	O75143	ATG13	Autophagy-related protein 13	HP:0000012	Urinary urgency	124
91574	Q9H3J6	CL065	Probable peptide chain release factor C12orf65, mitochondrial	HP:0000012	Urinary urgency	125
3800	O60282	KIF5C	Kinesin heavy chain isoform 5C (Kinesin heavy chain neuron-specific 2)	HP:0000012	Urinary urgency	126
2572	Q05329	DCE2	Glutamate decarboxylase 2 (EC 4.1.1.15) (65 kDa glutamic acid decarboxylase) (GAD-65) (Glutamate decarboxylase 65 kDa isoform)	HP:0000012	Urinary urgency	127
2752	P15104	GLNA	Glutamine synthetase (GS) (EC 6.3.1.2) (Glutamate--ammonia ligase) (Palmitoyltransferase GLUL) (EC 2.3.1.225)	HP:0000012	Urinary urgency	128
4747	P07196	NFL	Neurofilament light polypeptide (NF-L) (68 kDa neurofilament protein) (Neurofilament triplet L protein)	HP:0000012	Urinary urgency	129
7175	P12270	TPR	Nucleoprotein TPR (Megator) (NPC-associated intranuclear protein) (Translocated promoter region protein)	HP:0000012	Urinary urgency	130
1610	P14920	OXDA	D-amino-acid oxidase (DAAO) (DAMOX) (DAO) (EC 1.4.3.3)	HP:0000012	Urinary urgency	131
34	P11310	ACADM	Medium-chain specific acyl-CoA dehydrogenase, mitochondrial (MCAD) (EC 1.3.8.7) (Medium chain acyl-CoA dehydrogenase) (MCADH)	HP:0000012	Urinary urgency	132
55102	Q96BY7	ATG2B	Autophagy-related protein 2 homolog B	HP:0000012	Urinary urgency	133
7416	P21796	VDAC1	Voltage-dependent anion-selective channel protein 1 (VDAC-1) (hVDAC1) (Outer mitochondrial membrane protein porin 1) (Plasmalemmal porin) (Porin 31HL) (Porin 31HM)	HP:0000012	Urinary urgency	134
79152	Q7L5A8	FA2H	Fatty acid 2-hydroxylase (EC 1.14.18.-) (Fatty acid alpha-hydroxylase) (Fatty acid hydroxylase domain-containing protein 1)	HP:0000012	Urinary urgency	135
47	P53396	ACLY	ATP-citrate synthase (EC 2.3.3.8) (ATP-citrate (pro-S-)-lyase) (ACL) (Citrate cleavage enzyme)	HP:0000012	Urinary urgency	136
1738	P09622	DLDH	Dihydrolipoyl dehydrogenase, mitochondrial (EC 1.8.1.4) (Dihydrolipoamide dehydrogenase) (Glycine cleavage system L protein)	HP:0000012	Urinary urgency	137
7942	P19484	TFEB	Transcription factor EB (Class E basic helix-loop-helix protein 35) (bHLHe35)	HP:0000012	Urinary urgency	138
164	O43747	AP1G1	AP-1 complex subunit gamma-1 (Adaptor protein complex AP-1 subunit gamma-1) (Adaptor-related protein complex 1 subunit gamma-1) (Clathrin assembly protein complex 1 gamma-1 large chain) (Gamma1-adaptin) (Golgi adaptor HA1/AP1 adaptin subunit gamma-1)	HP:0000012	Urinary urgency	139
123	Q99541	PLIN2	Perilipin-2 (Adipophilin) (Adipose differentiation-related protein) (ADRP)	HP:0000012	Urinary urgency	140
5091	P11498	PYC	Pyruvate carboxylase, mitochondrial (EC 6.4.1.1) (Pyruvic carboxylase) (PCB)	HP:0000012	Urinary urgency	141
25851	Q7Z6L1	TCPR1	Tectonin beta-propeller repeat-containing protein 1	HP:0000012	Urinary urgency	142
2081	O75460	ERN1	Serine/threonine-protein kinase/endoribonuclease IRE1 (Endoplasmic reticulum-to-nucleus signaling 1) (Inositol-requiring protein 1) (hIRE1p) (Ire1-alpha) (IRE1a) [Includes: Serine/threonine-protein kinase (EC 2.7.11.1); Endoribonuclease (EC 3.1.26.-)]	HP:0000012	Urinary urgency	143
2026	P09104	ENOG	Gamma-enolase (EC 4.2.1.11) (2-phospho-D-glycerate hydro-lyase) (Enolase 2) (Neural enolase) (Neuron-specific enolase) (NSE)	HP:0000012	Urinary urgency	144
3508	P38935	SMBP2	DNA-binding protein SMUBP-2 (EC 3.6.4.12) (EC 3.6.4.13) (ATP-dependent helicase IGHMBP2) (Glial factor 1) (GF-1) (Immunoglobulin mu-binding protein 2)	HP:0000012	Urinary urgency	145
2597	P04406	G3P	Glyceraldehyde-3-phosphate dehydrogenase (GAPDH) (EC 1.2.1.12) (Peptidyl-cysteine S-nitrosylase GAPDH) (EC 2.6.99.-)	HP:0000012	Urinary urgency	146
2936	P00390	GSHR	Glutathione reductase, mitochondrial (GR) (GRase) (EC 1.8.1.7)	HP:0000012	Urinary urgency	147
10989	Q16891	MIC60	MICOS complex subunit MIC60 (Cell proliferation-inducing gene 4/52 protein) (Mitochondrial inner membrane protein) (Mitofilin) (p87/89)	HP:0000012	Urinary urgency	148
4905	P46459	NSF	Vesicle-fusing ATPase (EC 3.6.4.6) (N-ethylmaleimide-sensitive fusion protein) (NEM-sensitive fusion protein) (Vesicular-fusion protein NSF)	HP:0000012	Urinary urgency	149
54995	Q9NWU1	OXSM	3-oxoacyl-[acyl-carrier-protein] synthase, mitochondrial (EC 2.3.1.41) (Beta-ketoacyl-ACP synthase)	HP:0000012	Urinary urgency	150
190	P51843	NR0B1	Nuclear receptor subfamily 0 group B member 1 (DSS-AHC critical region on the X chromosome protein 1) (Nuclear receptor DAX-1)	HP:0000013	Hypoplasia of the uterus	1
3730	P23352	KALM	Anosmin-1 (Adhesion molecule-like X-linked) (Kallmann syndrome protein)	HP:0000013	Hypoplasia of the uterus	2
2797	O43555	GON2	Progonadoliberin-2 (Progonadoliberin II) [Cleaved into: Gonadoliberin-2 (Gonadoliberin II) (Gonadotropin-releasing hormone II) (GnRH II) (Luliberin II) (Luteinizing hormone-releasing hormone II) (LH-RH II); GnRH-associated peptide 2 (GnRH-associated peptide II)]	HP:0000013	Hypoplasia of the uterus	3
128674	Q8NFJ6	PKR2	Prokineticin receptor 2 (PK-R2) (G-protein coupled receptor 73-like 1) (G-protein coupled receptor I5E) (GPR73b) (GPRg2)	HP:0000013	Hypoplasia of the uterus	4
2661	O60383	GDF9	Growth/differentiation factor 9 (GDF-9)	HP:0000013	Hypoplasia of the uterus	5
2798	P30968	GNRHR	Gonadotropin-releasing hormone receptor (GnRH receptor) (GnRH-R)	HP:0000013	Hypoplasia of the uterus	6
1761	Q9Y5R6	DMRT1	Doublesex- and mab-3-related transcription factor 1 (DM domain expressed in testis protein 1)	HP:0000013	Hypoplasia of the uterus	7
3284	P26439	3BHS2	3 beta-hydroxysteroid dehydrogenase/Delta 5-->4-isomerase type 2 (3 beta-hydroxysteroid dehydrogenase/Delta 5-->4-isomerase type II) (3-beta-HSD II) (3-beta-HSD adrenal and gonadal type) [Includes: 3-beta-hydroxy-Delta(5)-steroid dehydrogenase (EC 1.1.1.145) (3-beta-hydroxy-5-ene steroid dehydrogenase) (Progesterone reductase); Steroid Delta-isomerase (EC 5.3.3.1) (Delta-5-3-ketosteroid isomerase…	HP:0000013	Hypoplasia of the uterus	8
268	P03971	MIS	Muellerian-inhibiting factor (Anti-Muellerian hormone) (AMH) (Muellerian-inhibiting substance) (MIS)	HP:0000013	Hypoplasia of the uterus	9
1588	P11511	CP19A	Aromatase (EC 1.14.14.14) (CYPXIX) (Cytochrome P-450AROM) (Cytochrome P450 19A1) (Estrogen synthase)	HP:0000013	Hypoplasia of the uterus	10
2796	P01148	GON1	Progonadoliberin-1 (Progonadoliberin I) [Cleaved into: Gonadoliberin-1 (Gonadoliberin I) (Gonadorelin) (Gonadotropin-releasing hormone I) (GnRH-I) (Luliberin I) (Luteinizing hormone-releasing hormone I) (LH-RH I); GnRH-associated peptide 1 (GnRH-associated peptide I)]	HP:0000013	Hypoplasia of the uterus	11
3283	P14060	3BHS1	3 beta-hydroxysteroid dehydrogenase/Delta 5-->4-isomerase type 1 (3 beta-hydroxysteroid dehydrogenase/Delta 5-->4-isomerase type I) (3-beta-HSD I) (3-beta-hydroxy-5-ene steroid dehydrogenase) (3-beta-hydroxy-Delta(5)-steroid dehydrogenase) (EC 1.1.1.145) (3-beta-hydroxysteroid 3-dehydrogenase) (EC 1.1.1.270) (Delta-5-3-ketosteroid isomerase) (Dihydrotestosterone oxidoreductase) (EC 1.1.1.210) (St…	HP:0000013	Hypoplasia of the uterus	12
1592	O43174	CP26A	Cytochrome P450 26A1 (EC 1.14.13.-) (Cytochrome P450 retinoic acid-inactivating 1) (Cytochrome P450RAI) (hP450RAI) (Retinoic acid 4-hydroxylase) (Retinoic acid-metabolizing cytochrome)	HP:0000013	Hypoplasia of the uterus	13
3973	P22888	LSHR	Lutropin-choriogonadotropic hormone receptor (LH/CG-R) (Luteinizing hormone receptor) (LHR) (LSH-R)	HP:0000013	Hypoplasia of the uterus	14
60675	Q9HC23	PROK2	Prokineticin-2 (PK2) (Protein Bv8 homolog)	HP:0000013	Hypoplasia of the uterus	15
1583	P05108	CP11A	Cholesterol side-chain cleavage enzyme, mitochondrial (EC 1.14.15.6) (CYPXIA1) (Cholesterol desmolase) (Cytochrome P450 11A1) (Cytochrome P450(scc))	HP:0000013	Hypoplasia of the uterus	16
1545	Q16678	CP1B1	Cytochrome P450 1B1 (EC 1.14.14.1) (CYPIB1) (Hydroperoxy icosatetraenoate dehydratase) (EC 4.2.1.152)	HP:0000013	Hypoplasia of the uterus	17
3814	Q15726	KISS1	Metastasis-suppressor KiSS-1 (Kisspeptin-1) [Cleaved into: Metastin (Kisspeptin-54); Kisspeptin-14; Kisspeptin-13; Kisspeptin-10]	HP:0000013	Hypoplasia of the uterus	18
6715	P18405	S5A1	3-oxo-5-alpha-steroid 4-dehydrogenase 1 (EC 1.3.1.22) (SR type 1) (Steroid 5-alpha-reductase 1) (S5AR 1)	HP:0000013	Hypoplasia of the uterus	19
2488	P01225	FSHB	Follitropin subunit beta (Follicle-stimulating hormone beta subunit) (FSH-B) (FSH-beta) (Follitropin beta chain)	HP:0000013	Hypoplasia of the uterus	20
84634	Q969F8	KISSR	KiSS-1 receptor (KiSS-1R) (G-protein coupled receptor 54) (G-protein coupled receptor OT7T175) (hOT7T175) (Hypogonadotropin-1) (Kisspeptins receptor) (Metastin receptor)	HP:0000013	Hypoplasia of the uterus	21
668	P58012	FOXL2	Forkhead box protein L2	HP:0000013	Hypoplasia of the uterus	22
122042	Q8WXD0	RXFP2	Relaxin receptor 2 (G-protein coupled receptor 106) (G-protein coupled receptor affecting testicular descent) (Leucine-rich repeat-containing G-protein coupled receptor 8) (Relaxin family peptide receptor 2)	HP:0000013	Hypoplasia of the uterus	23
346673	Q7Z7C7	STRA8	Stimulated by retinoic acid gene 8 protein homolog	HP:0000013	Hypoplasia of the uterus	24
3293	P37058	DHB3	Testosterone 17-beta-dehydrogenase 3 (EC 1.1.1.64) (17-beta-hydroxysteroid dehydrogenase type 3) (17-beta-HSD 3) (Estradiol 17-beta-dehydrogenase 2) (EC 1.1.1.62) (Short chain dehydrogenase/reductase family 12C member 2) (Testicular 17-beta-hydroxysteroid dehydrogenase)	HP:0000013	Hypoplasia of the uterus	25
2516	Q13285	STF1	Steroidogenic factor 1 (SF-1) (STF-1) (hSF-1) (Adrenal 4-binding protein) (Fushi tarazu factor homolog 1) (Nuclear receptor subfamily 5 group A member 1) (Steroid hormone receptor Ad4BP)	HP:0000013	Hypoplasia of the uterus	26
378925	Q8N7C7	RN148	RING finger protein 148	HP:0000013	Hypoplasia of the uterus	27
56603	Q9NR63	CP26B	Cytochrome P450 26B1 (EC 1.14.13.-) (Cytochrome P450 26A2) (Cytochrome P450 retinoic acid-inactivating 2) (Cytochrome P450RAI-2) (Retinoic acid-metabolizing cytochrome)	HP:0000013	Hypoplasia of the uterus	28
386724	Q86WK7	AMGO3	Amphoterin-induced protein 3 (AMIGO-3) (Alivin-3)	HP:0000013	Hypoplasia of the uterus	29
9573	Q9NR23	GDF3	Growth/differentiation factor 3 (GDF-3)	HP:0000013	Hypoplasia of the uterus	30
6469	Q15465	SHH	Sonic hedgehog protein (SHH) (HHG-1) (Shh unprocessed N-terminal signaling and C-terminal autoprocessing domains) (ShhNC) [Cleaved into: Sonic hedgehog protein N-product (ShhN) (Shh N-terminal processed signaling domains) (ShhNp)]	HP:0000013	Hypoplasia of the uterus	31
50846	O43323	DHH	Desert hedgehog protein (DHH) (HHG-3) [Cleaved into: Desert hedgehog protein N-product; Desert hedgehog protein C-product]	HP:0000013	Hypoplasia of the uterus	32
6727	P37108	SRP14	Signal recognition particle 14 kDa protein (SRP14) (18 kDa Alu RNA-binding protein)	HP:0000013	Hypoplasia of the uterus	33
10886	Q9Y5X5	NPFF2	Neuropeptide FF receptor 2 (G-protein coupled receptor 74) (G-protein coupled receptor HLWAR77) (Neuropeptide G-protein coupled receptor)	HP:0000013	Hypoplasia of the uterus	34
1910	P24530	EDNRB	Endothelin receptor type B (ET-B) (ET-BR) (Endothelin receptor non-selective type)	HP:0000013	Hypoplasia of the uterus	35
6866	Q9UHF0	TKNK	Tachykinin-3 (ZNEUROK1) [Cleaved into: Neurokinin-B (NKB) (Neuromedin-K)]	HP:0000013	Hypoplasia of the uterus	36
6728	P09132	SRP19	Signal recognition particle 19 kDa protein (SRP19)	HP:0000013	Hypoplasia of the uterus	37
6716	P31213	S5A2	3-oxo-5-alpha-steroid 4-dehydrogenase 2 (EC 1.3.1.22) (5 alpha-SR2) (SR type 2) (Steroid 5-alpha-reductase 2) (S5AR 2) (Type II 5-alpha reductase)	HP:0000013	Hypoplasia of the uterus	38
8820	Q9UBX0	HESX1	Homeobox expressed in ES cells 1 (Homeobox protein ANF) (hAnf)	HP:0000013	Hypoplasia of the uterus	39
3640	P51460	INSL3	Insulin-like 3 (Leydig insulin-like peptide) (Ley-I-L) (Relaxin-like factor) [Cleaved into: Insulin-like 3 B chain; Insulin-like 3 A chain]	HP:0000013	Hypoplasia of the uterus	40
245927	Q30KQ7	DB113	Beta-defensin 113 (Beta-defensin 13) (DEFB-13) (Defensin, beta 113)	HP:0000013	Hypoplasia of the uterus	41
80712	Q8N693	ESX1	Homeobox protein ESX1 (Extraembryonic, spermatogenesis, homeobox 1) [Cleaved into: Homeobox protein ESX1-N; Homeobox protein ESX1-C]	HP:0000013	Hypoplasia of the uterus	42
2260	P11362	FGFR1	Fibroblast growth factor receptor 1 (FGFR-1) (EC 2.7.10.1) (Basic fibroblast growth factor receptor 1) (BFGFR) (bFGF-R-1) (Fms-like tyrosine kinase 2) (FLT-2) (N-sam) (Proto-oncogene c-Fgr) (CD antigen CD331)	HP:0000013	Hypoplasia of the uterus	43
387129	Q6W5P4	NPSR1	Neuropeptide S receptor (G-protein coupled receptor 154) (G-protein coupled receptor PGR14) (G-protein coupled receptor for asthma susceptibility)	HP:0000013	Hypoplasia of the uterus	44
2253	P55075	FGF8	Fibroblast growth factor 8 (FGF-8) (Androgen-induced growth factor) (AIGF) (Heparin-binding growth factor 8) (HBGF-8)	HP:0000013	Hypoplasia of the uterus	45
59350	Q9HBX9	RXFP1	Relaxin receptor 1 (Leucine-rich repeat-containing G-protein coupled receptor 7) (Relaxin family peptide receptor 1)	HP:0000013	Hypoplasia of the uterus	46
1586	P05093	CP17A	Steroid 17-alpha-hydroxylase/17,20 lyase (EC 1.14.14.19) (17-alpha-hydroxyprogesterone aldolase) (EC 1.14.14.32) (CYPXVII) (Cytochrome P450 17A1) (Cytochrome P450-C17) (Cytochrome P450c17) (Steroid 17-alpha-monooxygenase)	HP:0000013	Hypoplasia of the uterus	47
2263	P21802	FGFR2	Fibroblast growth factor receptor 2 (FGFR-2) (EC 2.7.10.1) (K-sam) (KGFR) (Keratinocyte growth factor receptor) (CD antigen CD332)	HP:0000013	Hypoplasia of the uterus	48
1109	P17516	AK1C4	Aldo-keto reductase family 1 member C4 (EC 1.1.1.-) (EC 1.1.1.209) (EC 1.1.1.210) (EC 1.1.1.51) (EC 1.1.1.53) (EC 1.1.1.62) (3-alpha-hydroxysteroid dehydrogenase type I) (3-alpha-HSD1) (EC 1.1.1.357) (3alpha-hydroxysteroid 3-dehydrogenase) (Chlordecone reductase) (CDR) (EC 1.1.1.225) (Dihydrodiol dehydrogenase 4) (DD-4) (DD4) (HAKRA)	HP:0000013	Hypoplasia of the uterus	49
27006	Q9HCT0	FGF22	Fibroblast growth factor 22 (FGF-22)	HP:0000013	Hypoplasia of the uterus	50
245936	Q8N688	DB123	Beta-defensin 123 (Beta-defensin 23) (DEFB-23) (Defensin, beta 123)	HP:0000013	Hypoplasia of the uterus	51
83741	Q7Z6R9	AP2D	Transcription factor AP-2-delta (AP2-delta) (Activating enhancer-binding protein 2-delta) (Transcription factor AP-2-beta-like 1)	HP:0000013	Hypoplasia of the uterus	52
245913	Q30KQ9	DB110	Beta-defensin 110 (Beta-defensin 10) (DEFB-10) (Beta-defensin 11) (DEFB-11) (Beta-defensin 111) (Defensin, beta 110) (Defensin, beta 111)	HP:0000013	Hypoplasia of the uterus	53
59352	Q9HBX8	LGR6	Leucine-rich repeat-containing G-protein coupled receptor 6	HP:0000013	Hypoplasia of the uterus	54
6726	P49458	SRP09	Signal recognition particle 9 kDa protein (SRP9)	HP:0000013	Hypoplasia of the uterus	55
8854	O94788	AL1A2	Retinal dehydrogenase 2 (RALDH 2) (RalDH2) (EC 1.2.1.36) (Aldehyde dehydrogenase family 1 member A2) (Retinaldehyde-specific dehydrogenase type 2) (RALDH(II))	HP:0000013	Hypoplasia of the uterus	56
5626	O75360	PROP1	Homeobox protein prophet of Pit-1 (PROP-1) (Pituitary-specific homeodomain factor)	HP:0000013	Hypoplasia of the uterus	57
2492	P23945	FSHR	Follicle-stimulating hormone receptor (FSH-R) (Follitropin receptor)	HP:0000013	Hypoplasia of the uterus	58
255061	Q86UU9	TKN4	Tachykinin-4 (Preprotachykinin-C) (PPT-C) [Cleaved into: Endokinin-A (EKA); Endokinin-A/B (EKA/B); Endokinin-C (EKC)]	HP:0000013	Hypoplasia of the uterus	59
2249	P08620	FGF4	Fibroblast growth factor 4 (FGF-4) (Heparin secretory-transforming protein 1) (HST) (HST-1) (HSTF-1) (Heparin-binding growth factor 4) (HBGF-4) (Transforming protein KS3)	HP:0000013	Hypoplasia of the uterus	60
284654	Q2MKA7	RSPO1	R-spondin-1 (Roof plate-specific spondin-1) (hRspo1)	HP:0000013	Hypoplasia of the uterus	61
1908	P14138	EDN3	Endothelin-3 (ET-3) (Preproendothelin-3) (PPET3)	HP:0000013	Hypoplasia of the uterus	62
54579	P35504	UD15	UDP-glucuronosyltransferase 1A5 (UGT1A5) (EC 2.4.1.17) (UDP-glucuronosyltransferase 1-5) (UDPGT 1-5) (UGT1*5) (UGT1-05) (UGT1.5) (UDP-glucuronosyltransferase 1-E) (UGT-1E) (UGT1E)	HP:0000013	Hypoplasia of the uterus	63
81848	Q9C004	SPY4	Protein sprouty homolog 4 (Spry-4)	HP:0000013	Hypoplasia of the uterus	64
135935	O60393	NOBOX	Homeobox protein NOBOX	HP:0000013	Hypoplasia of the uterus	65
2735	P08151	GLI1	Zinc finger protein GLI1 (Glioma-associated oncogene) (Oncogene GLI)	HP:0000013	Hypoplasia of the uterus	66
8608	O75452	RDH16	Retinol dehydrogenase 16 (EC 1.1.1.105) (EC 1.1.1.209) (EC 1.1.1.315) (EC 1.1.1.53) (Human epidermal retinol dehydrogenase) (hRDH-E) (Microsomal NAD(+)-dependent retinol dehydrogenase 4) (RoDH-4) (Short chain dehydrogenase/reductase family 9C member 8) (Sterol/retinol dehydrogenase)	HP:0000013	Hypoplasia of the uterus	67
6730	Q9UHB9	SRP68	Signal recognition particle subunit SRP68 (SRP68) (Signal recognition particle 68 kDa protein)	HP:0000013	Hypoplasia of the uterus	68
7783	Q05996	ZP2	Zona pellucida sperm-binding protein 2 (Zona pellucida glycoprotein 2) (Zp-2) (Zona pellucida protein A) [Cleaved into: Processed zona pellucida sperm-binding protein 2]	HP:0000013	Hypoplasia of the uterus	69
27287	O95231	VENTX	Homeobox protein VENTX (VENT homeobox homolog) (VENT-like homeobox protein 2)	HP:0000013	Hypoplasia of the uterus	70
8822	O60258	FGF17	Fibroblast growth factor 17 (FGF-17)	HP:0000013	Hypoplasia of the uterus	71
54575	Q9HAW8	UD110	UDP-glucuronosyltransferase 1A10 (UGT1A10) (EC 2.4.1.17) (UDP-glucuronosyltransferase 1-10) (UDPGT 1-10) (UGT1*10) (UGT1-10) (UGT1.10) (UDP-glucuronosyltransferase 1-J) (UGT-1J) (UGT1J)	HP:0000013	Hypoplasia of the uterus	72
91	P36896	ACV1B	Activin receptor type-1B (EC 2.7.11.30) (Activin receptor type IB) (ACTR-IB) (Activin receptor-like kinase 4) (ALK-4) (Serine/threonine-protein kinase receptor R2) (SKR2)	HP:0000013	Hypoplasia of the uterus	73
2255	O15520	FGF10	Fibroblast growth factor 10 (FGF-10) (Keratinocyte growth factor 2)	HP:0000013	Hypoplasia of the uterus	74
6997	P13385	TDGF1	Teratocarcinoma-derived growth factor 1 (Cripto-1 growth factor) (CRGF) (Epidermal growth factor-like cripto protein CR1)	HP:0000013	Hypoplasia of the uterus	75
401934	E7ERA6	RN223	RING finger protein 223	HP:0000013	Hypoplasia of the uterus	76
66002	Q9HCS2	CP4FC	Cytochrome P450 4F12 (EC 1.14.14.1) (CYPIVF12)	HP:0000013	Hypoplasia of the uterus	77
8630	O14756	H17B6	17-beta-hydroxysteroid dehydrogenase type 6 (17-beta-HSD 6) (17-beta-HSD6) (EC 1.1.1.105) (EC 1.1.1.209) (EC 1.1.1.239) (EC 1.1.1.53) (EC 1.1.1.62) (3-alpha->beta-hydroxysteroid epimerase) (3-alpha->beta-HSE) (Oxidative 3-alpha hydroxysteroid dehydrogenase) (Short chain dehydrogenase/reductase family 9C member 6)	HP:0000013	Hypoplasia of the uterus	78
58524	Q9NQL9	DMRT3	Doublesex- and mab-3-related transcription factor 3	HP:0000013	Hypoplasia of the uterus	79
55366	Q9BXB1	LGR4	Leucine-rich repeat-containing G-protein coupled receptor 4 (G-protein coupled receptor 48)	HP:0000013	Hypoplasia of the uterus	80
84870	Q9BXY4	RSPO3	R-spondin-3 (Protein with TSP type-1 repeat) (hPWTSR) (Roof plate-specific spondin-3) (hRspo3) (Thrombospondin type-1 domain-containing protein 2)	HP:0000013	Hypoplasia of the uterus	81
2520	P01350	GAST	Gastrin [Cleaved into: Gastrin-71 (Gastrin component I); Gastrin-52 (G52); Big gastrin (Gastrin component II) (Gastrin-34) (G34); Gastrin (Gastrin component III) (Gastrin-17) (G17); Gastrin-14 (G14); Gastrin-6 (G6)]	HP:0000013	Hypoplasia of the uterus	82
2674	P56159	GFRA1	GDNF family receptor alpha-1 (GDNF receptor alpha-1) (GDNFR-alpha-1) (GFR-alpha-1) (RET ligand 1) (TGF-beta-related neurotrophic factor receptor 1)	HP:0000013	Hypoplasia of the uterus	83
10720	O75310	UDB11	UDP-glucuronosyltransferase 2B11 (UDPGT 2B11) (EC 2.4.1.17)	HP:0000013	Hypoplasia of the uterus	84
10170	Q9BPW9	DHRS9	Dehydrogenase/reductase SDR family member 9 (EC 1.1.1.209) (EC 1.1.1.53) (3-alpha hydroxysteroid dehydrogenase) (3-alpha-HSD) (NADP-dependent retinol dehydrogenase/reductase) (RDH-E2) (RDHL) (Retinol dehydrogenase 15) (EC 1.1.1.105) (Short chain dehydrogenase/reductase family 9C member 4) (Short-chain dehydrogenase/reductase retSDR8) (Tracheobronchial epithelial cell-specific retinol dehydrogenas…	HP:0000013	Hypoplasia of the uterus	85
81623	Q9BYW3	DB126	Beta-defensin 126 (Beta-defensin 26) (DEFB-26) (Defensin, beta 126) (Epididymal secretory protein 13.2) (ESP13.2) (HBD26)	HP:0000013	Hypoplasia of the uterus	86
3292	P14061	DHB1	17-beta-hydroxysteroid dehydrogenase type 1 (17-beta-HSD 1) (EC 1.1.1.51) (20 alpha-hydroxysteroid dehydrogenase) (20-alpha-HSD) (E2DH) (Estradiol 17-beta-dehydrogenase 1) (EC 1.1.1.62) (Placental 17-beta-hydroxysteroid dehydrogenase) (Short chain dehydrogenase/reductase family 28C member 1)	HP:0000013	Hypoplasia of the uterus	87
8756	Q9H2U9	ADAM7	Disintegrin and metalloproteinase domain-containing protein 7 (ADAM 7) (Sperm maturation-related glycoprotein GP-83)	HP:0000013	Hypoplasia of the uterus	88
54659	P35503	UD13	UDP-glucuronosyltransferase 1A3 (UGT1A3) (EC 2.4.1.17) (UDP-glucuronosyltransferase 1-3) (UDPGT 1-3) (UGT1*3) (UGT1-03) (UGT1.3) (UDP-glucuronosyltransferase 1-C) (UGT-1C) (UGT1C) (UDP-glucuronosyltransferase 1A isoform 3)	HP:0000013	Hypoplasia of the uterus	89
64220	Q9BX79	STRA6	Receptor for retinol uptake STRA6 (Retinol-binding protein receptor STRA6) (Stimulated by retinoic acid gene 6 protein homolog)	HP:0000013	Hypoplasia of the uterus	90
400830	Q7Z7B7	DB132	Beta-defensin 132 (Beta-defensin 32) (BD-32) (DEFB-32) (Defensin HEL-75) (Defensin, beta 132)	HP:0000013	Hypoplasia of the uterus	91
26012	Q6X4W1	NSMF	NMDA receptor synaptonuclear signaling and neuronal migration factor (Nasal embryonic luteinizing hormone-releasing hormone factor) (Nasal embryonic LHRH factor)	HP:0000013	Hypoplasia of the uterus	92
6013	P04808	REL1	Prorelaxin H1 [Cleaved into: Relaxin B chain; Relaxin A chain]	HP:0000013	Hypoplasia of the uterus	93
6870	P29371	NK3R	Neuromedin-K receptor (NKR) (NK-3 receptor) (NK-3R) (Neurokinin B receptor) (Tachykinin receptor 3)	HP:0000013	Hypoplasia of the uterus	94
4838	Q96S42	NODAL	Nodal homolog	HP:0000013	Hypoplasia of the uterus	95
3641	Q14641	INSL4	Early placenta insulin-like peptide (EPIL) (Insulin-like peptide 4) (Placentin) [Cleaved into: Early placenta insulin-like peptide B chain; Early placenta insulin-like peptide A chain]	HP:0000013	Hypoplasia of the uterus	96
54657	P22310	UD14	UDP-glucuronosyltransferase 1A4 (UGT1A4) (EC 2.4.1.17) (Bilirubin-specific UDPGT isozyme 2) (hUG-BR2) (UDP-glucuronosyltransferase 1-4) (UDPGT 1-4) (UGT1*4) (UGT1-04) (UGT1.4) (UDP-glucuronosyltransferase 1-D) (UGT-1D) (UGT1D)	HP:0000013	Hypoplasia of the uterus	97
199974	Q86W10	CP4Z1	Cytochrome P450 4Z1 (EC 1.14.14.1) (CYPIVZ1)	HP:0000013	Hypoplasia of the uterus	98
269	Q16671	AMHR2	Anti-Muellerian hormone type-2 receptor (EC 2.7.11.30) (Anti-Muellerian hormone type II receptor) (AMH type II receptor) (MIS type II receptor) (MISRII) (MRII)	HP:0000013	Hypoplasia of the uterus	99
8644	P42330	AK1C3	Aldo-keto reductase family 1 member C3 (EC 1.1.1.-) (EC 1.1.1.210) (EC 1.1.1.53) (EC 1.1.1.62) (17-beta-hydroxysteroid dehydrogenase type 5) (17-beta-HSD 5) (3-alpha-HSD type II, brain) (3-alpha-hydroxysteroid dehydrogenase type 2) (3-alpha-HSD type 2) (EC 1.1.1.357) (Chlordecone reductase homolog HAKRb) (Dihydrodiol dehydrogenase 3) (DD-3) (DD3) (Dihydrodiol dehydrogenase type I) (HA1753) (Prost…	HP:0000013	Hypoplasia of the uterus	100
613209	Q30KP9	DB135	Beta-defensin 135 (Defensin, beta 135)	HP:0000013	Hypoplasia of the uterus	101
2254	P31371	FGF9	Fibroblast growth factor 9 (FGF-9) (Glia-activating factor) (GAF) (Heparin-binding growth factor 9) (HBGF-9)	HP:0000013	Hypoplasia of the uterus	102
6770	P49675	STAR	Steroidogenic acute regulatory protein, mitochondrial (StAR) (START domain-containing protein 1) (StARD1)	HP:0000013	Hypoplasia of the uterus	103
64111	Q9HCQ7	NPVF	Pro-FMRFamide-related neuropeptide VF [Cleaved into: Neuropeptide NPSF; Neuropeptide RFRP-1; Neuropeptide RFRP-2; Neuropeptide NPVF (Neuropeptide RFRP-3)]	HP:0000013	Hypoplasia of the uterus	104
56891	Q8TCE9	PPL13	Placental protein 13-like (Charcot-Leyden crystal protein 2) (CLC2) (Galectin-14) (Gal-14)	HP:0000013	Hypoplasia of the uterus	105
54577	Q9HAW7	UD17	UDP-glucuronosyltransferase 1A7 (UGT1A7) (EC 2.4.1.17) (UDP-glucuronosyltransferase 1-7) (UDPGT 1-7) (UGT1*7) (UGT1-07) (UGT1.7) (UDP-glucuronosyltransferase 1-G) (UGT-1G) (UGT1G)	HP:0000013	Hypoplasia of the uterus	106
5731	P34995	PE2R1	Prostaglandin E2 receptor EP1 subtype (PGE receptor EP1 subtype) (PGE2 receptor EP1 subtype) (Prostanoid EP1 receptor)	HP:0000013	Hypoplasia of the uterus	107
1543	P04798	CP1A1	Cytochrome P450 1A1 (CYPIA1) (EC 1.14.14.1) (Cytochrome P450 form 6) (Cytochrome P450-C) (Cytochrome P450-P1) (Hydroperoxy icosatetraenoate dehydratase) (EC 4.2.1.152)	HP:0000013	Hypoplasia of the uterus	108
644414	P59861	D131A	Beta-defensin 131A (Beta-defensin 31) (DEFB-31) (Defensin, beta 131)	HP:0000013	Hypoplasia of the uterus	109
4286	O75030	MITF	Microphthalmia-associated transcription factor (Class E basic helix-loop-helix protein 32) (bHLHe32)	HP:0000013	Hypoplasia of the uterus	110
5979	P07949	RET	Proto-oncogene tyrosine-protein kinase receptor Ret (EC 2.7.10.1) (Cadherin family member 12) (Proto-oncogene c-Ret) [Cleaved into: Soluble RET kinase fragment; Extracellular cell-membrane anchored RET cadherin 120 kDa fragment]	HP:0000013	Hypoplasia of the uterus	111
1645	Q04828	AK1C1	Aldo-keto reductase family 1 member C1 (EC 1.1.1.-) (EC 1.1.1.112) (EC 1.1.1.209) (EC 1.1.1.210) (EC 1.1.1.357) (EC 1.1.1.51) (EC 1.1.1.53) (EC 1.1.1.62) (EC 1.3.1.20) (20-alpha-hydroxysteroid dehydrogenase) (20-alpha-HSD) (EC 1.1.1.149) (Chlordecone reductase homolog HAKRC) (Dihydrodiol dehydrogenase 1) (DD1) (High-affinity hepatic bile acid-binding protein) (HBAB)	HP:0000013	Hypoplasia of the uterus	112
347148	P83859	OX26	Orexigenic neuropeptide QRFP (P518) [Cleaved into: QRF-amide (Neuropeptide RF-amide) (Pyroglutamylated arginine-phenylalanine-amide peptide)]	HP:0000013	Hypoplasia of the uterus	113
5449	P28069	PIT1	Pituitary-specific positive transcription factor 1 (PIT-1) (Growth hormone factor 1) (GHF-1)	HP:0000013	Hypoplasia of the uterus	114
54490	Q9BY64	UDB28	UDP-glucuronosyltransferase 2B28 (UDPGT 2B28) (UGT2B28) (EC 2.4.1.17)	HP:0000013	Hypoplasia of the uterus	115
57834	Q9HBI6	CP4FB	Cytochrome P450 4F11 (CYPIVF11) (EC 1.14.14.1) (3-hydroxy fatty acids omega-hydroxylase CYP4F11) (Docosahexaenoic acid omega-hydroxylase) (EC 1.14.14.79) (Long-chain fatty acid omega-monooxygenase) (EC 1.14.14.80) (Phylloquinone omega-hydroxylase CYP4F11) (EC 1.14.14.78)	HP:0000013	Hypoplasia of the uterus	116
553	P47901	V1BR	Vasopressin V1b receptor (V1bR) (AVPR V1b) (AVPR V3) (Antidiuretic hormone receptor 1b) (Vasopressin V3 receptor)	HP:0000013	Hypoplasia of the uterus	117
6473	O15266	SHOX	Short stature homeobox protein (Pseudoautosomal homeobox-containing osteogenic protein) (Short stature homeobox-containing protein)	HP:0000013	Hypoplasia of the uterus	118
5737	P43088	PF2R	Prostaglandin F2-alpha receptor (PGF receptor) (PGF2-alpha receptor) (Prostanoid FP receptor)	HP:0000013	Hypoplasia of the uterus	119
245937	Q8NES8	DB124	Beta-defensin 124 (Beta-defensin 24) (DEFB-24) (Defensin, beta 124)	HP:0000013	Hypoplasia of the uterus	120
257407	A6NCS6	CB072	Uncharacterized protein C2orf72	HP:0000013	Hypoplasia of the uterus	121
613211	Q4QY38	DB134	Beta-defensin 134 (Defensin, beta 134)	HP:0000013	Hypoplasia of the uterus	122
257313	Q765I0	UTS2B	Urotensin-2B (Urotensin II-related peptide) (Urotensin IIB) (U-IIB) (UIIB) (Urotensin-2 domain-containing protein)	HP:0000013	Hypoplasia of the uterus	123
10252	O43609	SPY1	Protein sprouty homolog 1 (Spry-1)	HP:0000013	Hypoplasia of the uterus	124
81552	Q96AW1	VOPP1	Vesicular, overexpressed in cancer, prosurvival protein 1 (EGFR-coamplified and overexpressed protein) (ECop) (Glioblastoma-amplified secreted protein) (Putative NF-kappa-B-activating protein 055N)	HP:0000013	Hypoplasia of the uterus	125
2250	P12034	FGF5	Fibroblast growth factor 5 (FGF-5) (Heparin-binding growth factor 5) (HBGF-5) (Smag-82)	HP:0000013	Hypoplasia of the uterus	126
8549	O75473	LGR5	Leucine-rich repeat-containing G-protein coupled receptor 5 (G-protein coupled receptor 49) (G-protein coupled receptor 67) (G-protein coupled receptor HG38)	HP:0000013	Hypoplasia of the uterus	127
3547	Q8N6C5	IGSF1	Immunoglobulin superfamily member 1 (IgSF1) (Immunoglobulin-like domain-containing protein 1) (Inhibin-binding protein) (InhBP) (Pituitary gland-specific factor 2) (p120)	HP:0000013	Hypoplasia of the uterus	128
613210	Q30KP8	DB136	Beta-defensin 136 (Defensin, beta 136)	HP:0000013	Hypoplasia of the uterus	129
2261	P22607	FGFR3	Fibroblast growth factor receptor 3 (FGFR-3) (EC 2.7.10.1) (CD antigen CD333)	HP:0000013	Hypoplasia of the uterus	130
5727	Q13635	PTC1	Protein patched homolog 1 (PTC) (PTC1)	HP:0000013	Hypoplasia of the uterus	131
7252	P01222	TSHB	Thyrotropin subunit beta (Thyroid-stimulating hormone subunit beta) (TSH-B) (TSH-beta) (Thyrotropin beta chain) (Thyrotropin alfa)	HP:0000013	Hypoplasia of the uterus	132
57484	Q9ULK6	RN150	RING finger protein 150	HP:0000013	Hypoplasia of the uterus	133
79145	Q9BUK0	CHCH7	Coiled-coil-helix-coiled-coil-helix domain-containing protein 7	HP:0000013	Hypoplasia of the uterus	134
685	P35070	BTC	Probetacellulin [Cleaved into: Betacellulin (BTC)]	HP:0000013	Hypoplasia of the uterus	135
245930	Q30KQ4	DB116	Beta-defensin 116 (Beta-defensin 16) (DEFB-16) (Defensin, beta 116)	HP:0000013	Hypoplasia of the uterus	136
245934	Q5J5C9	DB121	Beta-defensin 121 (Beta-defensin 21) (DEFB-21) (Defensin, beta 121)	HP:0000013	Hypoplasia of the uterus	137
2692	Q02643	GHRHR	Growth hormone-releasing hormone receptor (GHRH receptor) (Growth hormone-releasing factor receptor) (GRF receptor) (GRFR)	HP:0000013	Hypoplasia of the uterus	138
90	Q04771	ACVR1	Activin receptor type-1 (EC 2.7.11.30) (Activin receptor type I) (ACTR-I) (Activin receptor-like kinase 2) (ALK-2) (Serine/threonine-protein kinase receptor R1) (SKR1) (TGF-B superfamily receptor type I) (TSR-I)	HP:0000013	Hypoplasia of the uterus	139
1580	P13584	CP4B1	Cytochrome P450 4B1 (EC 1.14.14.1) (CYPIVB1) (Cytochrome P450-HP)	HP:0000013	Hypoplasia of the uterus	140
2251	P10767	FGF6	Fibroblast growth factor 6 (FGF-6) (Heparin secretory-transforming protein 2) (HST-2) (HSTF-2) (Heparin-binding growth factor 6) (HBGF-6)	HP:0000013	Hypoplasia of the uterus	141
84432	P58294	PROK1	Prokineticin-1 (Endocrine-gland-derived vascular endothelial growth factor) (EG-VEGF) (Mambakine)	HP:0000013	Hypoplasia of the uterus	142
2248	P11487	FGF3	Fibroblast growth factor 3 (FGF-3) (Heparin-binding growth factor 3) (HBGF-3) (Proto-oncogene Int-2)	HP:0000013	Hypoplasia of the uterus	143
8823	O43320	FGF16	Fibroblast growth factor 16 (FGF-16)	HP:0000013	Hypoplasia of the uterus	144
10637	O75610	LFTY1	Left-right determination factor 1 (Left-right determination factor B) (Protein lefty-1) (Protein lefty-B)	HP:0000013	Hypoplasia of the uterus	145
343637	Q2I0M5	RSPO4	R-spondin-4 (Roof plate-specific spondin-4) (hRspo4)	HP:0000013	Hypoplasia of the uterus	146
389549	A0PJY2	FEZF1	Fez family zinc finger protein 1 (Zinc finger protein 312B)	HP:0000013	Hypoplasia of the uterus	147
54600	O60656	UD19	UDP-glucuronosyltransferase 1A9 (UGT1A9) (EC 2.4.1.17) (UDP-glucuronosyltransferase 1-9) (UDPGT 1-9) (UGT1*9) (UGT1-09) (UGT1.9) (UDP-glucuronosyltransferase 1-I) (UGT-1I) (UGT1I) (lugP4)	HP:0000013	Hypoplasia of the uterus	148
23671	Q9UIK5	TEFF2	Tomoregulin-2 (TR-2) (Hyperplastic polyposis protein 1) (Transmembrane protein with EGF-like and two follistatin-like domains)	HP:0000013	Hypoplasia of the uterus	149
401115	Q5BLP8	CD048	Neuropeptide-like protein C4orf48	HP:0000013	Hypoplasia of the uterus	150
2186	Q12830	BPTF	Nucleosome-remodeling factor subunit BPTF (Bromodomain and PHD finger-containing transcription factor) (Fetal Alz-50 clone 1 protein) (Fetal Alzheimer antigen)	HP:0000014	Abnormality of the bladder	1
25836	Q6KC79	NIPBL	Nipped-B-like protein (Delangin) (SCC2 homolog)	HP:0000014	Abnormality of the bladder	2
58508	Q8NEZ4	KMT2C	Histone-lysine N-methyltransferase 2C (Lysine N-methyltransferase 2C) (EC 2.1.1.354) (Homologous to ALR protein) (Myeloid/lymphoid or mixed-lineage leukemia protein 3)	HP:0000014	Abnormality of the bladder	3
8085	O14686	KMT2D	Histone-lysine N-methyltransferase 2D (Lysine N-methyltransferase 2D) (EC 2.1.1.354) (ALL1-related protein) (Myeloid/lymphoid or mixed-lineage leukemia protein 2)	HP:0000014	Abnormality of the bladder	4
80208	Q96JI7	SPTCS	Spatacsin (Colorectal carcinoma-associated protein) (Spastic paraplegia 11 protein)	HP:0000014	Abnormality of the bladder	5
9757	Q9UMN6	KMT2B	Histone-lysine N-methyltransferase 2B (Lysine N-methyltransferase 2B) (EC 2.1.1.354) (Myeloid/lymphoid or mixed-lineage leukemia protein 4) (Trithorax homolog 2) (WW domain-binding protein 7) (WBP-7)	HP:0000014	Abnormality of the bladder	6
57680	Q9HCK8	CHD8	Chromodomain-helicase-DNA-binding protein 8 (CHD-8) (EC 3.6.4.12) (ATP-dependent helicase CHD8) (Helicase with SNF2 domain 1)	HP:0000014	Abnormality of the bladder	7
55870	Q9NR48	ASH1L	Histone-lysine N-methyltransferase ASH1L (EC 2.1.1.359) (EC 2.1.1.367) (ASH1-like protein) (huASH1) (Absent small and homeotic disks protein 1 homolog) (Lysine N-methyltransferase 2H)	HP:0000014	Abnormality of the bladder	8
57492	Q8NFD5	ARI1B	AT-rich interactive domain-containing protein 1B (ARID domain-containing protein 1B) (BRG1-associated factor 250b) (BAF250B) (BRG1-binding protein hELD/OSA1) (Osa homolog 2) (hOsa2) (p250R)	HP:0000014	Abnormality of the bladder	9
23067	Q9UPS6	SET1B	Histone-lysine N-methyltransferase SETD1B (EC 2.1.1.354) (Lysine N-methyltransferase 2G) (SET domain-containing protein 1B) (hSET1B)	HP:0000014	Abnormality of the bladder	10
2332	Q06787	FMR1	Synaptic functional regulator FMR1 (Fragile X mental retardation protein 1) (FMRP) (Protein FMR-1)	HP:0000014	Abnormality of the bladder	11
547	Q12756	KIF1A	Kinesin-like protein KIF1A (Axonal transporter of synaptic vesicles) (Microtubule-based motor KIF1A) (Unc-104- and KIF1A-related protein) (hUnc-104)	HP:0000014	Abnormality of the bladder	12
9968	Q93074	MED12	Mediator of RNA polymerase II transcription subunit 12 (Activator-recruited cofactor 240 kDa component) (ARC240) (CAG repeat protein 45) (Mediator complex subunit 12) (OPA-containing protein) (Thyroid hormone receptor-associated protein complex 230 kDa component) (Trap230) (Trinucleotide repeat-containing gene 11 protein)	HP:0000014	Abnormality of the bladder	13
9739	O15047	SET1A	Histone-lysine N-methyltransferase SETD1A (EC 2.1.1.354) (Lysine N-methyltransferase 2F) (SET domain-containing protein 1A) (hSET1A) (Set1/Ash2 histone methyltransferase complex subunit SET1)	HP:0000014	Abnormality of the bladder	14
26278	Q9NZJ4	SACS	Sacsin (DnaJ homolog subfamily C member 29) (DNAJC29)	HP:0000014	Abnormality of the bladder	15
1387	Q92793	CBP	CREB-binding protein (Histone lysine acetyltransferase CREBBP) (EC 2.3.1.48) (Protein-lysine acetyltransferase CREBBP) (EC 2.3.1.-)	HP:0000014	Abnormality of the bladder	16
4204	P51608	MECP2	Methyl-CpG-binding protein 2 (MeCp-2 protein) (MeCp2)	HP:0000014	Abnormality of the bladder	17
9895	O15040	TCPR2	Tectonin beta-propeller repeat-containing protein 2 (WD repeat-containing protein KIAA0329/KIAA0297)	HP:0000014	Abnormality of the bladder	18
64324	Q96L73	NSD1	Histone-lysine N-methyltransferase, H3 lysine-36 specific (EC 2.1.1.357) (Androgen receptor coactivator 267 kDa protein) (Androgen receptor-associated protein of 267 kDa) (H3-K36-HMTase) (Lysine N-methyltransferase 3B) (Nuclear receptor-binding SET domain-containing protein 1) (NR-binding SET domain-containing protein)	HP:0000014	Abnormality of the bladder	19
4297	Q03164	KMT2A	Histone-lysine N-methyltransferase 2A (Lysine N-methyltransferase 2A) (EC 2.1.1.354) (ALL-1) (CXXC-type zinc finger protein 7) (Myeloid/lymphoid or mixed-lineage leukemia) (Myeloid/lymphoid or mixed-lineage leukemia protein 1) (Trithorax-like protein) (Zinc finger protein HRX) [Cleaved into: MLL cleavage product N320 (N-terminal cleavage product of 320 kDa) (p320); MLL cleavage product C180 (C-te…	HP:0000014	Abnormality of the bladder	20
3064	P42858	HD	Huntingtin (Huntington disease protein) (HD protein) [Cleaved into: Huntingtin, myristoylated N-terminal fragment]	HP:0000014	Abnormality of the bladder	21
8289	O14497	ARI1A	AT-rich interactive domain-containing protein 1A (ARID domain-containing protein 1A) (B120) (BRG1-associated factor 250) (BAF250) (BRG1-associated factor 250a) (BAF250A) (Osa homolog 1) (hOSA1) (SWI-like protein) (SWI/SNF complex protein p270) (SWI/SNF-related, matrix-associated, actin-dependent regulator of chromatin subfamily F member 1) (hELD)	HP:0000014	Abnormality of the bladder	22
8295	Q9Y4A5	TRRAP	Transformation/transcription domain-associated protein (350/400 kDa PCAF-associated factor) (PAF350/400) (STAF40) (Tra1 homolog)	HP:0000014	Abnormality of the bladder	23
23389	Q71F56	MD13L	Mediator of RNA polymerase II transcription subunit 13-like (Mediator complex subunit 13-like) (Thyroid hormone receptor-associated protein 2) (Thyroid hormone receptor-associated protein complex 240 kDa component-like)	HP:0000014	Abnormality of the bladder	24
8573	O14936	CSKP	Peripheral plasma membrane protein CASK (hCASK) (EC 2.7.11.1) (Calcium/calmodulin-dependent serine protein kinase) (Protein lin-2 homolog)	HP:0000014	Abnormality of the bladder	25
196528	Q68CP9	ARID2	AT-rich interactive domain-containing protein 2 (ARID domain-containing protein 2) (BRG1-associated factor 200) (BAF200) (Zinc finger protein with activation potential) (Zipzap/p200)	HP:0000014	Abnormality of the bladder	26
6311	Q99700	ATX2	Ataxin-2 (Spinocerebellar ataxia type 2 protein) (Trinucleotide repeat-containing gene 13 protein)	HP:0000014	Abnormality of the bladder	27
29072	Q9BYW2	SETD2	Histone-lysine N-methyltransferase SETD2 (EC 2.1.1.359) (HIF-1) (Huntingtin yeast partner B) (Huntingtin-interacting protein 1) (HIP-1) (Huntingtin-interacting protein B) (Lysine N-methyltransferase 3A) (Protein-lysine N-methyltransferase SETD2) (EC 2.1.1.-) (SET domain-containing protein 2) (hSET2) (p231HBP)	HP:0000014	Abnormality of the bladder	28
3798	Q12840	KIF5A	Kinesin heavy chain isoform 5A (Kinesin heavy chain neuron-specific 1) (Neuronal kinesin heavy chain) (NKHC)	HP:0000014	Abnormality of the bladder	29
6597	P51532	SMCA4	Transcription activator BRG1 (EC 3.6.4.-) (ATP-dependent helicase SMARCA4) (BRG1-associated factor 190A) (BAF190A) (Mitotic growth and transcription activator) (Protein BRG-1) (Protein brahma homolog 1) (SNF2-beta) (SWI/SNF-related matrix-associated actin-dependent regulator of chromatin subfamily A member 4)	HP:0000014	Abnormality of the bladder	30
2033	Q09472	EP300	Histone acetyltransferase p300 (p300 HAT) (EC 2.3.1.48) (E1A-associated protein p300) (Histone butyryltransferase p300) (EC 2.3.1.-) (Histone crotonyltransferase p300) (EC 2.3.1.-) (Protein 2-hydroxyisobutyryltransferase p300) (EC 2.3.1.-) (Protein lactyltransferas p300) (EC 2.3.1.-) (Protein propionyltransferase p300) (EC 2.3.1.-)	HP:0000014	Abnormality of the bladder	31
9909	O75064	DEN4B	DENN domain-containing protein 4B	HP:0000014	Abnormality of the bladder	32
23503	Q68DK2	ZFY26	Zinc finger FYVE domain-containing protein 26 (FYVE domain-containing centrosomal protein) (FYVE-CENT) (Spastizin)	HP:0000014	Abnormality of the bladder	33
10908	Q8IY17	PLPL6	Patatin-like phospholipase domain-containing protein 6 (EC 3.1.1.5) (Neuropathy target esterase)	HP:0000014	Abnormality of the bladder	34
546	P46100	ATRX	Transcriptional regulator ATRX (EC 3.6.4.12) (ATP-dependent helicase ATRX) (X-linked helicase II) (X-linked nuclear protein) (XNP) (Znf-HX)	HP:0000014	Abnormality of the bladder	35
4747	P07196	NFL	Neurofilament light polypeptide (NF-L) (68 kDa neurofilament protein) (Neurofilament triplet L protein)	HP:0000014	Abnormality of the bladder	36
60	P60709	ACTB	Actin, cytoplasmic 1 (Beta-actin) [Cleaved into: Actin, cytoplasmic 1, N-terminally processed]	HP:0000014	Abnormality of the bladder	37
4287	P54252	ATX3	Ataxin-3 (EC 3.4.19.12) (Machado-Joseph disease protein 1) (Spinocerebellar ataxia type 3 protein)	HP:0000014	Abnormality of the bladder	38
55193	Q86U86	PB1	Protein polybromo-1 (hPB1) (BRG1-associated factor 180) (BAF180) (Polybromo-1D)	HP:0000014	Abnormality of the bladder	39
80205	Q3L8U1	CHD9	Chromodomain-helicase-DNA-binding protein 9 (CHD-9) (EC 3.6.4.12) (ATP-dependent helicase CHD9) (Chromatin-related mesenchymal modulator) (CReMM) (Chromatin-remodeling factor CHROM1) (Kismet homolog 2) (PPAR-alpha-interacting complex protein 320 kDa) (Peroxisomal proliferator-activated receptor A-interacting complex 320 kDa protein)	HP:0000014	Abnormality of the bladder	40
50944	Q9Y566	SHAN1	SH3 and multiple ankyrin repeat domains protein 1 (Shank1) (Somatostatin receptor-interacting protein) (SSTR-interacting protein) (SSTRIP)	HP:0000014	Abnormality of the bladder	41
1499	P35222	CTNB1	Catenin beta-1 (Beta-catenin)	HP:0000014	Abnormality of the bladder	42
3065	Q13547	HDAC1	Histone deacetylase 1 (HD1) (EC 3.5.1.98)	HP:0000014	Abnormality of the bladder	43
55209	Q9C0A6	SETD5	Histone-lysine N-methyltransferase SETD5 (EC 2.1.1.359) (EC 2.1.1.367) (SET domain-containing protein 5)	HP:0000014	Abnormality of the bladder	44
51412	O94805	ACL6B	Actin-like protein 6B (53 kDa BRG1-associated factor B) (Actin-related protein Baf53b) (ArpNalpha) (BRG1-associated factor 53B) (BAF53B)	HP:0000014	Abnormality of the bladder	45
6595	P51531	SMCA2	Probable global transcription activator SNF2L2 (EC 3.6.4.-) (ATP-dependent helicase SMARCA2) (BRG1-associated factor 190B) (BAF190B) (Protein brahma homolog) (hBRM) (SNF2-alpha) (SWI/SNF-related matrix-associated actin-dependent regulator of chromatin subfamily A member 2)	HP:0000014	Abnormality of the bladder	46
55636	Q9P2D1	CHD7	Chromodomain-helicase-DNA-binding protein 7 (CHD-7) (EC 3.6.4.12) (ATP-dependent helicase CHD7)	HP:0000014	Abnormality of the bladder	47
25942	Q96ST3	SIN3A	Paired amphipathic helix protein Sin3a (Histone deacetylase complex subunit Sin3a) (Transcriptional corepressor Sin3a)	HP:0000014	Abnormality of the bladder	48
23309	O75182	SIN3B	Paired amphipathic helix protein Sin3b (Histone deacetylase complex subunit Sin3b) (Transcriptional corepressor Sin3b)	HP:0000014	Abnormality of the bladder	49
11083	Q9BTC0	DIDO1	Death-inducer obliterator 1 (DIO-1) (hDido1) (Death-associated transcription factor 1) (DATF-1)	HP:0000014	Abnormality of the bladder	50
6594	P28370	SMCA1	Probable global transcription activator SNF2L1 (EC 3.6.4.-) (ATP-dependent helicase SMARCA1) (Nucleosome-remodeling factor subunit SNF2L) (SWI/SNF-related matrix-associated actin-dependent regulator of chromatin subfamily A member 1)	HP:0000014	Abnormality of the bladder	51
2146	Q15910	EZH2	Histone-lysine N-methyltransferase EZH2 (EC 2.1.1.356) (ENX-1) (Enhancer of zeste homolog 2) (Lysine N-methyltransferase 6)	HP:0000014	Abnormality of the bladder	52
23126	Q7Z3K3	POGZ	Pogo transposable element with ZNF domain (Suppressor of hairy wing homolog 5) (Zinc finger protein 280E) (Zinc finger protein 635)	HP:0000014	Abnormality of the bladder	53
9907	O43299	AP5Z1	AP-5 complex subunit zeta-1 (Adaptor-related protein complex 5 zeta subunit) (Zeta5)	HP:0000014	Abnormality of the bladder	54
8242	P41229	KDM5C	Lysine-specific demethylase 5C (EC 1.14.11.67) (Histone demethylase JARID1C) (Jumonji/ARID domain-containing protein 1C) (Protein SmcX) (Protein Xe169) ([histone H3]-trimethyl-L-lysine(4) demethylase 5C)	HP:0000014	Abnormality of the bladder	55
57030	Q9P2U7	VGLU1	Vesicular glutamate transporter 1 (VGluT1) (Brain-specific Na(+)-dependent inorganic phosphate cotransporter) (Solute carrier family 17 member 7)	HP:0000014	Abnormality of the bladder	56
7403	O15550	KDM6A	Lysine-specific demethylase 6A (EC 1.14.11.68) (Histone demethylase UTX) (Ubiquitously-transcribed TPR protein on the X chromosome) (Ubiquitously-transcribed X chromosome tetratricopeptide repeat protein) ([histone H3]-trimethyl-L-lysine(27) demethylase 6A)	HP:0000014	Abnormality of the bladder	57
4744	P12036	NFH	Neurofilament heavy polypeptide (NF-H) (200 kDa neurofilament protein) (Neurofilament triplet H protein)	HP:0000014	Abnormality of the bladder	58
57634	Q96L91	EP400	E1A-binding protein p400 (EC 3.6.4.-) (CAG repeat protein 32) (Domino homolog) (hDomino) (Trinucleotide repeat-containing gene 12 protein) (p400 kDa SWI2/SNF2-related protein)	HP:0000014	Abnormality of the bladder	59
4763	P21359	NF1	Neurofibromin (Neurofibromatosis-related protein NF-1) [Cleaved into: Neurofibromin truncated]	HP:0000014	Abnormality of the bladder	60
3054	P51610	HCFC1	Host cell factor 1 (HCF) (HCF-1) (C1 factor) (CFF) (VCAF) (VP16 accessory protein) [Cleaved into: HCF N-terminal chain 1; HCF N-terminal chain 2; HCF N-terminal chain 3; HCF N-terminal chain 4; HCF N-terminal chain 5; HCF N-terminal chain 6; HCF C-terminal chain 1; HCF C-terminal chain 2; HCF C-terminal chain 3; HCF C-terminal chain 4; HCF C-terminal chain 5; HCF C-terminal chain 6]	HP:0000014	Abnormality of the bladder	61
71	P63261	ACTG	Actin, cytoplasmic 2 (Gamma-actin) [Cleaved into: Actin, cytoplasmic 2, N-terminally processed]	HP:0000014	Abnormality of the bladder	62
6622	P37840	SYUA	Alpha-synuclein (Non-A beta component of AD amyloid) (Non-A4 component of amyloid precursor) (NACP)	HP:0000014	Abnormality of the bladder	63
9612	Q9Y618	NCOR2	Nuclear receptor corepressor 2 (N-CoR2) (CTG repeat protein 26) (SMAP270) (Silencing mediator of retinoic acid and thyroid hormone receptor) (SMRT) (T3 receptor-associating factor) (TRAC) (Thyroid-, retinoic-acid-receptor-associated corepressor)	HP:0000014	Abnormality of the bladder	64
26580	Q96G97	BSCL2	Seipin (Bernardinelli-Seip congenital lipodystrophy type 2 protein)	HP:0000014	Abnormality of the bladder	65
26040	Q9Y6X0	SETBP	SET-binding protein (SEB)	HP:0000014	Abnormality of the bladder	66
79813	Q9H9B1	EHMT1	Histone-lysine N-methyltransferase EHMT1 (EC 2.1.1.-) (Euchromatic histone-lysine N-methyltransferase 1) (Eu-HMTase1) (G9a-like protein 1) (GLP) (GLP1) (Histone H3-K9 methyltransferase 5) (H3-K9-HMTase 5) (Lysine N-methyltransferase 1D)	HP:0000014	Abnormality of the bladder	67
1105	O14646	CHD1	Chromodomain-helicase-DNA-binding protein 1 (CHD-1) (EC 3.6.4.12) (ATP-dependent helicase CHD1)	HP:0000014	Abnormality of the bladder	68
2890	P42261	GRIA1	Glutamate receptor 1 (GluR-1) (AMPA-selective glutamate receptor 1) (GluR-A) (GluR-K1) (Glutamate receptor ionotropic, AMPA 1) (GluA1)	HP:0000014	Abnormality of the bladder	69
440686	Q5TEC6	H3PS2	Histone HIST2H3PS2	HP:0000014	Abnormality of the bladder	70
4851	P46531	NOTC1	Neurogenic locus notch homolog protein 1 (Notch 1) (hN1) (Translocation-associated notch protein TAN-1) [Cleaved into: Notch 1 extracellular truncation (NEXT); Notch 1 intracellular domain (NICD)]	HP:0000014	Abnormality of the bladder	71
9070	Q9UBL3	ASH2L	Set1/Ash2 histone methyltransferase complex subunit ASH2 (ASH2-like protein)	HP:0000014	Abnormality of the bladder	72
6598	Q12824	SNF5	SWI/SNF-related matrix-associated actin-dependent regulator of chromatin subfamily B member 1 (BRG1-associated factor 47) (BAF47) (Integrase interactor 1 protein) (SNF5 homolog) (hSNF5)	HP:0000014	Abnormality of the bladder	73
55904	Q8IZD2	KMT2E	Inactive histone-lysine N-methyltransferase 2E (Inactive lysine N-methyltransferase 2E) (Myeloid/lymphoid or mixed-lineage leukemia protein 5)	HP:0000014	Abnormality of the bladder	74
10847	Q6ZRS2	SRCAP	Helicase SRCAP (EC 3.6.4.-) (Domino homolog 2) (Snf2-related CBP activator)	HP:0000014	Abnormality of the bladder	75
6601	Q8TAQ2	SMRC2	SWI/SNF complex subunit SMARCC2 (BRG1-associated factor 170) (BAF170) (SWI/SNF complex 170 kDa subunit) (SWI/SNF-related matrix-associated actin-dependent regulator of chromatin subfamily C member 2)	HP:0000014	Abnormality of the bladder	76
6683	Q9UBP0	SPAST	Spastin (EC 5.6.1.1) (Spastic paraplegia 4 protein)	HP:0000014	Abnormality of the bladder	77
51366	O95071	UBR5	E3 ubiquitin-protein ligase UBR5 (EC 2.3.2.26) (E3 ubiquitin-protein ligase, HECT domain-containing 1) (HECT-type E3 ubiquitin transferase UBR5) (Hyperplastic discs protein homolog) (hHYD) (Progestin-induced protein)	HP:0000014	Abnormality of the bladder	78
57165	Q5T442	CXG2	Gap junction gamma-2 protein (Connexin-46.6) (Cx46.6) (Connexin-47) (Cx47) (Gap junction alpha-12 protein)	HP:0000014	Abnormality of the bladder	79
3265	P01112	RASH	GTPase HRas (EC 3.6.5.2) (H-Ras-1) (Ha-Ras) (Transforming protein p21) (c-H-ras) (p21ras) [Cleaved into: GTPase HRas, N-terminally processed]	HP:0000014	Abnormality of the bladder	80
10919	Q96KQ7	EHMT2	Histone-lysine N-methyltransferase EHMT2 (EC 2.1.1.-) (Euchromatic histone-lysine N-methyltransferase 2) (HLA-B-associated transcript 8) (Histone H3-K9 methyltransferase 3) (H3-K9-HMTase 3) (Lysine N-methyltransferase 1C) (Protein G9a)	HP:0000014	Abnormality of the bladder	81
9611	O75376	NCOR1	Nuclear receptor corepressor 1 (N-CoR) (N-CoR1)	HP:0000014	Abnormality of the bladder	82
7175	P12270	TPR	Nucleoprotein TPR (Megator) (NPC-associated intranuclear protein) (Translocated promoter region protein)	HP:0000014	Abnormality of the bladder	83
1995	Q14576	ELAV3	ELAV-like protein 3 (Hu-antigen C) (HuC) (Paraneoplastic cerebellar degeneration-associated antigen) (Paraneoplastic limbic encephalitis antigen 21)	HP:0000014	Abnormality of the bladder	84
8831	Q96PV0	SYGP1	Ras/Rap GTPase-activating protein SynGAP (Neuronal RasGAP) (Synaptic Ras GTPase-activating protein 1) (Synaptic Ras-GAP 1)	HP:0000014	Abnormality of the bladder	85
9969	Q9UHV7	MED13	Mediator of RNA polymerase II transcription subunit 13 (Activator-recruited cofactor 250 kDa component) (ARC250) (Mediator complex subunit 13) (Thyroid hormone receptor-associated protein 1) (Thyroid hormone receptor-associated protein complex 240 kDa component) (Trap240) (Vitamin D3 receptor-interacting protein complex component DRIP250) (DRIP250)	HP:0000014	Abnormality of the bladder	86
4137	P10636	TAU	Microtubule-associated protein tau (Neurofibrillary tangle protein) (Paired helical filament-tau) (PHF-tau)	HP:0000014	Abnormality of the bladder	87
3066	Q92769	HDAC2	Histone deacetylase 2 (HD2) (EC 3.5.1.98)	HP:0000014	Abnormality of the bladder	88
84629	O15417	TNC18	Trinucleotide repeat-containing gene 18 protein (Long CAG trinucleotide repeat-containing gene 79 protein)	HP:0000014	Abnormality of the bladder	89
1107	Q12873	CHD3	Chromodomain-helicase-DNA-binding protein 3 (CHD-3) (EC 3.6.4.12) (ATP-dependent helicase CHD3) (Mi-2 autoantigen 240 kDa protein) (Mi2-alpha) (Zinc finger helicase) (hZFH)	HP:0000014	Abnormality of the bladder	90
22941	Q9UPX8	SHAN2	SH3 and multiple ankyrin repeat domains protein 2 (Shank2) (Cortactin-binding protein 1) (CortBP1) (Proline-rich synapse-associated protein 1)	HP:0000014	Abnormality of the bladder	91
23013	Q96T58	MINT	Msx2-interacting protein (SMART/HDAC1-associated repressor protein) (SPEN homolog)	HP:0000014	Abnormality of the bladder	92
10381	Q13509	TBB3	Tubulin beta-3 chain (Tubulin beta-4 chain) (Tubulin beta-III)	HP:0000014	Abnormality of the bladder	93
207	P31749	AKT1	RAC-alpha serine/threonine-protein kinase (EC 2.7.11.1) (Protein kinase B) (PKB) (Protein kinase B alpha) (PKB alpha) (Proto-oncogene c-Akt) (RAC-PK-alpha)	HP:0000014	Abnormality of the bladder	94
6326	Q99250	SCN2A	Sodium channel protein type 2 subunit alpha (HBSC II) (Sodium channel protein brain II subunit alpha) (Sodium channel protein type II subunit alpha) (Voltage-gated sodium channel subunit alpha Nav1.2)	HP:0000014	Abnormality of the bladder	95
6305	O95248	MTMR5	Myotubularin-related protein 5 (Inactive phosphatidylinositol 3-phosphatase 5) (SET-binding factor 1) (Sbf1)	HP:0000014	Abnormality of the bladder	96
6599	Q92922	SMRC1	SWI/SNF complex subunit SMARCC1 (BRG1-associated factor 155) (BAF155) (SWI/SNF complex 155 kDa subunit) (SWI/SNF-related matrix-associated actin-dependent regulator of chromatin subfamily C member 1)	HP:0000014	Abnormality of the bladder	97
64844	Q9H992	MARH7	E3 ubiquitin-protein ligase MARCHF7 (EC 2.3.2.27) (Axotrophin) (Membrane-associated RING finger protein 7) (Membrane-associated RING-CH protein VII) (MARCH-VII) (RING finger protein 177) (RING-type E3 ubiquitin transferase MARCHF7)	HP:0000014	Abnormality of the bladder	98
7402	P46939	UTRO	Utrophin (Dystrophin-related protein 1) (DRP-1)	HP:0000014	Abnormality of the bladder	99
9044	O14981	BTAF1	TATA-binding protein-associated factor 172 (EC 3.6.4.-) (ATP-dependent helicase BTAF1) (B-TFIID transcription factor-associated 170 kDa subunit) (TAF(II)170) (TBP-associated factor 172) (TAF-172)	HP:0000014	Abnormality of the bladder	100
2597	P04406	G3P	Glyceraldehyde-3-phosphate dehydrogenase (GAPDH) (EC 1.2.1.12) (Peptidyl-cysteine S-nitrosylase GAPDH) (EC 2.6.99.-)	HP:0000014	Abnormality of the bladder	101
23512	Q15022	SUZ12	Polycomb protein SUZ12 (Chromatin precipitated E2F target 9 protein) (ChET 9 protein) (Joined to JAZF1 protein) (Suppressor of zeste 12 protein homolog)	HP:0000014	Abnormality of the bladder	102
51742	Q4LE39	ARI4B	AT-rich interactive domain-containing protein 4B (ARID domain-containing protein 4B) (180 kDa Sin3-associated polypeptide) (Sin3-associated polypeptide p180) (Breast cancer-associated antigen BRCAA1) (Histone deacetylase complex subunit SAP180) (Retinoblastoma-binding protein 1-like 1)	HP:0000014	Abnormality of the bladder	103
55777	Q9P267	MBD5	Methyl-CpG-binding domain protein 5 (Methyl-CpG-binding protein MBD5)	HP:0000014	Abnormality of the bladder	104
80853	Q6ZMT4	KDM7A	Lysine-specific demethylase 7A (EC 1.14.11.-) (JmjC domain-containing histone demethylation protein 1D) (Lysine-specific demethylase 7)	HP:0000014	Abnormality of the bladder	105
7468	O96028	NSD2	Histone-lysine N-methyltransferase NSD2 (EC 2.1.1.357) (Multiple myeloma SET domain-containing protein) (MMSET) (Nuclear SET domain-containing protein 2) (Protein trithorax-5) (Wolf-Hirschhorn syndrome candidate 1 protein)	HP:0000014	Abnormality of the bladder	106
81846	Q86WG5	MTMRD	Myotubularin-related protein 13 (Inactive phosphatidylinositol 3-phosphatase 13) (SET-binding factor 2)	HP:0000014	Abnormality of the bladder	107
10524	Q92993	KAT5	Histone acetyltransferase KAT5 (EC 2.3.1.48) (60 kDa Tat-interactive protein) (Tip60) (Histone acetyltransferase HTATIP) (HIV-1 Tat interactive protein) (Lysine acetyltransferase 5) (cPLA(2)-interacting protein)	HP:0000014	Abnormality of the bladder	108
23431	Q9UPM8	AP4E1	AP-4 complex subunit epsilon-1 (AP-4 adaptor complex subunit epsilon) (Adaptor-related protein complex 4 subunit epsilon-1) (Epsilon subunit of AP-4) (Epsilon-adaptin)	HP:0000014	Abnormality of the bladder	109
1108	Q14839	CHD4	Chromodomain-helicase-DNA-binding protein 4 (CHD-4) (EC 3.6.4.12) (ATP-dependent helicase CHD4) (Mi-2 autoantigen 218 kDa protein) (Mi2-beta)	HP:0000014	Abnormality of the bladder	110
26038	Q8TDI0	CHD5	Chromodomain-helicase-DNA-binding protein 5 (CHD-5) (EC 3.6.4.12) (ATP-dependent helicase CHD5)	HP:0000014	Abnormality of the bladder	111
6942	Q9UGU0	TCF20	Transcription factor 20 (TCF-20) (Nuclear factor SPBP) (Protein AR1) (Stromelysin-1 PDGF-responsive element-binding protein) (SPRE-binding protein)	HP:0000014	Abnormality of the bladder	112
2902	Q05586	NMDZ1	Glutamate receptor ionotropic, NMDA 1 (GluN1) (Glutamate [NMDA] receptor subunit zeta-1) (N-methyl-D-aspartate receptor subunit NR1) (NMD-R1)	HP:0000014	Abnormality of the bladder	113
84444	Q8TEK3	DOT1L	Histone-lysine N-methyltransferase, H3 lysine-79 specific (EC 2.1.1.360) (DOT1-like protein) (Histone H3-K79 methyltransferase) (H3-K79-HMTase) (Lysine N-methyltransferase 4)	HP:0000014	Abnormality of the bladder	114
140679	Q9H598	VIAAT	Vesicular inhibitory amino acid transporter (GABA and glycine transporter) (Solute carrier family 32 member 1) (Vesicular GABA transporter) (hVIAAT)	HP:0000014	Abnormality of the bladder	115
55252	Q76L83	ASXL2	Putative Polycomb group protein ASXL2 (Additional sex combs-like protein 2)	HP:0000014	Abnormality of the bladder	116
6872	P21675	TAF1	Transcription initiation factor TFIID subunit 1 (EC 2.3.1.48) (EC 2.7.11.1) (Cell cycle gene 1 protein) (TBP-associated factor 250 kDa) (p250) (Transcription initiation factor TFIID 250 kDa subunit) (TAF(II)250) (TAFII-250) (TAFII250)	HP:0000014	Abnormality of the bladder	117
54904	Q9BZ95	NSD3	Histone-lysine N-methyltransferase NSD3 (EC 2.1.1.370) (EC 2.1.1.371) (Nuclear SET domain-containing protein 3) (Protein whistle) (WHSC1-like 1 isoform 9 with methyltransferase activity to lysine) (Wolf-Hirschhorn syndrome candidate 1-like protein 1) (WHSC1-like protein 1)	HP:0000014	Abnormality of the bladder	118
2571	Q99259	DCE1	Glutamate decarboxylase 1 (EC 4.1.1.15) (67 kDa glutamic acid decarboxylase) (GAD-67) (Glutamate decarboxylase 67 kDa isoform)	HP:0000014	Abnormality of the bladder	119
23476	O60885	BRD4	Bromodomain-containing protein 4 (Protein HUNK1)	HP:0000014	Abnormality of the bladder	120
2891	P42262	GRIA2	Glutamate receptor 2 (GluR-2) (AMPA-selective glutamate receptor 2) (GluR-B) (GluR-K2) (Glutamate receptor ionotropic, AMPA 2) (GluA2)	HP:0000014	Abnormality of the bladder	121
80816	Q9C0F0	ASXL3	Putative Polycomb group protein ASXL3 (Additional sex combs-like protein 3)	HP:0000014	Abnormality of the bladder	122
9897	Q12768	WASC5	WASH complex subunit 5 (Strumpellin) (WASH complex subunit strumpellin)	HP:0000014	Abnormality of the bladder	123
4983	O60890	OPHN1	Oligophrenin-1	HP:0000014	Abnormality of the bladder	124
6855	P08247	SYPH	Synaptophysin (Major synaptic vesicle protein p38)	HP:0000014	Abnormality of the bladder	125
8927	Q9UPA5	BSN	Protein bassoon (Zinc finger protein 231)	HP:0000014	Abnormality of the bladder	126
6853	P17600	SYN1	Synapsin-1 (Brain protein 4.1) (Synapsin I)	HP:0000014	Abnormality of the bladder	127
6657	P48431	SOX2	Transcription factor SOX-2	HP:0000014	Abnormality of the bladder	128
2475	P42345	MTOR	Serine/threonine-protein kinase mTOR (EC 2.7.11.1) (FK506-binding protein 12-rapamycin complex-associated protein 1) (FKBP12-rapamycin complex-associated protein) (Mammalian target of rapamycin) (mTOR) (Mechanistic target of rapamycin) (Rapamycin and FKBP12 target 1) (Rapamycin target protein 1)	HP:0000014	Abnormality of the bladder	129
84181	Q8TD26	CHD6	Chromodomain-helicase-DNA-binding protein 6 (CHD-6) (EC 3.6.4.12) (ATP-dependent helicase CHD6) (Radiation-induced gene B protein)	HP:0000014	Abnormality of the bladder	130
815	Q9UQM7	KCC2A	Calcium/calmodulin-dependent protein kinase type II subunit alpha (CaM kinase II subunit alpha) (CaMK-II subunit alpha) (EC 2.7.11.17)	HP:0000014	Abnormality of the bladder	131
23081	Q9H3R0	KDM4C	Lysine-specific demethylase 4C (EC 1.14.11.66) (Gene amplified in squamous cell carcinoma 1 protein) (GASC-1 protein) (JmjC domain-containing histone demethylation protein 3C) (Jumonji domain-containing protein 2C) ([histone H3]-trimethyl-L-lysine(9) demethylase 4C)	HP:0000014	Abnormality of the bladder	132
6839	O43463	SUV91	Histone-lysine N-methyltransferase SUV39H1 (EC 2.1.1.355) (Histone H3-K9 methyltransferase 1) (H3-K9-HMTase 1) (Lysine N-methyltransferase 1A) (Position-effect variegation 3-9 homolog) (Suppressor of variegation 3-9 homolog 1) (Su(var)3-9 homolog 1)	HP:0000014	Abnormality of the bladder	133
7994	Q92794	KAT6A	Histone acetyltransferase KAT6A (EC 2.3.1.48) (MOZ, YBF2/SAS3, SAS2 and TIP60 protein 3) (MYST-3) (Monocytic leukemia zinc finger protein) (Runt-related transcription factor-binding protein 2) (Zinc finger protein 220)	HP:0000014	Abnormality of the bladder	134
8850	Q92831	KAT2B	Histone acetyltransferase KAT2B (EC 2.3.1.48) (Histone acetyltransferase PCAF) (Histone acetylase PCAF) (Lysine acetyltransferase 2B) (P300/CBP-associated factor) (P/CAF) (Spermidine acetyltransferase KAT2B) (EC 2.3.1.57)	HP:0000014	Abnormality of the bladder	135
2580	O14976	GAK	Cyclin-G-associated kinase (EC 2.7.11.1)	HP:0000014	Abnormality of the bladder	136
2648	Q92830	KAT2A	Histone acetyltransferase KAT2A (EC 2.3.1.48) (General control of amino acid synthesis protein 5-like 2) (Histone acetyltransferase GCN5) (hGCN5) (Histone glutaryltransferase KAT2A) (EC 2.3.1.-) (Histone succinyltransferase KAT2A) (EC 2.3.1.-) (Lysine acetyltransferase 2A) (STAF97)	HP:0000014	Abnormality of the bladder	137
6792	O76039	CDKL5	Cyclin-dependent kinase-like 5 (EC 2.7.11.22) (Serine/threonine-protein kinase 9)	HP:0000014	Abnormality of the bladder	138
9927	O95140	MFN2	Mitofusin-2 (EC 3.6.5.-) (Transmembrane GTPase MFN2)	HP:0000014	Abnormality of the bladder	139
146713	A6NFN3	RFOX3	RNA binding protein fox-1 homolog 3 (Fox-1 homolog C) (Neuronal nuclei antigen) (NeuN antigen)	HP:0000014	Abnormality of the bladder	140
29994	Q9UIF8	BAZ2B	Bromodomain adjacent to zinc finger domain protein 2B (hWALp4)	HP:0000014	Abnormality of the bladder	141
1859	Q13627	DYR1A	Dual specificity tyrosine-phosphorylation-regulated kinase 1A (EC 2.7.12.1) (Dual specificity YAK1-related kinase) (HP86) (Protein kinase minibrain homolog) (MNBH) (hMNB)	HP:0000014	Abnormality of the bladder	142
1996	P26378	ELAV4	ELAV-like protein 4 (Hu-antigen D) (HuD) (Paraneoplastic encephalomyelitis antigen HuD)	HP:0000014	Abnormality of the bladder	143
6616	P60880	SNP25	Synaptosomal-associated protein 25 (SNAP-25) (Super protein) (SUP) (Synaptosomal-associated 25 kDa protein)	HP:0000014	Abnormality of the bladder	144
54617	Q9ULG1	INO80	Chromatin-remodeling ATPase INO80 (hINO80) (EC 3.6.4.-) (DNA helicase-related INO80 complex homolog 1) (DNA helicase-related protein INO80) (INO80 complex subunit A)	HP:0000014	Abnormality of the bladder	145
58512	O95886	DLGP3	Disks large-associated protein 3 (DAP-3) (PSD-95/SAP90-binding protein 3) (SAP90/PSD-95-associated protein 3) (SAPAP3)	HP:0000014	Abnormality of the bladder	146
2572	Q05329	DCE2	Glutamate decarboxylase 2 (EC 4.1.1.15) (65 kDa glutamic acid decarboxylase) (GAD-65) (Glutamate decarboxylase 65 kDa isoform)	HP:0000014	Abnormality of the bladder	147
51317	Q96BD5	PF21A	PHD finger protein 21A (BHC80a) (BRAF35-HDAC complex protein BHC80)	HP:0000014	Abnormality of the bladder	148
2898	Q13002	GRIK2	Glutamate receptor ionotropic, kainate 2 (GluK2) (Excitatory amino acid receptor 4) (EAA4) (Glutamate receptor 6) (GluR-6) (GluR6)	HP:0000014	Abnormality of the bladder	149
9459	Q15052	ARHG6	Rho guanine nucleotide exchange factor 6 (Alpha-Pix) (COOL-2) (PAK-interacting exchange factor alpha) (Rac/Cdc42 guanine nucleotide exchange factor 6)	HP:0000014	Abnormality of the bladder	150
1281	P02461	CO3A1	Collagen alpha-1(III) chain	HP:0000015	Bladder diverticulum	1
1278	P08123	CO1A2	Collagen alpha-2(I) chain (Alpha-2 type I collagen)	HP:0000015	Bladder diverticulum	2
1290	P05997	CO5A2	Collagen alpha-2(V) chain	HP:0000015	Bladder diverticulum	3
1289	P20908	CO5A1	Collagen alpha-1(V) chain	HP:0000015	Bladder diverticulum	4
1277	P02452	CO1A1	Collagen alpha-1(I) chain (Alpha-1 type I collagen)	HP:0000015	Bladder diverticulum	5
1301	P12107	COBA1	Collagen alpha-1(XI) chain	HP:0000015	Bladder diverticulum	6
1291	P12109	CO6A1	Collagen alpha-1(VI) chain	HP:0000015	Bladder diverticulum	7
1303	Q99715	COCA1	Collagen alpha-1(XII) chain	HP:0000015	Bladder diverticulum	8
1280	P02458	CO2A1	Collagen alpha-1(II) chain (Alpha-1 type II collagen) [Cleaved into: Collagen alpha-1(II) chain; Chondrocalcin]	HP:0000015	Bladder diverticulum	9
1292	P12110	CO6A2	Collagen alpha-2(VI) chain	HP:0000015	Bladder diverticulum	10
1282	P02462	CO4A1	Collagen alpha-1(IV) chain [Cleaved into: Arresten]	HP:0000015	Bladder diverticulum	11
80781	P39060	COIA1	Collagen alpha-1(XVIII) chain [Cleaved into: Endostatin; Non-collagenous domain 1 (NC1)]	HP:0000015	Bladder diverticulum	12
1293	P12111	CO6A3	Collagen alpha-3(VI) chain	HP:0000015	Bladder diverticulum	13
5118	Q15113	PCOC1	Procollagen C-endopeptidase enhancer 1 (Procollagen COOH-terminal proteinase enhancer 1) (PCPE-1) (Procollagen C-proteinase enhancer 1) (Type 1 procollagen C-proteinase enhancer protein) (Type I procollagen COOH-terminal proteinase enhancer)	HP:0000015	Bladder diverticulum	14
7373	Q05707	COEA1	Collagen alpha-1(XIV) chain (Undulin)	HP:0000015	Bladder diverticulum	15
4016	Q08397	LOXL1	Lysyl oxidase homolog 1 (EC 1.4.3.-) (Lysyl oxidase-like protein 1) (LOL)	HP:0000015	Bladder diverticulum	16
2006	P15502	ELN	Elastin (Tropoelastin)	HP:0000015	Bladder diverticulum	17
10631	Q15063	POSTN	Periostin (PN) (Osteoblast-specific factor 2) (OSF-2)	HP:0000015	Bladder diverticulum	18
1284	P08572	CO4A2	Collagen alpha-2(IV) chain [Cleaved into: Canstatin]	HP:0000015	Bladder diverticulum	19
5351	Q02809	PLOD1	Procollagen-lysine,2-oxoglutarate 5-dioxygenase 1 (EC 1.14.11.4) (Lysyl hydroxylase 1) (LH1)	HP:0000015	Bladder diverticulum	20
4017	Q9Y4K0	LOXL2	Lysyl oxidase homolog 2 (EC 1.4.3.13) (Lysyl oxidase-like protein 2) (Lysyl oxidase-related protein 2) (Lysyl oxidase-related protein WS9-14)	HP:0000015	Bladder diverticulum	21
1298	Q14055	CO9A2	Collagen alpha-2(IX) chain	HP:0000015	Bladder diverticulum	22
1306	P39059	COFA1	Collagen alpha-1(XV) chain [Cleaved into: Restin (Endostatin-XV) (Related to endostatin) (Restin-I); Restin-2 (Restin-II); Restin-3 (Restin-III); Restin-4 (Restin-IV)]	HP:0000015	Bladder diverticulum	23
1307	Q07092	COGA1	Collagen alpha-1(XVI) chain	HP:0000015	Bladder diverticulum	24
871	P50454	SERPH	Serpin H1 (47 kDa heat shock protein) (Arsenic-transactivated protein 3) (AsTP3) (Cell proliferation-inducing gene 14 protein) (Collagen-binding protein) (Colligin) (Rheumatoid arthritis-related antigen RA-A47)	HP:0000015	Bladder diverticulum	25
4015	P28300	LYOX	Protein-lysine 6-oxidase (EC 1.4.3.13) (Lysyl oxidase) [Cleaved into: Protein-lysine 6-oxidase, long form; Protein-lysine 6-oxidase, short form]	HP:0000015	Bladder diverticulum	26
5352	O00469	PLOD2	Procollagen-lysine,2-oxoglutarate 5-dioxygenase 2 (EC 1.14.11.4) (Lysyl hydroxylase 2) (LH2)	HP:0000015	Bladder diverticulum	27
2199	P98095	FBLN2	Fibulin-2 (FIBL-2)	HP:0000015	Bladder diverticulum	28
1300	Q03692	COAA1	Collagen alpha-1(X) chain	HP:0000015	Bladder diverticulum	29
1634	P07585	PGS2	Decorin (Bone proteoglycan II) (PG-S2) (PG40)	HP:0000015	Bladder diverticulum	30
1285	Q01955	CO4A3	Collagen alpha-3(IV) chain (Goodpasture antigen) [Cleaved into: Tumstatin]	HP:0000015	Bladder diverticulum	31
30008	O95967	FBLN4	EGF-containing fibulin-like extracellular matrix protein 2 (Fibulin-4) (FIBL-4) (Protein UPH1)	HP:0000015	Bladder diverticulum	32
1297	P20849	CO9A1	Collagen alpha-1(IX) chain	HP:0000015	Bladder diverticulum	33
633	P21810	PGS1	Biglycan (Bone/cartilage proteoglycan I) (PG-S1)	HP:0000015	Bladder diverticulum	34
60681	Q96AY3	FKB10	Peptidyl-prolyl cis-trans isomerase FKBP10 (PPIase FKBP10) (EC 5.2.1.8) (65 kDa FK506-binding protein) (65 kDa FKBP) (FKBP-65) (FK506-binding protein 10) (FKBP-10) (Immunophilin FKBP65) (Rotamase)	HP:0000015	Bladder diverticulum	35
1295	P27658	CO8A1	Collagen alpha-1(VIII) chain (Endothelial collagen) [Cleaved into: Vastatin]	HP:0000015	Bladder diverticulum	36
54829	Q9BXN1	ASPN	Asporin (Periodontal ligament-associated protein 1) (PLAP-1)	HP:0000015	Bladder diverticulum	37
8076	Q13361	MFAP5	Microfibrillar-associated protein 5 (MFAP-5) (MP25) (Microfibril-associated glycoprotein 2) (MAGP-2)	HP:0000015	Bladder diverticulum	38
10516	Q9UBX5	FBLN5	Fibulin-5 (FIBL-5) (Developmental arteries and neural crest EGF-like protein) (Dance) (Urine p50 protein) (UP50)	HP:0000015	Bladder diverticulum	39
2200	P35555	FBN1	Fibrillin-1 [Cleaved into: Asprosin]	HP:0000015	Bladder diverticulum	40
59	P62736	ACTA	Actin, aortic smooth muscle (Alpha-actin-2) (Cell growth-inhibiting gene 46 protein) [Cleaved into: Actin, aortic smooth muscle, intermediate form]	HP:0000015	Bladder diverticulum	41
4060	P51884	LUM	Lumican (Keratan sulfate proteoglycan lumican) (KSPG lumican)	HP:0000015	Bladder diverticulum	42
4053	Q14767	LTBP2	Latent-transforming growth factor beta-binding protein 2 (LTBP-2)	HP:0000015	Bladder diverticulum	43
2331	Q06828	FMOD	Fibromodulin (FM) (Collagen-binding 59 kDa protein) (Keratan sulfate proteoglycan fibromodulin) (KSPG fibromodulin)	HP:0000015	Bladder diverticulum	44
6678	P09486	SPRC	SPARC (Basement-membrane protein 40) (BM-40) (Osteonectin) (ON) (Secreted protein acidic and rich in cysteine)	HP:0000015	Bladder diverticulum	45
151887	Q76M96	CCD80	Coiled-coil domain-containing protein 80 (Down-regulated by oncogenes protein 1) (Up-regulated in BRS-3 deficient mouse homolog)	HP:0000015	Bladder diverticulum	46
84171	Q96JB6	LOXL4	Lysyl oxidase homolog 4 (EC 1.4.3.-) (Lysyl oxidase-like protein 4) (Lysyl oxidase-related protein C)	HP:0000015	Bladder diverticulum	47
8985	O60568	PLOD3	Multifunctional procollagen lysine hydroxylase and glycosyltransferase LH3 [Includes: Procollagen-lysine,2-oxoglutarate 5-dioxygenase 3 (EC 1.14.11.4) (Lysyl hydroxylase 3) (LH3); Procollagen glycosyltransferase (EC 2.4.1.50) (EC 2.4.1.66) (Galactosylhydroxylysine-glucosyltransferase) (Procollagen galactosyltransferase) (Procollagen glucosyltransferase)]	HP:0000015	Bladder diverticulum	48
2192	P23142	FBLN1	Fibulin-1 (FIBL-1)	HP:0000015	Bladder diverticulum	49
1286	P53420	CO4A4	Collagen alpha-4(IV) chain	HP:0000015	Bladder diverticulum	50
4239	P55083	MFAP4	Microfibril-associated glycoprotein 4	HP:0000015	Bladder diverticulum	51
1294	Q02388	CO7A1	Collagen alpha-1(VII) chain (Long-chain collagen) (LC collagen)	HP:0000015	Bladder diverticulum	52
4237	P55001	MFAP2	Microfibrillar-associated protein 2 (MFAP-2) (Microfibril-associated glycoprotein 1) (MAGP) (MAGP-1)	HP:0000015	Bladder diverticulum	53
649	P13497	BMP1	Bone morphogenetic protein 1 (BMP-1) (EC 3.4.24.19) (Mammalian tolloid protein) (mTld) (Procollagen C-proteinase) (PCP)	HP:0000015	Bladder diverticulum	54
84695	P58215	LOXL3	Lysyl oxidase homolog 3 (EC 1.4.3.-) (EC 1.4.3.13) (Lysyl oxidase-like protein 3)	HP:0000015	Bladder diverticulum	55
5034	P07237	PDIA1	Protein disulfide-isomerase (PDI) (EC 5.3.4.1) (Cellular thyroid hormone-binding protein) (Prolyl 4-hydroxylase subunit beta) (p55)	HP:0000015	Bladder diverticulum	56
1299	Q14050	CO9A3	Collagen alpha-3(IX) chain	HP:0000015	Bladder diverticulum	57
26577	Q9UKZ9	PCOC2	Procollagen C-endopeptidase enhancer 2 (Procollagen COOH-terminal proteinase enhancer 2) (PCPE-2) (Procollagen C-proteinase enhancer 2)	HP:0000015	Bladder diverticulum	58
9509	O95450	ATS2	A disintegrin and metalloproteinase with thrombospondin motifs 2 (ADAM-TS 2) (ADAM-TS2) (ADAMTS-2) (EC 3.4.24.14) (Procollagen I N-proteinase) (PC I-NP) (Procollagen I/II amino propeptide-processing enzyme) (Procollagen N-endopeptidase) (pNPI)	HP:0000015	Bladder diverticulum	59
169044	Q8NFW1	COMA1	Collagen alpha-1(XXII) chain	HP:0000015	Bladder diverticulum	60
5033	P13674	P4HA1	Prolyl 4-hydroxylase subunit alpha-1 (4-PH alpha-1) (EC 1.14.11.2) (Procollagen-proline,2-oxoglutarate-4-dioxygenase subunit alpha-1)	HP:0000015	Bladder diverticulum	61
84627	Q96JG9	ZN469	Zinc finger protein 469	HP:0000015	Bladder diverticulum	62
8483	O75339	CILP1	Cartilage intermediate layer protein 1 (CILP-1) (Cartilage intermediate-layer protein) [Cleaved into: Cartilage intermediate layer protein 1 C1; Cartilage intermediate layer protein 1 C2]	HP:0000015	Bladder diverticulum	63
7048	P37173	TGFR2	TGF-beta receptor type-2 (TGFR-2) (EC 2.7.11.30) (TGF-beta type II receptor) (Transforming growth factor-beta receptor type II) (TGF-beta receptor type II) (TbetaR-II)	HP:0000015	Bladder diverticulum	64
64175	Q32P28	P3H1	Prolyl 3-hydroxylase 1 (EC 1.14.11.7) (Growth suppressor 1) (Leucine- and proline-enriched proteoglycan 1) (Leprecan-1)	HP:0000015	Bladder diverticulum	65
50509	P25940	CO5A3	Collagen alpha-3(V) chain	HP:0000015	Bladder diverticulum	66
2201	P35556	FBN2	Fibrillin-2 [Cleaved into: Fibrillin-2 C-terminal peptide]	HP:0000015	Bladder diverticulum	67
4629	P35749	MYH11	Myosin-11 (Myosin heavy chain 11) (Myosin heavy chain, smooth muscle isoform) (SMMHC)	HP:0000015	Bladder diverticulum	68
4054	Q9NS15	LTBP3	Latent-transforming growth factor beta-binding protein 3 (LTBP-3)	HP:0000015	Bladder diverticulum	69
4314	P08254	MMP3	Stromelysin-1 (SL-1) (EC 3.4.24.17) (Matrix metalloproteinase-3) (MMP-3) (Transin-1)	HP:0000015	Bladder diverticulum	70
121340	Q8TDD2	SP7	Transcription factor Sp7 (Zinc finger protein osterix)	HP:0000015	Bladder diverticulum	71
1490	P29279	CCN2	CCN family member 2 (Cellular communication network factor 2) (Connective tissue growth factor) (Hypertrophic chondrocyte-specific protein 24) (Insulin-like growth factor-binding protein 8) (IBP-8) (IGF-binding protein 8) (IGFBP-8)	HP:0000015	Bladder diverticulum	72
7043	P10600	TGFB3	Transforming growth factor beta-3 proprotein [Cleaved into: Latency-associated peptide (LAP); Transforming growth factor beta-3 (TGF-beta-3)]	HP:0000015	Bladder diverticulum	73
4147	O00339	MATN2	Matrilin-2	HP:0000015	Bladder diverticulum	74
7148	P22105	TENX	Tenascin-X (TN-X) (Hexabrachion-like protein)	HP:0000015	Bladder diverticulum	75
1287	P29400	CO4A5	Collagen alpha-5(IV) chain	HP:0000015	Bladder diverticulum	76
7046	P36897	TGFR1	TGF-beta receptor type-1 (TGFR-1) (EC 2.7.11.30) (Activin A receptor type II-like protein kinase of 53kD) (Activin receptor-like kinase 5) (ALK-5) (ALK5) (Serine/threonine-protein kinase receptor R4) (SKR4) (TGF-beta type I receptor) (Transforming growth factor-beta receptor type I) (TGF-beta receptor type I) (TbetaR-I)	HP:0000015	Bladder diverticulum	77
83468	Q9H1C3	GL8D2	Glycosyltransferase 8 domain-containing protein 2 (EC 2.4.1.-)	HP:0000015	Bladder diverticulum	78
165	Q8IUX7	AEBP1	Adipocyte enhancer-binding protein 1 (AE-binding protein 1) (Aortic carboxypeptidase-like protein)	HP:0000015	Bladder diverticulum	79
340267	Q2UY09	COSA1	Collagen alpha-1(XXVIII) chain	HP:0000015	Bladder diverticulum	80
4322	P45452	MMP13	Collagenase 3 (EC 3.4.24.-) (Matrix metalloproteinase-13) (MMP-13)	HP:0000015	Bladder diverticulum	81
4921	Q16832	DDR2	Discoidin domain-containing receptor 2 (Discoidin domain receptor 2) (EC 2.7.10.1) (CD167 antigen-like family member B) (Discoidin domain-containing receptor tyrosine kinase 2) (Neurotrophic tyrosine kinase, receptor-related 3) (Receptor protein-tyrosine kinase TKT) (Tyrosine-protein kinase TYRO10) (CD antigen CD167b)	HP:0000015	Bladder diverticulum	82
131873	A6NMZ7	CO6A6	Collagen alpha-6(VI) chain	HP:0000015	Bladder diverticulum	83
5167	P22413	ENPP1	Ectonucleotide pyrophosphatase/phosphodiesterase family member 1 (E-NPP 1) (Membrane component chromosome 6 surface marker 1) (Phosphodiesterase I/nucleotide pyrophosphatase 1) (Plasma-cell membrane glycoprotein PC-1) [Cleaved into: Ectonucleotide pyrophosphatase/phosphodiesterase family member 1, secreted form] [Includes: Alkaline phosphodiesterase I (EC 3.1.4.1); Nucleotide pyrophosphatase (NPP…	HP:0000015	Bladder diverticulum	84
1288	Q14031	CO4A6	Collagen alpha-6(IV) chain	HP:0000015	Bladder diverticulum	85
2969	P78347	GTF2I	General transcription factor II-I (GTFII-I) (TFII-I) (Bruton tyrosine kinase-associated protein 135) (BAP-135) (BTK-associated protein 135) (SRF-Phox1-interacting protein) (SPIN) (Williams-Beuren syndrome chromosomal region 6 protein)	HP:0000015	Bladder diverticulum	86
10491	O75718	CRTAP	Cartilage-associated protein	HP:0000015	Bladder diverticulum	87
4969	P20774	MIME	Mimecan (Osteoglycin) (Osteoinductive factor) (OIF)	HP:0000015	Bladder diverticulum	88
8974	O15460	P4HA2	Prolyl 4-hydroxylase subunit alpha-2 (4-PH alpha-2) (EC 1.14.11.2) (Procollagen-proline,2-oxoglutarate-4-dioxygenase subunit alpha-2)	HP:0000015	Bladder diverticulum	89
221044	Q8WVF2	UCMA	Unique cartilage matrix-associated protein [Cleaved into: Unique cartilage matrix-associated protein C-terminal fragment (Ucma-C) (Gla-rich protein) (GRP)]	HP:0000015	Bladder diverticulum	90
4313	P08253	MMP2	72 kDa type IV collagenase (EC 3.4.24.24) (72 kDa gelatinase) (Gelatinase A) (Matrix metalloproteinase-2) (MMP-2) (TBE-1) [Cleaved into: PEX]	HP:0000015	Bladder diverticulum	91
7045	Q15582	BGH3	Transforming growth factor-beta-induced protein ig-h3 (Beta ig-h3) (Kerato-epithelin) (RGD-containing collagen-associated protein) (RGD-CAP)	HP:0000015	Bladder diverticulum	92
81031	O95528	GTR10	Solute carrier family 2, facilitated glucose transporter member 10 (Glucose transporter type 10) (GLUT-10)	HP:0000015	Bladder diverticulum	93
2316	P21333	FLNA	Filamin-A (FLN-A) (Actin-binding protein 280) (ABP-280) (Alpha-filamin) (Endothelial actin-binding protein) (Filamin-1) (Non-muscle filamin)	HP:0000015	Bladder diverticulum	94
1805	Q07507	DERM	Dermatopontin (Tyrosine-rich acidic matrix protein) (TRAMP)	HP:0000015	Bladder diverticulum	95
7078	P35625	TIMP3	Metalloproteinase inhibitor 3 (Protein MIG-5) (Tissue inhibitor of metalloproteinases 3) (TIMP-3)	HP:0000015	Bladder diverticulum	96
283208	Q7Z4N8	P4HA3	Prolyl 4-hydroxylase subunit alpha-3 (4-PH alpha-3) (EC 1.14.11.2) (Procollagen-proline,2-oxoglutarate-4-dioxygenase subunit alpha-3)	HP:0000015	Bladder diverticulum	97
7290	P54198	HIRA	Protein HIRA (TUP1-like enhancer of split protein 1)	HP:0000015	Bladder diverticulum	98
8476	Q5VT25	MRCKA	Serine/threonine-protein kinase MRCK alpha (EC 2.7.11.1) (CDC42-binding protein kinase alpha) (DMPK-like alpha) (Myotonic dystrophy kinase-related CDC42-binding kinase alpha) (MRCK alpha) (Myotonic dystrophy protein kinase-like alpha)	HP:0000015	Bladder diverticulum	99
10269	O75844	FACE1	CAAX prenyl protease 1 homolog (EC 3.4.24.84) (Farnesylated proteins-converting enzyme 1) (FACE-1) (Prenyl protein-specific endoprotease 1) (Zinc metalloproteinase Ste24 homolog)	HP:0000015	Bladder diverticulum	100
1308	Q9UMD9	COHA1	Collagen alpha-1(XVII) chain (180 kDa bullous pemphigoid antigen 2) (Bullous pemphigoid antigen 2) [Cleaved into: 120 kDa linear IgA disease antigen (120 kDa linear IgA dermatosis antigen) (Linear IgA disease antigen 1) (LAD-1); 97 kDa linear IgA disease antigen (97 kDa linear IgA bullous dermatosis antigen) (97 kDa LAD antigen) (97-LAD) (Linear IgA bullous disease antigen of 97 kDa) (LABD97)]	HP:0000015	Bladder diverticulum	101
55033	Q9NWM8	FKB14	Peptidyl-prolyl cis-trans isomerase FKBP14 (PPIase FKBP14) (EC 5.2.1.8) (22 kDa FK506-binding protein) (22 kDa FKBP) (FKBP-22) (FK506-binding protein 14) (FKBP-14) (Rotamase)	HP:0000015	Bladder diverticulum	102
4088	P84022	SMAD3	Mothers against decapentaplegic homolog 3 (MAD homolog 3) (Mad3) (Mothers against DPP homolog 3) (hMAD-3) (JV15-2) (SMAD family member 3) (SMAD 3) (Smad3) (hSMAD3)	HP:0000015	Bladder diverticulum	103
57124	Q9HCU0	CD248	Endosialin (Tumor endothelial marker 1) (CD antigen CD248)	HP:0000015	Bladder diverticulum	104
1311	P49747	COMP	Cartilage oligomeric matrix protein (COMP) (Thrombospondin-5) (TSP5)	HP:0000015	Bladder diverticulum	105
54971	Q8N9N5	BANP	Protein BANP (BEN domain-containing protein 1) (Btg3-associated nuclear protein) (Scaffold/matrix-associated region-1-binding protein)	HP:0000015	Bladder diverticulum	106
2317	O75369	FLNB	Filamin-B (FLN-B) (ABP-278) (ABP-280 homolog) (Actin-binding-like protein) (Beta-filamin) (Filamin homolog 1) (Fh1) (Filamin-3) (Thyroid autoantigen) (Truncated actin-binding protein) (Truncated ABP)	HP:0000015	Bladder diverticulum	107
29940	Q9UL01	DSE	Dermatan-sulfate epimerase (DS epimerase) (EC 5.1.3.19) (Chondroitin-glucuronate 5-epimerase) (Squamous cell carcinoma antigen recognized by T-cells 2) (SART-2)	HP:0000015	Bladder diverticulum	108
5479	P23284	PPIB	Peptidyl-prolyl cis-trans isomerase B (PPIase B) (EC 5.2.1.8) (CYP-S1) (Cyclophilin B) (Rotamase B) (S-cyclophilin) (SCYLP)	HP:0000015	Bladder diverticulum	109
3037	Q92819	HYAS2	Hyaluronan synthase 2 (EC 2.4.1.212) (Hyaluronate synthase 2) (Hyaluronic acid synthase 2) (HA synthase 2)	HP:0000015	Bladder diverticulum	110
5176	P36955	PEDF	Pigment epithelium-derived factor (PEDF) (Cell proliferation-inducing gene 35 protein) (EPC-1) (Serpin F1)	HP:0000015	Bladder diverticulum	111
2202	Q12805	FBLN3	EGF-containing fibulin-like extracellular matrix protein 1 (Extracellular protein S1-5) (Fibrillin-like protein) (Fibulin-3) (FIBL-3)	HP:0000015	Bladder diverticulum	112
540	P35670	ATP7B	Copper-transporting ATPase 2 (EC 7.2.2.8) (Copper pump 2) (Wilson disease-associated protein) [Cleaved into: WND/140 kDa]	HP:0000015	Bladder diverticulum	113
3068	P51858	HDGF	Hepatoma-derived growth factor (HDGF) (High mobility group protein 1-like 2) (HMG-1L2)	HP:0000015	Bladder diverticulum	114
9569	Q9UHL9	GT2D1	General transcription factor II-I repeat domain-containing protein 1 (GTF2I repeat domain-containing protein 1) (General transcription factor III) (MusTRD1/BEN) (Muscle TFII-I repeat domain-containing protein 1) (Slow-muscle-fiber enhancer-binding protein) (USE B1-binding protein) (Williams-Beuren syndrome chromosomal region 11 protein) (Williams-Beuren syndrome chromosomal region 12 protein)	HP:0000015	Bladder diverticulum	115
1302	P13942	COBA2	Collagen alpha-2(XI) chain	HP:0000015	Bladder diverticulum	116
1842	O94769	ECM2	Extracellular matrix protein 2 (Matrix glycoprotein SC1/ECM2)	HP:0000015	Bladder diverticulum	117
8510	O75900	MMP23	Matrix metalloproteinase-23 (MMP-23) (EC 3.4.24.-) (Femalysin) (MIFR-1) (Matrix metalloproteinase-21) (MMP-21) (Matrix metalloproteinase-22) (MMP-22) [Cleaved into: Matrix metalloproteinase-23, soluble form]	HP:0000015	Bladder diverticulum	118
369	P10398	ARAF	Serine/threonine-protein kinase A-Raf (EC 2.7.11.1) (Proto-oncogene A-Raf) (Proto-oncogene A-Raf-1) (Proto-oncogene Pks)	HP:0000015	Bladder diverticulum	119
7058	P35442	TSP2	Thrombospondin-2	HP:0000015	Bladder diverticulum	120
4146	P21941	MATN1	Cartilage matrix protein (Matrilin-1)	HP:0000015	Bladder diverticulum	121
3516	Q06330	SUH	Recombining binding protein suppressor of hairless (CBF-1) (J kappa-recombination signal-binding protein) (RBP-J kappa) (RBP-J) (RBP-JK) (Renal carcinoma antigen NY-REN-30)	HP:0000015	Bladder diverticulum	122
6093	Q13464	ROCK1	Rho-associated protein kinase 1 (EC 2.7.11.1) (Renal carcinoma antigen NY-REN-35) (Rho-associated, coiled-coil-containing protein kinase 1) (Rho-associated, coiled-coil-containing protein kinase I) (ROCK-I) (p160 ROCK-1) (p160ROCK)	HP:0000015	Bladder diverticulum	123
4087	Q15796	SMAD2	Mothers against decapentaplegic homolog 2 (MAD homolog 2) (Mothers against DPP homolog 2) (JV18-1) (Mad-related protein 2) (hMAD-2) (SMAD family member 2) (SMAD 2) (Smad2) (hSMAD2)	HP:0000015	Bladder diverticulum	124
84570	Q9BXS0	COPA1	Collagen alpha-1(XXV) chain (Alzheimer disease amyloid-associated protein) (AMY) (CLAC-P) [Cleaved into: Collagen-like Alzheimer amyloid plaque component (CLAC)]	HP:0000015	Bladder diverticulum	125
11317	Q9UBG7	RBPJL	Recombining binding protein suppressor of hairless-like protein (Transcription factor RBP-L)	HP:0000015	Bladder diverticulum	126
800	Q05682	CALD1	Caldesmon (CDM)	HP:0000015	Bladder diverticulum	127
860	Q13950	RUNX2	Runt-related transcription factor 2 (Acute myeloid leukemia 3 protein) (Core-binding factor subunit alpha-1) (CBF-alpha-1) (Oncogene AML-3) (Osteoblast-specific transcription factor 2) (OSF-2) (Polyomavirus enhancer-binding protein 2 alpha A subunit) (PEA2-alpha A) (PEBP2-alpha A) (SL3-3 enhancer factor 1 alpha A subunit) (SL3/AKV core-binding factor alpha A subunit)	HP:0000015	Bladder diverticulum	128
538	Q04656	ATP7A	Copper-transporting ATPase 1 (EC 7.2.2.8) (Copper pump 1) (Menkes disease-associated protein)	HP:0000015	Bladder diverticulum	129
85007	Q8IUZ5	AT2L2	5-phosphohydroxy-L-lysine phospho-lyase (EC 4.2.3.134) (Alanine--glyoxylate aminotransferase 2-like 2)	HP:0000015	Bladder diverticulum	130
53635	Q86YD1	PTOV1	Prostate tumor-overexpressed gene 1 protein (PTOV-1) (Activator interaction domain-containing protein 2)	HP:0000015	Bladder diverticulum	131
56980	Q9NQV6	PRD10	PR domain zinc finger protein 10 (EC 2.1.1.-) (PR domain-containing protein 10) (Tristanin)	HP:0000015	Bladder diverticulum	132
5396	P54821	PRRX1	Paired mesoderm homeobox protein 1 (Homeobox protein PHOX1) (Paired-related homeobox protein 1) (PRX-1)	HP:0000015	Bladder diverticulum	133
9148	O76050	NEUL1	E3 ubiquitin-protein ligase NEURL1 (EC 2.3.2.27) (Neuralized-like protein 1A) (h-neu) (h-neuralized 1) (RING finger protein 67) (RING-type E3 ubiquitin transferase NEURL1)	HP:0000015	Bladder diverticulum	134
4638	Q15746	MYLK	Myosin light chain kinase, smooth muscle (MLCK) (smMLCK) (EC 2.7.11.18) (Kinase-related protein) (KRP) (Telokin) [Cleaved into: Myosin light chain kinase, smooth muscle, deglutamylated form]	HP:0000015	Bladder diverticulum	135
23500	Q86T65	DAAM2	Disheveled-associated activator of morphogenesis 2	HP:0000015	Bladder diverticulum	136
113189	Q8NCH0	CHSTE	Carbohydrate sulfotransferase 14 (EC 2.8.2.35) (Dermatan 4-sulfotransferase 1) (D4ST-1) (hD4ST1)	HP:0000015	Bladder diverticulum	137
7042	P61812	TGFB2	Transforming growth factor beta-2 proprotein (Cetermin) (Glioblastoma-derived T-cell suppressor factor) (G-TSF) [Cleaved into: Latency-associated peptide (LAP); Transforming growth factor beta-2 (TGF-beta-2)]	HP:0000015	Bladder diverticulum	138
25878	Q9NR99	MXRA5	Matrix-remodeling-associated protein 5 (Adhesion protein with leucine-rich repeats and immunoglobulin domains related to perlecan) (Adlican)	HP:0000015	Bladder diverticulum	139
4221	O00255	MEN1	Menin	HP:0000015	Bladder diverticulum	140
9469	Q7LGC8	CHST3	Carbohydrate sulfotransferase 3 (EC 2.8.2.17) (Chondroitin 6-O-sulfotransferase 1) (C6ST-1) (Chondroitin 6-sulfotransferase) (Galactose/N-acetylglucosamine/N-acetylglucosamine 6-O-sulfotransferase 0) (GST-0)	HP:0000015	Bladder diverticulum	141
642658	Q7RTU7	SCX	Basic helix-loop-helix transcription factor scleraxis (Class A basic helix-loop-helix protein 41) (bHLHa41) (Class A basic helix-loop-helix protein 48) (bHLHa48)	HP:0000015	Bladder diverticulum	142
2697	P17302	CXA1	Gap junction alpha-1 protein (Connexin-43) (Cx43) (Gap junction 43 kDa heart protein)	HP:0000015	Bladder diverticulum	143
5592	Q13976	KGP1	cGMP-dependent protein kinase 1 (cGK 1) (cGK1) (EC 2.7.11.12) (cGMP-dependent protein kinase I) (cGKI)	HP:0000015	Bladder diverticulum	144
23002	Q9Y4D1	DAAM1	Disheveled-associated activator of morphogenesis 1	HP:0000015	Bladder diverticulum	145
55214	Q8IVL5	P3H2	Prolyl 3-hydroxylase 2 (EC 1.14.11.7) (Leprecan-like protein 1) (Myxoid liposarcoma-associated protein 4)	HP:0000015	Bladder diverticulum	146
176	P16112	PGCA	Aggrecan core protein (Cartilage-specific proteoglycan core protein) (CSPCP) (Chondroitin sulfate proteoglycan core protein 1) (Chondroitin sulfate proteoglycan 1) [Cleaved into: Aggrecan core protein 2]	HP:0000015	Bladder diverticulum	147
9275	Q9BQE9	BCL7B	B-cell CLL/lymphoma 7 protein family member B (allergen Hom s 3)	HP:0000015	Bladder diverticulum	148
673	P15056	BRAF	Serine/threonine-protein kinase B-raf (EC 2.7.11.1) (Proto-oncogene B-Raf) (p94) (v-Raf murine sarcoma viral oncogene homolog B1)	HP:0000015	Bladder diverticulum	149
4649	B2RTY4	MYO9A	Unconventional myosin-IXa (Unconventional myosin-9a)	HP:0000015	Bladder diverticulum	150
3914	Q13751	LAMB3	Laminin subunit beta-3 (Epiligrin subunit bata) (Kalinin B1 chain) (Kalinin subunit beta) (Laminin B1k chain) (Laminin-5 subunit beta) (Nicein subunit beta)	HP:0000016	Urinary retention	1
3918	Q13753	LAMC2	Laminin subunit gamma-2 (Cell-scattering factor 140 kDa subunit) (CSF 140 kDa subunit) (Epiligrin subunit gamma) (Kalinin subunit gamma) (Kalinin/nicein/epiligrin 100 kDa subunit) (Ladsin 140 kDa subunit) (Laminin B2t chain) (Laminin-5 subunit gamma) (Large adhesive scatter factor 140 kDa subunit) (Nicein subunit gamma)	HP:0000016	Urinary retention	2
3679	Q13683	ITA7	Integrin alpha-7 [Cleaved into: Integrin alpha-7 heavy chain; Integrin alpha-7 light chain; Integrin alpha-7 70 kDa form]	HP:0000016	Urinary retention	3
284217	P25391	LAMA1	Laminin subunit alpha-1 (Laminin A chain) (Laminin-1 subunit alpha) (Laminin-3 subunit alpha) (S-laminin subunit alpha) (S-LAM alpha)	HP:0000016	Urinary retention	4
3911	O15230	LAMA5	Laminin subunit alpha-5 (Laminin-10 subunit alpha) (Laminin-11 subunit alpha) (Laminin-15 subunit alpha)	HP:0000016	Urinary retention	5
3909	Q16787	LAMA3	Laminin subunit alpha-3 (Epiligrin 170 kDa subunit) (E170) (Epiligrin subunit alpha) (Kalinin subunit alpha) (Laminin-5 subunit alpha) (Laminin-6 subunit alpha) (Laminin-7 subunit alpha) (Nicein subunit alpha)	HP:0000016	Urinary retention	6
3910	Q16363	LAMA4	Laminin subunit alpha-4 (Laminin-14 subunit alpha) (Laminin-8 subunit alpha) (Laminin-9 subunit alpha)	HP:0000016	Urinary retention	7
3691	P16144	ITB4	Integrin beta-4 (GP150) (CD antigen CD104)	HP:0000016	Urinary retention	8
3908	P24043	LAMA2	Laminin subunit alpha-2 (Laminin M chain) (Laminin-12 subunit alpha) (Laminin-2 subunit alpha) (Laminin-4 subunit alpha) (Merosin heavy chain)	HP:0000016	Urinary retention	9
10319	Q9Y6N6	LAMC3	Laminin subunit gamma-3 (Laminin-12 subunit gamma) (Laminin-14 subunit gamma) (Laminin-15 subunit gamma)	HP:0000016	Urinary retention	10
3672	P56199	ITA1	Integrin alpha-1 (CD49 antigen-like family member A) (Laminin and collagen receptor) (VLA-1) (CD antigen CD49a)	HP:0000016	Urinary retention	11
1605	Q14118	DAG1	Dystroglycan (Dystrophin-associated glycoprotein 1) [Cleaved into: Alpha-dystroglycan (Alpha-DG); Beta-dystroglycan (Beta-DG)]	HP:0000016	Urinary retention	12
8516	P53708	ITA8	Integrin alpha-8 [Cleaved into: Integrin alpha-8 heavy chain; Integrin alpha-8 light chain]	HP:0000016	Urinary retention	13
23345	Q8NF91	SYNE1	Nesprin-1 (Enaptin) (KASH domain-containing protein 1) (KASH1) (Myocyte nuclear envelope protein 1) (Myne-1) (Nuclear envelope spectrin repeat protein 1) (Synaptic nuclear envelope protein 1) (Syne-1)	HP:0000016	Urinary retention	14
7402	P46939	UTRO	Utrophin (Dystrophin-related protein 1) (DRP-1)	HP:0000016	Urinary retention	15
1756	P11532	DMD	Dystrophin	HP:0000016	Urinary retention	16
4647	Q13402	MYO7A	Unconventional myosin-VIIa	HP:0000016	Urinary retention	17
23499	Q9UPN3	MACF1	Microtubule-actin cross-linking factor 1, isoforms 1/2/3/5 (620 kDa actin-binding protein) (ABP620) (Actin cross-linking family protein 7) (Macrophin-1) (Trabeculin-alpha)	HP:0000016	Urinary retention	18
3915	P11047	LAMC1	Laminin subunit gamma-1 (Laminin B2 chain) (Laminin-1 subunit gamma) (Laminin-10 subunit gamma) (Laminin-11 subunit gamma) (Laminin-2 subunit gamma) (Laminin-3 subunit gamma) (Laminin-4 subunit gamma) (Laminin-6 subunit gamma) (Laminin-7 subunit gamma) (Laminin-8 subunit gamma) (Laminin-9 subunit gamma) (S-laminin subunit gamma) (S-LAM gamma)	HP:0000016	Urinary retention	19
3675	P26006	ITA3	Integrin alpha-3 (CD49 antigen-like family member C) (FRP-2) (Galactoprotein B3) (GAPB3) (VLA-3 subunit alpha) (CD antigen CD49c) [Cleaved into: Integrin alpha-3 heavy chain; Integrin alpha-3 light chain]	HP:0000016	Urinary retention	20
3913	P55268	LAMB2	Laminin subunit beta-2 (Laminin B1s chain) (Laminin-11 subunit beta) (Laminin-14 subunit beta) (Laminin-15 subunit beta) (Laminin-3 subunit beta) (Laminin-4 subunit beta) (Laminin-7 subunit beta) (Laminin-9 subunit beta) (S-laminin subunit beta) (S-LAM beta)	HP:0000016	Urinary retention	21
2074	P0DP91	ERPG3	Chimeric ERCC6-PGBD3 protein (Chimeric CSB-PGBD3 protein)	HP:0000016	Urinary retention	22
3694	P18564	ITB6	Integrin beta-6	HP:0000016	Urinary retention	23
5339	Q15149	PLEC	Plectin (PCN) (PLTN) (Hemidesmosomal protein 1) (HD1) (Plectin-1)	HP:0000016	Urinary retention	24
8515	O75578	ITA10	Integrin alpha-10	HP:0000016	Urinary retention	25
2074	P0DP91	ERPG3	Chimeric ERCC6-PGBD3 protein (Chimeric CSB-PGBD3 protein)	HP:0000016	Urinary retention	26
2317	O75369	FLNB	Filamin-B (FLN-B) (ABP-278) (ABP-280 homolog) (Actin-binding-like protein) (Beta-filamin) (Filamin homolog 1) (Fh1) (Filamin-3) (Thyroid autoantigen) (Truncated actin-binding protein) (Truncated ABP)	HP:0000016	Urinary retention	27
4648	Q6PIF6	MYO7B	Unconventional myosin-VIIb	HP:0000016	Urinary retention	28
93035	Q86WI1	PKHL1	Fibrocystin-L (Polycystic kidney and hepatic disease 1-like protein 1) (PKHD1-like protein 1)	HP:0000016	Urinary retention	29
3655	P23229	ITA6	Integrin alpha-6 (CD49 antigen-like family member F) (VLA-6) (CD antigen CD49f) [Cleaved into: Integrin alpha-6 heavy chain; Integrin alpha-6 light chain; Processed integrin alpha-6 (Alpha6p)]	HP:0000016	Urinary retention	30
3696	P26012	ITB8	Integrin beta-8	HP:0000016	Urinary retention	31
51168	Q9UKN7	MYO15	Unconventional myosin-XV (Unconventional myosin-15)	HP:0000016	Urinary retention	32
3693	P18084	ITB5	Integrin beta-5	HP:0000016	Urinary retention	33
140469	Q8WXR4	MYO3B	Myosin-IIIb (EC 2.7.11.1)	HP:0000016	Urinary retention	34
667	Q03001	DYST	Dystonin (230 kDa bullous pemphigoid antigen) (230/240 kDa bullous pemphigoid antigen) (Bullous pemphigoid antigen 1) (BPA) (Bullous pemphigoid antigen) (Dystonia musculorum protein) (Hemidesmosomal plaque protein)	HP:0000016	Urinary retention	35
50485	Q9NZC9	SMAL1	SWI/SNF-related matrix-associated actin-dependent regulator of chromatin subfamily A-like protein 1 (EC 3.6.4.-) (HepA-related protein) (hHARP) (Sucrose nonfermenting protein 2-like 1)	HP:0000016	Urinary retention	36
53904	Q8NEV4	MYO3A	Myosin-IIIa (EC 2.7.11.1)	HP:0000016	Urinary retention	37
22798	A4D0S4	LAMB4	Laminin subunit beta-4 (Laminin beta-1-related protein)	HP:0000016	Urinary retention	38
6261	P21817	RYR1	Ryanodine receptor 1 (RYR-1) (RyR1) (Skeletal muscle calcium release channel) (Skeletal muscle ryanodine receptor) (Skeletal muscle-type ryanodine receptor) (Type 1 ryanodine receptor)	HP:0000016	Urinary retention	39
22801	Q9UKX5	ITA11	Integrin alpha-11	HP:0000016	Urinary retention	40
3912	P07942	LAMB1	Laminin subunit beta-1 (Laminin B1 chain) (Laminin-1 subunit beta) (Laminin-10 subunit beta) (Laminin-12 subunit beta) (Laminin-2 subunit beta) (Laminin-6 subunit beta) (Laminin-8 subunit beta)	HP:0000016	Urinary retention	41
6596	Q14527	HLTF	Helicase-like transcription factor (EC 2.3.2.27) (EC 3.6.4.-) (DNA-binding protein/plasminogen activator inhibitor 1 regulator) (HIP116) (RING finger protein 80) (RING-type E3 ubiquitin transferase HLTF) (SWI/SNF-related matrix-associated actin-dependent regulator of chromatin subfamily A member 3) (Sucrose nonfermenting protein 2-like 3)	HP:0000016	Urinary retention	42
5747	Q05397	FAK1	Focal adhesion kinase 1 (FADK 1) (EC 2.7.10.2) (Focal adhesion kinase-related nonkinase) (FRNK) (Protein phosphatase 1 regulatory subunit 71) (PPP1R71) (Protein-tyrosine kinase 2) (p125FAK) (pp125FAK)	HP:0000016	Urinary retention	43
5290	P42336	PK3CA	Phosphatidylinositol 4,5-bisphosphate 3-kinase catalytic subunit alpha isoform (PI3-kinase subunit alpha) (PI3K-alpha) (PI3Kalpha) (PtdIns-3-kinase subunit alpha) (EC 2.7.1.137) (EC 2.7.1.153) (Phosphatidylinositol 4,5-bisphosphate 3-kinase 110 kDa catalytic subunit alpha) (PtdIns-3-kinase subunit p110-alpha) (p110alpha) (Phosphoinositide 3-kinase alpha) (Phosphoinositide-3-kinase catalytic alpha…	HP:0000016	Urinary retention	44
3030	P40939	ECHA	Trifunctional enzyme subunit alpha, mitochondrial (78 kDa gastrin-binding protein) (Monolysocardiolipin acyltransferase) (EC 2.3.1.-) (TP-alpha) [Includes: Long-chain enoyl-CoA hydratase (EC 4.2.1.17); Long chain 3-hydroxyacyl-CoA dehydrogenase (EC 1.1.1.211)]	HP:0000016	Urinary retention	45
2709	O95377	CXB5	Gap junction beta-5 protein (Connexin-31.1) (Cx31.1)	HP:0000016	Urinary retention	46
257218	Q149N8	SHPRH	E3 ubiquitin-protein ligase SHPRH (EC 2.3.2.27) (EC 3.6.4.-) (RING-type E3 ubiquitin transferase SHPRH) (SNF2, histone-linker, PHD and RING finger domain-containing helicase)	HP:0000016	Urinary retention	47
[truncated: 652,455+ more rows]
